# Supplementary material for: Single-cell transcriptome profiles of Drosophila fruitless-expressing neurons from both sexes
Source: eLife. 2023 Feb 1;12:e78511. doi: 10.7554/eLife.78511 (PMC9891730; doi:10.7554/eLife.78511)
Supplement: Source data 3. — Excel data table containing marker gene lists and cluster annotations for all analyses. Statistical tests of marker gene list overlaps with lists of genes shown to be enriched or differentially expressed at 48-hr after puparium formation (APF) in previous fru P1 Translating Ribosome Affinity Profiling (TRAP study Palmateer et al., 2021). This table also contains the Seurat integration analysis marker gene list. [file elife-78511-data3.xlsx]

## Sheet: README
Source data 3: Marker genes and annotations for all data sets
Sheet number:	Sheet:		Description
1	MaleMarkerGenes		Marker genes for each cluster in male data set analysis and annotation references pertaining to sheet 2
2	MaleClusterAnnotations		Cluster annotations for the male data set based on marker gene expression
3	FemaleMarkerGenes		Marker genes for each cluster in female data set analysis and annotation references pertaining to sheet 4
4	FemaleMarkerGeneAnnotations		Cluster annotations for the female data set based on marker gene expression
5	FullDataSetMarkerGenes		Marker genes for each cluster in full data set analysis and annotation references pertaining to sheet 6
6	FullDataClusterAnnotations		Cluster annotations for the full data set based on marker gene expression
7	Overlap with Davie et al.		Overlap in marker genes between full data set in our study and clusters in Davie et al.. Clusters defined in Davie et al. are listed across the columns and clusters in our data set are listed down column A. Number of overlapping genes and Jaccard index overlap are presented
8	Overlap with Allen et al.		Overlap in marker genes between full data set in our study and clusters in Allen et al.. Clusters defined in Allen et al. are listed across the columns and clusters in our data set are listed down column A. Number of overlapping genes and Jaccard index overlap are presented
9	Overlap with Avalos et al.		Overlap in marker genes between full data set in our study and clusters in Avalos et al.. Clusters defined in Avalos et al. are listed across the columns and clusters in our data set are listed down column A. Number of overlapping genes and Jaccard index overlap are presented
10	Overlap with Croset et al.		Overlap in marker genes between full data set in our study and clusters in Croset et al.. Clusters defined in Croset et al. are listed across the columns and clusters in our data set are listed down column A. Number of overlapping genes and Jaccard index overlap are presented
11	Gene overlap with fru P1 TRAP		Overlap testing between male, and female, and full data set marker genes (sheets 1, 3, and 5) with genes enriched in fru P1 neurons using Translating Ribosome Affinity Purification (TRAP) or show sex-differential expression between male and female fru P1 neurons at 48hr APF (Palmateer et al. 2021)
12	FullDataTFMarkerGenes		Transcription factors (TFs) that are marker genes in the full data set analysis
13	MarkerGenesIntegrated		Marker genes for each cluster in full data set integrated analysis shown in Figure 1 - figure supplement 5

## Sheet: 1.MaleMarkerGenes
	p_val	avg_logFC	pct.1	pct.2	p_val_adj	cluster	gene		Annotation reference
hth	1.74926e-05	0.522081	0.303	0.544	0.218482	0	hth
mbl	0.0041375	0.497805	0.43	0.706	1	0	mbl
eEF1alpha1	7.02444e-25	0.48982	0.215	0.635	8.77352e-21	0	eEF1alpha1
Dic1	5.11613e-09	0.486935	0.13	0.307	6.39004e-05	0	Dic1
CG11267	1.77101e-05	0.445843	0.364	0.719	0.221199	0	CG11267
COX5A	7.07441e-05	0.444493	0.592	0.88	0.883594	0	COX5A
Cisd2	3.20339e-14	0.4316	0.271	0.656	4.00104e-10	0	Cisd2
lawc	2.34852e-17	0.419196	0.2	0.537	2.9333e-13	0	lawc
ND-19	7.26436e-11	0.413652	0.289	0.648	9.07319e-07	0	ND-19
SdhB	3.72671e-14	0.400258	0.208	0.519	4.65466e-10	0	SdhB
SdhC	9.48253e-12	0.399032	0.276	0.63	1.18437e-07	0	SdhC
Cbp53E	3.423e-05	0.395156	0.281	0.488	0.427532	0	Cbp53E
UQCR-C1	9.48037e-08	0.388144	0.347	0.726	0.0011841	0	UQCR-C1
l(1)G0255	2.71379e-18	0.384616	0.171	0.489	3.38952e-14	0	l(1)G0255
Cyt-c1	2.37122e-11	0.383815	0.298	0.678	2.96165e-07	0	Cyt-c1
l(1)G0156	9.03713e-20	0.374523	0.191	0.541	1.12874e-15	0	l(1)G0156
DENR	4.82157e-17	0.370224	0.174	0.48	6.02215e-13	0	DENR
MCTS1	1.21758e-16	0.36702	0.225	0.579	1.52076e-12	0	MCTS1
ND-30	3.99723e-13	0.364638	0.198	0.487	4.99255e-09	0	ND-30
betaTub56D	2.01864e-09	0.361459	0.807	0.921	2.52128e-05	0	betaTub56D
kdn	1.47028e-16	0.350699	0.156	0.44	1.83638e-12	0	kdn
tko	5.10276e-13	0.347455	0.159	0.407	6.37335e-09	0	tko
mRpL12	2.67609e-18	0.346747	0.178	0.502	3.34243e-14	0	mRpL12
CG8860	1.70793e-20	0.336834	0.227	0.621	2.1332e-16	0	CG8860
ND-PDSW	6.72399e-08	0.333996	0.367	0.774	0.000839826	0	ND-PDSW
COX4	0.000145503	0.332695	0.663	0.939	1	0	COX4
CG34132	7.64856e-19	0.330745	0.225	0.6	9.55305e-15	0	CG34132
Cchl	6.74739e-17	0.32926	0.149	0.43	8.42749e-13	0	Cchl
UQCR-C2	5.24895e-10	0.32921	0.325	0.715	6.55593e-06	0	UQCR-C2
CG1307	2.63738e-20	0.328101	0.154	0.47	3.29409e-16	0	CG1307
CG5758	5.47526e-20	0.327733	0.127	0.415	6.8386e-16	0	CG5758
ND-ASHI	8.63066e-18	0.326353	0.249	0.642	1.07797e-13	0	ND-ASHI
Pgk	1.7678e-14	0.325945	0.213	0.526	2.20799e-10	0	Pgk
Idh3b	3.13872e-21	0.323719	0.181	0.532	3.92026e-17	0	Idh3b
CG42376	6.74866e-17	0.323689	0.127	0.387	8.42907e-13	0	CG42376
CG13220	7.58539e-17	0.322471	0.186	0.497	9.47416e-13	0	CG13220
Dad1	3.04499e-22	0.319919	0.203	0.586	3.80319e-18	0	Dad1
CG6195	8.67418e-12	0.319633	0.081	0.251	1.08341e-07	0	CG6195
CG7920	1.05912e-18	0.317569	0.174	0.491	1.32284e-14	0	CG7920
Drat	4.40248e-14	0.317224	0.301	0.716	5.4987e-10	0	Drat
Prosalpha6	2.88101e-21	0.315089	0.191	0.556	3.59838e-17	0	Prosalpha6
UQCR-14	0.0031068	0.314542	0.438	0.829	1	0	UQCR-14
ATPsynbeta	1.06273e-05	0.30829	0.726	0.951	0.132735	0	ATPsynbeta
ND-B14.5B	3.51764e-17	0.307544	0.252	0.638	4.39354e-13	0	ND-B14.5B
Rpn11	1.12634e-18	0.30683	0.115	0.381	1.4068e-14	0	Rpn11
TM4SF	1.46447e-13	0.305306	0.23	0.552	1.82912e-09	0	TM4SF
ATPsynF	5.63559e-07	0.304125	0.726	0.928	0.00703886	0	ATPsynF
Chchd2	2.18617e-19	0.30407	0.252	0.664	2.73052e-15	0	Chchd2
mRpL2	9.35652e-19	0.303204	0.115	0.382	1.16863e-14	0	mRpL2
Rtca	5.60398e-12	0.300878	0.088	0.266	6.99938e-08	0	Rtca
CG11752	8.49658e-17	0.299701	0.203	0.532	1.06122e-12	0	CG11752
mRpS7	4.61181e-15	0.297989	0.108	0.332	5.76015e-11	0	mRpS7
Tob	1.41573e-19	0.295541	0.21	0.575	1.76825e-15	0	Tob
mRpL21	1.64237e-19	0.29412	0.095	0.351	2.05132e-15	0	mRpL21
CG13365	2.46306e-20	0.294053	0.13	0.424	3.07637e-16	0	CG13365
CG11000	7.67025e-16	0.292043	0.117	0.358	9.58015e-12	0	CG11000
mRpL16	1.00639e-13	0.291783	0.103	0.309	1.25697e-09	0	mRpL16
Tom7	3.11893e-13	0.291311	0.313	0.722	3.89554e-09	0	Tom7
ND-42	2.46946e-20	0.290526	0.183	0.529	3.08436e-16	0	ND-42
ND-B12	1.2513e-09	0.28951	0.352	0.764	1.56287e-05	0	ND-B12
CG8397	7.69738e-17	0.288527	0.142	0.414	9.61403e-13	0	CG8397
ND-SGDH	4.00291e-23	0.286079	0.218	0.626	4.99963e-19	0	ND-SGDH
ND-MWFE	3.37786e-21	0.281366	0.244	0.659	4.21894e-17	0	ND-MWFE
gammaSnap1	1.3483e-19	0.281363	0.218	0.593	1.68402e-15	0	gammaSnap1
scu	1.48729e-13	0.280488	0.083	0.273	1.85762e-09	0	scu
CG1142	5.08216e-13	0.279398	0.086	0.271	6.34762e-09	0	CG1142
porin	0.000990127	0.27934	0.714	0.958	1	0	porin
CG43902	1.38344e-13	0.277954	0.208	0.486	1.72792e-09	0	CG43902
Pex19	5.14794e-16	0.273857	0.137	0.397	6.42978e-12	0	Pex19
Tpi	2.63335e-16	0.273485	0.159	0.44	3.28906e-12	0	Tpi
FKBP59	9.77738e-21	0.272616	0.232	0.629	1.22119e-16	0	FKBP59
Pfdn1	1.0023e-20	0.272243	0.144	0.455	1.25187e-16	0	Pfdn1
Scgalpha	6.12456e-20	0.271194	0.208	0.569	7.64957e-16	0	Scgalpha
CG8778	4.46046e-17	0.267813	0.12	0.375	5.57111e-13	0	CG8778
CG4287	1.83451e-18	0.266219	0.095	0.341	2.2913e-14	0	CG4287
CG1161	1.71246e-24	0.265712	0.164	0.524	2.13886e-20	0	CG1161
prel	1.06373e-19	0.265151	0.1	0.36	1.3286e-15	0	prel
Su(P)	1.84829e-13	0.26302	0.103	0.308	2.30851e-09	0	Su(P)
Rpn7	1.68168e-18	0.26297	0.112	0.375	2.10042e-14	0	Rpn7
Mtch	4.69452e-23	0.26288	0.147	0.48	5.86345e-19	0	Mtch
CG11699	6.68209e-26	0.262031	0.2	0.613	8.34592e-22	0	CG11699
Hasp	7.29034e-21	0.261362	0.174	0.512	9.10564e-17	0	Hasp
Btk29A	1.19202e-21	0.260304	0.237	0.653	1.48883e-17	0	Btk29A
Scgbeta	9.27302e-25	0.259649	0.22	0.643	1.1582e-20	0	Scgbeta
ND-15	5.28472e-17	0.255812	0.293	0.723	6.60061e-13	0	ND-15
path	4.95619e-18	0.255744	0.125	0.393	6.19028e-14	0	path
Nap1	4.16525e-21	0.255726	0.169	0.507	5.20239e-17	0	Nap1
CG11876	8.85899e-24	0.255609	0.166	0.525	1.10649e-19	0	CG11876
Rpn8	5.36617e-21	0.255402	0.125	0.42	6.70235e-17	0	Rpn8
unc79	3.20948e-22	0.254887	0.22	0.621	4.00864e-18	0	unc79
Dak1	8.36471e-22	0.253842	0.193	0.562	1.04475e-17	0	Dak1
Men-b	7.3479e-17	0.252272	0.078	0.295	9.17752e-13	0	Men-b
CG15891	1.13242e-12	0.25176	0.086	0.268	1.41439e-08	0	CG15891
IscU	4.4395e-18	0.251472	0.259	0.668	5.54494e-14	0	IscU
CG8004	1.54691e-12	0.251119	0.078	0.253	1.93208e-08	0	CG8004
Torsin	3.27452e-13	0.250703	0.076	0.256	4.08988e-09	0	Torsin
CG14989	2.73163e-33	1.34553	0.455	0.198	3.41181e-29	1	CG14989
Abd-B	5.51492e-103	1.25755	0.354	0.054	6.88813e-99	1	Abd-B
Imp	4.05709e-290	1.25056	0.901	0.129	5.06731e-286	1	Imp
Scp2	1.18235e-43	1.20281	0.408	0.131	1.47676e-39	1	Scp2
abd-A	0	1.15226	0.439	0.004	0	1	abd-A
Ubx	5.2995e-106	0.847151	0.29	0.033	6.61907e-102	1	Ubx
dsx	2.75215e-68	0.805818	0.303	0.056	3.43743e-64	1	dsx
Wnt4	1.08739e-37	0.776679	0.376	0.125	1.35815e-33	1	Wnt4
hth1	5.61752e-27	0.749882	0.803	0.521	7.01628e-23	1	hth
Gad1	3.75473e-48	0.70035	0.334	0.088	4.68965e-44	1	Gad1
Hsp23	3.67302e-50	0.681993	0.994	0.82	4.5876e-46	1	Hsp23
Cbp53E1	8.76323e-31	0.666307	0.777	0.465	1.09453e-26	1	Cbp53E
Cyt-c-p	2.05137e-63	0.61488	0.981	0.801	2.56216e-59	1	Cyt-c-p
Antp	8.58757e-75	0.587447	0.322	0.055	1.07259e-70	1	Antp
CG3402	4.518e-63	0.579084	0.873	0.466	5.64299e-59	1	CG3402
tsh	4.39623e-75	0.535666	0.411	0.089	5.4909e-71	1	tsh
mamo	4.39484e-36	0.533837	0.86	0.498	5.48916e-32	1	mamo
Pglym78	9.1742e-51	0.528337	0.85	0.473	1.14586e-46	1	Pglym78
mbl1	2.31934e-09	0.526853	0.882	0.684	2.89685e-05	1	mbl
salr	1.98772e-29	0.500451	0.268	0.084	2.48267e-25	1	salr
zfh2	8.52696e-35	0.480468	0.28	0.079	1.06502e-30	1	zfh2
sesB	4.2957e-52	0.475716	0.984	0.884	5.36533e-48	1	sesB
Eno	4.9765e-36	0.458484	0.889	0.576	6.21565e-32	1	Eno
fabp	4.52388e-33	0.451047	0.965	0.835	5.65033e-29	1	fabp
Ald	4.16387e-40	0.440091	0.847	0.498	5.20067e-36	1	Ald
Rbp6	1.33175e-22	0.427041	0.968	0.843	1.66336e-18	1	Rbp6
cpx	9.81415e-34	0.421424	0.99	0.916	1.22579e-29	1	cpx
Gapdh1	6.45868e-34	0.420634	0.822	0.478	8.06689e-30	1	Gapdh1
Pgk1	9.00806e-41	0.41763	0.876	0.495	1.12511e-36	1	Pgk
Gapdh2	6.46154e-36	0.41371	0.943	0.755	8.07046e-32	1	Gapdh2
slgA	8.67966e-34	0.411353	0.93	0.644	1.08409e-29	1	slgA
Blimp-1	4.75318e-42	0.406612	0.812	0.391	5.93672e-38	1	Blimp-1
VGAT	2.13536e-65	0.39544	0.471	0.123	2.66706e-61	1	VGAT
hdc	1.10215e-09	0.392097	0.71	0.51	1.37659e-05	1	hdc
igl	2.51172e-15	0.38568	0.939	0.694	3.13714e-11	1	igl
CG57581	1.77509e-39	0.377657	0.758	0.386	2.21709e-35	1	CG5758
fwe	1.95705e-42	0.372117	0.879	0.453	2.44436e-38	1	fwe
nemy	1.47105e-25	0.371536	0.793	0.473	1.83735e-21	1	nemy
CG112671	5.2545e-28	0.366754	0.911	0.693	6.56287e-24	1	CG11267
Hsp67Ba	2.04079e-29	0.36412	0.962	0.664	2.54895e-25	1	Hsp67Ba
CG10804	4.62519e-33	0.362541	0.653	0.313	5.77686e-29	1	CG10804
Sap47	4.15798e-29	0.359202	0.975	0.86	5.19331e-25	1	Sap47
CG14757	3.7117e-80	0.358652	0.363	0.067	4.63592e-76	1	CG14757
Msp300	2.36304e-30	0.358259	0.99	0.843	2.95144e-26	1	Msp300
Calx	9.37183e-27	0.357849	0.882	0.588	1.17054e-22	1	Calx
CG31808	1.07997e-51	0.357151	0.446	0.135	1.34889e-47	1	CG31808
Mp	4.4371e-25	0.354566	0.901	0.622	5.54194e-21	1	Mp
UQCR-Q	1.6542e-28	0.35104	0.955	0.811	2.0661e-24	1	UQCR-Q
Tpi1	5.33521e-39	0.346852	0.809	0.41	6.66368e-35	1	Tpi
TM4SF1	1.84605e-33	0.346265	0.898	0.52	2.30571e-29	1	TM4SF
Lim1	1.37629e-16	0.345652	0.331	0.155	1.71899e-12	1	Lim1
tsr	1.9076e-24	0.344831	0.968	0.857	2.38259e-20	1	tsr
Gdi	1.81669e-26	0.342323	0.927	0.692	2.26905e-22	1	Gdi
P5CDh1	1.48318e-39	0.340073	0.631	0.272	1.85249e-35	1	P5CDh1
UQCR-141	7.36234e-30	0.334358	0.965	0.802	9.19557e-26	1	UQCR-14
14-3-3zeta	1.84683e-52	0.334048	1	0.964	2.30669e-48	1	14-3-3zeta
CG32225	1.65645e-55	0.328593	0.529	0.163	2.06891e-51	1	CG32225
Hasp1	5.15017e-37	0.327248	0.873	0.479	6.43256e-33	1	Hasp
CG6330	2.79414e-43	0.327062	0.58	0.222	3.48988e-39	1	CG6330
blw	8.42579e-32	0.321709	0.99	0.91	1.05238e-27	1	blw
Neb-cGP	4.70335e-24	0.318637	0.959	0.836	5.87448e-20	1	Neb-cGP
Dak11	8.15198e-28	0.318147	0.866	0.53	1.01818e-23	1	Dak1
fend	3.67592e-21	0.317574	0.882	0.596	4.59123e-17	1	fend
UQCR-6.4	2.06594e-22	0.311251	0.946	0.718	2.58036e-18	1	UQCR-6.4
sun	6.01656e-25	0.310115	0.952	0.789	7.51468e-21	1	sun
beat-Vc	2.05492e-18	0.30992	0.49	0.255	2.5666e-14	1	beat-Vc
CG341321	3.95687e-26	0.307114	0.847	0.57	4.94213e-22	1	CG34132
COX5B	1.15769e-22	0.30656	0.939	0.811	1.44596e-18	1	COX5B
Gabat	2.00209e-28	0.306285	0.803	0.463	2.50061e-24	1	Gabat
CG13108	1.50177e-24	0.305127	0.895	0.579	1.87572e-20	1	CG13108
Ssb-c31a	4.53749e-20	0.302907	0.841	0.584	5.66732e-16	1	Ssb-c31a
Dic11	6.22305e-35	0.301569	0.621	0.285	7.77259e-31	1	Dic1
nwk	1.26965e-29	0.30118	0.803	0.43	1.58579e-25	1	nwk
QIL1	1.41795e-26	0.300559	0.803	0.478	1.77102e-22	1	QIL1
Glo1	1.94193e-35	0.298679	0.58	0.242	2.42547e-31	1	Glo1
IscU1	4.58622e-24	0.293208	0.892	0.637	5.72819e-20	1	IscU
kcc	4.58815e-24	0.293071	0.841	0.513	5.7306e-20	1	kcc
kdn1	2.54034e-28	0.288031	0.752	0.412	3.17289e-24	1	kdn
ATPsynCF6	3.31992e-27	0.286829	0.978	0.884	4.14658e-23	1	ATPsynCF6
Ssadh	1.04129e-30	0.286	0.436	0.172	1.30057e-26	1	Ssadh
CG6878	5.91223e-29	0.283386	0.787	0.43	7.38437e-25	1	CG6878
COX8	1.66811e-18	0.283365	0.959	0.817	2.08347e-14	1	COX8
Rab3	3.48719e-25	0.282749	0.828	0.521	4.3555e-21	1	Rab3
ATPsynF1	2.41148e-21	0.279964	0.984	0.915	3.01194e-17	1	ATPsynF
ND-13A	8.05196e-22	0.279216	0.908	0.62	1.00569e-17	1	ND-13A
PyK	2.4841e-54	0.273188	0.522	0.158	3.10265e-50	1	PyK
app	6.78371e-18	0.272517	0.494	0.263	8.47285e-14	1	app
cype	8.69062e-27	0.26872	0.994	0.918	1.08546e-22	1	cype
Mdh1	2.65547e-30	0.268587	0.669	0.317	3.31668e-26	1	Mdh1
CG42342	1.08059e-17	0.267723	0.809	0.522	1.34966e-13	1	CG42342
CG5903	1.17463e-20	0.266824	0.892	0.612	1.46712e-16	1	CG5903
Nnf1a	2.65524e-43	0.266054	0.452	0.146	3.31639e-39	1	Nnf1a
CG9919	5.36125e-21	0.265827	0.955	0.752	6.6962e-17	1	CG9919
ATPsynB	9.74655e-20	0.26574	0.968	0.874	1.21735e-15	1	ATPsynB
Tom20	5.70677e-23	0.261154	0.901	0.63	7.12775e-19	1	Tom20
ND-301	1.34874e-21	0.258781	0.793	0.459	1.68457e-17	1	ND-30
CG42346	1.00283e-19	0.258284	0.529	0.273	1.25254e-15	1	CG42346
chrb	1.47075e-11	0.256846	0.978	0.872	1.83697e-07	1	chrb
Vha26	1.46732e-20	0.254899	0.904	0.649	1.83268e-16	1	Vha26
Sod1	5.67345e-19	0.254637	0.946	0.839	7.08615e-15	1	Sod1
Cad87A	6.93374e-32	0.253691	0.36	0.124	8.66024e-28	1	Cad87A
ND-B14.7	1.18202e-20	0.252879	0.812	0.506	1.47634e-16	1	ND-B14.7
CG45781	5.59767e-25	0.252423	0.287	0.097	6.99149e-21	1	CG45781
COX7C	1.0964e-14	0.252252	0.955	0.866	1.36941e-10	1	COX7C
nrv3	4.65179e-39	0.251934	0.997	0.986	5.81009e-35	1	nrv3
Nckx30C	8.73117e-16	0.251293	0.968	0.838	1.09052e-11	1	Nckx30C
SPoCk	1.85986e-20	0.250903	0.79	0.478	2.32297e-16	1	SPoCk
Bx	3.94941e-183	1.48921	0.987	0.362	4.93281e-179	2	Bx
bi	2.27836e-185	1.16117	0.977	0.264	2.84567e-181	2	bi
CG6959	4.95456e-114	1.10044	0.871	0.388	6.18824e-110	2	CG6959
kune	1.88122e-134	1.07969	0.836	0.302	2.34964e-130	2	kune
CG31676	6.95356e-130	1.07266	0.826	0.246	8.685e-126	2	CG31676
toy	1.3618e-122	1.00027	0.981	0.419	1.70089e-118	2	toy
CG31221	1.7542e-109	0.998378	0.997	0.6	2.191e-105	2	CG31221
DIP-beta	2.25526e-152	0.987762	0.817	0.211	2.81681e-148	2	DIP-beta
Ca-alpha1T	1.41824e-108	0.985438	0.952	0.51	1.77138e-104	2	Ca-alpha1T
ct	6.25645e-136	0.967834	0.855	0.24	7.81431e-132	2	ct
CG3726	9.9699e-102	0.926981	0.875	0.374	1.24524e-97	2	CG3726
CR45758	8.46754e-76	0.878199	0.929	0.663	1.0576e-71	2	CR45758
CG30419	7.09506e-97	0.876425	0.714	0.253	8.86173e-93	2	CG30419
Trim9	5.81343e-88	0.867833	0.904	0.479	7.26098e-84	2	Trim9
CG32982	2.26738e-81	0.760561	0.836	0.397	2.83196e-77	2	CG32982
beat-IIIb	6.09969e-67	0.712082	0.887	0.497	7.61851e-63	2	beat-IIIb
CG14459	9.7834e-103	0.71162	0.74	0.2	1.22195e-98	2	CG14459
CG31324	9.0787e-59	0.686945	0.65	0.282	1.13393e-54	2	CG31324
hbs	3.44696e-58	0.684604	0.701	0.335	4.30526e-54	2	hbs
ap	4.93473e-81	0.684163	0.743	0.242	6.16348e-77	2	ap
CG10384	4.13843e-53	0.676192	0.768	0.409	5.1689e-49	2	CG10384
nrm	4.28147e-52	0.653614	0.913	0.678	5.34755e-48	2	nrm
Tet	4.22162e-84	0.648438	0.994	0.863	5.27281e-80	2	Tet
CR43492	8.83089e-202	0.641499	0.36	0.025	1.10298e-197	2	CR43492
AstC-R1	2.73857e-54	0.640353	0.534	0.198	3.42048e-50	2	AstC-R1
CG13579	5.59563e-73	0.636576	0.495	0.14	6.98894e-69	2	CG13579
luna	1.30395e-56	0.636254	0.949	0.666	1.62863e-52	2	luna
pasi2	3.75681e-55	0.631792	0.646	0.305	4.69225e-51	2	pasi2
put	3.66912e-29	0.608302	0.582	0.358	4.58273e-25	2	put
sosie	1.2448e-84	0.606135	0.267	0.035	1.55475e-80	2	sosie
rdgA	2.02232e-61	0.594759	0.987	0.664	2.52587e-57	2	rdgA
CG33111	6.37663e-43	0.594538	0.299	0.083	7.96441e-39	2	CG33111
GABA-B-R3	5.82717e-45	0.590181	0.495	0.2	7.27813e-41	2	GABA-B-R3
Ptp99A	3.49899e-68	0.583643	0.997	0.855	4.37024e-64	2	Ptp99A
Syp	1.11709e-70	0.578332	0.997	0.913	1.39525e-66	2	Syp
CG12484	7.92016e-49	0.577288	0.608	0.271	9.89228e-45	2	CG12484
CG6583	1.3556e-48	0.566282	0.531	0.222	1.69314e-44	2	CG6583
mspo	4.2282e-53	0.565944	0.897	0.594	5.28102e-49	2	mspo
Argk	7.92459e-60	0.559524	0.981	0.884	9.89781e-56	2	Argk
sky	6.7984e-42	0.550932	0.83	0.562	8.4912e-38	2	sky
CG31637	8.2896e-50	0.54317	0.823	0.51	1.03537e-45	2	CG31637
ham	2.83012e-75	0.541867	0.678	0.201	3.53482e-71	2	ham
Hsp27	6.62156e-32	0.531354	0.865	0.656	8.27032e-28	2	Hsp27
bru1	1.47126e-46	0.528958	0.601	0.262	1.83761e-42	2	bru1
beat-Vc1	4.18747e-34	0.527146	0.521	0.254	5.23015e-30	2	beat-Vc
wry	8.04964e-44	0.525742	0.878	0.593	1.0054e-39	2	wry
Tsp66E	1.72812e-56	0.522481	0.987	0.826	2.15843e-52	2	Tsp66E
CG42594	4.50551e-41	0.517698	0.768	0.451	5.62738e-37	2	CG42594
trn	1.49266e-41	0.512619	0.804	0.473	1.86433e-37	2	trn
CG33143	3.16508e-30	0.503023	0.791	0.569	3.95319e-26	2	CG33143
Bacc	3.95114e-80	0.491521	1	0.974	4.93498e-76	2	Bacc
Nna1	3.38318e-52	0.488803	0.344	0.087	4.22559e-48	2	Nna1
CG17124	1.31022e-52	0.482935	0.994	0.823	1.63647e-48	2	CG17124
CG43737	1.27327e-51	0.479714	0.99	0.745	1.59031e-47	2	CG43737
Hsp26	4.34461e-46	0.469745	0.974	0.85	5.42642e-42	2	Hsp26
Teh1	8.43473e-36	0.46813	0.81	0.552	1.0535e-31	2	Teh1
crim	1.31599e-32	0.467548	0.437	0.195	1.64368e-28	2	crim
chinmo	1.33757e-50	0.465543	0.99	0.895	1.67062e-46	2	chinmo
CG16817	2.44311e-43	0.46486	0.932	0.761	3.05144e-39	2	CG16817
CG42313	7.22354e-37	0.464129	0.971	0.72	9.02221e-33	2	CG42313
klg	5.62197e-57	0.45314	1	0.757	7.02184e-53	2	klg
Nurf-38	1.05867e-34	0.452565	0.817	0.588	1.32228e-30	2	Nurf-38
CG8498	1.69109e-38	0.449844	0.936	0.773	2.11218e-34	2	CG8498
HmgD	5.29245e-38	0.447569	0.9	0.707	6.61027e-34	2	HmgD
Dat	4.69391e-32	0.441539	0.723	0.402	5.8627e-28	2	Dat
CG3967	9.62386e-23	0.438781	0.762	0.59	1.20202e-18	2	CG3967
CG8641	1.87778e-24	0.4385	0.502	0.267	2.34535e-20	2	CG8641
Ggamma30A	1.20709e-74	0.433668	1	0.979	1.50766e-70	2	Ggamma30A
nAChRbeta2	2.25996e-34	0.428471	0.887	0.709	2.82269e-30	2	nAChRbeta2
CG42747	2.16679e-37	0.426403	0.421	0.158	2.70632e-33	2	CG42747
14-3-3epsilon	5.12929e-70	0.419045	0.997	0.982	6.40648e-66	2	14-3-3epsilon
lbk	1.89893e-26	0.410235	0.73	0.519	2.37177e-22	2	lbk
snRNA:7SK	1.83589e-17	0.408732	0.704	0.562	2.29302e-13	2	snRNA:7SK
CG5446	1.54315e-23	0.406224	0.714	0.527	1.92739e-19	2	CG5446
pasi1	7.70923e-30	0.406031	0.318	0.118	9.62883e-26	2	pasi1
VhaAC45	1.37159e-22	0.404131	0.637	0.439	1.71312e-18	2	VhaAC45
nAChRalpha2	1.12294e-22	0.398257	0.678	0.476	1.40255e-18	2	nAChRalpha2
M6	1.25859e-17	0.397496	0.473	0.302	1.57198e-13	2	M6
CG10283	1.51356e-19	0.395858	0.36	0.181	1.89044e-15	2	CG10283
plx	8.67255e-22	0.395348	0.621	0.419	1.0832e-17	2	plx
CG43759	8.18517e-27	0.393103	0.656	0.387	1.02233e-22	2	CG43759
GFP	2.27243e-27	0.391004	0.92	0.74	2.83827e-23	2	GFP
TyrR	2.94582e-17	0.390935	0.363	0.19	3.67933e-13	2	TyrR
CG9650	3.43144e-57	0.389112	0.711	0.251	4.28587e-53	2	CG9650
CG31075	1.39935e-18	0.386204	0.431	0.256	1.74779e-14	2	CG31075
Hsp67Bc	6.07749e-64	0.383115	1	0.989	7.59078e-60	2	Hsp67Bc
ATPsynbeta1	6.67699e-40	0.377602	0.99	0.938	8.33955e-36	2	ATPsynbeta
dpr10	2.02319e-23	0.377415	0.514	0.276	2.52697e-19	2	dpr10
Akap200	1.38979e-21	0.376746	0.804	0.645	1.73585e-17	2	Akap200
rgn	2.87951e-28	0.376302	0.707	0.422	3.5965e-24	2	rgn
Pvf3	1.14395e-38	0.373561	0.952	0.651	1.4288e-34	2	Pvf3
Rpt3	3.12571e-17	0.366522	0.695	0.567	3.90401e-13	2	Rpt3
RabX4	2.35235e-13	0.366028	0.614	0.495	2.93808e-09	2	RabX4
CG11444	1.7321e-18	0.365809	0.585	0.41	2.1634e-14	2	CG11444
CCT4	2.23741e-17	0.364181	0.633	0.487	2.79452e-13	2	CCT4
CG13920	7.03616e-43	0.36347	0.99	0.917	8.78817e-39	2	CG13920
pyd	1.65542e-24	0.354712	0.695	0.441	2.06763e-20	2	pyd
p120ctn	1.74877e-30	0.353622	0.974	0.827	2.18422e-26	2	p120ctn
CG3689	4.70904e-20	0.352249	0.733	0.58	5.88159e-16	2	CG3689
l(3)neo38	2.00238e-19	0.34878	0.601	0.386	2.50097e-15	2	l(3)neo38
CG14082	3.0679e-24	0.346899	0.453	0.221	3.83181e-20	2	CG14082
Set	2.05638e-20	0.346066	0.711	0.523	2.56842e-16	2	Set
Uch	1.35386e-15	0.343398	0.502	0.336	1.69097e-11	2	Uch
hig	2.89745e-13	0.34289	0.495	0.329	3.61892e-09	2	hig
Hsc70-4	5.46449e-27	0.342391	0.961	0.883	6.82515e-23	2	Hsc70-4
alphaTub84B	2.54023e-29	0.341295	1	0.974	3.17275e-25	2	alphaTub84B
cold	2.37183e-20	0.340411	0.331	0.156	2.96241e-16	2	cold
dpr3	3.34159e-16	0.338595	0.428	0.246	4.17365e-12	2	dpr3
CG14464	7.22457e-21	0.338097	0.904	0.73	9.02348e-17	2	CG14464
CG32772	4.23655e-17	0.334643	0.63	0.469	5.29146e-13	2	CG32772
noc	1.17986e-14	0.334088	0.476	0.317	1.47365e-10	2	noc
Fas3	5.11049e-36	0.333853	0.81	0.43	6.383e-32	2	Fas3
Su(var)205	5.08407e-20	0.331807	0.881	0.764	6.35e-16	2	Su(var)205
CG12279	4.07043e-15	0.33125	0.627	0.481	5.08397e-11	2	CG12279
CG40228	1.54068e-19	0.33021	0.91	0.795	1.92431e-15	2	CG40228
emc	3.32856e-25	0.329387	0.836	0.586	4.15738e-21	2	emc
Lac	7.3904e-19	0.328597	0.379	0.182	9.23061e-15	2	Lac
Lar	9.91794e-28	0.328159	0.971	0.887	1.23875e-23	2	Lar
cib	7.60856e-18	0.327361	0.83	0.694	9.50309e-14	2	cib
Fili	3.35892e-15	0.324595	0.431	0.262	4.19529e-11	2	Fili
Eip78C	5.48393e-22	0.321116	0.881	0.723	6.84943e-18	2	Eip78C
CG1764	1.24753e-17	0.320996	0.711	0.559	1.55817e-13	2	CG1764
nrv2	1.23811e-17	0.320291	0.804	0.639	1.5464e-13	2	nrv2
CG42750	8.01328e-27	0.319687	0.846	0.581	1.00086e-22	2	CG42750
Atox1	2.70331e-29	0.318457	0.997	0.909	3.37643e-25	2	Atox1
Nph	5.22981e-12	0.316555	0.595	0.473	6.53203e-08	2	Nph
Mgstl	4.12595e-16	0.316312	0.376	0.207	5.15331e-12	2	Mgstl
CG10077	1.26856e-21	0.315639	0.958	0.854	1.58443e-17	2	CG10077
glec	1.74866e-16	0.31474	0.659	0.484	2.18408e-12	2	glec
schlank	9.30812e-19	0.31409	0.794	0.679	1.16258e-14	2	schlank
Eip75B	4.19368e-21	0.313734	0.887	0.721	5.23791e-17	2	Eip75B
CG10257	7.06838e-33	0.310093	0.264	0.073	8.82841e-29	2	CG10257
MED7	9.6643e-12	0.31005	0.614	0.503	1.20707e-07	2	MED7
CG14762	7.13151e-17	0.309944	0.678	0.471	8.90726e-13	2	CG14762
pck	2.00981e-17	0.306144	0.305	0.143	2.51026e-13	2	pck
CG423761	1.56978e-12	0.305778	0.505	0.369	1.96065e-08	2	CG42376
CG34383	1.35128e-24	0.305086	0.894	0.688	1.68774e-20	2	CG34383
beat-VI	2.31361e-24	0.303958	0.775	0.472	2.8897e-20	2	beat-VI
BI-1	8.49704e-18	0.303802	0.862	0.712	1.06128e-13	2	BI-1
RapGAP1	6.44612e-23	0.302886	0.923	0.767	8.05121e-19	2	RapGAP1
endos	3.07444e-13	0.302388	0.662	0.547	3.83998e-09	2	endos
Fs(2)Ket	1.82148e-10	0.301229	0.531	0.417	2.27503e-06	2	Fs(2)Ket
bma	2.5029e-21	0.301004	0.473	0.244	3.12613e-17	2	bma
CG15097	1.50688e-10	0.300608	0.395	0.275	1.88209e-06	2	CG15097
CG33170	1.55862e-13	0.300311	0.727	0.594	1.94671e-09	2	CG33170
CG17454	1.58658e-20	0.299184	0.878	0.75	1.98164e-16	2	CG17454
mGluR	1.60546e-18	0.299136	0.527	0.308	2.00522e-14	2	mGluR
CG5516	1.11613e-11	0.297509	0.531	0.412	1.39405e-07	2	CG5516
Cont	8.96904e-15	0.295439	0.264	0.126	1.12023e-10	2	Cont
Frq2	2.19721e-18	0.294206	0.817	0.637	2.74431e-14	2	Frq2
Sh3beta	1.90834e-14	0.288572	0.678	0.541	2.38352e-10	2	Sh3beta
TMS1	6.53273e-19	0.288326	0.83	0.677	8.15939e-15	2	TMS1
PMP34	2.09449e-12	0.288121	0.55	0.422	2.61602e-08	2	PMP34
BuGZ	8.75193e-10	0.287695	0.595	0.516	1.09312e-05	2	BuGZ
Nrt	5.97553e-20	0.286836	0.814	0.664	7.46344e-16	2	Nrt
Prosbeta1	6.93726e-16	0.284945	0.759	0.606	8.66464e-12	2	Prosbeta1
CG15628	3.64087e-14	0.284793	0.682	0.537	4.54745e-10	2	CG15628
RnpS1	6.50228e-14	0.28476	0.502	0.353	8.12135e-10	2	RnpS1
CG31460	1.10567e-09	0.284429	0.518	0.411	1.38098e-05	2	CG31460
mRpS10	3.49851e-12	0.283782	0.563	0.436	4.36963e-08	2	mRpS10
beat-IV	8.56183e-15	0.283264	0.463	0.29	1.06937e-10	2	beat-IV
Scgalpha1	8.36644e-15	0.281084	0.698	0.544	1.04497e-10	2	Scgalpha
Arpc5	1.58776e-11	0.280569	0.605	0.484	1.98311e-07	2	Arpc5
Rpn10	9.91823e-16	0.280101	0.598	0.433	1.23879e-11	2	Rpn10
AstC-R2	4.59483e-26	0.279637	0.672	0.392	5.73894e-22	2	AstC-R2
Arl4	2.50002e-15	0.279321	0.849	0.735	3.12253e-11	2	Arl4
CG4101	1.91931e-18	0.278931	0.887	0.759	2.39721e-14	2	CG4101
CG14883	3.6706e-08	0.27872	0.428	0.331	0.000458458	2	CG14883
CG3226	1.84128e-12	0.278242	0.508	0.366	2.29976e-08	2	CG3226
CG43658	2.53775e-38	0.277655	0.904	0.556	3.16965e-34	2	CG43658
Hel25E	2.1246e-13	0.277169	0.704	0.584	2.65362e-09	2	Hel25E
CG8209	1.77569e-10	0.276726	0.576	0.467	2.21784e-06	2	CG8209
Snoo	2.35219e-13	0.272572	0.65	0.489	2.93789e-09	2	Snoo
Efa6	6.13769e-08	0.271651	0.466	0.374	0.000766597	2	Efa6
dpr15	2.41184e-12	0.271502	0.418	0.266	3.01239e-08	2	dpr15
PIP4K	3.67387e-12	0.270117	0.701	0.586	4.58866e-08	2	PIP4K
CG17721	2.96012e-09	0.269901	0.26	0.155	3.69719e-05	2	CG17721
Mis12	4.67611e-13	0.269363	0.63	0.492	5.84046e-09	2	Mis12
tsu	2.08278e-11	0.268777	0.588	0.468	2.60139e-07	2	tsu
Hr4	2.90704e-26	0.268117	0.987	0.891	3.6309e-22	2	Hr4
Txl	2.03096e-10	0.268048	0.383	0.262	2.53667e-06	2	Txl
CG15118	4.46538e-07	0.267448	0.296	0.204	0.00557727	2	CG15118
betaTub56D1	2.48425e-15	0.267387	0.994	0.912	3.10283e-11	2	betaTub56D
Vps24	5.56278e-11	0.267268	0.556	0.437	6.94791e-07	2	Vps24
Prosbeta3	1.87235e-12	0.265975	0.746	0.614	2.33856e-08	2	Prosbeta3
trsn	1.99485e-08	0.264089	0.412	0.315	0.000249157	2	trsn
Pabp2	7.48118e-08	0.262946	0.534	0.454	0.0009344	2	Pabp2
lawc1	1.02183e-09	0.262165	0.608	0.516	1.27626e-05	2	lawc
CG8300	2.54664e-12	0.261851	0.511	0.366	3.18076e-08	2	CG8300
vig2	2.55031e-16	0.261507	0.788	0.619	3.18533e-12	2	vig2
caps	4.09465e-17	0.260205	0.746	0.535	5.11421e-13	2	caps
SF2	3.98238e-12	0.259465	0.733	0.64	4.97399e-08	2	SF2
Rab11	4.27782e-13	0.258651	0.768	0.648	5.34299e-09	2	Rab11
Sep2	4.23248e-13	0.258517	0.752	0.629	5.28637e-09	2	Sep2
mamo1	3.51135e-29	0.258193	0.881	0.497	4.38568e-25	2	mamo
CG4882	1.36448e-08	0.258006	0.331	0.223	0.000170423	2	CG4882
SelR	3.93835e-08	0.257115	0.486	0.397	0.0004919	2	SelR
Oscillin	1.54545e-06	0.257112	0.309	0.227	0.0193027	2	Oscillin
elB	4.25635e-12	0.256658	0.534	0.38	5.31619e-08	2	elB
Rpn6	3.52845e-08	0.255767	0.447	0.351	0.000440704	2	Rpn6
Mmp2	8.26705e-15	0.255194	0.46	0.285	1.03256e-10	2	Mmp2
CG10465	4.92296e-08	0.254669	0.453	0.357	0.000614877	2	CG10465
Sem1	5.25467e-09	0.254581	0.582	0.489	6.56308e-05	2	Sem1
CG17202	1.25239e-10	0.253918	0.453	0.327	1.56423e-06	2	CG17202
CaMKI	6.98561e-12	0.253169	0.756	0.637	8.72502e-08	2	CaMKI
CkIIalpha	4.06525e-16	0.253114	0.839	0.697	5.0775e-12	2	CkIIalpha
Prosbeta2	5.26433e-12	0.252942	0.775	0.648	6.57515e-08	2	Prosbeta2
Prosalpha7	4.52397e-10	0.252303	0.656	0.558	5.65044e-06	2	Prosalpha7
sqh	8.22394e-12	0.252131	0.688	0.581	1.02717e-07	2	sqh
Tlk	1.74952e-13	0.251938	0.846	0.747	2.18515e-09	2	Tlk
CSN5	8.09699e-08	0.251587	0.389	0.296	0.00101132	2	CSN5
Act42A	4.14505e-18	0.251285	0.974	0.844	5.17717e-14	2	Act42A
Jwa	5.22905e-10	0.251211	0.569	0.462	6.53109e-06	2	Jwa
rump	2.37642e-07	0.25094	0.463	0.389	0.00296814	2	rump
CG15237	3.70681e-10	0.250278	0.521	0.404	4.62981e-06	2	CG15237
Sep4	9.10802e-09	0.250134	0.588	0.498	0.000113759	2	Sep4
CG2269	1.55449e-06	1.38275	0.496	0.549	0.0194156	3	CG2269
PMCA	6.01452e-43	1.26235	0.816	0.886	7.51213e-39	3	PMCA
kcc1	1.80707e-16	1.25132	0.548	0.526	2.25704e-12	3	kcc
CG437371	2.57812e-26	1.17747	0.736	0.755	3.22007e-22	3	CG43737
7B2	4.39683e-25	1.17454	0.792	0.873	5.49164e-21	3	7B2
Cals	8.89524e-23	1.15731	0.684	0.808	1.11102e-18	3	Cals
CG423421	1.71815e-16	1.15555	0.604	0.531	2.14597e-12	3	CG42342
Hasp2	3.38001e-08	1.14266	0.472	0.495	0.000422163	3	Hasp
CG57582	0.00146423	1.14067	0.368	0.401	1	3	CG5758
Mp1	1.93392e-11	1.13399	0.6	0.634	2.41546e-07	3	Mp
CG9813	0.00212962	1.12782	0.344	0.362	1	3	CG9813
CG15765	0.000176143	1.09941	0.504	0.599	1	3	CG15765
NUCB1	9.98941e-11	1.05327	0.556	0.654	1.24768e-06	3	NUCB1
Pvf31	2.7596e-07	1.0318	0.612	0.665	0.00344674	3	Pvf3
PlexA	9.55429e-12	1.00524	0.588	0.709	1.19333e-07	3	PlexA
CadN	3.87698e-32	1.00022	0.772	0.854	4.84235e-28	3	CadN
Calr	5.87753e-24	0.990663	0.776	0.854	7.34104e-20	3	Calr
Hsc70-3	9.11356e-08	0.970869	0.548	0.676	0.00113828	3	Hsc70-3
Fas2	0.00912236	0.96987	0.428	0.488	1	3	Fas2
ed	0.000517571	0.9463	0.416	0.458	1	3	ed
Nrx-1	6.68808e-19	0.913569	0.664	0.761	8.35341e-15	3	Nrx-1
klg1	1.81269e-24	0.913446	0.856	0.763	2.26405e-20	3	klg
Atpalpha	1.52209e-79	0.899061	0.988	0.989	1.90109e-75	3	Atpalpha
CG4587	8.09851e-26	0.895493	0.796	0.903	1.0115e-21	3	CG4587
fred	1.49566e-05	0.894624	0.516	0.572	0.186808	3	fred
Cow	1.34632e-06	0.89004	0.552	0.653	0.0168155	3	Cow
CG42492	1.45272e-61	0.885273	0.976	0.974	1.81444e-57	3	CG42492
SP2353	0.000122146	0.87976	0.492	0.617	1	3	SP2353
Appl	2.23406e-28	0.845517	0.804	0.901	2.79034e-24	3	Appl
schlank1	0.000351207	0.837572	0.508	0.689	1	3	schlank
CG42817	0.0014299	0.830555	0.432	0.517	1	3	CG42817
Con	5.43321e-08	0.824249	0.596	0.603	0.000678608	3	Con
GluRIB	0.00546832	0.820334	0.456	0.538	1	3	GluRIB
CG17716	6.94203e-08	0.808957	0.564	0.594	0.000867059	3	CG17716
TMS11	0.00294338	0.789978	0.5	0.689	1	3	TMS1
pros	1.48817e-09	0.782201	0.808	0.783	1.85873e-05	3	pros
Ptp99A1	1.65231e-16	0.778731	0.784	0.862	2.06373e-12	3	Ptp99A
GABA-B-R1	0.00129118	0.770973	0.528	0.732	1	3	GABA-B-R1
CG99191	1.44679e-13	0.762737	0.664	0.763	1.80704e-09	3	CG9919
Lamp1	0.000209774	0.753141	0.532	0.737	1	3	Lamp1
nrv31	5.97485e-37	0.730276	0.992	0.986	7.46259e-33	3	nrv3
CG42265	1.09886e-08	0.704112	0.592	0.738	0.000137247	3	CG42265
Ten-a	3.81262e-12	0.687206	0.84	0.954	4.76196e-08	3	Ten-a
Nrg	5.41839e-09	0.668986	0.628	0.802	6.76756e-05	3	Nrg
Bsg	9.16555e-22	0.665508	0.824	0.91	1.14478e-17	3	Bsg
Tsp96F	2.55657e-07	0.657919	0.592	0.765	0.00319315	3	Tsp96F
IA-2	4.03306e-06	0.645978	0.624	0.704	0.0503729	3	IA-2
Hsp83	1.44036e-13	0.644046	0.728	0.858	1.79901e-09	3	Hsp83
CG312211	0.00950389	0.626539	0.544	0.618	1	3	CG31221
Dscam2	3.04348e-10	0.611487	0.848	0.944	3.8013e-06	3	Dscam2
CG40178	2.24159e-05	0.606922	0.608	0.87	0.279974	3	CG40178
CG45263	9.12317e-09	0.591427	0.62	0.62	0.000113948	3	CG45263
Hsp67Ba1	1.78362e-06	0.581412	0.6	0.678	0.0222775	3	Hsp67Ba
CaMKII	7.92146e-29	0.577574	0.852	0.934	9.8939e-25	3	CaMKII
Msp3001	2.80001e-06	0.575327	0.68	0.855	0.0349721	3	Msp300
Sdc	1.51684e-16	0.574635	0.8	0.911	1.89453e-12	3	Sdc
Fer2LCH	1.04599e-06	0.563349	0.68	0.88	0.0130644	3	Fer2LCH
CG14015	0.000268683	0.562559	0.172	0.342	1	3	CG14015
Spase22-23	0.00586679	0.556324	0.276	0.498	1	3	Spase22-23
GluRIA	0.0067417	0.555028	0.22	0.381	1	3	GluRIA
Lar1	0.00036622	0.554766	0.648	0.898	1	3	Lar
tutl	7.92626e-11	0.542991	0.732	0.862	9.89991e-07	3	tutl
PH4alphaEFB	0.00332949	0.5334	0.172	0.312	1	3	PH4alphaEFB
DopEcR	0.000808886	0.530147	0.564	0.77	1	3	DopEcR
EMC3	0.000120749	0.523043	0.22	0.44	1	3	EMC3
VhaM8.9	0.00533125	0.520328	0.376	0.711	1	3	VhaM8.9
CdsA	0.00184276	0.515366	0.244	0.452	1	3	CdsA
Nrx-IV	0.00987557	0.514129	0.184	0.317	1	3	Nrx-IV
sns	0.00184934	0.512839	0.152	0.285	1	3	sns
nAChRalpha21	0.00262811	0.511193	0.268	0.491	1	3	nAChRalpha2
CG31998	0.00714578	0.507404	0.312	0.568	1	3	CG31998
CG31650	0.000294241	0.504353	0.264	0.514	1	3	CG31650
Tsp86D	0.000488301	0.500431	0.188	0.364	1	3	Tsp86D
Tsp97E	0.00344481	0.499491	0.288	0.526	1	3	Tsp97E
futsch	1.26452e-12	0.499032	0.804	0.936	1.57938e-08	3	futsch
CG43066	0.000382051	0.494312	0.2	0.389	1	3	CG43066
CG1090	0.000669955	0.493454	0.26	0.495	1	3	CG1090
ctp	1.06799e-14	0.4905	0.864	0.935	1.33392e-10	3	ctp
CG12950	2.14317e-05	0.489964	0.216	0.45	0.267682	3	CG12950
CG32206	0.00219159	0.489503	0.292	0.532	1	3	CG32206
SERCA	0.00522846	0.487959	0.144	0.258	1	3	SERCA
miple1	1.14072e-08	0.487475	0.936	0.979	0.000142475	3	miple1
Sec61alpha	0.00153549	0.48605	0.272	0.512	1	3	Sec61alpha
Dg	0.000426307	0.484993	0.26	0.5	1	3	Dg
CG5027	0.000616775	0.483714	0.22	0.42	1	3	CG5027
Sc2	6.15724e-05	0.482412	0.172	0.358	0.769039	3	Sc2
CG1265	0.00041154	0.48235	0.188	0.366	1	3	CG1265
CG31522	1.38155e-05	0.479668	0.156	0.342	0.172556	3	CG31522
Rtnl1	5.82907e-19	0.478645	0.912	0.959	7.28051e-15	3	Rtnl1
GABA-B-R2	0.000815366	0.478024	0.244	0.462	1	3	GABA-B-R2
CG3907	0.00235787	0.476499	0.14	0.261	1	3	CG3907
hth2	0.00189091	0.470993	0.316	0.539	1	3	hth
CG8668	0.000114242	0.467379	0.288	0.572	1	3	CG8668
PIG-F	8.40151e-06	0.464406	0.232	0.492	0.104935	3	PIG-F
CG2519	0.000437458	0.464117	0.268	0.513	1	3	CG2519
CG14767	0.00696539	0.463964	0.336	0.612	1	3	CG14767
dpr151	0.00385574	0.462245	0.152	0.276	1	3	dpr15
robo1	0.00123424	0.461691	0.176	0.331	1	3	robo1
Nlg4	0.000121408	0.454908	0.184	0.369	1	3	Nlg4
CG32441	0.00819177	0.451138	0.368	0.684	1	3	CG32441
CG44837	0.000355301	0.451032	0.184	0.357	1	3	CG44837
Fas1	0.00214528	0.448556	0.172	0.316	1	3	Fas1
Tl	0.00612823	0.447423	0.168	0.292	1	3	Tl
poe	7.67178e-05	0.446591	0.168	0.348	0.958206	3	poe
CG8460	0.00116076	0.445811	0.136	0.263	1	3	CG8460
rin	3.84604e-05	0.443194	0.648	0.843	0.480371	3	rin
rho-5	0.000105988	0.442629	0.144	0.302	1	3	rho-5
Pdcd4	9.03334e-05	0.442014	0.62	0.837	1	3	Pdcd4
unc791	0.00549601	0.439723	0.332	0.609	1	3	unc79
Tsp66E1	0.006405	0.438516	0.628	0.839	1	3	Tsp66E
CG11611	6.48456e-05	0.43739	0.256	0.514	0.809921	3	CG1161
Hs3st-B	0.00086364	0.436271	0.244	0.455	1	3	Hs3st-B
Ndae1	0.000781514	0.43378	0.252	0.477	1	3	Ndae1
l(1)G0289	5.93156e-05	0.43168	0.148	0.314	0.740852	3	l(1)G0289
CG12163	0.00663221	0.431562	0.224	0.384	1	3	CG12163
2mit	0.000307388	0.431511	0.156	0.309	1	3	2mit
Nrk	0.00266168	0.422336	0.156	0.286	1	3	Nrk
Nmdar2	0.000137015	0.420275	0.128	0.271	1	3	Nmdar2
SsRbeta	1.81351e-06	0.420146	0.176	0.398	0.0226508	3	SsRbeta
nAChRalpha3	0.00190008	0.420141	0.264	0.473	1	3	nAChRalpha3
Gycalpha99B	0.00204099	0.419943	0.264	0.489	1	3	Gycalpha99B
Pis	1.93387e-06	0.41968	0.268	0.579	0.0241541	3	Pis
nSyb	7.24106e-09	0.419562	0.74	0.9	9.04408e-05	3	nSyb
CtsB1	5.27961e-06	0.41859	0.156	0.351	0.0659424	3	CtsB1
Cam	1.95196e-22	0.418551	0.988	0.997	2.438e-18	3	Cam
dpr20	0.00077061	0.417042	0.148	0.287	1	3	dpr20
beat-VII	0.00606235	0.41425	0.148	0.26	1	3	beat-VII
Vha16-1	1.42281e-08	0.412309	0.832	0.95	0.000177709	3	Vha16-1
CG42404	7.40906e-06	0.412094	0.208	0.444	0.0925392	3	CG42404
trn1	0.00273349	0.410247	0.284	0.492	1	3	trn
olf413	0.000360535	0.40901	0.316	0.589	1	3	olf413
CHOp24	1.60326e-05	0.407176	0.264	0.547	0.200248	3	CHOp24
Oatp74D	0.00347997	0.407023	0.336	0.623	1	3	Oatp74D
CG7985	5.99632e-05	0.405858	0.14	0.298	0.74894	3	CG7985
CG11030	0.00102791	0.405748	0.296	0.535	1	3	CG11030
drl	0.00124799	0.405044	0.18	0.333	1	3	drl
CG4729	3.69319e-07	0.405017	0.236	0.53	0.00461279	3	CG4729
amon	6.76024e-05	0.4003	0.18	0.363	0.844353	3	amon
CadN2	0.000205346	0.399017	0.18	0.357	1	3	CadN2
tty	5.05711e-05	0.397713	0.288	0.583	0.631634	3	tty
CG4133	0.00146931	0.39647	0.136	0.259	1	3	CG4133
dpr11	0.00487274	0.393055	0.28	0.484	1	3	dpr11
mgl	0.00344745	0.392641	0.204	0.36	1	3	mgl
pgant5	6.67635e-06	0.392238	0.124	0.291	0.0833876	3	pgant5
svr	7.50019e-06	0.392019	0.264	0.547	0.0936774	3	svr
CG4612	0.00221103	0.390211	0.34	0.651	1	3	CG4612
VhaPPA1-1	6.35726e-06	0.389576	0.256	0.544	0.0794022	3	VhaPPA1-1
sli	6.16502e-06	0.389554	0.196	0.419	0.0770011	3	sli
Cdep	8.78673e-06	0.388791	0.292	0.604	0.109746	3	Cdep
CNPYb	5.45068e-07	0.386404	0.18	0.417	0.00680789	3	CNPYb
beat-Va	0.000161159	0.386116	0.18	0.359	1	3	beat-Va
unc-13-4A	0.00486739	0.385678	0.156	0.274	1	3	unc-13-4A
Fie	2.80944e-07	0.385335	0.144	0.354	0.00350899	3	Fie
fne	1.80565e-17	0.384327	0.968	0.992	2.25526e-13	3	fne
CG3792	0.00106357	0.38309	0.144	0.276	1	3	CG3792
RIC-3	1.3758e-06	0.381669	0.192	0.432	0.0171838	3	RIC-3
CG13784	0.00118039	0.378854	0.32	0.603	1	3	CG13784
Ubr3	0.0069724	0.37885	0.348	0.643	1	3	Ubr3
Dhc64C	0.00240388	0.378615	0.156	0.288	1	3	Dhc64C
Unr	0.000215981	0.378556	0.748	0.946	1	3	Unr
shakB	1.58943e-13	0.376904	0.944	0.976	1.9852e-09	3	shakB
MYPT-75D	0.000681938	0.373606	0.18	0.336	1	3	MYPT-75D
CG425941	0.000246664	0.372924	0.248	0.47	1	3	CG42594
eIF4G2	0.000201459	0.37245	0.316	0.626	1	3	eIF4G2
CG4341	6.93604e-05	0.372044	0.152	0.314	0.866312	3	CG4341
CG31690	0.000216472	0.371861	0.168	0.332	1	3	CG31690
CG15270	2.46409e-05	0.370474	0.132	0.293	0.307765	3	CG15270
Sar1	0.00104802	0.369378	0.356	0.682	1	3	Sar1
Galphao	0.00189012	0.368457	0.628	0.854	1	3	Galphao
EMC1	0.000242848	0.366449	0.136	0.278	1	3	EMC1
drpr	5.43638e-06	0.361617	0.136	0.315	0.0679004	3	drpr
dpr19	0.000532424	0.358825	0.328	0.633	1	3	dpr19
ste24a	0.000123121	0.358499	0.132	0.279	1	3	ste24a
CD98hc	1.83962e-06	0.357319	0.14	0.33	0.0229769	3	CD98hc
Spt-I	3.37415e-05	0.354085	0.14	0.305	0.421431	3	Spt-I
mAChR-A	0.000824723	0.352651	0.308	0.585	1	3	mAChR-A
l(1)G0320	1.1628e-06	0.352249	0.296	0.645	0.0145233	3	l(1)G0320
Rbp9	0.000399647	0.351678	0.772	0.921	1	3	Rbp9
CG5554	9.02343e-10	0.351506	0.196	0.502	1.12703e-05	3	CG5554
Chc	7.91508e-06	0.351251	0.232	0.488	0.0988593	3	Chc
KdelR	2.1795e-05	0.350613	0.308	0.636	0.272219	3	KdelR
aph-1	1.38536e-05	0.348972	0.124	0.285	0.173031	3	aph-1
eca	4.1445e-06	0.348302	0.216	0.466	0.0517648	3	eca
CG32017	4.40422e-12	0.346581	0.168	0.479	5.50087e-08	3	CG32017
Dap160	5.76921e-05	0.346148	0.236	0.479	0.720574	3	Dap160
Nhe3	1.17111e-07	0.345199	0.176	0.42	0.00146272	3	Nhe3
Dhit	0.00019727	0.345122	0.684	0.899	1	3	Dhit
Fili1	1.91814e-05	0.340002	0.12	0.274	0.239576	3	Fili
eIF4H1	3.87256e-05	0.339805	0.324	0.666	0.483683	3	eIF4H1
para	2.99896e-05	0.339619	0.84	0.968	0.374571	3	para
CG32521	0.000489806	0.337587	0.18	0.338	1	3	CG32521
mask	0.000221873	0.336393	0.32	0.633	1	3	mask
CG13887	3.21964e-05	0.331805	0.34	0.696	0.402133	3	CG13887
CG3655	0.000386033	0.33169	0.192	0.364	1	3	CG3655
DIP-gamma	0.000721946	0.329509	0.184	0.344	1	3	DIP-gamma
CG7781	3.06331e-05	0.328489	0.756	0.922	0.382607	3	CG7781
dpr9	0.00800188	0.327915	0.348	0.603	1	3	dpr9
cnn	8.50298e-08	0.326874	0.156	0.386	0.00106202	3	cnn
RSG7	4.44695e-06	0.326803	0.236	0.506	0.0555423	3	RSG7
Invadolysin	1.76163e-05	0.325067	0.12	0.276	0.220027	3	Invadolysin
twr	0.00396732	0.323417	0.364	0.68	1	3	twr
Ca-alpha1D	8.45966e-06	0.323173	0.296	0.614	0.105661	3	Ca-alpha1D
fra	1.48311e-07	0.32162	0.16	0.387	0.00185241	3	fra
CG11999	1.53098e-07	0.317275	0.108	0.294	0.0019122	3	CG11999
Tomosyn	0.00048135	0.317212	0.34	0.642	1	3	Tomosyn
CG7166	3.36379e-07	0.316031	0.192	0.441	0.00420138	3	CG7166
CG6329	9.70992e-07	0.315931	0.824	0.945	0.0121277	3	CG6329
GEFmeso	4.88279e-05	0.315496	0.212	0.43	0.60986	3	GEFmeso
uex	0.00288355	0.314184	0.4	0.758	1	3	uex
Ktl	8.27269e-05	0.31294	0.252	0.495	1	3	Ktl
Spp	1.22772e-08	0.312184	0.172	0.433	0.000153343	3	Spp
Vha68-1	1.32021e-07	0.311609	0.24	0.547	0.00164894	3	Vha68-1
CG41378	3.19066e-07	0.310487	0.272	0.601	0.00398513	3	CG41378
eIF4G1	1.88802e-05	0.309517	0.288	0.592	0.235814	3	eIF4G1
CG1688	0.00372841	0.304812	0.144	0.258	1	3	CG1688
Teh2	5.52119e-08	0.304612	0.16	0.395	0.000689597	3	Teh2
CG5021	2.14988e-09	0.303836	0.216	0.532	2.6852e-05	3	CG5021
CG13603	1.90145e-07	0.303629	0.136	0.343	0.00237491	3	CG13603
Bruce	0.000141409	0.302771	0.144	0.297	1	3	Bruce
Ten-m	7.61477e-06	0.300235	0.304	0.609	0.0951084	3	Ten-m
shep	1.56521e-08	0.299351	0.94	0.99	0.000195495	3	shep
shot	4.30423e-06	0.299167	0.216	0.465	0.0537598	3	shot
beat-Ic	0.000109467	0.297471	0.264	0.495	1	3	beat-Ic
aPKC	1.07147e-06	0.297242	0.196	0.441	0.0133827	3	aPKC
dpr13	0.000704836	0.296265	0.376	0.663	1	3	dpr13
ZAP3	2.67945e-05	0.296206	0.128	0.287	0.334664	3	ZAP3
jef	0.000293007	0.2962	0.168	0.331	1	3	jef
zip	2.65407e-08	0.294327	0.236	0.545	0.000331494	3	zip
Socs16D	7.46474e-06	0.293643	0.108	0.263	0.0932347	3	Socs16D
Frl	0.00654998	0.291739	0.424	0.791	1	3	Frl
bai	1.95646e-07	0.291015	0.248	0.552	0.00244362	3	bai
Glut1	0.000315268	0.289909	0.336	0.645	1	3	Glut1
Actbeta	2.75795e-10	0.289559	0.164	0.442	3.44468e-06	3	Actbeta
Hs3st-A	0.00867997	0.289147	0.396	0.683	1	3	Hs3st-A
CG10132	0.000201534	0.287285	0.12	0.253	1	3	CG10132
CG1637	1.41711e-06	0.283856	0.124	0.304	0.0176997	3	CG1637
CG13300	1.0569e-05	0.280858	0.124	0.287	0.132007	3	CG13300
CG43778	5.98415e-08	0.280542	0.14	0.357	0.00074742	3	CG43778
p24-1	1.35114e-05	0.280311	0.116	0.271	0.168757	3	p24-1
dpr14	7.35547e-07	0.278461	0.284	0.617	0.00918699	3	dpr14
CG17684	2.10195e-07	0.275542	0.224	0.505	0.00262534	3	CG17684
tok	0.000143048	0.274965	0.136	0.28	1	3	tok
CG40191	2.47592e-07	0.274459	0.176	0.416	0.00309242	3	CG40191
Sema1a	0.00088638	0.274369	0.828	0.947	1	3	Sema1a
CG9413	1.20737e-09	0.273027	0.112	0.335	1.508e-05	3	CG9413
Lis-1	0.000249485	0.272681	0.336	0.654	1	3	Lis-1
Rdl	9.17706e-08	0.272394	0.936	0.983	0.00114621	3	Rdl
twz	3.76338e-05	0.271054	0.152	0.312	0.470046	3	twz
faf	1.39298e-08	0.271048	0.12	0.333	0.000173984	3	faf
Mtor	1.42138e-05	0.270309	0.12	0.278	0.177531	3	Mtor
Toll-7	7.8411e-05	0.269608	0.14	0.295	0.979354	3	Toll-7
nkd	1.00665e-05	0.267637	0.268	0.534	0.125731	3	nkd
wls	1.34761e-09	0.267385	0.144	0.396	1.68317e-05	3	wls
nmd	1.93088e-10	0.266582	0.136	0.394	2.41167e-06	3	nmd
CG1636	7.95368e-06	0.265207	0.108	0.262	0.0993414	3	CG1636
crp	6.09009e-06	0.264905	0.3	0.621	0.0760653	3	crp
CG4467	6.19911e-06	0.263925	0.292	0.591	0.0774268	3	CG4467
betaTub56D2	0.000178132	0.263562	0.824	0.918	1	3	betaTub56D
Tudor-SN	6.26013e-06	0.263516	0.108	0.264	0.0781891	3	Tudor-SN
Gbeta13F	0.000306872	0.262318	0.88	0.969	1	3	Gbeta13F
dpr31	0.000227768	0.2621	0.124	0.257	1	3	dpr3
CG10019	8.12758e-07	0.261902	0.144	0.343	0.0101513	3	CG10019
beat-IV1	0.000138141	0.26107	0.148	0.302	1	3	beat-IV
enc	3.37974e-05	0.260961	0.276	0.561	0.422129	3	enc
FMRFaR	2.66847e-06	0.259981	0.108	0.269	0.0333291	3	FMRFaR
fax	3.12945e-07	0.258028	0.92	0.98	0.00390868	3	fax
Nipped-A	3.94907e-09	0.257541	0.236	0.562	4.93238e-05	3	Nipped-A
nonA	3.96881e-07	0.25704	0.236	0.521	0.00495704	3	nonA
Rbp	0.000154123	0.256053	0.352	0.681	1	3	Rbp
CG15814	2.30481e-09	0.255107	0.12	0.346	2.8787e-05	3	CG15814
beat-IIb	0.000153953	0.254722	0.144	0.296	1	3	beat-IIb
Tsp42Ee	1.07084e-07	0.254325	0.16	0.39	0.00133748	3	Tsp42Ee
Nc73EF	9.36942e-09	0.251851	0.172	0.43	0.000117024	3	Nc73EF
Bili	8.14062e-06	0.25171	0.104	0.255	0.101676	3	Bili
CG18467	4.81195e-06	0.25164	0.184	0.399	0.0601013	3	CG18467
Nos	3.48354e-137	1.64093	0.835	0.225	4.35094e-133	4	Nos
CG9109	1.3045e-176	1.32207	0.781	0.127	1.62932e-172	4	CG9109
CG34136	1.87843e-86	1.23067	0.933	0.53	2.34616e-82	4	CG34136
cmpy	2.07171e-98	1.20155	0.996	0.729	2.58757e-94	4	cmpy
Eip93F	6.72156e-93	1.13018	0.996	0.479	8.39523e-89	4	Eip93F
5-HT1A	3.8851e-85	1.03422	0.973	0.514	4.85249e-81	4	5-HT1A
CG34353	2.87079e-83	0.999207	0.991	0.627	3.58562e-79	4	CG34353
ham1	1.11955e-108	0.996667	0.808	0.203	1.39831e-104	4	ham
stai	1.58285e-101	0.996354	1	0.941	1.97698e-97	4	stai
CG34113	3.19934e-78	0.98949	0.987	0.698	3.99598e-74	4	CG34113
lbk1	5.57975e-69	0.933987	0.915	0.516	6.96911e-65	4	lbk
CG4829	9.61817e-65	0.904729	0.679	0.234	1.20131e-60	4	CG4829
pgant2	2.1966e-61	0.892626	0.821	0.412	2.74355e-57	4	pgant2
CG13594	7.87288e-47	0.874748	0.647	0.298	9.83322e-43	4	CG13594
CG42673	2.16557e-74	0.854655	0.759	0.278	2.70479e-70	4	CG42673
CG32052	4.01203e-63	0.843232	0.661	0.234	5.01102e-59	4	CG32052
CG325211	6.72862e-60	0.830955	0.75	0.321	8.40404e-56	4	CG32521
CG102571	3.07122e-87	0.763093	0.424	0.07	3.83595e-83	4	CG10257
Pxn	3.04058e-56	0.742779	0.933	0.574	3.79769e-52	4	Pxn
CG13685	5.26019e-49	0.738792	0.799	0.454	6.56997e-45	4	CG13685
CG30463	1.1727e-48	0.719629	0.902	0.578	1.46471e-44	4	CG30463
CG34155	1.56035e-40	0.714466	0.759	0.387	1.94887e-36	4	CG34155
ap1	1.32189e-61	0.684345	0.746	0.247	1.65103e-57	4	ap
CG32698	5.38518e-36	0.669253	0.638	0.294	6.72609e-32	4	CG32698
CG316371	4.83976e-36	0.665939	0.781	0.514	6.04486e-32	4	CG31637
CG14321	2.80487e-50	0.64923	0.938	0.735	3.50328e-46	4	CG14321
CG15522	2.79283e-34	0.637732	0.746	0.444	3.48824e-30	4	CG15522
Calr1	5.94862e-54	0.629811	0.982	0.848	7.42983e-50	4	Calr
CG4546	1.58127e-176	0.628706	0.299	0.014	1.975e-172	4	CG4546
scro	3.98838e-57	0.613432	0.683	0.215	4.98149e-53	4	scro
qtc	2.42609e-31	0.612432	0.799	0.605	3.03019e-27	4	qtc
Dip-B	2.82574e-17	0.599797	0.429	0.252	3.52935e-13	4	Dip-B
drl1	6.26172e-24	0.582933	0.567	0.321	7.82089e-20	4	drl
roX2	5.21911e-43	0.577949	0.973	0.844	6.51867e-39	4	roX2
Oct-TyrR	2.10975e-30	0.56436	0.754	0.448	2.63507e-26	4	Oct-TyrR
CG84981	1.19826e-38	0.557676	0.955	0.774	1.49663e-34	4	CG8498
trn2	1.70132e-35	0.553836	0.817	0.476	2.12495e-31	4	trn
CR45418	2.73416e-31	0.540075	0.272	0.071	3.41497e-27	4	CR45418
HmgD1	1.57897e-29	0.529803	0.866	0.71	1.97213e-25	4	HmgD
hdc1	4.33612e-09	0.524432	0.616	0.515	5.41582e-05	4	hdc
toy1	1.49728e-31	0.517173	0.853	0.429	1.8701e-27	4	toy
bou	7.57822e-21	0.508555	0.295	0.108	9.4652e-17	4	bou
cib1	6.4457e-21	0.507808	0.83	0.696	8.05068e-17	4	cib
CG139201	8.86524e-49	0.507508	0.996	0.918	1.10727e-44	4	CG13920
Su(var)2051	1.12125e-33	0.504472	0.92	0.764	1.40045e-29	4	Su(var)205
qm	1.07064e-17	0.501403	0.317	0.138	1.33723e-13	4	qm
Tapdelta	1.672e-28	0.497047	0.844	0.648	2.08833e-24	4	Tapdelta
CR45312	1.19341e-27	0.487772	0.723	0.447	1.49057e-23	4	CR45312
pigs	1.02648e-17	0.48418	0.585	0.394	1.28208e-13	4	pigs
CG17270	9.19592e-36	0.482011	0.969	0.817	1.14857e-31	4	CG17270
Hsp67Bc1	2.98776e-64	0.479471	1	0.989	3.73172e-60	4	Hsp67Bc
dpr5	1.6088e-15	0.477702	0.54	0.35	2.00939e-11	4	dpr5
Hr41	9.10344e-34	0.476386	0.987	0.892	1.13702e-29	4	Hr4
Sec61beta	1.0231e-28	0.472885	0.938	0.807	1.27785e-24	4	Sec61beta
Flo1	7.13607e-15	0.47106	0.594	0.451	8.91295e-11	4	Flo1
CG2862	1.32813e-21	0.470703	0.853	0.697	1.65883e-17	4	CG2862
smal	4.19e-23	0.469922	0.746	0.496	5.23331e-19	4	smal
beat-IIIb1	1.57212e-22	0.46748	0.746	0.506	1.96358e-18	4	beat-IIIb
DENR1	1.31944e-11	0.463949	0.554	0.462	1.64798e-07	4	DENR
glec1	1.10673e-21	0.46339	0.705	0.485	1.3823e-17	4	glec
CG34371	4.67868e-18	0.46208	0.58	0.358	5.84368e-14	4	CG34371
Nca	8.32443e-22	0.456186	0.853	0.737	1.03972e-17	4	Nca
CG15012	1.14669e-27	0.455759	0.942	0.821	1.43222e-23	4	CG15012
Shawl	2.17944e-16	0.453442	0.527	0.33	2.72212e-12	4	Shawl
Prosbeta4	8.4393e-21	0.453165	0.808	0.628	1.05407e-16	4	Prosbeta4
caps1	1.37968e-21	0.453124	0.768	0.537	1.72322e-17	4	caps
alphaTub84B1	8.88063e-39	0.452633	1	0.974	1.10919e-34	4	alphaTub84B
fz2	5.90785e-33	0.451699	0.946	0.747	7.3789e-29	4	fz2
boca	1.74203e-17	0.450588	0.688	0.546	2.1758e-13	4	boca
CG122791	5.15118e-18	0.448954	0.643	0.482	6.43382e-14	4	CG12279
CG6180	5.73678e-13	0.441922	0.549	0.426	7.16524e-09	4	CG6180
Rpt31	3.51416e-18	0.44027	0.714	0.568	4.38919e-14	4	Rpt3
Nurf-381	3.22074e-22	0.437007	0.768	0.592	4.02271e-18	4	Nurf-38
Pde6	1.85769e-20	0.433089	0.884	0.725	2.32025e-16	4	Pde6
Sox102F	3.78276e-24	0.432932	0.357	0.122	4.72467e-20	4	Sox102F
robo3	7.93134e-12	0.431829	0.42	0.259	9.90624e-08	4	robo3
CG42540	9.54945e-37	0.429614	0.991	0.903	1.19273e-32	4	CG42540
Prosalpha5	2.24091e-13	0.427845	0.634	0.53	2.79889e-09	4	Prosalpha5
Tbh	3.61737e-13	0.421828	0.326	0.167	4.51809e-09	4	Tbh
awd	8.34925e-31	0.42037	0.996	0.876	1.04282e-26	4	awd
CG314601	7.11593e-14	0.420185	0.554	0.411	8.8878e-10	4	CG31460
dpr8	8.17464e-23	0.416067	0.897	0.707	1.02101e-18	4	dpr8
Eip75B1	7.18498e-19	0.41604	0.871	0.724	8.97404e-15	4	Eip75B
ths	1.42589e-10	0.413813	0.496	0.364	1.78094e-06	4	ths
CG83971	5.98189e-16	0.412965	0.571	0.396	7.47137e-12	4	CG8397
dpr18	3.05693e-08	0.412752	0.46	0.352	0.00038181	4	dpr18
Prosbeta31	2.8728e-15	0.407701	0.737	0.616	3.58812e-11	4	Prosbeta3
emc1	6.68656e-19	0.406899	0.781	0.591	8.35152e-15	4	emc
St3	8.75752e-11	0.403675	0.527	0.387	1.09381e-06	4	St3
Prosbeta11	8.91883e-15	0.403198	0.71	0.609	1.11396e-10	4	Prosbeta1
Spase25	2.42756e-16	0.401673	0.692	0.578	3.03202e-12	4	Spase25
MRE16	1.09175e-35	0.400898	1	0.953	1.36359e-31	4	MRE16
Prosbeta6	2.23492e-15	0.399477	0.656	0.525	2.79142e-11	4	Prosbeta6
CG42389	5.24988e-20	0.398219	0.839	0.668	6.55711e-16	4	CG42389
CG14535	5.10313e-12	0.39548	0.549	0.397	6.37381e-08	4	CG14535
mri	1.20952e-09	0.39517	0.415	0.292	1.51069e-05	4	mri
Hsp271	3.72338e-18	0.39339	0.871	0.658	4.6505e-14	4	Hsp27
Argk1	3.18919e-29	0.392223	0.987	0.885	3.98329e-25	4	Argk
Rcd4	3.30499e-07	0.389194	0.259	0.161	0.00412793	4	Rcd4
Prosalpha2	3.31009e-14	0.388931	0.781	0.665	4.1343e-10	4	Prosalpha2
dpr21	1.49214e-23	0.388631	0.982	0.867	1.86368e-19	4	dpr21
Set1	6.64511e-13	0.388328	0.638	0.527	8.29974e-09	4	Set
CG12384	5.70044e-17	0.382061	0.79	0.697	7.11985e-13	4	CG12384
Atox11	1.90983e-28	0.379456	0.996	0.91	2.38538e-24	4	Atox1
veli	2.99747e-15	0.377168	0.817	0.712	3.74384e-11	4	veli
Uch1	3.14557e-07	0.376428	0.424	0.34	0.00392882	4	Uch
CG423762	4.41244e-12	0.376404	0.509	0.37	5.51114e-08	4	CG42376
CaBP1	1.41262e-13	0.375503	0.67	0.535	1.76436e-09	4	CaBP1
Fer2LCH1	9.97468e-22	0.375379	0.964	0.872	1.24584e-17	4	Fer2LCH
Tsp39D	4.19423e-22	0.375339	0.92	0.836	5.2386e-18	4	Tsp39D
ringer	1.98036e-26	0.374136	0.991	0.89	2.47348e-22	4	ringer
CG30172	2.48971e-44	0.373903	1	0.967	3.10965e-40	4	CG30172
CG14818	9.57438e-16	0.373392	0.804	0.707	1.19584e-11	4	CG14818
Trim91	2.71473e-14	0.373043	0.683	0.49	3.39069e-10	4	Trim9
Mtch1	4.26193e-12	0.371608	0.567	0.46	5.32316e-08	4	Mtch
p120ctn1	3.25872e-18	0.370244	0.915	0.83	4.07014e-14	4	p120ctn
Spn	6.92811e-32	0.369199	0.996	0.947	8.65321e-28	4	Spn
sbb	7.34307e-30	0.367581	0.991	0.918	9.17149e-26	4	sbb
r2d2	9.10818e-12	0.366507	0.424	0.285	1.13761e-07	4	r2d2
CG33977	1.39173e-13	0.36646	0.746	0.629	1.73827e-09	4	CG33977
CG32369	4.54577e-08	0.36398	0.487	0.391	0.000567767	4	CG32369
Jwa1	5.15706e-11	0.363388	0.571	0.463	6.44117e-07	4	Jwa
hbs1	2.4224e-15	0.363343	0.549	0.343	3.02558e-11	4	hbs
Rpn101	1.0417e-08	0.361628	0.522	0.437	0.000130109	4	Rpn10
fred1	4.1985e-23	0.358067	0.853	0.563	5.24392e-19	4	fred
janA	1.0995e-10	0.358036	0.647	0.562	1.37328e-06	4	janA
CG310751	4.64731e-06	0.357888	0.344	0.261	0.0580449	4	CG31075
Sh3beta1	3.03068e-10	0.355023	0.612	0.544	3.78532e-06	4	Sh3beta
Snp	4.30532e-08	0.354875	0.312	0.2	0.000537734	4	Snp
Prosbeta21	7.71932e-13	0.354133	0.746	0.651	9.64143e-09	4	Prosbeta2
Ostgamma	3.27834e-12	0.353905	0.607	0.492	4.09465e-08	4	Ostgamma
bai1	8.96858e-13	0.3531	0.647	0.54	1.12018e-08	4	bai
CG15111	1.43536e-07	0.352745	0.321	0.216	0.00179277	4	CG15111
plx1	5.82907e-08	0.349369	0.513	0.424	0.00072805	4	plx
CCT41	1.89104e-10	0.349092	0.585	0.49	2.36191e-06	4	CCT4
CG171241	4.53674e-20	0.349026	0.951	0.826	5.66639e-16	4	CG17124
Prosbeta5	4.39289e-16	0.347098	0.821	0.69	5.48672e-12	4	Prosbeta5
CG31715	3.10875e-14	0.345826	0.746	0.623	3.88282e-10	4	CG31715
sdt	1.72649e-19	0.34408	0.879	0.749	2.15638e-15	4	sdt
CG9917	1.52396e-05	0.343826	0.286	0.205	0.190343	4	CG9917
CG10098	3.61687e-16	0.343577	0.902	0.793	4.51747e-12	4	CG10098
CG42339	1.61483e-10	0.342376	0.518	0.358	2.01692e-06	4	CG42339
lwr	4.51855e-13	0.341986	0.75	0.647	5.64367e-09	4	lwr
X11Lbeta	1.70028e-13	0.340205	0.714	0.577	2.12364e-09	4	X11Lbeta
CG15236	2.4272e-13	0.339991	0.638	0.456	3.03157e-09	4	CG15236
CG15168	8.44347e-12	0.339653	0.603	0.485	1.05459e-07	4	CG15168
CG9257	1.46292e-10	0.338684	0.473	0.35	1.82718e-06	4	CG9257
Prosalpha3	9.36133e-10	0.33827	0.656	0.569	1.16923e-05	4	Prosalpha3
pHCl-1	2.70779e-12	0.338244	0.67	0.483	3.38203e-08	4	pHCl-1
smt3	8.09079e-26	0.337421	0.991	0.914	1.01054e-21	4	smt3
twr1	2.6786e-13	0.335913	0.763	0.668	3.34557e-09	4	twr
CG54461	5.40514e-09	0.335551	0.612	0.532	6.75102e-05	4	CG5446
CG5934	2.07668e-10	0.334705	0.67	0.594	2.59378e-06	4	CG5934
BEAF-32	3.63774e-09	0.334419	0.518	0.423	4.54354e-05	4	BEAF-32
Galphas	1.68203e-12	0.333076	0.75	0.67	2.10086e-08	4	Galphas
CG100771	1.72051e-19	0.331774	0.964	0.855	2.14891e-15	4	CG10077
CG3625	2.19888e-14	0.331497	0.812	0.705	2.7464e-10	4	CG3625
B52	4.40121e-14	0.331362	0.871	0.784	5.49711e-10	4	B52
SP23531	3.96923e-16	0.329738	0.759	0.609	4.95757e-12	4	SP2353
Jupiter	6.3542e-29	0.329299	0.991	0.934	7.9364e-25	4	Jupiter
Hsp261	4.52806e-19	0.329119	0.982	0.851	5.65554e-15	4	Hsp26
trv	2.19721e-23	0.32778	1	0.901	2.74432e-19	4	trv
CG7519	0.000204951	0.327163	0.33	0.274	1	4	CG7519
Smn	2.37022e-07	0.326378	0.464	0.391	0.0029604	4	Smn
CG148831	0.000446289	0.324844	0.375	0.334	1	4	CG14883
Cyp1	7.55674e-45	0.324742	1	0.985	9.43837e-41	4	Cyp1
CG9669	2.33518e-05	0.324097	0.46	0.423	0.291664	4	CG9669
PKD	2.01066e-07	0.32392	0.304	0.194	0.00251132	4	PKD
Manf	2.41189e-06	0.323857	0.406	0.33	0.0301245	4	Manf
SmD3	4.68367e-08	0.323605	0.491	0.398	0.000584991	4	SmD3
Pfdn5	4.16772e-11	0.323021	0.763	0.674	5.20548e-07	4	Pfdn5
jigr1	5.02695e-06	0.32165	0.317	0.227	0.0627866	4	jigr1
eIF4E1	4.34496e-16	0.321516	0.92	0.829	5.42685e-12	4	eIF4E1
CG102831	7.20393e-06	0.320249	0.277	0.185	0.0899771	4	CG10283
Scgbeta1	9.37069e-09	0.31883	0.67	0.62	0.00011704	4	Scgbeta
SrpRbeta	8.61279e-08	0.318498	0.42	0.33	0.00107574	4	SrpRbeta
PIP4K1	6.14732e-10	0.318044	0.661	0.589	7.67801e-06	4	PIP4K
CG13364	3.77015e-14	0.316277	0.915	0.805	4.70892e-10	4	CG13364
san	2.39285e-08	0.316271	0.446	0.348	0.000298867	4	san
CG32261	5.36019e-06	0.314636	0.433	0.37	0.0669488	4	CG3226
Mgstl1	2.19008e-05	0.314414	0.295	0.211	0.273542	4	Mgstl
x16	1.11809e-07	0.314166	0.522	0.458	0.00139649	4	x16
mam	1.92704e-15	0.313739	0.884	0.806	2.40687e-11	4	mam
CG14853	6.92746e-07	0.310434	0.357	0.252	0.0086524	4	CG14853
SmE	2.35576e-10	0.309892	0.629	0.526	2.94235e-06	4	SmE
CG2852	3.68802e-31	0.309415	0.996	0.954	4.60633e-27	4	CG2852
Snx3	2.05062e-07	0.309231	0.536	0.485	0.00256122	4	Snx3
CG82091	1.06887e-07	0.308822	0.536	0.47	0.00133501	4	CG8209
Scox	1.46395e-06	0.306578	0.402	0.322	0.0182847	4	Scox
MED71	3.21996e-07	0.306319	0.558	0.506	0.00402174	4	MED7
CG10139	4.06223e-05	0.306191	0.433	0.383	0.507372	4	CG10139
VhaM8.91	5.66108e-14	0.305829	0.795	0.698	7.07068e-10	4	VhaM8.9
CG42340	2.39968e-13	0.304625	0.79	0.637	2.9972e-09	4	CG42340
Arpc4	6.42053e-12	0.304557	0.723	0.62	8.01925e-08	4	Arpc4
CG156281	3.90377e-11	0.304392	0.661	0.539	4.8758e-07	4	CG15628
CG2021	3.37358e-06	0.304122	0.451	0.393	0.0421361	4	CG2021
Arpc3A	6.80571e-09	0.303447	0.603	0.534	8.50033e-05	4	Arpc3A
CG13071	1.60378e-06	0.302745	0.5	0.452	0.0200312	4	CG1307
l(2)SH0834	6.75249e-06	0.302119	0.464	0.407	0.0843386	4	l(2)SH0834
cdi	6.64689e-11	0.301075	0.781	0.693	8.30197e-07	4	cdi
PIG-K	2.31834e-05	0.300719	0.312	0.234	0.289561	4	PIG-K
Non2	8.28029e-10	0.300271	0.728	0.637	1.03421e-05	4	Non2
galectin	5.23824e-06	0.299903	0.411	0.334	0.0654257	4	galectin
Fer1HCH	5.14486e-15	0.298722	0.924	0.814	6.42594e-11	4	Fer1HCH
CG6024	1.44304e-11	0.298439	0.786	0.691	1.80236e-07	4	CG6024
Oli	2.0356e-07	0.298145	0.549	0.475	0.00254247	4	Oli
CG8331	5.87989e-09	0.29779	0.58	0.498	7.34398e-05	4	CG8331
Prosalpha4	6.87467e-07	0.297189	0.562	0.507	0.00858646	4	Prosalpha4
CG1840	7.50375e-06	0.296208	0.388	0.309	0.0937218	4	CG1840
Pfdn4	2.95487e-09	0.295132	0.719	0.649	3.69064e-05	4	Pfdn4
CG83001	2.70949e-06	0.294653	0.442	0.37	0.0338416	4	CG8300
Srp14	5.84237e-09	0.294517	0.585	0.502	7.29713e-05	4	Srp14
Rpn12	2.59189e-05	0.294263	0.478	0.441	0.323727	4	Rpn12
Gp93	6.95834e-06	0.294049	0.487	0.44	0.0869096	4	Gp93
AstC-R11	1.13862e-06	0.293538	0.321	0.208	0.0142214	4	AstC-R1
Hel25E1	1.87438e-08	0.292826	0.643	0.587	0.000234111	4	Hel25E
CG43222	3.42739e-11	0.292596	0.839	0.718	4.28081e-07	4	CG43222
stan	5.02442e-06	0.292037	0.357	0.254	0.0627551	4	stan
Dad11	2.3532e-09	0.29066	0.652	0.564	2.93915e-05	4	Dad1
mago	7.62927e-10	0.28917	0.634	0.544	9.52896e-06	4	mago
KdelR1	1.80994e-10	0.289129	0.714	0.623	2.26061e-06	4	KdelR
Rpb11	1.84877e-09	0.288987	0.571	0.477	2.30912e-05	4	Rpb11
Syn1	3.55339e-16	0.288751	0.915	0.798	4.43819e-12	4	Syn1
CG12107	0.00121267	0.286666	0.344	0.304	1	4	CG12107
RpS3A	3.07886e-24	0.286032	1	0.952	3.8455e-20	4	RpS3A
CSN4	0.000782297	0.285427	0.326	0.281	1	4	CSN4
mRpL22	4.32048e-06	0.284602	0.496	0.452	0.0539627	4	mRpL22
CG11360	5.87235e-12	0.283993	0.902	0.849	7.33456e-08	4	CG11360
CG14312	2.98623e-13	0.283943	0.938	0.824	3.7298e-09	4	CG14312
Diap1	5.95699e-08	0.283487	0.585	0.519	0.000744028	4	Diap1
CG33129	9.17384e-10	0.283389	0.817	0.745	1.14581e-05	4	CG33129
CG40498	6.15637e-14	0.282602	0.906	0.788	7.6893e-10	4	CG40498
Sem11	1.51182e-06	0.281981	0.536	0.491	0.0188827	4	Sem1
nmd1	9.23127e-05	0.281924	0.424	0.385	1	4	nmd
snRNA:7SK1	3.02837e-05	0.281168	0.598	0.567	0.378244	4	snRNA:7SK
CG55161	1.60832e-06	0.280798	0.482	0.415	0.020088	4	CG5516
Pp1-87B	7.23866e-08	0.280577	0.679	0.643	0.000904108	4	Pp1-87B
CG9662	5.35738e-07	0.280059	0.491	0.422	0.00669137	4	CG9662
CG42324	1.13632e-06	0.279721	0.473	0.383	0.0141927	4	CG42324
Stt3B	4.93968e-05	0.2796	0.339	0.273	0.616966	4	Stt3B
CG7484	2.15178e-09	0.279445	0.661	0.582	2.68757e-05	4	CG7484
mRpS25	2.51852e-07	0.278611	0.54	0.48	0.00314563	4	mRpS25
Mob3	0.000189926	0.277374	0.379	0.336	1	4	Mob3
CG9205	5.38565e-05	0.277321	0.402	0.35	0.672668	4	CG9205
CG138871	8.75748e-12	0.27725	0.799	0.682	1.09381e-07	4	CG13887
vig21	1.67088e-06	0.276823	0.629	0.625	0.0208693	4	vig2
CG8993	4.79662e-10	0.276673	0.696	0.614	5.99098e-06	4	CG8993
eEF1delta	0.00187863	0.276347	0.304	0.262	1	4	eEF1delta
CSN51	9.43448e-05	0.276003	0.357	0.298	1	4	CSN5
FKBP591	5.59622e-08	0.275196	0.679	0.606	0.000698968	4	FKBP59
dpr131	1.085e-15	0.273481	0.879	0.647	1.35517e-11	4	dpr13
Rheb	0.000126726	0.272798	0.415	0.376	1	4	Rheb
CG42336	7.01413e-06	0.272707	0.496	0.439	0.0876065	4	CG42336
CG11137	0.00286974	0.272701	0.335	0.307	1	4	CG11137
Txl1	0.00048062	0.271996	0.317	0.265	1	4	Txl
SC35	5.44064e-08	0.271744	0.638	0.564	0.000679536	4	SC35
Mis121	6.20407e-06	0.27168	0.527	0.496	0.0774889	4	Mis12
CG5885	1.8008e-07	0.270848	0.638	0.612	0.0022492	4	CG5885
Adf1	0.00019505	0.270687	0.357	0.303	1	4	Adf1
KrT95D	3.51274e-11	0.270395	0.79	0.723	4.38741e-07	4	KrT95D
CG17641	2.5987e-09	0.270311	0.643	0.562	3.24577e-05	4	CG1764
HP1c	0.00054279	0.269619	0.357	0.314	1	4	HP1c
mats	0.001128	0.268583	0.321	0.274	1	4	mats
wit	9.53186e-06	0.268473	0.254	0.163	0.119053	4	wit
CG10470	1.70144e-07	0.267961	0.545	0.472	0.0021251	4	CG10470
Arpc1	2.7696e-05	0.267491	0.496	0.461	0.345923	4	Arpc1
Ggamma30A1	1.67819e-24	0.267472	1	0.979	2.09606e-20	4	Ggamma30A
ksh	6.76463e-05	0.26727	0.366	0.307	0.844902	4	ksh
Alg-2	1.58028e-07	0.266286	0.585	0.513	0.00197378	4	Alg-2
dlp	3.68812e-06	0.265686	0.272	0.17	0.0460647	4	dlp
CG7006	0.00112168	0.265334	0.308	0.264	1	4	CG7006
mnd	0.0025086	0.265223	0.277	0.224	1	4	mnd
SF21	1.4242e-07	0.263602	0.67	0.643	0.00177883	4	SF2
Rm62	7.18294e-12	0.263494	0.915	0.827	8.9715e-08	4	Rm62
asrij	0.00238209	0.263031	0.339	0.311	1	4	asrij
CG5059	2.64924e-06	0.262464	0.411	0.321	0.033089	4	CG5059
CRMP	9.14609e-08	0.26229	0.754	0.711	0.00114235	4	CRMP
Pfdn6	6.08591e-09	0.262051	0.728	0.653	7.6013e-05	4	Pfdn6
COX7A	2.20816e-17	0.26186	0.991	0.902	2.75799e-13	4	COX7A
eca1	2.69583e-05	0.260719	0.491	0.458	0.336709	4	eca
Prosalpha71	1.04547e-06	0.26051	0.603	0.561	0.0130579	4	Prosalpha7
CG36891	2.31452e-06	0.260464	0.612	0.585	0.0289084	4	CG3689
CG17059	2.10865e-05	0.260256	0.554	0.533	0.26337	4	CG17059
DCTN3-p24	0.000513701	0.259932	0.312	0.257	1	4	DCTN3-p24
lost	2.00244e-06	0.259925	0.585	0.541	0.0250105	4	lost
put1	1.61394e-05	0.259506	0.438	0.365	0.201581	4	put
CG50271	0.000196372	0.25896	0.446	0.413	1	4	CG5027
M61	0.00035889	0.258257	0.362	0.307	1	4	M6
CG168171	1.13917e-09	0.257009	0.848	0.765	1.42283e-05	4	CG16817
CG14715	1.81877e-10	0.256826	0.674	0.552	2.27165e-06	4	CG14715
Taf11	0.00459041	0.255501	0.299	0.265	1	4	Taf11
CG31030	1.36147e-11	0.255103	0.848	0.799	1.70048e-07	4	CG31030
nudC	0.00481297	0.254122	0.281	0.244	1	4	nudC
Task7	0.000395988	0.253977	0.362	0.312	1	4	Task7
Rpn9	1.40648e-06	0.2534	0.496	0.429	0.017567	4	Rpn9
RpL19	1.79034e-19	0.252706	1	0.943	2.23614e-15	4	RpL19
Scgalpha2	3.15763e-08	0.252576	0.638	0.548	0.000394388	4	Scgalpha
CSN8	2.20267e-05	0.251935	0.482	0.434	0.275113	4	CSN8
Spp1	1.19702e-06	0.251659	0.487	0.423	0.0149508	4	Spp
CG114441	2.64833e-05	0.250997	0.464	0.415	0.330776	4	CG11444
Lar2	9.40038e-13	0.250638	0.929	0.889	1.17411e-08	4	Lar
PDCD-5	0.00164996	0.250339	0.393	0.37	1	4	PDCD-5
CG14184	0.000259853	0.250041	0.259	0.191	1	4	CG14184
RpS23	5.03254e-23	0.250007	1	0.956	6.28564e-19	4	RpS23
CG43689	8.34433e-262	1.64333	0.982	0.134	1.04221e-257	5	CG43689
IRSp53	0	1.63881	0.846	0.06	0	5	IRSp53
CG31814	8.588e-151	1.59657	0.968	0.302	1.07264e-146	5	CG31814
CG144591	8.10528e-194	1.57766	0.973	0.199	1.01235e-189	5	CG14459
Dtg	0	1.50827	0.665	0.042	0	5	Dtg
CG436581	9.22912e-97	1.4353	0.982	0.558	1.15272e-92	5	CG43658
CG8861	3.33163e-107	1.31676	0.964	0.45	4.16121e-103	5	CG8861
DIP-theta	1.10409e-123	1.28482	0.941	0.3	1.37901e-119	5	DIP-theta
CG140821	1.36963e-112	1.27009	0.765	0.215	1.71066e-108	5	CG14082
CG34377	5.05651e-160	1.20944	0.62	0.084	6.31559e-156	5	CG34377
Con1	3.73743e-102	1.20685	1	0.592	4.66805e-98	5	Con
Cow1	1.52356e-99	1.14069	0.991	0.64	1.90292e-95	5	Cow
zfh21	1.56223e-170	1.13999	0.602	0.073	1.95122e-166	5	zfh2
w	2.6306e-56	1.12339	0.751	0.365	3.28562e-52	5	w
disco	5.59274e-170	1.11944	0.638	0.082	6.98534e-166	5	disco
disco-r	8.31916e-168	1.05281	0.593	0.072	1.03906e-163	5	disco-r
CG10011	1.7515e-53	1.0401	0.738	0.395	2.18762e-49	5	CG10011
CG427501	1.73922e-77	1.03657	0.959	0.581	2.17229e-73	5	CG42750
rdgA1	5.76554e-82	1.03372	1	0.668	7.20117e-78	5	rdgA
dpr17	2.21582e-78	1.0224	0.846	0.344	2.76756e-74	5	dpr17
Tsp47F	7.47451e-183	1.00514	0.276	0.011	9.33566e-179	5	Tsp47F
DIP-eta	4.48616e-104	0.997889	0.579	0.115	5.60321e-100	5	DIP-eta
Pxn1	2.62017e-79	0.974918	0.977	0.572	3.27259e-75	5	Pxn
AstC-R21	1.6136e-15	0.950976	0.552	0.399	2.01539e-11	5	AstC-R2
CG448371	2.00057e-57	0.90611	0.738	0.34	2.49871e-53	5	CG44837
CG7220	3.92275e-41	0.896527	0.742	0.491	4.89951e-37	5	CG7220
CG44671	3.72247e-53	0.89159	0.855	0.574	4.64937e-49	5	CG4467
CG343831	7.05111e-60	0.865125	0.923	0.689	8.80683e-56	5	CG34383
mamo2	1.53915e-62	0.844738	0.959	0.5	1.9224e-58	5	mamo
Ten-m1	9.51222e-60	0.841437	0.919	0.59	1.18808e-55	5	Ten-m
cpo	2.41156e-80	0.839159	1	0.9	3.01203e-76	5	cpo
lov	7.80276e-164	0.83181	0.38	0.028	9.74565e-160	5	lov
CG30116	2.2135e-52	0.812297	0.851	0.5	2.76466e-48	5	CG30116
Toll-6	5.00688e-50	0.805081	0.9	0.635	6.25359e-46	5	Toll-6
CG452631	1.68738e-59	0.77546	0.973	0.61	2.10754e-55	5	CG45263
Tsp42El	7.58281e-98	0.774664	0.385	0.053	9.47094e-94	5	Tsp42El
CG156282	1.22844e-44	0.768894	0.824	0.534	1.53432e-40	5	CG15628
CG42541	6.33004e-56	0.753253	0.991	0.79	7.90622e-52	5	CG42541
AstA-R1	2.30701e-52	0.739988	0.498	0.151	2.88146e-48	5	AstA-R1
Ih	8.63967e-43	0.734103	0.891	0.71	1.0791e-38	5	Ih
CG9008	1.09741e-46	0.733564	0.371	0.096	1.37066e-42	5	CG9008
GluClalpha	1.1081e-59	0.731389	0.991	0.867	1.38402e-55	5	GluClalpha
Nlg41	1.53031e-41	0.725826	0.688	0.354	1.91135e-37	5	Nlg4
Snoo1	3.50292e-35	0.721371	0.769	0.488	4.37515e-31	5	Snoo
CG423131	1.10158e-50	0.712141	0.986	0.723	1.37587e-46	5	CG42313
side	3.5307e-54	0.710396	0.968	0.675	4.40985e-50	5	side
Glut4EF	3.91475e-45	0.707074	0.932	0.712	4.88952e-41	5	Glut4EF
CG32204	2.90225e-35	0.68756	0.566	0.249	3.6249e-31	5	CG32204
Imp1	1.14779e-79	0.686902	0.643	0.145	1.4336e-75	5	Imp
CenG1A	2.58234e-32	0.673979	0.489	0.209	3.22534e-28	5	CenG1A
shakB1	1.02273e-72	0.669356	1	0.974	1.27738e-68	5	shakB
scro1	4.29905e-56	0.666034	0.674	0.215	5.36951e-52	5	scro
CG139202	2.24025e-68	0.664328	0.991	0.918	2.79807e-64	5	CG13920
Dys	1.56685e-25	0.662726	0.692	0.483	1.957e-21	5	Dys
CG37261	3.84674e-34	0.655983	0.719	0.385	4.80457e-30	5	CG3726
dmrt99B	1.21175e-131	0.651685	0.367	0.034	1.51347e-127	5	dmrt99B
CR44320	1.15322e-43	0.648666	0.367	0.098	1.44037e-39	5	CR44320
CG48291	3.22237e-33	0.637188	0.561	0.237	4.02474e-29	5	CG4829
SoxN	3.62749e-57	0.632938	0.615	0.173	4.53073e-53	5	SoxN
Hr42	3.7274e-50	0.63105	1	0.891	4.65552e-46	5	Hr4
CR45660	2.11244e-40	0.627906	0.394	0.114	2.63844e-36	5	CR45660
CG316761	9.13609e-45	0.623556	0.679	0.256	1.1411e-40	5	CG31676
rgn1	1.03041e-35	0.616875	0.756	0.424	1.28698e-31	5	rgn
Sema1a1	2.14452e-61	0.616391	0.995	0.942	2.67851e-57	5	Sema1a
CG43795	5.06864e-26	0.615412	0.525	0.262	6.33073e-22	5	CG43795
CG14079	2.46529e-180	0.614286	0.267	0.011	3.07914e-176	5	CG14079
CG157651	7.94738e-42	0.612601	0.905	0.588	9.92627e-38	5	CG15765
CG32683	2.39113e-29	0.608419	0.602	0.306	2.98652e-25	5	CG32683
CG12290	1.03188e-31	0.607892	0.38	0.131	1.28881e-27	5	CG12290
msn	4.42913e-31	0.601338	0.765	0.527	5.53198e-27	5	msn
Bx1	7.17414e-50	0.589856	0.842	0.374	8.9605e-46	5	Bx
toy2	1.22147e-40	0.58937	0.9	0.428	1.52561e-36	5	toy
smal1	3.17088e-23	0.585674	0.719	0.497	3.96043e-19	5	smal
SP1029	2.91194e-55	0.581106	0.299	0.051	3.63702e-51	5	SP1029
TrissinR	2.93346e-14	0.57753	0.416	0.237	3.66389e-10	5	TrissinR
kek3	1.33928e-22	0.572747	0.57	0.33	1.67276e-18	5	kek3
klar	5.73249e-35	0.568247	0.932	0.776	7.15989e-31	5	klar
CG14431	8.7666e-24	0.567758	0.394	0.166	1.09495e-19	5	CG14431
hwt	2.35046e-33	0.566566	0.928	0.779	2.93573e-29	5	hwt
sky1	4.49405e-21	0.560626	0.733	0.568	5.61307e-17	5	sky
S	3.67601e-16	0.556115	0.584	0.417	4.59134e-12	5	S
puc	1.32918e-11	0.552998	0.534	0.376	1.66014e-07	5	puc
ko	5.66799e-36	0.550272	0.312	0.083	7.07932e-32	5	ko
Dop2R	1.56169e-25	0.544343	0.778	0.523	1.95055e-21	5	Dop2R
gpp	5.36739e-23	0.540785	0.792	0.63	6.70387e-19	5	gpp
CG13055	9.59222e-19	0.535171	0.715	0.545	1.19807e-14	5	CG13055
Nlg2	8.09023e-25	0.535039	0.805	0.622	1.01047e-20	5	Nlg2
roX21	8.81451e-37	0.52992	0.955	0.844	1.10093e-32	5	roX2
inaE	8.49242e-21	0.527455	0.679	0.496	1.0607e-16	5	inaE
His3.3B	2.88867e-61	0.520545	1	0.947	3.60795e-57	5	His3.3B
nAChRalpha6	4.50625e-35	0.516169	0.955	0.69	5.6283e-31	5	nAChRalpha6
Ptp99A2	5.25003e-36	0.507566	0.982	0.857	6.55729e-32	5	Ptp99A
tna	3.81685e-32	0.499704	0.977	0.873	4.76725e-28	5	tna
dpr32	1.42187e-20	0.499022	0.48	0.247	1.77592e-16	5	dpr3
dpr111	4.27206e-23	0.495605	0.729	0.471	5.3358e-19	5	dpr11
norpA	2.95102e-19	0.491862	0.719	0.544	3.68582e-15	5	norpA
CG16779	8.6484e-30	0.491273	0.937	0.802	1.08019e-25	5	CG16779
Mbs	5.7592e-22	0.490213	0.665	0.454	7.19325e-18	5	Mbs
beat-Ib	8.07865e-26	0.485472	0.81	0.533	1.00902e-21	5	beat-Ib
CG423401	6.05562e-23	0.481845	0.833	0.636	7.56347e-19	5	CG42340
lbm	4.81187e-15	0.481358	0.294	0.129	6.01003e-11	5	lbm
dnc	1.59463e-30	0.474364	0.964	0.874	1.9917e-26	5	dnc
Hsromega	2.43565e-40	0.4705	1	0.967	3.04212e-36	5	Hsromega
Eip75B2	2.42151e-06	0.467547	0.701	0.729	0.0302447	5	Eip75B
CR45333	2.30394e-21	0.466501	0.43	0.206	2.87762e-17	5	CR45333
mam1	1.07488e-28	0.466195	0.946	0.804	1.34252e-24	5	mam
CR45332	2.63405e-19	0.463537	0.57	0.341	3.28992e-15	5	CR45332
alc	3.74819e-17	0.463265	0.633	0.453	4.68149e-13	5	alc
CG341551	1.94253e-22	0.46304	0.679	0.389	2.42622e-18	5	CG34155
CG8910	3.7068e-11	0.454157	0.434	0.286	4.62979e-07	5	CG8910
qvr	1.32145e-30	0.453317	0.955	0.85	1.65049e-26	5	qvr
dpr6	1.568e-16	0.451043	0.738	0.561	1.95843e-12	5	dpr6
Syx1A	1.05409e-41	0.448451	0.991	0.943	1.31656e-37	5	Syx1A
trv1	9.02063e-35	0.444648	1	0.902	1.12668e-30	5	trv
numb	6.04218e-11	0.444368	0.48	0.353	7.54669e-07	5	numb
Rbp61	6.41068e-38	0.443733	0.986	0.844	8.00694e-34	5	Rbp6
kug	8.20632e-11	0.443109	0.575	0.425	1.02497e-06	5	kug
CG33229	2.27505e-12	0.438574	0.638	0.516	2.84153e-08	5	CG33229
GFP1	4.91855e-08	0.435384	0.751	0.747	0.000614327	5	GFP
Octbeta2R	1.58905e-26	0.430944	0.765	0.471	1.98473e-22	5	Octbeta2R
CG34347	4.09826e-15	0.430821	0.389	0.2	5.11873e-11	5	CG34347
CG17778	8.95576e-14	0.428709	0.638	0.505	1.11857e-09	5	CG17778
mGluR1	7.48214e-16	0.424226	0.52	0.311	9.3452e-12	5	mGluR
tutl1	2.20302e-25	0.420155	0.982	0.855	2.75158e-21	5	tutl
eag	4.12099e-14	0.408416	0.606	0.437	5.14712e-10	5	eag
bin3	8.07269e-12	0.405524	0.52	0.381	1.00828e-07	5	bin3
CG42663	2.98828e-08	0.401357	0.376	0.255	0.000373236	5	CG42663
CG43143	3.73567e-11	0.399621	0.62	0.492	4.66585e-07	5	CG43143
CG13893	3.41774e-06	0.399522	0.276	0.184	0.0426875	5	CG13893
eIF4EHP	1.95187e-16	0.39873	0.882	0.781	2.43788e-12	5	eIF4EHP
nAChRalpha7	7.3664e-29	0.397559	0.959	0.771	9.20064e-25	5	nAChRalpha7
CG9328	1.89815e-08	0.397143	0.421	0.308	0.000237079	5	CG9328
para1	6.35557e-37	0.393536	1	0.963	7.93811e-33	5	para
CG44153	7.98566e-15	0.391544	0.692	0.5	9.97409e-11	5	CG44153
Src64B	2.97403e-08	0.391122	0.534	0.45	0.000371456	5	Src64B
CG34114	1.96639e-17	0.387844	0.819	0.623	2.45603e-13	5	CG34114
beat-IV2	2.71267e-10	0.383954	0.443	0.293	3.38812e-06	5	beat-IV
CG316901	3.35829e-11	0.380165	0.475	0.323	4.1945e-07	5	CG31690
crb	3.46047e-15	0.378807	0.258	0.103	4.32213e-11	5	crb
CG18265	7.1897e-13	0.377386	0.357	0.186	8.97993e-09	5	CG18265
CG150971	2.45513e-06	0.373214	0.371	0.277	0.0306646	5	CG15097
chinmo1	2.38186e-21	0.372895	0.977	0.896	2.97494e-17	5	chinmo
dpr2	3.85252e-09	0.372089	0.412	0.284	4.8118e-05	5	dpr2
eIF4A	1.00087e-38	0.367942	0.995	0.965	1.25009e-34	5	eIF4A
Prosap	4.06075e-24	0.365737	0.986	0.921	5.07188e-20	5	Prosap
Frq21	4.05628e-16	0.362007	0.824	0.638	5.0663e-12	5	Frq2
ringer1	1.16261e-15	0.360312	0.964	0.891	1.45211e-11	5	ringer
Eip63E	4.96039e-12	0.356561	0.76	0.634	6.19553e-08	5	Eip63E
sbb1	1.15976e-31	0.355599	0.991	0.918	1.44854e-27	5	sbb
RASSF8	4.21817e-12	0.351672	0.71	0.606	5.26849e-08	5	RASSF8
Dlic	9.48109e-06	0.346842	0.462	0.404	0.118419	5	Dlic
kek6	3.59993e-06	0.3451	0.439	0.36	0.0449632	5	kek6
tok1	8.76989e-13	0.3408	0.457	0.271	1.09536e-08	5	tok
CG14509	2.60885e-25	0.33866	0.964	0.814	3.25845e-21	5	CG14509
kuz	8.35385e-15	0.33635	0.819	0.698	1.04339e-10	5	kuz
emc2	6.86065e-13	0.334322	0.76	0.591	8.56895e-09	5	emc
tai	5.07534e-09	0.333087	0.729	0.658	6.3391e-05	5	tai
CG11191	2.5359e-05	0.333077	0.394	0.313	0.316734	5	CG11191
CG8500	2.03992e-08	0.329705	0.566	0.481	0.000254786	5	CG8500
CG304631	9.93774e-18	0.322885	0.801	0.581	1.24122e-13	5	CG30463
nAChRalpha31	8.57017e-11	0.321349	0.615	0.462	1.07041e-06	5	nAChRalpha3
Ephrin	5.9661e-07	0.318821	0.543	0.466	0.00745166	5	Ephrin
CG63291	3.46281e-27	0.315954	0.991	0.939	4.32506e-23	5	CG6329
CG3104	3.00314e-06	0.315072	0.357	0.262	0.0375092	5	CG3104
CG177161	2.79347e-20	0.313761	0.846	0.586	3.48904e-16	5	CG17716
Gug	5.037e-13	0.311352	0.792	0.707	6.29121e-09	5	Gug
Dat1	2.84065e-09	0.304543	0.584	0.409	3.54797e-05	5	Dat
Pka-C1	6.30013e-28	0.304392	0.986	0.872	7.86886e-24	5	Pka-C1
lilli	1.81705e-08	0.302099	0.656	0.592	0.000226949	5	lilli
tapas	1.16753e-06	0.299999	0.448	0.365	0.0145824	5	tapas
Dscam21	3.69848e-26	0.297822	0.995	0.939	4.6194e-22	5	Dscam2
CG14207	0.000106489	0.292431	0.416	0.361	1	5	CG14207
CG4238	0.00189841	0.29217	0.262	0.212	1	5	CG4238
NaCP60E	3.05035e-13	0.288772	0.873	0.81	3.80988e-09	5	NaCP60E
AdipoR	3.16884e-08	0.288712	0.584	0.508	0.000395788	5	AdipoR
lbk2	7.78757e-14	0.286974	0.701	0.522	9.72667e-10	5	lbk
br	4.54766e-31	0.286595	0.507	0.177	5.68003e-27	5	br
RpL26	1.34131e-25	0.285098	0.991	0.958	1.6753e-21	5	RpL26
Atox12	3.70049e-18	0.284063	0.982	0.911	4.62191e-14	5	Atox1
l(3)neo381	9.81432e-09	0.283913	0.529	0.39	0.000122581	5	l(3)neo38
Nckx30C1	9.63516e-13	0.283593	0.946	0.84	1.20343e-08	5	Nckx30C
CG32486	3.26864e-05	0.283318	0.462	0.404	0.408254	5	CG32486
arr	8.93532e-07	0.283298	0.299	0.186	0.0111602	5	arr
beat-Va1	9.75351e-08	0.280185	0.475	0.35	0.00121821	5	beat-Va
CG11486	2.61567e-08	0.278112	0.81	0.724	0.000326697	5	CG11486
CR42862	6.82591e-17	0.27674	0.977	0.898	8.52556e-13	5	CR42862
LRR	7.47522e-07	0.275994	0.511	0.432	0.00933655	5	LRR
tinc	6.00652e-06	0.275364	0.516	0.436	0.0750215	5	tinc
vimar	1.65502e-06	0.274857	0.262	0.162	0.0206713	5	vimar
tou	1.41868e-05	0.274799	0.548	0.509	0.177194	5	tou
CG42668	3.26543e-06	0.272823	0.588	0.542	0.0407852	5	CG42668
Dgk	9.79265e-05	0.272193	0.294	0.215	1	5	Dgk
Syx6	0.00188767	0.270663	0.471	0.469	1	5	Syx6
cac	5.43742e-19	0.270354	0.986	0.94	6.79134e-15	5	cac
Dad	0.000999592	0.268759	0.371	0.327	1	5	Dad
Hsp831	3.93859e-06	0.267095	0.873	0.854	0.049193	5	Hsp83
Tpr2	0.000257201	0.266672	0.443	0.4	1	5	Tpr2
dpr132	8.90797e-13	0.2665	0.86	0.648	1.11261e-08	5	dpr13
beat-Ic1	5.10216e-11	0.262664	0.67	0.482	6.3726e-07	5	beat-Ic
Hsp67Bc2	4.50082e-16	0.262658	1	0.989	5.62152e-12	5	Hsp67Bc
lola	6.1516e-11	0.261105	0.914	0.852	7.68335e-07	5	lola
pan	6.71429e-15	0.259824	0.955	0.899	8.38615e-11	5	pan
rudhira	1.42725e-06	0.259006	0.688	0.645	0.0178263	5	rudhira
CG33181	0.000130671	0.255629	0.416	0.342	1	5	CG33181
RpS9	1.40221e-19	0.255417	0.982	0.946	1.75136e-15	5	RpS9
Socs36E	0.00290701	0.253743	0.443	0.426	1	5	Socs36E
RpL15	8.13623e-23	0.252016	0.986	0.962	1.01622e-18	5	RpL15
CG14414	7.84384e-05	0.251901	0.489	0.442	0.979696	5	CG14414
Tsp66E2	1.7305e-13	0.251064	0.941	0.83	2.1614e-09	5	Tsp66E
CG436891	3.96813e-264	1.76527	0.981	0.135	4.95619e-260	6	CG43689
CG436582	2.58955e-111	1.5752	0.991	0.558	3.23435e-107	6	CG43658
klg2	6.44783e-126	1.55074	1	0.76	8.05334e-122	6	klg
DIP-theta1	7.78959e-138	1.43187	0.972	0.3	9.7292e-134	6	DIP-theta
CG144592	6.23716e-165	1.30778	0.944	0.201	7.79022e-161	6	CG14459
disco1	1.82932e-219	1.23867	0.724	0.081	2.28482e-215	6	disco
CG88611	7.7708e-103	1.20774	0.991	0.45	9.70573e-99	6	CG8861
disco-r1	2.8159e-259	1.16322	0.734	0.068	3.51706e-255	6	disco-r
IRSp531	3.23749e-273	1.15051	0.729	0.064	4.04362e-269	6	IRSp53
Fas31	5.51557e-86	1.03148	0.967	0.43	6.88895e-82	6	Fas3
beat-IIa	1.33794e-75	1.02077	0.883	0.425	1.67109e-71	6	beat-IIa
CG100111	7.69149e-72	0.983585	0.85	0.392	9.60667e-68	6	CG10011
side1	1.3695e-82	0.9778	0.995	0.674	1.7105e-78	6	side
CG343771	1.09677e-131	0.969979	0.589	0.085	1.36987e-127	6	CG34377
CR44366	0	0.957097	0.495	0.021	0	6	CR44366
CG343832	2.22933e-73	0.957059	0.977	0.688	2.78444e-69	6	CG34383
CR44978	7.46125e-54	0.932095	0.673	0.262	9.3191e-50	6	CR44978
Mkp3	7.27229e-14	0.894903	0.645	0.521	9.08309e-10	6	Mkp3
CG427502	2.18765e-65	0.894685	0.953	0.582	2.73238e-61	6	CG42750
Syp1	4.17587e-83	0.886018	1	0.914	5.21566e-79	6	Syp
crb1	4.50294e-107	0.854895	0.547	0.095	5.62417e-103	6	crb
CG316762	1.38021e-87	0.850302	0.855	0.252	1.72388e-83	6	CG31676
CG111911	1.54594e-52	0.848232	0.692	0.304	1.93087e-48	6	CG11191
wry1	8.7363e-61	0.832595	0.963	0.594	1.09116e-56	6	wry
Cow2	6.83615e-65	0.824752	0.986	0.641	8.53835e-61	6	Cow
CG425411	6.02923e-64	0.818994	1	0.79	7.53051e-60	6	CG42541
CG177781	3.91849e-46	0.818798	0.832	0.5	4.89419e-42	6	CG17778
rdgA2	1.1524e-49	0.80932	0.963	0.669	1.43935e-45	6	rdgA
lbk3	9.62934e-54	0.804833	0.902	0.516	1.2027e-49	6	lbk
SoxN1	1.55108e-97	0.802184	0.757	0.169	1.9373e-93	6	SoxN
Eip93F1	3.66852e-67	0.797245	0.991	0.48	4.58198e-63	6	Eip93F
nAChRalpha32	2.95163e-56	0.786792	0.874	0.455	3.68659e-52	6	nAChRalpha3
dpr22	1.19076e-53	0.780397	0.678	0.277	1.48726e-49	6	dpr2
dpr33	3.4153e-54	0.747339	0.654	0.242	4.26571e-50	6	dpr3
Trim92	1.14439e-51	0.747164	0.902	0.484	1.42935e-47	6	Trim9
CG140822	4.57954e-45	0.746271	0.589	0.22	5.71985e-41	6	CG14082
CG44672	5.09295e-47	0.74295	0.874	0.574	6.3611e-43	6	CG4467
Ten-m2	1.44026e-51	0.726268	0.944	0.59	1.79888e-47	6	Ten-m
CG448372	1.88719e-51	0.716839	0.752	0.34	2.3571e-47	6	CG44837
cpo1	1.25436e-67	0.707961	1	0.9	1.5667e-63	6	cpo
TrissinR1	7.0352e-37	0.707942	0.565	0.233	8.78696e-33	6	TrissinR
puc1	3.46797e-23	0.707595	0.621	0.374	4.33149e-19	6	puc
CG157652	4.67841e-54	0.706174	0.967	0.586	5.84334e-50	6	CG15765
Fife	9.70954e-43	0.701907	0.813	0.425	1.21272e-38	6	Fife
CG32354	1.94203e-68	0.684241	0.364	0.063	2.4256e-64	6	CG32354
Sema1a2	1.14912e-65	0.66251	1	0.942	1.43525e-61	6	Sema1a
dmrt99B1	1.09301e-126	0.644699	0.369	0.034	1.36517e-122	6	dmrt99B
Dtg1	7.73523e-96	0.634375	0.393	0.05	9.66131e-92	6	Dtg
CG44422	1.07895e-37	0.63029	0.85	0.502	1.34761e-33	6	CG44422
CG426631	9.85275e-33	0.628188	0.556	0.25	1.23061e-28	6	CG42663
beat-IIb1	8.37853e-35	0.627535	0.603	0.283	1.04648e-30	6	beat-IIb
Ih1	8.35672e-38	0.621725	0.925	0.709	1.04375e-33	6	Ih
Myo10A	5.73182e-88	0.595292	0.271	0.027	7.15905e-84	6	Myo10A
tok2	2.70717e-40	0.593865	0.636	0.266	3.38125e-36	6	tok
lbm1	9.77252e-32	0.592316	0.383	0.127	1.22059e-27	6	lbm
CG15927	2.4249e-260	0.587093	0.294	0.007	3.0287e-256	6	CG15927
alc1	7.0384e-33	0.576247	0.766	0.449	8.79096e-29	6	alc
kug1	1.2561e-28	0.56281	0.729	0.421	1.56887e-24	6	kug
CR46006	2.98102e-34	0.562024	0.523	0.193	3.72329e-30	6	CR46006
cindr	9.06661e-27	0.557389	0.804	0.59	1.13242e-22	6	cindr
kek61	1.27211e-22	0.555833	0.598	0.356	1.58886e-18	6	kek6
Lmpt	6.274e-38	0.554228	0.481	0.164	7.83622e-34	6	Lmpt
Rgk3	3.26711e-24	0.549627	0.636	0.355	4.08062e-20	6	Rgk3
Nna11	5.54496e-57	0.54147	0.411	0.088	6.92566e-53	6	Nna1
CG301161	3.30091e-31	0.535777	0.818	0.502	4.12284e-27	6	CG30116
Pka-C11	5.13091e-59	0.532824	1	0.872	6.40851e-55	6	Pka-C1
Tsp42El1	6.87107e-63	0.526632	0.327	0.055	8.58196e-59	6	Tsp42El
CG11221	1.03611e-15	0.520042	0.341	0.159	1.29411e-11	6	CG11221
Toll-61	1.53267e-35	0.509939	0.925	0.635	1.91431e-31	6	Toll-6
jp	1.68752e-19	0.506934	0.472	0.253	2.10771e-15	6	jp
Hr43	4.99871e-34	0.504135	0.991	0.892	6.24339e-30	6	Hr4
CG130551	1.77461e-18	0.485162	0.743	0.544	2.21649e-14	6	CG13055
Dscam22	7.06696e-47	0.483882	1	0.939	8.82663e-43	6	Dscam2
para2	5.33109e-48	0.48223	0.995	0.963	6.65853e-44	6	para
CG145091	1.84261e-36	0.477846	0.986	0.814	2.30142e-32	6	CG14509
Syx1A1	1.9977e-49	0.47731	1	0.943	2.49513e-45	6	Syx1A
scro2	3.33004e-40	0.472554	0.64	0.217	4.15921e-36	6	scro
AstC	3.02485e-88	0.467069	0.252	0.022	3.77804e-84	6	AstC
smal2	2.77923e-24	0.461917	0.78	0.495	3.47126e-20	6	smal
CG12643	6.46734e-17	0.45907	0.575	0.354	8.07771e-13	6	CG12643
CG326831	1.0747e-24	0.458325	0.603	0.307	1.3423e-20	6	CG32683
Atox13	1.7203e-42	0.455798	0.995	0.91	2.14865e-38	6	Atox1
Dys1	7.90303e-23	0.454815	0.743	0.482	9.87088e-19	6	Dys
GluClalpha1	1.45559e-27	0.454215	0.995	0.867	1.81803e-23	6	GluClalpha
shakB2	1.90385e-50	0.452951	1	0.974	2.37791e-46	6	shakB
CG326981	3.3784e-29	0.452769	0.645	0.295	4.21962e-25	6	CG32698
Dat2	3.16388e-26	0.452135	0.743	0.405	3.95168e-22	6	Dat
ko1	1.92675e-36	0.452056	0.322	0.083	2.40651e-32	6	ko
CG139203	9.20801e-43	0.450296	0.995	0.918	1.15008e-38	6	CG13920
sky2	5.27149e-23	0.450036	0.822	0.565	6.58409e-19	6	sky
Tk	9.9989e-67	0.442509	0.318	0.047	1.24886e-62	6	Tk		Asahina, K., Watanabe, K., Duistermars, B.J., Hoopfer, E., Gonzalez, C.R., Eyjolfsdottir, E.A., Perona, P., and Anderson, D.J. (2014). Tachykinin-Expressing Neurons Control Male-Specific Aggressive Arousal in Drosophila. Cell 156, 221-235. 10.1016/j.cell.2013.11.045.
roX22	1.77298e-30	0.438596	0.967	0.844	2.21445e-26	6	roX2
br1	3.23666e-48	0.435934	0.598	0.175	4.04259e-44	6	br
CAP	1.55978e-33	0.425629	0.364	0.108	1.94817e-29	6	CAP
FMRFaR1	4.19996e-13	0.422183	0.453	0.259	5.24575e-09	6	FMRFaR
klar1	1.02816e-22	0.421014	0.916	0.776	1.28417e-18	6	klar
pyd1	1.82349e-16	0.413611	0.682	0.445	2.27753e-12	6	pyd
CG167791	1.3267e-26	0.413571	0.963	0.801	1.65705e-22	6	CG16779
RASSF81	3.62438e-15	0.413375	0.738	0.605	4.52686e-11	6	RASSF8
CG316902	2.98534e-20	0.408327	0.57	0.32	3.72869e-16	6	CG31690
Frq22	3.78527e-21	0.407479	0.86	0.638	4.7278e-17	6	Frq2
Tsp66E3	1.4966e-26	0.407282	0.995	0.828	1.86925e-22	6	Tsp66E
bru11	1.95136e-18	0.405483	0.514	0.269	2.43725e-14	6	bru1
CG42260	2.42815e-22	0.402385	0.939	0.741	3.03276e-18	6	CG42260
Dlic1	8.12718e-12	0.398068	0.551	0.402	1.01508e-07	6	Dlic
Hs3st-A1	1.95093e-18	0.397064	0.879	0.668	2.43671e-14	6	Hs3st-A
eIF4EHP1	6.09287e-23	0.396653	0.939	0.78	7.61e-19	6	eIF4EHP
twz1	2.39351e-30	0.395524	0.65	0.298	2.98949e-26	6	twz
scrt	3.66819e-27	0.393527	0.995	0.886	4.58156e-23	6	scrt
CG172701	1.94183e-27	0.382898	0.972	0.817	2.42534e-23	6	CG17270
Exn	3.34065e-19	0.376654	0.271	0.097	4.17248e-15	6	Exn
St31	1.93369e-10	0.374909	0.547	0.387	2.41518e-06	6	St3
Nlg21	1.1864e-14	0.374006	0.804	0.622	1.48181e-10	6	Nlg2
CR45347	3.32249e-25	0.37348	0.304	0.096	4.14979e-21	6	CR45347
CG423402	2.58333e-13	0.371442	0.808	0.636	3.22658e-09	6	CG42340
Eip78C1	5.86442e-14	0.359108	0.846	0.725	7.32467e-10	6	Eip78C
nAChRalpha71	1.79549e-22	0.354955	0.967	0.771	2.24257e-18	6	nAChRalpha7
tld	8.07343e-20	0.3472	0.262	0.085	1.00837e-15	6	tld
ftz-f1	1.28757e-12	0.345622	0.519	0.317	1.60818e-08	6	ftz-f1
qvr1	1.01222e-18	0.345137	0.949	0.85	1.26427e-14	6	qvr
Sf3b6	1.90471e-10	0.34488	0.743	0.622	2.37898e-06	6	Sf3b6
RpL261	7.22291e-39	0.343674	0.986	0.959	9.02142e-35	6	RpL26
Prosap1	1.85875e-27	0.343006	0.991	0.921	2.32158e-23	6	Prosap
RpL36	5.23362e-34	0.34166	0.977	0.941	6.53679e-30	6	RpL36
tipE	3.72642e-12	0.341218	0.533	0.363	4.6543e-08	6	tipE
Glut4EF1	6.01605e-13	0.336463	0.841	0.714	7.51404e-09	6	Glut4EF
Nlg42	1.64925e-18	0.331201	0.607	0.357	2.05992e-14	6	Nlg4
CG331811	3.90952e-12	0.328956	0.528	0.339	4.88299e-08	6	CG33181
CG31041	6.65411e-09	0.325366	0.397	0.261	8.31099e-05	6	CG3104
cac1	1.97955e-26	0.323678	1	0.94	2.47246e-22	6	cac
Rbfox1	1.00223e-24	0.314593	1	0.953	1.25179e-20	6	Rbfox1
DOR	2.9876e-11	0.313489	0.78	0.666	3.73151e-07	6	DOR
trv2	2.43087e-24	0.313056	1	0.902	3.03615e-20	6	trv
CR46003	4.35309e-13	0.307937	0.285	0.122	5.437e-09	6	CR46003
CG42524	1.06538e-08	0.306217	0.364	0.228	0.000133066	6	CG42524
Gug1	6.58234e-14	0.305959	0.85	0.705	8.22134e-10	6	Gug
CenG1A1	2.0364e-10	0.300795	0.374	0.213	2.54346e-06	6	CenG1A
mbl2	4.02166e-29	0.298533	0.986	0.684	5.02306e-25	6	mbl
eag1	6.77242e-09	0.297142	0.575	0.438	8.45875e-05	6	eag
CG5065	1.81847e-08	0.293183	0.715	0.587	0.000227127	6	CG5065
numb1	2.17794e-10	0.29088	0.514	0.352	2.72024e-06	6	numb
msn1	2.28316e-10	0.289913	0.668	0.53	2.85166e-06	6	msn
CG17816	3.81423e-16	0.28859	0.958	0.84	4.76397e-12	6	CG17816
CG304632	5.11418e-19	0.287953	0.855	0.58	6.38762e-15	6	CG30463
Pxn2	3.50699e-17	0.285826	0.841	0.577	4.38024e-13	6	Pxn
flw	2.44619e-10	0.284325	0.71	0.587	3.05529e-06	6	flw
sdt1	1.12679e-11	0.281005	0.879	0.749	1.40736e-07	6	sdt
Snoo2	2.10464e-11	0.280989	0.668	0.491	2.62869e-07	6	Snoo
AstA-R11	7.68707e-15	0.277467	0.35	0.156	9.60116e-11	6	AstA-R1
kek31	1.49182e-10	0.273012	0.514	0.332	1.86329e-06	6	kek3
chinmo2	5.42753e-16	0.272761	0.986	0.896	6.77898e-12	6	chinmo
Tango13	1.14283e-06	0.272121	0.262	0.156	0.0142739	6	Tango13
beat-Ib1	1.51381e-14	0.2718	0.808	0.533	1.89075e-10	6	beat-Ib
RpL23	7.47647e-32	0.270897	1	0.971	9.33811e-28	6	RpL23
arr1	1.18936e-09	0.269142	0.336	0.185	1.48551e-05	6	arr
ham2	7.63087e-24	0.268556	0.542	0.211	9.53096e-20	6	ham
Hk	6.70572e-12	0.267634	0.879	0.74	8.37545e-08	6	Hk
mub	6.21846e-20	0.26582	0.995	0.892	7.76686e-16	6	mub
Dad2	1.81488e-09	0.263694	0.477	0.324	2.26678e-05	6	Dad
RpL31	1.58394e-21	0.262291	0.986	0.942	1.97835e-17	6	RpL31
dpr112	6.22945e-11	0.261629	0.682	0.472	7.78058e-07	6	dpr11
gpp1	1.81251e-09	0.261248	0.757	0.631	2.26383e-05	6	gpp
pan1	1.93386e-16	0.261215	0.967	0.899	2.41539e-12	6	pan
CG341141	2.12052e-11	0.260768	0.832	0.622	2.64853e-07	6	CG34114
CG142071	3.47359e-07	0.256407	0.477	0.36	0.00433851	6	CG14207
Syt12	4.90663e-08	0.255528	0.453	0.317	0.000612839	6	Syt12
CR453321	1.25272e-10	0.25447	0.519	0.342	1.56464e-06	6	CR45332
cdi1	1.17601e-10	0.253967	0.804	0.693	1.46884e-06	6	cdi
CG436892	1.07683e-242	1.61618	0.99	0.136	1.34496e-238	7	CG43689
CG15082	0	1.50343	0.493	0.016	0	7	CG15082
w1	1.25083e-94	1.43896	0.911	0.362	1.56229e-90	7	w
CG316763	4.37408e-126	1.33263	0.936	0.251	5.46323e-122	7	CG31676
DIP-theta2	4.27274e-114	1.21164	0.961	0.301	5.33665e-110	7	DIP-theta
disco2	1.22557e-224	1.1975	0.754	0.081	1.53074e-220	7	disco
disco-r2	5.48602e-231	1.04975	0.724	0.069	6.85204e-227	7	disco-r
CG111912	6.72983e-92	1.04592	0.857	0.301	8.40555e-88	7	CG11191
CG144593	8.35259e-116	1.01895	0.882	0.203	1.04324e-111	7	CG14459
Eip93F2	1.00077e-78	0.993409	0.985	0.48	1.24996e-74	7	Eip93F
SoxN2	7.02146e-133	0.984677	0.862	0.167	8.7698e-129	7	SoxN
rgn2	9.90549e-65	0.968432	0.897	0.421	1.2372e-60	7	rgn
CG423403	1.19337e-65	0.924205	0.951	0.633	1.49051e-61	7	CG42340
cpo2	5.13857e-84	0.904694	1	0.9	6.41808e-80	7	cpo
Trim93	1.04727e-57	0.877152	0.906	0.485	1.30803e-53	7	Trim9
fz21	1.53888e-55	0.828307	0.98	0.747	1.92207e-51	7	fz2
Pxn3	1.15443e-43	0.760284	0.921	0.575	1.44188e-39	7	Pxn
Sox21b	3.06159e-193	0.751918	0.547	0.046	3.82393e-189	7	Sox21b
Cbp53E2	1.0505e-61	0.751155	0.931	0.465	1.31207e-57	7	Cbp53E
Syp2	2.81343e-70	0.738272	0.995	0.915	3.51397e-66	7	Syp
CG17839	1.01572e-44	0.693049	0.739	0.309	1.26864e-40	7	CG17839
CG2201	7.27177e-41	0.687565	0.66	0.271	9.08244e-37	7	CG2201
klar2	6.64922e-50	0.683163	0.975	0.775	8.30488e-46	7	klar
dlp1	1.12633e-46	0.677266	0.527	0.164	1.40679e-42	7	dlp
CG102832	4.66056e-55	0.652924	0.586	0.177	5.82103e-51	7	CG10283
FMRFaR2	2.42456e-32	0.648748	0.591	0.256	3.02827e-28	7	FMRFaR
Eip78C2	4.35891e-41	0.646839	0.941	0.723	5.44428e-37	7	Eip78C
CG100112	3.8371e-37	0.642143	0.759	0.395	4.79254e-33	7	CG10011
rdgA3	1.20147e-39	0.637627	0.99	0.669	1.50064e-35	7	rdgA
CG12065	3.66808e-70	0.6313	0.414	0.072	4.58143e-66	7	CG12065
dpr34	2.665e-42	0.63111	0.631	0.243	3.32859e-38	7	dpr3
kek32	1.05554e-39	0.629243	0.734	0.326	1.31837e-35	7	kek3
GFP2	2.7369e-33	0.622947	0.936	0.742	3.41839e-29	7	GFP
D	3.66085e-116	0.604552	0.404	0.042	4.5724e-112	7	D
trv3	1.07017e-51	0.591982	0.995	0.902	1.33664e-47	7	trv
alc2	1.58576e-30	0.573765	0.773	0.45	1.98061e-26	7	alc
Rgk31	1.33075e-33	0.563329	0.729	0.353	1.66211e-29	7	Rgk3
Sema1a3	1.78727e-44	0.562899	0.995	0.942	2.2323e-40	7	Sema1a
CG6006	4.86939e-59	0.555343	0.394	0.08	6.08187e-55	7	CG6006
CG124841	1.61431e-32	0.54921	0.635	0.275	2.01627e-28	7	CG12484
MRE161	3.75986e-39	0.546425	0.975	0.953	4.69607e-35	7	MRE16
bab2	1.29744e-38	0.542986	0.567	0.201	1.62051e-34	7	bab2
Toll-62	4.63365e-21	0.539775	0.872	0.636	5.78743e-17	7	Toll-6
Tsp66E4	5.52218e-36	0.529704	0.98	0.829	6.8972e-32	7	Tsp66E
CG16881	6.93591e-28	0.526645	0.562	0.246	8.66295e-24	7	CG1688
Dat3	9.10206e-37	0.517533	0.842	0.403	1.13685e-32	7	Dat
Fas32	2.58179e-34	0.515476	0.867	0.434	3.22466e-30	7	Fas3
Sf3b61	3.55449e-27	0.513069	0.872	0.618	4.43956e-23	7	Sf3b6
shakB3	1.53475e-49	0.511611	1	0.974	1.9169e-45	7	shakB
dmrt99B2	1.59576e-120	0.502529	0.374	0.034	1.99311e-116	7	dmrt99B
bab1	7.8332e-60	0.499347	0.453	0.097	9.78367e-56	7	bab1
eys	5.89946e-34	0.491307	0.946	0.556	7.36843e-30	7	eys
jp1	1.04615e-22	0.490661	0.522	0.252	1.30664e-18	7	jp
Tpr21	1.49486e-22	0.487999	0.67	0.394	1.86708e-18	7	Tpr2
CG139204	3.06283e-43	0.487297	0.98	0.918	3.82547e-39	7	CG13920
beat-IIIb2	1.25714e-27	0.484862	0.862	0.503	1.57017e-23	7	beat-IIIb
CG172702	8.73689e-33	0.481593	0.956	0.817	1.09124e-28	7	CG17270
CG44673	3.73551e-27	0.479774	0.857	0.575	4.66565e-23	7	CG4467
CG448373	2.9425e-21	0.4787	0.631	0.344	3.67519e-17	7	CG44837
Rim	1.41289e-36	0.47852	0.99	0.86	1.76471e-32	7	Rim
pyd2	5.04871e-20	0.472859	0.709	0.444	6.30584e-16	7	pyd
dpr61	4.26291e-26	0.472132	0.867	0.558	5.32437e-22	7	dpr6
CG423132	6.62126e-25	0.463649	0.956	0.724	8.26996e-21	7	CG42313
CR456601	1.64551e-33	0.46067	0.394	0.115	2.05524e-29	7	CR45660
GstD1	7.01931e-57	0.459571	0.374	0.071	8.76711e-53	7	GstD1
CG12567	1.42899e-11	0.457302	0.394	0.219	1.7848e-07	7	CG12567
CG177782	2.53041e-18	0.455536	0.744	0.503	3.16049e-14	7	CG17778
CG34354	1.34743e-27	0.451743	0.936	0.692	1.68294e-23	7	CG34354
crb2	1.28329e-28	0.451397	0.34	0.101	1.60283e-24	7	crb
bi1	1.17604e-63	0.446052	0.901	0.276	1.46887e-59	7	bi
CG89101	3.28909e-21	0.445727	0.562	0.283	4.10808e-17	7	CG8910
CG304633	2.51009e-23	0.44464	0.862	0.58	3.1351e-19	7	CG30463
Hr44	1.08851e-34	0.439214	0.995	0.892	1.35955e-30	7	Hr4
Ten-m3	3.70181e-25	0.438532	0.892	0.592	4.62356e-21	7	Ten-m
CG326982	2.27735e-32	0.43553	0.685	0.294	2.84441e-28	7	CG32698
CG34370	3.43026e-26	0.418773	0.581	0.262	4.28439e-22	7	CG34370
CR44628	2.58114e-51	0.416449	0.325	0.06	3.22384e-47	7	CR44628
scrt1	2.3477e-26	0.411744	0.99	0.886	2.93228e-22	7	scrt
CG31475	2.8782e-24	0.409359	0.468	0.191	3.59487e-20	7	CG31475
tud	3.19509e-16	0.403954	0.635	0.396	3.99066e-12	7	tud
CG112211	6.23608e-19	0.398072	0.379	0.158	7.78887e-15	7	CG11221
tou1	4.6897e-16	0.396001	0.739	0.504	5.85743e-12	7	tou
rho	2.44343e-22	0.395935	0.463	0.199	3.05185e-18	7	rho
CG150972	4.20564e-14	0.394332	0.483	0.274	5.25284e-10	7	CG15097
tinc1	1.29556e-15	0.391156	0.685	0.432	1.61815e-11	7	tinc
Cow3	1.08508e-20	0.390923	0.901	0.644	1.35526e-16	7	Cow
orb	1.95201e-17	0.390877	0.369	0.162	2.43805e-13	7	orb
dpr51	6.8649e-22	0.389456	0.665	0.347	8.57426e-18	7	dpr5
St32	1.22772e-19	0.389452	0.675	0.384	1.53342e-15	7	St3
CG126431	1.73583e-23	0.379686	0.67	0.352	2.16805e-19	7	CG12643
ringer2	3.51395e-24	0.377514	0.951	0.891	4.38892e-20	7	ringer
CG142072	1.41072e-16	0.376154	0.596	0.357	1.76199e-12	7	CG14207
arr2	1.17005e-18	0.373879	0.419	0.183	1.46139e-14	7	arr
dpr23	1.84302e-20	0.368915	0.562	0.28	2.30194e-16	7	dpr2
CG341131	6.01671e-25	0.364634	0.956	0.699	7.51487e-21	7	CG34113
Hsp272	2.08234e-13	0.360295	0.867	0.659	2.60085e-09	7	Hsp27
Syt121	1.43366e-15	0.360084	0.552	0.315	1.79065e-11	7	Syt12
Rbfox11	1.16388e-29	0.355693	1	0.953	1.45369e-25	7	Rbfox1
scro3	4.22498e-37	0.354447	0.66	0.217	5.277e-33	7	scro
ND-151	7.18275e-18	0.353113	0.887	0.696	8.97126e-14	7	ND-15
Meltrin	6.17386e-12	0.352793	0.468	0.271	7.71115e-08	7	Meltrin
Tsp39D1	2.17056e-18	0.351367	0.951	0.836	2.71103e-14	7	Tsp39D
kek62	6.60004e-11	0.350477	0.542	0.357	8.24345e-07	7	kek6
bol	2.40522e-15	0.349858	0.936	0.795	3.00412e-11	7	bol
beat-IV3	1.89803e-13	0.347264	0.522	0.291	2.37064e-09	7	beat-IV
Atox14	4.87877e-26	0.347137	0.98	0.911	6.09359e-22	7	Atox1
CG425241	6.36004e-09	0.346267	0.384	0.228	7.9437e-05	7	CG42524
Syn11	3.36618e-17	0.345173	0.921	0.798	4.20436e-13	7	Syn1
Frq23	5.30319e-11	0.341245	0.833	0.639	6.62368e-07	7	Frq2
CR453322	6.12603e-24	0.339848	0.685	0.338	7.65141e-20	7	CR45332
Dtg2	1.71129e-33	0.337524	0.261	0.054	2.1374e-29	7	Dtg
CG9932	1.49273e-20	0.337363	0.783	0.44	1.86441e-16	7	CG9932
side2	1.05025e-17	0.337217	0.931	0.677	1.31176e-13	7	side
Cam1	2.18793e-44	0.336627	1	0.996	2.73272e-40	7	Cam
CCT42	1.7648e-13	0.332923	0.7	0.487	2.20423e-09	7	CCT4
Tsp42El2	3.50258e-36	0.332738	0.271	0.056	4.37472e-32	7	Tsp42El
glec2	7.3383e-12	0.33052	0.7	0.485	9.16553e-08	7	glec
kek5	2.98473e-14	0.330292	0.512	0.287	3.72792e-10	7	kek5
CG329821	5.72949e-20	0.325822	0.724	0.406	7.15613e-16	7	CG32982
dpr152	2.00712e-13	0.321709	0.488	0.266	2.5069e-09	7	dpr15
Dlc90F	7.9153e-12	0.321327	0.739	0.546	9.88622e-08	7	Dlc90F
CAP1	1.34384e-10	0.320755	0.251	0.111	1.67846e-06	7	CAP
CG444221	2.09699e-16	0.320578	0.803	0.504	2.61914e-12	7	CG44422
Trx-2	1.88092e-19	0.317547	0.966	0.848	2.34927e-15	7	Trx-2
PIG-F1	2.25292e-12	0.31706	0.69	0.478	2.8139e-08	7	PIG-F
CG426632	7.67611e-13	0.315613	0.463	0.253	9.58746e-09	7	CG42663
alphaTub84B2	1.19573e-16	0.309793	0.975	0.975	1.49347e-12	7	alphaTub84B
hid	1.12757e-20	0.304614	0.256	0.077	1.40833e-16	7	hid
mub1	1.46708e-23	0.302298	0.97	0.893	1.83239e-19	7	mub
bib	1.28719e-26	0.299038	0.251	0.063	1.6077e-22	7	bib
CG427503	2.07056e-16	0.297739	0.852	0.585	2.58612e-12	7	CG42750
CG457811	6.34864e-25	0.297638	0.325	0.099	7.92945e-21	7	CG45781
tok3	8.69531e-17	0.297282	0.537	0.269	1.08604e-12	7	tok
CG12817	2.04897e-09	0.286677	0.522	0.351	2.55916e-05	7	CG12817
Pka-C12	7.39891e-30	0.285867	0.975	0.873	9.24124e-26	7	Pka-C1
CG30089	2.50877e-10	0.284604	0.443	0.256	3.13346e-06	7	CG30089
AdipoR1	1.50989e-10	0.283755	0.695	0.505	1.88586e-06	7	AdipoR
CG42795	8.3758e-08	0.283423	0.453	0.303	0.00104614	7	CG42795
Rala	2.95763e-08	0.282538	0.606	0.454	0.000369407	7	Rala
Gfrl	1.97353e-17	0.280388	0.936	0.663	2.46494e-13	7	Gfrl
Drak	5.74043e-08	0.276898	0.537	0.365	0.000716979	7	Drak
l(3)neo382	4.16055e-10	0.276504	0.591	0.389	5.19652e-06	7	l(3)neo38
Nop17l	6.04432e-11	0.270275	0.355	0.189	7.54936e-07	7	Nop17l
RpL361	6.77292e-20	0.268848	0.97	0.941	8.45937e-16	7	RpL36
Sec61beta1	1.63947e-13	0.267582	0.926	0.808	2.0477e-09	7	Sec61beta
futsch1	5.60746e-17	0.266619	0.985	0.93	7.00372e-13	7	futsch
RpL262	3.84051e-23	0.264549	0.985	0.959	4.79679e-19	7	RpL26
CanB2	2.71654e-14	0.262631	0.98	0.883	3.39296e-10	7	CanB2
ko2	1.43284e-20	0.26236	0.271	0.085	1.78962e-16	7	ko
RASSF82	8.37704e-09	0.261831	0.768	0.605	0.000104629	7	RASSF8
qvr2	4.07145e-11	0.258426	0.956	0.85	5.08524e-07	7	qvr
CG425412	7.1028e-17	0.25838	0.951	0.792	8.8714e-13	7	CG42541
Tusp	3.06425e-08	0.255827	0.345	0.206	0.000382725	7	Tusp
Actbeta1	2.18056e-08	0.255215	0.606	0.429	0.000272352	7	Actbeta
Src64B1	1.80339e-07	0.253729	0.581	0.449	0.00225243	7	Src64B
CG4404	2.25527e-12	0.252049	0.305	0.14	2.81683e-08	7	CG4404
RpS3A1	5.09227e-21	0.251881	0.985	0.953	6.36025e-17	7	RpS3A
Lk6	7.78377e-09	0.251469	0.906	0.777	9.72193e-05	7	Lk6
CG12605	5.05645e-09	0.25104	0.837	0.707	6.3155e-05	7	CG12605
CG121631	6.62153e-102	1.64859	0.861	0.367	8.2703e-98	8	CG12163
CG96501	7.51456e-137	1.57451	0.926	0.252	9.38569e-133	8	CG9650
SoxN3	1.31894e-157	1.56537	0.847	0.168	1.64735e-153	8	SoxN
erm	0	1.37751	0.559	0.012	0	8	erm
TkR86C	1.42803e-135	1.32319	0.629	0.105	1.78361e-131	8	TkR86C
nuf	1.07522e-69	1.20742	0.678	0.253	1.34295e-65	8	nuf
CG425413	1.73442e-79	1.18624	0.995	0.791	2.16629e-75	8	CG42541
CG145092	3.20123e-83	1.17641	0.985	0.814	3.99833e-79	8	CG14509
dpr101	7.94829e-59	1.15647	0.678	0.275	9.92741e-55	8	dpr10
Sox102F1	2.29493e-109	1.14965	0.619	0.116	2.86637e-105	8	Sox102F
scro4	1.5164e-89	1.14299	0.762	0.214	1.89398e-85	8	scro
CG441531	1.4484e-64	1.09059	0.876	0.495	1.80906e-60	8	CG44153
Hr45	1.54341e-74	1.08923	0.99	0.892	1.92771e-70	8	Hr4
CG12594	4.02563e-68	1.06566	0.896	0.457	5.02801e-64	8	CG12594
beat-Ia	3.2189e-70	0.976562	0.871	0.388	4.02041e-66	8	beat-Ia
CG436583	3.15246e-57	0.970627	0.936	0.56	3.93743e-53	8	CG43658
Syn12	1.19204e-69	0.948199	0.95	0.797	1.48885e-65	8	Syn1
CG2082	8.95938e-38	0.911877	0.683	0.391	1.11903e-33	8	CG2082
eys1	1.43487e-47	0.889464	0.871	0.558	1.79215e-43	8	eys
mbc	1.35308e-41	0.867491	0.361	0.095	1.69e-37	8	mbc
roX23	3.7005e-46	0.853752	0.906	0.846	4.62192e-42	8	roX2
REPTOR	8.55076e-20	0.848592	0.391	0.192	1.06799e-15	8	REPTOR
toy3	9.19036e-49	0.845486	0.861	0.43	1.14788e-44	8	toy
beat-IIIc	9.02275e-50	0.834853	0.772	0.369	1.12694e-45	8	beat-IIIc
Snoo3	3.96702e-32	0.821885	0.723	0.489	4.9548e-28	8	Snoo
bru12	2.00594e-22	0.821674	0.495	0.269	2.50542e-18	8	bru1
CG423391	2.63252e-34	0.819191	0.653	0.355	3.28801e-30	8	CG42339
oaf	2.34654e-29	0.815864	0.55	0.284	2.93083e-25	8	oaf
SKIP	1.00102e-36	0.803226	0.782	0.51	1.25027e-32	8	SKIP
CG423133	7.52301e-44	0.790642	0.936	0.725	9.39624e-40	8	CG42313
dpr52	4.52931e-25	0.787846	0.594	0.349	5.65711e-21	8	dpr5
CG329822	6.80699e-33	0.786983	0.683	0.407	8.50193e-29	8	CG32982
CG135791	3.54118e-32	0.78607	0.411	0.147	4.42293e-28	8	CG13579
CG178391	2.26347e-29	0.779109	0.584	0.313	2.82707e-25	8	CG17839
Drl-2	1.10652e-15	0.735687	0.455	0.28	1.38204e-11	8	Drl-2
kek2	8.89348e-35	0.732376	0.901	0.709	1.1108e-30	8	kek2
CG182651	3.37987e-27	0.723308	0.436	0.184	4.22146e-23	8	CG18265
Octbeta3R	8.70019e-22	0.715101	0.629	0.428	1.08665e-17	8	Octbeta3R
CG427471	1.2067e-24	0.701443	0.396	0.163	1.50717e-20	8	CG42747
CG42238	1.95649e-13	0.697615	0.46	0.307	2.44366e-09	8	CG42238
Ccn	1.06361e-17	0.693149	0.53	0.328	1.32844e-13	8	Ccn
CG13739	2.71748e-13	0.692169	0.46	0.284	3.39413e-09	8	CG13739
CG135941	3.83873e-18	0.684651	0.5	0.303	4.79457e-14	8	CG13594
CG43740	2.10812e-20	0.682045	0.411	0.198	2.63304e-16	8	CG43740
CG99321	1.27304e-22	0.681077	0.673	0.443	1.59003e-18	8	CG9932
CG343711	2.61732e-17	0.673846	0.55	0.359	3.26904e-13	8	CG34371
tok4	2.12198e-23	0.669618	0.515	0.27	2.65035e-19	8	tok
CG30158	3.79717e-22	0.668185	0.391	0.17	4.74267e-18	8	CG30158
SK	1.09365e-27	0.665851	0.871	0.724	1.36596e-23	8	SK
beat-Ib2	3.28617e-25	0.6596	0.743	0.536	4.10443e-21	8	beat-Ib
Syp3	2.51069e-47	0.654069	0.995	0.915	3.13585e-43	8	Syp
Gfrl1	1.65516e-35	0.654059	0.891	0.664	2.06729e-31	8	Gfrl
Oatp74D1	3.28683e-23	0.644778	0.733	0.61	4.10525e-19	8	Oatp74D
kek63	1.77268e-17	0.64467	0.53	0.358	2.21408e-13	8	kek6
toc	4.19545e-08	0.641361	0.455	0.381	0.000524012	8	toc
Ten-a1	4.3629e-37	0.618314	0.99	0.95	5.44926e-33	8	Ten-a
Fas21	4.61639e-16	0.613088	0.678	0.482	5.76588e-12	8	Fas2
Eip74EF	4.69585e-13	0.611468	0.322	0.167	5.86512e-09	8	Eip74EF
CG36551	2.02917e-19	0.607214	0.564	0.353	2.53443e-15	8	CG3655
CG5890	8.84732e-15	0.605628	0.668	0.573	1.10503e-10	8	CG5890
CG11873	3.14013e-18	0.605247	0.668	0.55	3.92202e-14	8	CG11873
klg3	2.42313e-48	0.60285	0.995	0.76	3.02649e-44	8	klg
CR45621	2.36536e-84	0.599963	0.252	0.022	2.95434e-80	8	CR45621
beat-Ic2	5.70079e-18	0.5979	0.683	0.482	7.12028e-14	8	beat-Ic
dpr81	1.98698e-26	0.596052	0.866	0.708	2.48174e-22	8	dpr8
CG12991	1.37827e-09	0.595216	0.535	0.476	1.72146e-05	8	CG12991
MRE162	1.18743e-43	0.594809	0.995	0.953	1.4831e-39	8	MRE16
CenG1A2	7.68555e-13	0.581616	0.371	0.213	9.59925e-09	8	CenG1A
pigs1	2.00538e-13	0.573041	0.545	0.396	2.50472e-09	8	pigs
mamo3	4.19885e-26	0.568492	0.842	0.504	5.24437e-22	8	mamo
rad	3.31323e-36	0.564565	0.842	0.594	4.13822e-32	8	rad
CG343471	2.2583e-13	0.560067	0.366	0.201	2.82061e-09	8	CG34347
corto	4.25963e-19	0.555143	0.728	0.615	5.32028e-15	8	corto
SPoCk1	3.07428e-10	0.537138	0.554	0.488	3.83978e-06	8	SPoCk
CG42402	2.26584e-19	0.536232	0.807	0.676	2.83003e-15	8	CG42402
Pde1c	1.52073e-08	0.535567	0.485	0.376	0.000189939	8	Pde1c
CG5151	3.10178e-12	0.53456	0.604	0.52	3.87413e-08	8	CG5151
CG425401	1.05015e-37	0.531474	1	0.903	1.31163e-33	8	CG42540
Sf3b62	8.91762e-13	0.529464	0.663	0.624	1.11381e-08	8	Sf3b6
Ptp10D	9.72327e-14	0.523871	0.678	0.599	1.21444e-09	8	Ptp10D
Drak1	1.61222e-09	0.516057	0.47	0.367	2.01367e-05	8	Drak
KrT95D1	2.1058e-22	0.512	0.822	0.722	2.63014e-18	8	KrT95D
rho1	2.99962e-08	0.510408	0.322	0.203	0.000374653	8	rho
l(3)neo383	4.93594e-12	0.508845	0.53	0.391	6.16499e-08	8	l(3)neo38
gpp2	8.54857e-16	0.507334	0.733	0.632	1.06772e-11	8	gpp
Nrg1	2.72518e-24	0.502821	0.886	0.794	3.40375e-20	8	Nrg
dally	6.85283e-13	0.501478	0.49	0.331	8.55919e-09	8	dally
Ptp99A3	1.17999e-33	0.493942	0.99	0.857	1.47381e-29	8	Ptp99A
HmgZ	7.49806e-23	0.493613	0.975	0.919	9.36508e-19	8	HmgZ
DIP-gamma1	3.65537e-08	0.493026	0.446	0.336	0.000456556	8	DIP-gamma
mub2	8.86649e-32	0.489122	0.975	0.893	1.10742e-27	8	mub
cg	3.67721e-12	0.485967	0.678	0.64	4.59283e-08	8	cg
CG331812	1.08041e-06	0.484464	0.421	0.342	0.0134943	8	CG33181
wit1	1.62747e-11	0.483249	0.307	0.161	2.03271e-07	8	wit
olf4131	4.19697e-17	0.482235	0.738	0.576	5.24202e-13	8	olf413
Dscam3	5.91555e-13	0.481974	0.5	0.318	7.38852e-09	8	Dscam3
Tsp66E5	5.38121e-20	0.474238	0.941	0.83	6.72113e-16	8	Tsp66E
Ace	1.91172e-15	0.473097	0.847	0.762	2.38774e-11	8	Ace
HnRNP-K	2.06674e-14	0.467027	0.688	0.614	2.58136e-10	8	HnRNP-K
Eip63F-1	1.96263e-10	0.465077	0.297	0.157	2.45132e-06	8	Eip63F-1
Actbeta2	2.33959e-07	0.458923	0.485	0.432	0.00292215	8	Actbeta
jim	1.31389e-55	0.451244	1	0.971	1.64105e-51	8	jim
Octbeta2R1	7.34129e-10	0.44972	0.594	0.476	9.16927e-06	8	Octbeta2R
CG16791	9.03879e-17	0.448541	0.787	0.685	1.12894e-12	8	CG16791
siz	2.66865e-06	0.44834	0.475	0.437	0.0333315	8	siz
fs(1)h	6.83558e-23	0.446141	0.941	0.859	8.53764e-19	8	fs(1)h
Hr3	9.71084e-09	0.44591	0.649	0.624	0.000121288	8	Hr3
RapGAP11	2.76446e-13	0.444427	0.802	0.772	3.45282e-09	8	RapGAP1
nrm1	2.39957e-16	0.443764	0.787	0.684	2.99706e-12	8	nrm
CG423891	6.31048e-13	0.4433	0.752	0.671	7.88179e-09	8	CG42389
His3.3B1	7.62665e-42	0.438181	0.98	0.947	9.52568e-38	8	His3.3B
Nlg3	3.88609e-23	0.438147	0.955	0.858	4.85372e-19	8	Nlg3
CG103841	5.52566e-13	0.43189	0.579	0.419	6.90155e-09	8	CG10384
cpo3	1.81182e-25	0.43136	0.97	0.901	2.26296e-21	8	cpo
HmgD2	7.48996e-10	0.428772	0.738	0.714	9.35496e-06	8	HmgD
puc2	9.60998e-06	0.428659	0.455	0.379	0.120029	8	puc
M62	0.00218486	0.423297	0.337	0.308	1	8	M6
Dsp1	7.76947e-18	0.421007	0.856	0.788	9.70406e-14	8	Dsp1
sty	7.05302e-05	0.418152	0.525	0.477	0.880922	8	sty
dpr91	3.48884e-07	0.417206	0.653	0.593	0.00435756	8	dpr9
phyl	5.30013e-05	0.41667	0.455	0.418	0.661987	8	phyl
fra1	2.94615e-05	0.414101	0.426	0.379	0.367974	8	fra
Rbfox12	1.36733e-27	0.413822	1	0.953	1.70779e-23	8	Rbfox1
Oli1	1.1591e-05	0.412273	0.495	0.477	0.144771	8	Oli
Smr	3.50039e-11	0.41166	0.733	0.713	4.37198e-07	8	Smr
Wdr62	3.89168e-07	0.409184	0.624	0.622	0.0048607	8	Wdr62
cnn1	0.0026979	0.408821	0.381	0.379	1	8	cnn
robo31	1.32459e-06	0.407669	0.361	0.261	0.0165441	8	robo3
trx	8.4545e-12	0.406444	0.718	0.701	1.05597e-07	8	trx
DOR1	8.31594e-06	0.405766	0.634	0.67	0.103866	8	DOR
msi	4.58748e-17	0.404057	0.896	0.822	5.72977e-13	8	msi
CR457581	2.34374e-13	0.400733	0.752	0.671	2.92733e-09	8	CR45758
CG1943	5.72171e-16	0.395373	0.891	0.865	7.14642e-12	8	CG1943
AGO1	6.29837e-12	0.395182	0.842	0.828	7.86666e-08	8	AGO1
crol	6.26376e-07	0.391425	0.604	0.609	0.00782344	8	crol
cdc14	1.88283e-07	0.390238	0.639	0.656	0.00235166	8	cdc14
Mad	0.000115834	0.384939	0.317	0.25	1	8	Mad
eEF5	1.35792e-35	0.38174	0.995	0.96	1.69604e-31	8	eEF5
CR46064	0.00989	0.378433	0.351	0.351	1	8	CR46064
wge	0.0011353	0.37446	0.292	0.244	1	8	wge
B521	6.43264e-15	0.373375	0.827	0.785	8.03437e-11	8	B52
Fur1	5.57641e-08	0.368737	0.515	0.411	0.000696494	8	Fur1
Prosap2	5.47383e-18	0.365374	0.955	0.922	6.83681e-14	8	Prosap
CG343701	0.000201768	0.362879	0.332	0.269	1	8	CG34370
CG42684	1.01798e-06	0.358702	0.554	0.54	0.0127146	8	CG42684
Klp98A	0.00674932	0.357159	0.356	0.348	1	8	Klp98A
wry2	8.9929e-11	0.356015	0.713	0.601	1.12321e-06	8	wry
Teh11	9.29653e-06	0.350241	0.579	0.562	0.116114	8	Teh1
yrt	0.00219477	0.349899	0.332	0.3	1	8	yrt
CG33298	0.000445849	0.348443	0.366	0.327	1	8	CG33298
gogo	0.00370329	0.345509	0.277	0.228	1	8	gogo
nmo	2.47416e-14	0.344758	0.926	0.884	3.09023e-10	8	nmo
Dscam1	1.12441e-10	0.343039	0.762	0.731	1.40439e-06	8	Dscam1
snRNA:7SK2	1.34797e-06	0.341312	0.594	0.567	0.0168362	8	snRNA:7SK
Jupiter1	5.85352e-26	0.336039	0.965	0.935	7.31104e-22	8	Jupiter
RpL311	8.38945e-21	0.334722	0.985	0.942	1.04784e-16	8	RpL31
CG13917	1.0422e-11	0.333452	0.847	0.837	1.3017e-07	8	CG13917
Smox	0.00070635	0.33289	0.356	0.312	1	8	Smox
CG113601	2.53957e-13	0.332169	0.871	0.85	3.17192e-09	8	CG11360
JIL-1	1.07272e-05	0.330798	0.535	0.522	0.133983	8	JIL-1
CG6700	0.000161538	0.330708	0.55	0.577	1	8	CG6700
drl2	0.00095185	0.330317	0.376	0.327	1	8	drl
cic	6.97138e-05	0.329801	0.658	0.711	0.870726	8	cic
shep1	2.3232e-30	0.32917	1	0.988	2.90168e-26	8	shep
Tina-1	1.10508e-08	0.328825	0.797	0.766	0.000138024	8	Tina-1
beat-VI1	9.69047e-07	0.328241	0.584	0.482	0.0121034	8	beat-VI
spen	1.96916e-14	0.32258	0.965	0.937	2.45948e-10	8	spen
Evi5	3.64562e-09	0.320564	0.738	0.755	4.55338e-05	8	Evi5
Hrb98DE	0.0014216	0.318758	0.599	0.688	1	8	Hrb98DE
lolal	1.43479e-06	0.317948	0.683	0.705	0.0179205	8	lolal
LRP1	0.0055511	0.316497	0.396	0.381	1	8	LRP1
CG42394	0.0011419	0.312687	0.406	0.379	1	8	CG42394
RpL12	8.23296e-29	0.31099	0.995	0.974	1.0283e-24	8	RpL12
CG152361	2.73603e-05	0.308256	0.515	0.46	0.34173	8	CG15236
RpL263	1.05816e-23	0.308024	0.98	0.959	1.32164e-19	8	RpL26
Fili2	0.000444961	0.307025	0.332	0.267	1	8	Fili
CG5830	0.00326085	0.303538	0.287	0.24	1	8	CG5830
CG34401	0.000266079	0.303416	0.658	0.727	1	8	CG34401
otk	3.32949e-05	0.30303	0.465	0.409	0.415853	8	otk
CG148181	1.08488e-05	0.301107	0.718	0.71	0.135501	8	CG14818
lola1	8.9305e-10	0.300675	0.871	0.853	1.11542e-05	8	lola
FoxP	0.00281989	0.299359	0.545	0.586	1	8	FoxP
CG325212	2.49202e-05	0.293614	0.416	0.331	0.311253	8	CG32521
Rbp62	2.70204e-21	0.290909	0.975	0.844	3.37484e-17	8	Rbp6
kek1	6.83799e-11	0.288926	0.856	0.748	8.54066e-07	8	kek1
Tsp39D2	1.48544e-12	0.287753	0.896	0.837	1.85532e-08	8	Tsp39D
CG327721	0.00261802	0.285554	0.455	0.475	1	8	CG32772
ttv	8.69008e-06	0.283371	0.649	0.655	0.108539	8	ttv
Alk	2.84654e-07	0.277336	0.762	0.77	0.00355532	8	Alk
pan2	2.88545e-11	0.276655	0.911	0.901	3.60393e-07	8	pan
RpS6	5.55801e-13	0.276206	0.965	0.929	6.94196e-09	8	RpS6
chn	1.32775e-05	0.27405	0.728	0.756	0.165836	8	chn
ap2	1.14613e-08	0.270461	0.431	0.257	0.000143152	8	ap
Cngl	4.49102e-14	0.266715	0.886	0.765	5.60928e-10	8	Cngl
dnc1	1.78231e-08	0.266492	0.901	0.876	0.000222611	8	dnc
Dscam23	4.09803e-15	0.266324	0.995	0.94	5.11844e-11	8	Dscam2
tai1	4.35431e-06	0.264569	0.668	0.66	0.0543853	8	tai
rudhira1	0.00262059	0.261124	0.594	0.648	1	8	rudhira
shrb	0.00690968	0.260193	0.5	0.559	1	8	shrb
Glut4EF2	9.96591e-07	0.260123	0.743	0.717	0.0124474	8	Glut4EF
Gprk1	4.79351e-06	0.258446	0.787	0.81	0.0598709	8	Gprk1
RpS3A2	4.19132e-18	0.258142	0.99	0.952	5.23496e-14	8	RpS3A
RpL362	2.03539e-14	0.257109	0.995	0.94	2.5422e-10	8	RpL36
RpL41	2.34209e-14	0.25525	0.985	0.948	2.92527e-10	8	RpL41
noe	1.26751e-23	0.254064	1	1	1.58312e-19	8	noe
CG332291	0.00129221	0.252935	0.515	0.519	1	8	CG33229
EcR	0.00967209	0.252409	0.475	0.505	1	8	EcR
RpS231	1.55294e-18	0.251878	0.995	0.956	1.93963e-14	8	RpS23
Gug2	0.000466993	0.250962	0.639	0.711	1	8	Gug
Hr38	3.28793e-126	2.50769	0.99	0.5	4.10663e-122	9	Hr38
Bx2	1.37043e-135	1.73667	0.995	0.371	1.71166e-131	9	Bx
Mkp31	1.83195e-81	1.50775	0.949	0.514	2.28811e-77	9	Mkp3
CG14186	3.05558e-111	1.48663	0.985	0.469	3.81642e-107	9	CG14186
bi2	2.19159e-132	1.3137	0.985	0.274	2.73729e-128	9	bi
CG312212	1.0118e-85	1.18615	1	0.606	1.26374e-81	9	CG31221
ct1	2.45505e-122	1.17694	0.944	0.247	3.06636e-118	9	ct
Ca-alpha1T1	2.39027e-85	1.15408	0.99	0.515	2.98545e-81	9	Ca-alpha1T
GABA-B-R31	4.37005e-81	1.0867	0.694	0.199	5.45819e-77	9	GABA-B-R3
puc3	6.73477e-86	1.08108	0.913	0.367	8.41173e-82	9	puc
ap3	9.63453e-104	1.03531	0.898	0.245	1.20335e-99	9	ap
DIP-beta1	8.15651e-105	1.02924	0.837	0.219	1.01875e-100	9	DIP-beta
kune1	1.89792e-88	0.977548	0.862	0.31	2.3705e-84	9	kune
nrm2	1.25216e-64	0.937879	0.985	0.679	1.56394e-60	9	nrm
rdgA4	1.95717e-71	0.934404	0.995	0.669	2.4445e-67	9	rdgA
CR460061	3.90164e-82	0.927122	0.714	0.189	4.87315e-78	9	CR46006
sty1	1.76742e-42	0.905763	0.842	0.469	2.20751e-38	9	sty
CG37262	2.12507e-62	0.827017	0.878	0.382	2.65421e-58	9	CG3726
CG425942	9.75389e-56	0.808288	0.872	0.453	1.21826e-51	9	CG42594
mamo4	1.89504e-48	0.807519	0.949	0.501	2.36691e-44	9	mamo
toy4	5.46292e-53	0.76973	0.949	0.428	6.82318e-49	9	toy
CG4577	9.05356e-52	0.766796	0.735	0.301	1.13079e-47	9	CG4577
bru13	2.07443e-57	0.750391	0.73	0.264	2.59096e-53	9	bru1
kay	3.95016e-38	0.744527	0.561	0.227	4.93375e-34	9	kay
VhaAC451	7.66339e-39	0.725312	0.765	0.439	9.57157e-35	9	VhaAC45
CG14024	1.02585e-45	0.724565	0.806	0.417	1.28129e-41	9	CG14024
eag2	4.09217e-40	0.72407	0.796	0.432	5.11112e-36	9	eag
CG313241	5.56209e-41	0.719501	0.679	0.287	6.94705e-37	9	CG31324
Rgk32	1.12402e-41	0.716915	0.745	0.353	1.40391e-37	9	Rgk3
Eip93F3	2.12496e-43	0.694986	0.974	0.481	2.65408e-39	9	Eip93F
Hex-A	6.25458e-38	0.694489	0.821	0.493	7.81196e-34	9	Hex-A
w2	9.25357e-42	0.679468	0.776	0.366	1.15577e-37	9	w
Frq24	1.30934e-42	0.672394	0.939	0.636	1.63536e-38	9	Frq2
CG69591	5.02729e-34	0.670383	0.75	0.398	6.27908e-30	9	CG6959
hig1	1.17826e-21	0.663539	0.592	0.329	1.47165e-17	9	hig
Trim94	5.99144e-44	0.649749	0.893	0.485	7.48331e-40	9	Trim9
Sik3	8.62035e-39	0.644275	0.571	0.231	1.07668e-34	9	Sik3
kek11	1.95359e-44	0.64351	0.98	0.745	2.44004e-40	9	kek1
CG437591	4.77244e-38	0.642655	0.77	0.388	5.96078e-34	9	CG43759
CG171242	4.31146e-53	0.636783	1	0.825	5.38501e-49	9	CG17124
GFP3	1.13859e-46	0.63554	0.969	0.742	1.4221e-42	9	GFP
luna1	1.27045e-40	0.630066	0.959	0.67	1.58679e-36	9	luna
CG316764	7.26657e-48	0.627643	0.735	0.256	9.07594e-44	9	CG31676
CR457582	7.73884e-37	0.626658	0.934	0.667	9.66581e-33	9	CR45758
CR434921	2.39231e-132	0.623	0.367	0.03	2.988e-128	9	CR43492
scrt2	1.41053e-46	0.601673	1	0.886	1.76175e-42	9	scrt
ham3	5.30931e-58	0.600398	0.714	0.207	6.63133e-54	9	ham
jeb	1.54044e-39	0.591453	0.969	0.692	1.92401e-35	9	jeb
Drep3	1.03698e-41	0.591428	0.51	0.169	1.29518e-37	9	Drep3
beat-IIIb3	5.78086e-39	0.586955	0.893	0.503	7.22029e-35	9	beat-IIIb
Tet1	1.05503e-43	0.57056	0.995	0.865	1.31773e-39	9	Tet
sky3	7.44911e-32	0.565718	0.852	0.565	9.30394e-28	9	sky
GluClalpha2	1.79245e-42	0.562776	0.995	0.868	2.23876e-38	9	GluClalpha
CG112212	3.69645e-22	0.550539	0.393	0.158	4.61687e-18	9	CG11221
Snoo4	2.24191e-29	0.54771	0.806	0.488	2.80015e-25	9	Snoo
Gk2	1.3731e-39	0.547598	0.485	0.16	1.715e-35	9	Gk2
phyl1	4.81751e-28	0.540842	0.719	0.412	6.01707e-24	9	phyl
Sema1a4	1.90275e-51	0.539988	1	0.942	2.37653e-47	9	Sema1a
bma1	3.2875e-35	0.53996	0.612	0.244	4.10609e-31	9	bma
CG103842	1.54358e-25	0.531302	0.709	0.415	1.92794e-21	9	CG10384
NK7.1	1.08375e-27	0.5306	0.76	0.412	1.3536e-23	9	NK7.1
CG436584	1.85162e-42	0.528792	0.974	0.56	2.31267e-38	9	CG43658
mspo1	9.26991e-33	0.523625	0.903	0.599	1.15781e-28	9	mspo
beat-VI2	1.98663e-35	0.515367	0.908	0.474	2.4813e-31	9	beat-VI
plx2	3.88806e-23	0.508893	0.673	0.421	4.85619e-19	9	plx
CG437372	2.60971e-39	0.506296	0.985	0.749	3.25953e-35	9	CG43737
Sirt1	1.27888e-24	0.504316	0.77	0.498	1.59731e-20	9	Sirt1
FMRFaR3	3.47979e-17	0.501496	0.495	0.258	4.34626e-13	9	FMRFaR
CG144594	3.98974e-48	0.500409	0.679	0.209	4.98318e-44	9	CG14459
CG124842	7.63387e-33	0.497373	0.622	0.275	9.53471e-29	9	CG12484
beat-Vc2	6.15697e-26	0.493361	0.556	0.257	7.69006e-22	9	beat-Vc
CG89102	7.39502e-25	0.491391	0.577	0.283	9.23638e-21	9	CG8910
Fas33	1.69065e-33	0.49019	0.862	0.434	2.11162e-29	9	Fas3
TyrR1	1.03093e-20	0.488316	0.434	0.191	1.28763e-16	9	TyrR
caps2	8.99071e-26	0.486044	0.827	0.536	1.12294e-21	9	caps
nmo1	1.19137e-35	0.481214	1	0.882	1.48802e-31	9	nmo
CG427504	4.85675e-32	0.479787	0.929	0.583	6.06608e-28	9	CG42750
CG177783	4.88652e-20	0.478532	0.74	0.503	6.10326e-16	9	CG17778
CCKLR-17D3	3.40442e-21	0.476835	0.571	0.295	4.25212e-17	9	CCKLR-17D3
Atf3	1.52177e-22	0.476141	0.352	0.13	1.90069e-18	9	Atf3
lbk4	7.34718e-22	0.474859	0.77	0.521	9.17662e-18	9	lbk
Lar3	3.88733e-35	0.474191	0.985	0.887	4.85527e-31	9	Lar
Dyrk2	1.50839e-18	0.472198	0.765	0.531	1.88399e-14	9	Dyrk2
CG36552	2.91741e-21	0.462631	0.633	0.352	3.64384e-17	9	CG3655
SK1	4.28045e-24	0.462564	0.944	0.722	5.34629e-20	9	SK
Syp4	9.06138e-36	0.458917	1	0.915	1.13177e-31	9	Syp
CG423134	1.6572e-27	0.457176	0.98	0.724	2.06985e-23	9	CG42313
wry3	1.75876e-30	0.454989	0.918	0.596	2.19669e-26	9	wry
CG341142	5.49116e-25	0.453158	0.888	0.621	6.85846e-21	9	CG34114
CG3638	2.18635e-24	0.450808	0.867	0.651	2.73075e-20	9	CG3638
Efa61	2.22234e-22	0.450717	0.638	0.371	2.7757e-18	9	Efa6
AstC-R12	4.87193e-22	0.450257	0.469	0.205	6.08505e-18	9	AstC-R1
CG129911	1.71498e-21	0.448039	0.719	0.471	2.14201e-17	9	CG12991
Psc	1.76021e-23	0.447273	0.73	0.434	2.1985e-19	9	Psc
CR31451	1.93087e-31	0.434545	1	0.877	2.41166e-27	9	CR31451
Oct-TyrR1	2.17742e-28	0.43353	0.827	0.447	2.71959e-24	9	Oct-TyrR
Su(z)2	9.86007e-16	0.43347	0.515	0.297	1.23152e-11	9	Su(z)2
Spn42Da	2.85253e-22	0.432698	0.362	0.139	3.5628e-18	9	Spn42Da
RapGAP12	1.79998e-26	0.421095	0.954	0.768	2.24818e-22	9	RapGAP1
beat-Va2	1.30244e-13	0.418005	0.556	0.349	1.62675e-09	9	beat-Va
Argk2	3.96908e-25	0.417245	0.985	0.886	4.95738e-21	9	Argk
inaE1	2.35152e-17	0.411875	0.724	0.496	2.93704e-13	9	inaE
Mmp21	8.95687e-16	0.410635	0.51	0.287	1.11871e-11	9	Mmp2
Ptp99A4	5.16357e-30	0.41003	0.995	0.857	6.4493e-26	9	Ptp99A
Toll-63	1.24439e-20	0.409505	0.903	0.636	1.55424e-16	9	Toll-6
Teh12	1.04731e-19	0.409263	0.791	0.556	1.3081e-15	9	Teh1
nAChRalpha1	1.58805e-20	0.407629	0.964	0.784	1.98347e-16	9	nAChRalpha1
CG130552	4.65497e-21	0.407184	0.806	0.543	5.81406e-17	9	CG13055
dysc	1.07865e-35	0.40669	1	0.918	1.34723e-31	9	dysc
St33	8.07203e-16	0.405568	0.622	0.386	1.0082e-11	9	St3
plum	1.1814e-20	0.404955	0.704	0.43	1.47556e-16	9	plum
Drep1	2.23392e-14	0.403993	0.5	0.308	2.79016e-10	9	Drep1
CG84982	1.36614e-24	0.403585	0.954	0.775	1.70631e-20	9	CG8498
CG135792	1.1122e-20	0.399553	0.378	0.148	1.38914e-16	9	CG13579
mGluR2	4.47018e-16	0.39555	0.556	0.31	5.58325e-12	9	mGluR
Pdk1	4.1176e-09	0.394753	0.464	0.327	5.14288e-05	9	Pdk1
CG423461	9.93448e-17	0.392547	0.515	0.277	1.24082e-12	9	CG42346
roX24	1.09162e-23	0.389633	1	0.843	1.36344e-19	9	roX2
dpr12	2.64367e-21	0.389632	0.908	0.653	3.30195e-17	9	dpr12
Nna12	3.02123e-28	0.385754	0.327	0.091	3.77351e-24	9	Nna1
RpS21	1.02532e-38	0.378832	1	0.917	1.28063e-34	9	RpS21
orb2	6.62974e-19	0.368564	0.985	0.823	8.28055e-15	9	orb2
l(3)L1231	1.41455e-13	0.367804	0.689	0.541	1.76677e-09	9	l(3)L1231
CG331431	3.23608e-12	0.36658	0.75	0.573	4.04187e-08	9	CG33143
CG96502	5.19567e-33	0.365593	0.689	0.258	6.48939e-29	9	CG9650
RhoGDI	2.53348e-16	0.362886	0.806	0.654	3.16432e-12	9	RhoGDI
kek51	2.7063e-13	0.361893	0.485	0.288	3.38017e-09	9	kek5
Gprk2	5.52473e-17	0.360523	0.837	0.657	6.90039e-13	9	Gprk2
uzip	3.83778e-11	0.357321	0.357	0.195	4.79339e-07	9	uzip
CG343833	1.07299e-20	0.357079	0.929	0.69	1.34017e-16	9	CG34383
CG22011	2.94085e-17	0.354001	0.531	0.275	3.67312e-13	9	CG2201
dpr92	1.86883e-19	0.352734	0.867	0.588	2.33417e-15	9	dpr9
crim1	5.16344e-17	0.349547	0.418	0.199	6.44914e-13	9	crim
tara	1.95149e-11	0.349247	0.49	0.314	2.4374e-07	9	tara
CG140823	1.76898e-17	0.346338	0.469	0.224	2.20946e-13	9	CG14082
fra2	3.33669e-13	0.345584	0.571	0.375	4.16753e-09	9	fra
roX1	2.23568e-39	0.342994	1	0.914	2.79237e-35	9	roX1
AstA-R12	9.23986e-15	0.342638	0.357	0.156	1.15406e-10	9	AstA-R1
RpL39	6.74406e-27	0.340121	0.995	0.931	8.42334e-23	9	RpL39
CG402281	1.60441e-16	0.339906	0.954	0.796	2.00391e-12	9	CG40228
dpr153	9.06747e-13	0.338575	0.469	0.267	1.13253e-08	9	dpr15
Drak2	7.18576e-10	0.337296	0.52	0.366	8.97502e-06	9	Drak
Hr46	4.12796e-20	0.336638	0.969	0.892	5.15582e-16	9	Hr4
spen1	2.25808e-25	0.336238	1	0.936	2.82034e-21	9	spen
CG111913	3.21386e-14	0.336021	0.526	0.31	4.01412e-10	9	CG11191
dnc2	2.13778e-21	0.334707	1	0.873	2.67009e-17	9	dnc
CG427472	2.17664e-18	0.334445	0.388	0.163	2.71862e-14	9	CG42747
CG2865	6.52457e-10	0.331778	0.561	0.395	8.14919e-06	9	CG2865
CG133641	3.02875e-13	0.330453	0.964	0.805	3.78291e-09	9	CG13364
viaf	1.7588e-12	0.330214	0.74	0.583	2.19673e-08	9	viaf
Dgk1	1.40206e-09	0.327795	0.367	0.213	1.75117e-05	9	Dgk
CG39671	2.00074e-13	0.323904	0.77	0.593	2.49893e-09	9	CG3967
RpS20	1.06762e-27	0.320742	1	0.925	1.33346e-23	9	RpS20
RASSF83	1.02804e-13	0.318919	0.776	0.605	1.28402e-09	9	RASSF8
CG329823	2.01987e-18	0.3183	0.684	0.407	2.52281e-14	9	CG32982
dpr102	2.53399e-15	0.317368	0.515	0.28	3.16496e-11	9	dpr10
BuGZ1	8.42529e-12	0.316487	0.689	0.515	1.05232e-07	9	BuGZ
corto1	1.05862e-12	0.315908	0.796	0.613	1.32222e-08	9	corto
RpL363	2.70904e-30	0.313448	1	0.94	3.3836e-26	9	RpL36
RpL411	1.25602e-28	0.31222	1	0.948	1.56877e-24	9	RpL41
CG60241	9.73593e-10	0.309116	0.786	0.691	1.21602e-05	9	CG6024
CG437781	2.38027e-08	0.308728	0.49	0.347	0.000297295	9	CG43778
drongo	9.5337e-09	0.306132	0.367	0.225	0.000119076	9	drongo
CG41011	4.91163e-16	0.305832	0.913	0.761	6.13463e-12	9	CG4101
RpL23A	2.95347e-24	0.304234	1	0.918	3.68888e-20	9	RpL23A
Bacc1	3.27532e-26	0.303911	1	0.974	4.09087e-22	9	Bacc
RpL37A	5.61201e-20	0.302956	0.995	0.9	7.0094e-16	9	RpL37A
Parp	8.16823e-13	0.298656	0.847	0.696	1.02021e-08	9	Parp
brat	9.45319e-16	0.297796	0.995	0.887	1.1807e-11	9	brat
CG16882	3.84133e-10	0.297075	0.434	0.25	4.79782e-06	9	CG1688
Pde11	0.00108605	0.295308	0.276	0.204	1	9	Pde11
Rdl1	1.24921e-30	0.294516	1	0.981	1.56026e-26	9	Rdl
RpL32	3.48457e-23	0.291755	1	0.923	4.35223e-19	9	RpL32
dpr62	7.03414e-15	0.291559	0.816	0.56	8.78565e-11	9	dpr6
wake	2.07413e-07	0.290871	0.281	0.16	0.00259058	9	wake
Trf2	1.23089e-12	0.290648	0.806	0.652	1.53738e-08	9	Trf2
Mid1	1.80386e-14	0.289912	0.867	0.685	2.25302e-10	9	Mid1
fax1	9.70428e-31	0.289335	1	0.978	1.21206e-26	9	fax
CG7029	1.39197e-10	0.287563	0.653	0.488	1.73857e-06	9	CG7029
l(3)neo384	1.7877e-10	0.286037	0.587	0.39	2.23284e-06	9	l(3)neo38
Rbp91	1.48158e-18	0.285927	1	0.915	1.85049e-14	9	Rbp9
spir	1.61828e-08	0.285257	0.495	0.35	0.000202123	9	spir
CG15312	7.41595e-10	0.284103	0.418	0.257	9.26253e-06	9	CG15312
CG147621	2.84822e-12	0.281485	0.699	0.473	3.55743e-08	9	CG14762
CG65831	5.41817e-10	0.281418	0.393	0.23	6.76729e-06	9	CG6583
CG331701	4.34194e-10	0.280465	0.745	0.595	5.42308e-06	9	CG33170
Neto	5.51762e-14	0.2787	0.332	0.15	6.89151e-10	9	Neto
CG32425	2.47997e-08	0.278257	0.638	0.505	0.000309748	9	CG32425
tai2	9.19228e-10	0.277114	0.796	0.657	1.14812e-05	9	tai
trn3	5.18716e-14	0.275824	0.719	0.48	6.47876e-10	9	trn
Nlg31	1.52955e-18	0.274898	1	0.857	1.91041e-14	9	Nlg3
Ziz	2.38466e-07	0.274479	0.342	0.216	0.00297844	9	Ziz
CG93281	2.16909e-09	0.273711	0.469	0.307	2.70919e-05	9	CG9328
whd	2.62695e-06	0.273682	0.337	0.22	0.0328107	9	whd
CG31042	2.18202e-06	0.273446	0.372	0.262	0.0272535	9	CG3104
ena	6.50336e-10	0.273264	0.791	0.689	8.1227e-06	9	ena
RpLP0	4.81195e-19	0.272966	1	0.911	6.01013e-15	9	RpLP0
CG45050	2.07987e-09	0.272818	0.781	0.654	2.59776e-05	9	CG45050
U4-U6-60K	8.83071e-11	0.272794	0.607	0.434	1.10296e-06	9	U4-U6-60K
jvl	8.34904e-08	0.272566	0.628	0.508	0.0010428	9	jvl
Ten-m4	1.94741e-11	0.270383	0.776	0.595	2.43231e-07	9	Ten-m
RpL35	1.4647e-14	0.269611	1	0.898	1.82941e-10	9	RpL35
CG7991	1.45116e-09	0.268516	0.536	0.347	1.8125e-05	9	CG7991
jing	1.57068e-08	0.268474	0.423	0.277	0.000196177	9	jing
RpL28	1.29497e-28	0.267788	1	0.974	1.61741e-24	9	RpL28
Hsp262	4.41715e-09	0.267411	0.969	0.852	5.51701e-05	9	Hsp26
CG10960	3.66105e-06	0.267331	0.327	0.216	0.0457266	9	CG10960
put2	4.94948e-05	0.266971	0.454	0.364	0.61819	9	put
Mgstl2	5.74231e-08	0.266627	0.347	0.21	0.000717215	9	Mgstl
RpL312	1.87774e-19	0.26609	1	0.942	2.3453e-15	9	RpL31
RpL38	8.25474e-19	0.265641	1	0.917	1.03102e-14	9	RpL38
klg4	1.63439e-22	0.265477	1	0.76	2.04135e-18	9	klg
RpL29	2.43109e-15	0.265201	0.99	0.881	3.03643e-11	9	RpL29
Mitf	7.87458e-08	0.265166	0.383	0.245	0.000983535	9	Mitf
CG42392	3.61345e-08	0.265083	0.362	0.219	0.00045132	9	CG42392
CG15894	2.27706e-07	0.264957	0.515	0.386	0.00284404	9	CG15894
CG430661	3.67559e-08	0.264737	0.515	0.379	0.000459081	9	CG43066
Ggamma30A2	6.20615e-22	0.262584	1	0.979	7.75149e-18	9	Ggamma30A
elB1	1.59757e-07	0.262521	0.526	0.382	0.00199537	9	elB
rgn3	9.20615e-12	0.262273	0.638	0.428	1.14985e-07	9	rgn
CG86411	1.01614e-09	0.261199	0.454	0.272	1.26916e-05	9	CG8641
dpr35	4.04184e-06	0.260595	0.372	0.25	0.0504826	9	dpr3
RpS7	1.74056e-23	0.259453	1	0.961	2.17396e-19	9	RpS7
MRE163	5.10802e-20	0.257135	1	0.953	6.37991e-16	9	MRE16
PRL-1	3.83105e-09	0.256442	0.638	0.485	4.78498e-05	9	PRL-1
CG126051	3.24218e-08	0.255485	0.811	0.708	0.000404948	9	CG12605
Galphaq	1.15497e-07	0.255256	0.801	0.654	0.00144256	9	Galphaq
hwt1	7.71221e-14	0.254355	0.903	0.78	9.63256e-10	9	hwt
Tnpo	0.000183332	0.25413	0.474	0.406	1	9	Tnpo
Myo81F	2.69341e-15	0.253601	0.985	0.868	3.36407e-11	9	Myo81F
DAAM	0.000269821	0.252985	0.286	0.207	1	9	DAAM
path1	1.88025e-10	0.251594	0.556	0.375	2.34844e-06	9	path
Hrb27C	1.82226e-16	0.251268	0.995	0.919	2.276e-12	9	Hrb27C
CG31140	2.58385e-08	0.251268	0.898	0.709	0.000322723	9	CG31140
CG9281	1.0611e-06	0.250793	0.444	0.329	0.0132531	9	CG9281
Nrt1	1.03365e-13	0.250428	0.862	0.665	1.29103e-09	9	Nrt
qvr3	2.51343e-11	0.250139	0.944	0.851	3.13928e-07	9	qvr
IA-21	3.86321e-52	1.39112	0.939	0.695	4.82515e-48	10	IA-2
Imp2	1.69112e-133	1.25567	0.781	0.143	2.11221e-129	10	Imp
Fer2	5.84952e-90	1.20263	0.316	0.033	7.30605e-86	10	Fer2
Ddc	3.09112e-92	1.17154	0.689	0.159	3.86081e-88	10	Ddc
sNPF	8.14308e-17	1.16694	0.357	0.152	1.01707e-12	10	sNPF
VGlut	1.87995e-28	1.11571	0.403	0.132	2.34805e-24	10	VGlut
CG22691	9.97654e-65	1.08796	0.923	0.537	1.24607e-60	10	CG2269
spab	1.03755e-07	1.06057	0.352	0.203	0.0012959	10	spab
Pcd	2.9057e-78	1.02092	0.827	0.302	3.62922e-74	10	Pcd
heph	6.29368e-19	0.875645	0.913	0.704	7.8608e-15	10	heph
CG45771	3.0906e-34	0.792041	0.704	0.302	3.86016e-30	10	CG4577
Con2	4.76954e-34	0.747843	0.923	0.595	5.95715e-30	10	Con
CG43324	3.72593e-55	0.743279	0.954	0.67	4.65369e-51	10	CG43324
vn	2.11223e-62	0.730648	0.439	0.088	2.63818e-58	10	vn
Cbp53E3	9.41044e-54	0.728032	0.969	0.465	1.17536e-49	10	Cbp53E
hth3	2.74458e-25	0.716141	0.852	0.524	3.42798e-21	10	hth
CG1402	8.506e-18	0.697702	0.372	0.154	1.0624e-13	10	CG1402
Hsp231	2.38761e-34	0.686623	0.995	0.822	2.98212e-30	10	Hsp23
Dhpr	1.01819e-61	0.669874	0.694	0.214	1.27172e-57	10	Dhpr
[truncated: 14,524 more rows]

## Sheet: 2.MaleClusterAnnotations
			Homeotics	Sex Hierarchy	Circadian	Mushroom body	Fast Acting Neurotransmitter									Overlap with Croset (Midbrain)			Overlap with Allen (adult VNC)
Cluster	Cluster Annotations		segment/parasegment				Acetylcholine	Glutamate	GABA		Histamine	Dopamine	Serotonin	Tyramine and Octopamine		Jaccarad Index Overlap >0.05			Jaccarad Index Overlap >0.05
0															0
1	VNC_1		abd-A, Abd-B, Antp, hth, Ubx	dsx					Gad1, VGAT						1	Cluster_J
2															2
3						Fas2									3
4	Octopamine_1														4
5															5
6	Tachykinin_1														6
7															7
8						Fas2									8
9															9
10	ab_KCs_1*					sNPF, Fas2		VGlut							10
11															11	Glia_2
12															12	Glia_2
13	Octopamine_2			fru											13	Glia_2
14	Ellipsoid_Body			fru		Fas2			Gad1, VGAT						14	Ellipsoid_Body, Cluster_J
15	VNC_2		Antp												15
16	Octopamine_3			fru		trio									16
17				fru, dsx			VAChT								17	Cluster_C
18	VNC_3		Antp, Ubx		Pdp1		VAChT, ChAT								18
19							VAChT								19	PN1, Cluster_L
20						Fas2		VGlut	Gad1						20
21															21
22				fru											22
23				Sxl											23
24				dsx			VAChT, ChAT								24
25				fru											25
26					Pdp1	sNPF									26
27	y_KCs_1					ey, Dop1R2, trio, sNPF,Fas2	VAChT								27	ab_KCs, prime_KCs, y_KCs
28	VNC_4		Antp	fru											28	Cluster_L
29															29
30				dsx	tim		VAChT, ChAT								30
31	y_KCs_2					ey, Dop1R2, trio, sNPF, Fas2	VAChT								31	ab_KCs, prime_KCs, y_KCs
32	ab_KCs_2*			fru		sNPF, Fas2									32	Cluster_L
33									Gad1, VGAT						33	Ellipsoid_Body
34				dsx											34
35				fru				VGlut							35
36	VNC_5		Antp, Ubx	fru											36
37	Ilp7_1				Pdp1										37
38					Pdp1	Dop1R2		VGlut							38
39				fru											39
40	Tachykinin_2			fru		sNPF	VAChT, ChAT								40	y_KCs
41				fru		trio	VAChT								41
42				fru			VAChT								42
43				fru				VGlut							43
44															44	Glia_2
45															45	Cluster_L, Ellipsoid_Body,PN2
46															46
47	NPF_1			fru		Dop1R2	VAChT, ChAT								47
48															48
49	Tachykinin_3					Fas2									49
50						Fas2			Gad1, VGAT						50
51					Pdp1	trio	VAChT, ChAT								51	Cluster_A
52															52
53	Tachykinin_4			fru			VAChT								53	Cluster_L
54	Tachykinin_5			fru		Fas2		VGlut							54
55	IIp7_2			dsx	tim	Fas2	VAChT								55
56	Dopamine_1					sNPF						ple			56
57				fru			VAChT, ChAT								57
58	NPF_2			fru					Gad1, VGAT						58	Cluster_J
59	ab_KCs_3					ey, Dop1R2, Fas2			Gad1, VGAT						59
60								VGlut							60
61	Octopamine_4					Fas2	VAChT, ChAT								61
62	Octopamine_5								Gad1, VGAT						62
63	Octopamine_6			fru		Dop1R2			Gad1, VGAT						63
64					Pdp1										64
65	VNC_6		Antp	dsx			VAChT								65
66	Serotonin and Octopamine			fru	cry	Dop1R2		VGlut					SerT		66
67	Dopamine_2			fru		trio, Fas2		VGlut				DAT			67
68				fru		ey	VAChT								68
69	Circadian				per, tim, cry, Clk, vri, Pdp1	Dop1R2		VGlut							69
70					Pdp1	Fas2			Gad1, VGAT						70
71															71	Cluster_L
72				fru	Pdp1	Fas2		VGlut							72	Glia_2
73	VNC_7		Antp						Gad1, VGAT						73
74															74	Cluster_M,Astrocytes, Glia_1, Glia_2
75					tim										75
76															76

## Sheet: 3.FemaleMarkerGenes
	p_val	avg_logFC	pct.1	pct.2	p_val_adj	cluster	gene		Annotation reference
Act42A	1.24917e-72	0.292567	0.992	0.857	1.71836e-68	0	Act42A
Ald	6.99853e-241	0.706408	0.957	0.523	9.62718e-237	0	Ald
app	8.84606e-76	0.319939	0.571	0.279	1.21686e-71	0	app
Atpalpha	3.48862e-111	0.277204	0.999	0.991	4.79894e-107	0	Atpalpha
ATPsynB	2.01308e-81	0.295571	0.989	0.914	2.7692e-77	0	ATPsynB
ATPsynbeta	1.45767e-59	0.276744	0.996	0.958	2.00516e-55	0	ATPsynbeta
ATPsynCF6	8.88783e-139	0.357483	0.992	0.918	1.22261e-134	0	ATPsynCF6
ATPsyndelta	1.25023e-78	0.302105	0.975	0.839	1.71981e-74	0	ATPsyndelta
ATPsynE	2.60208e-72	0.263871	0.984	0.891	3.57942e-68	0	ATPsynE
ATPsynF	1.06108e-144	0.378393	0.993	0.942	1.45963e-140	0	ATPsynF
ATPsyngamma	3.31385e-67	0.262709	0.989	0.898	4.55853e-63	0	ATPsyngamma
beat-Vc	2.2837e-49	0.252598	0.609	0.353	3.14146e-45	0	beat-Vc
beat-VII	1.24901e-72	0.325371	0.554	0.271	1.71813e-68	0	beat-VII
betaTub56D	1.33402e-52	0.300866	0.993	0.917	1.83508e-48	0	betaTub56D
Blimp-1	3.44151e-188	0.391592	0.734	0.27	4.73415e-184	0	Blimp-1
blw	6.64312e-139	0.359714	0.997	0.948	9.13828e-135	0	blw
CadN	4.3126e-59	0.255505	0.99	0.851	5.93242e-55	0	CadN
Calx	2.20109e-67	0.275771	0.904	0.613	3.02782e-63	0	Calx
Cbp53E	1.18384e-188	1.10287	0.851	0.448	1.62849e-184	0	Cbp53E
CG10804	1.91747e-164	0.539364	0.779	0.358	2.63768e-160	0	CG10804
CG11267	1.7023e-115	0.451548	0.956	0.687	2.34169e-111	0	CG11267
CG13108	1.19295e-112	0.398089	0.945	0.59	1.64103e-108	0	CG13108
CG13220	2.29595e-92	0.274121	0.791	0.407	3.1583e-88	0	CG13220
CG14757	0	0.344976	0.413	0.065	0	0	CG14757
CG14989	6.47737e-50	1.00771	0.439	0.254	8.91026e-46	0	CG14989
CG17716	2.26323e-42	0.271914	0.869	0.59	3.1133e-38	0	CG17716
CG18208	8.85004e-37	0.311311	0.823	0.593	1.21741e-32	0	CG18208
CG31808	4.74462e-206	0.36744	0.543	0.152	6.5267e-202	0	CG31808
CG32225	3.91608e-130	0.253106	0.436	0.139	5.38696e-126	0	CG32225
CG33639	2.64165e-45	0.26942	0.65	0.391	3.63385e-41	0	CG33639
CG3402	9.72576e-138	0.39974	0.878	0.467	1.33788e-133	0	CG3402
CG34355	1.25514e-94	0.413497	0.385	0.144	1.72657e-90	0	CG34355
CG3556	1.60212e-93	0.327404	0.872	0.489	2.20388e-89	0	CG3556
CG42265	4.51732e-77	0.307293	0.975	0.749	6.21403e-73	0	CG42265
CG42342	4.51442e-52	0.31944	0.799	0.523	6.21004e-48	0	CG42342
CG43222	3.22161e-65	0.276658	0.957	0.714	4.43164e-61	0	CG43222
CG5758	1.09417e-199	0.569205	0.827	0.37	1.50514e-195	0	CG5758
CG5903	9.94553e-78	0.291203	0.945	0.641	1.36811e-73	0	CG5903
CG6330	9.94353e-190	0.297913	0.53	0.151	1.36783e-185	0	CG6330
CG6878	2.67508e-80	0.269945	0.797	0.428	3.67984e-76	0	CG6878
CG7630	7.34152e-114	0.321688	0.992	0.932	1.0099e-109	0	CG7630
CG7920	2.80258e-86	0.286506	0.854	0.47	3.85522e-82	0	CG7920
CG8861	7.48232e-56	0.392336	0.691	0.422	1.02927e-51	0	CG8861
CG9034	9.14264e-64	0.265526	0.936	0.657	1.25766e-59	0	CG9034
CG9674	4.40485e-109	0.27128	0.731	0.336	6.05931e-105	0	CG9674
CG9919	4.57858e-76	0.279382	0.988	0.805	6.29829e-72	0	CG9919
chrb	1.61465e-33	0.266933	0.994	0.929	2.22112e-29	0	chrb
COX4	9.07153e-81	0.266259	0.995	0.952	1.24788e-76	0	COX4
COX5A	1.53266e-120	0.359594	0.992	0.891	2.10832e-116	0	COX5A
COX5B	1.36066e-119	0.381455	0.979	0.854	1.87172e-115	0	COX5B
COX6B	3.70503e-79	0.259031	0.992	0.92	5.09664e-75	0	COX6B
COX7C	4.69979e-104	0.332396	0.984	0.928	6.46503e-100	0	COX7C
COX8	1.27679e-104	0.342406	0.977	0.891	1.75636e-100	0	COX8
ctp	1.06603e-93	0.263976	0.998	0.94	1.46643e-89	0	ctp
cype	1.32439e-146	0.345432	1	0.955	1.82183e-142	0	cype
Cyt-c-p	2.43457e-207	0.573682	0.983	0.763	3.34899e-203	0	Cyt-c-p
Cyt-c1	1.29821e-80	0.298149	0.961	0.697	1.78582e-76	0	Cyt-c1
Dak1	1.2541e-103	0.349119	0.909	0.558	1.72514e-99	0	Dak1
Dic1	2.20741e-206	0.467078	0.748	0.276	3.03651e-202	0	Dic1
DIP-delta	4.91086e-93	0.282186	0.633	0.296	6.75538e-89	0	DIP-delta
Eno	3.72321e-169	0.547705	0.975	0.652	5.12165e-165	0	Eno
fabp	3.5897e-163	0.518137	0.98	0.797	4.938e-159	0	fabp
fend	6.51043e-49	0.25671	0.913	0.632	8.95575e-45	0	fend
FK506-bp2	1.9051e-93	0.268851	0.998	0.969	2.62065e-89	0	FK506-bp2
FKBP59	9.04755e-64	0.251301	0.915	0.603	1.24458e-59	0	FKBP59
fne	1.41497e-99	0.290592	1	0.989	1.94644e-95	0	fne
fwe	1.40757e-125	0.340277	0.877	0.444	1.93625e-121	0	fwe
Gabat	1.00397e-78	0.268102	0.854	0.487	1.38106e-74	0	Gabat
Gad1	6.5466e-107	0.597183	0.333	0.108	9.0055e-103	0	Gad1
Gapdh1	2.29824e-150	0.512277	0.898	0.48	3.16146e-146	0	Gapdh1
Gapdh2	5.45963e-165	0.522586	0.974	0.71	7.51027e-161	0	Gapdh2
GC1	3.76334e-165	0.271345	0.452	0.127	5.17685e-161	0	GC1
Gdi	8.59681e-93	0.328768	0.981	0.746	1.18258e-88	0	Gdi
Glo1	6.50031e-230	0.349975	0.615	0.174	8.94182e-226	0	Glo1
Hasp	2.2244e-109	0.353475	0.951	0.596	3.05988e-105	0	Hasp
hdc	3.98634e-101	0.500945	0.776	0.409	5.48361e-97	0	hdc
Hs3st-B	3.34252e-133	0.386485	0.858	0.44	4.59797e-129	0	Hs3st-B
Hsp23	5.59096e-268	0.923599	0.979	0.731	7.69093e-264	0	Hsp23
Hsp27	5.73296e-67	0.278121	0.886	0.574	7.88626e-63	0	Hsp27
Hsp67Ba	2.18969e-201	0.671577	0.971	0.616	3.01214e-197	0	Hsp67Ba
hth	1.5504e-109	0.817527	0.881	0.552	2.13273e-105	0	hth
IA-2	1.05792e-42	0.343646	0.932	0.725	1.45527e-38	0	IA-2
igl	4.27407e-36	0.275105	0.919	0.684	5.87942e-32	0	igl
Imp	0	1.15538	0.852	0.158	0	0	Imp
IscU	1.30497e-86	0.319711	0.951	0.68	1.79512e-82	0	IscU
Jafrac1	4.7491e-89	0.308072	0.97	0.72	6.53286e-85	0	Jafrac1
kcc	1.41796e-109	0.367165	0.935	0.591	1.95055e-105	0	kcc
kdn	4.35471e-96	0.319848	0.842	0.469	5.99034e-92	0	kdn
levy	2.2297e-71	0.250539	0.992	0.921	3.06717e-67	0	levy
Lim1	7.76948e-36	0.333917	0.295	0.151	1.06877e-31	0	Lim1
Lrp4	4.82655e-97	0.274081	0.831	0.427	6.6394e-93	0	Lrp4
mamo	1.26508e-80	0.622226	0.79	0.51	1.74024e-76	0	mamo
mbl	1.53741e-64	0.585034	0.9	0.622	2.11486e-60	0	mbl
mei-P26	4.05049e-73	0.286191	0.995	0.917	5.57185e-69	0	mei-P26
Men	7.09312e-165	0.343713	0.626	0.22	9.7573e-161	0	Men
mGluR	8.42962e-69	0.268739	0.621	0.318	1.15958e-64	0	mGluR
Mp	1.64509e-62	0.450177	0.905	0.684	2.26299e-58	0	Mp
Msp300	2.81966e-122	0.408637	0.994	0.857	3.87873e-118	0	Msp300
nAChRalpha6	8.79992e-51	0.355074	0.951	0.706	1.21052e-46	0	nAChRalpha6
ND-13A	4.40331e-84	0.311671	0.947	0.627	6.05719e-80	0	ND-13A
ND-30	8.01411e-92	0.289824	0.848	0.459	1.10242e-87	0	ND-30
ND-ACP	1.72636e-67	0.254939	0.982	0.852	2.37478e-63	0	ND-ACP
ND-B12	8.59994e-60	0.264609	0.961	0.744	1.18301e-55	0	ND-B12
ND-B14.7	4.48467e-94	0.311751	0.864	0.485	6.16911e-90	0	ND-B14.7
ND-MLRQ	4.41081e-86	0.290297	0.987	0.883	6.06751e-82	0	ND-MLRQ
Neb-cGP	7.4172e-139	0.376396	0.988	0.884	1.02031e-134	0	Neb-cGP
NetB	1.75209e-23	0.264029	0.581	0.4	2.41018e-19	0	NetB
Nlp	1.44205e-127	0.408128	0.93	0.557	1.98369e-123	0	Nlp
Nmdar2	1.10304e-103	0.307777	0.683	0.313	1.51734e-99	0	Nmdar2
Nplp1	4.47708e-138	0.314744	0.51	0.175	6.15867e-134	0	Nplp1
nrv3	1.54575e-167	0.277675	1	0.991	2.12633e-163	0	nrv3
nSyb	2.37079e-97	0.271527	0.998	0.951	3.26126e-93	0	nSyb
nwk	1.20157e-85	0.268875	0.829	0.443	1.65287e-81	0	nwk
P5CDh1	2.60651e-168	0.330923	0.65	0.23	3.58552e-164	0	P5CDh1
Pcd	2.6044e-81	0.294487	0.661	0.317	3.58261e-77	0	Pcd
Pgi	1.58764e-157	0.300912	0.535	0.17	2.18396e-153	0	Pgi
Pgk	6.49556e-181	0.570475	0.946	0.551	8.93529e-177	0	Pgk
Pglym78	5.49667e-223	0.582875	0.935	0.476	7.56121e-219	0	Pglym78
PhKgamma	2.00441e-98	0.262062	0.844	0.427	2.75727e-94	0	PhKgamma
porin	1.38474e-133	0.300301	0.999	0.97	1.90485e-129	0	porin
prim	4.13211e-84	0.286365	0.945	0.601	5.68413e-80	0	prim
PyK	3.00904e-300	0.412681	0.634	0.158	4.13923e-296	0	PyK
QIL1	4.30148e-90	0.316253	0.883	0.513	5.91711e-86	0	QIL1
Rab3	8.51035e-75	0.269949	0.922	0.603	1.17068e-70	0	Rab3
Rbp6	1.04229e-73	0.362487	0.99	0.924	1.43377e-69	0	Rbp6
RFeSP	5.32101e-83	0.298725	0.977	0.855	7.31958e-79	0	RFeSP
rin	1.79254e-93	0.290103	0.993	0.855	2.46581e-89	0	rin
salm	3.82639e-126	0.48754	0.336	0.097	5.26358e-122	0	salm
salr	1.68717e-138	0.620547	0.356	0.101	2.32087e-134	0	salr
Sap47	1.41624e-194	0.434654	0.999	0.94	1.94819e-190	0	Sap47
Scp2	3.38864e-62	0.584056	0.261	0.096	4.66141e-58	0	Scp2
Scsalpha	5.14316e-72	0.272259	0.958	0.684	7.07493e-68	0	Scsalpha
SdhC	4.54327e-83	0.312739	0.922	0.603	6.24972e-79	0	SdhC
sesB	2.59843e-220	0.520818	0.999	0.93	3.5744e-216	0	sesB
SIFaR	2.94817e-128	0.284211	0.689	0.279	4.0555e-124	0	SIFaR
slgA	4.21899e-149	0.535505	0.975	0.736	5.80364e-145	0	slgA
Sod1	5.37339e-223	0.52653	0.989	0.846	7.39164e-219	0	Sod1
Sod2	5.8185e-87	0.332048	0.915	0.615	8.00394e-83	0	Sod2
SPoCk	2.09775e-71	0.289264	0.862	0.528	2.88567e-67	0	SPoCk
Ssadh	3.80454e-106	0.316692	0.541	0.223	5.23353e-102	0	Ssadh
Ssb-c31a	5.64411e-85	0.295845	0.872	0.517	7.76404e-81	0	Ssb-c31a
sun	8.14385e-121	0.38902	0.976	0.78	1.12027e-116	0	sun
Sytbeta	6.12407e-81	0.276424	0.45	0.186	8.42427e-77	0	Sytbeta
Tim8	3.72586e-102	0.325755	0.886	0.502	5.1253e-98	0	Tim8
tko	5.03422e-109	0.301798	0.838	0.427	6.92507e-105	0	tko
TM4SF	5.03799e-83	0.297665	0.939	0.575	6.93025e-79	0	TM4SF
Tob	3.47214e-73	0.300489	0.927	0.616	4.77627e-69	0	Tob
Tpi	8.23596e-221	0.567716	0.909	0.432	1.13294e-216	0	Tpi
tsh	2.52971e-82	0.338241	0.281	0.092	3.47987e-78	0	tsh
tsr	8.25463e-97	0.421006	0.977	0.807	1.13551e-92	0	tsr
unc-13-4A	5.25048e-148	0.434444	0.657	0.261	7.22256e-144	0	unc-13-4A
UQCR-14	1.00882e-127	0.380865	0.982	0.844	1.38773e-123	0	UQCR-14
UQCR-6.4	5.6419e-85	0.325271	0.959	0.771	7.761e-81	0	UQCR-6.4
UQCR-C2	8.35565e-75	0.281564	0.961	0.732	1.1494e-70	0	UQCR-C2
UQCR-Q	2.04312e-150	0.453446	0.98	0.856	2.81052e-146	0	UQCR-Q
VGAT	1.63653e-131	0.324413	0.44	0.143	2.25121e-127	0	VGAT
VGlut	1.76494e-59	1.11005	0.301	0.129	2.42785e-55	0	VGlut
Vha26	1.31271e-80	0.294183	0.972	0.719	1.80576e-76	0	Vha26
Vha44	1.17074e-74	0.281134	0.931	0.588	1.61047e-70	0	Vha44
Vha55	7.99222e-77	0.266564	0.907	0.567	1.09941e-72	0	Vha55
vn	2.15119e-73	0.283978	0.269	0.09	2.95918e-69	0	vn
Wnt4	2.08394e-55	0.559527	0.308	0.13	2.86667e-51	0	Wnt4
zfh2	1.53241e-81	0.44876	0.273	0.091	2.10798e-77	0	zfh2
18w	1.68494e-16	0.336232	0.26	0.173	2.3178e-12	1	18w
5-HT1A	0	1.60468	0.993	0.521	0	1	5-HT1A
Adk1	3.54474e-34	0.503058	0.367	0.227	4.87615e-30	1	Adk1
Akap200	2.82481e-15	0.254437	0.64	0.633	3.88581e-11	1	Akap200
alpha-Man-Ia	5.2039e-48	0.546566	0.425	0.256	7.15848e-44	1	alpha-Man-Ia
ap	4.55489e-180	0.766451	0.707	0.269	6.2657e-176	1	ap
AstC-R1	6.3884e-63	0.583572	0.438	0.225	8.78788e-59	1	AstC-R1
Atox1	1.1227e-100	0.399939	0.99	0.936	1.54438e-96	1	Atox1
awd	3.58832e-58	0.346571	0.944	0.876	4.93609e-54	1	awd
beat-IIIb	2.44323e-131	0.692345	0.816	0.501	3.36091e-127	1	beat-IIIb
boca	5.53306e-11	0.26021	0.491	0.488	7.61128e-07	1	boca
bru3	6.91532e-81	0.403402	0.984	0.788	9.51271e-77	1	bru3
CaBP1	3.08534e-33	0.415761	0.585	0.506	4.24419e-29	1	CaBP1
CadN2	1.24141e-05	0.255949	0.389	0.389	0.170768	1	CadN2
Calr	3.7674e-85	0.509745	0.936	0.852	5.18244e-81	1	Calr
CanB2	3.3072e-70	0.343707	0.98	0.888	4.54939e-66	1	CanB2
caps	3.62266e-153	0.829097	0.793	0.487	4.98333e-149	1	caps
CCKLR-17D3	8.40998e-38	0.451216	0.441	0.284	1.15688e-33	1	CCKLR-17D3
cdi	5.18965e-19	0.258674	0.741	0.751	7.13889e-15	1	cdi
CG11360	5.85826e-37	0.294879	0.892	0.856	8.05863e-33	1	CG11360
CG11638	1.28671e-45	0.566033	0.543	0.42	1.76999e-41	1	CG11638
CG11873	1.26543e-14	0.260715	0.635	0.654	1.74072e-10	1	CG11873
CG12991	1.76776e-32	0.422992	0.594	0.523	2.43173e-28	1	CG12991
CG13594	3.97299e-159	0.845718	0.753	0.428	5.46524e-155	1	CG13594
CG13685	1.02601e-303	1.33068	0.897	0.514	1.41138e-299	1	CG13685
CG13698	1.64806e-129	0.754367	0.384	0.116	2.26707e-125	1	CG13698
CG13920	1.443e-117	0.442163	0.989	0.952	1.985e-113	1	CG13920
CG14024	3.36949e-34	0.412264	0.653	0.555	4.63507e-30	1	CG14024
CG14321	4.46431e-47	0.373186	0.776	0.714	6.1411e-43	1	CG14321
CG14535	2.49758e-115	0.779757	0.675	0.424	3.43567e-111	1	CG14535
CG14853	1.46375e-11	0.331034	0.288	0.225	2.01354e-07	1	CG14853
CG14883	2.02371e-10	0.307608	0.346	0.304	2.78381e-06	1	CG14883
CG15012	4.82687e-43	0.312176	0.874	0.867	6.63984e-39	1	CG15012
CG15522	2.46396e-37	0.485516	0.524	0.384	3.38942e-33	1	CG15522
CG17124	1.03426e-58	0.345825	0.946	0.879	1.42272e-54	1	CG17124
CG17270	9.6221e-86	0.497618	0.873	0.76	1.32362e-81	1	CG17270
CG30116	5.72133e-19	0.254391	0.651	0.573	7.87026e-15	1	CG30116
CG30172	3.06937e-117	0.358952	0.998	0.969	4.22223e-113	1	CG30172
CG30463	9.94052e-167	0.870088	0.859	0.572	1.36742e-162	1	CG30463
CG31460	2.02678e-08	0.289615	0.37	0.349	0.000278804	1	CG31460
CG31522	7.29029e-06	0.296499	0.342	0.338	0.100285	1	CG31522
CG31637	2.11749e-72	0.534233	0.691	0.51	2.91282e-68	1	CG31637
CG3198	2.72874e-09	0.273623	0.501	0.515	3.75366e-05	1	CG3198
CG32052	3.37046e-82	0.605313	0.474	0.23	4.63641e-78	1	CG32052
CG32369	4.61618e-30	0.443438	0.498	0.401	6.35002e-26	1	CG32369
CG32373	1.74415e-168	0.6518	0.325	0.067	2.39925e-164	1	CG32373
CG32428	7.9018e-09	0.300019	0.402	0.391	0.000108697	1	CG32428
CG32521	1.35373e-239	1.01545	0.786	0.349	1.86219e-235	1	CG32521
CG32698	1.45893e-32	0.30448	0.457	0.285	2.00691e-28	1	CG32698
CG32772	3.47382e-17	0.336822	0.467	0.418	4.77858e-13	1	CG32772
CG33543	5.80086e-130	0.643284	0.899	0.579	7.97967e-126	1	CG33543
CG33977	4.424e-28	0.36147	0.595	0.564	6.08565e-24	1	CG33977
CG34113	0	1.17596	0.995	0.797	0	1	CG34113
CG34136	0	1.36472	0.949	0.545	0	1	CG34136
CG34155	1.14284e-197	0.930195	0.785	0.37	1.57209e-193	1	CG34155
CG34353	0	1.55233	0.996	0.661	0	1	CG34353
CG34354	4.55708e-51	0.42502	0.817	0.662	6.26872e-47	1	CG34354
CG34371	1.01023e-195	0.998062	0.783	0.398	1.38967e-191	1	CG34371
CG34384	1.49504e-25	0.371777	0.452	0.343	2.05657e-21	1	CG34384
CG3625	2.12783e-29	0.333873	0.729	0.694	2.92705e-25	1	CG3625
CG422651	9.00596e-30	0.333683	0.811	0.76	1.23886e-25	1	CG42265
CG42313	4.72631e-63	0.36117	0.94	0.738	6.50152e-59	1	CG42313
CG42324	2.10212e-11	0.307673	0.411	0.368	2.89167e-07	1	CG42324
CG42339	7.81054e-57	0.492598	0.555	0.347	1.07442e-52	1	CG42339
CG42340	8.31396e-127	0.630283	0.914	0.728	1.14367e-122	1	CG42340
CG42389	9.94026e-118	0.609696	0.868	0.676	1.36738e-113	1	CG42389
CG42540	6.27591e-300	0.956107	0.998	0.928	8.63314e-296	1	CG42540
CG42541	6.17414e-42	0.269932	0.94	0.816	8.49315e-38	1	CG42541
CG42673	6.31992e-214	1.01228	0.677	0.271	8.69368e-210	1	CG42673
CG4546	0	0.666133	0.268	0.019	0	1	CG4546
CG4741	1.45852e-91	0.554702	0.288	0.087	2.00633e-87	1	CG4741
CG4829	4.79451e-296	1.10785	0.727	0.218	6.59533e-292	1	CG4829
CG6024	1.21215e-202	0.86577	0.903	0.664	1.66743e-198	1	CG6024
CG7369	8.64682e-06	0.251566	0.311	0.295	0.118946	1	CG7369
CG8300	1.19935e-09	0.310512	0.356	0.32	1.64982e-05	1	CG8300
CG9109	1.02643e-198	0.795988	0.458	0.107	1.41196e-194	1	CG9109
cmpy	0	1.68946	1	0.814	0	1	cmpy
COX7A	3.12866e-65	0.297931	0.986	0.944	4.30378e-61	1	COX7A
CR45312	7.34079e-71	0.558447	0.666	0.442	1.0098e-66	1	CR45312
CR45668	2.78059e-19	0.366973	0.298	0.202	3.82498e-15	1	CR45668
CR45758	3.46554e-106	0.585251	0.877	0.708	4.7672e-102	1	CR45758
CR46003	9.78451e-99	0.633006	0.329	0.103	1.34596e-94	1	CR46003
ct	7.46311e-80	0.388562	0.618	0.284	1.02662e-75	1	ct
dlp	9.91669e-53	0.543945	0.38	0.196	1.36414e-48	1	dlp
dpr13	3.81578e-202	0.84271	0.97	0.667	5.24899e-198	1	dpr13
dpr14	3.1129e-23	0.263404	0.787	0.773	4.28211e-19	1	dpr14
dpr15	7.80607e-50	0.519419	0.468	0.295	1.0738e-45	1	dpr15
dpr18	1.24326e-103	0.714678	0.553	0.28	1.71023e-99	1	dpr18
dpr20	1.48206e-51	0.502679	0.494	0.3	2.03872e-47	1	dpr20
dpr4	1.44563e-15	0.339461	0.492	0.46	1.98861e-11	1	dpr4
dpr5	2.49117e-230	1.00359	0.823	0.408	3.42686e-226	1	dpr5
dpr8	3.42949e-156	0.638326	0.961	0.826	4.71761e-152	1	dpr8
drl	1.60002e-93	0.61686	0.704	0.463	2.20098e-89	1	drl
Dscam4	6.90463e-87	0.454263	0.902	0.737	9.49801e-83	1	Dscam4
eEF5	6.49323e-98	0.308451	0.996	0.977	8.93209e-94	1	eEF5
Efa6	6.41342e-36	0.493974	0.466	0.345	8.8223e-32	1	Efa6
Eip93F	0	1.29392	0.981	0.491	0	1	Eip93F
Ephrin	1.04214e-07	0.270725	0.441	0.443	0.00143356	1	Ephrin
Flo1	2.31212e-16	0.26834	0.548	0.513	3.18056e-12	1	Flo1
fred	4.69787e-145	0.657063	0.874	0.508	6.46239e-141	1	fred
fru	1.52161e-294	1.04625	0.999	0.908	2.09313e-290	1	fru
ftz-f1	6.92284e-90	0.670862	0.674	0.432	9.52305e-86	1	ftz-f1
fz2	1.37358e-267	0.95094	0.983	0.777	1.88949e-263	1	fz2
glec	2.18727e-48	0.447266	0.661	0.528	3.00881e-44	1	glec
GluClalpha	3.75646e-126	0.51802	0.986	0.913	5.16738e-122	1	GluClalpha
GluRIA	3.10855e-55	0.449026	0.694	0.507	4.27612e-51	1	GluRIA
GluRIB	7.79028e-66	0.36574	0.878	0.645	1.07163e-61	1	GluRIB
Gp93	2.52008e-08	0.281312	0.455	0.459	0.000346662	1	Gp93
gpp	1.49899e-76	0.549468	0.831	0.74	2.06201e-72	1	gpp
Gycbeta100B	3.49391e-35	0.44841	0.446	0.306	4.80622e-31	1	Gycbeta100B
ham	0	1.48527	0.862	0.156	0	1	ham
hbs	5.44198e-51	0.480873	0.481	0.292	7.48598e-47	1	hbs
HmgD	4.58124e-25	0.302665	0.737	0.716	6.30195e-21	1	HmgD
Hr4	9.87249e-43	0.285195	0.923	0.911	1.35806e-38	1	Hr4
jeb	1.88197e-108	0.581095	0.905	0.738	2.58884e-104	1	jeb
JIL-1	2.08022e-18	0.290939	0.594	0.593	2.86155e-14	1	JIL-1
Jupiter	5.70268e-78	0.331673	0.985	0.961	7.8446e-74	1	Jupiter
KrT95D	6.40756e-194	0.937757	0.943	0.828	8.81424e-190	1	KrT95D
Lar	2.1985e-186	0.665146	0.983	0.913	3.02426e-182	1	Lar
lbk	1.58292e-267	1.17559	0.892	0.514	2.17747e-263	1	lbk
LRR	0.00182574	0.259103	0.412	0.466	1	1	LRR
mago	1.94012e-08	0.257502	0.446	0.454	0.000266883	1	mago
mam	5.99329e-74	0.457925	0.918	0.853	8.24437e-70	1	mam
mamo1	2.51181e-36	0.266121	0.758	0.516	3.45524e-32	1	mamo
MFS17	1.49323e-11	0.25897	0.589	0.616	2.05408e-07	1	MFS17
Mical	1.32481e-10	0.294236	0.377	0.334	1.82241e-06	1	Mical
Moe	1.06653e-13	0.260296	0.593	0.597	1.46712e-09	1	Moe
nAChRalpha5	2.90046e-205	0.532443	1	0.976	3.98987e-201	1	nAChRalpha5
Nca	2.12848e-23	0.332269	0.584	0.549	2.92793e-19	1	Nca
Nlg3	8.59165e-48	0.263238	0.974	0.899	1.18187e-43	1	Nlg3
nmo	2.34736e-51	0.273867	0.96	0.929	3.22903e-47	1	nmo
nolo	1.27979e-42	0.34579	0.663	0.496	1.76049e-38	1	nolo
Nos	0	1.655	0.724	0.147	0	1	Nos
nrm	6.23397e-42	0.346413	0.79	0.711	8.57545e-38	1	nrm
nrv2	4.90324e-89	0.53855	0.858	0.725	6.74489e-85	1	nrv2
NUCB1	2.21765e-22	0.282706	0.715	0.707	3.0506e-18	1	NUCB1
Oct-TyrR	7.32838e-181	0.886271	0.816	0.442	1.00809e-176	1	Oct-TyrR
Oli	4.50268e-10	0.265085	0.472	0.468	6.19389e-06	1	Oli
Pde6	2.86196e-80	0.453551	0.922	0.77	3.93691e-76	1	Pde6
pgant2	3.23893e-186	0.924164	0.75	0.384	4.45547e-182	1	pgant2
pHCl-1	2.02198e-24	0.279852	0.638	0.524	2.78143e-20	1	pHCl-1
pigs	1.04146e-42	0.497601	0.518	0.373	1.43263e-38	1	pigs
PKD	1.06256e-40	0.478687	0.352	0.201	1.46165e-36	1	PKD
Plc21C	4.47629e-19	0.332091	0.682	0.691	6.15759e-15	1	Plc21C
plum	7.00849e-67	0.59305	0.628	0.437	9.64088e-63	1	plum
plx	3.18251e-13	0.321419	0.45	0.412	4.37787e-09	1	plx
prage	2.72295e-13	0.310085	0.259	0.179	3.74568e-09	1	prage
prod	2.85302e-24	0.415755	0.447	0.37	3.92461e-20	1	prod
Prosalpha5	3.32497e-14	0.297516	0.513	0.498	4.57382e-10	1	Prosalpha5
Ptp10D	2.63464e-43	0.378026	0.742	0.655	3.62421e-39	1	Ptp10D
Pxn	1.2286e-143	0.654477	0.861	0.524	1.69007e-139	1	Pxn
qm	8.98981e-96	0.622426	0.39	0.15	1.23664e-91	1	qm
qtc	8.26183e-25	0.382077	0.599	0.571	1.1365e-20	1	qtc
Rm62	4.05826e-33	0.263156	0.918	0.907	5.58254e-29	1	Rm62
robo3	5.52269e-68	0.578382	0.524	0.306	7.59701e-64	1	robo3
RpLP0	1.18033e-65	0.337044	0.974	0.954	1.62366e-61	1	RpLP0
S	2.36949e-07	0.252431	0.456	0.471	0.00325947	1	S
sbb	2.31163e-63	0.307819	0.968	0.943	3.17987e-59	1	sbb
sca	1.82481e-24	0.437999	0.462	0.353	2.5102e-20	1	sca
scro	1.34948e-86	0.500584	0.554	0.245	1.85635e-82	1	scro
scyl	2.5849e-107	0.607513	0.915	0.787	3.55579e-103	1	scyl
sdt	2.96033e-264	1.00979	0.97	0.844	4.07222e-260	1	sdt
sfl	1.01435e-71	0.630629	0.578	0.379	1.39534e-67	1	sfl
Shawl	6.24847e-40	0.470944	0.538	0.397	8.59539e-36	1	Shawl
shep	1.25768e-211	0.509256	1	0.989	1.73006e-207	1	shep
smal	1.1322e-137	0.788974	0.831	0.596	1.55745e-133	1	smal
smt3	9.53356e-44	0.251286	0.976	0.96	1.31144e-39	1	smt3
snRNA:7SK	5.68127e-25	0.302716	0.787	0.784	7.81516e-21	1	snRNA:7SK
Sox102F	7.39095e-47	0.290371	0.379	0.17	1.0167e-42	1	Sox102F
SP2353	7.5445e-126	0.72304	0.851	0.684	1.03782e-121	1	SP2353
spab	4.23198e-125	0.555075	0.674	0.31	5.82151e-121	1	spab
Spase12	3.01607e-09	0.252648	0.465	0.467	4.14891e-05	1	Spase12
Spn	1.71084e-234	0.63616	0.998	0.967	2.35344e-230	1	Spn
ST6Gal	5.45876e-21	0.331588	0.341	0.23	7.50907e-17	1	ST6Gal
stai	0	0.931444	1	0.959	0	1	stai
stan	1.20901e-54	0.544198	0.437	0.249	1.66311e-50	1	stan
Su(var)205	6.05855e-54	0.382488	0.859	0.801	8.33415e-50	1	Su(var)205
tai	7.0105e-21	0.309263	0.665	0.655	9.64364e-17	1	tai
Tbh	8.50111e-91	0.628753	0.371	0.142	1.16941e-86	1	Tbh
Ten-m	1.26674e-25	0.34424	0.686	0.617	1.74252e-21	1	Ten-m
ths	1.67254e-82	0.671013	0.609	0.406	2.30074e-78	1	ths
toy	3.88406e-77	0.430667	0.883	0.538	5.34291e-73	1	toy
Trim9	1.03696e-85	0.549999	0.735	0.469	1.42644e-81	1	Trim9
trn	8.89903e-265	1.33563	0.879	0.463	1.22415e-260	1	trn
trv	3.45879e-201	0.675631	1	0.865	4.75791e-197	1	trv
Tsp39D	3.0723e-27	0.261462	0.793	0.795	4.22626e-23	1	Tsp39D
U4-U6-60K	9.60824e-11	0.292039	0.455	0.448	1.32171e-06	1	U4-U6-60K
viaf	3.86523e-13	0.267539	0.554	0.563	5.31702e-09	1	viaf
Vsx1	3.54817e-109	0.522346	0.276	0.068	4.88086e-105	1	Vsx1
Wdr62	5.1475e-19	0.286873	0.729	0.738	7.0809e-15	1	Wdr62
wit	5.00972e-13	0.2836	0.26	0.184	6.89137e-09	1	wit
X11Lbeta	2.84056e-77	0.555342	0.775	0.63	3.90748e-73	1	X11Lbeta
Xbp1	2.5819e-09	0.295614	0.433	0.422	3.55166e-05	1	Xbp1
ytr	2.24221e-07	0.265367	0.314	0.277	0.00308438	1	ytr
Ac13E	3.47909e-118	0.531273	0.392	0.118	4.78583e-114	2	Ac13E
Ace	6.80172e-76	0.422387	0.918	0.768	9.35645e-72	2	Ace
ap1	0	1.16504	0.887	0.263	0	2	ap
AstA-R1	3.35796e-81	0.469565	0.408	0.158	4.61921e-77	2	AstA-R1
AstC-R11	1.11679e-99	0.548228	0.535	0.222	1.53626e-95	2	AstC-R1
AstC-R2	4.00819e-61	0.274343	0.677	0.4	5.51367e-57	2	AstC-R2
Atf3	1.10725e-33	0.352298	0.306	0.159	1.52313e-29	2	Atf3
Atox11	7.98241e-71	0.318417	0.995	0.936	1.09806e-66	2	Atox1
Bacc	1.72298e-77	0.268599	1	0.993	2.37013e-73	2	Bacc
beat-IIIb1	1.4787e-166	0.723868	0.894	0.499	2.0341e-162	2	beat-IIIb
beat-Va	5.27349e-38	0.413253	0.519	0.344	7.25421e-34	2	beat-Va
beat-Vc1	1.01781e-92	0.575149	0.661	0.355	1.40009e-88	2	beat-Vc
beat-VI	1.76225e-139	0.606698	0.924	0.55	2.42416e-135	2	beat-VI
bi	0	1.41976	0.983	0.279	0	2	bi
bma	5.17679e-175	0.703165	0.653	0.234	7.12119e-171	2	bma
brat	1.3039e-56	0.35748	0.951	0.857	1.79365e-52	2	brat
bru1	6.36103e-54	0.380867	0.549	0.302	8.75023e-50	2	bru1
Bx	0	1.80054	0.991	0.416	0	2	Bx
Ca-alpha1T	2.09005e-306	1.14253	0.971	0.522	2.87507e-302	2	Ca-alpha1T
CanA-14F	3.41826e-64	0.365335	0.948	0.861	4.70216e-60	2	CanA-14F
caps1	1.02768e-106	0.567755	0.805	0.487	1.41368e-102	2	caps
CCKLR-17D31	4.16651e-38	0.387694	0.477	0.282	5.73145e-34	2	CCKLR-17D3
CG10384	9.84042e-243	1.04598	0.922	0.541	1.35365e-238	2	CG10384
CG118731	1.16699e-29	0.257614	0.761	0.648	1.60531e-25	2	CG11873
CG12065	3.24152e-59	0.33406	0.289	0.102	4.45904e-55	2	CG12065
CG12290	1.10225e-74	0.524968	0.378	0.15	1.51625e-70	2	CG12290
CG12484	9.10099e-190	0.819465	0.77	0.344	1.25193e-185	2	CG12484
CG12605	1.52252e-48	0.336192	0.887	0.784	2.09438e-44	2	CG12605
CG129911	2.61577e-28	0.271817	0.652	0.52	3.59826e-24	2	CG12991
CG13055	1.67239e-25	0.2728	0.702	0.591	2.30055e-21	2	CG13055
CG13300	2.67709e-15	0.265744	0.4	0.3	3.6826e-11	2	CG13300
CG140241	2.56084e-125	0.74306	0.818	0.548	3.5227e-121	2	CG14024
CG14082	3.65484e-100	0.530308	0.464	0.177	5.0276e-96	2	CG14082
CG14186	1.27985e-189	1.00533	0.846	0.486	1.76056e-185	2	CG14186
CG14431	6.62498e-36	0.333082	0.356	0.189	9.11333e-32	2	CG14431
CG14459	1.78238e-82	0.436407	0.565	0.248	2.45184e-78	2	CG14459
CG14762	3.26474e-86	0.517095	0.81	0.538	4.49098e-82	2	CG14762
CG1504	3.25825e-49	0.364092	0.495	0.273	4.48205e-45	2	CG1504
CG15765	1.52679e-60	0.254111	0.924	0.647	2.10026e-56	2	CG15765
CG15894	4.07099e-23	0.310419	0.552	0.451	5.60006e-19	2	CG15894
CG1688	1.41783e-56	0.382521	0.58	0.32	1.95037e-52	2	CG1688
CG17075	3.54975e-19	0.302654	0.382	0.272	4.88304e-15	2	CG17075
CG171241	7.99681e-227	0.702852	0.995	0.877	1.10004e-222	2	CG17124
CG17816	5.2879e-39	0.257389	0.948	0.856	7.27403e-35	2	CG17816
CG2201	1.61075e-31	0.32076	0.492	0.327	2.21575e-27	2	CG2201
CG2865	2.22408e-28	0.357292	0.601	0.48	3.05945e-24	2	CG2865
CG30419	9.6598e-42	0.33333	0.497	0.296	1.3288e-37	2	CG30419
CG31140	3.56617e-30	0.27318	0.9	0.788	4.90562e-26	2	CG31140
CG31221	0	1.51088	1	0.642	0	2	CG31221
CG31324	5.0342e-174	0.833463	0.762	0.358	6.92505e-170	2	CG31324
CG316371	2.42416e-28	0.254978	0.656	0.512	3.33467e-24	2	CG31637
CG31676	4.4223e-158	0.678776	0.636	0.215	6.08331e-154	2	CG31676
CG32486	3.05681e-32	0.357189	0.656	0.543	4.20495e-28	2	CG32486
CG32506	6.94179e-18	0.321932	0.589	0.499	9.54913e-14	2	CG32506
CG32767	1.58846e-32	0.27288	0.899	0.827	2.18509e-28	2	CG32767
CG32982	4.98527e-66	0.412015	0.684	0.417	6.85774e-62	2	CG32982
CG33143	6.535e-104	0.540585	0.927	0.732	8.98955e-100	2	CG33143
CG33181	2.38955e-27	0.283224	0.52	0.364	3.28707e-23	2	CG33181
CG34114	1.23765e-109	0.522455	0.931	0.704	1.70251e-105	2	CG34114
CG343541	2.3046e-65	0.385484	0.902	0.659	3.17021e-61	2	CG34354
CG34383	1.40884e-92	0.449588	0.93	0.746	1.938e-88	2	CG34383
CG343841	1.95529e-28	0.306177	0.495	0.342	2.6897e-24	2	CG34384
CG34401	3.01024e-89	0.451748	0.931	0.821	4.14089e-85	2	CG34401
CG3638	1.11333e-73	0.454658	0.858	0.696	1.53149e-69	2	CG3638
CG3655	6.31515e-62	0.436839	0.617	0.36	8.68712e-58	2	CG3655
CG3726	8.56674e-146	0.74694	0.783	0.401	1.17844e-141	2	CG3726
CG3967	9.83124e-16	0.284669	0.681	0.63	1.35239e-11	2	CG3967
CG423131	3.77851e-142	0.641027	0.976	0.737	5.19772e-138	2	CG42313
CG42322	2.25687e-27	0.341425	0.597	0.485	3.10456e-23	2	CG42322
CG42346	1.17924e-54	0.44866	0.515	0.291	1.62216e-50	2	CG42346
CG42392	2.5923e-27	0.341934	0.326	0.189	3.56597e-23	2	CG42392
CG42450	7.86123e-25	0.25587	0.832	0.773	1.08139e-20	2	CG42450
CG42492	7.30621e-97	0.292543	1	0.984	1.00504e-92	2	CG42492
CG42594	4.28205e-168	0.697523	0.864	0.489	5.89038e-164	2	CG42594
CG42674	4.60336e-54	0.374981	0.812	0.617	6.33238e-50	2	CG42674
CG42750	3.92597e-158	0.628501	0.975	0.712	5.40056e-154	2	CG42750
CG42784	2.56331e-12	0.254075	0.29	0.212	3.52609e-08	2	CG42784
CG43066	1.87944e-26	0.329427	0.594	0.482	2.58536e-22	2	CG43066
CG43143	1.10874e-48	0.376195	0.755	0.566	1.52518e-44	2	CG43143
CG43347	5.68323e-32	0.31373	0.656	0.522	7.81786e-28	2	CG43347
CG43658	2.10904e-134	0.556585	0.922	0.562	2.9012e-130	2	CG43658
CG43737	4.04308e-150	0.595748	0.983	0.807	5.56166e-146	2	CG43737
CG43759	3.04799e-250	0.994347	0.898	0.418	4.19281e-246	2	CG43759
CG43778	1.79589e-20	0.312933	0.44	0.33	2.47043e-16	2	CG43778
CG4577	2.8997e-27	0.393342	0.453	0.312	3.98882e-23	2	CG4577
CG60241	6.03411e-75	0.469243	0.843	0.668	8.30053e-71	2	CG6024
CG6051	2.08011e-17	0.262985	0.273	0.173	2.8614e-13	2	CG6051
CG6959	7.98788e-125	0.711055	0.786	0.443	1.09881e-120	2	CG6959
CG7991	3.95122e-85	0.552811	0.66	0.359	5.4353e-81	2	CG7991
CG8500	3.94946e-35	0.330917	0.64	0.487	5.43287e-31	2	CG8500
CG8641	3.45989e-76	0.493376	0.491	0.234	4.75943e-72	2	CG8641
CG8910	2.61937e-34	0.352435	0.493	0.318	3.60321e-30	2	CG8910
CG9328	2.87682e-35	0.394746	0.464	0.303	3.95735e-31	2	CG9328
CG9650	1.48313e-123	0.366983	0.863	0.361	2.0402e-119	2	CG9650
CG9821	9.45133e-117	0.31649	0.999	0.985	1.30012e-112	2	CG9821
chb	6.99744e-21	0.273725	0.517	0.415	9.62568e-17	2	chb
chinmo	1.01758e-113	0.49015	0.987	0.909	1.39978e-109	2	chinmo
chrb1	1.23066e-53	0.294752	0.993	0.93	1.6929e-49	2	chrb
Con	2.21092e-63	0.283496	0.939	0.634	3.04134e-59	2	Con
corto	2.25554e-107	0.548992	0.91	0.729	3.10272e-103	2	corto
cpo	3.62718e-63	0.280721	0.996	0.947	4.98955e-59	2	cpo
CR31451	1.80663e-166	0.514759	1	0.945	2.4852e-162	2	CR31451
CR42862	3.18077e-73	0.37104	0.979	0.932	4.37547e-69	2	CR42862
CR44320	1.17945e-81	0.475192	0.336	0.116	1.62245e-77	2	CR44320
CR44997	1.94446e-33	0.333784	0.283	0.142	2.6748e-29	2	CR44997
CR457581	3.40665e-187	0.906234	0.949	0.706	4.68618e-183	2	CR45758
CR46006	5.83747e-78	0.516389	0.459	0.192	8.03002e-74	2	CR46006
Csk	1.30909e-33	0.295853	0.761	0.649	1.80079e-29	2	Csk
csw	8.21416e-53	0.385815	0.832	0.679	1.12994e-48	2	csw
ct1	0	1.35817	0.957	0.269	0	2	ct
Dgk	1.2196e-22	0.304388	0.384	0.257	1.67768e-18	2	Dgk
Dh44-R1	3.65594e-52	0.381947	0.283	0.11	5.02911e-48	2	Dh44-R1
DIP-beta	0	1.00151	0.819	0.225	0	2	DIP-beta
Dmtn	4.87235e-40	0.367867	0.586	0.412	6.70241e-36	2	Dmtn
dnc	2.64675e-92	0.37185	0.989	0.931	3.64086e-88	2	dnc
dpr10	1.61966e-56	0.346593	0.668	0.402	2.228e-52	2	dpr10
dpr12	1.38832e-44	0.292025	0.892	0.755	1.90978e-40	2	dpr12
dpr151	1.09318e-59	0.431603	0.527	0.293	1.50378e-55	2	dpr15
dpr41	7.74467e-20	0.253914	0.561	0.457	1.06536e-15	2	dpr4
dpr6	2.71162e-58	0.353778	0.807	0.559	3.73011e-54	2	dpr6
dpr9	2.48725e-106	0.511055	0.934	0.654	3.42146e-102	2	dpr9
Drak	5.52431e-25	0.280703	0.62	0.501	7.59925e-21	2	Drak
Drep1	9.28092e-79	0.660069	0.67	0.447	1.27668e-74	2	Drep1
Drep3	7.71539e-92	0.61955	0.391	0.148	1.06133e-87	2	Drep3
drongo	1.6322e-27	0.330804	0.407	0.27	2.24525e-23	2	drongo
Dscam2	2.84621e-80	0.27964	1	0.969	3.91525e-76	2	Dscam2
dtn	3.34897e-29	0.272865	0.778	0.672	4.60684e-25	2	dtn
Dyrk2	2.41923e-24	0.346579	0.648	0.543	3.32789e-20	2	Dyrk2
dysc	2.33137e-114	0.403987	0.996	0.947	3.20703e-110	2	dysc
eag	4.64639e-257	0.993853	0.916	0.49	6.39158e-253	2	eag
east	2.36158e-23	0.281446	0.677	0.584	3.24858e-19	2	east
Efa61	4.93534e-59	0.497424	0.549	0.342	6.78905e-55	2	Efa6
eIF4EHP	6.87797e-50	0.345464	0.9	0.776	9.46133e-46	2	eIF4EHP
Eip93F1	4.28353e-135	0.831154	0.907	0.496	5.89242e-131	2	Eip93F
elav	5.52719e-25	0.253522	0.86	0.795	7.6032e-21	2	elav
elB	7.98743e-26	0.339665	0.549	0.416	1.09875e-21	2	elB
ena	2.51188e-62	0.403804	0.862	0.721	3.45534e-58	2	ena
eys	1.34126e-165	0.714386	0.979	0.653	1.84504e-161	2	eys
Fas3	1.58567e-124	0.467582	0.926	0.516	2.18125e-120	2	Fas3
fax	3.33495e-93	0.270637	1	0.992	4.58756e-89	2	fax
Fife	5.62243e-150	0.6959	0.912	0.571	7.73421e-146	2	Fife
Fili	8.06095e-29	0.300102	0.414	0.256	1.10886e-24	2	Fili
fra	3.81442e-30	0.267486	0.533	0.371	5.24711e-26	2	fra
Frq1	8.50461e-63	0.2879	0.992	0.896	1.16989e-58	2	Frq1
Frq2	1.53436e-123	0.595497	0.932	0.712	2.11067e-119	2	Frq2
fru1	1.66537e-88	0.266465	0.996	0.908	2.29088e-84	2	fru
fwd	1.37281e-19	0.300705	0.557	0.468	1.88844e-15	2	fwd
GABA-B-R3	1.63014e-243	0.97072	0.613	0.176	2.24242e-239	2	GABA-B-R3
Galphao	1.67434e-46	0.304586	0.952	0.864	2.30322e-42	2	Galphao
GFP	2.06264e-152	0.642465	0.985	0.877	2.83736e-148	2	GFP
Gk2	6.26014e-36	0.372785	0.34	0.184	8.61145e-32	2	Gk2
GluClalpha1	1.96706e-225	0.739964	0.992	0.913	2.70588e-221	2	GluClalpha
Gprk2	2.58539e-55	0.339362	0.904	0.791	3.55646e-51	2	Gprk2
Gycbeta100B1	9.4003e-20	0.268957	0.43	0.307	1.29311e-15	2	Gycbeta100B
haf	8.33679e-40	0.291418	0.34	0.17	1.14681e-35	2	haf
ham1	0	0.906448	0.733	0.164	0	2	ham
hbs1	1.72939e-31	0.267308	0.475	0.293	2.37894e-27	2	hbs
Hex-A	1.06567e-130	0.840996	0.838	0.591	1.46594e-126	2	Hex-A
hig	1.03959e-218	1.40251	0.793	0.383	1.43006e-214	2	hig
Hipk	1.62727e-31	0.280217	0.843	0.728	2.23848e-27	2	Hipk
Hr38	5.89548e-204	1.89212	0.84	0.509	8.10982e-200	2	Hr38
Hrb27C	2.6104e-70	0.305046	0.993	0.95	3.59086e-66	2	Hrb27C
Hs3st-A	1.38703e-173	0.702327	0.98	0.767	1.908e-169	2	Hs3st-A
Hsromega	2.24848e-93	0.381058	1	0.98	3.09301e-89	2	Hsromega
hwt	1.32478e-48	0.321494	0.915	0.809	1.82237e-44	2	hwt
inaE	7.56584e-53	0.41678	0.737	0.591	1.04076e-48	2	inaE
jeb1	1.17473e-159	0.71939	0.949	0.737	1.61596e-155	2	jeb
jing	9.68983e-22	0.278757	0.387	0.264	1.33293e-17	2	jing
jvl	6.88515e-19	0.26	0.577	0.496	9.47121e-15	2	jvl
kay	2.14783e-130	0.749679	0.564	0.23	2.95455e-126	2	kay
KCNQ	1.44521e-29	0.285339	0.251	0.122	1.98804e-25	2	KCNQ
kek1	8.44665e-160	0.640807	0.987	0.823	1.16192e-155	2	kek1
kek2	2.42563e-56	0.252545	0.949	0.763	3.3367e-52	2	kek2
kek5	2.21872e-60	0.515177	0.551	0.334	3.05207e-56	2	kek5
klg	8.53182e-192	0.620828	1	0.737	1.17364e-187	2	klg
kune	2.82197e-96	0.563175	0.549	0.26	3.88191e-92	2	kune
l(3)L1231	9.7276e-35	0.332198	0.699	0.58	1.33813e-30	2	l(3)L1231
l(3)neo38	8.99311e-31	0.308223	0.658	0.521	1.23709e-26	2	l(3)neo38
Lar1	2.30228e-183	0.637506	0.983	0.914	3.16702e-179	2	Lar
larp	1.11202e-25	0.307721	0.694	0.607	1.52969e-21	2	larp
lbk1	8.11867e-85	0.549371	0.761	0.521	1.1168e-80	2	lbk
luna	1.20798e-117	0.580815	0.94	0.695	1.6617e-113	2	luna
mAChR-A	4.64096e-44	0.344177	0.819	0.7	6.3841e-40	2	mAChR-A
mamo2	2.53313e-183	0.796851	0.932	0.509	3.48458e-179	2	mamo
mGluR1	2.93251e-54	0.423711	0.573	0.325	4.03396e-50	2	mGluR
Mical1	1.79155e-37	0.396227	0.492	0.329	2.46446e-33	2	Mical
Mid1	6.83476e-103	0.549682	0.934	0.801	9.40189e-99	2	Mid1
Mkp3	1.99022e-205	1.17373	0.871	0.512	2.73774e-201	2	Mkp3
mmd	3.4169e-36	0.258683	0.938	0.863	4.70029e-32	2	mmd
Mmp2	6.68613e-101	0.595026	0.711	0.413	9.19745e-97	2	Mmp2
mnb	3.66719e-65	0.312393	0.963	0.906	5.04459e-61	2	mnb
mspo	3.36644e-139	0.608983	0.953	0.7	4.63088e-135	2	mspo
Myo81F	1.69989e-27	0.269299	0.894	0.831	2.33836e-23	2	Myo81F
nAChRalpha1	6.7426e-77	0.421187	0.945	0.832	9.27513e-73	2	nAChRalpha1
nAChRalpha51	1.84963e-89	0.268805	0.999	0.976	2.54435e-85	2	nAChRalpha5
nej	2.40248e-48	0.375902	0.811	0.681	3.30485e-44	2	nej
Neto	4.51846e-54	0.378275	0.4	0.192	6.2156e-50	2	Neto
NK7.1	1.23376e-120	0.680605	0.75	0.408	1.69716e-116	2	NK7.1
Nlg2	8.581e-77	0.434495	0.904	0.731	1.1804e-72	2	Nlg2
Nlg31	1.97347e-54	0.253675	0.987	0.898	2.7147e-50	2	Nlg3
nmo1	3.12733e-105	0.483057	0.988	0.928	4.30196e-101	2	nmo
Nna1	1.7055e-265	0.708118	0.452	0.081	2.34609e-261	2	Nna1
nrm1	3.01945e-182	0.855582	0.948	0.704	4.15356e-178	2	nrm
numb	1.3602e-20	0.272475	0.537	0.428	1.87109e-16	2	numb
Oct-TyrR1	7.87243e-93	0.489398	0.773	0.445	1.08293e-88	2	Oct-TyrR
orb2	8.58345e-52	0.337115	0.959	0.842	1.18074e-47	2	orb2
para	1.19164e-124	0.36286	0.996	0.979	1.63922e-120	2	para
Pdk1	7.35155e-16	0.292734	0.407	0.316	1.01128e-11	2	Pdk1
pgant21	1.85543e-54	0.419575	0.626	0.391	2.55233e-50	2	pgant2
phyl	1.34108e-98	0.596375	0.773	0.514	1.84479e-94	2	phyl
pico	1.8593e-31	0.255099	0.839	0.768	2.55766e-27	2	pico
plum1	6.84457e-97	0.574474	0.726	0.433	9.4154e-93	2	plum
plx1	3.6386e-75	0.537878	0.649	0.404	5.00526e-71	2	plx
prage1	6.01897e-205	0.788988	0.569	0.165	8.2797e-201	2	prage
Psc	1.65538e-99	0.605801	0.797	0.533	2.27713e-95	2	Psc
Ptp99A	5.76384e-236	0.768773	0.999	0.891	7.92873e-232	2	Ptp99A
puc	1.48986e-223	1.05662	0.836	0.407	2.04945e-219	2	puc
put	1.74207e-26	0.367981	0.48	0.355	2.3964e-22	2	put
px	2.54536e-77	0.463079	0.898	0.727	3.5014e-73	2	px
Pxn1	5.26942e-50	0.263837	0.801	0.527	7.24861e-46	2	Pxn
qvr	3.62918e-52	0.273354	0.971	0.919	4.9923e-48	2	qvr
RapGAP1	1.06127e-121	0.525591	0.967	0.779	1.45989e-117	2	RapGAP1
Rbp9	2.8657e-111	0.420619	0.992	0.925	3.94206e-107	2	Rbp9
rdgA	8.37125e-201	0.795879	0.98	0.64	1.15155e-196	2	rdgA
Rdl	2.75212e-123	0.313088	0.999	0.989	3.78582e-119	2	Rdl
Reph	1.351e-25	0.261903	0.797	0.713	1.85843e-21	2	Reph
Rgk3	7.05449e-58	0.424585	0.6	0.354	9.70415e-54	2	Rgk3
rgn	1.61231e-67	0.452545	0.674	0.395	2.21789e-63	2	rgn
RhoGAP19D	1.52658e-34	0.326506	0.733	0.618	2.09996e-30	2	RhoGAP19D
RhoGAP71E	3.30718e-29	0.265281	0.805	0.713	4.54935e-25	2	RhoGAP71E
Rim	6.23586e-72	0.351694	0.98	0.916	8.57805e-68	2	Rim
rudhira	1.43649e-23	0.254791	0.777	0.713	1.97603e-19	2	rudhira
sano	7.70642e-60	0.306724	0.44	0.202	1.06009e-55	2	sano
scrt	3.37423e-141	0.536057	0.989	0.909	4.64158e-137	2	scrt
scyl1	5.08451e-90	0.494777	0.943	0.786	6.99426e-86	2	scyl
sd	4.53972e-37	0.291771	0.867	0.8	6.24484e-33	2	sd
Sema1a	1.15803e-151	0.501544	0.996	0.949	1.59299e-147	2	Sema1a
Sh	1.68878e-114	0.363869	0.999	0.981	2.32309e-110	2	Sh
Shaw	1.95031e-44	0.39317	0.753	0.626	2.68284e-40	2	Shaw
Shawl1	1.02396e-25	0.273964	0.551	0.397	1.40856e-21	2	Shawl
shn	3.26267e-20	0.285606	0.285	0.174	4.48813e-16	2	shn
sif	8.25211e-30	0.279726	0.769	0.628	1.13516e-25	2	sif
Sik3	2.85186e-27	0.355271	0.354	0.222	3.92302e-23	2	Sik3
Sirt1	2.24976e-76	0.511361	0.769	0.559	3.09477e-72	2	Sirt1
SK	3.58204e-153	0.605974	0.969	0.783	4.92745e-149	2	SK
sky	1.68816e-131	0.602085	0.923	0.686	2.32223e-127	2	sky
sm	7.25534e-71	0.286208	0.996	0.96	9.98044e-67	2	sm
smal1	2.42172e-81	0.438657	0.847	0.596	3.33131e-77	2	smal
Snap25	8.25867e-73	0.364947	0.976	0.89	1.13606e-68	2	Snap25
Snoo	2.1289e-50	0.380807	0.73	0.537	2.92852e-46	2	Snoo
sosie	6.94735e-291	0.65012	0.285	0.026	9.55678e-287	2	sosie
spen	3.73433e-138	0.456275	0.993	0.961	5.13694e-134	2	spen
sty	2.52682e-43	0.650557	0.669	0.509	3.47589e-39	2	sty
Sxl	2.36538e-79	0.413988	0.941	0.838	3.25382e-75	2	Sxl
Syp	1.44983e-95	0.415779	0.992	0.905	1.99438e-91	2	Syp
Syt1	2.95991e-42	0.252605	0.972	0.921	4.07166e-38	2	Syt1
Syx1A	2.98005e-58	0.272727	0.996	0.968	4.09936e-54	2	Syx1A
tai1	1.06172e-57	0.41943	0.805	0.649	1.4605e-53	2	tai
tara	2.88187e-28	0.362414	0.488	0.357	3.96431e-24	2	tara
Teh1	2.16102e-77	0.412739	0.848	0.633	2.9727e-73	2	Teh1
Ten-a	6.97473e-73	0.257034	1	0.967	9.59444e-69	2	Ten-a
Ten-m1	1.42791e-49	0.343477	0.805	0.612	1.96423e-45	2	Ten-m
Tet	2.42428e-173	0.656559	0.987	0.871	3.33484e-169	2	Tet
Toll-6	1.59078e-83	0.478083	0.924	0.703	2.18828e-79	2	Toll-6
toy1	6.63797e-234	0.892744	0.981	0.535	9.13119e-230	2	toy
Trf2	1.46153e-47	0.371859	0.85	0.723	2.01048e-43	2	Trf2
Trim91	3.25158e-264	1.01603	0.924	0.462	4.47288e-260	2	Trim9
trn1	5.58158e-90	0.425563	0.789	0.468	7.67802e-86	2	trn
trv1	2.55902e-93	0.391607	0.997	0.865	3.52019e-89	2	trv
ttv	4.01864e-45	0.362025	0.801	0.665	5.52804e-41	2	ttv
tutl	2.76406e-82	0.377033	0.98	0.886	3.80224e-78	2	tutl
twz	4.93897e-43	0.25554	0.493	0.278	6.79405e-39	2	twz
TyrR	1.52431e-36	0.325931	0.4	0.225	2.09685e-32	2	TyrR
unc-104	1.92217e-23	0.270918	0.798	0.712	2.64413e-19	2	unc-104
VhaAC45	2.13228e-54	0.471099	0.602	0.412	2.93316e-50	2	VhaAC45
w	8.53293e-48	0.344221	0.733	0.51	1.17379e-43	2	w
wake	1.01783e-38	0.351269	0.351	0.182	1.40013e-34	2	wake
wry	5.98708e-60	0.375642	0.839	0.637	8.23582e-56	2	wry
X11Lbeta1	4.10759e-57	0.376887	0.828	0.628	5.6504e-53	2	X11Lbeta
Xrp1	1.79561e-32	0.376825	0.581	0.424	2.47005e-28	2	Xrp1
Ace1	4.66668e-76	0.535658	0.862	0.77	6.41948e-72	3	Ace
Actbeta	1.24884e-10	0.377979	0.444	0.442	1.71791e-06	3	Actbeta
AGO1	1.02219e-42	0.355037	0.885	0.882	1.40612e-38	3	AGO1
ap2	6.78305e-27	0.268498	0.458	0.282	9.33076e-23	3	ap
Atg17	4.51755e-06	0.288655	0.403	0.425	0.0621435	3	Atg17
B52	3.78354e-26	0.299114	0.783	0.82	5.20464e-22	3	B52
beat-Ia	5.09872e-190	0.734248	0.862	0.43	7.01379e-186	3	beat-Ia
beat-Ib	5.2969e-142	0.806085	0.836	0.561	7.28641e-138	3	beat-Ib
beat-Ic	1.78864e-125	0.72112	0.854	0.561	2.46046e-121	3	beat-Ic
beat-IIIc	6.23036e-180	0.849671	0.84	0.44	8.57049e-176	3	beat-IIIc
beat-VI1	9.29509e-83	0.567626	0.806	0.555	1.27863e-78	3	beat-VI
bru11	1.69823e-89	0.79423	0.552	0.302	2.33608e-85	3	bru1
Caper	5.01985e-16	0.28048	0.69	0.755	6.9053e-12	3	Caper
Ccn	1.16829e-40	0.446769	0.563	0.402	1.6071e-36	3	Ccn
cdc14	1.61032e-12	0.256261	0.61	0.661	2.21515e-08	3	cdc14
CenG1A	2.75664e-62	0.665415	0.409	0.211	3.79203e-58	3	CenG1A
cg	1.51624e-33	0.389828	0.706	0.722	2.08574e-29	3	cg
CG103841	3.37735e-32	0.310852	0.674	0.552	4.64588e-28	3	CG10384
CG11000	1.57978e-13	0.271421	0.578	0.567	2.17315e-09	3	CG11000
CG116381	0.00235809	0.256928	0.387	0.428	1	3	CG11638
CG118732	2.65058e-23	0.382922	0.645	0.653	3.64614e-19	3	CG11873
CG12163	0	1.58369	0.925	0.421	0	3	CG12163
CG12594	3.49e-257	1.05987	0.934	0.507	4.80084e-253	3	CG12594
CG129912	1.24791e-13	0.405029	0.512	0.526	1.71663e-09	3	CG12991
CG133001	1.15086e-05	0.327493	0.318	0.304	0.158312	3	CG13300
CG13579	1.70913e-119	0.789648	0.444	0.163	2.35108e-115	3	CG13579
CG135941	1.36681e-100	0.765964	0.677	0.433	1.88018e-96	3	CG13594
CG13739	6.46764e-103	0.858905	0.641	0.353	8.89689e-99	3	CG13739
CG14509	0	1.21268	0.996	0.921	0	3	CG14509
CG15236	1.04849e-74	0.540842	0.745	0.536	1.4423e-70	3	CG15236
CG16791	1.33727e-60	0.474677	0.786	0.73	1.83954e-56	3	CG16791
CG170751	2.65923e-17	0.46336	0.349	0.274	3.65803e-13	3	CG17075
CG17321	0.000958797	0.269021	0.37	0.409	1	3	CG17321
CG17839	2.03688e-158	0.903533	0.673	0.32	2.80193e-154	3	CG17839
CG18265	3.15511e-75	0.679937	0.41	0.189	4.34017e-71	3	CG18265
CG1943	7.1296e-37	0.315959	0.889	0.888	9.80747e-33	3	CG1943
CG2082	2.91904e-165	0.892021	0.769	0.43	4.01543e-161	3	CG2082
CG28651	8.72713e-08	0.335061	0.462	0.486	0.0012005	3	CG2865
CG30158	2.18924e-113	0.793156	0.588	0.287	3.01153e-109	3	CG30158
CG31145	7.62677e-10	0.422395	0.311	0.274	1.04914e-05	3	CG31145
CG32944	9.08221e-17	0.468211	0.272	0.19	1.24935e-12	3	CG32944
CG329821	1.91769e-127	0.804614	0.717	0.415	2.63798e-123	3	CG32982
CG331811	6.86939e-07	0.302689	0.382	0.37	0.00944954	3	CG33181
CG33229	5.71995e-10	0.29115	0.55	0.595	7.86836e-06	3	CG33229
CG33298	0.000111241	0.281622	0.314	0.312	1	3	CG33298
CG341551	1.29464e-38	0.380081	0.563	0.382	1.7809e-34	3	CG34155
CG34347	7.8148e-104	0.747277	0.556	0.271	1.075e-99	3	CG34347
CG34370	6.29917e-09	0.296936	0.338	0.294	8.66514e-05	3	CG34370
CG343711	4.01352e-43	0.470928	0.578	0.408	5.521e-39	3	CG34371
CG344011	7.82998e-19	0.259996	0.79	0.827	1.07709e-14	3	CG34401
CG36551	3.2601e-64	0.632906	0.57	0.362	4.48459e-60	3	CG3655
CG4080	2.3639e-07	0.340156	0.346	0.333	0.00325179	3	CG4080
CG42238	2.58185e-117	0.997602	0.627	0.365	3.5516e-113	3	CG42238
CG423132	1.11468e-192	0.831992	0.979	0.737	1.53335e-188	3	CG42313
CG423391	5.23381e-53	0.568271	0.539	0.348	7.19963e-49	3	CG42339
CG423401	4.26422e-33	0.374596	0.775	0.735	5.86586e-29	3	CG42340
CG42402	1.01295e-99	0.554965	0.878	0.696	1.39341e-95	3	CG42402
CG425401	1.79169e-167	0.598056	0.992	0.929	2.46464e-163	3	CG42540
CG425411	3.32455e-161	0.783107	0.979	0.815	4.57325e-157	3	CG42541
CG42684	3.68669e-16	0.350502	0.575	0.604	5.07142e-12	3	CG42684
CG42747	7.38863e-105	0.728768	0.414	0.154	1.01638e-100	3	CG42747
CG436581	1.49166e-120	0.778266	0.84	0.566	2.05193e-116	3	CG43658
CG43740	2.49917e-134	0.848595	0.571	0.247	3.43787e-130	3	CG43740
CG44153	8.76614e-240	1.05776	0.918	0.544	1.20587e-235	3	CG44153
CG44422	8.18932e-12	0.250924	0.595	0.557	1.12652e-07	3	CG44422
CG4629	7.19396e-19	0.465646	0.31	0.221	9.89601e-15	3	CG4629
CG5059	6.06004e-22	0.429256	0.429	0.351	8.33619e-18	3	CG5059
CG5110	3.47595e-10	0.383573	0.314	0.273	4.78152e-06	3	CG5110
CG5151	6.23089e-25	0.409958	0.635	0.63	8.57122e-21	3	CG5151
CG5890	3.36181e-81	0.635701	0.782	0.658	4.6245e-77	3	CG5890
CG69591	8.10189e-40	0.393526	0.609	0.451	1.1145e-35	3	CG6959
CG9005	6.13496e-06	0.280621	0.397	0.417	0.0843926	3	CG9005
CG96501	0	1.47184	0.975	0.356	0	3	CG9650
CG9932	3.80881e-115	0.78222	0.736	0.462	5.23941e-111	3	CG9932
cic	4.51573e-51	0.453952	0.812	0.797	6.21184e-47	3	cic
Cngl	3.32814e-73	0.312007	0.968	0.851	4.57819e-69	3	Cngl
cnn	4.44675e-05	0.330897	0.353	0.368	0.611695	3	cnn
corto1	2.16492e-23	0.33939	0.72	0.737	2.97806e-19	3	corto
Cow	5.97276e-57	0.414015	0.842	0.72	8.21614e-53	3	Cow
cpo1	1.01573e-147	0.547008	0.992	0.947	1.39724e-143	3	cpo
CR45621	3.65476e-164	0.540146	0.252	0.037	5.02749e-160	3	CR45621
CR457582	1.68448e-107	0.602486	0.873	0.709	2.31717e-103	3	CR45758
dally	2.86361e-46	0.567442	0.5	0.336	3.93918e-42	3	dally
Dg	6.00304e-15	0.388312	0.521	0.534	8.25779e-11	3	Dg
DIP-gamma	1.02228e-27	0.479032	0.434	0.319	1.40624e-23	3	DIP-gamma
dnc1	3.36182e-61	0.409925	0.949	0.933	4.62452e-57	3	dnc
dpr101	4.68479e-241	1.21111	0.814	0.395	6.4444e-237	3	dpr10
dpr51	4.78654e-148	0.888908	0.739	0.413	6.58437e-144	3	dpr5
dpr81	1.56444e-125	0.62962	0.941	0.827	2.15204e-121	3	dpr8
dpr91	4.75662e-36	0.44818	0.745	0.662	6.54321e-32	3	dpr9
Drak1	6.54789e-55	0.587084	0.618	0.502	9.00728e-51	3	Drak
drl1	3.0844e-35	0.488816	0.58	0.469	4.2429e-31	3	drl
Drl-2	8.91108e-90	0.735385	0.597	0.339	1.22581e-85	3	Drl-2
Dscam1	3.1647e-25	0.334444	0.739	0.772	4.35336e-21	3	Dscam1
Dscam21	3.86493e-124	0.431784	1	0.969	5.3166e-120	3	Dscam2
Dscam3	2.336e-16	0.308304	0.471	0.379	3.21341e-12	3	Dscam3
Dsp1	3.64427e-31	0.274646	0.866	0.88	5.01306e-27	3	Dsp1
eas	9.04513e-06	0.30877	0.367	0.377	0.124425	3	eas
eEF51	6.65915e-86	0.328497	0.988	0.977	9.16033e-82	3	eEF5
Eip63F-1	1.0256e-69	0.659311	0.343	0.139	1.41081e-65	3	Eip63F-1
Eip74EF	5.73462e-28	0.492598	0.335	0.217	7.88854e-24	3	Eip74EF
Eip75B	5.22965e-06	0.342491	0.594	0.678	0.0719391	3	Eip75B
erm	0	1.26632	0.529	0.018	0	3	erm
Evi5	7.89817e-85	0.547622	0.867	0.781	1.08647e-80	3	Evi5
eys1	2.13369e-45	0.358051	0.831	0.66	2.9351e-41	3	eys
Fas2	1.87939e-55	0.556063	0.752	0.543	2.58529e-51	3	Fas2
Fili1	5.42922e-14	0.339732	0.336	0.26	7.46843e-10	3	Fili
Flo11	7.71146e-11	0.279741	0.507	0.515	1.06079e-06	3	Flo1
fra1	5.55901e-33	0.525121	0.485	0.374	7.64698e-29	3	fra
fs(1)h	3.93505e-36	0.272122	0.918	0.935	5.41305e-32	3	fs(1)h
ftz-f11	8.95193e-09	0.32766	0.462	0.443	0.000123143	3	ftz-f1
Fur1	2.87779e-27	0.397675	0.547	0.451	3.95868e-23	3	Fur1
Gfrl	2.13656e-120	0.585021	0.929	0.77	2.93905e-116	3	Gfrl
glec1	1.91712e-06	0.285776	0.503	0.536	0.0263719	3	glec
gogo	1.45068e-10	0.36993	0.29	0.233	1.99555e-06	3	gogo
gpp1	1.74589e-66	0.524886	0.792	0.742	2.40165e-62	3	gpp
HDAC4	1.22946e-08	0.304715	0.472	0.501	0.000169125	3	HDAC4
His3.3B	1.89251e-123	0.416697	0.991	0.979	2.60334e-119	3	His3.3B
HmgD1	9.00499e-56	0.536706	0.767	0.714	1.23873e-51	3	HmgD
HmgZ	3.03482e-192	0.718791	0.992	0.96	4.1747e-188	3	HmgZ
HnRNP-K	4.75009e-52	0.519332	0.717	0.667	6.53422e-48	3	HnRNP-K
Hr3	4.60238e-19	0.376613	0.629	0.652	6.33103e-15	3	Hr3
Hr41	1.20679e-193	0.824283	0.973	0.908	1.66006e-189	3	Hr4
Hrb98DE	7.9739e-19	0.29957	0.725	0.757	1.09689e-14	3	Hrb98DE
Hsp67Bc	3.01721e-83	0.355171	1	0.994	4.15047e-79	3	Hsp67Bc
igl1	4.44104e-48	0.292139	0.862	0.691	6.1091e-44	3	igl
JIL-11	1.70697e-18	0.316437	0.584	0.593	2.3481e-14	3	JIL-1
jim	1.09054e-233	0.552175	1	0.971	1.50014e-229	3	jim
Jupiter1	2.55195e-98	0.381572	0.984	0.962	3.51047e-94	3	Jupiter
kek21	2.72385e-104	0.579466	0.922	0.764	3.74692e-100	3	kek2
kek6	3.9991e-27	0.466793	0.495	0.424	5.50116e-23	3	kek6
klg1	2.32888e-228	0.768428	0.999	0.737	3.20361e-224	3	klg
Klp98A	2.57721e-06	0.314485	0.363	0.364	0.0354521	3	Klp98A
KrT95D1	1.97083e-85	0.501554	0.901	0.831	2.71107e-81	3	KrT95D
l(1)G0469	3.11086e-09	0.374354	0.412	0.41	4.27929e-05	3	l(1)G0469
l(3)neo381	2.32691e-47	0.5221	0.631	0.522	3.2009e-43	3	l(3)neo38
lola	6.57586e-34	0.324222	0.898	0.895	9.04575e-30	3	lola
LRP1	3.04557e-39	0.565546	0.475	0.339	4.18949e-35	3	LRP1
Mad	0.000456816	0.26678	0.261	0.248	1	3	Mad
Mapmodulin	8.40977e-08	0.256539	0.572	0.634	0.00115685	3	Mapmodulin
mbc	4.08844e-94	0.693431	0.327	0.106	5.62405e-90	3	mbc
msi	1.7512e-76	0.541131	0.916	0.82	2.40895e-72	3	msi
mub	2.92836e-100	0.390447	0.987	0.935	4.02825e-96	3	mub
Nlg32	2.11715e-146	0.582202	0.981	0.899	2.91235e-142	3	Nlg3
nmo2	8.9097e-44	0.299375	0.953	0.929	1.22562e-39	3	nmo
Nrg	1.08771e-72	0.510551	0.875	0.834	1.49625e-68	3	Nrg
nrm2	1.22317e-57	0.460655	0.796	0.711	1.68259e-53	3	nrm
nrv21	2.07984e-48	0.408399	0.802	0.728	2.86103e-44	3	nrv2
nuf	8.84378e-198	1.07844	0.657	0.272	1.21655e-193	3	nuf
oaf	4.42334e-38	0.599003	0.461	0.323	6.08475e-34	3	oaf
Oatp74D	9.50889e-38	0.457925	0.681	0.655	1.30804e-33	3	Oatp74D
Octbeta2R	1.40636e-30	0.445427	0.693	0.606	1.93459e-26	3	Octbeta2R
Octbeta3R	3.76251e-103	0.777409	0.7	0.468	5.1757e-99	3	Octbeta3R
olf413	2.29597e-52	0.390987	0.822	0.689	3.15833e-48	3	olf413
Oli1	6.46347e-15	0.39478	0.48	0.468	8.89115e-11	3	Oli
otk	1.32178e-14	0.376111	0.477	0.437	1.81824e-10	3	otk
pan	5.28227e-48	0.333641	0.913	0.899	7.26629e-44	3	pan
Pde1c	2.71464e-55	0.605139	0.634	0.462	3.73426e-51	3	Pde1c
phyl1	1.91498e-17	0.394912	0.542	0.524	2.63424e-13	3	phyl
pigs1	7.12564e-65	0.650088	0.559	0.372	9.80203e-61	3	pigs
pnut	1.01267e-09	0.287406	0.584	0.651	1.39303e-05	3	pnut
Prosap	9.27936e-59	0.349928	0.953	0.947	1.27647e-54	3	Prosap
Ptp10D1	4.34485e-67	0.524831	0.765	0.654	5.97677e-63	3	Ptp10D
Ptp99A1	6.31429e-155	0.564029	0.997	0.891	8.68594e-151	3	Ptp99A
puc1	4.4921e-08	0.349511	0.444	0.424	0.000617933	3	puc
Rab18	0.00674389	0.252828	0.331	0.37	1	3	Rab18
rad	8.72219e-106	0.382071	0.885	0.607	1.19983e-101	3	rad
RapGAP11	1.01045e-21	0.291301	0.782	0.787	1.38998e-17	3	RapGAP1
REPTOR	7.78973e-30	0.512519	0.282	0.158	1.07156e-25	3	REPTOR
rho	5.96319e-62	0.669774	0.446	0.241	8.20296e-58	3	rho
rk	1.80913e-143	0.716094	0.319	0.073	2.48864e-139	3	rk
RpL12	1.82985e-96	0.291053	0.999	0.985	2.51715e-92	3	RpL12
scro1	9.07153e-242	1.02678	0.725	0.238	1.24788e-237	3	scro
Sf3b6	3.40592e-19	0.293641	0.643	0.664	4.68518e-15	3	Sf3b6
shakB	2.94185e-82	0.288744	1	0.98	4.04681e-78	3	shakB
shep1	8.04876e-119	0.370749	1	0.989	1.10719e-114	3	shep
siz	0.00771864	0.257373	0.371	0.423	1	3	siz
SK1	2.56874e-142	0.795371	0.924	0.785	3.53355e-138	3	SK
SKIP	9.93807e-128	0.850312	0.784	0.549	1.36708e-123	3	SKIP
SLO2	1.42459e-08	0.297423	0.445	0.427	0.000195967	3	SLO2
Smox	1.68637e-06	0.282631	0.386	0.385	0.0231977	3	Smox
Smr	2.08777e-37	0.408325	0.752	0.767	2.87194e-33	3	Smr
Snoo1	1.56567e-70	0.631248	0.693	0.538	2.15373e-66	3	Snoo
sNPF	1.5062e-15	0.412597	0.29	0.188	2.07192e-11	3	sNPF		Johard, Helena A. D., Lina E. Enell, Elisabeth Gustafsson, Pierre Trifilieff, Jan A. Veenstra, and Dick R. Nässel. “Intrinsic Neurons of Drosophila Mushroom Bodies Express Short Neuropeptide F: Relations to Extrinsic Neurons Expressing Different Neurotransmitters.” The Journal of Comparative Neurology 507, no. 4 (April 1, 2008): 1479–96. https://doi.org/10.1002/cne.21636.
snRNA:7SK1	2.20454e-31	0.362446	0.776	0.784	3.03257e-27	3	snRNA:7SK
Sox102F1	3.54103e-297	1.0779	0.653	0.158	4.87104e-293	3	Sox102F
SoxN	0	1.40516	0.912	0.263	0	3	SoxN
SP1029	4.148e-86	0.55832	0.319	0.101	5.70599e-82	3	SP1029
SPoCk1	7.04879e-128	0.814763	0.756	0.539	9.69632e-124	3	SPoCk
Syn1	3.23614e-211	0.886361	0.941	0.785	4.45164e-207	3	Syn1
Syp1	6.77774e-122	0.51951	0.985	0.906	9.32346e-118	3	Syp
tai2	2.81156e-20	0.327267	0.647	0.656	3.86759e-16	3	tai
Teh11	7.27605e-60	0.520292	0.728	0.638	1.00089e-55	3	Teh1
Ten-a1	5.38328e-258	0.869908	0.993	0.967	7.40524e-254	3	Ten-a
Tina-1	2.98709e-31	0.337115	0.822	0.802	4.10903e-27	3	Tina-1
TkR86C	0	1.2471	0.642	0.147	0	3	TkR86C
toc	3.06978e-59	0.647109	0.586	0.45	4.22279e-55	3	toc
tok	1.39788e-43	0.528885	0.479	0.306	1.92293e-39	3	tok
toy2	3.35134e-167	0.788721	0.933	0.537	4.6101e-163	3	toy
trx	1.93468e-47	0.436735	0.786	0.773	2.66135e-43	3	trx
Tsp39D1	2.66573e-52	0.42295	0.814	0.794	3.66698e-48	3	Tsp39D
Tsp66E	2.69278e-130	0.611174	0.966	0.859	3.70419e-126	3	Tsp66E
Vsx2	2.74867e-141	0.601613	0.256	0.046	3.78108e-137	3	Vsx2
Wdr621	2.31375e-89	0.641439	0.831	0.733	3.18279e-85	3	Wdr62
wge	1.3382e-05	0.337515	0.295	0.282	0.184083	3	wge
wit1	3.92307e-31	0.494817	0.312	0.182	5.39657e-27	3	wit
wry1	1.715e-60	0.481192	0.791	0.64	2.35915e-56	3	wry
14-3-3zeta	0	1.7284	1	0.985	0	4	14-3-3zeta
18w1	1.52214e-15	0.344192	0.268	0.173	2.09385e-11	4	18w
2mit	3.41509e-45	0.505853	0.549	0.37	4.6978e-41	4	2mit
5PtaseI	5.4921e-09	0.263781	0.432	0.409	7.55493e-05	4	5PtaseI
7B2	3.87416e-95	0.387253	0.988	0.926	5.3293e-91	4	7B2
a	4.00975e-183	0.563119	0.262	0.036	5.51581e-179	4	a
ab	0	2.23183	0.997	0.45	0	4	ab
Ac78C	1.76713e-98	0.661433	0.556	0.248	2.43087e-94	4	Ac78C
Aef1	4.36417e-20	0.350928	0.253	0.149	6.00335e-16	4	Aef1
akirin	7.40263e-12	0.259749	0.601	0.609	1.01831e-07	4	akirin
amon	6.68053e-209	1.06273	0.84	0.458	9.18974e-205	4	amon
AP-2sigma	2.9974e-24	0.272359	0.817	0.776	4.12323e-20	4	AP-2sigma
aPKC	1.02838e-60	0.616349	0.613	0.451	1.41465e-56	4	aPKC
Aplip1	6.31211e-08	0.267475	0.517	0.546	0.000868294	4	Aplip1
Appl	6.45101e-258	0.817399	0.997	0.928	8.87401e-254	4	Appl
ari-1	5.97004e-05	0.261189	0.354	0.348	0.821238	4	ari-1
Asator	1.93482e-06	0.250306	0.453	0.461	0.0266154	4	Asator
Atg8a	1.78308e-67	0.392097	0.942	0.868	2.45281e-63	4	Atg8a
babo	5.89022e-06	0.25909	0.322	0.293	0.0810259	4	babo
Bacc1	1.58106e-100	0.345664	0.997	0.993	2.17491e-96	4	Bacc
bic	3.2079e-44	0.417436	0.789	0.719	4.41278e-40	4	bic
bma1	1.25198e-254	1.12422	0.719	0.233	1.72223e-250	4	bma
brp	1.43086e-138	0.582133	0.981	0.917	1.96829e-134	4	brp
bru12	8.87674e-56	0.515734	0.531	0.304	1.22108e-51	4	bru1
bru31	4.02899e-87	0.416258	0.994	0.789	5.54228e-83	4	bru3
btsz	5.72794e-50	0.495378	0.329	0.147	7.87936e-46	4	btsz
bun	5.55763e-126	0.58704	0.959	0.899	7.64508e-122	4	bun
Bx1	2.55106e-212	0.832847	0.943	0.42	3.50924e-208	4	Bx
Ca-alpha1D	1.28382e-20	0.297051	0.68	0.669	1.76602e-16	4	Ca-alpha1D
Ca-beta	4.7976e-14	0.364826	0.496	0.474	6.59958e-10	4	Ca-beta
cact	6.22431e-98	0.798957	0.619	0.364	8.56216e-94	4	cact
Calx1	7.18326e-116	0.69064	0.85	0.622	9.88129e-112	4	Calx
CanB	4.36707e-288	0.896332	0.994	0.93	6.00734e-284	4	CanB
CCKLR-17D32	3.88971e-35	0.388674	0.461	0.284	5.35068e-31	4	CCKLR-17D3
CD98hc	3.04716e-06	0.274971	0.365	0.352	0.0419168	4	CD98hc
cg1	1.00922e-28	0.306567	0.761	0.72	1.38829e-24	4	cg
CG10019	1.10689e-86	0.688805	0.597	0.336	1.52263e-82	4	CG10019
CG10132	5.98692e-19	0.398836	0.419	0.338	8.2356e-15	4	CG10132
CG10543	7.065e-60	0.477298	0.774	0.665	9.71861e-56	4	CG10543
CG10738	6.96643e-308	0.827435	0.394	0.05	9.58303e-304	4	CG10738
CG10947	0	1.40125	0.757	0.151	0	4	CG10947
CG11221	3.14347e-84	0.721751	0.419	0.168	4.32416e-80	4	CG11221
CG11523	9.35998e-09	0.311445	0.256	0.202	0.000128756	4	CG11523
CG11537	5.70913e-56	0.585422	0.416	0.222	7.85348e-52	4	CG11537
CG11768	3.98621e-58	0.55048	0.392	0.181	5.48344e-54	4	CG11768
CG11835	0	1.35521	0.588	0.003	0	4	CG11835
CG12194	2.56995e-39	0.497617	0.44	0.282	3.53522e-35	4	CG12194
CG12531	6.57788e-36	0.462711	0.559	0.439	9.04853e-32	4	CG12531
CG137391	2.41991e-163	0.904783	0.764	0.349	3.32883e-159	4	CG13739
CG13921	7.89177e-81	0.664469	0.479	0.228	1.08559e-76	4	CG13921
CG13954	1.17209e-84	0.692027	0.572	0.313	1.61233e-80	4	CG13954
CG141861	1.26509e-08	0.257311	0.528	0.5	0.000174025	4	CG14186
CG14408	2.49687e-09	0.297471	0.399	0.37	3.4347e-05	4	CG14408
CG14442	5.20274e-16	0.371316	0.498	0.452	7.15689e-12	4	CG14442
CG14478	4.32283e-25	0.337016	0.671	0.638	5.94649e-21	4	CG14478
CG14669	2.22707e-29	0.447572	0.496	0.38	3.06355e-25	4	CG14669
CG147621	7.64597e-19	0.267807	0.651	0.546	1.05178e-14	4	CG14762
CG148531	9.2089e-08	0.293841	0.279	0.226	0.00126678	4	CG14853
CG15309	1.28006e-17	0.368751	0.477	0.42	1.76085e-13	4	CG15309
CG16711	1.41064e-28	0.402792	0.578	0.498	1.94048e-24	4	CG16711
CG17233	6.89592e-11	0.276727	0.259	0.187	9.48604e-07	4	CG17233
CG17272	1.93271e-74	0.647335	0.62	0.416	2.65864e-70	4	CG17272
CG1737	7.06989e-19	0.39512	0.397	0.303	9.72535e-15	4	CG1737
CG17514	3.92677e-53	0.418686	0.814	0.756	5.40166e-49	4	CG17514
CG17765	6.40521e-07	0.275904	0.322	0.287	0.008811	4	CG17765
CG17778	2.12761e-235	1.30239	0.892	0.522	2.92673e-231	4	CG17778
CG182081	4.37114e-87	0.493503	0.902	0.595	6.01294e-83	4	CG18208
CG18812	1.17874e-28	0.395417	0.671	0.62	1.62148e-24	4	CG18812
CG2269	7.04188e-57	0.250867	0.85	0.662	9.68681e-53	4	CG2269
CG30015	5.50591e-20	0.349402	0.282	0.171	7.57393e-16	4	CG30015
CG301161	7.03401e-87	0.590884	0.803	0.567	9.67598e-83	4	CG30116
CG301581	4.83954e-192	0.95274	0.707	0.283	6.65727e-188	4	CG30158
CG30389	9.44084e-23	0.416462	0.493	0.415	1.29868e-18	4	CG30389
CG311401	1.34842e-155	0.734003	0.943	0.787	1.85489e-151	4	CG31140
CG31191	1.39222e-220	0.955602	0.632	0.197	1.91514e-216	4	CG31191
CG318081	9.73044e-64	0.572496	0.373	0.167	1.33852e-59	4	CG31808
CG31997	0	1.67142	0.77	0.105	0	4	CG31997
CG32066	7.32269e-61	0.636617	0.607	0.43	1.00731e-56	4	CG32066
CG32085	4.05926e-31	0.436594	0.293	0.154	5.58392e-27	4	CG32085
CG32204	1.82084e-146	0.900727	0.671	0.308	2.50475e-142	4	CG32204
CG32432	3.36835e-22	0.368577	0.403	0.284	4.63351e-18	4	CG32432
CG324861	9.85689e-12	0.27212	0.55	0.548	1.35591e-07	4	CG32486
CG325061	6.16885e-58	0.529669	0.683	0.495	8.48586e-54	4	CG32506
CG32647	1.87126e-241	1.17864	0.841	0.437	2.57411e-237	4	CG32647
CG32700	0	2.1918	0.983	0.273	0	4	CG32700
CG32758	2.03699e-11	0.349324	0.437	0.4	2.80209e-07	4	CG32758
CG327671	9.58981e-20	0.260849	0.828	0.83	1.31917e-15	4	CG32767
CG33993	2.18792e-168	0.728178	0.377	0.082	3.0097e-164	4	CG33993
CG341141	2.24865e-111	0.64941	0.905	0.706	3.09324e-107	4	CG34114
CG34357	5.13831e-24	0.424668	0.333	0.213	7.06825e-20	4	CG34357
CG343701	4.6891e-13	0.335987	0.371	0.293	6.45033e-09	4	CG34370
CG34402	0	2.53287	0.964	0.028	0	4	CG34402
CG3530	1.31513e-20	0.406435	0.352	0.25	1.80909e-16	4	CG3530
CG42258	2.13458e-08	0.316049	0.441	0.432	0.000293632	4	CG42258
CG42260	1.21695e-161	0.773672	0.962	0.787	1.67403e-157	4	CG42260
CG423241	2.71109e-12	0.321584	0.428	0.368	3.72938e-08	4	CG42324
CG423921	2.09443e-28	0.40766	0.326	0.19	2.8811e-24	4	CG42392
CG424021	2.25134e-302	1.2587	0.984	0.693	3.09694e-298	4	CG42402
CG425412	2.45867e-183	0.834573	0.987	0.815	3.38215e-179	4	CG42541
CG42788	1.65021e-67	0.649752	0.416	0.197	2.27003e-63	4	CG42788
CG4297	7.03109e-20	0.35694	0.282	0.173	9.67196e-16	4	CG4297
CG43324	0	1.8542	0.999	0.667	0	4	CG43324
CG44774	1.85771e-54	0.420246	0.852	0.794	2.55547e-50	4	CG44774
CG45263	1.29148e-141	0.620927	0.981	0.671	1.77656e-137	4	CG45263
CG5065	7.38053e-09	0.257208	0.588	0.614	0.000101526	4	CG5065
CG5830	9.33809e-114	0.907279	0.533	0.233	1.28455e-109	4	CG5830
CG7646	6.83498e-178	0.657415	0.983	0.895	9.40221e-174	4	CG7646
CG7985	2.51248e-31	0.409615	0.467	0.323	3.45617e-27	4	CG7985
CG8188	7.36265e-11	0.294636	0.435	0.398	1.01281e-06	4	CG8188
CG8726	1.26453e-20	0.388557	0.498	0.423	1.73949e-16	4	CG8726
CG89101	3.46708e-53	0.596654	0.517	0.318	4.76931e-49	4	CG8910
CG9368	1.05545e-93	0.683036	0.722	0.484	1.45188e-89	4	CG9368
CG9813	4.96665e-66	0.633792	0.578	0.376	6.83213e-62	4	CG9813
chn	9.82844e-32	0.313243	0.856	0.838	1.352e-27	4	chn
Cip4	5.60572e-44	0.587484	0.555	0.425	7.71123e-40	4	Cip4
Cka	6.90983e-15	0.300419	0.608	0.606	9.50517e-11	4	Cka
ckn	3.71058e-36	0.462293	0.543	0.419	5.10428e-32	4	ckn
Cks85A	7.92881e-12	0.314745	0.284	0.215	1.09069e-07	4	Cks85A
CLIP-190	9.20663e-27	0.321486	0.755	0.755	1.26646e-22	4	CLIP-190
Cngl1	6.97082e-303	1.03982	0.997	0.85	9.58906e-299	4	Cngl
comm	3.59094e-91	0.701536	0.441	0.181	4.93969e-87	4	comm
cora	0	1.48339	0.869	0.325	0	4	cora
Cpr65Ea	0	0.995451	0.422	0.012	0	4	Cpr65Ea
cpx	2.11172e-192	0.587988	0.994	0.97	2.90488e-188	4	cpx
CR43651	6.15021e-21	0.30278	0.266	0.151	8.46023e-17	4	CR43651
CR460061	1.10851e-28	0.384855	0.352	0.198	1.52487e-24	4	CR46006
ctp1	1.5298e-116	0.429922	0.996	0.941	2.10439e-112	4	ctp
cv-c	0	1.42737	0.696	0.046	0	4	cv-c
CycG	9.73147e-118	0.551903	0.961	0.901	1.33866e-113	4	CycG
CycT	1.2178e-17	0.397182	0.443	0.369	1.67521e-13	4	CycT
Cyt-c-p1	9.05174e-64	0.451523	0.911	0.771	1.24516e-59	4	Cyt-c-p
da	6.64463e-08	0.281051	0.457	0.454	0.000914035	4	da
dac	0	1.33597	0.63	0.044	0	4	dac		Kurusu, M., T. Nagao, U. Walldorf, S. Flister, W. J. Gehring, and K. Furukubo-Tokunaga. “Genetic Control of Development of the Mushroom Bodies, the Associative Learning Centers in the Drosophila Brain, by the Eyeless, Twin of Eyeless, and Dachshund Genes.” Proceedings of the National Academy of Sciences of the United States of America 97, no. 5 (February 29, 2000): 2140–44. https://doi.org/10.107…
danr	2.12987e-127	0.704555	0.419	0.128	2.92985e-123	4	danr
Dg1	1.68328e-24	0.366077	0.6	0.531	2.31552e-20	4	Dg
Dif	0	0.848296	0.394	0.027	0	4	Dif
dikar	3.17499e-19	0.368864	0.475	0.398	4.36751e-15	4	dikar
Dl	2.07156e-78	0.529342	0.255	0.07	2.84963e-74	4	Dl
dlg1	3.91074e-169	0.624954	0.971	0.925	5.37961e-165	4	dlg1		Crittenden, J. R., E. M. Skoulakis, K. A. Han, D. Kalderon, and R. L. Davis. “Tripartite Mushroom Body Architecture Revealed by Antigenic Markers.” Learning & Memory (Cold Spring Harbor, N.Y.) 5, no. 1–2 (June 1998): 38–51.
Dmtn1	1.91103e-25	0.427104	0.514	0.416	2.62881e-21	4	Dmtn
dnc2	5.3127e-262	0.877227	0.99	0.931	7.30815e-258	4	dnc
Dop1R1	0	1.62572	0.94	0.441	0	4	Dop1R1
Dop1R2	0	1.17359	0.735	0.188	0	4	Dop1R2		Han, Kyung-An, Neil S Millar, Michael S Grotewiel, and Ronald L Davis. “DAMB, a Novel Dopamine Receptor Expressed Specifically in Drosophila Mushroom Bodies.” Neuron 16, no. 6 (June 1, 1996): 1127–35. https://doi.org/10.1016/S0896-6273(00)80139-7.
Dop2R	1.88679e-177	0.902052	0.886	0.542	2.59546e-173	4	Dop2R
DopEcR	2.83291e-110	0.641186	0.932	0.837	3.89695e-106	4	DopEcR
dpr102	1.15176e-116	0.684331	0.741	0.4	1.58435e-112	4	dpr10
dpr121	2.01673e-111	0.591299	0.923	0.754	2.77421e-107	4	dpr12
dpr82	1.33493e-95	0.498927	0.955	0.827	1.83633e-91	4	dpr8
dpr92	1.11276e-47	0.37894	0.841	0.659	1.53071e-43	4	dpr9
Drep2	7.62322e-70	0.415122	0.923	0.892	1.04865e-65	4	Drep2
Dsp11	1.16985e-40	0.323353	0.888	0.88	1.60925e-36	4	Dsp1
Dyb	1.53915e-51	0.563011	0.608	0.45	2.11725e-47	4	Dyb
dysc1	0	1.04953	0.997	0.947	0	4	dysc
E(Pc)	2.94123e-07	0.252953	0.488	0.496	0.00404596	4	E(Pc)
ed	2.93543e-43	0.344372	0.652	0.438	4.03797e-39	4	ed
Elk	3.46877e-209	0.796562	0.406	0.08	4.77164e-205	4	Elk
enc	1.15472e-11	0.271898	0.616	0.617	1.58843e-07	4	enc
Ent3	1.034e-06	0.29916	0.336	0.312	0.0142237	4	Ent3
ey	0	1.4316	0.7	0.036	0	4	ey		Kurusu, M., T. Nagao, U. Walldorf, S. Flister, W. J. Gehring, and K. Furukubo-Tokunaga. “Genetic Control of Development of the Mushroom Bodies, the Associative Learning Centers in the Drosophila Brain, by the Eyeless, Twin of Eyeless, and Dachshund Genes.” Proceedings of the National Academy of Sciences of the United States of America 97, no. 5 (February 29, 2000): 2140–44. https://doi.org/10.107…
eys2	1.49849e-55	0.336062	0.892	0.658	2.06133e-51	4	eys
Fas21	0	1.4659	0.991	0.534	0	4	Fas2		Crittenden, J. R., E. M. Skoulakis, K. A. Han, D. Kalderon, and R. L. Davis. “Tripartite Mushroom Body Architecture Revealed by Antigenic Markers.” Learning & Memory (Cold Spring Harbor, N.Y.) 5, no. 1–2 (June 1998): 38–51.
fend1	5.00103e-151	0.807967	0.882	0.639	6.87941e-147	4	fend
Fer1HCH	1.75961e-29	0.298628	0.853	0.817	2.42052e-25	4	Fer1HCH
fest	1.67381e-48	0.44736	0.252	0.095	2.30249e-44	4	fest
Flo12	8.72989e-16	0.320725	0.559	0.513	1.20088e-11	4	Flo1
fok	3.61699e-79	0.641167	0.754	0.601	4.97553e-75	4	fok
FoxP	1.45489e-32	0.430995	0.624	0.546	2.00135e-28	4	FoxP
fs(1)h1	1.43858e-39	0.282867	0.945	0.934	1.97891e-35	4	fs(1)h
fwe1	5.79789e-08	0.258682	0.475	0.47	0.000797558	4	fwe
fz	3.64427e-74	0.507759	0.763	0.528	5.01306e-70	4	fz
Galphas	4.21332e-20	0.318649	0.672	0.675	5.79585e-16	4	Galphas
GFP1	3.07881e-236	1.12475	0.962	0.878	4.23521e-232	4	GFP
Gfrl1	3.72109e-219	0.931058	0.967	0.769	5.11873e-215	4	Gfrl
gish	6.8942e-110	0.499997	0.956	0.92	9.48366e-106	4	gish
GlcAT-P	9.88514e-27	0.405945	0.499	0.377	1.3598e-22	4	GlcAT-P
GluRIA1	2.23e-118	0.718782	0.798	0.504	3.06759e-114	4	GluRIA
GluRIB1	1.01465e-201	0.895227	0.964	0.644	1.39575e-197	4	GluRIB
Glut4EF	1.34051e-246	0.981734	0.98	0.847	1.84401e-242	4	Glut4EF
gprs	1.46133e-123	0.790488	0.499	0.194	2.01021e-119	4	gprs
Graf	8.41315e-12	0.314913	0.466	0.437	1.15731e-07	4	Graf
GstD11	0	0.763855	0.301	0.011	0	4	GstD11
Gug	6.26051e-26	0.276374	0.808	0.788	8.61195e-22	4	Gug
Gycalpha99B	3.9647e-13	0.276136	0.581	0.545	5.45385e-09	4	Gycalpha99B
Gycbeta100B2	1.33219e-11	0.303536	0.377	0.31	1.83256e-07	4	Gycbeta100B
HDAC41	1.74817e-109	0.781598	0.725	0.49	2.40479e-105	4	HDAC4
Hr381	4.30437e-149	0.886183	0.862	0.51	5.92109e-145	4	Hr38
Hr51	0	1.11852	0.531	0.044	0	4	Hr51
Imp1	0	1.52357	0.926	0.17	0	4	Imp
Ip259	9.67984e-36	0.360942	0.809	0.759	1.33156e-31	4	Ip259
jdp	0	3.39728	1	0.553	0	4	jdp
jef	7.57404e-30	0.485215	0.459	0.341	1.04188e-25	4	jef
jing1	2.20666e-10	0.310393	0.328	0.267	3.03547e-06	4	jing
kek11	6.02273e-45	0.305361	0.951	0.825	8.28487e-41	4	kek1
kek3	3.58147e-42	0.442295	0.59	0.398	4.92668e-38	4	kek3
Ktl	2.19167e-16	0.257338	0.597	0.526	3.01487e-12	4	Ktl
kuz	1.7496e-19	0.272175	0.796	0.765	2.40675e-15	4	kuz
Lamp1	1.12847e-16	0.255897	0.742	0.741	1.55232e-12	4	Lamp1
lap	3.72056e-13	0.339166	0.508	0.488	5.118e-09	4	lap
larp1	7.4369e-36	0.431112	0.684	0.607	1.02302e-31	4	larp
Lis-1	4.0812e-44	0.50488	0.702	0.635	5.6141e-40	4	Lis-1
Lrch	7.65256e-31	0.448421	0.476	0.351	1.05269e-26	4	Lrch
lute	2.31844e-23	0.368996	0.281	0.162	3.18925e-19	4	lute
lwr	3.36865e-21	0.30499	0.674	0.661	4.63391e-17	4	lwr
LysRS	1.05257e-11	0.373497	0.271	0.204	1.44791e-07	4	LysRS
Magi	2.23611e-32	0.406303	0.288	0.143	3.07599e-28	4	Magi
Mef2	0	1.91592	0.904	0.153	0	4	Mef2		Schulz, R. A., C. Chromey, M. F. Lu, B. Zhao, and E. N. Olson. “Expression of the D-MEF2 Transcription in the Drosophila Brain Suggests a Role in Neuronal Cell Differentiation.” Oncogene 12, no. 8 (April 18, 1996): 1827–31.
metro	3.04608e-58	0.676335	0.426	0.228	4.19019e-54	4	metro
mgl	7.00996e-28	0.363915	0.512	0.374	9.6429e-24	4	mgl
mGluR2	2.67415e-85	0.65736	0.606	0.325	3.67856e-81	4	mGluR
Mical2	1.85229e-35	0.485183	0.475	0.33	2.54801e-31	4	Mical
mim	5.23902e-28	0.502569	0.428	0.313	7.2068e-24	4	mim
mld	1.0054e-32	0.462804	0.278	0.141	1.38303e-28	4	mld
Mnn1	6.32912e-10	0.250308	0.55	0.542	8.70634e-06	4	Mnn1
Mob2	6.52294e-20	0.363047	0.575	0.536	8.97296e-16	4	Mob2
Mp1	7.67073e-49	0.259273	0.91	0.689	1.05519e-44	4	Mp
MRE16	7.10694e-86	0.363301	0.996	0.989	9.77631e-82	4	MRE16
mspo1	4.95652e-133	0.682836	0.933	0.702	6.81818e-129	4	mspo
mtd	1.79859e-52	0.571292	0.639	0.491	2.47414e-48	4	mtd
mub1	0	1.50323	0.999	0.935	0	4	mub		Grams, Rudi, and Günter Korge. “The Mub Gene Encodes a Protein Containing Three KH Domains and Is Expressed in the Mushroom Bodies of Drosophila Melanogaster.” Gene 215, no. 1 (July 17, 1998): 191–201. https://doi.org/10.1016/S0378-1119(98)00251-0.
Nacalpha	1.26947e-49	0.296275	0.974	0.949	1.74628e-45	4	Nacalpha
nAChRalpha61	1.06936e-75	0.383613	0.948	0.712	1.47102e-71	4	nAChRalpha6
nAChRbeta1	6.98163e-55	0.303216	0.955	0.934	9.60392e-51	4	nAChRbeta1
Ncoa6	1.89492e-28	0.398197	0.574	0.478	2.60665e-24	4	Ncoa6
Ndae1	2.96653e-39	0.446904	0.645	0.537	4.08076e-35	4	Ndae1
Ndfip	4.82328e-09	0.298708	0.285	0.23	6.6349e-05	4	Ndfip
Nep1	0	0.88861	0.437	0.042	0	4	Nep1
NetB1	2.31699e-35	0.317259	0.601	0.403	3.18725e-31	4	NetB
neur	2.8908e-161	0.699073	0.329	0.065	3.97659e-157	4	neur
NFAT	1.28121e-81	0.646911	0.594	0.347	1.76243e-77	4	NFAT
NfI	1.66123e-07	0.281488	0.309	0.261	0.00228518	4	NfI
Nlg33	7.87138e-246	0.846674	0.99	0.899	1.08279e-241	4	Nlg3
norpA	1.46477e-96	0.735711	0.763	0.558	2.01494e-92	4	norpA
numb1	8.32603e-21	0.417104	0.502	0.43	1.14533e-16	4	numb
Oamb	1.01335e-22	0.31403	0.309	0.182	1.39397e-18	4	Oamb		Han, K. A., N. S. Millar, and R. L. Davis. “A Novel Octopamine Receptor with Preferential Expression in Drosophila Mushroom Bodies.” The Journal of Neuroscience: The Official Journal of the Society for Neuroscience 18, no. 10 (May 15, 1998): 3650–58.
Octbeta1R	0	1.27967	0.802	0.246	0	4	Octbeta1R
olf4131	9.76198e-289	1.16732	0.975	0.683	1.34286e-284	4	olf413
osp	2.41338e-05	0.255614	0.275	0.244	0.331985	4	osp
pAbp	2.43972e-85	0.394546	0.981	0.947	3.35608e-81	4	pAbp
pcs	1.30876e-10	0.336545	0.448	0.425	1.80034e-06	4	pcs
Pde1c1	2.98942e-214	1.00913	0.868	0.454	4.11225e-210	4	Pde1c
Pdk11	3.79708e-26	0.42554	0.435	0.315	5.22327e-22	4	Pdk1
pgant22	3.84454e-52	0.493213	0.603	0.392	5.28855e-48	4	pgant2
PH4alphaNE1	0	0.820461	0.326	0.004	0	4	PH4alphaNE1
phyl2	2.94106e-11	0.272623	0.549	0.524	4.04573e-07	4	phyl
Pitslre	8.0744e-37	0.429102	0.713	0.656	1.11071e-32	4	Pitslre
Pka-C1	0	2.12168	0.999	0.896	0	4	Pka-C1		Crittenden, J. R., E. M. Skoulakis, K. A. Han, D. Kalderon, and R. L. Davis. “Tripartite Mushroom Body Architecture Revealed by Antigenic Markers.” Learning & Memory (Cold Spring Harbor, N.Y.) 5, no. 1–2 (June 1998): 38–51.
Pka-C3	0	2.37045	0.951	0.043	0	4	Pka-C3
Pka-R1	2.28492e-289	1.25947	0.932	0.504	3.14314e-285	4	Pka-R1
Pka-R2	0	2.55787	0.997	0.732	0	4	Pka-R2		Crittenden, J. R., E. M. Skoulakis, K. A. Han, D. Kalderon, and R. L. Davis. “Tripartite Mushroom Body Architecture Revealed by Antigenic Markers.” Learning & Memory (Cold Spring Harbor, N.Y.) 5, no. 1–2 (June 1998): 38–51.
Pkc53E	0	1.93685	0.987	0.468	0	4	Pkc53E
Pkc98E	3.23523e-137	0.75403	0.872	0.708	4.45038e-133	4	Pkc98E
PMCA	3.6702e-41	0.269964	0.942	0.922	5.04873e-37	4	PMCA
Pp2A-29B	1.80746e-16	0.30975	0.572	0.548	2.48635e-12	4	Pp2A-29B
PPP1R15	2.4545e-08	0.263445	0.278	0.223	0.000337641	4	PPP1R15
prt	0	1.73062	0.761	0.02	0	4	prt		Brooks, Elizabeth S., Christina L. Greer, Rafael Romero-Calderón, Christine N. Serway, Anna Grygoruk, Jasmine M. Haimovitz, Bac T. Nguyen, et al. “A Putative Vesicular Transporter Expressed in Drosophila Mushroom Bodies That Mediates Sexual Behavior May Define a Neurotransmitter System.” Neuron 72, no. 2 (October 20, 2011): 316–29. https://doi.org/10.1016/j.neuron.2011.08.032.
puc2	1.40348e-39	0.463534	0.591	0.418	1.93062e-35	4	puc
Pur-alpha	1.25335e-11	0.299533	0.541	0.533	1.72411e-07	4	Pur-alpha
PVRAP	1.26715e-133	0.745596	0.592	0.234	1.74309e-129	4	PVRAP
Rab14	1.12169e-15	0.25026	0.702	0.71	1.543e-11	4	Rab14
Rab27	2.61853e-160	0.850806	0.416	0.109	3.60205e-156	4	Rab27
Rab31	2.83942e-19	0.326764	0.648	0.622	3.9059e-15	4	Rab3
rad1	0	1.90967	1	0.603	0	4	rad
raw	7.45973e-05	0.26402	0.29	0.268	1	4	raw
Rbp	4.19937e-203	0.932785	0.93	0.746	5.77666e-199	4	Rbp
rdgB	2.38473e-65	0.640487	0.536	0.323	3.28044e-61	4	rdgB
rdgC	1.35144e-88	0.56232	0.287	0.081	1.85905e-84	4	rdgC
Rdh	2.91863e-46	0.439698	0.748	0.686	4.01487e-42	4	Rdh
rdx	1.00488e-15	0.305818	0.614	0.597	1.38231e-11	4	rdx
Rgk1	0	1.55978	0.965	0.532	0	4	Rgk1		Murakami, Satoshi, Maki Minami-Ohtsubo, Ryuichiro Nakato, Katsuhiko Shirahige, and Tetsuya Tabata. “Two Components of Aversive Memory in Drosophila, Anesthesia-Sensitive and Anesthesia-Resistant Memory, Require Distinct Domains within the Rgk1 Small GTPase.” Journal of Neuroscience, April 17, 2017, 3648–16. https://doi.org/10.1523/JNEUROSCI.3648-16.2017.
Rgk31	0	1.61031	0.91	0.342	0	4	Rgk3
Rgl	5.90915e-40	0.514698	0.483	0.324	8.12863e-36	4	Rgl
RhoGDI	9.2936e-15	0.266819	0.636	0.648	1.27843e-10	4	RhoGDI
Ric	4.67249e-108	0.678535	0.844	0.677	6.42748e-104	4	Ric
Rim1	1.1173e-95	0.478727	0.977	0.916	1.53695e-91	4	Rim
ringer	2.25395e-59	0.341613	0.962	0.927	3.10054e-55	4	ringer
robl	5.50657e-13	0.280513	0.566	0.555	7.57483e-09	4	robl
RpL15	1.96683e-73	0.281079	0.994	0.98	2.70558e-69	4	RpL15
RpL36	1.2891e-60	0.254763	0.991	0.972	1.77328e-56	4	RpL36
RpS6	1.6761e-103	0.373803	0.994	0.969	2.30564e-99	4	RpS6
RSG7	1.75185e-45	0.527567	0.645	0.533	2.40985e-41	4	RSG7
rudhira1	3.16584e-17	0.27957	0.71	0.716	4.35493e-13	4	rudhira
rut	0	1.97495	0.983	0.412	0	4	rut		Han, P. L., L. R. Levin, R. R. Reed, and R. L. Davis. “Preferential Expression of the Drosophila Rutabaga Gene in Mushroom Bodies, Neural Centers for Learning in Insects.” Neuron 9, no. 4 (October 1992): 619–27.
scrib	4.44054e-152	0.901442	0.648	0.296	6.10841e-148	4	scrib
scyl2	1.17648e-170	0.760518	0.964	0.786	1.61836e-166	4	scyl
sdt1	1.1927e-113	0.570635	0.949	0.846	1.64067e-109	4	sdt
Shawl2	7.43714e-99	0.707472	0.672	0.392	1.02305e-94	4	Shawl
shi	1.37483e-86	0.470933	0.953	0.896	1.89121e-82	4	shi
sick	4.94767e-31	0.448416	0.429	0.287	6.80602e-27	4	sick
sima	6.02442e-18	0.336	0.604	0.573	8.28719e-14	4	sima
Sin3A	4.5058e-08	0.256723	0.499	0.51	0.000619818	4	Sin3A
Sirt11	2.42065e-11	0.255512	0.582	0.568	3.32985e-07	4	Sirt1
SkpA	3.26094e-42	0.327161	0.916	0.888	4.48575e-38	4	SkpA
slo	5.98653e-74	0.364807	0.987	0.95	8.23507e-70	4	slo
SLO21	7.75812e-19	0.271841	0.531	0.423	1.06721e-14	4	SLO2
Slob	1.57995e-131	0.811069	0.77	0.487	2.17337e-127	4	Slob
Smg5	2.88745e-08	0.284533	0.381	0.346	0.000397198	4	Smg5
Smox1	6.40257e-53	0.561151	0.56	0.378	8.80738e-49	4	Smox
Snap24	2.6016e-31	0.46941	0.46	0.331	3.57876e-27	4	Snap24
sNPF1	0	1.78939	0.945	0.161	0	4	sNPF		Johard, Helena A. D., Lina E. Enell, Elisabeth Gustafsson, Pierre Trifilieff, Jan A. Veenstra, and Dick R. Nässel. “Intrinsic Neurons of Drosophila Mushroom Bodies Express Short Neuropeptide F: Relations to Extrinsic Neurons Expressing Different Neurotransmitters.” The Journal of Comparative Neurology 507, no. 4 (April 1, 2008): 1479–96. https://doi.org/10.1002/cne.21636.
spab1	0	1.31427	0.881	0.304	0	4	spab
SPR	3.75169e-89	0.674732	0.576	0.283	5.16083e-85	4	SPR
Spred	6.69648e-53	0.496218	0.774	0.713	9.21168e-49	4	Spred
SRPK	2.52249e-38	0.512177	0.598	0.511	3.46994e-34	4	SRPK
stx	1.9255e-33	0.45906	0.582	0.484	2.64872e-29	4	stx
sty1	1.39406e-25	0.25226	0.638	0.511	1.91767e-21	4	sty
Su(Tpl)	1.5191e-17	0.346309	0.574	0.55	2.08968e-13	4	Su(Tpl)
Svil	3.64937e-08	0.286907	0.279	0.227	0.000502008	4	Svil
svr	3.52287e-58	0.540501	0.699	0.552	4.84606e-54	4	svr
Swip-1	8.4525e-39	0.512465	0.655	0.6	1.16273e-34	4	Swip-1
syd	2.78255e-14	0.379075	0.403	0.342	3.82768e-10	4	syd
Syt11	5.83009e-31	0.257149	0.946	0.923	8.01987e-27	4	Syt1
tara1	1.47308e-15	0.365102	0.431	0.36	2.02636e-11	4	tara
Ten-a2	6.32527e-126	0.409104	0.999	0.967	8.70104e-122	4	Ten-a
TfIIA-S	2.57487e-21	0.297339	0.725	0.696	3.54199e-17	4	TfIIA-S
tna	3.16082e-44	0.275309	0.969	0.915	4.34802e-40	4	tna
Tob1	1.56109e-49	0.491466	0.75	0.631	2.14744e-45	4	Tob
toc1	4.24391e-13	0.326441	0.491	0.455	5.83792e-09	4	toc
Toll-7	1.53691e-286	1.3102	0.836	0.358	2.11417e-282	4	Toll-7
Tom20	2.43781e-26	0.340972	0.697	0.64	3.35345e-22	4	Tom20
Tomosyn	1.07377e-161	0.835544	0.892	0.681	1.47708e-157	4	Tomosyn
Top3beta	2.48183e-24	0.433199	0.314	0.196	3.414e-20	4	Top3beta
tow	4.44062e-146	0.884692	0.782	0.512	6.10851e-142	4	tow
toy3	4.51323e-55	0.374775	0.865	0.542	6.2084e-51	4	toy		Kurusu, M., T. Nagao, U. Walldorf, S. Flister, W. J. Gehring, and K. Furukubo-Tokunaga. “Genetic Control of Development of the Mushroom Bodies, the Associative Learning Centers in the Drosophila Brain, by the Eyeless, Twin of Eyeless, and Dachshund Genes.” Proceedings of the National Academy of Sciences of the United States of America 97, no. 5 (February 29, 2000): 2140–44. https://doi.org/10.107…
trio	2.18755e-45	0.513373	0.581	0.436	3.0092e-41	4	trio
Trpm	2.93716e-28	0.429594	0.362	0.225	4.04036e-24	4	Trpm
Tsp97E	4.20559e-10	0.27345	0.518	0.506	5.78521e-06	4	Tsp97E
tutl1	3.40332e-45	0.27185	0.972	0.887	4.68161e-41	4	tutl
UbcE2H	7.46574e-17	0.391668	0.39	0.309	1.02699e-12	4	UbcE2H
Ubi-p5E	4.92131e-125	0.414341	0.994	0.979	6.76976e-121	4	Ubi-p5E
unc-1041	2.44444e-36	0.402294	0.76	0.714	3.36257e-32	4	unc-104
Unc-76	2.42366e-86	0.655737	0.76	0.61	3.33399e-82	4	Unc-76
upSET	1.64645e-12	0.287507	0.571	0.579	2.26485e-08	4	upSET
VAChT	1.47864e-50	0.486399	0.735	0.556	2.03401e-46	4	VAChT
Vha16-1	7.24085e-81	0.345992	0.985	0.969	9.96052e-77	4	Vha16-1
Vha36-1	2.0005e-38	0.341693	0.838	0.8	2.75188e-34	4	Vha36-1
vig	9.79038e-22	0.269177	0.795	0.763	1.34676e-17	4	vig
w1	7.06066e-186	1.04869	0.863	0.505	9.71265e-182	4	w
wdb	1.28461e-100	0.556611	0.921	0.84	1.76711e-96	4	wdb
wry2	1.3084e-34	0.279844	0.798	0.64	1.79983e-30	4	wry
wts	3.62895e-19	0.367855	0.335	0.231	4.99198e-15	4	wts
zfh21	2.97987e-85	0.594843	0.317	0.093	4.09911e-81	4	zfh2
Act42A1	2.68297e-29	0.278919	0.977	0.861	3.6907e-25	5	Act42A
Act5C	9.133e-65	0.378489	0.993	0.905	1.25634e-60	5	Act5C
AdSS	1.24593e-24	0.255892	0.716	0.477	1.7139e-20	5	AdSS
alphaTub84B	2.86144e-34	0.278385	0.998	0.979	3.9362e-30	5	alphaTub84B
Antp	0	1.70878	0.7	0.044	0	5	Antp
Atox12	1.78322e-32	0.270495	0.982	0.937	2.453e-28	5	Atox1
ATPsynCF61	2.33644e-35	0.250061	0.984	0.92	3.21401e-31	5	ATPsynCF6
ATPsynF1	6.02856e-43	0.28095	0.993	0.944	8.29288e-39	5	ATPsynF
betaTub56D1	2.55042e-54	0.402273	0.995	0.919	3.50836e-50	5	betaTub56D
Blimp-11	5.06487e-65	0.340916	0.634	0.287	6.96724e-61	5	Blimp-1
bol	4.0471e-22	0.252787	0.957	0.824	5.56719e-18	5	bol
br	7.84866e-16	0.610405	0.321	0.194	1.07966e-11	5	br
Bx2	1.5899e-35	0.351934	0.693	0.432	2.18707e-31	5	Bx
CanB21	3.09207e-79	0.46463	0.984	0.889	4.25345e-75	5	CanB2
Cbp53E1	5.21486e-32	0.569347	0.74	0.464	7.17357e-28	5	Cbp53E
CG11030	2.80559e-32	0.323308	0.688	0.412	3.85936e-28	5	CG11030
CG112671	4.43012e-31	0.314228	0.923	0.696	6.09408e-27	5	CG11267
CG11319	4.87333e-36	0.361727	0.671	0.392	6.70375e-32	5	CG11319
CG131081	3.39814e-39	0.309404	0.912	0.602	4.67448e-35	5	CG13108
CG14015	4.01652e-25	0.299461	0.756	0.497	5.52512e-21	5	CG14015
CG17193	2.38201e-46	0.304967	0.251	0.08	3.27669e-42	5	CG17193
CG177161	5.629e-86	0.753082	0.898	0.598	7.74326e-82	5	CG17716
CG31814	1.37193e-21	0.253791	0.558	0.353	1.88723e-17	5	CG31814
CG319971	2.98211e-33	0.320343	0.307	0.125	4.10219e-29	5	CG31997
CG3961	3.05602e-46	0.328474	0.641	0.333	4.20387e-42	5	CG3961
CG423421	4.52201e-34	0.402783	0.81	0.531	6.22048e-30	5	CG42342
CG42394	1.03723e-40	0.31331	0.654	0.352	1.42682e-36	5	CG42394
CG42613	1.81834e-15	0.268992	0.939	0.779	2.50131e-11	5	CG42613
CG437781	3.624e-29	0.320224	0.573	0.327	4.98517e-25	5	CG43778
CG46301	2.32119e-39	0.4593	0.774	0.518	3.19303e-35	5	CG46301
CG76301	3.21732e-42	0.280535	0.991	0.933	4.42574e-38	5	CG7630
CG99191	8.56391e-49	0.32472	0.973	0.811	1.17805e-44	5	CG9919
chrb2	1.26575e-14	0.285906	0.989	0.931	1.74117e-10	5	chrb
COX7C1	3.0568e-36	0.253773	0.993	0.929	4.20493e-32	5	COX7C
cpx1	8.83278e-44	0.299898	0.995	0.97	1.21504e-39	5	cpx
CR44024	2.85987e-72	0.351439	0.56	0.221	3.93403e-68	5	CR44024
CR44978	1.0731e-27	0.395955	0.465	0.255	1.47615e-23	5	CR44978
cype1	5.22939e-51	0.308998	1	0.957	7.19355e-47	5	cype
dati	6.19028e-143	0.692857	0.855	0.333	8.51534e-139	5	dati
DIP-delta1	1.9189e-59	0.393054	0.639	0.306	2.63963e-55	5	DIP-delta
dpr201	2.51087e-19	0.308972	0.483	0.303	3.45395e-15	5	dpr20
Eno1	2.72366e-30	0.26577	0.925	0.663	3.74666e-26	5	Eno
fabp1	8.21744e-98	0.583166	0.98	0.802	1.13039e-93	5	fabp
Fie	1.0016e-42	0.294102	0.668	0.358	1.3778e-38	5	Fie
fru2	0.00435434	0.267939	0.964	0.91	1	5	fru
Gapdh11	3.50127e-33	0.281682	0.781	0.496	4.81635e-29	5	Gapdh1
grn	0	1.22341	0.443	0.027	0	5	grn
GstZ2	1.16392e-119	0.761963	0.907	0.485	1.60109e-115	5	GstZ2
Hasp1	3.38761e-50	0.383734	0.926	0.607	4.66e-46	5	Hasp
His4r	5.67469e-95	0.279915	1	0.998	7.8061e-91	5	His4r
Hk	7.30898e-65	0.413232	0.986	0.822	1.00542e-60	5	Hk
Hsp67Ba1	6.28438e-34	0.325986	0.892	0.629	8.64479e-30	5	Hsp67Ba
hth1	1.28898e-229	1.33915	0.966	0.559	1.77312e-225	5	hth
igl2	3.42081e-61	0.595982	0.964	0.69	4.70566e-57	5	igl
Lim11	1.60445e-138	0.662036	0.549	0.147	2.20708e-134	5	Lim1
Lmpt	7.5706e-144	0.654254	0.517	0.136	1.04141e-139	5	Lmpt
LpR1	3.06928e-45	0.316812	0.645	0.34	4.2221e-41	5	LpR1
Mpcp2	8.17376e-30	0.262504	0.95	0.791	1.12438e-25	5	Mpcp2
Msp3001	3.03099e-35	0.287224	0.989	0.861	4.16943e-31	5	Msp300
nAChRalpha3	6.6239e-38	0.357152	0.803	0.488	9.11184e-34	5	nAChRalpha3
nAChRalpha7	5.43035e-33	0.416392	0.93	0.77	7.46999e-29	5	nAChRalpha7
ND-13A1	4.23631e-47	0.335488	0.925	0.638	5.82747e-43	5	ND-13A
nemy	4.58323e-71	0.420017	0.776	0.395	6.3047e-67	5	nemy
noe	5.7284e-40	0.268866	1	1	7.87998e-36	5	noe
prim1	4.98555e-22	0.374617	0.864	0.614	6.85813e-18	5	prim
pros	1.8281e-77	1.018	0.959	0.767	2.51474e-73	5	pros
Pvf3	6.22145e-23	0.380114	0.865	0.668	8.55822e-19	5	Pvf3
PVRAP1	3.06678e-32	0.323456	0.47	0.241	4.21866e-28	5	PVRAP
RFeSP1	2.74066e-26	0.250074	0.98	0.859	3.77005e-22	5	RFeSP
robo2	1.84051e-36	0.270354	0.361	0.155	2.53181e-32	5	robo2
rpr	1.11058e-37	0.278672	0.334	0.136	1.52771e-33	5	rpr
RpS13	1.39111e-34	0.2549	0.969	0.866	1.91361e-30	5	RpS13
SdhC1	7.55147e-27	0.259602	0.878	0.614	1.03878e-22	5	SdhC
Sep1	1.27415e-41	0.26958	0.718	0.393	1.75273e-37	5	Sep1
sesB1	8.96166e-37	0.281073	0.989	0.932	1.23277e-32	5	sesB
Shab	2.53047e-56	0.406851	0.921	0.594	3.48091e-52	5	Shab
skl	1.20123e-37	0.293809	0.348	0.144	1.65241e-33	5	skl
tio	1.11633e-119	0.322617	0.352	0.075	1.53563e-115	5	tio
TM4SF1	4.00078e-49	0.365509	0.91	0.587	5.50348e-45	5	TM4SF
Toll-61	1.35553e-24	0.392331	0.869	0.707	1.86467e-20	5	Toll-6
Tpi1	1.18049e-50	0.342189	0.808	0.449	1.62389e-46	5	Tpi
tsh1	0	1.23307	0.779	0.082	0	5	tsh
tsr1	2.33278e-36	0.335768	0.973	0.812	3.20897e-32	5	tsr
twz1	3.34439e-23	0.711572	0.472	0.281	4.60054e-19	5	twz
TyrR1	4.94121e-45	0.305671	0.499	0.224	6.79712e-41	5	TyrR
unc-4	0	0.404325	0.311	0.016	0	5	unc-4
UQCR-Q1	1.13314e-39	0.315565	0.978	0.86	1.55875e-35	5	UQCR-Q
vvl	5.67614e-54	0.486619	0.39	0.147	7.8081e-50	5	vvl
2mit1	1.68983e-11	0.386799	0.434	0.375	2.32453e-07	6	2mit
5-HT1A1	2.68914e-112	0.812498	0.882	0.531	3.69918e-108	6	5-HT1A
Ac13E1	1.00721e-39	0.520015	0.295	0.124	1.38552e-35	6	Ac13E
Ace2	4.66239e-20	0.277657	0.828	0.773	6.41359e-16	6	Ace
Actbeta1	5.14434e-08	0.298784	0.45	0.442	0.000707655	6	Actbeta
AGO11	1.09827e-32	0.346172	0.901	0.882	1.51078e-28	6	AGO1
Akap2001	4.37471e-14	0.313779	0.644	0.633	6.01785e-10	6	Akap200
ap3	1.71405e-183	0.951594	0.785	0.273	2.35784e-179	6	ap
AstC-R12	7.25559e-08	0.25248	0.307	0.233	0.000998079	6	AstC-R1
awd1	7.32145e-33	0.344529	0.906	0.879	1.00714e-28	6	awd
beat-IIa	5.13193e-46	0.517476	0.734	0.529	7.05948e-42	6	beat-IIa
beat-IIb	2.8509e-48	0.633401	0.528	0.323	3.9217e-44	6	beat-IIb
beat-IIIc1	9.95937e-234	1.22359	0.926	0.442	1.37001e-229	6	beat-IIIc
brp1	6.86217e-22	0.269482	0.924	0.919	9.4396e-18	6	brp
bru32	2.36645e-137	0.698554	0.984	0.791	3.25529e-133	6	bru3
Ccn1	1.46984e-231	1.3653	0.868	0.394	2.02191e-227	6	Ccn
CCT5	0.00371531	0.269195	0.275	0.271	1	6	CCT5
cdc141	3.3025e-10	0.263413	0.618	0.66	4.54291e-06	6	cdc14
cdi1	1.5782e-22	0.33009	0.754	0.751	2.17098e-18	6	cdi
cg2	1.37179e-13	0.267488	0.698	0.723	1.88703e-09	6	cg
CG103842	2.36292e-33	0.421724	0.714	0.552	3.25044e-29	6	CG10384
CG110001	2.90404e-31	0.458627	0.673	0.564	3.9948e-27	6	CG11000
CG11357	2.92146e-05	0.286867	0.271	0.236	0.401876	6	CG11357
CG113601	4.16482e-23	0.291477	0.846	0.858	5.72913e-19	6	CG11360
CG116382	4.22629e-06	0.272184	0.43	0.426	0.0581368	6	CG11638
CG118733	2.77229e-23	0.361472	0.685	0.652	3.81357e-19	6	CG11873
CG121631	1.913e-207	1.14524	0.872	0.429	2.63152e-203	6	CG12163
CG13585	9.83565e-17	0.307158	0.691	0.704	1.35299e-12	6	CG13585
CG136851	8.08831e-100	0.82804	0.769	0.524	1.11263e-95	6	CG13685
CG139201	2.75067e-84	0.484984	0.98	0.953	3.78382e-80	6	CG13920
CG140242	2.06459e-30	0.42546	0.667	0.556	2.84005e-26	6	CG14024
CG148831	1.03845e-06	0.274292	0.342	0.304	0.014285	6	CG14883
CG14995	2.82172e-32	0.607124	0.407	0.253	3.88156e-28	6	CG14995
CG16881	1.83844e-17	0.322702	0.461	0.327	2.52896e-13	6	CG1688
CG17065	4.09725e-06	0.264662	0.544	0.602	0.0563618	6	CG17065
CG172701	7.19283e-29	0.337361	0.821	0.763	9.89446e-25	6	CG17270
CG19431	9.91643e-35	0.311081	0.915	0.887	1.3641e-30	6	CG1943
CG20821	1.10474e-53	0.541835	0.665	0.437	1.51969e-49	6	CG2082
CG301721	2.02359e-54	0.31169	0.998	0.969	2.78365e-50	6	CG30172
CG31323	9.79189e-39	0.587723	0.403	0.221	1.34697e-34	6	CG31323
CG331431	2.5229e-60	0.526184	0.861	0.737	3.4705e-56	6	CG33143
CG336391	6.59071e-28	0.252672	0.586	0.4	9.06618e-24	6	CG33639
CG341131	8.00923e-92	0.552303	0.964	0.801	1.10175e-87	6	CG34113
CG341142	1.19452e-35	0.563415	0.774	0.712	1.64319e-31	6	CG34114
CG341361	1.28987e-43	0.428351	0.725	0.558	1.77434e-39	6	CG34136
CG341552	8.05922e-69	0.531656	0.682	0.38	1.10863e-64	6	CG34155
CG343471	2.73052e-70	0.716996	0.546	0.274	3.75611e-66	6	CG34347
CG343531	3.01577e-211	1.10509	0.973	0.667	4.14849e-207	6	CG34353
CG343542	6.89636e-80	0.609855	0.89	0.662	9.48663e-76	6	CG34354
CG343702	5.49804e-51	0.615663	0.505	0.289	7.56311e-47	6	CG34370
CG343712	5.58853e-149	1.05031	0.792	0.403	7.68759e-145	6	CG34371
CG343831	6.69089e-23	0.267076	0.817	0.751	9.20399e-19	6	CG34383
CG344012	6.07241e-22	0.326719	0.812	0.826	8.35321e-18	6	CG34401
CG423133	2.7054e-71	0.547592	0.944	0.741	3.72155e-67	6	CG42313
CG423242	2.26669e-23	0.511122	0.474	0.367	3.11806e-19	6	CG42324
CG423392	8.48872e-53	0.599689	0.582	0.349	1.16771e-48	6	CG42339
CG423402	1.53926e-43	0.434556	0.852	0.733	2.1174e-39	6	CG42340
CG423891	1.92302e-48	0.477594	0.808	0.681	2.6453e-44	6	CG42389
CG424022	2.12142e-72	0.591872	0.868	0.699	2.91823e-68	6	CG42402
CG424921	3.46825e-90	0.405465	0.995	0.984	4.77093e-86	6	CG42492
CG425413	2.2294e-56	0.440181	0.944	0.818	3.06677e-52	6	CG42541
CG437401	9.24858e-206	1.1515	0.716	0.246	1.27224e-201	6	CG43740
CG43902	2.08137e-123	0.73897	0.917	0.567	2.86313e-119	6	CG43902
CG441531	2.0172e-235	1.22302	0.966	0.547	2.77485e-231	6	CG44153
CG444221	1.26873e-36	0.468353	0.723	0.553	1.74527e-32	6	CG44422
CG4467	1.57197e-16	0.311991	0.649	0.638	2.1624e-12	6	CG4467
CG46291	3.9938e-07	0.317997	0.275	0.223	0.00549387	6	CG4629
CG51511	8.87473e-30	0.455059	0.693	0.629	1.22081e-25	6	CG5151
CG5934	0.00015266	0.286936	0.427	0.46	1	6	CG5934
CG60242	1.48598e-23	0.345268	0.741	0.673	2.04411e-19	6	CG6024
CG83001	9.19323e-10	0.355559	0.371	0.32	1.26462e-05	6	CG8300
CG85001	0.000103447	0.275018	0.463	0.495	1	6	CG8500
CG91091	0	1.33487	0.734	0.103	0	6	CG9109
CG96502	5.96729e-197	1.05851	0.913	0.365	8.2086e-193	6	CG9650
CG9662	0.000200491	0.264571	0.362	0.369	1	6	CG9662
CG9705	4.75273e-05	0.302909	0.3	0.279	0.653786	6	CG9705
CG99321	4.35039e-61	0.595359	0.709	0.466	5.98439e-57	6	CG9932
chinmo1	1.00527e-29	0.288983	0.944	0.911	1.38285e-25	6	chinmo
cib	7.39876e-15	0.352497	0.617	0.616	1.01777e-10	6	cib
Cngl2	4.39128e-87	0.454252	0.982	0.852	6.04064e-83	6	Cngl
comm1	7.46062e-08	0.328039	0.251	0.189	0.00102628	6	comm
Con1	2.71896e-132	0.689087	0.976	0.636	3.7402e-128	6	Con
cpo2	5.26249e-62	0.375411	0.987	0.947	7.23908e-58	6	cpo
CR457583	4.5821e-29	0.342265	0.792	0.714	6.30313e-25	6	CR45758
CR460062	1.01718e-83	0.802831	0.486	0.194	1.39923e-79	6	CR46006
Csk1	1.66666e-11	0.298403	0.631	0.655	2.29266e-07	6	Csk
ct2	4.87953e-132	0.800662	0.747	0.284	6.71228e-128	6	ct
Df31	3.00741e-98	0.344575	0.995	0.988	4.13699e-94	6	Df31
Dgk1	2.84514e-11	0.377427	0.336	0.26	3.91377e-07	6	Dgk
dpr103	1.13703e-48	0.527803	0.633	0.406	1.56411e-44	6	dpr10
dpr122	2.78719e-188	0.989429	0.964	0.754	3.83406e-184	6	dpr12
dpr131	8.04723e-90	0.642401	0.926	0.673	1.10698e-85	6	dpr13
dpr16	2.23597e-18	0.461332	0.342	0.227	3.0758e-14	6	dpr16
dpr17	1.48897e-148	0.965512	0.797	0.386	2.04823e-144	6	dpr17
dpr181	8.73785e-88	0.838194	0.579	0.283	1.20198e-83	6	dpr18
dpr2	9.26994e-103	0.852978	0.662	0.345	1.27517e-98	6	dpr2
dpr3	6.15952e-66	0.677208	0.595	0.331	8.47304e-62	6	dpr3
dpr52	2.08039e-108	0.8142	0.754	0.416	2.86179e-104	6	dpr5
Drak2	2.09921e-10	0.296309	0.523	0.506	2.88767e-06	6	Drak
drl2	6.56667e-147	0.956068	0.823	0.462	9.03312e-143	6	drl
Dsp12	2.90168e-23	0.27581	0.87	0.88	3.99155e-19	6	Dsp1
Dyb1	2.1612e-44	0.622989	0.6	0.452	2.97294e-40	6	Dyb
E2f1	2.17121e-05	0.266235	0.47	0.499	0.298671	6	E2f1
Eaat2	4.47455e-14	0.418157	0.481	0.445	6.15519e-10	6	Eaat2
eEF52	5.06058e-65	0.305383	0.987	0.977	6.96133e-61	6	eEF5
eIF4E1	1.9419e-25	0.252498	0.89	0.864	2.67128e-21	6	eIF4E1
elB1	1.76582e-69	0.795136	0.638	0.414	2.42906e-65	6	elB
emc	1.56864e-17	0.290121	0.774	0.717	2.15783e-13	6	emc
fid	1.63054e-40	0.600915	0.367	0.187	2.24297e-36	6	fid
Flo13	1.18681e-16	0.399515	0.555	0.513	1.63258e-12	6	Flo1
flw	1.24931e-10	0.32601	0.535	0.525	1.71855e-06	6	flw
fra2	1.32004e-117	0.958485	0.696	0.368	1.81585e-113	6	fra
Frq11	1.02731e-64	0.397339	0.982	0.898	1.41317e-60	6	Frq1
Frq21	6.02255e-54	0.508087	0.837	0.717	8.28462e-50	6	Frq2
fs(1)h2	1.72559e-25	0.27202	0.935	0.934	2.37373e-21	6	fs(1)h
ftz-f12	1.15009e-26	0.595481	0.562	0.44	1.58207e-22	6	ftz-f1
fz1	3.04218e-76	0.698705	0.772	0.53	4.18482e-72	6	fz
GFP2	6.37437e-31	0.293551	0.944	0.879	8.76858e-27	6	GFP
Gfrl2	8.41869e-290	1.40896	0.998	0.769	1.15808e-285	6	Gfrl
GlcAT-P1	9.87907e-68	0.781767	0.604	0.375	1.35897e-63	6	GlcAT-P
GlcAT-S	1.17153e-25	0.544327	0.445	0.329	1.61156e-21	6	GlcAT-S
GluClalpha2	2.05729e-26	0.261441	0.951	0.915	2.83e-22	6	GluClalpha
gpp2	2.61915e-32	0.423704	0.759	0.744	3.6029e-28	6	gpp
Gycbeta100B3	2.25882e-42	0.634072	0.492	0.307	3.10723e-38	6	Gycbeta100B
hbs2	2.81527e-194	1.14371	0.743	0.287	3.87268e-190	6	hbs
heph	8.18458e-109	0.590002	0.953	0.723	1.12587e-104	6	heph
Hipk1	2.52683e-13	0.290909	0.716	0.734	3.47591e-09	6	Hipk
HmgD2	1.05579e-62	0.620433	0.825	0.713	1.45235e-58	6	HmgD
HmgZ1	3.31193e-71	0.454932	0.987	0.96	4.55589e-67	6	HmgZ
Hr42	1.81627e-56	0.406353	0.948	0.91	2.49846e-52	6	Hr4
Hs3st-A1	6.21591e-129	0.855367	0.953	0.771	8.5506e-125	6	Hs3st-A
Hsp231	4.70249e-38	0.358814	0.917	0.741	6.46874e-34	6	Hsp23
Hsp271	3.86397e-08	0.312061	0.602	0.593	0.000531527	6	Hsp27
jeb2	1.09375e-116	0.839826	0.913	0.741	1.50457e-112	6	jeb
Jupiter2	2.42033e-171	0.673124	0.987	0.962	3.3294e-167	6	Jupiter
kek31	9.03777e-180	1.11129	0.821	0.392	1.24324e-175	6	kek3
Klp98A1	5.31331e-10	0.341728	0.407	0.363	7.30899e-06	6	Klp98A
KrT95D2	1.15369e-146	0.966011	0.951	0.83	1.58701e-142	6	KrT95D
l(3)neo382	2.23717e-05	0.256899	0.506	0.527	0.307744	6	l(3)neo38
Liprin-gamma	1.15088e-57	0.548799	0.852	0.762	1.58316e-53	6	Liprin-gamma
LRR1	0.000641002	0.260585	0.432	0.465	1	6	LRR
luna1	7.24347e-53	0.492152	0.879	0.7	9.96412e-49	6	luna
mago1	0.000186569	0.254143	0.423	0.455	1	6	mago
mbl1	1.16573e-67	0.379316	0.928	0.63	1.60358e-63	6	mbl
Mmp21	9.21558e-17	0.373195	0.515	0.423	1.2677e-12	6	Mmp2
mnb1	3.01212e-19	0.253493	0.906	0.908	4.14347e-15	6	mnb
Mp2	1.23569e-68	0.591746	0.895	0.691	1.69981e-64	6	Mp
msi1	4.75217e-37	0.356222	0.892	0.822	6.53709e-33	6	msi
mub2	9.21085e-68	0.35275	0.982	0.936	1.26704e-63	6	mub
nAChRalpha52	6.25486e-153	0.576303	1	0.977	8.60418e-149	6	nAChRalpha5
nAChRbeta11	2.72133e-40	0.296098	0.96	0.934	3.74346e-36	6	nAChRbeta1
NK7.11	6.90197e-22	0.442639	0.535	0.419	9.49436e-18	6	NK7.1
noc	2.0262e-70	0.808285	0.6	0.364	2.78724e-66	6	noc
nonA	1.48443e-07	0.256388	0.57	0.608	0.00204199	6	nonA
Nrg1	2.32439e-26	0.299489	0.85	0.835	3.19742e-22	6	Nrg
nrm3	1.31401e-27	0.330656	0.787	0.712	1.80756e-23	6	nrm
nrv22	8.39177e-141	0.824781	0.929	0.725	1.15437e-136	6	nrv2
Octbeta2R1	3.67207e-174	1.01508	0.933	0.599	5.0513e-170	6	Octbeta2R
olf4132	5.38843e-31	0.346443	0.803	0.691	7.41233e-27	6	olf413
Oli2	1.27016e-10	0.353978	0.485	0.468	1.74724e-06	6	Oli
otk1	9.35674e-115	0.89715	0.74	0.429	1.28711e-110	6	otk
Pep	9.24593e-22	0.285602	0.821	0.831	1.27187e-17	6	Pep
pgant5	0.000687433	0.309114	0.286	0.274	1	6	pgant5
phyl3	2.73313e-16	0.4155	0.564	0.523	3.75969e-12	6	phyl
pigs2	1.52377e-51	0.621551	0.577	0.373	2.0961e-47	6	pigs
PKD1	2.91151e-33	0.546447	0.363	0.203	4.00508e-29	6	PKD
plx2	1.09194e-07	0.320803	0.43	0.414	0.00150208	6	plx
prominin-like	2.48609e-10	0.305749	0.633	0.665	3.41987e-06	6	prominin-like
Prosalpha51	1.46698e-05	0.272279	0.472	0.5	0.201797	6	Prosalpha5
Prosap1	1.00704e-144	0.682621	0.984	0.946	1.38528e-140	6	Prosap
Pvf31	1.22979e-116	0.76283	0.942	0.665	1.6917e-112	6	Pvf3
RapGAP12	1.04689e-19	0.287983	0.821	0.786	1.44011e-15	6	RapGAP1
Rbfox1	2.01858e-149	0.580398	0.998	0.971	2.77675e-145	6	Rbfox1
rdgA1	1.67813e-24	0.256748	0.819	0.65	2.30844e-20	6	rdgA
RpLP01	4.35367e-39	0.314057	0.969	0.955	5.98891e-35	6	RpLP0
scro2	4.61555e-165	0.946704	0.72	0.244	6.34915e-161	6	scro
Sec61beta	2.71641e-17	0.275707	0.814	0.805	3.73669e-13	6	Sec61beta
Set	1.64077e-08	0.32175	0.519	0.529	0.000225705	6	Set
shakB1	1.10438e-182	0.649947	1	0.98	1.51919e-178	6	shakB
Shawl3	2.48484e-12	0.325428	0.472	0.401	3.41815e-08	6	Shawl
SKIP1	1.15076e-42	0.507604	0.709	0.554	1.58298e-38	6	SKIP
sky1	6.60617e-87	0.766652	0.839	0.692	9.08744e-83	6	sky
SLO22	1.01905e-187	1.31164	0.821	0.415	1.40181e-183	6	SLO2
sm1	1.01915e-96	0.556037	0.996	0.961	1.40195e-92	6	sm
Snoo2	1.27975e-99	0.813634	0.785	0.537	1.76042e-95	6	Snoo
snRNA:7SK2	6.28751e-46	0.48649	0.839	0.782	8.6491e-42	6	snRNA:7SK
Sox102F2	1.19878e-167	0.929557	0.599	0.165	1.64904e-163	6	Sox102F
Spn1	5.18265e-40	0.269665	0.986	0.968	7.12925e-36	6	Spn
sqd	6.00203e-24	0.291494	0.906	0.922	8.25639e-20	6	sqd
stai1	2.55778e-160	0.606706	0.996	0.96	3.51848e-156	6	stai
stv	7.44256e-09	0.394164	0.3	0.242	0.00010238	6	stv
Su(var)2051	2.24497e-28	0.33674	0.812	0.804	3.08819e-24	6	Su(var)205
Teh12	6.84342e-291	1.63625	0.966	0.631	9.4138e-287	6	Teh1
tmod	6.61652e-06	0.292764	0.443	0.462	0.0910168	6	tmod
tna1	7.28522e-57	0.406505	0.953	0.916	1.00216e-52	6	tna
tok1	4.20048e-76	0.732837	0.595	0.304	5.77818e-72	6	tok
toy4	4.62402e-115	0.724563	0.929	0.542	6.3608e-111	6	toy
trn2	1.53561e-16	0.346418	0.582	0.479	2.11238e-12	6	trn
trv2	1.25815e-146	0.68933	0.995	0.867	1.73072e-142	6	trv
trx1	2.31943e-14	0.281318	0.731	0.775	3.1906e-10	6	trx
Tsp39D2	8.71385e-28	0.341583	0.812	0.795	1.19868e-23	6	Tsp39D
ttv1	3.50107e-91	0.709803	0.839	0.666	4.81608e-87	6	ttv
tty	9.02884e-09	0.276782	0.606	0.643	0.000124201	6	tty
VAChT1	1.086e-11	0.280278	0.617	0.562	1.49391e-07	6	VAChT
wit2	9.42909e-23	0.462226	0.313	0.184	1.29706e-18	6	wit
X11Lbeta2	1.92176e-17	0.331021	0.678	0.635	2.64357e-13	6	X11Lbeta
alien	3.81339e-12	0.315205	0.116	0.288	5.2457e-08	7	alien
Alk	1.44624e-23	0.252093	0.349	0.818	1.98945e-19	7	Alk
alpha-Man-IIb	4.99661e-12	0.345041	0.124	0.297	6.87334e-08	7	alpha-Man-IIb
aph-1	1.42188e-12	0.32993	0.131	0.311	1.95594e-08	7	aph-1
bai	1.67059e-19	0.387747	0.215	0.53	2.29807e-15	7	bai
beat-IIIc2	1.23254e-10	0.270749	0.239	0.463	1.69549e-06	7	beat-IIIc
betaTub56D2	0.000914379	0.390778	0.713	0.927	1	7	betaTub56D
Blimp-12	5.89865e-12	0.279551	0.131	0.303	8.11418e-08	7	Blimp-1
CaBP11	1.00512e-10	0.591178	0.257	0.517	1.38264e-06	7	CaBP1
CadN1	4.22757e-21	0.372014	0.396	0.873	5.81544e-17	7	CadN
Calr1	0.000368452	0.655029	0.592	0.864	1	7	Calr
Cals	4.52484e-05	0.658012	0.432	0.822	0.622437	7	Cals
CASK	1.26011e-08	0.291942	0.432	0.855	0.000173341	7	CASK
cathD	3.54672e-11	0.593564	0.241	0.494	4.87887e-07	7	cathD
Cbp53E2	1.42099e-05	0.251451	0.289	0.478	0.195471	7	Cbp53E
CD98hc1	7.00554e-09	0.635227	0.177	0.358	9.63682e-05	7	CD98hc
CG108041	3.14036e-10	0.463016	0.185	0.39	4.31987e-06	7	CG10804
CG1161	5.57556e-19	0.307986	0.215	0.509	7.66974e-15	7	CG1161
CG12213	3.67416e-19	0.353407	0.169	0.428	5.05417e-15	7	CG12213
CG125941	2.90418e-08	0.424002	0.291	0.532	0.000399499	7	CG12594
CG1265	6.4159e-18	0.296801	0.137	0.368	8.82572e-14	7	CG1265
CG131082	5.17294e-18	0.254962	0.273	0.621	7.1159e-14	7	CG13108
CG1371	1.52134e-12	0.265151	0.108	0.273	2.09276e-08	7	CG1371
CG14767	5.7047e-22	0.316545	0.213	0.541	7.84738e-18	7	CG14767
CG157651	9.4029e-14	0.465989	0.333	0.668	1.29346e-09	7	CG15765
CG178391	6.02816e-13	0.316841	0.145	0.341	8.29233e-09	7	CG17839
CG22691	5.72603e-05	0.838369	0.378	0.678	0.787673	7	CG2269
CG2918	7.75525e-16	0.413068	0.179	0.427	1.06681e-11	7	CG2918
CG31030	8.05619e-10	0.343088	0.438	0.893	1.10821e-05	7	CG31030
CG315221	1.22315e-15	0.253853	0.135	0.344	1.68256e-11	7	CG31522
CG31650	1.20884e-26	0.274828	0.195	0.537	1.66288e-22	7	CG31650
CG31690	8.46929e-07	0.480615	0.207	0.38	0.0116504	7	CG31690
CG318141	2.4573e-05	0.255472	0.221	0.364	0.338026	7	CG31814
CG32441	1.4803e-25	0.284146	0.277	0.684	2.03629e-21	7	CG32441
CG325211	3.48561e-10	0.295306	0.187	0.374	4.7948e-06	7	CG32521
CG326981	3.01876e-11	0.254689	0.133	0.298	4.15261e-07	7	CG32698
CG33129	1.14338e-11	0.343527	0.386	0.801	1.57284e-07	7	CG33129
CG33303	2.0491e-19	0.330258	0.205	0.5	2.81875e-15	7	CG33303
CG335431	1.49977e-18	0.270994	0.287	0.603	2.06308e-14	7	CG33543
CG343703	4.41671e-12	0.266361	0.131	0.301	6.07562e-08	7	CG34370
CG35561	3.9805e-21	0.315486	0.207	0.522	5.47558e-17	7	CG3556
CG3662	1.47234e-27	0.254513	0.229	0.609	2.02535e-23	7	CG3662
CG3887	6.92879e-17	0.441667	0.249	0.574	9.53125e-13	7	CG3887
CG423461	2.40385e-13	0.396826	0.118	0.306	3.30674e-09	7	CG42346
CG423941	1.99521e-19	0.254355	0.129	0.368	2.7446e-15	7	CG42394
CG426131	5.35698e-09	0.286419	0.41	0.795	7.36906e-05	7	CG42613
CG42724	2.93147e-20	0.259999	0.155	0.414	4.03253e-16	7	CG42724
CG42817	3.03018e-24	0.271205	0.221	0.574	4.16831e-20	7	CG42817
CG4341	6.86644e-12	0.292626	0.177	0.378	9.44547e-08	7	CG4341
CG437371	8.44488e-05	0.451873	0.486	0.825	1	7	CG43737
CG43795	6.93785e-12	0.350872	0.137	0.318	9.54371e-08	7	CG43795
CG4587	0.00152713	0.436172	0.522	0.934	1	7	CG4587
CG4729	3.90411e-27	0.28467	0.197	0.536	5.37049e-23	7	CG4729
CG57581	0.000489051	0.795364	0.241	0.402	1	7	CG5758
CG5885	3.8309e-20	0.31014	0.217	0.533	5.26979e-16	7	CG5885
CG6184	1.88737e-11	0.377311	0.135	0.311	2.59626e-07	7	CG6184
CG6495	2.32643e-15	0.370657	0.116	0.315	3.20024e-11	7	CG6495
CG7484	2.88258e-20	0.299898	0.237	0.573	3.96527e-16	7	CG7484
CG8248	6.42315e-14	0.259396	0.104	0.284	8.83569e-10	7	CG8248
CG8602	1.28174e-10	0.393304	0.139	0.31	1.76316e-06	7	CG8602
CG8860	2.33878e-21	0.330499	0.269	0.641	3.21723e-17	7	CG8860
CG98131	5.18284e-11	0.508776	0.187	0.39	7.12951e-07	7	CG9813
CG99192	1.13554e-06	0.33877	0.438	0.827	0.0156205	7	CG9919
CG9953	5.48031e-05	0.640692	0.175	0.305	0.753872	7	CG9953
CHOp24	4.85139e-20	0.337915	0.205	0.501	6.67357e-16	7	CHOp24
Cnx99A	5.8872e-11	0.540836	0.307	0.629	8.09843e-07	7	Cnx99A
Con2	5.26227e-05	0.377635	0.404	0.654	0.723878	7	Con
Cow1	1.64229e-30	0.321136	0.297	0.738	2.25913e-26	7	Cow
Cp1	5.29091e-15	0.515114	0.265	0.588	7.27818e-11	7	Cp1
CR453121	5.82779e-12	0.425893	0.219	0.459	8.0167e-08	7	CR45312
CR45332	0.000106768	0.534037	0.197	0.339	1	7	CR45332
CtsB1	4.58478e-19	0.303604	0.124	0.357	6.30682e-15	7	CtsB1
dally1	1.89059e-14	0.361956	0.141	0.349	2.6007e-10	7	dally
dati1	1.94431e-06	0.467917	0.191	0.354	0.0267459	7	dati
DCTN3-p24	4.75498e-15	0.274685	0.104	0.287	6.54095e-11	7	DCTN3-p24
Diap1	4.96581e-22	0.264115	0.209	0.526	6.83097e-18	7	Diap1
DIP-delta2	1.75082e-06	0.54953	0.171	0.321	0.0240843	7	DIP-delta
dpr1	1.19144e-06	0.290534	0.434	0.747	0.0163894	7	dpr1
Dscam11	3.99617e-20	0.31965	0.343	0.783	5.49714e-16	7	Dscam1
Dscam31	6.77919e-12	0.33568	0.187	0.389	9.32546e-08	7	Dscam3
ed1	2.02009e-18	0.27603	0.187	0.454	2.77884e-14	7	ed
eEF1alpha1	1.9036e-06	1.08414	0.355	0.678	0.0261859	7	eEF1alpha1
eIF4G1	3.92725e-26	0.302356	0.235	0.615	5.40232e-22	7	eIF4G1
Eph	5.4527e-25	0.263093	0.217	0.561	7.50073e-21	7	Eph
ergic53	3.46004e-17	0.451777	0.233	0.538	4.75963e-13	7	ergic53
ERp60	5.31694e-17	0.348106	0.205	0.478	7.31399e-13	7	ERp60
Ext2	4.62389e-19	0.325461	0.112	0.339	6.36062e-15	7	Ext2
eys3	1.7948e-15	0.323357	0.327	0.677	2.46893e-11	7	eys
Fas31	1.21202e-08	0.493107	0.291	0.541	0.000166725	7	Fas3
Fer1HCH1	0.00120323	0.458783	0.454	0.829	1	7	Fer1HCH
Fie1	1.52194e-22	0.258899	0.12	0.375	2.09358e-18	7	Fie
fred1	7.83239e-12	0.435912	0.267	0.533	1.07742e-07	7	fred
Fur11	3.73605e-16	0.28852	0.201	0.463	5.13931e-12	7	Fur1
fwe2	8.00458e-23	0.250448	0.179	0.479	1.10111e-18	7	fwe
GABA-B-R1	8.26981e-13	0.429044	0.373	0.798	1.13759e-08	7	GABA-B-R1
Gabat1	5.44813e-19	0.380794	0.221	0.518	7.49444e-15	7	Gabat
Gapdh12	2.9467e-23	0.250839	0.195	0.515	4.05348e-19	7	Gapdh1
GCS2alpha	1.63172e-17	0.425005	0.189	0.453	2.24459e-13	7	GCS2alpha
GluRIA2	3.77978e-17	0.464844	0.223	0.524	5.19947e-13	7	GluRIA
GluRIB2	7.90857e-06	0.573755	0.384	0.664	0.10879	7	GluRIB
Gp931	2.95347e-20	0.284766	0.185	0.467	4.0628e-16	7	Gp93
Hasp2	3.32785e-11	0.613674	0.307	0.626	4.57779e-07	7	Hasp
HIP-R	2.14829e-23	0.289688	0.193	0.51	2.95519e-19	7	HIP-R
Hs3st-B1	5.06519e-15	0.359665	0.205	0.473	6.96768e-11	7	Hs3st-B
Hsc70-3	4.84904e-15	0.439649	0.305	0.665	6.67033e-11	7	Hsc70-3
IA-21	2.04674e-06	0.510142	0.46	0.745	0.0281549	7	IA-2
InR	1.74566e-16	0.347271	0.225	0.512	2.40133e-12	7	InR
kcc1	7.60419e-11	0.676293	0.305	0.621	1.04603e-06	7	kcc
kek22	9.99664e-07	0.266882	0.442	0.78	0.0137514	7	kek2
kirre	1.66449e-09	0.353805	0.305	0.575	2.28967e-05	7	kirre
kug	4.10529e-16	0.359253	0.179	0.432	5.64724e-12	7	kug
l(1)G0289	2.20383e-23	0.283768	0.143	0.421	3.03158e-19	7	l(1)G0289
l(2)k09913	7.24723e-20	0.335796	0.169	0.447	9.96929e-16	7	l(2)k09913
Lamp11	5.81894e-11	0.411672	0.361	0.752	8.00454e-07	7	Lamp1
Lar2	3.20643e-06	0.33967	0.494	0.929	0.0441076	7	Lar
LpR11	2.95666e-12	0.321324	0.157	0.355	4.06718e-08	7	LpR1
Lrp41	1.36075e-11	0.539671	0.217	0.458	1.87184e-07	7	Lrp4
mbl2	0.00155111	0.287987	0.43	0.645	1	7	mbl
Mdh1	8.79783e-17	0.33546	0.151	0.382	1.21023e-12	7	Mdh1
mgl1	6.74904e-07	0.598531	0.205	0.384	0.00928397	7	mgl
Mp3	3.96935e-17	0.34163	0.347	0.707	5.46024e-13	7	Mp
MRE161	4.66167e-71	0.348532	0.809	0.994	6.41259e-67	7	MRE16
mRpL28	1.9722e-14	0.273535	0.088	0.257	2.71296e-10	7	mRpL28
Mtor	8.85045e-18	0.255271	0.116	0.331	1.21747e-13	7	Mtor
Myo81F1	3.70721e-06	0.406145	0.454	0.844	0.0509964	7	Myo81F
MYPT-75D	5.40771e-13	0.295466	0.201	0.438	7.43885e-09	7	MYPT-75D
nAChRbeta12	1.30275e-05	0.279326	0.508	0.948	0.179206	7	nAChRbeta1
nemy1	2.38051e-10	0.488576	0.199	0.413	3.27463e-06	7	nemy
NFAT1	1.58876e-10	0.381098	0.169	0.362	2.18549e-06	7	NFAT
nkd	9.70378e-10	0.378539	0.301	0.585	1.33485e-05	7	nkd
Nmda1	7.9272e-27	0.259381	0.181	0.509	1.09047e-22	7	Nmda1
nolo1	1.1926e-08	0.529708	0.265	0.511	0.000164054	7	nolo
Nrg2	9.69938e-10	0.3345	0.426	0.848	1.33425e-05	7	Nrg
nrv31	0.000648822	0.374774	0.779	0.998	1	7	nrv3
Nrx-1	3.18558e-09	0.4293	0.424	0.861	4.38209e-05	7	Nrx-1
NUCB11	7.35718e-14	0.462149	0.341	0.718	1.01205e-09	7	NUCB1
Oatp74D1	8.13478e-17	0.335899	0.307	0.666	1.11902e-12	7	Oatp74D
Ostgamma	1.00055e-18	0.306168	0.169	0.436	1.37636e-14	7	Ostgamma
Pdi	4.03251e-18	0.38736	0.261	0.6	5.54712e-14	7	Pdi
PIG-T	9.19758e-16	0.365637	0.127	0.335	1.26522e-11	7	PIG-T
PlexA	6.2917e-25	0.350968	0.273	0.682	8.65487e-21	7	PlexA
Plod	2.3082e-12	0.321714	0.127	0.305	3.17516e-08	7	Plod
pre-rRNA:CR45845	4.13394e-17	0.34652	0.165	0.408	5.68665e-13	7	pre-rRNA:CR45845
prominin-like1	7.46212e-28	0.299059	0.263	0.676	1.02649e-23	7	prominin-like
Ptp10D2	3.83289e-08	0.453584	0.347	0.668	0.000527252	7	Ptp10D
Ptp69D	1.07457e-14	0.407972	0.133	0.335	1.47818e-10	7	Ptp69D
Pvf32	5.9318e-06	0.348931	0.454	0.68	0.0815979	7	Pvf3
Pxn2	4.26117e-26	0.319064	0.201	0.549	5.86166e-22	7	Pxn
robo1	4.46132e-17	0.2921	0.133	0.356	6.13699e-13	7	robo1
robo31	1.26167e-12	0.269603	0.133	0.322	1.73556e-08	7	robo3
Sap-r	3.88215e-16	0.337045	0.12	0.326	5.34029e-12	7	Sap-r
Sar1	1.04987e-20	0.258457	0.307	0.723	1.4442e-16	7	Sar1
Scgalpha	5.99153e-24	0.346537	0.219	0.56	8.24195e-20	7	Scgalpha
schlank	4.2911e-16	0.457146	0.321	0.712	5.90284e-12	7	schlank
scu	7.45482e-09	0.412575	0.118	0.256	0.000102549	7	scu
Sec61alpha	5.77833e-19	0.285271	0.155	0.405	7.94867e-15	7	Sec61alpha
sif1	5.59716e-17	0.293918	0.293	0.644	7.69946e-13	7	sif
SKIP2	3.21928e-21	0.259108	0.235	0.569	4.42844e-17	7	SKIP
sli	6.73043e-15	0.403799	0.163	0.392	9.25838e-11	7	sli
smog	6.20109e-24	0.294044	0.201	0.518	8.53022e-20	7	smog
SP23531	3.17999e-27	0.349025	0.281	0.704	4.3744e-23	7	SP2353
Stt3A	4.01598e-11	0.373749	0.102	0.251	5.52438e-07	7	Stt3A
Stt3B	1.95485e-13	0.318653	0.114	0.297	2.68909e-09	7	Stt3B
Tace	3.00875e-12	0.399342	0.143	0.33	4.13884e-08	7	Tace
Tango1	4.19896e-11	0.325008	0.127	0.288	5.77608e-07	7	Tango1
Toll-71	8.95695e-18	0.278883	0.147	0.383	1.23212e-13	7	Toll-7
Tpi2	5.62031e-11	0.449147	0.227	0.467	7.7313e-07	7	Tpi
Tsp42Ee	9.61269e-11	0.464112	0.167	0.352	1.32232e-06	7	Tsp42Ee
Vha100-1	6.2893e-25	0.308927	0.269	0.665	8.65156e-21	7	Vha100-1
VhaM9.7-b	7.19361e-24	0.251492	0.124	0.391	9.89553e-20	7	VhaM9.7-b
wry3	7.08541e-14	0.379423	0.319	0.656	9.74669e-10	7	wry
Zir	1.51793e-14	0.251071	0.102	0.284	2.08806e-10	7	Zir
Ace3	2.90789e-25	0.325604	0.897	0.771	4.00009e-21	8	Ace
AdipoR	8.66627e-17	0.318525	0.642	0.558	1.19213e-12	8	AdipoR
alc	1.97612e-22	0.368954	0.654	0.534	2.71835e-18	8	alc
alphaSnap	5.81053e-22	0.253164	0.955	0.897	7.99296e-18	8	alphaSnap
AstA-R11	2.96474e-248	1.08306	0.677	0.154	4.07829e-244	8	AstA-R1
AstC-R21	4.36847e-51	1.24024	0.611	0.406	6.00927e-47	8	AstC-R2
Atet	1.4241e-16	0.258378	0.757	0.679	1.95899e-12	8	Atet
Atox13	9.31025e-67	0.40072	0.981	0.937	1.28072e-62	8	Atox1
beat-IV	5.08074e-64	0.606789	0.673	0.367	6.98906e-60	8	beat-IV
beat-Va1	5.50474e-08	0.267294	0.424	0.349	0.000757232	8	beat-Va
bin3	1.44667e-09	0.271722	0.545	0.483	1.99004e-05	8	bin3
br1	2.87182e-117	0.398991	0.626	0.186	3.95048e-113	8	br
bves	3.13739e-16	0.39233	0.508	0.408	4.31579e-12	8	bves
Bx3	4.82886e-69	0.355899	0.844	0.429	6.64258e-65	8	Bx
CanB22	1.32994e-42	0.33743	0.971	0.89	1.82946e-38	8	CanB2
CenG1A1	4.33059e-36	0.502615	0.416	0.214	5.95716e-32	8	CenG1A
CG10011	5.53307e-73	0.815064	0.743	0.502	7.61129e-69	8	CG10011
CG10077	1.37662e-17	0.279267	0.903	0.861	1.89368e-13	8	CG10077
CG10257	3.98247e-67	0.412462	0.265	0.064	5.47829e-63	8	CG10257
CG11191	5.66939e-15	0.315918	0.514	0.388	7.79881e-11	8	CG11191
CG112211	2.02919e-36	0.559761	0.368	0.172	2.79136e-32	8	CG11221
CG122901	5.88067e-123	0.828543	0.504	0.15	8.08945e-119	8	CG12290
CG126051	2.92418e-18	0.267152	0.846	0.787	4.0225e-14	8	CG12605
CG13054	1.00614e-08	0.266444	0.265	0.183	0.000138404	8	CG13054
CG130551	3.44361e-73	0.690839	0.813	0.59	4.73702e-69	8	CG13055
CG136981	9.1988e-20	0.307196	0.257	0.124	1.26539e-15	8	CG13698
CG13893	1.66169e-23	0.460703	0.348	0.198	2.28582e-19	8	CG13893
CG139202	2.57116e-199	0.838611	0.998	0.953	3.53689e-195	8	CG13920
CG140243	3.72127e-14	0.269125	0.644	0.557	5.11897e-10	8	CG14024
CG14079	0	0.662738	0.294	0.009	0	8	CG14079
CG140821	8.87896e-175	1.04683	0.626	0.177	1.22139e-170	8	CG14082
CG141862	0.00861196	0.258741	0.484	0.502	1	8	CG14186
CG14207	1.16511e-21	0.402693	0.422	0.281	1.60272e-17	8	CG14207
CG144311	3.64146e-62	0.583243	0.461	0.189	5.00919e-58	8	CG14431
CG144591	1.15619e-220	1.15276	0.833	0.245	1.59045e-216	8	CG14459
CG15097	1.56541e-08	0.275252	0.401	0.334	0.000215338	8	CG15097
CG15628	6.12807e-79	0.746795	0.846	0.642	8.42977e-75	8	CG15628
CG157652	3.12534e-104	0.770862	0.953	0.65	4.29921e-100	8	CG15765
CG16779	9.94637e-78	0.580718	0.944	0.826	1.36822e-73	8	CG16779
CG172702	7.48006e-26	0.304114	0.844	0.763	1.02896e-21	8	CG17270
CG177162	1.8875e-70	0.519105	0.928	0.598	2.59644e-66	8	CG17716
CG177781	5.3907e-91	0.870028	0.815	0.528	7.41544e-87	8	CG17778
CG301162	2.63988e-121	0.825896	0.903	0.567	3.63142e-117	8	CG30116
CG304631	1.1049e-50	0.480805	0.819	0.578	1.5199e-46	8	CG30463
CG3104	2.73462e-11	0.323236	0.393	0.307	3.76174e-07	8	CG3104
CG316761	1.87984e-184	0.904016	0.765	0.217	2.58591e-180	8	CG31676
CG316901	4.42933e-16	0.336022	0.496	0.372	6.09299e-12	8	CG31690
CG318142	0	1.73282	0.992	0.341	0	8	CG31814
CG322041	3.25647e-41	0.579533	0.547	0.316	4.4796e-37	8	CG32204
CG32683	1.00444e-67	0.605084	0.706	0.381	1.38171e-63	8	CG32683
CG341553	7.16128e-76	0.514015	0.749	0.379	9.85106e-72	8	CG34155
CG343543	1.4037e-40	0.436775	0.868	0.664	1.93093e-36	8	CG34354
CG34377	1.6743e-292	1.07719	0.607	0.096	2.30317e-288	8	CG34377
CG343832	9.18373e-143	0.834595	0.975	0.747	1.26331e-138	8	CG34383
CG37261	1.97761e-46	0.496649	0.679	0.41	2.7204e-42	8	CG3726
CG423134	1.38546e-103	0.696562	0.986	0.741	1.90584e-99	8	CG42313
CG423403	5.24887e-27	0.323976	0.874	0.733	7.22034e-23	8	CG42340
CG4238	7.39479e-17	0.391245	0.354	0.235	1.01723e-12	8	CG4238
CG425414	1.53382e-70	0.489203	0.975	0.818	2.10993e-66	8	CG42541
CG42663	1.41476e-32	0.484987	0.467	0.272	1.94615e-28	8	CG42663
CG42668	3.97638e-18	0.319774	0.704	0.626	5.4699e-14	8	CG42668
CG427501	1.99406e-169	0.979881	0.977	0.716	2.74303e-165	8	CG42750
CG431431	3.93744e-27	0.397592	0.712	0.57	5.41634e-23	8	CG43143
CG436582	1.41796e-220	1.61134	0.965	0.566	1.95055e-216	8	CG43658
CG43689	0	1.85161	0.984	0.134	0	8	CG43689
CG437372	1.26952e-32	0.273832	0.953	0.811	1.74636e-28	8	CG43737
CG437951	7.56945e-110	0.884531	0.695	0.302	1.04125e-105	8	CG43795
CG441532	1.04294e-40	0.366684	0.798	0.554	1.43466e-36	8	CG44153
CG44671	1.02032e-88	0.710794	0.877	0.631	1.40356e-84	8	CG4467
CG44837	1.50362e-67	0.659971	0.702	0.42	2.06837e-63	8	CG44837
CG452631	9.02155e-157	0.881613	0.986	0.674	1.241e-152	8	CG45263
CG48291	8.26236e-230	1.12715	0.807	0.225	1.13657e-225	8	CG4829
CG50651	3.38634e-12	0.251938	0.671	0.612	4.65825e-08	8	CG5065
CG58301	2.31662e-05	0.303159	0.294	0.244	0.318674	8	CG5830
CG6329	3.83194e-82	0.379568	0.996	0.973	5.27122e-78	8	CG6329
CG6770	1.1611e-31	0.306731	0.959	0.911	1.59721e-27	8	CG6770
CG7220	7.67732e-75	0.828886	0.745	0.517	1.05609e-70	8	CG7220
CG88611	3.89346e-292	1.5601	0.994	0.422	5.35585e-288	8	CG8861
CG89102	7.71859e-12	0.312719	0.42	0.323	1.06177e-07	8	CG8910
CG9008	1.20143e-94	0.65786	0.381	0.104	1.65269e-90	8	CG9008
CG93281	4.48422e-15	0.381272	0.416	0.307	6.16849e-11	8	CG9328
Con3	4.87647e-270	1.54669	0.998	0.637	6.70807e-266	8	Con
Cow2	1.1228e-188	1.04998	0.984	0.718	1.54453e-184	8	Cow
cpo3	2.74028e-132	0.638839	0.996	0.947	3.76953e-128	8	cpo
CR443201	7.16715e-103	0.75434	0.416	0.117	9.85913e-99	8	CR44320
CR453321	3.66556e-31	0.422533	0.527	0.329	5.04234e-27	8	CR45332
CR45347	1.21301e-26	0.435262	0.3	0.146	1.66862e-22	8	CR45347
CR45660	6.2392e-100	0.563986	0.358	0.087	8.58264e-96	8	CR45660
CR45962	8.61595e-20	0.332024	0.257	0.131	1.18521e-15	8	CR45962
crb	3.93146e-44	0.487575	0.346	0.14	5.40812e-40	8	crb
Dad	1.03775e-08	0.259062	0.395	0.323	0.000142753	8	Dad
Dat	9.99825e-58	0.57959	0.687	0.371	1.37536e-53	8	Dat
DIP-eta	7.06164e-274	0.974448	0.722	0.147	9.71399e-270	8	DIP-eta
DIP-theta	1.26527e-299	1.44799	0.975	0.316	1.7405e-295	8	DIP-theta
disco	0	1.60105	0.86	0.094	0	8	disco
disco-r	0	1.25807	0.724	0.077	0	8	disco-r
Dlic	7.92154e-14	0.289255	0.628	0.563	1.08969e-09	8	Dlic
dmrt99B	2.32021e-175	0.569004	0.274	0.031	3.19168e-171	8	dmrt99B
dnc3	6.68231e-34	0.270062	0.967	0.933	9.19219e-30	8	dnc
dpr11	4.39121e-41	0.396217	0.772	0.526	6.04055e-37	8	dpr11
dpr132	6.23776e-80	0.5858	0.955	0.674	8.58066e-76	8	dpr13
dpr171	2.61656e-152	1.00127	0.84	0.386	3.59934e-148	8	dpr17
dpr21	1.38449e-15	0.289723	0.481	0.352	1.9045e-11	8	dpr2
dpr31	3.97206e-22	0.37611	0.504	0.335	5.46397e-18	8	dpr3
dpr61	5.44689e-39	0.457946	0.776	0.564	7.49274e-35	8	dpr6
Dscam22	7.02741e-62	0.337907	1	0.969	9.6669e-58	8	Dscam2
Dtg	0	1.8656	0.848	0.076	0	8	Dtg
Dys	1.25537e-61	0.622294	0.733	0.482	1.72688e-57	8	Dys
eag1	3.41153e-43	0.512431	0.73	0.502	4.6929e-39	8	eag
eIF4EHP1	8.06123e-19	0.298316	0.835	0.779	1.1089e-14	8	eIF4EHP
Eip63E	2.11079e-17	0.286817	0.821	0.731	2.9036e-13	8	Eip63E
Eip75B1	4.10172e-19	0.4018	0.763	0.672	5.64232e-15	8	Eip75B
emc1	8.21694e-23	0.298735	0.833	0.716	1.13032e-18	8	emc
Fis1	2.50983e-25	0.269245	0.936	0.889	3.45253e-21	8	Fis1
Frq22	5.10517e-32	0.321265	0.87	0.717	7.02268e-28	8	Frq2
GFP3	7.54812e-36	0.480745	0.877	0.881	1.03832e-31	8	GFP
GluClalpha3	1.36119e-115	0.684242	0.981	0.915	1.87246e-111	8	GluClalpha
Glut4EF1	2.18313e-56	0.472473	0.944	0.849	3.00311e-52	8	Glut4EF
gpp3	1.84936e-25	0.300198	0.819	0.742	2.54398e-21	8	gpp
Gug1	6.84198e-18	0.271892	0.827	0.787	9.41183e-14	8	Gug
gukh	6.89146e-14	0.278441	0.549	0.448	9.47989e-10	8	gukh
His3.3B1	3.59385e-78	0.373875	0.996	0.979	4.9437e-74	8	His3.3B
Hr31	1.42785e-10	0.250472	0.679	0.65	1.96414e-06	8	Hr3
Hr382	0.000920178	0.461181	0.535	0.523	1	8	Hr38
Hr43	4.95658e-54	0.385517	0.967	0.91	6.81828e-50	8	Hr4
Hsp67Bc1	3.68766e-85	0.432732	0.998	0.994	5.07275e-81	8	Hsp67Bc
Hsromega1	1.32293e-36	0.28625	0.996	0.98	1.81982e-32	8	Hsromega
hwt1	1.30714e-56	0.491758	0.92	0.811	1.7981e-52	8	hwt
Ih	1.15187e-111	0.694587	0.969	0.836	1.58452e-107	8	Ih
Imp2	5.52955e-61	0.294333	0.535	0.19	7.60644e-57	8	Imp
inaE1	2.19861e-54	0.560479	0.776	0.592	3.02441e-50	8	inaE
IRSp53	0	1.59242	0.786	0.043	0	8	IRSp53
kay1	7.9142e-07	0.372716	0.309	0.242	0.0108868	8	kay
kek32	1.79805e-63	0.605154	0.7	0.397	2.4734e-59	8	kek3
kek61	3.48102e-08	0.275993	0.475	0.425	0.000478849	8	kek6
klar	1.06078e-51	0.496769	0.893	0.772	1.45921e-47	8	klar
ko	1.36032e-42	0.387159	0.257	0.086	1.87126e-38	8	ko
kug1	1.80699e-12	0.268673	0.533	0.421	2.48569e-08	8	kug
kuz1	5.79508e-27	0.327056	0.858	0.764	7.97171e-23	8	kuz
lbk2	3.1936e-53	0.563259	0.757	0.524	4.39311e-49	8	lbk
lbm	4.56569e-81	0.71781	0.477	0.17	6.28057e-77	8	lbm
lilli	1.30277e-13	0.275636	0.683	0.631	1.7921e-09	8	lilli
lov	8.60473e-238	0.636628	0.325	0.032	1.18367e-233	8	lov
mam1	1.36705e-41	0.361431	0.936	0.854	1.88051e-37	8	mam
mamo3	2.18273e-95	0.544114	0.949	0.515	3.00257e-91	8	mamo
Mbs	8.52518e-16	0.362779	0.578	0.495	1.17272e-11	8	Mbs
mGluR3	4.47091e-25	0.431974	0.512	0.331	6.15018e-21	8	mGluR
Mkp31	3.13705e-32	0.715899	0.679	0.524	4.31532e-28	8	Mkp3
msn	3.77001e-43	0.566718	0.673	0.507	5.18602e-39	8	msn
mtt	6.72224e-35	0.499696	0.36	0.174	9.24711e-31	8	mtt
nAChRalpha11	1.15294e-20	0.292445	0.893	0.836	1.58598e-16	8	nAChRalpha1
nAChRalpha31	2.49788e-23	0.314375	0.673	0.493	3.43609e-19	8	nAChRalpha3
nAChRalpha62	6.65472e-105	0.638473	0.977	0.714	9.15423e-101	8	nAChRalpha6
nAChRalpha71	8.44445e-59	0.456163	0.965	0.77	1.16162e-54	8	nAChRalpha7
Nckx30C	9.05364e-35	0.343008	0.938	0.891	1.24542e-30	8	Nckx30C
Nlg21	1.84614e-41	0.443502	0.866	0.735	2.53955e-37	8	Nlg2
Nlg4	6.68701e-98	0.787157	0.786	0.455	9.19866e-94	8	Nlg4
norpA1	2.58036e-35	0.435019	0.722	0.562	3.54954e-31	8	norpA
numb2	1.04747e-13	0.341898	0.519	0.43	1.4409e-09	8	numb
Oamb1	1.94501e-16	0.298244	0.313	0.184	2.67555e-12	8	Oamb
Octbeta2R2	5.79011e-49	0.438734	0.852	0.603	7.96488e-45	8	Octbeta2R
orb21	8.10928e-15	0.260293	0.889	0.846	1.11551e-10	8	orb2
para1	4.8976e-77	0.387404	1	0.979	6.73713e-73	8	para
pHCl-11	1.65347e-23	0.351245	0.685	0.524	2.27452e-19	8	pHCl-1
Prosap2	1.14101e-78	0.445927	0.986	0.946	1.56958e-74	8	Prosap
ps	3.1904e-41	0.304493	0.996	0.963	4.38872e-37	8	ps
Ptp99A2	5.22852e-82	0.546408	0.99	0.893	7.19236e-78	8	Ptp99A
puc3	5.57755e-24	0.620481	0.558	0.421	7.67248e-20	8	puc
Pvf33	7.26462e-55	0.39124	0.971	0.665	9.99321e-51	8	Pvf3
Pxn3	9.9595e-264	1.41981	0.988	0.526	1.37003e-259	8	Pxn
qvr1	2.61629e-69	0.431901	0.979	0.92	3.59897e-65	8	qvr
RASSF8	1.00854e-27	0.412239	0.755	0.662	1.38735e-23	8	RASSF8
rdgA2	1.04317e-213	1.25264	0.992	0.645	1.43498e-209	8	rdgA
rgn1	7.62472e-164	1.05094	0.864	0.394	1.04886e-159	8	rgn
ringer1	1.56961e-52	0.460546	0.963	0.928	2.15916e-48	8	ringer
RyR	6.788e-13	0.28981	0.28	0.178	9.33758e-09	8	RyR
S1	4.90761e-17	0.383678	0.556	0.468	6.7509e-13	8	S
sbb1	2.62883e-41	0.311785	0.984	0.943	3.61622e-37	8	sbb
scro3	4.66597e-69	0.498499	0.623	0.248	6.41851e-65	8	scro
Sema1a1	5.14829e-137	0.680257	1	0.949	7.08199e-133	8	Sema1a
shakB2	9.66821e-225	0.876289	1	0.98	1.32996e-220	8	shakB
side	9.72638e-154	0.836225	0.99	0.739	1.33796e-149	8	side
sky2	1.15949e-47	0.48877	0.842	0.692	1.59499e-43	8	sky
smal2	3.62567e-64	0.616236	0.827	0.601	4.98748e-60	8	smal
Snoo3	8.31589e-59	0.570561	0.77	0.538	1.14393e-54	8	Snoo
SoxN1	2.54935e-85	0.454906	0.741	0.277	3.50688e-81	8	SoxN
SP10291	2.23698e-88	0.594698	0.385	0.102	3.07718e-84	8	SP1029
Src64B	2.24373e-13	0.313914	0.541	0.471	3.08647e-09	8	Src64B
sty2	0.000389868	0.573048	0.519	0.516	1	8	sty
Sxl1	4.53315e-28	0.345939	0.874	0.842	6.23581e-24	8	Sxl
Syn11	1.00024e-32	0.301147	0.893	0.788	1.37593e-28	8	Syn1
Syx1A1	9.77804e-102	0.493411	0.996	0.969	1.34507e-97	8	Syx1A
Ten-m2	6.71964e-66	0.624277	0.846	0.614	9.24353e-62	8	Ten-m
tipE	5.64936e-14	0.353203	0.535	0.456	7.77126e-10	8	tipE
tna2	3.9308e-45	0.350676	0.975	0.915	5.40721e-41	8	tna
tok2	5.48573e-55	0.499663	0.605	0.305	7.54617e-51	8	tok
Toll-62	2.53786e-135	0.926528	0.955	0.706	3.49109e-131	8	Toll-6
toy5	5.40516e-39	0.346377	0.895	0.545	7.43534e-35	8	toy
TrissinR	1.22487e-45	0.742346	0.395	0.178	1.68493e-41	8	TrissinR
trv3	3.65434e-122	0.67397	0.998	0.867	5.02691e-118	8	trv
Tsp42Ee1	1.12801e-10	0.251862	0.43	0.345	1.5517e-06	8	Tsp42Ee
Tsp42Ej	1.09255e-38	0.294991	0.967	0.923	1.5029e-34	8	Tsp42Ej
Tsp42El	6.94837e-150	0.623984	0.337	0.055	9.55817e-146	8	Tsp42El
Tsp47F	0	1.4245	0.391	0.006	0	8	Tsp47F
Tsp66E1	4.90612e-31	0.30031	0.969	0.86	6.74885e-27	8	Tsp66E
tutl2	1.04963e-46	0.359765	0.971	0.888	1.44387e-42	8	tutl
vimar	4.35046e-34	0.449409	0.348	0.167	5.9845e-30	8	vimar
w2	3.14074e-106	1.10531	0.798	0.511	4.32041e-102	8	w
Xrp11	6.37971e-09	0.333091	0.496	0.428	8.77592e-05	8	Xrp1
zfh22	0	1.03164	0.611	0.087	0	8	zfh2
alc1	2.61736e-45	0.43425	0.789	0.531	3.60045e-41	9	alc
alphaTub84B1	9.8735e-45	0.359643	1	0.979	1.3582e-40	9	alphaTub84B
Apoltp	1.99835e-39	0.377451	0.368	0.148	2.74893e-35	9	Apoltp
Atox14	4.95813e-55	0.334208	0.971	0.938	6.8204e-51	9	Atox1
bab1	1.029e-210	0.667998	0.537	0.096	1.41549e-206	9	bab1
bab2	1.26167e-149	0.648303	0.692	0.204	1.73555e-145	9	bab2
beat-IIa1	3.75207e-61	0.443104	0.872	0.526	5.16135e-57	9	beat-IIa
beat-IIIb2	3.5908e-96	0.647656	0.901	0.505	4.9395e-92	9	beat-IIIb
betaTub56D3	9.92412e-26	0.276871	0.986	0.919	1.36516e-21	9	betaTub56D
bol1	4.5131e-28	0.307957	0.952	0.824	6.20823e-24	9	bol
Cam	4.88252e-131	0.367201	1	0.997	6.71639e-127	9	Cam
CanB23	1.37959e-63	0.38181	0.977	0.89	1.89777e-59	9	CanB2
Cbp53E3	6.95052e-105	0.575709	0.907	0.46	9.56113e-101	9	Cbp53E
CCT4	9.45645e-30	0.324999	0.688	0.463	1.30083e-25	9	CCT4
CG100111	2.44592e-57	0.52192	0.787	0.501	3.36461e-53	9	CG10011
CG100771	9.07009e-24	0.284724	0.94	0.86	1.24768e-19	9	CG10077
CG10283	4.09808e-103	0.483788	0.483	0.14	5.63731e-99	9	CG10283
CG110301	6.49528e-37	0.289205	0.721	0.412	8.93491e-33	9	CG11030
CG111911	6.65026e-202	1.10007	0.893	0.378	9.1481e-198	9	CG11191
CG112212	1.28839e-41	0.464645	0.395	0.171	1.77231e-37	9	CG11221
CG120651	4.38631e-260	0.812066	0.587	0.096	6.03381e-256	9	CG12065
CG124841	8.13281e-74	0.511145	0.74	0.351	1.11875e-69	9	CG12484
CG12567	4.28351e-13	0.25314	0.289	0.172	5.8924e-09	9	CG12567
CG13551	1.91954e-44	0.332125	0.971	0.866	2.64052e-40	9	CG13551
CG139203	3.61508e-119	0.51734	0.992	0.953	4.9729e-115	9	CG13920
CG14274	5.1218e-128	0.418426	0.335	0.06	7.04555e-124	9	CG14274
CG144592	1.36203e-142	0.752395	0.769	0.247	1.87361e-138	9	CG14459
CG15082	0	1.32453	0.51	0.014	0	9	CG15082
CG150971	4.24482e-40	0.432156	0.583	0.329	5.83917e-36	9	CG15097
CG157653	1.15644e-60	0.414454	0.973	0.65	1.5908e-56	9	CG15765
CG16882	3.58383e-57	0.434351	0.669	0.322	4.92991e-53	9	CG1688
CG172703	4.1994e-59	0.419144	0.938	0.76	5.77669e-55	9	CG17270
CG177163	5.78051e-75	0.482504	0.961	0.597	7.95167e-71	9	CG17716
CG177782	1.78912e-63	0.547184	0.826	0.528	2.46111e-59	9	CG17778
CG178392	6.32212e-105	0.756282	0.738	0.324	8.6967e-101	9	CG17839
CG22011	1.71346e-37	0.454973	0.574	0.327	2.35704e-33	9	CG2201
CG301163	6.78224e-34	0.306586	0.841	0.569	9.32965e-30	9	CG30116
CG304632	1.47356e-93	0.599484	0.928	0.575	2.02703e-89	9	CG30463
CG31475	5.08679e-34	0.281842	0.537	0.273	6.99739e-30	9	CG31475
CG31549	2.99389e-27	0.283835	0.465	0.264	4.11839e-23	9	CG31549
CG316762	0	1.35918	0.944	0.212	0	9	CG31676
CG32267	1.99368e-22	0.290806	0.804	0.639	2.7425e-18	9	CG32267
CG326982	3.54591e-124	0.653481	0.769	0.28	4.87775e-120	9	CG32698
CG341132	5.08756e-53	0.349303	0.967	0.802	6.99845e-49	9	CG34113
CG343544	4.13685e-93	0.60481	0.969	0.661	5.69066e-89	9	CG34354
CG343704	2.53624e-35	0.302928	0.545	0.289	3.48885e-31	9	CG34370
CG423135	1.54203e-57	0.412282	0.979	0.741	2.12122e-53	9	CG42313
CG423404	3.08782e-101	0.642054	0.948	0.73	4.2476e-97	9	CG42340
CG42524	2.37872e-14	0.251546	0.444	0.289	3.27217e-10	9	CG42524
CG426631	1.01333e-74	0.509647	0.624	0.268	1.39394e-70	9	CG42663
CG427502	2.63311e-52	0.384578	0.959	0.716	3.62211e-48	9	CG42750
CG42795	1.61642e-21	0.280419	0.568	0.373	2.22355e-17	9	CG42795
CG436891	0	1.66909	0.992	0.134	0	9	CG43689
CG4404	1.36045e-31	0.285313	0.357	0.162	1.87143e-27	9	CG4404
CG444222	2.71859e-47	0.404194	0.86	0.55	3.73969e-43	9	CG44422
CG44672	5.41106e-56	0.455935	0.886	0.631	7.44346e-52	9	CG4467
CG448371	3.47962e-58	0.482981	0.75	0.419	4.78656e-54	9	CG44837
CG46339	9.08702e-41	0.494374	0.432	0.21	1.25001e-36	9	CG46339
CG6006	6.29943e-150	0.542019	0.469	0.103	8.66549e-146	9	CG6006
CG6044	6.05761e-19	0.272115	0.597	0.401	8.33285e-15	9	CG6044
CG67701	3.51696e-28	0.261851	0.963	0.911	4.83792e-24	9	CG6770
CG8498	5.45467e-30	0.265627	0.928	0.794	7.50345e-26	9	CG8498
CG89103	6.64232e-36	0.345112	0.576	0.318	9.13718e-32	9	CG8910
Cow3	2.82345e-57	0.395289	0.965	0.719	3.88394e-53	9	Cow
cpo4	1.41262e-182	0.787663	1	0.947	1.9432e-178	9	cpo
CR44628	2.93748e-107	0.351223	0.271	0.046	4.04079e-103	9	CR44628
CR453322	3.49487e-32	0.297284	0.585	0.328	4.80754e-28	9	CR45332
CR453471	5.41406e-25	0.308007	0.31	0.145	7.44758e-21	9	CR45347
CR456601	1.43744e-59	0.385276	0.306	0.089	1.97735e-55	9	CR45660
CR456681	5.62499e-24	0.264498	0.386	0.201	7.73774e-20	9	CR45668
crb1	4.46836e-70	0.493181	0.417	0.138	6.14667e-66	9	crb
D	3.11774e-238	0.568444	0.568	0.09	4.28877e-234	9	D
Dat1	6.61897e-110	0.614657	0.855	0.366	9.10505e-106	9	Dat
Dg2	2.56853e-26	0.333579	0.733	0.528	3.53327e-22	9	Dg
DIP-theta1	3.9818e-273	1.2158	0.983	0.316	5.47737e-269	9	DIP-theta
disco1	0	1.24267	0.837	0.095	0	9	disco
disco-r1	0	1.16162	0.82	0.074	0	9	disco-r
dlp1	1.28761e-51	0.405882	0.473	0.197	1.77124e-47	9	dlp
dmrt99B1	2.64447e-255	0.449943	0.331	0.029	3.63773e-251	9	dmrt99B
dpr141	8.42088e-34	0.326858	0.921	0.77	1.15838e-29	9	dpr14
dpr152	2.50817e-43	0.366289	0.583	0.295	3.45023e-39	9	dpr15
dpr32	5.04993e-82	0.569693	0.721	0.329	6.94669e-78	9	dpr3
dpr62	1.53805e-49	0.449288	0.847	0.562	2.11574e-45	9	dpr6
dpr93	2.21972e-34	0.323506	0.897	0.659	3.05345e-30	9	dpr9
Dscam23	3.9318e-67	0.38137	1	0.969	5.40859e-63	9	Dscam2
Dtg1	0	1.14481	0.688	0.081	0	9	Dtg
eEF53	3.32027e-58	0.262719	0.981	0.978	4.56737e-54	9	eEF5
Eip78C	5.67369e-62	0.452127	0.955	0.788	7.80473e-58	9	Eip78C
Eip93F2	6.82136e-212	1.15498	0.988	0.5	9.38346e-208	9	Eip93F
Exn	3.05969e-20	0.25133	0.295	0.152	4.20891e-16	9	Exn
eys4	1.79634e-68	0.444184	0.979	0.658	2.47104e-64	9	eys
Fas32	1.88722e-67	0.383665	0.924	0.523	2.59606e-63	9	Fas3
FMRFaR	1.34784e-35	0.278944	0.388	0.169	1.85409e-31	9	FMRFaR
Frq23	2.95644e-24	0.347633	0.88	0.716	4.06687e-20	9	Frq2
futsch	2.14825e-91	0.411014	0.998	0.961	2.95513e-87	9	futsch
fz21	2.69032e-158	0.884082	0.99	0.78	3.70081e-154	9	fz2
Gdh	4.68301e-22	0.250804	0.907	0.768	6.44195e-18	9	Gdh
GFP4	4.9863e-59	0.468315	0.965	0.879	6.85916e-55	9	GFP
glec2	1.44162e-27	0.310482	0.754	0.528	1.9831e-23	9	glec
hid	2.18638e-69	0.332814	0.302	0.076	3.00758e-65	9	hid
Hk1	8.89611e-62	0.428109	0.961	0.823	1.22375e-57	9	Hk
Hr44	2.94081e-60	0.40266	0.986	0.909	4.04538e-56	9	Hr4
Hsp272	1.93346e-29	0.397327	0.771	0.588	2.65967e-25	9	Hsp27
jp	4.89172e-69	0.581786	0.638	0.315	6.72905e-65	9	jp
kek33	3.27576e-104	0.636461	0.833	0.393	4.50614e-100	9	kek3
kek51	1.63866e-36	0.332853	0.599	0.336	2.25414e-32	9	kek5
kek62	1.35281e-28	0.308898	0.665	0.42	1.86093e-24	9	kek6
klar1	2.92941e-93	0.626832	0.946	0.771	4.0297e-89	9	klar
ko1	2.33008e-50	0.30236	0.283	0.085	3.20526e-46	9	ko
Lac	1.16874e-55	0.310751	0.421	0.146	1.60772e-51	9	Lac
Lk6	2.73517e-31	0.302086	0.924	0.808	3.76251e-27	9	Lk6
Mbs1	3.05375e-22	0.290632	0.676	0.492	4.20074e-18	9	Mbs
MRE162	6.98726e-73	0.366121	0.986	0.989	9.61168e-69	9	MRE16
Myo10A	4.15843e-228	0.497597	0.331	0.034	5.72033e-224	9	Myo10A
nAChRalpha72	1.20875e-71	0.404053	0.981	0.769	1.66275e-67	9	nAChRalpha7
Nlg22	8.85336e-20	0.261288	0.878	0.734	1.21787e-15	9	Nlg2
Nop17l	3.83396e-24	0.251931	0.36	0.186	5.27399e-20	9	Nop17l
Pfdn2	1.75923e-21	0.251409	0.802	0.624	2.42e-17	9	Pfdn2
Pxn4	3.13261e-156	0.983861	0.959	0.527	4.30922e-152	9	Pxn
pyd	1.09083e-118	0.822047	0.862	0.44	1.50054e-114	9	pyd
qtc1	1.75274e-35	0.365849	0.783	0.566	2.41107e-31	9	qtc
RASSF81	7.41471e-26	0.282956	0.826	0.66	1.01997e-21	9	RASSF8
rdgA3	3.0312e-128	0.826195	0.983	0.646	4.16971e-124	9	rdgA
Rgk32	4.61507e-63	0.425225	0.717	0.354	6.34849e-59	9	Rgk3
rgn2	2.67498e-216	1.16635	0.938	0.392	3.6797e-212	9	rgn
rho1	4.45421e-40	0.350757	0.502	0.243	6.12722e-36	9	rho
Rim2	3.32495e-45	0.353606	0.986	0.917	4.57381e-41	9	Rim
ringer2	4.32143e-80	0.455493	0.973	0.927	5.94456e-76	9	ringer
RpL23	4.5769e-67	0.287697	0.998	0.985	6.29599e-63	9	RpL23
RpS3A	4.59404e-52	0.259286	0.977	0.975	6.31956e-48	9	RpS3A
scrt1	1.62357e-47	0.356505	0.981	0.911	2.23339e-43	9	scrt
Sema1a2	6.84615e-64	0.401702	0.992	0.949	9.41756e-60	9	Sema1a
Sf3b61	2.19044e-56	0.454568	0.905	0.657	3.01317e-52	9	Sf3b6
Sh3beta	1.13164e-20	0.288987	0.688	0.514	1.55668e-16	9	Sh3beta
shakB3	1.44415e-135	0.531745	1	0.98	1.98657e-131	9	shakB
side1	3.32912e-55	0.40222	0.977	0.739	4.57954e-51	9	side
Sox21b	7.56599e-250	0.586752	0.589	0.091	1.04078e-245	9	Sox21b
SoxN2	4.1685e-193	0.806201	0.921	0.272	5.73418e-189	9	SoxN
[truncated: 16,650 more rows]

## Sheet: 4.FemaleClusterAnnotations
			Homeotics	Sex Hierarchy	Circadian	Mushroom body	Fast Acting Neurotransmitter									Overlap with Croset (Midbrain)
Cluster	Cluster Annotations		segment/parasegment				Acetylcholine	Glutamate	GABA		Monoamines	Histamine	Dopamine	Serotonin	Tyramine and Octopamine	Jaccarad Index Overlap >0.05
0								Vglut	Gad1, VGAT
1	Octopamine_1			fru
2				fru, Sxl
3						sNPF, Fas2
4	y_KCs_1					ey, Dop1R2, trio, sNPF, Fas2	VAChT									ab_KCs, prime_KCs, y_KCs
5	VNC_1		Antp	fru
6							VAChT
7
8				Sxl
9
10				fru
11
12					cry	Dop1R2										Glia_2
13
14						sNPF										Cluster_C
15				fru				Vglut
16																Cluster_A, Ellipsoid_Body, PN1, PN2
17				fru				Vglut
18
19	Ilp7_1						ChAT									Cluster_L
20
21	VNC_2		Antp		Pdp1		VAChT
22	Ellipsoid_Body_1					Fas2			Gad1, VGAT							Ellipsoid_Body
23						Fas2	VAChT, ChAT
24					Pdp1
25					tim				Gad1, VGAT							Cluster_J, Ellipsoid_Body
26	Dopamine_1					Fas2					Vmat		DAT, ple			Dopamine
27	y_KCs_2					ey, Dop1R2, trio, sNPF, Fas2										ab_KCs, prime_KCs, y_KCs
28				fru		Fas2										Cluster_L
29	y_KCs_3*				Pdp1	Dop1R2, trio	VAChT, ChAT									Cluster_A
30	Octopamine_2								Gad1, VGAT
31	Octopamine_3, ab_KCs_1			fru	Pdp1	ey, Dop1R2, Fas2			Gad1, VGAT							Ellipsoid_Body
32							ChAT
33								Vglut								Cluster_I, Cluster_J
34	Octopamine_4			fru	per	Fas2	ChAT
35	Octopamine_5				Pdp1		VAChT, ChAT
36					Pdp1											Ellipsoid_Body
37	ab_KCs_2					Dop1R2, Fas2	VAChT
38	VNC_3		Antp, Abd-B	fru		Fas2			Gad1, VGAT							Cluster_J
39	Tachykinin_1			fru												Cluster_L
40
41					Pdp1	sNPF
42	Tachykinin_2			fru			VAChT, ChAT									Ellipsoid_Body
43	VNC_4		Antp, abd-A, Ubx			Dop1R2			Gad1, VGAT
44								Vglut
45	Octopamine_6				per				Gad1, VGAT							Cluster_I
46
47	Ilp7_2			fru				Vglut
48				fru
49				fru			VAChT, ChAT
50	Tachykinin_3
51						Fas2			Gad1, VGAT							Cluster_I, Cluster_J
52				fru			ChAT
53	Tachykinin_4				Pdp1		VAChT
54
55	VNC_5		Antp, Ubx
56							VAChT, ChAT
57	Camta			fru			VAChT
58						Fas2		Vglut
59							VAChT, ChAT
60						Fas2
61				Sxl
62					Pdp1	sNPF, Fas2			Gad1, VGAT
63	Tachykinin_5, VNC_6		Antp			sNPF
64	Dopamine_2				sgg	Fas2					Vmat		DAT, ple			Ellipsoid_Body, Glia_2
65								Vglut
66				fru	cry		VAChT
67						ey			Gad1, VGAT
68				fru		sNPF	ChAT
69						ey			Gad1, VGAT							Glia_2
70	Serotonin and Octopamine			fru				Vglut						SerT
71
72									Gad1, VGAT
73	Ellipsoid_Body_2				cry				Gad1, VGAT							Ellipsoid_Body
74						Dop1R2	ChAT
75				fru		ey	ChAT
76						sNPF			Gad1, VGAT
77	Octopamine_7				cry			Vglut
78	ab_KCs_3				sgg	ey, Dop1R2,Fas2	VAChT, ChAT
79						ey		Vglut
80					Pdp1		VAChT, ChAT
81	Lgr3 Median Bundle_1								Gad1, VGAT
82					Pdp1	Fas2			Gad1, VGAT
83	Tyramine and Octopamine			fru		Fas2		Vglut							Tdc2	Glia_2
84	ab_KCs_4					ey, Dop1R2, sNPF, Fas2										ab_KCs, prime_KCs, y_KCs
85	Lgr3 Median Bundle_2			fru		sNPF, Fas2		Vglut
86	VNC_7		Antp, Ubx	fru	tim	sNPF			Gad1, VGAT
87

## Sheet: 5.FullDataSetMarkerGenes
	p_val	avg_logFC	pct.1	pct.2	p_val_adj	cluster	gene		Annotation Reference
Ac3	1.32585e-34	0.387554	0.222	0.535	1.8473e-30	0	Ac3
Ac78C	2.02618e-22	0.37493	0.104	0.258	2.82308e-18	0	Ac78C
Act5C	0.00290098	0.273566	0.68	0.924	1	0	Act5C
Alk	1.31911e-37	0.286606	0.347	0.815	1.83792e-33	0	Alk
alpha-Man-IIb	6.66413e-32	0.337695	0.115	0.317	9.28514e-28	0	alpha-Man-IIb
Atpalpha	2.40375e-15	0.427372	0.888	0.995	3.34915e-11	0	Atpalpha
bai	1.01189e-55	0.309766	0.189	0.544	1.40987e-51	0	bai
beat-Ia	6.3459e-12	0.295282	0.253	0.442	8.84174e-08	0	beat-Ia
betaTub56D	1.4961e-34	0.474738	0.783	0.926	2.08451e-30	0	betaTub56D
Blimp-1	8.4414e-23	0.388793	0.149	0.341	1.17614e-18	0	Blimp-1
Btk29A	5.55151e-54	0.272048	0.221	0.605	7.73492e-50	0	Btk29A
CaBP1	1.88497e-16	0.63037	0.263	0.531	2.62633e-12	0	CaBP1
CadN	4.4454e-07	0.525037	0.465	0.875	0.00619377	0	CadN
Calr	7.20358e-09	0.67267	0.586	0.868	0.000100368	0	Calr
Cals	1.13489e-07	0.663004	0.421	0.828	0.00158124	0	Cals
cathD	4.38401e-37	0.507874	0.211	0.523	6.10825e-33	0	cathD
Cbp53E	2.28655e-08	0.306145	0.303	0.482	0.000318586	0	Cbp53E
CdsA	1.20253e-50	0.268976	0.131	0.414	1.67549e-46	0	CdsA
CG10804	7.98295e-34	0.409905	0.143	0.377	1.11226e-29	0	CG10804
CG11155	1.90438e-49	0.316369	0.273	0.705	2.65338e-45	0	CG11155
CG11319	1.74081e-36	0.266418	0.157	0.409	2.42547e-32	0	CG11319
CG1161	4.16708e-44	0.377165	0.195	0.517	5.80599e-40	0	CG1161
CG12213	2.44373e-41	0.422355	0.163	0.443	3.40485e-37	0	CG12213
CG12594	1.18555e-22	0.331581	0.26	0.519	1.65182e-18	0	CG12594
CG1265	1.01367e-40	0.326182	0.127	0.372	1.41234e-36	0	CG1265
CG1371	3.66714e-24	0.424797	0.12	0.295	5.10943e-20	0	CG1371
CG14715	4.11384e-45	0.315137	0.2	0.53	5.73181e-41	0	CG14715
CG14767	1.2455e-45	0.36837	0.218	0.57	1.73535e-41	0	CG14767
CG15765	2.81904e-18	0.550404	0.34	0.653	3.92777e-14	0	CG15765
CG17684	1.68686e-51	0.314869	0.181	0.516	2.3503e-47	0	CG17684
CG17839	5.72778e-32	0.310824	0.129	0.34	7.98052e-28	0	CG17839
CG18467	2.94813e-35	0.269474	0.121	0.34	4.10763e-31	0	CG18467
CG2076	3.50738e-31	0.283935	0.08	0.251	4.88683e-27	0	CG2076
CG2269	2.20492e-21	0.665384	0.321	0.646	3.07212e-17	0	CG2269
CG2918	3.0124e-36	0.331014	0.144	0.388	4.19718e-32	0	CG2918
CG31030	6.29662e-29	0.256494	0.397	0.877	8.77308e-25	0	CG31030
CG31460	2.14147e-48	0.250508	0.119	0.382	2.98371e-44	0	CG31460
CG31522	6.7858e-46	0.263836	0.106	0.349	9.45466e-42	0	CG31522
CG31690	1.87941e-34	0.299577	0.14	0.37	2.61858e-30	0	CG31690
CG31814	5.31587e-10	0.313337	0.21	0.354	7.4066e-06	0	CG31814
CG31998	4.20439e-55	0.278536	0.182	0.528	5.85798e-51	0	CG31998
CG32441	3.73182e-53	0.295056	0.263	0.693	5.19954e-49	0	CG32441
CG33129	2.80987e-39	0.274687	0.333	0.797	3.91499e-35	0	CG33129
CG33303	4.26372e-46	0.352114	0.19	0.514	5.94064e-42	0	CG33303
CG33543	3.11194e-23	0.324845	0.296	0.586	4.33587e-19	0	CG33543
CG3556	3.12844e-53	0.344202	0.178	0.515	4.35886e-49	0	CG3556
CG3655	1.41373e-30	0.289572	0.153	0.377	1.96974e-26	0	CG3655
CG3702	6.05251e-29	0.317459	0.088	0.258	8.43296e-25	0	CG3702
CG3887	4.52374e-48	0.385066	0.216	0.576	6.30292e-44	0	CG3887
CG40178	5.27985e-20	0.275897	0.412	0.88	7.35642e-16	0	CG40178
CG41378	7.87929e-63	0.25904	0.192	0.572	1.09782e-58	0	CG41378
CG42265	4.71787e-34	0.291673	0.335	0.773	6.57341e-30	0	CG42265
CG42346	5.60739e-28	0.353816	0.117	0.304	7.81278e-24	0	CG42346
CG42817	4.00968e-38	0.371553	0.232	0.564	5.58669e-34	0	CG42817
CG4341	5.16751e-34	0.264174	0.137	0.363	7.1999e-30	0	CG4341
CG43737	0.00122874	0.533522	0.485	0.811	1	0	CG43737
CG43795	4.79241e-22	0.37896	0.134	0.307	6.67727e-18	0	CG43795
CG45002	1.73194e-49	0.261107	0.14	0.426	2.41311e-45	0	CG45002
CG4587	4.16929e-05	0.539643	0.594	0.931	0.580908	0	CG4587
CG5282	6.2594e-38	0.383277	0.166	0.436	8.72122e-34	0	CG5282
CG5758	1.96273e-18	0.702079	0.197	0.408	2.73467e-14	0	CG5758
CG6184	3.17055e-35	0.339395	0.102	0.306	4.41753e-31	0	CG6184
CG6495	1.68578e-42	0.259905	0.083	0.296	2.3488e-38	0	CG6495
CG8860	2.95037e-69	0.267648	0.216	0.641	4.11075e-65	0	CG8860
CG9813	1.70271e-22	0.583842	0.174	0.387	2.37238e-18	0	CG9813
CG9919	5.38701e-07	0.365655	0.438	0.816	0.00750573	0	CG9919
CG9953	1.90008e-31	0.329759	0.116	0.316	2.64737e-27	0	CG9953
CHOp24	9.10106e-59	0.297561	0.174	0.523	1.26805e-54	0	CHOp24
Cirl	4.27454e-20	0.346799	0.381	0.812	5.95572e-16	0	Cirl
Cnx99A	8.16225e-42	0.446308	0.249	0.621	1.13725e-37	0	Cnx99A
Cow	2.15297e-49	0.332753	0.296	0.721	2.99973e-45	0	Cow
Cp1	1.21801e-57	0.351061	0.209	0.592	1.69706e-53	0	Cp1
CR45312	6.3927e-26	0.49474	0.212	0.465	8.90695e-22	0	CR45312
CR45332	2.25809e-12	0.56758	0.183	0.346	3.14619e-08	0	CR45332
Dad1	2.24609e-57	0.260545	0.18	0.53	3.12948e-53	0	Dad1
dally	1.40718e-27	0.414218	0.144	0.35	1.96063e-23	0	dally
dati	7.74089e-08	0.536057	0.217	0.368	0.00107854	0	dati
Desat1	1.3832e-46	0.271255	0.111	0.361	1.92722e-42	0	Desat1
DIP-beta	2.01096e-13	0.383729	0.127	0.251	2.80187e-09	0	DIP-beta
DIP-delta	7.31886e-07	0.602394	0.204	0.333	0.0101974	0	DIP-delta
dpr21	3.45499e-14	0.273051	0.43	0.858	4.81384e-10	0	dpr21
Dscam1	8.30268e-49	0.330533	0.311	0.78	1.15681e-44	0	Dscam1
Dscam3	1.86451e-24	0.349345	0.166	0.374	2.59782e-20	0	Dscam3
dtn	7.03461e-62	0.273183	0.248	0.691	9.80132e-58	0	dtn
ed	6.26078e-15	0.513636	0.241	0.46	8.72314e-11	0	ed
eEF1alpha1	1.16661e-84	0.424061	0.213	0.673	1.62544e-80	0	eEF1alpha1
Eip75B	6.365e-21	0.266005	0.348	0.708	8.86835e-17	0	Eip75B
EMC3	5.23873e-48	0.298205	0.153	0.447	7.29913e-44	0	EMC3
Eph	1.18085e-49	0.362997	0.215	0.576	1.64528e-45	0	Eph
ergic53	8.5511e-39	0.446468	0.206	0.522	1.19142e-34	0	ergic53
ERp60	1.60322e-44	0.357652	0.18	0.487	2.23377e-40	0	ERp60
Ext2	3.7629e-32	0.457498	0.137	0.359	5.24285e-28	0	Ext2
eys	3.95932e-39	0.290485	0.291	0.652	5.51652e-35	0	eys
Fas1	9.0733e-44	0.268616	0.101	0.332	1.26418e-39	0	Fas1
Fas2	3.81606e-07	0.55398	0.334	0.541	0.00531692	0	Fas2		Crittenden, J. R., E. M. Skoulakis, K. A. Han, D. Kalderon, and R. L. Davis. “Tripartite Mushroom Body Architecture Revealed by Antigenic Markers.” Learning & Memory (Cold Spring Harbor, N.Y.) 5, no. 1–2 (June 1998): 38–51.
Fer1HCH	5.99669e-14	0.289158	0.418	0.837	8.35519e-10	0	Fer1HCH
Fili	2.78023e-30	0.311968	0.095	0.273	3.8737e-26	0	Fili
fred	1.88643e-07	0.550563	0.325	0.55	0.00262837	0	fred
Fur1	1.57016e-35	0.32762	0.185	0.455	2.18771e-31	0	Fur1
fwe	6.44697e-53	0.301462	0.163	0.485	8.98256e-49	0	fwe
GABA-B-R1	3.24149e-21	0.432331	0.369	0.786	4.51637e-17	0	GABA-B-R1
GCS2alpha	4.94533e-47	0.432129	0.161	0.46	6.89033e-43	0	GCS2alpha
GluRIA	7.04076e-47	0.326733	0.178	0.486	9.80989e-43	0	GluRIA
GluRIB	6.45695e-14	0.467727	0.344	0.631	8.99647e-10	0	GluRIB
Gp93	4.65292e-51	0.350965	0.158	0.467	6.48292e-47	0	Gp93
Hasp	9.28059e-19	0.617865	0.286	0.593	1.29306e-14	0	Hasp
hdc	1.45846e-19	0.337881	0.241	0.469	2.03207e-15	0	hdc
Hsc70-3	1.0774e-26	0.536844	0.304	0.677	1.50114e-22	0	Hsc70-3
Hsp27	2.26538e-21	0.281343	0.31	0.63	3.15635e-17	0	Hsp27
hth	1.62766e-21	0.481768	0.293	0.572	2.26782e-17	0	hth
InR	1.6429e-24	0.506383	0.249	0.542	2.28905e-20	0	InR
kcc	4.61975e-15	0.675963	0.299	0.599	6.43669e-11	0	kcc
kirre	4.02295e-17	0.457541	0.297	0.583	5.60518e-13	0	kirre
klar	5.93785e-51	0.29408	0.316	0.799	8.2732e-47	0	klar
klg	5.82637e-13	0.585923	0.681	0.757	8.11788e-09	0	klg
kug	1.58071e-25	0.487025	0.196	0.437	2.20241e-21	0	kug
kuz	7.94409e-49	0.261706	0.309	0.767	1.10685e-44	0	kuz
Lamp1	3.98706e-25	0.426947	0.34	0.756	5.55517e-21	0	Lamp1
Lar	0.00333046	0.388875	0.518	0.927	1	0	Lar
LpR1	2.92599e-37	0.299097	0.124	0.35	4.07678e-33	0	LpR1
LRP1	4.0271e-38	0.254134	0.131	0.367	5.61096e-34	0	LRP1
Lrp4	4.31099e-24	0.574038	0.209	0.462	6.0065e-20	0	Lrp4
mgl	6.23656e-28	0.404315	0.161	0.382	8.68939e-24	0	mgl
Mp	7.71625e-12	0.548063	0.382	0.691	1.07511e-07	0	Mp
nAChRalpha2	3.64362e-60	0.29141	0.18	0.538	5.07665e-56	0	nAChRalpha2
nAChRalpha6	0.000142047	0.396246	0.45	0.726	1	0	nAChRalpha6
nAChRbeta1	0.00378909	0.346501	0.527	0.939	1	0	nAChRbeta1
nAChRbeta2	4.5698e-40	0.294726	0.317	0.763	6.3671e-36	0	nAChRbeta2
nemy	3.26405e-32	0.307873	0.184	0.444	4.5478e-28	0	nemy
nkd	1.16767e-21	0.397441	0.277	0.575	1.62692e-17	0	nkd
Nmda1	4.97379e-56	0.329325	0.178	0.524	6.92998e-52	0	Nmda1
Nmdar1	1.08702e-32	0.307058	0.101	0.295	1.51455e-28	0	Nmdar1
nolo	2.17718e-13	0.503936	0.279	0.523	3.03346e-09	0	nolo
Nrg	9.52288e-29	0.318594	0.385	0.844	1.32682e-24	0	Nrg
Nrt	1.29257e-58	0.338999	0.25	0.676	1.80094e-54	0	Nrt
nrv3	1.4542e-05	0.414016	0.874	0.996	0.202614	0	nrv3
Nrx-1	2.07209e-08	0.46039	0.428	0.839	0.000288704	0	Nrx-1
Nrx-IV	6.7612e-32	0.258736	0.09	0.271	9.42038e-28	0	Nrx-IV
NUCB1	7.87202e-35	0.467509	0.301	0.708	1.09681e-30	0	NUCB1
Oatp74D	6.64549e-51	0.289402	0.253	0.661	9.25917e-47	0	Oatp74D
Ost48	1.30675e-36	0.388329	0.253	0.609	1.82069e-32	0	Ost48
Pdi	6.45718e-50	0.36797	0.234	0.617	8.99679e-46	0	Pdi
PIG-F	2.65423e-56	0.26202	0.149	0.465	3.69813e-52	0	PIG-F
PIG-T	1.77352e-38	0.362895	0.114	0.34	2.47105e-34	0	PIG-T
PlexA	1.20061e-22	0.550058	0.322	0.698	1.6728e-18	0	PlexA
PlexB	2.66497e-49	0.365425	0.206	0.559	3.7131e-45	0	PlexB
Plod	1.94186e-28	0.407778	0.125	0.323	2.70559e-24	0	Plod
prtp	1.0561e-48	0.38025	0.237	0.624	1.47147e-44	0	prtp
Ptp10D	7.76369e-33	0.384622	0.288	0.658	1.08172e-28	0	Ptp10D
Ptp69D	3.65394e-29	0.45992	0.147	0.364	5.09104e-25	0	Ptp69D
Pvf3	0.000109689	0.398214	0.468	0.68	1	0	Pvf3
Pxn	2.30162e-26	0.482187	0.265	0.567	3.20685e-22	0	Pxn
rgn	8.35489e-34	0.368061	0.174	0.427	1.16409e-29	0	rgn
robo1	7.89284e-34	0.375958	0.13	0.352	1.09971e-29	0	robo1
Roc1a	4.25695e-35	0.317975	0.292	0.689	5.93121e-31	0	Roc1a
roX1	1.59521e-08	0.429289	0.379	0.305	0.000222261	0	roX1
Rtnl1	3.47907e-13	0.342393	0.729	0.971	4.84739e-09	0	Rtnl1
Sap-r	2.973e-37	0.354204	0.107	0.323	4.14228e-33	0	Sap-r
Sc2	7.81225e-42	0.326426	0.113	0.35	1.08848e-37	0	Sc2
Scgalpha	6.21677e-38	0.414609	0.23	0.565	8.66183e-34	0	Scgalpha
schlank	5.17912e-31	0.49063	0.309	0.714	7.21606e-27	0	schlank
Sec61alpha	3.67404e-45	0.32615	0.157	0.445	5.11905e-41	0	Sec61alpha
Sema2a	2.78366e-55	0.276765	0.157	0.48	3.87847e-51	0	Sema2a
Sema2b	3.11231e-29	0.372027	0.27	0.59	4.33638e-25	0	Sema2b
SKIP	8.61913e-41	0.335253	0.229	0.561	1.2009e-36	0	SKIP
sli	2.96349e-41	0.346968	0.144	0.405	4.12903e-37	0	sli
SP2353	3.8486e-49	0.35497	0.27	0.686	5.36226e-45	0	SP2353
Spase22-23	4.71911e-52	0.286874	0.155	0.465	6.57513e-48	0	Spase22-23
Stt3A	3.6195e-28	0.379144	0.107	0.287	5.04304e-24	0	Stt3A
Stt3B	9.00897e-35	0.312924	0.097	0.295	1.25522e-30	0	Stt3B
Tace	1.42762e-28	0.422761	0.132	0.335	1.98911e-24	0	Tace
Tango1	3.26346e-28	0.333506	0.096	0.269	4.54698e-24	0	Tango1
Tango5	4.5098e-40	0.275041	0.105	0.327	6.28351e-36	0	Tango5
TM4SF	5.39109e-31	0.292636	0.262	0.593	7.51141e-27	0	TM4SF
TM9SF2	5.2735e-33	0.36296	0.102	0.297	7.34756e-29	0	TM9SF2
TMS1	1.27314e-32	0.467342	0.275	0.64	1.77387e-28	0	TMS1
Toll-6	4.12427e-40	0.286837	0.308	0.709	5.74634e-36	0	Toll-6
Tpi	6.78166e-43	0.301739	0.171	0.463	9.44889e-39	0	Tpi
trn	8.78865e-33	0.262904	0.217	0.496	1.22452e-28	0	trn
Trp1	6.70623e-44	0.278074	0.325	0.803	9.34379e-40	0	Trp1
Tsp42Ee	5.8349e-45	0.254966	0.119	0.37	8.12976e-41	0	Tsp42Ee
Tsp97E	2.06204e-60	0.276756	0.174	0.526	2.87305e-56	0	Tsp97E
unc79	1.11047e-37	0.370775	0.269	0.65	1.54722e-33	0	unc79
Vha100-1	2.56161e-51	0.33972	0.247	0.652	3.56909e-47	0	Vha100-1
wry	1.61452e-24	0.457896	0.31	0.648	2.24952e-20	0	wry
14-3-3zeta	0	1.68766	1	0.978	0	1	14-3-3zeta
18w	2.03308e-20	0.347817	0.262	0.168	2.83269e-16	1	18w
2mit	1.36799e-61	0.53042	0.534	0.347	1.90603e-57	1	2mit
5PtaseI	9.29381e-09	0.268775	0.399	0.388	0.000129491	1	5PtaseI
7B2	2.10538e-109	0.366087	0.971	0.908	2.93342e-105	1	7B2
ab	0	2.23796	0.996	0.433	0	1	ab
Ac78C1	7.76011e-91	0.554372	0.497	0.242	1.08122e-86	1	Ac78C
akirin	1.37922e-12	0.261194	0.563	0.573	1.92167e-08	1	akirin
amon	3.28925e-285	1.11507	0.821	0.423	4.58291e-281	1	amon
AP-1sigma	1.78316e-23	0.260622	0.723	0.735	2.48447e-19	1	AP-1sigma
AP-2sigma	2.649e-27	0.259517	0.792	0.758	3.69085e-23	1	AP-2sigma
aPKC	6.45556e-66	0.572944	0.586	0.445	8.99453e-62	1	aPKC
Aplip1	4.24494e-09	0.271864	0.501	0.532	5.91448e-05	1	Aplip1
Appl	0	0.828681	0.991	0.918	0	1	Appl
ari-1	2.17907e-06	0.268416	0.336	0.321	0.030361	1	ari-1
Asator	2.63062e-09	0.283663	0.465	0.472	3.66524e-05	1	Asator
Atg8a	6.09823e-60	0.33552	0.922	0.863	8.49667e-56	1	Atg8a
Bacc	1.10784e-142	0.403741	0.996	0.987	1.54355e-138	1	Bacc
bic	9.22751e-48	0.388359	0.767	0.713	1.28567e-43	1	bic
bma	0	1.11887	0.712	0.235	0	1	bma
brp	1.24753e-172	0.588504	0.968	0.896	1.73818e-168	1	brp
bru1	1.32272e-76	0.536598	0.524	0.293	1.84295e-72	1	bru1
bru3	1.56441e-109	0.395615	0.988	0.795	2.17968e-105	1	bru3
btsz	3.43362e-54	0.467962	0.307	0.145	4.78407e-50	1	btsz
bun	7.34981e-153	0.580754	0.946	0.886	1.02405e-148	1	bun
Bx	4.69584e-305	0.916329	0.939	0.405	6.54271e-301	1	Bx
Ca-alpha1D	3.03919e-26	0.301569	0.659	0.648	4.2345e-22	1	Ca-alpha1D
Ca-beta	8.23494e-16	0.352169	0.486	0.474	1.14737e-11	1	Ca-beta
cact	1.78672e-115	0.77936	0.58	0.339	2.48944e-111	1	cact
Calx	1.47528e-147	0.696657	0.837	0.613	2.05551e-143	1	Calx
CanB	0	0.862792	0.987	0.918	0	1	CanB
CCKLR-17D3	3.31248e-30	0.344229	0.425	0.289	4.61528e-26	1	CCKLR-17D3
CD98hc	1.24124e-08	0.295241	0.363	0.343	0.000172942	1	CD98hc
cg	2.74058e-32	0.308548	0.727	0.695	3.81845e-28	1	cg
CG10019	6.67122e-109	0.692973	0.587	0.335	9.29502e-105	1	CG10019
CG10132	3.87073e-21	0.384936	0.385	0.309	5.39309e-17	1	CG10132
CG10508	0.00024075	0.259743	0.35	0.36	1	1	CG10508
CG10543	1.76558e-69	0.479217	0.739	0.638	2.45998e-65	1	CG10543
CG10738	1.65942e-282	0.717991	0.331	0.051	2.31207e-278	1	CG10738
CG10947	0	1.34598	0.703	0.135	0	1	CG10947
CG11221	9.67815e-87	0.688846	0.383	0.165	1.34846e-82	1	CG11221
CG11537	1.11945e-62	0.563874	0.385	0.209	1.55973e-58	1	CG11537
CG11768	9.42399e-55	0.478991	0.36	0.184	1.31304e-50	1	CG11768
CG11835	0	1.31254	0.547	0.003	0	1	CG11835
CG12194	3.77674e-41	0.464598	0.419	0.285	5.26214e-37	1	CG12194
CG12531	1.25174e-46	0.489281	0.537	0.409	1.74405e-42	1	CG12531
CG13739	7.43825e-237	0.955496	0.755	0.326	1.03637e-232	1	CG13739
CG13921	2.66741e-115	0.711372	0.474	0.214	3.7165e-111	1	CG13921
CG13954	1.71398e-98	0.674648	0.527	0.285	2.38808e-94	1	CG13954
CG14186	1.82125e-08	0.276135	0.506	0.495	0.000253755	1	CG14186
CG14408	2.87049e-11	0.300165	0.366	0.332	3.99946e-07	1	CG14408
CG14442	7.9092e-18	0.364398	0.461	0.416	1.10199e-13	1	CG14442
CG14478	2.806e-27	0.340829	0.635	0.608	3.9096e-23	1	CG14478
CG14669	5.69582e-35	0.441891	0.474	0.363	7.93598e-31	1	CG14669
CG14762	1.01752e-21	0.26591	0.614	0.524	1.41771e-17	1	CG14762
CG14853	1.74666e-09	0.280694	0.287	0.235	2.43362e-05	1	CG14853
CG14982	3.51099e-10	0.30773	0.252	0.2	4.89186e-06	1	CG14982
CG15309	7.65535e-15	0.328256	0.425	0.386	1.06662e-10	1	CG15309
CG16711	2.3069e-34	0.406905	0.541	0.456	3.21421e-30	1	CG16711
CG17272	6.29027e-94	0.631431	0.623	0.428	8.76423e-90	1	CG17272
CG1737	4.09337e-25	0.399645	0.377	0.278	5.70329e-21	1	CG1737
CG17514	6.60163e-61	0.402387	0.807	0.76	9.19805e-57	1	CG17514
CG17765	7.44758e-10	0.29733	0.315	0.272	1.03767e-05	1	CG17765
CG17778	7.8783e-248	1.23687	0.838	0.516	1.09768e-243	1	CG17778
CG18208	3.57471e-100	0.452466	0.883	0.593	4.98065e-96	1	CG18208
CG18812	2.30175e-36	0.420104	0.648	0.596	3.20703e-32	1	CG18812
CG22691	6.21522e-70	0.282876	0.803	0.625	8.65966e-66	1	CG2269
CG30015	7.75913e-25	0.351766	0.263	0.157	1.08108e-20	1	CG30015
CG30116	1.21251e-98	0.568836	0.766	0.548	1.68939e-94	1	CG30116
CG30158	3.50616e-238	0.942407	0.651	0.246	4.88513e-234	1	CG30158
CG30389	7.44776e-29	0.441449	0.462	0.378	1.0377e-24	1	CG30389
CG31140	8.50133e-177	0.714075	0.915	0.763	1.18449e-172	1	CG31140
CG31191	2.04614e-283	0.970561	0.623	0.199	2.85088e-279	1	CG31191
CG31635	8.86878e-06	0.262223	0.361	0.361	0.123569	1	CG31635
CG31808	4.24105e-82	0.576486	0.36	0.159	5.90905e-78	1	CG31808
CG31997	0	1.63955	0.746	0.11	0	1	CG31997
CG32066	4.75183e-65	0.584869	0.582	0.429	6.62073e-61	1	CG32066
CG32085	2.8806e-35	0.441788	0.287	0.161	4.01354e-31	1	CG32085
CG32204	6.60934e-200	0.925703	0.656	0.289	9.20879e-196	1	CG32204
CG32432	3.18921e-30	0.393967	0.383	0.259	4.44353e-26	1	CG32432
CG32506	7.29512e-73	0.548451	0.642	0.457	1.01643e-68	1	CG32506
CG32647	1.44873e-263	1.13958	0.766	0.389	2.01852e-259	1	CG32647
CG32700	0	2.20327	0.978	0.275	0	1	CG32700
CG32758	4.73992e-11	0.320373	0.403	0.375	6.60413e-07	1	CG32758
CG32767	1.51883e-23	0.253448	0.806	0.809	2.11619e-19	1	CG32767
CG33993	7.29076e-225	0.704405	0.355	0.073	1.01582e-220	1	CG33993
CG34114	5.51998e-154	0.673904	0.894	0.679	7.69099e-150	1	CG34114
CG34357	1.20938e-33	0.437964	0.327	0.202	1.68504e-29	1	CG34357
CG34370	6.72951e-14	0.314626	0.353	0.286	9.37622e-10	1	CG34370
CG34402	0	2.5838	0.952	0.022	0	1	CG34402
CG3530	2.5394e-26	0.41841	0.338	0.236	3.53815e-22	1	CG3530
CG42258	5.77461e-13	0.33561	0.436	0.413	8.04576e-09	1	CG42258
CG42260	1.53637e-167	0.707334	0.932	0.773	2.14062e-163	1	CG42260
CG42324	2.95756e-10	0.270714	0.409	0.374	4.12077e-06	1	CG42324
CG42392	8.50266e-27	0.385793	0.311	0.2	1.18468e-22	1	CG42392
CG42402	0	1.29121	0.985	0.686	0	1	CG42402
CG42541	2.4607e-240	0.866908	0.98	0.808	3.4285e-236	1	CG42541
CG42748	4.87681e-12	0.25055	0.557	0.574	6.79486e-08	1	CG42748
CG42788	4.13384e-89	0.674587	0.439	0.217	5.75967e-85	1	CG42788
CG4297	1.39458e-38	0.44793	0.306	0.169	1.94306e-34	1	CG4297
CG43324	0	1.83203	0.998	0.667	0	1	CG43324
CG44774	2.7585e-56	0.396082	0.813	0.775	3.84342e-52	1	CG44774
CG45263	1.57681e-171	0.59687	0.972	0.652	2.19697e-167	1	CG45263
CG4660	2.47098e-10	0.332039	0.265	0.214	3.44281e-06	1	CG4660
CG5065	7.84037e-13	0.270939	0.589	0.607	1.0924e-08	1	CG5065
CG5830	3.31943e-155	0.93974	0.537	0.233	4.62496e-151	1	CG5830
CG6700	1.10555e-15	0.255729	0.625	0.638	1.54036e-11	1	CG6700
CG7646	4.83319e-201	0.635505	0.977	0.893	6.73408e-197	1	CG7646
CG7985	3.07733e-32	0.381102	0.436	0.313	4.28765e-28	1	CG7985
CG8188	5.30657e-10	0.279477	0.391	0.365	7.39364e-06	1	CG8188
CG8726	1.15581e-25	0.384453	0.486	0.414	1.61038e-21	1	CG8726
CG8910	1.21503e-71	0.606629	0.508	0.307	1.69291e-67	1	CG8910
CG9368	5.71693e-110	0.662752	0.704	0.482	7.9654e-106	1	CG9368
CG9391	0.00087961	0.254293	0.298	0.303	1	1	CG9391
CG98131	3.74807e-76	0.600839	0.557	0.371	5.22219e-72	1	CG9813
chn	3.96297e-37	0.307503	0.837	0.812	5.5216e-33	1	chn
Cip4	3.8176e-51	0.568974	0.532	0.414	5.31907e-47	1	Cip4
Cka	1.06919e-15	0.289324	0.591	0.598	1.48971e-11	1	Cka
ckn	3.41608e-43	0.463234	0.538	0.428	4.75962e-39	1	ckn
Cks85A	5.57664e-15	0.334911	0.275	0.207	7.76993e-11	1	Cks85A
CLIP-190	6.7321e-26	0.284915	0.736	0.75	9.37984e-22	1	CLIP-190
Cngl	0	1.06252	0.994	0.822	0	1	Cngl
comm	3.32119e-120	0.726843	0.438	0.181	4.62741e-116	1	comm
cora	0	1.45074	0.847	0.317	0	1	cora
Cpr65Ea	0	1.07418	0.443	0.009	0	1	Cpr65Ea
cpx	1.1535e-242	0.621412	0.99	0.953	1.60718e-238	1	cpx
CR46006	4.62057e-39	0.410414	0.354	0.198	6.43785e-35	1	CR46006
ctp	5.16393e-123	0.377613	0.993	0.938	7.19491e-119	1	ctp
cv-c	0	1.42628	0.67	0.046	0	1	cv-c
CycG	5.23453e-135	0.55458	0.931	0.868	7.29328e-131	1	CycG
CycT	3.53656e-23	0.396641	0.436	0.361	4.92749e-19	1	CycT
Cyt-c-p	2.02331e-71	0.415952	0.916	0.782	2.81908e-67	1	Cyt-c-p
da	1.30298e-11	0.303023	0.443	0.427	1.81544e-07	1	da
dac	0	1.3472	0.63	0.042	0	1	dac		Kurusu, M., T. Nagao, U. Walldorf, S. Flister, W. J. Gehring, and K. Furukubo-Tokunaga. “Genetic Control of Development of the Mushroom Bodies, the Associative Learning Centers in the Drosophila Brain, by the Eyeless, Twin of Eyeless, and Dachshund Genes.” Proceedings of the National Academy of Sciences of the United States of America 97, no. 5 (February 29, 2000): 2140–44. https://doi.org/10.107…
danr	9.89592e-189	0.760214	0.425	0.122	1.3788e-184	1	danr
Dg	8.16501e-29	0.3437	0.581	0.519	1.13763e-24	1	Dg
Dif	0	0.842011	0.387	0.026	0	1	Dif
dikar	1.79578e-21	0.381895	0.44	0.369	2.50207e-17	1	dikar
Dl	3.46759e-122	0.588916	0.275	0.072	4.83139e-118	1	Dl
dlg1	7.67858e-200	0.5897	0.97	0.925	1.06986e-195	1	dlg1
Dmtn	1.96198e-33	0.444151	0.493	0.389	2.73363e-29	1	Dmtn
dnc	0	0.890955	0.985	0.913	0	1	dnc
Dop1R1	0	1.58059	0.924	0.438	0	1	Dop1R1
Dop1R2	0	1.19184	0.707	0.172	0	1	Dop1R2		Han, Kyung-An, Neil S Millar, Michael S Grotewiel, and Ronald L Davis. “DAMB, a Novel Dopamine Receptor Expressed Specifically in Drosophila Mushroom Bodies.” Neuron 16, no. 6 (June 1, 1996): 1127–35. https://doi.org/10.1016/S0896-6273(00)80139-7.
Dop2R	1.67006e-230	0.908079	0.876	0.535	2.3269e-226	1	Dop2R
DopEcR	4.50861e-124	0.607393	0.911	0.813	6.28185e-120	1	DopEcR
dpr10	1.20449e-149	0.702437	0.696	0.361	1.67821e-145	1	dpr10
dpr12	1.45539e-155	0.637999	0.912	0.722	2.02779e-151	1	dpr12
dpr8	8.96899e-130	0.535149	0.937	0.789	1.24965e-125	1	dpr8
dpr9	4.52474e-60	0.390846	0.812	0.637	6.30432e-56	1	dpr9
Drep2	3.3379e-82	0.410537	0.913	0.873	4.6507e-78	1	Drep2
Dsp1	3.57745e-59	0.358698	0.88	0.851	4.98446e-55	1	Dsp1
Dyb	5.38376e-71	0.591731	0.598	0.435	7.5012e-67	1	Dyb
dysc	0	1.01773	0.991	0.938	0	1	dysc
ed1	2.3996e-52	0.331262	0.647	0.442	3.34336e-48	1	ed
eIF3e	1.14247e-14	0.26827	0.579	0.586	1.5918e-10	1	eIF3e
Elk	1.1861e-247	0.763017	0.375	0.076	1.65259e-243	1	Elk
emc	1.20007e-31	0.300923	0.772	0.677	1.67205e-27	1	emc
enc	3.96366e-15	0.278373	0.597	0.597	5.52257e-11	1	enc
Ent3	1.02057e-05	0.267648	0.319	0.31	0.142196	1	Ent3
ey	0	1.45925	0.694	0.029	0	1	ey		Kurusu, M., T. Nagao, U. Walldorf, S. Flister, W. J. Gehring, and K. Furukubo-Tokunaga. “Genetic Control of Development of the Mushroom Bodies, the Associative Learning Centers in the Drosophila Brain, by the Eyeless, Twin of Eyeless, and Dachshund Genes.” Proceedings of the National Academy of Sciences of the United States of America 97, no. 5 (February 29, 2000): 2140–44. https://doi.org/10.107…
eys1	2.15369e-72	0.34806	0.861	0.627	3.00073e-68	1	eys
Fas21	0	1.49338	0.988	0.514	0	1	Fas2		Crittenden, J. R., E. M. Skoulakis, K. A. Han, D. Kalderon, and R. L. Davis. “Tripartite Mushroom Body Architecture Revealed by Antigenic Markers.” Learning & Memory (Cold Spring Harbor, N.Y.) 5, no. 1–2 (June 1998): 38–51.
fend	9.11226e-196	0.837926	0.87	0.627	1.26961e-191	1	fend
Flo1	1.92476e-19	0.311982	0.541	0.494	2.68177e-15	1	Flo1
fok	5.57756e-100	0.66778	0.719	0.562	7.77121e-96	1	fok
FoxP	5.60638e-50	0.474683	0.648	0.557	7.81137e-46	1	FoxP
fs(1)h	1.73706e-53	0.298065	0.925	0.911	2.42024e-49	1	fs(1)h
fwe1	1.03678e-09	0.251065	0.474	0.47	1.44454e-05	1	fwe
fz	9.64329e-89	0.477443	0.745	0.524	1.3436e-84	1	fz
Galphas	1.81167e-19	0.285671	0.661	0.674	2.5242e-15	1	Galphas
GFP	2.76692e-287	1.16716	0.947	0.835	3.85515e-283	1	GFP
Gfrl	3.00903e-294	0.966821	0.961	0.735	4.19248e-290	1	Gfrl
gish	2.95168e-146	0.521271	0.958	0.915	4.11258e-142	1	gish
GlcAT-P	1.4501e-31	0.389941	0.496	0.384	2.02043e-27	1	GlcAT-P
GluRIA1	5.79713e-163	0.758827	0.772	0.46	8.07714e-159	1	GluRIA
GluRIB1	9.71931e-242	0.889189	0.938	0.606	1.35419e-237	1	GluRIB
Glut4EF	0	1.01086	0.967	0.804	0	1	Glut4EF
gprs	9.2091e-169	0.814281	0.483	0.177	1.2831e-164	1	gprs
Graf	2.45513e-10	0.275747	0.427	0.412	3.42073e-06	1	Graf
GstD11	0	0.750446	0.283	0.01	0	1	GstD11
Gug	5.46587e-35	0.298184	0.784	0.763	7.6156e-31	1	Gug
Gycbeta100B	7.55806e-18	0.343627	0.364	0.284	1.05306e-13	1	Gycbeta100B
HDAC4	1.06021e-135	0.784004	0.706	0.474	1.47719e-131	1	HDAC4
Hr3	1.56524e-14	0.252935	0.638	0.643	2.18084e-10	1	Hr3
Hr38	3.35574e-150	0.827786	0.815	0.509	4.67555e-146	1	Hr38
Hr51	0	1.12302	0.532	0.044	0	1	Hr51
Imp	0	1.53263	0.903	0.161	0	1	Imp
Ip259	3.18953e-47	0.376282	0.804	0.749	4.44397e-43	1	Ip259
jdp	0	3.45029	1	0.526	0	1	jdp
jef	8.52711e-37	0.468416	0.449	0.335	1.18808e-32	1	jef
jing	4.67131e-13	0.31715	0.33	0.271	6.50854e-09	1	jing
kek1	2.71707e-42	0.269256	0.902	0.802	3.7857e-38	1	kek1
kek3	6.7389e-50	0.443862	0.553	0.378	9.3893e-46	1	kek3
kuz1	4.73961e-27	0.276561	0.781	0.745	6.6037e-23	1	kuz
lap	9.49581e-16	0.344058	0.49	0.472	1.32305e-11	1	lap
larp	1.88725e-40	0.421366	0.659	0.594	2.62951e-36	1	larp
Lis-1	6.05921e-55	0.502058	0.705	0.637	8.44229e-51	1	Lis-1
Lrch	9.96204e-31	0.428969	0.447	0.346	1.38801e-26	1	Lrch
lute	9.58538e-30	0.378098	0.272	0.156	1.33553e-25	1	lute
lwr	2.17248e-22	0.288243	0.661	0.658	3.02691e-18	1	lwr
Magi	1.44092e-44	0.405576	0.286	0.139	2.00764e-40	1	Magi
Mef2	0	1.92992	0.888	0.144	0	1	Mef2		Schulz, R. A., C. Chromey, M. F. Lu, B. Zhao, and E. N. Olson. “Expression of the D-MEF2 Transcription in the Drosophila Brain Suggests a Role in Neuronal Cell Differentiation.” Oncogene 12, no. 8 (April 18, 1996): 1827–31.
metro	2.40192e-74	0.661116	0.406	0.212	3.3466e-70	1	metro
mgl1	4.34233e-40	0.398734	0.512	0.366	6.05016e-36	1	mgl
mGluR	9.96313e-101	0.638631	0.583	0.32	1.38816e-96	1	mGluR
Mical	2.29847e-43	0.487117	0.457	0.319	3.20245e-39	1	Mical
mim	1.92542e-31	0.478863	0.416	0.314	2.68269e-27	1	mim
mld	4.18271e-40	0.460391	0.271	0.14	5.82777e-36	1	mld
Mob2	5.95947e-22	0.357511	0.527	0.486	8.30333e-18	1	Mob2
Mp1	1.24155e-68	0.271936	0.899	0.669	1.72985e-64	1	Mp
MRE16	1.00672e-108	0.385028	0.992	0.978	1.40267e-104	1	MRE16
mspo	6.6555e-173	0.712587	0.91	0.67	9.27311e-169	1	mspo
mtd	7.1199e-57	0.533625	0.609	0.483	9.92016e-53	1	mtd
mub	0	1.55156	0.998	0.921	0	1	mub		Grams, Rudi, and Günter Korge. “The Mub Gene Encodes a Protein Containing Three KH Domains and Is Expressed in the Mushroom Bodies of Drosophila Melanogaster.” Gene 215, no. 1 (July 17, 1998): 191–201. https://doi.org/10.1016/S0378-1119(98)00251-0.
Nacalpha	8.89046e-68	0.305924	0.968	0.938	1.23871e-63	1	Nacalpha
nAChRalpha61	8.66767e-94	0.380103	0.927	0.706	1.20767e-89	1	nAChRalpha6
nAChRbeta11	1.97773e-75	0.323007	0.944	0.919	2.75557e-71	1	nAChRbeta1
NaCP60E	9.47104e-36	0.253606	0.91	0.87	1.3196e-31	1	NaCP60E
Ncoa6	1.39524e-33	0.391698	0.55	0.46	1.94399e-29	1	Ncoa6
Ndae1	2.61449e-46	0.43752	0.617	0.516	3.64277e-42	1	Ndae1
Ndfip	5.15092e-08	0.263201	0.273	0.234	0.000717678	1	Ndfip
Nep1	0	0.819258	0.381	0.038	0	1	Nep1
neur	5.2489e-198	0.696649	0.319	0.066	7.31329e-194	1	neur
NFAT	1.58173e-86	0.614313	0.541	0.324	2.20383e-82	1	NFAT
NfI	6.44239e-17	0.33912	0.34	0.265	8.97619e-13	1	NfI
Nlg3	1.20326e-304	0.834682	0.988	0.886	1.6765e-300	1	Nlg3
noe	1.12897e-128	0.273471	1	1	1.57299e-124	1	noe
norpA	2.65969e-117	0.719338	0.746	0.554	3.70575e-113	1	norpA
numb	4.78411e-23	0.405427	0.471	0.407	6.6657e-19	1	numb
Oamb	3.61169e-27	0.313546	0.286	0.168	5.03217e-23	1	Oamb		Han, K. A., N. S. Millar, and R. L. Davis. “A Novel Octopamine Receptor with Preferential Expression in Drosophila Mushroom Bodies.” The Journal of Neuroscience: The Official Journal of the Society for Neuroscience 18, no. 10 (May 15, 1998): 3650–58.
Octbeta1R	0	1.24388	0.755	0.235	0	1	Octbeta1R
olf413	0	1.22512	0.966	0.647	0	1	olf413
pAbp	7.12516e-89	0.367038	0.967	0.932	9.92748e-85	1	pAbp
pcs	1.80905e-14	0.346952	0.449	0.423	2.52055e-10	1	pcs
Pde1c	7.86028e-297	1.06152	0.855	0.426	1.09517e-292	1	Pde1c
Pdk1	6.17547e-25	0.39423	0.413	0.32	8.60429e-21	1	Pdk1
pgant2	1.2424e-48	0.418351	0.572	0.402	1.73104e-44	1	pgant2
PH4alphaNE1	0	0.832635	0.322	0.003	0	1	PH4alphaNE1
phyl	4.11695e-23	0.341589	0.552	0.489	5.73614e-19	1	phyl
Pitslre	6.33058e-53	0.465293	0.686	0.601	8.82039e-49	1	Pitslre
Pka-C1	0	2.12744	0.999	0.888	0	1	Pka-C1		Crittenden, J. R., E. M. Skoulakis, K. A. Han, D. Kalderon, and R. L. Davis. “Tripartite Mushroom Body Architecture Revealed by Antigenic Markers.” Learning & Memory (Cold Spring Harbor, N.Y.) 5, no. 1–2 (June 1998): 38–51.
Pka-C3	0	2.3878	0.936	0.045	0	1	Pka-C3
Pka-R1	0	1.31916	0.913	0.463	0	1	Pka-R1
Pka-R2	0	2.60238	0.998	0.712	0	1	Pka-R2		Crittenden, J. R., E. M. Skoulakis, K. A. Han, D. Kalderon, and R. L. Davis. “Tripartite Mushroom Body Architecture Revealed by Antigenic Markers.” Learning & Memory (Cold Spring Harbor, N.Y.) 5, no. 1–2 (June 1998): 38–51.
Pkc53E	0	1.89112	0.972	0.457	0	1	Pkc53E
Pkc98E	3.87721e-162	0.731025	0.857	0.695	5.40211e-158	1	Pkc98E
Pp2A-29B	1.72363e-18	0.291969	0.572	0.558	2.40153e-14	1	Pp2A-29B
PPP1R15	4.92217e-08	0.253189	0.262	0.221	0.000685806	1	PPP1R15
prt	0	1.77489	0.755	0.016	0	1	prt		Brooks, Elizabeth S., Christina L. Greer, Rafael Romero-Calderón, Christine N. Serway, Anna Grygoruk, Jasmine M. Haimovitz, Bac T. Nguyen, et al. “A Putative Vesicular Transporter Expressed in Drosophila Mushroom Bodies That Mediates Sexual Behavior May Define a Neurotransmitter System.” Neuron 72, no. 2 (October 20, 2011): 316–29. https://doi.org/10.1016/j.neuron.2011.08.032.
puc	4.82116e-49	0.469396	0.573	0.405	6.71732e-45	1	puc
Pur-alpha	7.42903e-14	0.29729	0.538	0.532	1.03509e-09	1	Pur-alpha
PVRAP	3.70047e-187	0.798735	0.591	0.227	5.15586e-183	1	PVRAP
Rab14	1.84382e-19	0.256464	0.67	0.67	2.569e-15	1	Rab14
Rab27	1.988e-181	0.798527	0.386	0.106	2.76989e-177	1	Rab27
Rab3	5.98946e-18	0.301604	0.602	0.594	8.34511e-14	1	Rab3
rad	0	1.9844	0.999	0.599	0	1	rad
raw	3.91469e-07	0.281725	0.292	0.262	0.00545434	1	raw
Rbp	2.35679e-266	0.945836	0.922	0.72	3.28371e-262	1	Rbp
rdgB	1.67918e-67	0.599746	0.484	0.3	2.3396e-63	1	rdgB
rdgC	2.23395e-103	0.579706	0.277	0.084	3.11257e-99	1	rdgC
Rdh	1.29072e-43	0.441232	0.675	0.627	1.79836e-39	1	Rdh
rdx	1.95644e-16	0.300018	0.585	0.584	2.72591e-12	1	rdx
REPTOR-BP	0.000221111	0.254005	0.341	0.352	1	1	REPTOR-BP
Rgk1	0	1.5682	0.963	0.525	0	1	Rgk1		Murakami, Satoshi, Maki Minami-Ohtsubo, Ryuichiro Nakato, Katsuhiko Shirahige, and Tetsuya Tabata. “Two Components of Aversive Memory in Drosophila, Anesthesia-Sensitive and Anesthesia-Resistant Memory, Require Distinct Domains within the Rgk1 Small GTPase.” Journal of Neuroscience, April 17, 2017, 3648–16. https://doi.org/10.1523/JNEUROSCI.3648-16.2017.
Rgk3	0	1.55236	0.887	0.344	0	1	Rgk3
Rgl	7.84137e-51	0.529725	0.466	0.311	1.09254e-46	1	Rgl
RhoGAP93B	1.18032e-08	0.263086	0.414	0.405	0.000164454	1	RhoGAP93B
RhoGDI	7.08208e-18	0.265636	0.638	0.651	9.86746e-14	1	RhoGDI
Ric	2.88463e-139	0.690465	0.826	0.655	4.01915e-135	1	Ric
Rim	8.03917e-128	0.489304	0.967	0.899	1.1201e-123	1	Rim
ringer	2.5529e-64	0.329126	0.953	0.916	3.55695e-60	1	ringer
robl	1.19915e-18	0.291313	0.578	0.559	1.67078e-14	1	robl
RpL15	1.62647e-108	0.305873	0.991	0.975	2.26616e-104	1	RpL15
RpS6	1.50641e-123	0.367337	0.986	0.956	2.09889e-119	1	RpS6
RSG7	8.61873e-46	0.474873	0.611	0.521	1.20085e-41	1	RSG7
rudhira	1.56445e-19	0.282696	0.683	0.695	2.17975e-15	1	rudhira
rut	0	1.97007	0.968	0.405	0	1	rut
scrib	3.64494e-167	0.849019	0.604	0.287	5.0785e-163	1	scrib
scyl	1.4956e-227	0.825675	0.947	0.761	2.08383e-223	1	scyl
sdt	4.628e-148	0.595712	0.932	0.815	6.4482e-144	1	sdt
Shawl	2.72283e-128	0.717538	0.651	0.372	3.79372e-124	1	Shawl
shi	2.4198e-92	0.446644	0.932	0.873	3.3715e-88	1	shi
sick	2.3126e-37	0.453358	0.418	0.285	3.22215e-33	1	sick
sima	1.44727e-19	0.316959	0.579	0.555	2.01647e-15	1	sima
Sin3A	5.07069e-09	0.266919	0.48	0.494	7.06499e-05	1	Sin3A
SkpA	1.58253e-43	0.299978	0.893	0.873	2.20493e-39	1	SkpA
slo	8.12456e-100	0.378199	0.98	0.942	1.13199e-95	1	slo
SLO2	1.37476e-35	0.352919	0.535	0.396	1.91546e-31	1	SLO2
Slob	1.41506e-163	0.828611	0.745	0.469	1.9716e-159	1	Slob
Smg5	1.62641e-08	0.284355	0.354	0.326	0.000226608	1	Smg5
Smox	7.41812e-78	0.618157	0.554	0.355	1.03357e-73	1	Smox
Snap24	6.4926e-37	0.473419	0.441	0.324	9.04614e-33	1	Snap24
sNPF	0	1.73857	0.936	0.153	0	1	sNPF		Johard, Helena A. D., Lina E. Enell, Elisabeth Gustafsson, Pierre Trifilieff, Jan A. Veenstra, and Dick R. Nässel. “Intrinsic Neurons of Drosophila Mushroom Bodies Express Short Neuropeptide F: Relations to Extrinsic Neurons Expressing Different Neurotransmitters.” The Journal of Comparative Neurology 507, no. 4 (April 1, 2008): 1479–96. https://doi.org/10.1002/cne.21636.
spab	0	1.3144	0.856	0.268	0	1	spab
SPR	1.86371e-118	0.693155	0.564	0.275	2.5967e-114	1	SPR
Spred	4.57247e-73	0.516047	0.766	0.695	6.37082e-69	1	Spred
spri	9.7065e-12	0.286639	0.298	0.237	1.35241e-07	1	spri
SRPK	1.38196e-49	0.54182	0.571	0.473	1.92549e-45	1	SRPK
stx	1.36116e-46	0.475469	0.567	0.452	1.8965e-42	1	stx
sty	4.15331e-26	0.2739	0.609	0.5	5.7868e-22	1	sty
Su(Tpl)	7.08473e-19	0.333139	0.549	0.533	9.87116e-15	1	Su(Tpl)
svr	3.86205e-64	0.52492	0.674	0.547	5.381e-60	1	svr
Swip-1	4.21016e-47	0.470309	0.677	0.623	5.86602e-43	1	Swip-1
syd	1.34337e-18	0.385255	0.398	0.335	1.87172e-14	1	syd
tara	1.3711e-16	0.371658	0.405	0.347	1.91035e-12	1	tara
Ten-a	9.08915e-191	0.477177	0.993	0.961	1.26639e-186	1	Ten-a
TfIIA-S	1.56718e-26	0.308349	0.716	0.69	2.18355e-22	1	TfIIA-S
tinc	2.22444e-10	0.261138	0.459	0.427	3.09932e-06	1	tinc
tna	4.66669e-78	0.356422	0.969	0.902	6.50209e-74	1	tna
Tob	1.7494e-56	0.478011	0.713	0.607	2.43743e-52	1	Tob
toc	1.1498e-20	0.379773	0.484	0.431	1.60202e-16	1	toc
Toll-7	0	1.28842	0.801	0.333	0	1	Toll-7
Tom20	2.27333e-30	0.329132	0.684	0.64	3.16743e-26	1	Tom20
Tomosyn	2.6699e-191	0.807303	0.868	0.664	3.71997e-187	1	Tomosyn
Top3beta	4.19218e-25	0.419504	0.3	0.2	5.84097e-21	1	Top3beta
tow	5.58342e-180	0.870212	0.756	0.487	7.77938e-176	1	tow
toy	3.90174e-84	0.427501	0.848	0.507	5.4363e-80	1	toy		Kurusu, M., T. Nagao, U. Walldorf, S. Flister, W. J. Gehring, and K. Furukubo-Tokunaga. “Genetic Control of Development of the Mushroom Bodies, the Associative Learning Centers in the Drosophila Brain, by the Eyeless, Twin of Eyeless, and Dachshund Genes.” Proceedings of the National Academy of Sciences of the United States of America 97, no. 5 (February 29, 2000): 2140–44. https://doi.org/10.107…
trio	6.43138e-54	0.508763	0.562	0.428	8.96084e-50	1	trio		Awasaki, T., M. Saito, M. Sone, E. Suzuki, R. Sakai, K. Ito, and C. Hama. “The Drosophila Trio Plays an Essential Role in Patterning of Axons by Regulating Their Directional Extension.” Neuron 26, no. 1 (April 2000): 119–31.
Trpm	1.68943e-37	0.40505	0.375	0.234	2.35388e-33	1	Trpm
tutl	1.90716e-58	0.285925	0.953	0.878	2.65725e-54	1	tutl
UbcE2H	5.87862e-14	0.345183	0.334	0.275	8.19068e-10	1	UbcE2H
Ubi-p5E	7.99424e-144	0.447166	0.987	0.96	1.11384e-139	1	Ubi-p5E
unc-104	1.6222e-45	0.413288	0.734	0.694	2.26021e-41	1	unc-104
Unc-76	1.95854e-98	0.642854	0.724	0.586	2.72883e-94	1	Unc-76
upSET	4.1307e-20	0.308772	0.579	0.565	5.7553e-16	1	upSET
VAChT	2.34123e-64	0.498956	0.708	0.536	3.26203e-60	1	VAChT
Vha16-1	2.13589e-92	0.318696	0.982	0.962	2.97593e-88	1	Vha16-1
Vha36-1	4.04655e-40	0.308818	0.818	0.786	5.63805e-36	1	Vha36-1
vig	1.70651e-23	0.265785	0.737	0.721	2.37768e-19	1	vig
w	6.1575e-253	1.09841	0.845	0.461	8.57924e-249	1	w
wdb	1.34407e-116	0.538852	0.899	0.824	1.87269e-112	1	wdb
wts	7.83131e-21	0.347246	0.306	0.214	1.09114e-16	1	wts
zfh2	5.27638e-125	0.629864	0.321	0.089	7.35158e-121	1	zfh2
18w1	7.66334e-17	0.328202	0.255	0.168	1.06773e-12	2	18w
5-HT1A	0	1.58259	0.994	0.522	0	2	5-HT1A
Adk1	1.97991e-44	0.54986	0.366	0.207	2.75861e-40	2	Adk1
alpha-Man-Ia	1.22894e-48	0.549752	0.429	0.264	1.71229e-44	2	alpha-Man-Ia
ap	4.8578e-185	0.757881	0.702	0.267	6.76838e-181	2	ap
AstC-R1	1.51083e-65	0.59389	0.433	0.221	2.10504e-61	2	AstC-R1
Atox1	4.21229e-81	0.344913	0.988	0.929	5.86899e-77	2	Atox1
beat-IIIb	2.50818e-128	0.676748	0.809	0.505	3.49465e-124	2	beat-IIIb
bif	1.00488e-07	0.274217	0.426	0.424	0.0014001	2	bif
bru31	1.85378e-78	0.370661	0.985	0.796	2.58288e-74	2	bru3
CaBP11	2.8819e-26	0.347251	0.579	0.516	4.01535e-22	2	CaBP1
CadN2	1.09723e-06	0.262708	0.387	0.377	0.0152877	2	CadN2
Calr1	9.928e-79	0.458455	0.937	0.852	1.38327e-74	2	Calr
CanB2	1.21266e-45	0.259358	0.98	0.887	1.6896e-41	2	CanB2
caps	9.32035e-140	0.766223	0.79	0.505	1.29861e-135	2	caps
CCKLR-17D31	3.3961e-35	0.429338	0.437	0.29	4.73178e-31	2	CCKLR-17D3
cdi	1.35828e-20	0.260311	0.735	0.734	1.8925e-16	2	cdi
CG11317	1.36783e-08	0.264132	0.294	0.242	0.000190579	2	CG11317
CG11638	1.93849e-44	0.552871	0.539	0.421	2.70089e-40	2	CG11638
CG11873	4.37929e-19	0.293459	0.629	0.621	6.10166e-15	2	CG11873
CG12991	6.67213e-34	0.428047	0.588	0.508	9.29628e-30	2	CG12991
CG13594	2.50323e-188	0.902017	0.751	0.389	3.48775e-184	2	CG13594
CG13685	0	1.35634	0.899	0.497	0	2	CG13685
CG13698	6.49517e-164	0.782072	0.378	0.099	9.04971e-160	2	CG13698
CG13920	4.47072e-119	0.439799	0.988	0.942	6.22906e-115	2	CG13920
CG14024	1.7902e-48	0.486202	0.652	0.513	2.49428e-44	2	CG14024
CG14321	3.25854e-32	0.292509	0.767	0.723	4.54013e-28	2	CG14321
CG14509	2.23549e-100	0.317256	0.987	0.888	3.11471e-96	2	CG14509
CG14535	1.72827e-115	0.764281	0.67	0.417	2.408e-111	2	CG14535
CG148531	3.64747e-09	0.290347	0.285	0.235	5.08202e-05	2	CG14853
CG14883	2.78378e-09	0.291933	0.348	0.314	3.87863e-05	2	CG14883
CG15012	1.54257e-39	0.287107	0.872	0.853	2.14926e-35	2	CG15012
CG15236	1.7451e-24	0.251549	0.633	0.515	2.43145e-20	2	CG15236
CG15522	1.40157e-28	0.404537	0.52	0.406	1.95281e-24	2	CG15522
CG15628	1.96911e-15	0.275316	0.618	0.614	2.74357e-11	2	CG15628
CG17124	9.92283e-64	0.358053	0.944	0.863	1.38255e-59	2	CG17124
CG17270	3.72342e-55	0.366837	0.87	0.78	5.18784e-51	2	CG17270
CG1965	5.55035e-06	0.253524	0.337	0.322	0.0773331	2	CG1965
CG2993	2.5587e-18	0.261056	0.689	0.673	3.56504e-14	2	CG2993
CG301161	8.20166e-23	0.272361	0.648	0.553	1.14274e-18	2	CG30116
CG30172	2.93044e-87	0.291624	0.995	0.969	4.08298e-83	2	CG30172
CG30463	1.04819e-161	0.831749	0.856	0.577	1.46044e-157	2	CG30463
CG310301	1.5627e-33	0.263161	0.87	0.854	2.17731e-29	2	CG31030
CG315221	8.64053e-06	0.282405	0.341	0.338	0.120388	2	CG31522
CG31637	1.20807e-69	0.510202	0.69	0.514	1.68321e-65	2	CG31637
CG3198	9.42511e-14	0.313481	0.491	0.472	1.3132e-09	2	CG3198
CG32052	2.59743e-71	0.534582	0.461	0.235	3.61901e-67	2	CG32052
CG32369	1.56604e-29	0.437143	0.496	0.398	2.18196e-25	2	CG32369
CG32373	5.98842e-200	0.674398	0.326	0.062	8.34367e-196	2	CG32373
CG32428	4.94301e-11	0.316249	0.398	0.37	6.8871e-07	2	CG32428
CG32521	2.47574e-247	1.01021	0.782	0.344	3.44944e-243	2	CG32521
CG32698	4.14721e-31	0.301412	0.456	0.291	5.7783e-27	2	CG32698
CG32772	6.85774e-13	0.283786	0.463	0.437	9.55488e-09	2	CG32772
CG33143	3.02315e-38	0.300416	0.796	0.686	4.21215e-34	2	CG33143
CG335431	6.34123e-141	0.681949	0.89	0.562	8.83524e-137	2	CG33543
CG33977	2.51075e-17	0.263467	0.591	0.586	3.49823e-13	2	CG33977
CG34113	0	1.20572	0.995	0.767	0	2	CG34113
CG34136	0	1.33658	0.95	0.544	0	2	CG34136
CG34155	6.44361e-188	0.874995	0.779	0.379	8.97789e-184	2	CG34155
CG34353	0	1.52541	0.998	0.653	0	2	CG34353
CG34354	1.9853e-47	0.396564	0.813	0.674	2.76612e-43	2	CG34354
CG34371	2.5271e-206	1.00392	0.778	0.387	3.521e-202	2	CG34371
CG34384	8.15256e-23	0.344584	0.445	0.347	1.1359e-18	2	CG34384
CG34401	9.56112e-29	0.292333	0.811	0.794	1.33215e-24	2	CG34401
CG3625	4.41172e-26	0.311264	0.728	0.699	6.14685e-22	2	CG3625
CG422651	8.12627e-30	0.316412	0.81	0.752	1.13223e-25	2	CG42265
CG42313	9.47081e-71	0.38899	0.941	0.736	1.31957e-66	2	CG42313
CG423241	5.67406e-10	0.274335	0.41	0.374	7.90567e-06	2	CG42324
CG42339	6.18822e-58	0.483539	0.56	0.352	8.62205e-54	2	CG42339
CG42340	2.32982e-147	0.68442	0.912	0.7	3.24614e-143	2	CG42340
CG42389	2.7498e-109	0.564615	0.863	0.675	3.8313e-105	2	CG42389
CG42540	0	0.961939	0.996	0.921	0	2	CG42540
CG425411	5.17261e-49	0.289114	0.94	0.81	7.207e-45	2	CG42541
CG42673	1.48452e-207	0.946302	0.676	0.278	2.06838e-203	2	CG42673
CG42674	2.70581e-21	0.288624	0.66	0.579	3.77001e-17	2	CG42674
CG43729	6.03293e-61	0.281718	0.973	0.856	8.40568e-57	2	CG43729
CG4546	0	0.666763	0.268	0.02	0	2	CG4546
CG4741	3.88178e-102	0.551419	0.285	0.082	5.40848e-98	2	CG4741
CG4829	2.08754e-296	1.10481	0.723	0.227	2.90856e-292	2	CG4829
CG6024	2.68968e-188	0.808043	0.894	0.674	3.74754e-184	2	CG6024
CG8300	4.80057e-08	0.294001	0.36	0.337	0.000668863	2	CG8300
CG9109	1.83107e-175	0.71968	0.454	0.119	2.55123e-171	2	CG9109
CG9650	9.69475e-77	0.264282	0.691	0.335	1.35077e-72	2	CG9650
cmpy	0	1.7254	1	0.789	0	2	cmpy
COX7A	2.28529e-66	0.298514	0.982	0.932	3.18409e-62	2	COX7A
CR453121	2.10141e-67	0.519242	0.66	0.446	2.92789e-63	2	CR45312
CR45668	2.7371e-31	0.416282	0.298	0.171	3.8136e-27	2	CR45668
CR45758	2.14038e-111	0.585004	0.878	0.697	2.98219e-107	2	CR45758
CR46003	2.26899e-92	0.597177	0.328	0.11	3.16139e-88	2	CR46003
ct	7.92343e-91	0.429876	0.618	0.277	1.10397e-86	2	ct
dlp	2.23281e-60	0.56741	0.382	0.188	3.11098e-56	2	dlp
dpr13	5.63942e-223	0.888851	0.968	0.663	7.8574e-219	2	dpr13
dpr14	1.32147e-41	0.359399	0.782	0.719	1.8412e-37	2	dpr14
dpr15	2.17662e-52	0.514698	0.465	0.287	3.03269e-48	2	dpr15
dpr18	1.5486e-91	0.667693	0.552	0.304	2.15767e-87	2	dpr18
dpr20	2.23616e-54	0.500395	0.491	0.294	3.11564e-50	2	dpr20
dpr4	6.40613e-19	0.365017	0.488	0.436	8.92565e-15	2	dpr4
dpr5	8.31012e-249	1.0339	0.82	0.391	1.15785e-244	2	dpr5
dpr81	9.92203e-190	0.722996	0.961	0.789	1.38244e-185	2	dpr8
drl	2.28524e-121	0.699483	0.705	0.419	3.18403e-117	2	drl
Dscam4	1.93357e-88	0.443542	0.9	0.733	2.69404e-84	2	Dscam4
Efa6	1.94804e-33	0.464552	0.466	0.355	2.7142e-29	2	Efa6
Eip93F	0	1.16736	0.98	0.492	0	2	Eip93F
emc1	7.60274e-21	0.250522	0.744	0.678	1.05929e-16	2	emc
Flo11	3.60802e-18	0.283305	0.54	0.494	5.02705e-14	2	Flo1
fred1	4.24242e-127	0.592253	0.867	0.529	5.91097e-123	2	fred
fru	0	1.18393	0.999	0.894	0	2	fru
ftz-f1	1.34813e-109	0.717101	0.677	0.397	1.87834e-105	2	ftz-f1
fz2	2.05784e-274	0.951877	0.98	0.769	2.86719e-270	2	fz2
glec	5.47326e-49	0.436724	0.655	0.516	7.62589e-45	2	glec
GluClalpha	2.91449e-147	0.565178	0.987	0.899	4.06076e-143	2	GluClalpha
GluRIA2	1.40527e-72	0.517329	0.688	0.464	1.95797e-68	2	GluRIA
GluRIB2	1.46691e-91	0.465492	0.876	0.61	2.04385e-87	2	GluRIB
Gp931	2.58858e-09	0.279286	0.456	0.453	3.60666e-05	2	Gp93
gpp	7.44439e-88	0.587959	0.826	0.706	1.03723e-83	2	gpp
Gycbeta100B1	1.11107e-43	0.486514	0.44	0.281	1.54805e-39	2	Gycbeta100B
ham	0	1.37654	0.856	0.176	0	2	ham
hbs	1.59358e-43	0.431343	0.48	0.311	2.22033e-39	2	hbs
HmgD	2.11436e-20	0.264751	0.729	0.716	2.94593e-16	2	HmgD
Hs3st-A	3.32985e-29	0.26045	0.83	0.742	4.63948e-25	2	Hs3st-A
jeb	5.25713e-114	0.594267	0.905	0.726	7.32476e-110	2	jeb
JIL-1	4.23185e-21	0.298346	0.591	0.57	5.89624e-17	2	JIL-1
Jupiter	5.55505e-71	0.309476	0.984	0.953	7.73985e-67	2	Jupiter
KdelR	4.24471e-17	0.263402	0.674	0.678	5.91415e-13	2	KdelR
KrT95D	4.48368e-212	0.995715	0.938	0.795	6.2471e-208	2	KrT95D
l(3)neo38	8.31048e-17	0.285353	0.538	0.483	1.1579e-12	2	l(3)neo38
Lar1	1.35633e-181	0.645229	0.98	0.906	1.88978e-177	2	Lar
lbk	5.72386e-257	1.12029	0.885	0.518	7.97505e-253	2	lbk
LRR	0.00128121	0.251049	0.409	0.456	1	2	LRR
mam	4.46843e-81	0.472717	0.922	0.838	6.22587e-77	2	mam
mamo	9.2108e-37	0.275715	0.759	0.515	1.28334e-32	2	mamo
Mical1	1.35425e-13	0.31972	0.38	0.322	1.88687e-09	2	Mical
mnb	1.81922e-39	0.264334	0.913	0.891	2.53471e-35	2	mnb
Moe	4.2599e-18	0.287064	0.596	0.58	5.93532e-14	2	Moe
MRE161	5.06738e-93	0.293421	0.998	0.977	7.06038e-89	2	MRE16
nAChRalpha5	1.45432e-221	0.55484	1	0.973	2.0263e-217	2	nAChRalpha5
NaCP60E1	1.19072e-51	0.293036	0.929	0.869	1.65904e-47	2	NaCP60E
Nlg31	1.24402e-59	0.299972	0.973	0.886	1.7333e-55	2	Nlg3
nmo	2.73032e-55	0.284861	0.96	0.915	3.80415e-51	2	nmo
nolo1	1.58285e-36	0.297463	0.66	0.507	2.20539e-32	2	nolo
Nos	0	1.49464	0.721	0.177	0	2	Nos
nrm	7.30557e-44	0.335313	0.79	0.703	1.01789e-39	2	nrm
nrv2	7.07998e-108	0.595952	0.859	0.699	9.86454e-104	2	nrv2
NUCB11	1.4447e-26	0.293544	0.713	0.689	2.0129e-22	2	NUCB1
Oct-TyrR	1.43708e-177	0.854137	0.813	0.446	2.00228e-173	2	Oct-TyrR
Oli	3.06375e-09	0.250729	0.471	0.471	4.26872e-05	2	Oli
otk	1.23281e-12	0.270603	0.479	0.428	1.71767e-08	2	otk
Pde6	3.69845e-91	0.492089	0.918	0.757	5.15305e-87	2	Pde6
pgant21	2.32571e-176	0.879625	0.75	0.396	3.24041e-172	2	pgant2
pHCl-1	7.10372e-27	0.28338	0.637	0.512	9.89761e-23	2	pHCl-1
pigs	9.50304e-39	0.467949	0.515	0.382	1.32406e-34	2	pigs
PKD	1.57451e-39	0.464046	0.346	0.2	2.19376e-35	2	PKD
Plc21C	1.67865e-18	0.315553	0.677	0.683	2.33886e-14	2	Plc21C
plum	7.2513e-68	0.572248	0.63	0.437	1.01032e-63	2	plum
plx	8.39165e-12	0.289797	0.448	0.417	1.16921e-07	2	plx
prage	1.84498e-21	0.361163	0.261	0.157	2.57061e-17	2	prage
prod	1.52422e-31	0.450035	0.441	0.336	2.12369e-27	2	prod
Prosalpha5	8.42721e-11	0.250677	0.509	0.51	1.17416e-06	2	Prosalpha5
Ptp10D1	1.11913e-52	0.411932	0.744	0.637	1.55929e-48	2	Ptp10D
Pxn1	8.45148e-127	0.576243	0.856	0.543	1.17754e-122	2	Pxn
qm	1.30404e-100	0.612083	0.388	0.147	1.81692e-96	2	qm
qtc	2.3245e-19	0.321211	0.598	0.584	3.23873e-15	2	qtc
Rm62	2.45664e-43	0.305088	0.913	0.882	3.42284e-39	2	Rm62
robo3	1.71221e-72	0.581689	0.516	0.292	2.38561e-68	2	robo3
RpII215	1.66348e-10	0.277947	0.437	0.422	2.31772e-06	2	RpII215
RpLP0	4.86143e-55	0.305204	0.967	0.941	6.77343e-51	2	RpLP0
S	1.5228e-08	0.258241	0.452	0.455	0.000212172	2	S
sbb	6.80017e-54	0.26348	0.963	0.936	9.47468e-50	2	sbb
sca	4.25766e-30	0.469424	0.463	0.339	5.9322e-26	2	sca
scro	3.00437e-90	0.490392	0.549	0.239	4.18599e-86	2	scro
scyl1	1.35562e-127	0.678695	0.913	0.762	1.88878e-123	2	scyl
sdt1	7.73271e-286	1.06414	0.968	0.815	1.0774e-281	2	sdt
sfl	2.0782e-71	0.606244	0.574	0.376	2.89556e-67	2	sfl
Shawl1	7.29092e-44	0.480835	0.529	0.377	1.01584e-39	2	Shawl
shep	9.41156e-194	0.45699	1	0.989	1.31131e-189	2	shep
smal	1.13397e-153	0.824853	0.829	0.566	1.57996e-149	2	smal
smt3	1.21722e-58	0.295601	0.977	0.946	1.69595e-54	2	smt3
snRNA:7SK	7.30665e-45	0.414457	0.78	0.714	1.01804e-40	2	snRNA:7SK
Sox102F	7.69156e-58	0.323513	0.374	0.156	1.07166e-53	2	Sox102F
SP23531	1.47673e-134	0.74689	0.844	0.661	2.05753e-130	2	SP2353
spab1	4.58308e-159	0.629726	0.67	0.277	6.3856e-155	2	spab
Spn	1.8627e-226	0.609915	0.998	0.961	2.5953e-222	2	Spn
sqd	9.86747e-34	0.275409	0.915	0.896	1.37483e-29	2	sqd
ST6Gal	3.6096e-28	0.371962	0.338	0.208	5.02925e-24	2	ST6Gal
stai	1.18316e-303	0.841579	1	0.954	1.6485e-299	2	stai
stan	1.08756e-53	0.517247	0.438	0.251	1.5153e-49	2	stan
Su(var)205	4.82087e-49	0.357808	0.854	0.791	6.71692e-45	2	Su(var)205
tai	7.40427e-17	0.258021	0.661	0.657	1.03164e-12	2	tai
Tbh	5.83421e-88	0.611751	0.376	0.151	8.12881e-84	2	Tbh
Ten-m	6.35313e-25	0.327815	0.684	0.611	8.85181e-21	2	Ten-m
ths	2.10961e-86	0.677749	0.605	0.394	2.93932e-82	2	ths
Toll-71	4.96195e-15	0.285067	0.415	0.347	6.91348e-11	2	Toll-7
toy1	2.30844e-95	0.491212	0.878	0.507	3.21636e-91	2	toy
Trf2	1.54816e-12	0.27513	0.679	0.707	2.15704e-08	2	Trf2
Trim9	6.62708e-84	0.536698	0.732	0.478	9.23351e-80	2	Trim9
trn1	2.10754e-265	1.30718	0.878	0.47	2.93644e-261	2	trn
trv	1.13278e-190	0.624322	1	0.877	1.57831e-186	2	trv
trx	6.24784e-22	0.260858	0.738	0.752	8.70511e-18	2	trx
Tsp96F	7.09869e-27	0.26186	0.829	0.802	9.8906e-23	2	Tsp96F
U4-U6-60K	3.3599e-10	0.274577	0.45	0.445	4.68135e-06	2	U4-U6-60K
Vsx1	8.89434e-116	0.514667	0.27	0.065	1.23925e-111	2	Vsx1
Wdr62	4.04387e-26	0.332163	0.721	0.701	5.63433e-22	2	Wdr62
wit	1.96352e-14	0.293937	0.259	0.178	2.73577e-10	2	wit
X11Lbeta	7.23169e-82	0.567184	0.768	0.614	1.00759e-77	2	X11Lbeta
Xbp1	1.77594e-13	0.331234	0.426	0.384	2.47441e-09	2	Xbp1
ytr	7.49466e-09	0.277892	0.313	0.268	0.000104423	2	ytr
Ace	2.84828e-38	0.30291	0.9	0.767	3.96851e-34	3	Ace
AdipoR	1.83222e-23	0.288185	0.615	0.542	2.55283e-19	3	AdipoR
alc	2.57254e-44	0.402361	0.651	0.508	3.58432e-40	3	alc
AstA-R1	0	0.971834	0.607	0.152	0	3	AstA-R1
AstC-R2	9.44244e-59	1.10494	0.566	0.404	1.31562e-54	3	AstC-R2
Atox11	2.69873e-87	0.353525	0.983	0.929	3.76014e-83	3	Atox1
beat-Ib	1.25876e-47	0.319849	0.762	0.556	1.75383e-43	3	beat-Ib
beat-IV	1.16121e-71	0.517244	0.592	0.343	1.61791e-67	3	beat-IV
beat-Va	3.25138e-20	0.286738	0.46	0.349	4.53015e-16	3	beat-Va
bin3	1.56747e-17	0.279966	0.524	0.451	2.18396e-13	3	bin3
br	1.36554e-182	0.403159	0.608	0.181	1.90261e-178	3	br
bves	3.634e-14	0.307553	0.444	0.384	5.06326e-10	3	bves
Bx1	1.50269e-139	0.44382	0.854	0.41	2.0937e-135	3	Bx
CenG1A	1.41795e-70	0.524473	0.434	0.212	1.97563e-66	3	CenG1A
CG10011	1.60594e-145	0.894309	0.749	0.467	2.23755e-141	3	CG10011
CG11191	1.02266e-27	0.428046	0.491	0.364	1.42487e-23	3	CG11191
CG112211	4.26263e-54	0.599548	0.35	0.167	5.93912e-50	3	CG11221
CG12290	7.64206e-155	0.736499	0.449	0.144	1.06477e-150	3	CG12290
CG13055	1.46928e-106	0.661433	0.789	0.575	2.04715e-102	3	CG13055
CG13893	9.49603e-36	0.475726	0.335	0.193	1.32308e-31	3	CG13893
CG139201	5.94102e-297	0.7794	0.995	0.942	8.27762e-293	3	CG13920
CG14079	0	0.638926	0.282	0.009	0	3	CG14079
CG14082	0	1.18239	0.684	0.186	0	3	CG14082
CG141861	0.000188551	0.278876	0.486	0.495	1	3	CG14186
CG14207	3.91626e-28	0.362635	0.427	0.305	5.45652e-24	3	CG14207
CG14431	5.67236e-82	0.555415	0.419	0.181	7.90329e-78	3	CG14431
CG14459	0	1.31876	0.873	0.228	0	3	CG14459
CG15097	2.37304e-15	0.299893	0.396	0.316	3.30636e-11	3	CG15097
CG156281	8.17105e-112	0.696069	0.81	0.608	1.13847e-107	3	CG15628
CG157651	3.96326e-164	0.746692	0.937	0.629	5.52201e-160	3	CG15765
CG16779	6.17028e-128	0.568904	0.945	0.818	8.59706e-124	3	CG16779
CG17716	4.38558e-93	0.44435	0.903	0.593	6.11043e-89	3	CG17716
CG177781	5.63253e-116	0.787086	0.77	0.52	7.84781e-112	3	CG17778
CG18265	8.7685e-27	0.306684	0.326	0.192	1.22171e-22	3	CG18265
CG188121	1.7472e-16	0.25187	0.646	0.596	2.43437e-12	3	CG18812
CG301162	1.16256e-185	0.799365	0.885	0.545	1.61979e-181	3	CG30116
CG304631	2.68985e-77	0.433951	0.819	0.578	3.74777e-73	3	CG30463
CG3104	4.12857e-18	0.306242	0.385	0.293	5.75233e-14	3	CG3104
CG31676	4.63835e-226	0.773425	0.715	0.228	6.46261e-222	3	CG31676
CG316901	6.80603e-36	0.365233	0.512	0.355	9.48284e-32	3	CG31690
CG318141	0	1.68072	0.983	0.327	0	3	CG31814
CG322041	2.16275e-90	0.632718	0.566	0.294	3.01335e-86	3	CG32204
CG32683	1.60198e-113	0.616253	0.682	0.356	2.23204e-109	3	CG32683
CG341551	1.11861e-110	0.487002	0.734	0.381	1.55856e-106	3	CG34155
CG343541	1.96984e-39	0.315118	0.84	0.673	2.74458e-35	3	CG34354
CG34377	0	1.1126	0.593	0.091	0	3	CG34377
CG34383	1.37652e-228	0.846035	0.959	0.728	1.9179e-224	3	CG34383
CG3726	9.14349e-95	0.55877	0.706	0.4	1.27396e-90	3	CG3726
CG423131	7.67897e-164	0.681954	0.988	0.734	1.06991e-159	3	CG42313
CG423401	1.32602e-50	0.355733	0.864	0.701	1.84754e-46	3	CG42340
CG4238	2.81009e-16	0.330911	0.311	0.228	3.9153e-12	3	CG4238
CG425412	7.89914e-153	0.615465	0.985	0.808	1.10059e-148	3	CG42541
CG42663	5.32508e-53	0.489107	0.459	0.265	7.41943e-49	3	CG42663
CG42668	5.06309e-27	0.306633	0.674	0.599	7.05441e-23	3	CG42668
CG42750	5.83334e-275	0.990563	0.975	0.672	8.12759e-271	3	CG42750
CG43143	1.01257e-35	0.369401	0.674	0.545	1.41082e-31	3	CG43143
CG43658	0	1.58312	0.948	0.563	0	3	CG43658
CG43689	0	1.80439	0.983	0.131	0	3	CG43689
CG437951	5.15603e-131	0.765713	0.62	0.289	7.18389e-127	3	CG43795
CG44153	4.37905e-54	0.342123	0.756	0.536	6.10133e-50	3	CG44153
CG4467	5.71653e-168	0.780607	0.878	0.612	7.96484e-164	3	CG4467
CG44837	4.04922e-137	0.739757	0.713	0.394	5.64178e-133	3	CG44837
CG452631	7.42902e-227	0.817342	0.983	0.653	1.03509e-222	3	CG45263
CG48291	1.23074e-242	0.938046	0.695	0.228	1.71478e-238	3	CG4829
CG58301	3.79312e-08	0.270356	0.295	0.242	0.000528495	3	CG5830
CG6329	1.65514e-104	0.33815	0.994	0.962	2.30611e-100	3	CG6329
CG6770	9.96497e-42	0.273499	0.962	0.894	1.38842e-37	3	CG6770
CG7220	4.22346e-140	0.849251	0.761	0.508	5.88455e-136	3	CG7220
CG8861	0	1.45151	0.978	0.429	0	3	CG8861
CG89101	9.12839e-31	0.40035	0.445	0.31	1.27186e-26	3	CG8910
CG9008	2.31137e-157	0.676233	0.376	0.1	3.22043e-153	3	CG9008
CG9328	1.53308e-28	0.409016	0.428	0.306	2.13604e-24	3	CG9328
chinmo	1.8645e-43	0.271039	0.976	0.906	2.59781e-39	3	chinmo
Con	0	1.42797	1	0.621	0	3	Con
Cow1	0	1.0808	0.984	0.693	0	3	Cow
cpo	1.90377e-243	0.707758	0.998	0.932	2.65252e-239	3	cpo
CR44320	7.70713e-130	0.670635	0.367	0.111	1.07383e-125	3	CR44320
CR453321	6.21204e-51	0.423228	0.531	0.332	8.65524e-47	3	CR45332
CR45347	8.4306e-31	0.380129	0.256	0.131	1.17464e-26	3	CR45347
CR45660	2.72611e-162	0.597127	0.375	0.094	3.79829e-158	3	CR45660
crb	7.45746e-55	0.430292	0.301	0.128	1.03905e-50	3	crb
Dad	1.67715e-13	0.274733	0.392	0.324	2.33677e-09	3	Dad
Dat	1.08601e-61	0.450406	0.643	0.382	1.51313e-57	3	Dat
DIP-eta	0	0.959983	0.675	0.135	0	3	DIP-eta
DIP-theta	0	1.3807	0.963	0.309	0	3	DIP-theta
disco	0	1.48914	0.797	0.087	0	3	disco
disco-r	0	1.21443	0.697	0.072	0	3	disco-r
Dlic	1.98301e-16	0.274165	0.56	0.513	2.76292e-12	3	Dlic
dmrt99B	0	0.645473	0.321	0.03	0	3	dmrt99B
dnc1	1.78731e-74	0.344459	0.97	0.914	2.49025e-70	3	dnc
Dop2R1	3.67166e-52	0.409703	0.742	0.541	5.11572e-48	3	Dop2R
dpr11	1.73793e-72	0.439214	0.758	0.508	2.42145e-68	3	dpr11
dpr131	5.52567e-80	0.444207	0.913	0.665	7.69891e-76	3	dpr13
dpr17	1.29541e-240	0.982048	0.825	0.372	1.8049e-236	3	dpr17
dpr2	8.76476e-23	0.29335	0.448	0.33	1.22119e-18	3	dpr2
dpr3	2.92877e-42	0.398228	0.493	0.307	4.08066e-38	3	dpr3
dpr6	6.56006e-55	0.428939	0.758	0.563	9.14013e-51	3	dpr6
Dscam2	1.55855e-79	0.293662	0.995	0.96	2.17153e-75	3	Dscam2
Dtg	0	1.74669	0.763	0.063	0	3	Dtg
Dys	1.45929e-86	0.620908	0.702	0.482	2.03323e-82	3	Dys
eag	1.45957e-68	0.492168	0.703	0.48	2.03362e-64	3	eag
eIF4A	1.43329e-75	0.257926	0.995	0.978	1.99701e-71	3	eIF4A
eIF4EHP	1.60548e-40	0.344774	0.86	0.779	2.23692e-36	3	eIF4EHP
Eip63E	2.79814e-31	0.293624	0.806	0.7	3.89865e-27	3	Eip63E
Eip75B1	3.78918e-30	0.437545	0.759	0.689	5.27947e-26	3	Eip75B
emc2	1.33362e-35	0.296657	0.814	0.676	1.85813e-31	3	emc
Frq2	3.10062e-48	0.313306	0.86	0.691	4.32009e-44	3	Frq2
GFP1	1.35906e-39	0.441802	0.833	0.84	1.89358e-35	3	GFP
GluClalpha1	4.72944e-198	0.695069	0.986	0.899	6.58953e-194	3	GluClalpha
Glut4EF1	1.53383e-101	0.509064	0.944	0.806	2.13709e-97	3	Glut4EF
gpp1	6.10418e-44	0.34008	0.801	0.707	8.50495e-40	3	gpp
Gug1	2.48288e-32	0.282262	0.82	0.762	3.4594e-28	3	Gug
gukh	8.20808e-25	0.306457	0.54	0.434	1.14363e-20	3	gukh
His3.3B	7.57778e-162	0.441564	0.996	0.969	1.05581e-157	3	His3.3B
Hr31	2.88241e-22	0.281624	0.694	0.641	4.01607e-18	3	Hr3
Hr381	0.00012874	0.511649	0.53	0.519	1	3	Hr38
Hr4	1.77981e-122	0.516405	0.978	0.904	2.47981e-118	3	Hr4
Hsp67Bc	2.85039e-94	0.347747	0.999	0.993	3.97146e-90	3	Hsp67Bc
Hsromega	7.06883e-88	0.402248	0.996	0.976	9.84899e-84	3	Hsromega
hwt	2.60202e-103	0.517699	0.926	0.8	3.62539e-99	3	hwt
Ih	1.5422e-160	0.683068	0.943	0.796	2.14874e-156	3	Ih
Imp1	6.76352e-160	0.45862	0.587	0.174	9.42361e-156	3	Imp
inaE	5.95808e-83	0.540007	0.748	0.561	8.30139e-79	3	inaE
IRSp53	0	1.62441	0.813	0.045	0	3	IRSp53
kay	2.32155e-09	0.328701	0.301	0.239	3.23461e-05	3	kay
kek31	5.77134e-89	0.569287	0.654	0.375	8.04121e-85	3	kek3
kek6	1.16917e-17	0.308309	0.478	0.404	1.62901e-13	3	kek6
klar1	5.22386e-95	0.511802	0.911	0.772	7.2784e-91	3	klar
ko	1.94506e-83	0.441273	0.272	0.084	2.71005e-79	3	ko
kug1	5.26936e-22	0.296043	0.543	0.422	7.3418e-18	3	kug
kuz2	6.99816e-43	0.321149	0.842	0.743	9.75054e-39	3	kuz
lbk1	2.66852e-71	0.481836	0.737	0.523	3.71805e-67	3	lbk
lbm	5.93203e-117	0.668187	0.435	0.156	8.26509e-113	3	lbm
lilli	5.88102e-20	0.256256	0.67	0.618	8.19402e-16	3	lilli
lov	0	0.720266	0.357	0.029	0	3	lov
mam1	1.56881e-75	0.394337	0.935	0.838	2.18583e-71	3	mam
mamo1	2.84757e-177	0.65342	0.952	0.508	3.96752e-173	3	mamo
Mbs	2.10237e-32	0.376935	0.593	0.482	2.92923e-28	3	Mbs
mGluR1	1.12095e-37	0.410863	0.495	0.324	1.56182e-33	3	mGluR
Mkp3	1.78295e-41	0.700449	0.65	0.523	2.48418e-37	3	Mkp3
msn	8.64184e-79	0.568949	0.7	0.512	1.20407e-74	3	msn
mtt	4.41567e-33	0.387993	0.31	0.171	6.15235e-29	3	mtt
nAChRalpha3	1.83961e-42	0.340004	0.669	0.482	2.56313e-38	3	nAChRalpha3
nAChRalpha62	4.05557e-145	0.580551	0.971	0.705	5.65063e-141	3	nAChRalpha6
nAChRalpha7	3.95875e-89	0.411063	0.964	0.769	5.51573e-85	3	nAChRalpha7
Nckx30C	3.53026e-48	0.313446	0.943	0.875	4.91872e-44	3	Nckx30C
Nlg2	3.70393e-76	0.51558	0.849	0.699	5.16069e-72	3	Nlg2
Nlg4	2.66905e-162	0.770425	0.764	0.422	3.71878e-158	3	Nlg4
norpA1	4.53265e-65	0.472553	0.731	0.555	6.31535e-61	3	norpA
numb1	2.25476e-23	0.349958	0.5	0.406	3.14156e-19	3	numb
Oamb1	6.39082e-20	0.281923	0.275	0.169	8.90433e-16	3	Oamb
Octbeta2R	3.7707e-75	0.392724	0.819	0.561	5.25372e-71	3	Octbeta2R
pan	9.37555e-37	0.256166	0.933	0.899	1.3063e-32	3	pan
para	1.20111e-124	0.382804	1	0.974	1.67351e-120	3	para
Prosap	2.34017e-108	0.405282	0.989	0.938	3.26056e-104	3	Prosap
ps	3.46492e-48	0.267687	0.991	0.946	4.82767e-44	3	ps
Ptp99A	4.85049e-129	0.529992	0.989	0.881	6.75818e-125	3	Ptp99A
puc1	2.45233e-54	0.687122	0.584	0.406	3.41684e-50	3	puc
Pvf31	2.40183e-62	0.279572	0.943	0.662	3.34647e-58	3	Pvf3
Pxn2	0	1.25959	0.983	0.539	0	3	Pxn
qvr	2.88537e-108	0.436663	0.974	0.898	4.02019e-104	3	qvr
RASSF8	5.63048e-46	0.402185	0.748	0.644	7.84494e-42	3	RASSF8
Rbp6	1.10836e-65	0.253402	0.991	0.9	1.54428e-61	3	Rbp6
rdgA	0	1.18388	0.993	0.651	0	3	rdgA
rgn1	1.23592e-207	0.897701	0.819	0.402	1.722e-203	3	rgn
ringer1	4.56875e-68	0.421129	0.968	0.916	6.36564e-64	3	ringer
roX11	1.42161e-10	0.293156	0.397	0.306	1.98072e-06	3	roX1
roX2	8.48576e-21	0.727282	0.376	0.275	1.18232e-16	3	roX2
S1	1.39893e-39	0.451578	0.581	0.451	1.94913e-35	3	S
sbb1	3.59032e-85	0.340332	0.988	0.935	5.00239e-81	3	sbb
scro1	5.45673e-142	0.555288	0.646	0.236	7.60286e-138	3	scro
scrt	5.89523e-47	0.253187	0.968	0.903	8.21382e-43	3	scrt
Sema1a	1.60504e-230	0.703446	0.999	0.947	2.2363e-226	3	Sema1a
shakB	0	0.788415	1	0.978	0	3	shakB
shn	2.81442e-14	0.265533	0.253	0.171	3.92132e-10	3	shn
side	2.83556e-195	0.756184	0.979	0.718	3.95079e-191	3	side
sky	1.0525e-72	0.494421	0.811	0.652	1.46645e-68	3	sky
smal1	1.93563e-96	0.593764	0.798	0.567	2.69691e-92	3	smal
Snoo	5.78913e-101	0.617702	0.763	0.522	8.066e-97	3	Snoo
SoxN	2.57822e-162	0.507811	0.711	0.242	3.59223e-158	3	SoxN
SP1029	1.71119e-138	0.560811	0.344	0.086	2.3842e-134	3	SP1029
Src64B	4.69246e-26	0.349674	0.553	0.464	6.53801e-22	3	Src64B
Sxl	1.8544e-25	0.283055	0.818	0.786	2.58373e-21	3	Sxl
Syx1A	5.95379e-157	0.468207	0.996	0.96	8.29542e-153	3	Syx1A
tai1	1.52993e-21	0.273612	0.712	0.655	2.13164e-17	3	tai
Ten-m1	9.202e-139	0.694532	0.87	0.605	1.28211e-134	3	Ten-m
tipE	3.18522e-19	0.316564	0.502	0.427	4.43797e-15	3	tipE
tna1	8.33939e-98	0.431653	0.98	0.902	1.16193e-93	3	tna
tok	3.39489e-57	0.401667	0.524	0.294	4.73009e-53	3	tok
Toll-61	1.01643e-206	0.881618	0.94	0.682	1.41619e-202	3	Toll-6
toy2	1.68297e-82	0.406154	0.897	0.506	2.34488e-78	3	toy
TrissinR	2.23855e-58	0.647734	0.391	0.196	3.11897e-54	3	TrissinR
trv1	1.99471e-161	0.578162	0.998	0.878	2.77923e-157	3	trv
Tsp42Ej	2.86243e-49	0.267529	0.967	0.909	3.98822e-45	3	Tsp42Ej
Tsp42El	7.92815e-298	0.68117	0.362	0.053	1.10463e-293	3	Tsp42El
Tsp47F	0	1.28997	0.351	0.006	0	3	Tsp47F
Tsp66E	2.88505e-44	0.267036	0.959	0.85	4.01974e-40	3	Tsp66E
tutl1	2.43596e-82	0.381724	0.976	0.877	3.39403e-78	3	tutl
vimar	9.94593e-38	0.378173	0.311	0.165	1.38577e-33	3	vimar
w1	1.05754e-195	1.17225	0.795	0.464	1.47347e-191	3	w
Xrp1	8.36458e-13	0.298122	0.48	0.42	1.16544e-08	3	Xrp1
zfh21	0	1.06055	0.593	0.081	0	3	zfh2
14-3-3zeta1	4.16243e-171	0.318917	1	0.978	5.79951e-167	4	14-3-3zeta
7B21	3.48171e-119	0.542993	0.994	0.907	4.85106e-115	4	7B2
alc1	3.07758e-56	0.265589	0.834	0.502	4.28799e-52	4	alc
Ald	1.55788e-176	0.655752	0.948	0.524	2.1706e-172	4	Ald
Appl1	5.4846e-86	0.354474	0.992	0.918	7.6417e-82	4	Appl
Atpalpha1	1.28785e-92	0.278717	0.999	0.99	1.79437e-88	4	Atpalpha
ATPsynCF6	3.19132e-54	0.263131	0.983	0.909	4.44646e-50	4	ATPsynCF6
ATPsynF	2.15728e-52	0.273998	0.99	0.935	3.00574e-48	4	ATPsynF
beat-IV1	5.63691e-61	0.254836	0.673	0.341	7.85391e-57	4	beat-IV
beat-Vc	9.89223e-48	0.257812	0.613	0.327	1.37828e-43	4	beat-Vc
beat-VII	7.50669e-72	0.349386	0.579	0.269	1.04591e-67	4	beat-VII
betaTub56D1	1.64252e-33	0.255744	0.996	0.917	2.28852e-29	4	betaTub56D
Blimp-11	5.28491e-122	0.346022	0.769	0.319	7.36346e-118	4	Blimp-1
blw	1.85725e-91	0.350993	0.994	0.937	2.58771e-87	4	blw
Cad87A	1.16024e-105	0.449597	0.442	0.146	1.61656e-101	4	Cad87A
CadN1	6.14446e-45	0.253771	0.982	0.853	8.56107e-41	4	CadN
Cbp53E1	1.66851e-158	0.964152	0.88	0.461	2.32473e-154	4	Cbp53E
CG108041	3.38725e-99	0.484554	0.741	0.354	4.71945e-95	4	CG10804
CG11000	1.23482e-70	0.372847	0.842	0.487	1.72048e-66	4	CG11000
CG11267	1.05712e-45	0.328341	0.923	0.695	1.47289e-41	4	CG11267
CG113171	3.82146e-67	0.278223	0.531	0.234	5.32444e-63	4	CG11317
CG12994	9.71787e-74	0.39863	0.481	0.204	1.35399e-69	4	CG12994
CG13108	6.56217e-85	0.388789	0.936	0.595	9.14308e-81	4	CG13108
CG14757	2.89036e-140	0.257329	0.335	0.076	4.02713e-136	4	CG14757
CG157652	1.12824e-29	0.275708	0.895	0.631	1.57198e-25	4	CG15765
CG1648	1.93024e-154	0.457933	0.415	0.103	2.6894e-150	4	CG1648
CG172721	3.39302e-63	0.260951	0.794	0.424	4.7275e-59	4	CG17272
CG177161	7.37712e-41	0.296837	0.884	0.594	1.02785e-36	4	CG17716
CG182081	5.34962e-25	0.302872	0.829	0.596	7.45362e-21	4	CG18208
CG22692	3.40761e-94	0.687281	0.931	0.621	4.74783e-90	4	CG2269
CG30419	7.49658e-90	0.321354	0.656	0.282	1.0445e-85	4	CG30419
CG311401	3.75512e-55	0.284135	0.958	0.762	5.23202e-51	4	CG31140
CG31221	1.30703e-13	0.35824	0.792	0.64	1.82109e-09	4	CG31221
CG318081	2.73295e-159	0.31603	0.539	0.155	3.80781e-155	4	CG31808
CG33639	3.32e-48	0.357303	0.65	0.372	4.62575e-44	4	CG33639
CG3402	4.91788e-97	0.366966	0.877	0.476	6.85208e-93	4	CG3402
CG34355	2.49959e-268	0.706274	0.6	0.14	3.48267e-264	4	CG34355
CG35561	1.66039e-72	0.313306	0.862	0.488	2.31343e-68	4	CG3556
CG422652	1.58379e-82	0.364672	0.973	0.746	2.2067e-78	4	CG42265
CG42342	1.35046e-45	0.259541	0.844	0.528	1.8816e-41	4	CG42342
CG43222	2.24978e-44	0.2505	0.951	0.72	3.13461e-40	4	CG43222
CG43411	1.46875e-60	0.299673	0.667	0.343	2.04641e-56	4	CG4341
CG4577	5.01013e-76	0.449104	0.655	0.305	6.98061e-72	4	CG4577
CG57581	3.362e-198	0.668841	0.883	0.383	4.68428e-194	4	CG5758
CG5903	2.33171e-52	0.259155	0.928	0.639	3.24877e-48	4	CG5903
CG6543	1.98349e-130	0.259726	0.547	0.176	2.76359e-126	4	CG6543
CG67701	1.605e-68	0.309234	0.989	0.894	2.23625e-64	4	CG6770
CG7920	2.32311e-60	0.274921	0.837	0.477	3.23678e-56	4	CG7920
CG9119	4.16283e-68	0.276691	0.322	0.111	5.80007e-64	4	CG9119
CG99191	4.31048e-67	0.31116	0.982	0.792	6.00579e-63	4	CG9919
ChAT	1.86686e-44	0.267795	0.584	0.324	2.6011e-40	4	ChAT
Chchd2	9.96569e-50	0.260013	0.955	0.723	1.38852e-45	4	Chchd2
chrb	2.12744e-40	0.363364	0.995	0.912	2.96416e-36	4	chrb
COX5A	1.12907e-44	0.254691	0.976	0.884	1.57313e-40	4	COX5A
COX5B	4.17289e-58	0.313916	0.964	0.844	5.81409e-54	4	COX5B
COX7C	1.16182e-40	0.250642	0.971	0.91	1.61877e-36	4	COX7C
COX8	1.97201e-40	0.262308	0.964	0.87	2.7476e-36	4	COX8
ctp1	3.82987e-96	0.307426	0.995	0.938	5.33615e-92	4	ctp
cype	2.22682e-55	0.25378	0.995	0.945	3.10263e-51	4	cype
Cyt-c-p1	2.48085e-115	0.521531	0.981	0.78	3.45656e-111	4	Cyt-c-p
Dak1	9.56817e-77	0.341511	0.904	0.557	1.33313e-72	4	Dak1
Dic1	6.00657e-117	0.374006	0.709	0.29	8.36895e-113	4	Dic1
DIP-beta1	1.01542e-13	0.365649	0.361	0.241	1.41479e-09	4	DIP-beta
Drl-2	1.85855e-54	0.316185	0.609	0.32	2.58952e-50	4	Drl-2
dUTPase	3.35201e-120	0.456884	0.658	0.257	4.67035e-116	4	dUTPase
Eno	1.99394e-143	0.548783	0.974	0.635	2.77816e-139	4	Eno
fabp	2.53701e-70	0.368596	0.968	0.813	3.53481e-66	4	fabp
Fife	6.50608e-44	0.358878	0.784	0.53	9.06491e-40	4	Fife
fne	3.97186e-75	0.259281	1	0.99	5.53399e-71	4	fne
futsch	1.37511e-99	0.39297	1	0.951	1.91595e-95	4	futsch
fwe2	4.04819e-88	0.314202	0.872	0.457	5.64035e-84	4	fwe
Gapdh1	3.37004e-97	0.421331	0.877	0.489	4.69547e-93	4	Gapdh1
Gapdh2	6.55658e-74	0.362268	0.962	0.73	9.13529e-70	4	Gapdh2
GC1	3.70029e-109	0.261349	0.452	0.143	5.15562e-105	4	GC1
Gdi	3.854e-89	0.392149	0.967	0.735	5.36978e-85	4	Gdi
GILT1	6.59569e-76	0.500575	0.313	0.103	9.18978e-72	4	GILT1
Glo1	9.02842e-155	0.358353	0.632	0.205	1.25793e-150	4	Glo1
GluRIB3	2.95456e-35	0.264722	0.854	0.611	4.11658e-31	4	GluRIB
Hasp1	8.01552e-131	0.492889	0.953	0.567	1.1168e-126	4	Hasp
hdc1	4.90008e-43	0.253705	0.75	0.449	6.82728e-39	4	hdc
Hs3st-B	8.16933e-119	0.44491	0.87	0.447	1.13823e-114	4	Hs3st-B
Hsp23	9.63951e-193	0.826487	0.985	0.765	1.34307e-188	4	Hsp23
Hsp271	7.05132e-54	0.287688	0.909	0.606	9.8246e-50	4	Hsp27
Hsp67Ba	2.97237e-150	0.653954	0.968	0.639	4.14141e-146	4	Hsp67Ba
Hsromega1	2.12126e-69	0.314874	0.999	0.976	2.95555e-65	4	Hsromega
hth1	3.20039e-43	0.318567	0.877	0.55	4.4591e-39	4	hth
IA-2	3.20972e-114	0.914461	0.967	0.718	4.47211e-110	4	IA-2
igl	3.57808e-33	0.280476	0.934	0.693	4.98534e-29	4	igl
Imp2	0	1.38029	0.963	0.162	0	4	Imp
IscU	2.15342e-47	0.264524	0.934	0.673	3.00036e-43	4	IscU
kcc1	8.60264e-102	0.404703	0.934	0.574	1.19861e-97	4	kcc
l(1)G0156	6.81203e-56	0.307701	0.895	0.617	9.4912e-52	4	l(1)G0156
Lim1	7.16054e-47	0.433007	0.341	0.155	9.97678e-43	4	Lim1
Lrp41	1.3524e-82	0.301441	0.849	0.438	1.8843e-78	4	Lrp4
mamo2	2.30348e-68	0.640293	0.84	0.512	3.20943e-64	4	mamo
mbl	2.80218e-16	0.269236	0.837	0.65	3.90427e-12	4	mbl
mei-P26	1.78038e-57	0.286711	0.987	0.909	2.4806e-53	4	mei-P26
Men	5.89212e-147	0.383433	0.658	0.229	8.20949e-143	4	Men
mGluR2	1.4296e-53	0.268326	0.613	0.321	1.99187e-49	4	mGluR
Mp2	5.28979e-72	0.567198	0.918	0.669	7.37026e-68	4	Mp
Msp300	6.48387e-103	0.433126	0.987	0.856	9.03398e-99	4	Msp300
nAChRalpha63	3.17891e-33	0.260463	0.937	0.707	4.42917e-29	4	nAChRalpha6
ND-B14.7	5.32924e-52	0.259106	0.826	0.501	7.42523e-48	4	ND-B14.7
Neb-cGP	1.63667e-66	0.312281	0.974	0.871	2.28037e-62	4	Neb-cGP
NetB	4.5831e-10	0.277045	0.53	0.412	6.38564e-06	4	NetB
Nlp	3.42602e-90	0.400039	0.927	0.579	4.77347e-86	4	Nlp
Nmdar2	4.61561e-112	0.401358	0.704	0.301	6.43093e-108	4	Nmdar2
nord	1.45773e-185	0.458684	0.446	0.103	2.03105e-181	4	nord
Nplp1	6.28171e-98	0.43371	0.517	0.197	8.75231e-94	4	Nplp1
nSyb	9.64796e-100	0.32351	0.995	0.934	1.34425e-95	4	nSyb
nwk	2.93399e-65	0.262095	0.822	0.448	4.08793e-61	4	nwk
P5CDh1	8.68162e-99	0.277529	0.632	0.253	1.20961e-94	4	P5CDh1
Pcd	2.64182e-133	0.55158	0.752	0.317	3.68085e-129	4	Pcd
Pde8	1.9321e-104	0.253516	0.516	0.181	2.692e-100	4	Pde8
Pgi	5.22282e-140	0.303077	0.545	0.169	7.27695e-136	4	Pgi
Pgk	2.06648e-135	0.508487	0.94	0.542	2.87923e-131	4	Pgk
Pglym78	1.25688e-154	0.523538	0.92	0.485	1.75121e-150	4	Pglym78
PhKgamma	4.38245e-71	0.252954	0.817	0.422	6.10607e-67	4	PhKgamma
porin	1.10765e-65	0.264185	0.996	0.962	1.54329e-61	4	porin
prim	2.97358e-76	0.311327	0.951	0.607	4.14309e-72	4	prim
PyK	7.12392e-206	0.377074	0.618	0.168	9.92575e-202	4	PyK
QIL1	2.59912e-58	0.288135	0.862	0.51	3.62135e-54	4	QIL1
Rab31	5.1567e-63	0.286471	0.905	0.585	7.18483e-59	4	Rab3
Rac1	2.1344e-59	0.281697	0.948	0.674	2.97386e-55	4	Rac1
Rbp61	8.34125e-59	0.407013	0.99	0.9	1.16219e-54	4	Rbp6
RhoGAPp190	1.19367e-65	0.296067	0.964	0.765	1.66314e-61	4	RhoGAPp190
salr	2.03063e-42	0.507519	0.253	0.104	2.82928e-38	4	salr
Sap47	9.00543e-152	0.467109	0.996	0.917	1.25473e-147	4	Sap47
Scsalpha	4.94755e-61	0.294505	0.941	0.675	6.89342e-57	4	Scsalpha
sesB	1.92105e-152	0.51747	0.992	0.918	2.6766e-148	4	sesB
SIFaR	2.42523e-96	0.268435	0.654	0.268	3.37907e-92	4	SIFaR
slgA	3.26059e-98	0.49116	0.96	0.713	4.54297e-94	4	slgA
sNPF1	1.53201e-14	0.487222	0.285	0.178	2.13455e-10	4	sNPF		Johard, Helena A. D., Lina E. Enell, Elisabeth Gustafsson, Pierre Trifilieff, Jan A. Veenstra, and Dick R. Nässel. “Intrinsic Neurons of Drosophila Mushroom Bodies Express Short Neuropeptide F: Relations to Extrinsic Neurons Expressing Different Neurotransmitters.” The Journal of Comparative Neurology 507, no. 4 (April 1, 2008): 1479–96. https://doi.org/10.1002/cne.21636.
Sod1	5.47822e-139	0.464951	0.981	0.847	7.6328e-135	4	Sod1
spab2	2.75082e-12	1.15313	0.413	0.285	3.83272e-08	4	spab
SPoCk	8.65767e-79	0.374844	0.872	0.519	1.20627e-74	4	SPoCk
ssx	2.64495e-87	0.305545	0.75	0.358	3.68521e-83	4	ssx
sun	1.00705e-47	0.280326	0.955	0.788	1.40312e-43	4	sun
Sytbeta	6.87595e-104	0.302551	0.529	0.189	9.58026e-100	4	Sytbeta
Tim8	2.35404e-54	0.260727	0.858	0.516	3.27988e-50	4	Tim8
tko	1.96112e-77	0.285182	0.817	0.422	2.73243e-73	4	tko
TM4SF1	1.38971e-66	0.303139	0.934	0.566	1.93629e-62	4	TM4SF
Tob1	6.0216e-76	0.365164	0.925	0.601	8.3899e-72	4	Tob
Tpi1	3.09263e-127	0.453375	0.868	0.436	4.30896e-123	4	Tpi
unc-13-4A	2.83991e-168	0.548091	0.733	0.266	3.95685e-164	4	unc-13-4A
UQCR-14	3.46632e-61	0.311457	0.977	0.834	4.82962e-57	4	UQCR-14
UQCR-Q	5.45554e-61	0.345114	0.962	0.845	7.6012e-57	4	UQCR-Q
VGlut	1.36662e-237	1.76857	0.519	0.127	1.90412e-233	4	VGlut
Vha26	1.16114e-48	0.256376	0.944	0.704	1.61782e-44	4	Vha26
wake	4.21991e-65	0.292998	0.423	0.173	5.8796e-61	4	wake
Wnt4	7.02573e-24	0.475907	0.268	0.135	9.78896e-20	4	Wnt4
zfh22	3.23617e-133	0.66089	0.35	0.089	4.50895e-129	4	zfh2
Ac13E	1.17494e-134	0.54433	0.39	0.111	1.63704e-130	5	Ac13E
Ace1	1.3153e-67	0.385729	0.913	0.767	1.83261e-63	5	Ace
ap1	0	1.15181	0.887	0.262	0	5	ap
AstA-R11	1.10681e-83	0.468038	0.407	0.159	1.54211e-79	5	AstA-R1
AstC-R11	4.74823e-106	0.548213	0.532	0.218	6.6157e-102	5	AstC-R1
AstC-R21	8.42155e-62	0.259205	0.678	0.4	1.17337e-57	5	AstC-R2
Atf3	1.58815e-36	0.351075	0.3	0.152	2.21277e-32	5	Atf3
Atg1	1.80601e-23	0.260259	0.648	0.54	2.51632e-19	5	Atg1
Atox12	2.19403e-53	0.261244	0.991	0.929	3.05694e-49	5	Atox1
Bacc1	7.04363e-94	0.302676	1	0.987	9.81389e-90	5	Bacc
beat-Ia1	2.90668e-99	0.30153	0.801	0.422	4.04987e-95	5	beat-Ia
beat-IIIb1	2.29137e-170	0.715465	0.895	0.503	3.19256e-166	5	beat-IIIb
beat-IV2	1.9824e-36	0.274015	0.541	0.345	2.76208e-32	5	beat-IV
beat-Va1	5.23475e-40	0.403672	0.524	0.347	7.29357e-36	5	beat-Va
beat-Vc1	6.34847e-116	0.634115	0.657	0.326	8.84533e-112	5	beat-Vc
beat-VI	2.7188e-158	0.664365	0.921	0.528	3.7881e-154	5	beat-VI
bi	0	1.37015	0.982	0.283	0	5	bi
bma1	1.74948e-163	0.654829	0.638	0.24	2.43755e-159	5	bma
brp1	2.86795e-49	0.273566	0.97	0.897	3.99591e-45	5	brp
bru11	6.83486e-61	0.403593	0.547	0.293	9.52301e-57	5	bru1
Bx2	0	1.81148	0.992	0.406	0	5	Bx
Ca-alpha1T	0	1.13859	0.973	0.523	0	5	Ca-alpha1T
CanA-14F	3.51886e-59	0.344672	0.948	0.851	4.90282e-55	5	CanA-14F
caps1	1.55307e-97	0.520833	0.804	0.505	2.16389e-93	5	caps
CCKLR-17D32	6.75209e-37	0.378089	0.475	0.289	9.40769e-33	5	CCKLR-17D3
CG10384	2.52642e-271	1.10727	0.915	0.502	3.52006e-267	5	CG10384
CG118731	8.95812e-36	0.291237	0.752	0.618	1.24813e-31	5	CG11873
CG12065	2.60106e-66	0.339917	0.282	0.095	3.62406e-62	5	CG12065
CG122901	1.63066e-86	0.561918	0.382	0.146	2.272e-82	5	CG12290
CG12484	1.56532e-214	0.847588	0.769	0.324	2.18096e-210	5	CG12484
CG12605	8.986e-56	0.365819	0.879	0.761	1.25202e-51	5	CG12605
CG129911	8.55677e-33	0.285566	0.651	0.506	1.19221e-28	5	CG12991
CG130551	1.28979e-26	0.27689	0.692	0.578	1.79706e-22	5	CG13055
CG13300	1.31595e-16	0.27438	0.395	0.294	1.83351e-12	5	CG13300
CG140241	1.81645e-148	0.799274	0.817	0.508	2.53086e-144	5	CG14024
CG140821	1.99824e-82	0.469604	0.455	0.194	2.78415e-78	5	CG14082
CG141862	4.30353e-188	0.961634	0.841	0.484	5.99611e-184	5	CG14186
CG144311	6.82005e-42	0.33968	0.359	0.184	9.50237e-38	5	CG14431
CG144591	8.9362e-98	0.444605	0.58	0.238	1.24508e-93	5	CG14459
CG147621	1.4642e-98	0.549106	0.806	0.519	2.04008e-94	5	CG14762
CG1504	1.78242e-55	0.374392	0.495	0.267	2.48344e-51	5	CG1504
CG157653	1.58847e-74	0.294132	0.922	0.63	2.21321e-70	5	CG15765
CG15894	2.15572e-27	0.338031	0.546	0.431	3.00357e-23	5	CG15894
CG1688	1.17908e-72	0.431653	0.581	0.299	1.64282e-68	5	CG1688
CG17075	1.44858e-26	0.336446	0.386	0.254	2.0183e-22	5	CG17075
CG171241	1.37748e-232	0.708406	0.993	0.862	1.91925e-228	5	CG17124
CG2201	3.81512e-33	0.321016	0.482	0.312	5.31561e-29	5	CG2201
CG2865	6.32439e-35	0.388786	0.597	0.454	8.81177e-31	5	CG2865
CG304191	8.08177e-41	0.324187	0.481	0.288	1.12603e-36	5	CG30419
CG31041	2.36146e-19	0.251147	0.403	0.292	3.29023e-15	5	CG3104
CG311402	3.99785e-37	0.308992	0.891	0.764	5.5702e-33	5	CG31140
CG312211	0	1.46768	0.999	0.633	0	5	CG31221
CG31323	4.49053e-25	0.2603	0.36	0.22	6.25666e-21	5	CG31323
CG31324	3.62881e-193	0.873629	0.756	0.338	5.05602e-189	5	CG31324
CG316761	1.17469e-140	0.604337	0.632	0.232	1.6367e-136	5	CG31676
CG32486	8.40609e-48	0.424662	0.657	0.498	1.17122e-43	5	CG32486
CG325061	1.06188e-29	0.399101	0.593	0.459	1.47951e-25	5	CG32506
CG326471	1.40107e-19	0.250496	0.507	0.4	1.95211e-15	5	CG32647
CG327671	8.84223e-40	0.300482	0.896	0.806	1.23199e-35	5	CG32767
CG32982	1.50331e-70	0.415681	0.684	0.416	2.09456e-66	5	CG32982
CG331431	1.55096e-132	0.627239	0.921	0.682	2.16095e-128	5	CG33143
CG33181	6.71937e-30	0.291721	0.518	0.357	9.36209e-26	5	CG33181
CG341141	1.80284e-126	0.573022	0.93	0.679	2.51189e-122	5	CG34114
CG343542	5.10837e-63	0.364638	0.901	0.672	7.11749e-59	5	CG34354
CG343831	1.40112e-105	0.484637	0.932	0.729	1.95218e-101	5	CG34383
CG343841	1.74205e-27	0.296436	0.493	0.346	2.42719e-23	5	CG34384
CG344011	2.82442e-106	0.500786	0.928	0.79	3.93527e-102	5	CG34401
CG3638	1.31399e-74	0.45883	0.847	0.683	1.83079e-70	5	CG3638
CG36551	2.0139e-66	0.442087	0.618	0.359	2.80597e-62	5	CG3655
CG37261	1.74052e-147	0.734499	0.779	0.399	2.42506e-143	5	CG3726
CG3967	2.52792e-18	0.293888	0.681	0.619	3.52215e-14	5	CG3967
CG423132	3.56119e-156	0.666821	0.977	0.735	4.96181e-152	5	CG42313
CG42322	1.95163e-35	0.37599	0.59	0.452	2.71921e-31	5	CG42322
CG423402	6.37952e-54	0.294042	0.893	0.701	8.88859e-50	5	CG42340
CG423461	2.74954e-62	0.465745	0.521	0.288	3.83094e-58	5	CG42346
CG423921	3.97525e-25	0.318589	0.329	0.2	5.53872e-21	5	CG42392
CG42450	1.31242e-28	0.267488	0.827	0.756	1.8286e-24	5	CG42450
CG42492	7.63881e-102	0.289394	0.999	0.981	1.06432e-97	5	CG42492
CG42594	1.77045e-175	0.7269	0.854	0.481	2.46677e-171	5	CG42594
CG426681	9.43099e-30	0.252029	0.717	0.598	1.31402e-25	5	CG42668
CG426741	2.45432e-67	0.44781	0.791	0.576	3.4196e-63	5	CG42674
CG427501	4.2571e-187	0.708282	0.97	0.673	5.93142e-183	5	CG42750
CG42784	8.31567e-15	0.267869	0.294	0.207	1.15862e-10	5	CG42784
CG43066	1.69614e-35	0.367767	0.592	0.45	2.36323e-31	5	CG43066
CG431431	1.86678e-58	0.399807	0.752	0.543	2.60099e-54	5	CG43143
CG43347	1.0603e-39	0.342092	0.663	0.511	1.47732e-35	5	CG43347
CG436581	1.75126e-132	0.492017	0.927	0.564	2.44003e-128	5	CG43658
CG437371	1.59097e-166	0.632524	0.98	0.79	2.2167e-162	5	CG43737
CG43759	1.74014e-277	1.02711	0.905	0.411	2.42454e-273	5	CG43759
CG43778	5.04111e-18	0.289273	0.436	0.337	7.02378e-14	5	CG43778
CG45771	5.03173e-26	0.368009	0.449	0.312	7.01071e-22	5	CG4577
CG60241	4.06362e-70	0.443872	0.839	0.676	5.66184e-66	5	CG6024
CG6051	6.4932e-21	0.278388	0.272	0.164	9.04698e-17	5	CG6051
CG6959	9.91964e-142	0.747474	0.789	0.431	1.3821e-137	5	CG6959
CG7991	1.75628e-89	0.552081	0.659	0.356	2.44702e-85	5	CG7991
CG8500	1.58391e-35	0.329764	0.636	0.486	2.20686e-31	5	CG8500
CG8641	1.84084e-64	0.441826	0.482	0.248	2.56484e-60	5	CG8641
CG8677	1.21152e-24	0.280176	0.616	0.509	1.68801e-20	5	CG8677
CG89102	6.56481e-39	0.365905	0.492	0.309	9.14675e-35	5	CG8910
CG9170	9.0838e-24	0.266062	0.68	0.596	1.26565e-19	5	CG9170
CG93281	1.06719e-39	0.411082	0.475	0.305	1.48691e-35	5	CG9328
CG9425	5.95542e-27	0.278072	0.74	0.642	8.29769e-23	5	CG9425
CG96501	4.78691e-168	0.488569	0.863	0.331	6.6696e-164	5	CG9650
CG9821	1.14086e-80	0.250947	0.999	0.984	1.58956e-76	5	CG9821
chb	1.88852e-23	0.288479	0.516	0.406	2.63128e-19	5	chb
chinmo1	6.4281e-110	0.47449	0.987	0.906	8.95627e-106	5	chinmo
chrb1	1.29168e-74	0.365118	0.992	0.912	1.79969e-70	5	chrb
Con1	1.37452e-65	0.280091	0.938	0.624	1.91512e-61	5	Con
corto	4.15973e-126	0.600129	0.904	0.693	5.79575e-122	5	corto
cpo1	7.2725e-79	0.326593	0.995	0.932	1.01328e-74	5	cpo
CR31451	3.87253e-215	0.630612	0.997	0.924	5.3956e-211	5	CR31451
CR42862	7.898e-78	0.374809	0.979	0.922	1.10043e-73	5	CR42862
CR443201	2.29868e-95	0.49857	0.342	0.112	3.20276e-91	5	CR44320
CR44997	6.08856e-44	0.363167	0.286	0.13	8.48319e-40	5	CR44997
CR457581	1.54244e-199	0.926352	0.954	0.695	2.14908e-195	5	CR45758
CR460061	5.72713e-79	0.497294	0.46	0.195	7.97962e-75	5	CR46006
Csk	4.05903e-44	0.344308	0.762	0.622	5.65544e-40	5	Csk
csw	5.97716e-65	0.428464	0.831	0.657	8.32798e-61	5	csw
ct1	0	1.36377	0.958	0.267	0	5	ct
CycG1	2.53187e-57	0.308067	0.957	0.868	3.52765e-53	5	CycG
Dgk	2.07217e-29	0.359648	0.388	0.244	2.88715e-25	5	Dgk
Dh44-R1	6.95281e-69	0.417902	0.291	0.102	9.68735e-65	5	Dh44-R1
DIP-beta2	0	0.970961	0.814	0.227	0	5	DIP-beta
Dmtn1	6.20158e-52	0.419272	0.588	0.386	8.64067e-48	5	Dmtn
dnc2	6.76091e-113	0.427591	0.99	0.913	9.41998e-109	5	dnc
dpr101	1.2115e-75	0.423903	0.658	0.364	1.68799e-71	5	dpr10
dpr121	9.37496e-65	0.373001	0.891	0.724	1.30621e-60	5	dpr12
dpr151	1.19396e-63	0.442864	0.524	0.286	1.66354e-59	5	dpr15
dpr31	1.43841e-26	0.290892	0.463	0.308	2.00414e-22	5	dpr3
dpr41	2.98397e-25	0.275616	0.562	0.434	4.15757e-21	5	dpr4
dpr61	3.14048e-55	0.326974	0.797	0.562	4.37563e-51	5	dpr6
dpr91	1.49753e-119	0.553233	0.923	0.635	2.0865e-115	5	dpr9
Drak	1.68893e-35	0.330523	0.614	0.459	2.35319e-31	5	Drak
Drep1	7.3433e-99	0.717192	0.662	0.404	1.02314e-94	5	Drep1
Drep3	9.88874e-84	0.584303	0.389	0.158	1.3778e-79	5	Drep3
drongo	6.13489e-31	0.338853	0.401	0.257	8.54775e-27	5	drongo
Dscam21	2.392e-107	0.344477	1	0.96	3.33277e-103	5	Dscam2
dtn1	4.04472e-28	0.252198	0.775	0.667	5.63551e-24	5	dtn
Dyrk2	2.27174e-25	0.339149	0.65	0.541	3.16521e-21	5	Dyrk2
dysc1	6.89424e-116	0.40745	0.995	0.939	9.60575e-112	5	dysc
eag1	1.17124e-279	1.02344	0.915	0.474	1.63189e-275	5	eag
east	2.97781e-36	0.344498	0.667	0.527	4.14899e-32	5	east
Efa61	2.02866e-54	0.477367	0.545	0.353	2.82653e-50	5	Efa6
eIF4EHP1	4.21908e-40	0.28936	0.901	0.778	5.87845e-36	5	eIF4EHP
Eip93F1	3.67868e-126	0.729388	0.906	0.495	5.12551e-122	5	Eip93F
elav	2.73465e-30	0.272069	0.856	0.775	3.81019e-26	5	elav
elB	3.25294e-30	0.367781	0.549	0.406	4.53233e-26	5	elB
ena	4.41295e-62	0.388683	0.857	0.711	6.14857e-58	5	ena
eys2	3.8449e-197	0.7942	0.978	0.625	5.3571e-193	5	eys
Fas3	2.87695e-145	0.541704	0.915	0.493	4.00846e-141	5	Fas3
fax	5.80365e-100	0.282446	1	0.988	8.08623e-96	5	fax
Fife1	1.48819e-187	0.7933	0.91	0.527	2.07349e-183	5	Fife
Fili1	1.6341e-27	0.264353	0.411	0.26	2.27679e-23	5	Fili
fra	1.27187e-32	0.278673	0.537	0.374	1.7721e-28	5	fra
Frq1	1.44151e-92	0.381914	0.99	0.867	2.00845e-88	5	Frq1
Frq21	7.49913e-133	0.616485	0.926	0.69	1.04485e-128	5	Frq2
fru1	1.02524e-124	0.401915	0.993	0.894	1.42847e-120	5	fru
fs(1)h1	5.86742e-50	0.279412	0.956	0.91	8.17508e-46	5	fs(1)h
fwd	1.06147e-24	0.329568	0.557	0.448	1.47895e-20	5	fwd
GABA-B-R3	1.72581e-232	0.931336	0.61	0.187	2.40456e-228	5	GABA-B-R3
GFP2	3.84908e-197	0.786146	0.986	0.835	5.36293e-193	5	GFP
Gk2	1.4027e-36	0.365734	0.333	0.179	1.95438e-32	5	Gk2
GluClalpha2	7.45528e-248	0.782339	0.993	0.899	1.03874e-243	5	GluClalpha
gpp2	5.94113e-38	0.266651	0.821	0.707	8.27778e-34	5	gpp
Gprk2	1.08198e-77	0.414085	0.905	0.749	1.50752e-73	5	Gprk2
Gycbeta100B2	1.95497e-25	0.299277	0.421	0.282	2.72386e-21	5	Gycbeta100B
haf	2.37911e-48	0.318094	0.341	0.159	3.31481e-44	5	haf
ham1	4.50747e-306	0.831619	0.728	0.182	6.28026e-302	5	ham
Hex-A	5.25326e-143	0.885142	0.826	0.562	7.31937e-139	5	Hex-A
hig	3.31279e-241	1.43709	0.793	0.367	4.61571e-237	5	hig
Hipk	1.74303e-29	0.260025	0.84	0.73	2.42856e-25	5	Hipk
Hr382	2.47568e-195	1.73793	0.835	0.51	3.44937e-191	5	Hr38
Hrb27C	2.17229e-67	0.294305	0.993	0.94	3.02665e-63	5	Hrb27C
Hs3st-A1	1.44817e-193	0.753079	0.974	0.737	2.01774e-189	5	Hs3st-A
Hsromega2	1.42461e-67	0.294675	1	0.976	1.98491e-63	5	Hsromega
hwt1	2.13073e-56	0.33698	0.917	0.8	2.96874e-52	5	hwt
inaE1	8.19735e-66	0.473514	0.739	0.562	1.14214e-61	5	inaE
IntS6	1.3946e-19	0.263676	0.33	0.218	1.9431e-15	5	IntS6
jeb1	4.86883e-157	0.710092	0.938	0.725	6.78374e-153	5	jeb
jing1	3.06951e-21	0.287062	0.388	0.269	4.27675e-17	5	jing
kay1	3.43729e-136	0.771381	0.564	0.231	4.78917e-132	5	kay
KCNQ	4.95943e-36	0.304668	0.256	0.117	6.90997e-32	5	KCNQ
kek11	1.04873e-183	0.690641	0.988	0.799	1.46119e-179	5	kek1
kek2	5.74416e-78	0.333468	0.951	0.747	8.00333e-74	5	kek2
kek5	2.07495e-64	0.520061	0.542	0.321	2.89103e-60	5	kek5
Khc-73	1.26237e-16	0.256937	0.564	0.493	1.75887e-12	5	Khc-73
klg1	8.00811e-172	0.550584	0.999	0.746	1.11577e-167	5	klg
kune	8.14428e-82	0.49269	0.546	0.28	1.13474e-77	5	kune
l(3)L1231	9.85274e-38	0.337714	0.7	0.569	1.37278e-33	5	l(3)L1231
l(3)neo381	1.60843e-43	0.376303	0.658	0.48	2.24103e-39	5	l(3)neo38
Lar2	2.21405e-181	0.617439	0.983	0.906	3.08484e-177	5	Lar
larp1	1.8428e-30	0.31861	0.697	0.593	2.56757e-26	5	larp
lbk2	4.19438e-75	0.501491	0.745	0.523	5.84403e-71	5	lbk
luna	1.93819e-118	0.562219	0.939	0.689	2.70048e-114	5	luna
mAChR-A	3.9149e-60	0.407405	0.815	0.66	5.45463e-56	5	mAChR-A
mamo3	2.94314e-191	0.82104	0.936	0.51	4.10068e-187	5	mamo
mGluR3	1.51508e-56	0.415975	0.568	0.322	2.11096e-52	5	mGluR
Mical2	3.85525e-42	0.412624	0.49	0.319	5.37152e-38	5	Mical
Mid1	1.23383e-123	0.619073	0.923	0.765	1.71909e-119	5	Mid1
Mkp31	1.17191e-197	1.10999	0.866	0.516	1.63282e-193	5	Mkp3
mmd	2.7016e-43	0.284741	0.932	0.843	3.76414e-39	5	mmd
Mmp2	1.65637e-118	0.647344	0.694	0.374	2.30783e-114	5	Mmp2
mnb1	2.0612e-72	0.328668	0.958	0.89	2.87186e-68	5	mnb
mspo1	5.74211e-160	0.662134	0.951	0.67	8.00048e-156	5	mspo
nAChRalpha1	1.43574e-83	0.43572	0.936	0.818	2.00042e-79	5	nAChRalpha1
nAChRalpha31	4.42076e-23	0.254999	0.64	0.483	6.15944e-19	5	nAChRalpha3
nAChRalpha51	3.98857e-103	0.300445	0.999	0.973	5.55728e-99	5	nAChRalpha5
NaCP60E2	3.41858e-53	0.287502	0.953	0.868	4.76311e-49	5	NaCP60E
Nckx30C1	5.82497e-40	0.253766	0.954	0.875	8.11593e-36	5	Nckx30C
nej	1.26013e-53	0.398248	0.806	0.667	1.75574e-49	5	nej
Neto	5.82616e-66	0.400671	0.402	0.18	8.11759e-62	5	Neto
NK7.1	4.24488e-120	0.660052	0.75	0.412	5.91439e-116	5	NK7.1
Nlg21	4.91357e-96	0.484555	0.904	0.697	6.84607e-92	5	Nlg2
Nlg32	8.76546e-67	0.292926	0.986	0.886	1.22129e-62	5	Nlg3
nmo1	7.34257e-113	0.494328	0.987	0.914	1.02304e-108	5	nmo
Nna1	4.477e-246	0.674306	0.438	0.086	6.2378e-242	5	Nna1
nrm1	2.07527e-188	0.855043	0.949	0.698	2.89147e-184	5	nrm
numb2	2.91229e-23	0.293531	0.521	0.405	4.05769e-19	5	numb
Oct-TyrR1	1.0828e-95	0.477976	0.779	0.448	1.50867e-91	5	Oct-TyrR
orb2	6.82582e-43	0.291927	0.953	0.837	9.51042e-39	5	orb2
Pak3	3.27101e-18	0.257591	0.571	0.495	4.5575e-14	5	Pak3
para1	4.75754e-143	0.389714	0.996	0.974	6.62868e-139	5	para
Pde61	1.38456e-54	0.295685	0.949	0.756	1.9291e-50	5	Pde6
Pdk11	4.72701e-15	0.267047	0.407	0.32	6.58614e-11	5	Pdk1
pgant22	7.23933e-46	0.354296	0.616	0.401	1.00866e-41	5	pgant2
phyl1	1.31241e-109	0.626516	0.762	0.483	1.82858e-105	5	phyl
pico	3.27495e-39	0.283671	0.836	0.746	4.56299e-35	5	pico
plum1	2.30421e-94	0.545184	0.722	0.434	3.21046e-90	5	plum
plx1	3.58119e-72	0.51933	0.646	0.411	4.98967e-68	5	plx
prage1	4.4826e-255	0.832399	0.572	0.148	6.24561e-251	5	prage
Psc	3.03109e-113	0.637637	0.789	0.504	4.22321e-109	5	Psc
Ptp99A1	4.95074e-264	0.8219	0.996	0.881	6.89786e-260	5	Ptp99A
puc2	1.60693e-234	1.05731	0.835	0.398	2.23893e-230	5	puc
put	9.20937e-29	0.37463	0.489	0.358	1.28314e-24	5	put
px	1.18618e-81	0.470759	0.895	0.716	1.6527e-77	5	px
qvr1	5.61081e-69	0.326617	0.965	0.898	7.81754e-65	5	qvr
RapGAP1	5.37474e-125	0.516385	0.967	0.777	7.48863e-121	5	RapGAP1
Rbp9	4.58555e-84	0.349365	0.991	0.922	6.38905e-80	5	Rbp9
rdgA1	1.56843e-190	0.750659	0.98	0.652	2.1853e-186	5	rdgA
Rdl	1.23748e-146	0.349955	0.999	0.987	1.72418e-142	5	Rdl
Reph	4.79429e-37	0.319619	0.788	0.673	6.67988e-33	5	Reph
Rgk31	6.71832e-55	0.427758	0.588	0.357	9.36063e-51	5	Rgk3
rgn2	7.10008e-64	0.413173	0.675	0.407	9.89253e-60	5	rgn
RhoGAP100F	5.2622e-43	0.254691	0.954	0.892	7.33182e-39	5	RhoGAP100F
RhoGAP19D	4.72454e-44	0.366015	0.726	0.583	6.5827e-40	5	RhoGAP19D
RhoGAP71E	8.25287e-43	0.324508	0.798	0.671	1.14987e-38	5	RhoGAP71E
Rim1	1.5571e-91	0.400307	0.98	0.899	2.16951e-87	5	Rim
rudhira1	1.48102e-30	0.286554	0.779	0.692	2.0635e-26	5	rudhira
sano	4.25477e-59	0.307754	0.433	0.203	5.92817e-55	5	sano
sca1	4.9437e-30	0.283276	0.51	0.338	6.88805e-26	5	sca
scrt1	7.40546e-136	0.51073	0.984	0.903	1.0318e-131	5	scrt
scyl2	6.0131e-107	0.552757	0.936	0.762	8.37805e-103	5	scyl
sd	4.86376e-40	0.292829	0.865	0.786	6.77668e-36	5	sd
Sema1a1	1.36119e-118	0.407646	0.996	0.947	1.89654e-114	5	Sema1a
Sh	1.80657e-124	0.374738	0.999	0.977	2.51709e-120	5	Sh
Shaw	1.79845e-55	0.44496	0.745	0.593	2.50579e-51	5	Shaw
Shawl2	1.42295e-29	0.289077	0.541	0.377	1.98259e-25	5	Shawl
shn1	2.07105e-23	0.296481	0.287	0.17	2.8856e-19	5	shn
sif	1.579e-52	0.390388	0.765	0.572	2.20003e-48	5	sif
Sik3	6.07091e-25	0.336758	0.351	0.228	8.45859e-21	5	Sik3
sima1	6.51074e-23	0.25642	0.645	0.553	9.07142e-19	5	sima
Sirt1	2.67175e-85	0.537141	0.762	0.542	3.72255e-81	5	Sirt1
SK	1.88857e-169	0.649423	0.969	0.765	2.63134e-165	5	SK
sky1	4.57058e-147	0.650761	0.913	0.65	6.36818e-143	5	sky
sm	3.08541e-68	0.277077	0.995	0.956	4.2989e-64	5	sm
smal2	1.66638e-97	0.488675	0.845	0.566	2.32177e-93	5	smal
Snap25	7.53603e-96	0.42404	0.977	0.866	1.04999e-91	5	Snap25
Snoo1	2.08677e-54	0.393522	0.726	0.523	2.90749e-50	5	Snoo
sosie	2.99237e-292	0.668415	0.293	0.032	4.16927e-288	5	sosie
spen	8.58445e-144	0.456847	0.993	0.953	1.19607e-139	5	spen
St3	2.20027e-17	0.258807	0.52	0.419	3.06563e-13	5	St3
sty1	1.7015e-39	0.609342	0.653	0.5	2.3707e-35	5	sty
Sxl1	5.44384e-111	0.519192	0.932	0.782	7.58491e-107	5	Sxl
Syp	4.08502e-76	0.324436	0.991	0.909	5.69166e-72	5	Syp
Syx1A1	1.13661e-64	0.283312	0.996	0.96	1.58364e-60	5	Syx1A
tai2	9.35692e-53	0.375642	0.802	0.653	1.3037e-48	5	tai
tara1	3.00343e-33	0.372343	0.489	0.345	4.18467e-29	5	tara
Teh1	1.4133e-93	0.479186	0.849	0.61	1.96915e-89	5	Teh1
Ten-a1	3.58775e-90	0.30125	0.999	0.961	4.99882e-86	5	Ten-a
Ten-m2	3.35202e-51	0.342936	0.802	0.608	4.67037e-47	5	Ten-m
Tet	2.8997e-156	0.578326	0.984	0.87	4.04015e-152	5	Tet
Toll-62	9.39786e-100	0.51254	0.926	0.683	1.3094e-95	5	Toll-6
toy3	6.44508e-260	0.938723	0.978	0.505	8.97993e-256	5	toy
Trf21	1.39675e-55	0.398948	0.845	0.701	1.9461e-51	5	Trf2
Trim91	1.91216e-256	0.985533	0.915	0.472	2.66422e-252	5	Trim9
trn2	6.08194e-90	0.439021	0.785	0.474	8.47397e-86	5	trn
trv2	1.15723e-82	0.344667	0.997	0.878	1.61237e-78	5	trv
ttv	1.9083e-44	0.347586	0.796	0.662	2.65883e-40	5	ttv
tutl2	1.17989e-91	0.403011	0.978	0.877	1.64394e-87	5	tutl
TyrR	1.1851e-38	0.32981	0.391	0.216	1.6512e-34	5	TyrR
Ubi-p63E	5.34375e-17	0.257852	0.554	0.474	7.44544e-13	5	Ubi-p63E
unc-1041	2.93504e-32	0.313713	0.8	0.692	4.08939e-28	5	unc-104
upSET1	7.3416e-22	0.254732	0.659	0.562	1.02291e-17	5	upSET
VhaAC45	3.64088e-48	0.423495	0.598	0.423	5.07284e-44	5	VhaAC45
w2	5.71841e-64	0.403	0.727	0.467	7.96746e-60	5	w
wake1	1.46179e-43	0.354967	0.351	0.176	2.03672e-39	5	wake
wry1	1.37265e-58	0.352579	0.828	0.627	1.91251e-54	5	wry
X11Lbeta1	4.11053e-67	0.403604	0.831	0.613	5.72721e-63	5	X11Lbeta
Xpc	7.45295e-14	0.254256	0.352	0.269	1.03842e-09	5	Xpc
Xrp11	1.65436e-36	0.398144	0.581	0.417	2.30502e-32	5	Xrp1
5-HT1A1	0	1.71223	0.985	0.524	0	6	5-HT1A
Ac78C2	1.49472e-28	0.425826	0.383	0.247	2.0826e-24	6	Ac78C
Akap200	6.5019e-11	0.276886	0.602	0.64	9.05909e-07	6	Akap200
alpha-Man-Ia1	8.32262e-40	0.612793	0.406	0.265	1.15959e-35	6	alpha-Man-Ia
ap2	7.07209e-123	0.763529	0.618	0.27	9.85354e-119	6	ap
AstC-R12	1.18924e-103	0.840467	0.493	0.22	1.65697e-99	6	AstC-R1
AstC-R22	5.55667e-187	1.19892	0.765	0.398	7.74212e-183	6	AstC-R2
Atox13	3.27271e-201	0.632815	0.992	0.929	4.55987e-197	6	Atox1
B52	1.91424e-15	0.25088	0.759	0.81	2.66711e-11	6	B52
beat-IIIb2	3.461e-140	0.841726	0.796	0.506	4.82222e-136	6	beat-IIIb
bru32	1.84178e-267	0.940158	0.992	0.797	2.56615e-263	6	bru3
Ca-alpha1T1	3.2656e-51	0.446933	0.728	0.531	4.54996e-47	6	Ca-alpha1T
CaBP12	1.95115e-12	0.312797	0.509	0.519	2.71854e-08	6	CaBP1
CadN21	0.00216306	0.257303	0.351	0.378	1	6	CadN2
Calr2	1.0264e-25	0.287077	0.874	0.854	1.43008e-21	6	Calr
CanB21	7.80982e-116	0.506384	0.969	0.888	1.08814e-111	6	CanB2
caps2	3.75946e-61	0.598485	0.669	0.51	5.23806e-57	6	caps
cdi1	1.39683e-54	0.50284	0.765	0.733	1.9462e-50	6	cdi
CG10257	2.07296e-102	0.618768	0.264	0.067	2.88826e-98	6	CG10257
CG113172	1.65022e-07	0.322983	0.284	0.242	0.00229925	6	CG11317
CG11360	4.33974e-22	0.256966	0.832	0.856	6.04655e-18	6	CG11360
CG129912	3.32854e-08	0.326039	0.473	0.512	0.000463766	6	CG12991
CG136851	4.61911e-110	0.960562	0.708	0.504	6.43581e-106	6	CG13685
CG137391	1.32098e-117	0.722473	0.657	0.332	1.84052e-113	6	CG13739
CG139202	2.61902e-141	0.546958	0.989	0.942	3.64909e-137	6	CG13920
CG140242	6.84578e-63	0.630113	0.657	0.513	9.53823e-59	6	CG14024
CG143211	9.65074e-28	0.357655	0.704	0.725	1.34464e-23	6	CG14321
CG145091	3.59551e-89	0.400496	0.962	0.889	5.00963e-85	6	CG14509
CG145351	1.18659e-20	0.461809	0.48	0.423	1.65327e-16	6	CG14535
CG147151	9.38127e-27	0.419173	0.563	0.513	1.30709e-22	6	CG14715
CG148532	1.08988e-31	0.569603	0.358	0.233	1.51853e-27	6	CG14853
CG155221	3.32163e-45	0.637091	0.551	0.405	4.62803e-41	6	CG15522
CG171242	1.1153e-34	0.321557	0.891	0.865	1.55394e-30	6	CG17124
CG172701	6.21052e-99	0.578531	0.865	0.78	8.65312e-95	6	CG17270
CG30089	4.43761e-27	0.501059	0.387	0.274	6.18292e-23	6	CG30089
CG301163	2.24278e-17	0.323101	0.599	0.554	3.12487e-13	6	CG30116
CG301721	3.92387e-97	0.343963	0.992	0.969	5.46713e-93	6	CG30172
CG304632	2.86222e-126	0.76824	0.82	0.578	3.98793e-122	6	CG30463
CG314601	0.00528407	0.269852	0.336	0.371	1	6	CG31460
CG316371	8.37854e-12	0.280629	0.529	0.519	1.16738e-07	6	CG31637
CG323691	3.86539e-12	0.443724	0.42	0.401	5.38565e-08	6	CG32369
CG325062	5.6092e-16	0.390052	0.495	0.463	7.81529e-12	6	CG32506
CG325211	5.95286e-111	0.756028	0.642	0.349	8.29412e-107	6	CG32521
CG331432	2.48337e-29	0.383357	0.725	0.688	3.46009e-25	6	CG33143
CG339771	2.29959e-12	0.305662	0.548	0.588	3.20403e-08	6	CG33977
CG341131	4.14882e-233	0.953199	0.975	0.769	5.78055e-229	6	CG34113
CG341142	1.28418e-20	0.265726	0.747	0.685	1.78924e-16	6	CG34114
CG341361	0	1.60868	0.953	0.545	0	6	CG34136
CG341552	1.50836e-97	0.717724	0.672	0.383	2.1016e-93	6	CG34155
CG34347	2.16122e-18	0.401985	0.351	0.256	3.01123e-14	6	CG34347
CG34351	9.07011e-54	0.599223	0.306	0.136	1.26374e-49	6	CG34351
CG343531	0	1.60827	0.995	0.654	0	6	CG34353
CG343543	3.26005e-191	0.905368	0.925	0.671	4.54223e-187	6	CG34354
CG343711	6.76006e-74	0.65751	0.615	0.393	9.41879e-70	6	CG34371
CG343842	8.33287e-10	0.35415	0.381	0.349	1.16102e-05	6	CG34384
CG36552	8.17624e-17	0.444156	0.436	0.365	1.13919e-12	6	CG3655
CG37262	7.99978e-14	0.303224	0.476	0.408	1.11461e-09	6	CG3726
CG40498	1.28879e-15	0.260216	0.753	0.803	1.79567e-11	6	CG40498
CG423133	5.14345e-85	0.510352	0.925	0.737	7.16637e-81	6	CG42313
CG423242	1.09871e-21	0.480623	0.442	0.373	1.53083e-17	6	CG42324
CG423391	3.62627e-76	0.694595	0.58	0.352	5.05248e-72	6	CG42339
CG423891	2.47316e-167	0.858044	0.894	0.675	3.44585e-163	6	CG42389
CG425401	1.13107e-266	0.980183	0.995	0.921	1.57591e-262	6	CG42540
CG425413	3.89579e-98	0.597603	0.937	0.81	5.428e-94	6	CG42541
CG426731	2.9548e-15	0.30172	0.374	0.288	4.11693e-11	6	CG42673
CG437291	1.43825e-133	0.606509	0.964	0.856	2.00391e-129	6	CG43729
CG441531	3.29383e-50	0.436147	0.709	0.538	4.58929e-46	6	CG44153
CG44422	3.76272e-12	0.30349	0.575	0.543	5.2426e-08	6	CG44422
CG48292	0	1.35234	0.747	0.228	0	6	CG4829
CG60242	6.16669e-98	0.665163	0.807	0.677	8.59205e-94	6	CG6024
CG6154	2.00565e-56	0.662966	0.536	0.352	2.79447e-52	6	CG6154
CG83001	2.33959e-06	0.320285	0.342	0.337	0.0325975	6	CG8300
CG91091	0	1.39164	0.708	0.112	0	6	CG9109
CG96502	1.07306e-54	0.278105	0.631	0.338	1.49509e-50	6	CG9650
CG9932	2.27399e-36	0.405374	0.597	0.462	3.16835e-32	6	CG9932
cmpy1	0	1.44465	0.997	0.79	0	6	cmpy
CR453122	9.16381e-68	0.621015	0.641	0.448	1.27679e-63	6	CR45312
CR457582	3.86262e-105	0.662901	0.851	0.698	5.38179e-101	6	CR45758
ct2	4.0102e-46	0.341636	0.524	0.281	5.58741e-42	6	ct
Dh31	0	2.37758	0.988	0.15	0	6	Dh31
dlp1	2.19655e-154	0.962914	0.509	0.185	3.06045e-150	6	dlp
dnc3	1.00594e-44	0.375204	0.917	0.916	1.40158e-40	6	dnc
DOR	6.19013e-24	0.366733	0.706	0.735	8.62471e-20	6	DOR
dpr132	4.00764e-202	0.981296	0.954	0.664	5.58384e-198	6	dpr13
dpr141	3.11526e-12	0.27145	0.662	0.723	4.34049e-08	6	dpr14
dpr16	8.0542e-127	0.932565	0.504	0.212	1.12219e-122	6	dpr16
dpr171	0	1.68072	0.895	0.371	0	6	dpr17
dpr181	5.99577e-114	0.863707	0.583	0.304	8.3539e-110	6	dpr18
dpr201	3.41781e-16	0.400123	0.381	0.298	4.76203e-12	6	dpr20
dpr211	6.99205e-37	0.348844	0.845	0.838	9.74203e-33	6	dpr21
dpr42	5.80635e-22	0.465282	0.483	0.436	8.08998e-18	6	dpr4
dpr51	4.76072e-77	0.688689	0.619	0.398	6.63311e-73	6	dpr5
Dscam22	2.079e-114	0.451868	0.996	0.96	2.89667e-110	6	Dscam2
Dscam41	2.24056e-97	0.565986	0.874	0.734	3.12177e-93	6	Dscam4
Dys1	1.01537e-25	0.442282	0.544	0.487	1.41471e-21	6	Dys
eEF5	4.38663e-93	0.339711	0.997	0.972	6.11189e-89	6	eEF5
Efa62	0.000202526	0.323823	0.342	0.359	1	6	Efa6
Eip78C	1.13303e-100	0.632567	0.878	0.769	1.57865e-96	6	Eip78C
emc3	5.31783e-16	0.255078	0.696	0.68	7.40934e-12	6	emc
Flo12	6.48493e-14	0.324554	0.504	0.496	9.03546e-10	6	Flo1
ftz-f11	5.32219e-107	0.862116	0.664	0.398	7.4154e-103	6	ftz-f1
fz21	4.08039e-99	0.608866	0.889	0.772	5.6852e-95	6	fz2
GluClalpha3	4.6274e-107	0.556851	0.962	0.9	6.44736e-103	6	GluClalpha
gpp3	1.25795e-22	0.44931	0.668	0.711	1.75271e-18	6	gpp
Gycbeta100B3	0.000117721	0.298291	0.296	0.286	1	6	Gycbeta100B
ham2	0	1.48785	0.83	0.179	0	6	ham
hbs1	8.24453e-158	1.02165	0.646	0.306	1.14871e-153	6	hbs
hdc2	3.8915e-20	0.513481	0.543	0.456	5.42203e-16	6	hdc
heph	1.47076e-72	0.261399	0.913	0.718	2.04921e-68	6	heph
hig1	9.16406e-188	0.953953	0.763	0.368	1.27683e-183	6	hig
HmgD1	1.19695e-46	0.48698	0.761	0.715	1.6677e-42	6	HmgD
Hs3st-A2	1.19098e-38	0.392985	0.816	0.742	1.65939e-34	6	Hs3st-A
Hsp67Bc1	7.4497e-154	0.459259	0.997	0.993	1.03797e-149	6	Hsp67Bc
hwt2	4.45063e-20	0.273649	0.776	0.805	6.20106e-16	6	hwt
JIL-11	2.55102e-09	0.282241	0.521	0.572	3.55434e-05	6	JIL-1
Kank	0.000414223	0.576986	0.349	0.385	1	6	Kank
kek12	4.69853e-32	0.360021	0.858	0.804	6.54646e-28	6	kek1
KrT95D1	4.85059e-91	0.665906	0.854	0.798	6.75833e-87	6	KrT95D
l(3)neo382	6.09653e-09	0.31036	0.477	0.485	8.4943e-05	6	l(3)neo38
Lar3	5.53224e-57	0.350199	0.93	0.908	7.70808e-53	6	Lar
lbk3	6.3514e-230	1.1295	0.87	0.519	8.84941e-226	6	lbk
Liprin-gamma	1.34369e-29	0.340867	0.757	0.729	1.87216e-25	6	Liprin-gamma
LpR11	1.75235e-36	0.529158	0.475	0.335	2.44154e-32	6	LpR1
mam2	6.00051e-83	0.510535	0.893	0.839	8.36051e-79	6	mam
mamo4	3.60162e-187	0.872511	0.933	0.51	5.01814e-183	6	mamo
msn1	7.29222e-09	0.323961	0.48	0.519	0.000101603	6	msn
nAChRalpha11	7.89304e-15	0.25508	0.816	0.822	1.09974e-10	6	nAChRalpha1
nAChRalpha21	1.05884e-06	0.278738	0.476	0.523	0.0147529	6	nAChRalpha2
nAChRalpha52	2.82467e-174	0.517235	0.997	0.973	3.93561e-170	6	nAChRalpha5
Nca	1.00515e-10	0.290282	0.566	0.611	1.40048e-06	6	Nca
NetB1	2.77564e-137	1.12542	0.692	0.407	3.8673e-133	6	NetB
Nlg33	6.75422e-67	0.396267	0.957	0.887	9.41065e-63	6	Nlg3
Nrk	0.00108666	0.287599	0.279	0.28	1	6	Nrk
nrm2	2.19537e-78	0.586675	0.8	0.703	3.05882e-74	6	nrm
nrv21	4.39544e-58	0.48891	0.794	0.702	6.12417e-54	6	nrv2
Oct-TyrR2	2.25721e-189	1.02799	0.815	0.447	3.14497e-185	6	Oct-TyrR
pan1	8.41444e-46	0.324975	0.905	0.9	1.17238e-41	6	pan
Pde62	1.14243e-88	0.593198	0.889	0.758	1.59175e-84	6	Pde6
pHCl-11	1.46333e-16	0.275457	0.578	0.514	2.03886e-12	6	pHCl-1
PKD1	1.85475e-19	0.474229	0.294	0.202	2.58422e-15	6	PKD
Plc21C1	1.64461e-25	0.37049	0.68	0.683	2.29143e-21	6	Plc21C
plum2	3.99169e-61	0.658567	0.599	0.438	5.56162e-57	6	plum
prage2	7.01151e-75	0.694465	0.367	0.154	9.76914e-71	6	prage
Ptp10D2	6.86095e-75	0.591054	0.748	0.637	9.55936e-71	6	Ptp10D
put1	1.17535e-17	0.462486	0.416	0.36	1.63762e-13	6	put
rdgA2	7.2825e-149	0.84043	0.921	0.654	1.01467e-144	6	rdgA
Ret	0	0.827972	0.294	0.026	0	6	Ret
ringer2	2.59021e-45	0.309204	0.933	0.917	3.60894e-41	6	ringer
robo31	3.35067e-35	0.515255	0.436	0.296	4.66848e-31	6	robo3
roX12	2.40731e-17	0.514841	0.406	0.306	3.3541e-13	6	roX1
roX21	6.06758e-27	0.933486	0.393	0.275	8.45396e-23	6	roX2
RpL27	1.87882e-54	0.271164	0.983	0.961	2.61776e-50	6	RpL27
RpL35	1.42986e-33	0.340217	0.894	0.882	1.99223e-29	6	RpL35
sbb2	4.06061e-48	0.319486	0.944	0.937	5.65765e-44	6	sbb
sca2	0.000116202	0.272556	0.35	0.343	1	6	sca
scro2	2.71615e-110	0.698913	0.571	0.24	3.78442e-106	6	scro
Sema2b1	4.02551e-138	0.924588	0.808	0.569	5.60875e-134	6	Sema2b
sfl1	9.27167e-30	0.552629	0.475	0.38	1.29182e-25	6	sfl
shakB1	4.94854e-126	0.395078	1	0.978	6.8948e-122	6	shakB
Shaw1	8.5324e-23	0.440111	0.587	0.598	1.18882e-18	6	Shaw
SKIP1	1.67993e-65	0.641925	0.684	0.542	2.34065e-61	6	SKIP
sm1	5.71254e-91	0.431272	0.991	0.956	7.95928e-87	6	sm
smal3	3.80835e-162	0.928655	0.832	0.567	5.30617e-158	6	smal
sosie1	7.78934e-260	0.753806	0.279	0.032	1.08529e-255	6	sosie
Sox102F1	3.03067e-66	0.488725	0.385	0.157	4.22263e-62	6	Sox102F
SP23532	9.68314e-17	0.324132	0.639	0.668	1.34915e-12	6	SP2353
spg	7.59744e-12	0.442021	0.272	0.212	1.05855e-07	6	spg
Spn1	9.08597e-80	0.38228	0.989	0.961	1.26595e-75	6	Spn
sqd1	1.68834e-26	0.280177	0.889	0.897	2.35237e-22	6	sqd
sta	7.53581e-88	0.291166	0.993	0.981	1.04996e-83	6	sta
stai1	0	1.24695	0.999	0.954	0	6	stai
stan1	1.482e-57	0.642393	0.444	0.252	2.06487e-53	6	stan
Su(var)2051	1.19322e-30	0.331875	0.796	0.793	1.66251e-26	6	Su(var)205
Swip-11	1.58521e-06	0.264555	0.548	0.628	0.0220867	6	Swip-1
tai3	3.93182e-58	0.561294	0.732	0.655	5.47821e-54	6	tai
Tapdelta	1.12224e-23	0.397052	0.635	0.637	1.56362e-19	6	Tapdelta
Task6	5.89334e-25	0.311899	0.724	0.726	8.21119e-21	6	Task6
Ten-m3	2.24872e-33	0.409105	0.676	0.612	3.13315e-29	6	Ten-m
Tl	1.54518e-07	0.344675	0.328	0.295	0.0021529	6	Tl
tna2	9.62766e-83	0.477591	0.958	0.902	1.34142e-78	6	tna
Toll-63	1.03196e-17	0.266223	0.706	0.69	1.43782e-13	6	Toll-6
toy4	1.97493e-87	0.521877	0.839	0.509	2.75167e-83	6	toy
trn3	3.58176e-80	0.621884	0.713	0.476	4.99046e-76	6	trn
trv3	0	1.06415	1	0.878	0	6	trv
Tsp39D	9.17885e-73	0.492007	0.847	0.808	1.27889e-68	6	Tsp39D
wake2	1.16194e-21	0.486032	0.28	0.178	1.61893e-17	6	wake
X11Lbeta2	2.25289e-22	0.38554	0.634	0.619	3.13895e-18	6	X11Lbeta
ytr1	0.000191664	0.278301	0.28	0.269	1	6	ytr
alc2	1.72682e-71	0.471593	0.777	0.505	2.40598e-67	7	alc
alphaTub84B	4.56764e-58	0.343469	0.993	0.978	6.36409e-54	7	alphaTub84B
Apoltp	3.55666e-46	0.355239	0.326	0.136	4.9555e-42	7	Apoltp
arr	3.09881e-37	0.2741	0.356	0.172	4.31757e-33	7	arr
Atox14	4.60679e-78	0.339326	0.973	0.929	6.41863e-74	7	Atox1
bab1	4.55606e-261	0.613802	0.506	0.096	6.34796e-257	7	bab1
bab2	7.05294e-180	0.610743	0.647	0.203	9.82686e-176	7	bab2
beat-IIa	5.21874e-57	0.36989	0.782	0.497	7.27127e-53	7	beat-IIa
beat-IIIb3	2.12989e-119	0.608598	0.883	0.504	2.96757e-115	7	beat-IIIb
bol	3.918e-41	0.324185	0.942	0.815	5.45895e-37	7	bol
Cam	2.73197e-174	0.363063	1	0.997	3.80645e-170	7	Cam
CanB22	1.87942e-69	0.335326	0.973	0.888	2.61859e-65	7	CanB2
CAP	1.30983e-36	0.256692	0.255	0.106	1.82498e-32	7	CAP
Cbp53E2	9.67881e-165	0.633019	0.912	0.462	1.34855e-160	7	Cbp53E
CCT4	3.60837e-41	0.336478	0.687	0.47	5.02754e-37	7	CCT4
CG100111	1.18546e-90	0.565456	0.774	0.468	1.6517e-86	7	CG10011
CG10077	2.84287e-32	0.266992	0.941	0.859	3.96097e-28	7	CG10077
CG10283	1.05225e-151	0.532629	0.509	0.152	1.4661e-147	7	CG10283
CG111911	4.34083e-289	1.0922	0.878	0.353	6.04807e-285	7	CG11191
CG112212	6.85315e-57	0.439854	0.385	0.167	9.5485e-53	7	CG11221
CG120651	0	0.76237	0.53	0.089	0	7	CG12065
CG124841	1.08805e-103	0.529415	0.703	0.327	1.51598e-99	7	CG12484
CG12567	1.64071e-21	0.316133	0.317	0.187	2.286e-17	7	CG12567
CG13551	6.99813e-51	0.299147	0.951	0.863	9.7505e-47	7	CG13551
CG13887	2.38919e-24	0.250421	0.817	0.683	3.32886e-20	7	CG13887
CG139203	1.0041e-162	0.510775	0.988	0.942	1.39902e-158	7	CG13920
CG14274	1.85711e-112	0.326918	0.262	0.056	2.58752e-108	7	CG14274
CG144592	1.73247e-249	0.853069	0.797	0.233	2.41384e-245	7	CG14459
CG15082	0	1.39024	0.504	0.014	0	7	CG15082
CG150971	1.37032e-50	0.415487	0.546	0.312	1.90927e-46	7	CG15097
CG157654	3.26949e-76	0.390728	0.948	0.63	4.55537e-72	7	CG15765
CG16881	1.00632e-81	0.454949	0.631	0.298	1.40211e-77	7	CG1688
CG172702	3.91428e-80	0.440075	0.938	0.778	5.45377e-76	7	CG17270
CG177162	3.43841e-70	0.366297	0.916	0.594	4.79074e-66	7	CG17716
CG177782	1.5137e-79	0.529924	0.798	0.52	2.10904e-75	7	CG17778
CG178391	1.3579e-146	0.747372	0.733	0.319	1.89196e-142	7	CG17839
CG22011	5.79019e-71	0.535666	0.594	0.31	8.06747e-67	7	CG2201
CG301164	4.41524e-37	0.258243	0.797	0.549	6.15175e-33	7	CG30116
CG304633	2.01045e-110	0.549446	0.901	0.577	2.80116e-106	7	CG30463
CG31475	1.25214e-54	0.319195	0.512	0.248	1.7446e-50	7	CG31475
CG316762	0	1.35011	0.935	0.224	0	7	CG31676
CG326981	2.2901e-149	0.587187	0.736	0.284	3.1908e-145	7	CG32698
CG341132	6.09814e-75	0.3605	0.961	0.769	8.49654e-71	7	CG34113
CG343544	5.82343e-117	0.559587	0.954	0.671	8.11378e-113	7	CG34354
CG343701	2.08575e-57	0.341094	0.55	0.281	2.90607e-53	7	CG34370
CG423134	2.20531e-80	0.426839	0.967	0.736	3.07266e-76	7	CG42313
CG423403	8.31093e-162	0.724451	0.942	0.7	1.15796e-157	7	CG42340
CG42524	2.94648e-21	0.284934	0.422	0.27	4.10533e-17	7	CG42524
CG426631	3.60663e-82	0.46431	0.572	0.263	5.02512e-78	7	CG42663
CG427502	2.13418e-67	0.379451	0.927	0.675	2.97356e-63	7	CG42750
CG42795	4.61906e-27	0.27693	0.529	0.351	6.43574e-23	7	CG42795
CG436891	0	1.65873	0.984	0.134	0	7	CG43689
CG4404	1.34445e-41	0.272218	0.339	0.155	1.87322e-37	7	CG4404
CG444221	2.41419e-61	0.385607	0.837	0.535	3.36369e-57	7	CG44422
CG44671	7.38007e-81	0.468769	0.872	0.613	1.02826e-76	7	CG4467
CG448371	2.02394e-77	0.492833	0.71	0.396	2.81995e-73	7	CG44837
CG46339	2.05107e-27	0.351108	0.365	0.217	2.85775e-23	7	CG46339
CG6006	1.0449e-204	0.541028	0.442	0.096	1.45586e-200	7	CG6006
CG89103	4.22811e-53	0.367783	0.565	0.308	5.89102e-49	7	CG8910
Cow2	1.95305e-75	0.401904	0.941	0.695	2.72119e-71	7	Cow
cpo2	3.70654e-268	0.825401	1	0.933	5.16432e-264	7	cpo
CR44628	2.70021e-153	0.375559	0.284	0.051	3.7622e-149	7	CR44628
CR453322	5.82643e-53	0.315483	0.61	0.331	8.11797e-49	7	CR45332
CR453471	5.8669e-33	0.295801	0.282	0.131	8.17435e-29	7	CR45347
CR456601	5.39953e-90	0.413162	0.33	0.097	7.52317e-86	7	CR45660
crb1	1.73175e-95	0.477237	0.39	0.126	2.41285e-91	7	crb
D	0	0.574357	0.513	0.075	0	7	D
Dat1	9.35746e-142	0.584784	0.846	0.378	1.30377e-137	7	Dat
Dg1	1.00498e-32	0.309745	0.709	0.516	1.40024e-28	7	Dg
DIP-theta1	0	1.21561	0.97	0.312	0	7	DIP-theta
disco1	0	1.23583	0.805	0.09	0	7	disco
disco-r1	0	1.1315	0.785	0.073	0	7	disco-r
Dlc90F	3.86074e-27	0.265143	0.719	0.558	5.37917e-23	7	Dlc90F
dlp2	2.63398e-91	0.490663	0.484	0.186	3.66992e-87	7	dlp
dmrt99B1	0	0.474821	0.341	0.031	0	7	dmrt99B
dpr142	6.98549e-34	0.301353	0.867	0.717	9.73288e-30	7	dpr14
dpr152	8.16684e-54	0.36172	0.549	0.286	1.13789e-49	7	dpr15
dpr22	6.24854e-38	0.257115	0.568	0.328	8.70609e-34	7	dpr2
dpr32	2.21594e-118	0.579841	0.686	0.302	3.08747e-114	7	dpr3
dpr52	7.0848e-45	0.260799	0.673	0.397	9.87125e-41	7	dpr5
dpr62	4.57792e-72	0.458718	0.846	0.561	6.37841e-68	7	dpr6
Dscam23	3.71208e-58	0.321443	0.993	0.96	5.17204e-54	7	Dscam2
Dtg1	0	0.98431	0.558	0.072	0	7	Dtg
Eip78C1	3.56254e-102	0.519466	0.947	0.767	4.96369e-98	7	Eip78C
Eip93F2	1.10137e-289	1.10392	0.986	0.494	1.53455e-285	7	Eip93F
eys3	1.08368e-99	0.462361	0.965	0.626	1.50989e-95	7	eys
Fas31	1.02689e-98	0.425078	0.901	0.495	1.43076e-94	7	Fas3
FMRFaR	1.11431e-61	0.426378	0.445	0.196	1.55257e-57	7	FMRFaR
Frq22	9.40122e-33	0.347466	0.859	0.692	1.30987e-28	7	Frq2
futsch1	5.04929e-96	0.381671	0.993	0.951	7.03518e-92	7	futsch
fz22	1.27571e-212	0.87378	0.986	0.77	1.77745e-208	7	fz2
GFP3	2.60084e-86	0.510659	0.954	0.836	3.62375e-82	7	GFP
glec1	1.65845e-36	0.31387	0.731	0.515	2.31071e-32	7	glec
hid	3.7009e-85	0.319785	0.284	0.076	5.15647e-81	7	hid
Hk	8.06932e-58	0.366713	0.942	0.797	1.1243e-53	7	Hk
Hr41	5.46975e-94	0.418988	0.986	0.904	7.621e-90	7	Hr4
Hsp272	3.16648e-41	0.401076	0.797	0.61	4.41186e-37	7	Hsp27
jp	5.39522e-87	0.551223	0.597	0.295	7.51716e-83	7	jp
kek32	1.1733e-138	0.630017	0.795	0.372	1.63476e-134	7	kek3
kek51	1.42203e-47	0.326309	0.566	0.321	1.98131e-43	7	kek5
kek61	1.83067e-37	0.320048	0.622	0.4	2.55067e-33	7	kek6
klar2	9.34112e-138	0.646961	0.948	0.772	1.3015e-133	7	klar
ko1	6.29395e-68	0.286799	0.277	0.085	8.76936e-64	7	ko
Lac	8.44065e-61	0.277833	0.408	0.158	1.17604e-56	7	Lac
Lk6	1.52842e-37	0.298114	0.914	0.798	2.12955e-33	7	Lk6
Mbs1	4.31562e-24	0.270884	0.635	0.481	6.01296e-20	7	Mbs
Meltrin	1.80935e-20	0.273465	0.378	0.239	2.52098e-16	7	Meltrin
MRE162	1.50995e-105	0.409036	0.981	0.978	2.10381e-101	7	MRE16
mub1	3.8773e-72	0.263636	0.977	0.923	5.40224e-68	7	mub
Myo10A	1.43716e-274	0.467334	0.295	0.032	2.0024e-270	7	Myo10A
nAChRalpha71	3.92984e-74	0.32621	0.964	0.77	5.47545e-70	7	nAChRalpha7
ND-15	2.95247e-35	0.271369	0.878	0.712	4.11367e-31	7	ND-15
Nop17l	3.89958e-33	0.265156	0.356	0.187	5.43328e-29	7	Nop17l
Nrx-IV1	3.06354e-26	0.267973	0.424	0.258	4.26843e-22	7	Nrx-IV
orb	3.01986e-31	0.280325	0.313	0.16	4.20757e-27	7	orb
PIG-F1	2.44406e-28	0.274708	0.633	0.446	3.4053e-24	7	PIG-F
Pxn3	6.07096e-198	0.946976	0.947	0.542	8.45867e-194	7	Pxn
pyd	1.02052e-127	0.716991	0.808	0.442	1.42189e-123	7	pyd
qtc1	3.92346e-32	0.274432	0.759	0.579	5.46656e-28	7	qtc
RASSF81	1.4839e-31	0.273401	0.801	0.643	2.06751e-27	7	RASSF8
rdgA3	3.45741e-165	0.767881	0.983	0.653	4.81721e-161	7	rdgA
Rgk32	7.51091e-94	0.472196	0.716	0.354	1.0465e-89	7	Rgk3
rgn3	9.89806e-271	1.10334	0.916	0.401	1.3791e-266	7	rgn
rho	1.70445e-58	0.358028	0.484	0.229	2.37481e-54	7	rho
Rim2	4.01049e-78	0.390481	0.981	0.899	5.58782e-74	7	Rim
ringer3	7.1419e-98	0.426023	0.961	0.916	9.9508e-94	7	ringer
RpS3A	4.70877e-67	0.254302	0.978	0.968	6.56073e-63	7	RpS3A
scro3	3.60458e-84	0.272138	0.631	0.239	5.02227e-80	7	scro
scrt2	6.84209e-72	0.373062	0.98	0.903	9.53309e-68	7	scrt
Sema1a2	2.46919e-100	0.465753	0.991	0.947	3.44033e-96	7	Sema1a
Sf3b6	8.11566e-79	0.465465	0.886	0.645	1.13076e-74	7	Sf3b6
Sh3beta	1.31096e-24	0.264141	0.677	0.523	1.82656e-20	7	Sh3beta
shakB2	6.04577e-185	0.530937	1	0.978	8.42357e-181	7	shakB
side1	1.30301e-69	0.392957	0.957	0.72	1.81549e-65	7	side
Sox21b	0	0.645342	0.572	0.077	0	7	Sox21b
SoxN1	1.20989e-304	0.845533	0.893	0.239	1.68574e-300	7	SoxN
St31	7.27841e-52	0.364249	0.683	0.414	1.0141e-47	7	St3
Syn1	1.36847e-48	0.314334	0.919	0.791	1.90669e-44	7	Syn1
Syp1	2.62985e-189	0.647491	0.996	0.909	3.66418e-185	7	Syp
Syt12	4.35304e-33	0.296715	0.517	0.321	6.06508e-29	7	Syt12
Ten-m4	1.22423e-50	0.352463	0.859	0.607	1.70572e-46	7	Ten-m
tinc1	7.45713e-32	0.294817	0.628	0.422	1.039e-27	7	tinc
tok1	4.17484e-56	0.331517	0.584	0.293	5.81681e-52	7	tok
Toll-64	1.77981e-45	0.376999	0.89	0.685	2.4798e-41	7	Toll-6
tou	1.20023e-30	0.27973	0.745	0.555	1.67229e-26	7	tou
Tpr2	1.07304e-50	0.411033	0.63	0.395	1.49507e-46	7	Tpr2
Trim92	8.4527e-215	0.875168	0.931	0.473	1.17771e-210	7	Trim9
trv4	1.40128e-185	0.64145	0.996	0.878	1.95241e-181	7	trv
Trx-2	8.4474e-60	0.31593	0.958	0.875	1.17698e-55	7	Trx-2
Tsp39D1	5.46114e-41	0.305884	0.918	0.806	7.60901e-37	7	Tsp39D
Tsp42El1	5.16411e-189	0.430609	0.329	0.055	7.19516e-185	7	Tsp42El
Tsp66E1	5.61859e-146	0.584591	0.991	0.85	7.82838e-142	7	Tsp66E
tud	1.27117e-39	0.346274	0.621	0.407	1.77112e-35	7	tud
w3	2.53804e-277	1.34561	0.924	0.462	3.53626e-273	7	w
Act42A	6.07828e-36	0.260153	0.98	0.857	8.46887e-32	8	Act42A
Act5C1	1.45671e-63	0.346952	0.991	0.911	2.02964e-59	8	Act5C
Antp	0	1.76967	0.697	0.048	0	8	Antp
ATPsynCF61	1.39518e-47	0.25341	0.98	0.909	1.9439e-43	8	ATPsynCF6
ATPsynF1	1.22231e-57	0.292749	0.993	0.935	1.70304e-53	8	ATPsynF
betaTub56D2	9.80645e-57	0.347305	0.996	0.917	1.36633e-52	8	betaTub56D
Blimp-12	2.25219e-85	0.339394	0.699	0.322	3.13798e-81	8	Blimp-1
bnl	7.01656e-59	0.538933	0.254	0.081	9.77617e-55	8	bnl
br1	9.76661e-18	0.461975	0.316	0.191	1.36078e-13	8	br
Bx3	4.99669e-60	0.43857	0.718	0.415	6.9619e-56	8	Bx
CanB23	2.00953e-89	0.440978	0.988	0.888	2.79988e-85	8	CanB2
Cbp53E3	1.02462e-60	0.843919	0.784	0.465	1.42761e-56	8	Cbp53E
CG112671	1.51517e-39	0.288495	0.927	0.696	2.11109e-35	8	CG11267
CG113191	4.16871e-42	0.314911	0.673	0.39	5.80826e-38	8	CG11319
CG131081	8.82015e-48	0.295714	0.902	0.597	1.22891e-43	8	CG13108
CG14015	1.66391e-30	0.263022	0.707	0.446	2.31833e-26	8	CG14015
CG17193	5.41573e-59	0.317754	0.254	0.081	7.54573e-55	8	CG17193
CG177163	1.33698e-70	0.583716	0.872	0.595	1.86282e-66	8	CG17716
CG318142	8.00349e-26	0.29622	0.545	0.342	1.11513e-21	8	CG31814
CG319971	1.86769e-51	0.432514	0.329	0.127	2.60225e-47	8	CG31997
CG3961	5.06919e-48	0.253662	0.638	0.337	7.0629e-44	8	CG3961
CG423421	2.3846e-52	0.43158	0.833	0.529	3.32247e-48	8	CG42342
CG42394	8.09911e-48	0.289347	0.661	0.359	1.12845e-43	8	CG42394
CG437781	4.85349e-31	0.2564	0.571	0.334	6.76237e-27	8	CG43778
CG46301	8.67581e-47	0.398718	0.784	0.512	1.2088e-42	8	CG46301
CG7630	9.82811e-47	0.251682	0.988	0.919	1.36935e-42	8	CG7630
CG99192	1.00777e-57	0.309779	0.977	0.793	1.40413e-53	8	CG9919
COX7C1	1.01579e-48	0.265386	0.99	0.91	1.4153e-44	8	COX7C
cpx1	2.78738e-37	0.250825	0.997	0.954	3.88365e-33	8	cpx
CR44024	4.60798e-101	0.37432	0.597	0.234	6.4203e-97	8	CR44024
CR44978	4.82607e-18	0.30175	0.412	0.261	6.72416e-14	8	CR44978
cype1	3.35538e-63	0.284934	1	0.945	4.67505e-59	8	cype
Cyt-c-p2	2.34398e-32	0.260042	0.96	0.782	3.26586e-28	8	Cyt-c-p
dati1	2.92543e-147	0.599768	0.839	0.347	4.07601e-143	8	dati
DIP-beta3	2.39205e-25	0.278956	0.424	0.24	3.33284e-21	8	DIP-beta
DIP-delta1	7.74206e-60	0.405021	0.614	0.319	1.0787e-55	8	DIP-delta
Dop2R2	4.70546e-26	0.25374	0.781	0.541	6.55612e-22	8	Dop2R
fabp1	1.23352e-114	0.56112	0.986	0.813	1.71866e-110	8	fabp
Fie	8.65714e-59	0.272375	0.682	0.352	1.2062e-54	8	Fie
GILT3	2.24478e-53	0.388694	0.259	0.089	3.12765e-49	8	GILT3
Glut1	1.29733e-35	0.256894	0.882	0.626	1.80757e-31	8	Glut1
grn	0	1.42616	0.537	0.025	0	8	grn
GstZ2	7.69811e-129	0.651133	0.918	0.487	1.07258e-124	8	GstZ2
Hasp2	5.66147e-59	0.340444	0.902	0.57	7.88813e-55	8	Hasp
His4r	3.54062e-120	0.298133	1	0.997	4.93314e-116	8	His4r
Hk1	1.1318e-64	0.356557	0.973	0.796	1.57693e-60	8	Hk
Hsp67Ba1	3.88237e-44	0.300876	0.919	0.642	5.40931e-40	8	Hsp67Ba
hth2	3.44196e-272	1.33675	0.963	0.548	4.79568e-268	8	hth
igl1	3.91734e-70	0.612993	0.951	0.693	5.45803e-66	8	igl
Kank1	7.25892e-55	0.283937	0.697	0.375	1.01139e-50	8	Kank
Lim11	1.41838e-285	0.809795	0.663	0.146	1.97622e-281	8	Lim1
Lmpt	4.85218e-164	0.634193	0.517	0.146	6.76054e-160	8	Lmpt
LpR12	3.99579e-56	0.321159	0.633	0.331	5.56733e-52	8	LpR1
mid	0	0.342938	0.256	0.012	0	8	mid
Msp3001	1.21826e-41	0.277974	0.993	0.856	1.6974e-37	8	Msp300
nAChRalpha32	5.18695e-41	0.316032	0.772	0.48	7.22698e-37	8	nAChRalpha3
nAChRalpha72	3.9231e-35	0.37086	0.932	0.771	5.46605e-31	8	nAChRalpha7
ND-13A	2.41853e-61	0.333104	0.925	0.634	3.36973e-57	8	ND-13A
ND-MLRQ	2.04617e-48	0.277453	0.984	0.875	2.85093e-44	8	ND-MLRQ
nemy1	1.59498e-95	0.437873	0.817	0.421	2.22228e-91	8	nemy
noe1	1.79332e-52	0.303979	1	1	2.49864e-48	8	noe
path	3.3451e-34	0.290764	0.634	0.366	4.66073e-30	8	path
prim1	6.4282e-28	0.330267	0.883	0.61	8.95641e-24	8	prim
pros	5.565e-52	0.736071	0.954	0.772	7.75371e-48	8	pros
Pvf32	1.62071e-20	0.364405	0.805	0.667	2.25813e-16	8	Pvf3
rpr	8.23571e-44	0.265907	0.331	0.14	1.14748e-39	8	rpr
RpS13	4.39396e-43	0.255247	0.973	0.854	6.1221e-39	8	RpS13
Scp2	5.09753e-38	0.502172	0.272	0.113	7.1024e-34	8	Scp2
SdhC	7.2017e-35	0.256665	0.87	0.612	1.00341e-30	8	SdhC
Sep1	5.49039e-51	0.255901	0.728	0.4	7.64976e-47	8	Sep1
sesB1	3.21281e-55	0.294255	0.991	0.918	4.47641e-51	8	sesB
Shab	1.2956e-65	0.373983	0.898	0.569	1.80517e-61	8	Shab
skl	3.97335e-41	0.261626	0.344	0.15	5.53606e-37	8	skl
tio	3.62928e-140	0.286237	0.333	0.071	5.05668e-136	8	tio
TM4SF2	1.10194e-64	0.362916	0.919	0.568	1.53534e-60	8	TM4SF
Toll-65	4.8974e-35	0.298029	0.896	0.685	6.82354e-31	8	Toll-6
Tpi2	9.39395e-64	0.299971	0.813	0.44	1.30886e-59	8	Tpi
tsh	0	1.04564	0.749	0.085	0	8	tsh
tsr	9.50547e-43	0.316761	0.98	0.827	1.3244e-38	8	tsr
twz	4.0442e-48	0.843744	0.53	0.287	5.63479e-44	8	twz
unc-4	0	0.43504	0.356	0.015	0	8	unc-4
UQCR-Q1	4.38387e-47	0.299405	0.965	0.846	6.10805e-43	8	UQCR-Q
alc3	2.39065e-73	0.556365	0.746	0.507	3.3309e-69	9	alc
AstA-R12	2.71919e-102	0.586211	0.458	0.159	3.78864e-98	9	AstA-R1
Atox15	8.1822e-115	0.452425	0.991	0.929	1.14003e-110	9	Atox1
beat-IIa1	7.9662e-237	1.11734	0.932	0.494	1.10993e-232	9	beat-IIa
beat-IIb	7.60803e-141	0.838953	0.694	0.308	1.06003e-136	9	beat-IIb
br2	1.47534e-229	0.75272	0.7	0.181	2.05559e-225	9	br
bru12	8.25304e-32	0.312197	0.49	0.296	1.1499e-27	9	bru1
bves1	1.27935e-20	0.354767	0.491	0.383	1.78252e-16	9	bves
cac	3.12184e-69	0.321992	0.989	0.957	4.34967e-65	9	cac
CanB24	2.83575e-59	0.338004	0.976	0.888	3.95105e-55	9	CanB2
CAP1	4.92553e-49	0.356496	0.279	0.106	6.86274e-45	9	CAP
cdi2	5.44324e-37	0.341935	0.832	0.731	7.58406e-33	9	cdi
CG100112	7.17244e-166	0.951232	0.834	0.467	9.99336e-162	9	CG10011
CG111912	2.24929e-142	0.845701	0.736	0.358	3.13393e-138	9	CG11191
CG112213	8.08665e-34	0.467757	0.331	0.169	1.12671e-29	9	CG11221
CG12643	2.10837e-19	0.343858	0.341	0.216	2.93759e-15	9	CG12643
CG130552	2.74413e-56	0.502592	0.765	0.577	3.82339e-52	9	CG13055
CG138931	1.08794e-13	0.266615	0.29	0.195	1.51582e-09	9	CG13893
CG139204	7.65868e-132	0.480148	0.997	0.942	1.06708e-127	9	CG13920
CG140822	2.4006e-99	0.67296	0.501	0.195	3.34476e-95	9	CG14082
CG142071	1.82261e-16	0.267983	0.414	0.306	2.53943e-12	9	CG14207
CG144593	0	1.12387	0.862	0.233	0	9	CG14459
CG145092	1.1079e-81	0.334481	0.989	0.888	1.54363e-77	9	CG14509
CG157655	2.91749e-182	0.863412	0.975	0.631	4.06494e-178	9	CG15765
CG167791	2.84533e-51	0.37154	0.936	0.819	3.96439e-47	9	CG16779
CG16882	3.23418e-11	0.290645	0.405	0.305	4.50619e-07	9	CG1688
CG172703	3.38434e-53	0.360547	0.917	0.779	4.7154e-49	9	CG17270
CG177164	5.8447e-46	0.270466	0.879	0.596	8.14342e-42	9	CG17716
CG177783	2.87884e-135	0.876122	0.845	0.52	4.01109e-131	9	CG17778
CG17816	7.33809e-50	0.332769	0.953	0.852	1.02242e-45	9	CG17816
CG301165	2.92674e-69	0.464124	0.824	0.549	4.07783e-65	9	CG30116
CG304634	1.35944e-54	0.379989	0.84	0.579	1.8941e-50	9	CG30463
CG31042	7.44268e-25	0.350872	0.43	0.292	1.03699e-20	9	CG3104
CG316763	7.19805e-232	0.866642	0.779	0.23	1.00291e-227	9	CG31676
CG316902	1.46096e-60	0.451168	0.615	0.353	2.03556e-56	9	CG31690
CG320521	1.54689e-34	0.335411	0.433	0.238	2.15528e-30	9	CG32052
CG32354	1.20479e-179	0.615788	0.311	0.05	1.67863e-175	9	CG32354
CG326831	4.86158e-50	0.374604	0.614	0.36	6.77364e-46	9	CG32683
CG326982	2.2937e-137	0.651909	0.714	0.286	3.19581e-133	9	CG32698
CG331811	3.89482e-16	0.260146	0.477	0.359	5.42665e-12	9	CG33181
CG343771	0	1.03434	0.633	0.093	0	9	CG34377
CG343832	7.19231e-232	1.00767	0.973	0.729	1.0021e-227	9	CG34383
CG422601	9.78741e-56	0.367533	0.925	0.775	1.36368e-51	9	CG42260
CG425241	1.78952e-22	0.341985	0.403	0.271	2.49334e-18	9	CG42524
CG425414	7.31707e-176	0.797028	0.989	0.809	1.01949e-171	9	CG42541
CG426632	4.81399e-138	0.834862	0.63	0.262	6.70733e-134	9	CG42663
CG427503	2.06159e-198	0.943415	0.976	0.674	2.87242e-194	9	CG42750
CG436582	6.63324e-303	1.54149	0.98	0.565	9.24209e-299	9	CG43658
CG436892	0	1.87303	0.991	0.136	0	9	CG43689
CG444222	6.86687e-122	0.714203	0.876	0.535	9.56761e-118	9	CG44422
CG44672	3.8035e-121	0.696884	0.863	0.614	5.29941e-117	9	CG4467
CG448372	3.63629e-131	0.71412	0.768	0.395	5.06645e-127	9	CG44837
CG48293	9.43238e-45	0.299399	0.479	0.237	1.31421e-40	9	CG4829
CG50651	2.11596e-22	0.305892	0.708	0.603	2.94817e-18	9	CG5065
CG6044	5.6937e-20	0.310578	0.504	0.391	7.93303e-16	9	CG6044
CG85001	2.04598e-16	0.2755	0.581	0.488	2.85067e-12	9	CG8500
CG88611	0	1.48763	0.997	0.432	0	9	CG8861
cindr	1.78296e-59	0.495491	0.802	0.645	2.48419e-55	9	cindr
Cow3	7.8876e-193	0.847165	0.978	0.695	1.09898e-188	9	Cow
cpo3	9.54216e-170	0.615071	0.998	0.933	1.32951e-165	9	cpo
CR44366	0	0.894484	0.469	0.024	0	9	CR44366
CR449781	2.33786e-234	1.14147	0.747	0.253	3.25734e-230	9	CR44978
CR453472	1.50714e-55	0.452467	0.328	0.13	2.09989e-51	9	CR45347
CR457583	3.49427e-50	0.32396	0.884	0.698	4.86857e-46	9	CR45758
CR460031	1.12072e-36	0.32318	0.273	0.113	1.5615e-32	9	CR46003
CR460062	1.08953e-61	0.486042	0.454	0.197	1.51804e-57	9	CR46006
crb2	7.6441e-297	0.955233	0.59	0.122	1.06505e-292	9	crb
Dat2	1.62687e-83	0.5578	0.727	0.382	2.26672e-79	9	Dat
DIP-theta2	0	1.478	0.976	0.313	0	9	DIP-theta
disco2	0	1.42043	0.785	0.092	0	9	disco
disco-r2	0	1.27994	0.766	0.075	0	9	disco-r
Dlic1	2.86961e-20	0.29795	0.603	0.512	3.99822e-16	9	Dlic
dmrt99B2	3.09049e-259	0.545117	0.298	0.033	4.30597e-255	9	dmrt99B
dpr23	1.80438e-143	0.796041	0.714	0.324	2.51404e-139	9	dpr2
dpr33	7.04448e-112	0.645948	0.664	0.303	9.81508e-108	9	dpr3
Dscam24	9.08342e-171	0.620369	1	0.96	1.26559e-166	9	Dscam2
Dtg2	0	1.10075	0.6	0.072	0	9	Dtg
Dys2	3.07222e-47	0.447204	0.684	0.484	4.28052e-43	9	Dys
eag2	1.71489e-28	0.344335	0.637	0.483	2.38935e-24	9	eag
eIF4EHP2	7.2129e-61	0.415224	0.907	0.779	1.00497e-56	9	eIF4EHP
Eip78C2	2.97726e-31	0.280787	0.867	0.77	4.14821e-27	9	Eip78C
Eip93F3	2.02539e-214	0.89811	0.986	0.495	2.82198e-210	9	Eip93F
Fas32	2.10395e-223	0.926531	0.978	0.494	2.93143e-219	9	Fas3
Fife2	5.88094e-85	0.53036	0.848	0.53	8.19392e-81	9	Fife
FMRFaR1	1.7216e-34	0.40446	0.374	0.199	2.3987e-30	9	FMRFaR
Frq23	3.94039e-64	0.43369	0.893	0.692	5.49015e-60	9	Frq2
GluClalpha4	4.42067e-97	0.504212	0.991	0.9	6.15932e-93	9	GluClalpha
ham3	4.52089e-73	0.281915	0.512	0.19	6.29895e-69	9	ham
Hr383	6.26506e-08	0.444408	0.567	0.519	0.00087291	9	Hr38
Hr42	1.06069e-96	0.512749	0.991	0.904	1.47787e-92	9	Hr4
Hs3st-A3	5.38358e-43	0.353339	0.898	0.741	7.50094e-39	9	Hs3st-A
Hsp67Bc2	7.00576e-60	0.297268	1	0.993	9.76113e-56	9	Hsp67Bc
Ih1	5.2245e-161	0.799106	0.969	0.796	7.2793e-157	9	Ih
IRSp531	0	1.12214	0.666	0.054	0	9	IRSp53
jp1	4.13177e-58	0.548675	0.524	0.298	5.75679e-54	9	jp
kek52	1.34357e-30	0.373298	0.488	0.323	1.872e-26	9	kek5
kek62	1.15653e-52	0.490706	0.614	0.401	1.61139e-48	9	kek6
klar3	1.42705e-49	0.388784	0.889	0.774	1.98831e-45	9	klar
klg2	0	1.77524	1	0.748	0	9	klg
ko2	2.93109e-92	0.437766	0.309	0.085	4.08389e-88	9	ko
kug2	1.56044e-121	0.77	0.769	0.417	2.17416e-117	9	kug
lbk4	4.65349e-130	0.815564	0.851	0.521	6.48371e-126	9	lbk
lbm1	1.81271e-169	0.830017	0.535	0.155	2.52564e-165	9	lbm
Lmpt1	2.91952e-95	0.526239	0.432	0.149	4.06777e-91	9	Lmpt
mbl1	9.99331e-81	0.292277	0.981	0.647	1.39237e-76	9	mbl
Mbs2	4.29494e-16	0.253484	0.576	0.483	5.98413e-12	9	Mbs
Mkp32	9.1114e-69	0.947387	0.722	0.522	1.26949e-64	9	Mkp3
msn2	1.06255e-41	0.400102	0.681	0.514	1.48045e-37	9	msn
nAChRalpha33	1.51389e-193	0.898428	0.901	0.477	2.1093e-189	9	nAChRalpha3
nAChRalpha53	5.39911e-101	0.385884	1	0.973	7.52258e-97	9	nAChRalpha5
nAChRalpha73	1.34551e-69	0.412657	0.973	0.771	1.8747e-65	9	nAChRalpha7
nkd1	8.071e-55	0.393022	0.813	0.555	1.12453e-50	9	nkd
Nlg22	6.37229e-44	0.407387	0.848	0.7	8.87851e-40	9	Nlg2
Nlg41	6.86899e-62	0.472344	0.68	0.426	9.57056e-58	9	Nlg4
Nna11	6.50811e-138	0.524576	0.38	0.089	9.06775e-134	9	Nna1
norpA2	4.01383e-23	0.308233	0.67	0.558	5.59247e-19	9	norpA
numb3	3.16912e-21	0.304376	0.531	0.406	4.41554e-17	9	numb
Octbeta2R1	2.26936e-55	0.390556	0.802	0.563	3.1619e-51	9	Octbeta2R
para2	1.68399e-128	0.459286	0.998	0.974	2.3463e-124	9	para
Pde9	5.19429e-44	0.297952	0.945	0.829	7.23721e-40	9	Pde9
Pka-C11	1.97235e-120	0.357068	0.991	0.89	2.74807e-116	9	Pka-C1
Prosap1	4.35819e-96	0.405789	0.992	0.938	6.07227e-92	9	Prosap
puc3	5.11095e-54	0.665159	0.617	0.406	7.12108e-50	9	puc
Pxn4	8.47761e-83	0.448198	0.87	0.545	1.18119e-78	9	Pxn
pyd1	3.9122e-39	0.405492	0.653	0.447	5.45087e-35	9	pyd
qvr2	7.3447e-62	0.376126	0.964	0.899	1.02334e-57	9	qvr
RASSF82	1.05908e-38	0.396672	0.75	0.644	1.47562e-34	9	RASSF8
rdgA4	9.83961e-204	1.06769	0.975	0.654	1.37095e-199	9	rdgA
Rgk33	1.38262e-60	0.455977	0.63	0.357	1.9264e-56	9	Rgk3
ringer4	4.19724e-44	0.283755	0.972	0.916	5.84801e-40	9	ringer
roX22	2.46692e-08	0.474776	0.341	0.277	0.000343715	9	roX2
RpL23	1.19554e-94	0.308347	0.997	0.981	1.66575e-90	9	RpL23
RpL26	6.43193e-81	0.273629	0.992	0.975	8.96161e-77	9	RpL26
scro4	7.71591e-73	0.381702	0.586	0.241	1.07506e-68	9	scro
scrt3	1.23378e-69	0.410921	0.978	0.903	1.71903e-65	9	scrt
sdk	1.4024e-57	0.400929	0.413	0.18	1.95396e-53	9	sdk
sdt2	1.69473e-26	0.289291	0.89	0.818	2.36126e-22	9	sdt
Sema1a3	2.23171e-176	0.656211	0.997	0.947	3.10944e-172	9	Sema1a
shakB3	2.85141e-206	0.615952	1	0.978	3.97287e-202	9	shakB
side2	1.75515e-249	1.04579	0.994	0.719	2.44546e-245	9	side
sky2	6.87025e-57	0.441662	0.841	0.653	9.57232e-53	9	sky
smal4	3.93227e-73	0.579183	0.808	0.568	5.47883e-69	9	smal
Snoo2	1.27402e-23	0.267483	0.661	0.526	1.77509e-19	9	Snoo
SoxN2	2.33848e-191	0.664012	0.799	0.243	3.25821e-187	9	SoxN
St32	4.34342e-17	0.282866	0.531	0.419	6.05169e-13	9	St3
Syp2	2.65409e-202	0.799593	0.997	0.909	3.69794e-198	9	Syp
Syx1A2	1.06897e-155	0.507541	0.995	0.961	1.4894e-151	9	Syx1A
Tango13	4.20052e-18	0.269595	0.294	0.18	5.85259e-14	9	Tango13
Ten-m5	1.13723e-106	0.612018	0.889	0.607	1.58451e-102	9	Ten-m
tipE1	4.5755e-32	0.401211	0.579	0.426	6.37504e-28	9	tipE
Tk	8.82702e-136	0.329429	0.259	0.044	1.22987e-131	9	Tk		Asahina, K., Watanabe, K., Duistermars, B.J., Hoopfer, E., Gonzalez, C.R., Eyjolfsdottir, E.A., Perona, P., and Anderson, D.J. (2014). Tachykinin-Expressing Neurons Control Male-Specific Aggressive Arousal in Drosophila. Cell 156, 221-235. 10.1016/j.cell.2013.11.045.
tok2	9.19248e-96	0.577393	0.637	0.293	1.28079e-91	9	tok
Toll-66	1.28309e-60	0.388656	0.898	0.685	1.78772e-56	9	Toll-6
Trim93	4.85418e-120	0.68792	0.848	0.476	6.76333e-116	9	Trim9
TrissinR1	1.02724e-153	0.829954	0.575	0.193	1.43125e-149	9	TrissinR
trv5	5.51177e-79	0.374589	0.998	0.878	7.67955e-75	9	trv
Tsp42El2	9.86171e-221	0.589525	0.356	0.055	1.37403e-216	9	Tsp42El
Tsp66E2	5.60681e-85	0.450088	0.984	0.85	7.81196e-81	9	Tsp66E
tutl3	1.01776e-39	0.280515	0.975	0.878	1.41804e-35	9	tutl
twz1	2.5986e-95	0.498168	0.633	0.285	3.62062e-91	9	twz
w4	1.56182e-34	0.347543	0.658	0.47	2.17608e-30	9	w
wry2	1.04565e-181	0.881942	0.962	0.624	1.45691e-177	9	wry
2mit1	1.10666e-15	0.412733	0.43	0.352	1.54192e-11	10	2mit
5-HT1A2	2.35379e-116	0.78666	0.866	0.529	3.27954e-112	10	5-HT1A
Ac13E1	5.19196e-52	0.535909	0.295	0.115	7.23396e-48	10	Ac13E
Ace2	2.53331e-21	0.2652	0.828	0.77	3.52966e-17	10	Ace
Actbeta	2.55799e-10	0.311452	0.457	0.439	3.56406e-06	10	Actbeta
AGO1	1.94894e-36	0.348005	0.89	0.865	2.71546e-32	10	AGO1
Akap2001	2.13261e-11	0.253539	0.639	0.639	2.97136e-07	10	Akap200
ap3	3.37489e-205	0.946404	0.776	0.268	4.70224e-201	10	ap
AstC-R13	1.10144e-09	0.285526	0.304	0.226	1.53464e-05	10	AstC-R1
beat-IIa2	1.14421e-50	0.540246	0.697	0.5	1.59422e-46	10	beat-IIa
beat-IIb1	1.63233e-45	0.607581	0.494	0.313	2.27433e-41	10	beat-IIb
beat-IIIc	5.47623e-276	1.27362	0.919	0.421	7.63003e-272	10	beat-IIIc
brp2	1.89442e-25	0.277918	0.918	0.898	2.6395e-21	10	brp
bru33	7.939e-146	0.659397	0.986	0.798	1.10614e-141	10	bru3
Ccn	6.19911e-288	1.41707	0.878	0.373	8.63722e-284	10	Ccn
cdi3	4.36898e-30	0.356367	0.762	0.733	6.0873e-26	10	cdi
cg1	7.38148e-17	0.283961	0.689	0.697	1.02846e-12	10	cg
CG103841	6.65986e-41	0.479335	0.683	0.511	9.27918e-37	10	CG10384
CG110001	7.79894e-42	0.529671	0.639	0.494	1.08663e-37	10	CG11000
CG11357	0.000159806	0.265919	0.264	0.24	1	10	CG11357
CG113601	2.36727e-21	0.26696	0.847	0.855	3.29831e-17	10	CG11360
CG118732	4.60608e-31	0.404363	0.681	0.62	6.41765e-27	10	CG11873
CG12163	2.56855e-224	1.16113	0.845	0.412	3.57876e-220	10	CG12163
CG12851	0.0046637	0.266449	0.322	0.339	1	10	CG12851
CG13585	9.33869e-21	0.322887	0.68	0.677	1.30116e-16	10	CG13585
CG136852	5.8363e-113	0.832678	0.758	0.504	8.13172e-109	10	CG13685
CG139205	3.4456e-84	0.469936	0.976	0.943	4.80075e-80	10	CG13920
CG140243	2.01844e-36	0.456692	0.643	0.515	2.8123e-32	10	CG14024
CG14995	4.70492e-29	0.574886	0.39	0.258	6.55537e-25	10	CG14995
CG16883	1.10408e-23	0.36465	0.451	0.304	1.53831e-19	10	CG1688
CG17065	4.91077e-08	0.299434	0.53	0.569	0.000684217	10	CG17065
CG1943	1.78927e-31	0.28352	0.907	0.88	2.49298e-27	10	CG1943
CG2082	4.03917e-61	0.558612	0.652	0.424	5.62778e-57	10	CG2082
CG301722	3.66882e-45	0.259737	0.997	0.969	5.11177e-41	10	CG30172
[truncated: 22,941 more rows]

## Sheet: 6.FullDataClusterAnnotations
		Homeotics	Sex Hierarchy	Circadian	Mushroom body		Fast Acting Neurotransmitter																								Immunoglobulin-like domain superfamily											Overlap with other scRNA-seq studies
		segment/parasegment					Acetylcholine	Glutamate	GABA		Monoamines	Histamine	Dopamine	Serotonin	Tyramine and Octopamine			NON-NMDA IONOTROPIC GLUTAMATE RECEPTORS - OTHER	NMDA IONOTROPIC GLUTAMATE RECEPTORS	MUSCARINIC ACETYLCHOLINE RECEPTORS	GABA-GATED CHLORIDE CHANNEL SUBUNITS	TYRAMINE RECEPTORS	OCTOPAMINE RECEPTORS	5-HYDROXYTRYPTAMINE (SEROTONIN) GPCRs	DOPAMINE RECEPTORS	GABA(B) RECEPTORS	NICOTINIC ACETYLCHOLINE RECEPTOR SUBUNITS	Neuropeptides	Peptide Receptor		dpr	DIP	Beat	side	kek	robo	Dscam	turtle, fred, ed	Immunoglobulin-like domain superfamily	Apoptosis	Inhibitors of Apoptosis	Overlap with Davies (adult aging brain)	Overlap with Allen (adult VNC)	Overlap with Avalos	Overlap with Croset (Midbrain)
cluster	Cluster Annotations																																									Jaccarad Index Overlap >0.15	Jaccarad Index Overlap >0.1	Jaccarad Index Overlap >0.25	Jaccarad Index Overlap >0.05
0					Fas2													GluRIA,GluRIB,CG11155	Nmdar1							GABA-B-R1	nAChRalpha2,nAChRalpha6,nAChRbeta1,nAChRbeta2				dpr21	DIP-beta,DIP-delta,DIP-kappa	beat-Ia			robo1	Dscam1,Dscam3	fred,ed	Hasp,Lar,Ptp69D,Pxn,Fas2,Nrg,Sema2a,nolo,klg,kirre,CG17839,CG33543
1	y_KCs_1				ey, Dop1R2, trio, sNPF, Fas2		VAChT											GluRIA,GluRIB					Octbeta1R,Oamb		Dop1R1,Dop1R2,Dop2R,DopEcR		nAChRalpha6	sNPF,spab	CG10738,SPR,CCKLR-17D3,CG34357		dpr8,dpr9,dpr10,dpr12			side-VI	kek1,kek3			tutl,ed	Fas2,CG45263			Cluster.8 G-KC, Cluster.22 a/b-KC, Cluster.28 a'/b'-KC		Mushroom.body	ab_KCs, prime_KCs, y_KCs
2	Octopamine_1		fru															GluRIA				Oct-TyrR	Oct-TyrR	5-HT1A			nAChRalpha5,nAChRbeta1	spab	CCKLR-17D3,AstC-R1		dpr4,dpr5,dpr8,dpr13,dpr14,dpr15,dpr18,dpr20		beat-IIIb	side-II,side-III,side-V		robo3	Dscam4	fred	Lar,Pxn,otk,hbs,nolo,plum,lbk,nrm,CG33543,CG34353
3			Sxl																				Octbeta2R,Oamb		Dop2R		nAChRalpha3,nAChRalpha6,nAChRalpha7		AstC-R2,AstA-R1,TrissinR		dpr2,dpr3,dpr11,dpr13,dpr17	DIP-eta,DIP-kappa,DIP-theta	beat-Ib,beat-IV,beat-Va	side	kek3,kek6		Dscam2	tutl	Ptp99A,Pxn,lbk,CG17716,CG44153,CG45263
4					sNPF		ChAT	VGlut										GluRIB	Nmdar2								nAChRalpha6	sNPF,Nplp1,spab	SIFaR,CG33639			DIP-beta	beat-IV,beat-Vc,beat-VII						Hasp,CG17716			Cluster.32	Cluster 114	Cholinergic.neurons.3, Cholinergic.neurons.4, Glutamatergic.neurons
5			Sxl,fru																	mAChR-A	Rdl	TyrR,Oct-TyrR	Oct-TyrR			GABA-B-R3	nAChRalpha1,nAChRalpha3,nAChRalpha5		Dh44-R1,AstC-R2,AstA-R1,CCKLR-17D3,AstC-R1		dpr3,dpr4,dpr6,dpr9,dpr10,dpr12,dpr15	DIP-beta	beat-Ia,beat-IIIb,beat-IV,beat-Va,beat-Vc,beat-VI	side-VI,side-VIII	kek1,kek2,kek5		Dscam2	tutl	Lar,Ptp99A,Fas3,hig,plum,klg,lbk,fra,nrm
6																						Oct-TyrR	Oct-TyrR	5-HT1A			nAChRalpha1,nAChRalpha2,nAChRalpha5	Dh31	AstC-R2,AstC-R1		dpr4,dpr5,dpr13,dpr14,dpr16,dpr17,dpr18,dpr20,dpr21		beat-IIIb	side-III,side-V,side-VI	kek1	robo3	Dscam2,Dscam4		Lar,hbs,hig,plum,lbk,nrm,CG34353,CG44153
7																											nAChRalpha7		FMRFaR		dpr2,dpr3,dpr5,dpr6,dpr14,dpr15	DIP-theta	beat-IIa,beat-IIIb	side,side-III,side-VIII	kek3,kek5,kek6		Dscam2		Pxn,Lac,Fas3,CG17716,CG17839	hid					Ellipsoid_Body
8	VNC_1	hth,Antp																							Dop2R		nAChRalpha3,nAChRalpha7					DIP-beta,DIP-delta,DIP-kappa							Hasp,CG17716	rpr,skl			Cluster 21
9	Tachykinin_1																						Octbeta2R				nAChRalpha3,nAChRalpha5,nAChRalpha7	Tk	FMRFaR,AstA-R1,TrissinR		dpr2,dpr3	DIP-theta	beat-IIa,beat-IIb	side	kek5,kek6		Dscam2	tutl	Pxn,Fas3,sdk,klg,lbk,CG17716,CG6044				Cluster 40, Cluster 80	Cholinergic.neurons.2
10			Sxl				VAChT																Octbeta2R	5-HT1A			nAChRalpha5,nAChRbeta1		AstC-R1		dpr2,dpr3,dpr5,dpr10,dpr12,dpr13,dpr16,dpr17,dpr18		beat-IIa,beat-IIb,beat-IIIc	side,side-III,side-V,side-VI	kek3				Nrg,otk,hbs,fra,nrm,CG34353,CG44153					Cholinergic.neurons.2
11	VNC_2	Antp,Ubx							Gad1,VGAT																		nAChRalpha6,nAChRalpha7	Nplp1				DIP-lambda							Hasp,CG17716			Cluster.12 Pm1/Pm2, Cluster.23 (*), Cluster.32, Cluster.61 dFB, Cluster.65 C2/C3	Cluster 89, Cluster 105	GABAergic.neurons
12																						TyrR,Oct-TyrR	Oct-TyrR			GABA-B-R3	nAChRbeta2		FMRFaR,AstC-R1		dpr6,dpr15	DIP-beta	beat-IIIb,beat-Va,beat-Vc,beat-VI	side-VI,side-VIII					Lar,Ptp99A,Lac,hbs,hig,klg,lbk,nrm
13					Fas2																		Octbeta3R						TkR86C		dpr5,dpr8,dpr9,dpr10		beat-Ia,beat-Ib,beat-Ic,beat-IIIc,beat-VI	side-V	kek2,kek6		Dscam2,Dscam3		Ptp99A,Fas2,Nrg,otk,klg,fra,nrm,CG17839,CG44153		Diap1
14	Octopamine_2																					Oct-TyrR	Oct-TyrR,Oamb	5-HT1A			nAChRalpha5		CCKLR-17D3,AstC-R1		dpr4,dpr5,dpr8,dpr13,dpr18,dpr21		beat-IIIb	side-III,side-V		robo3	Dscam4	fred	Lar,Pxn,otk,hbs,nolo,plum,lbk,nrm,CG34353						Glia_2
15				cry	Dop1R2																		Octbeta2R,Octbeta3R		Dop1R2,DopEcR	GABA-B-R1	nAChRalpha5	spab	CG33639,CG34357,TkR86C,sNPF-R		dpr1,dpr2,dpr10,dpr12,dpr20	DIP-eta	beat-Ib,beat-Ic,beat-IIa,beat-IIIc	side-III	kek2,kek6	robo3	Dscam4	fred,ed	Ptp99A,Nrg,fra,kirre,CG17839,CG33543,CG34353,CG44153
16			fru																							GABA-B-R3	nAChRalpha2,nAChRbeta2		Dh44-R1,AstC-R2,AstA-R1,AstC-R1		dpr3,dpr15	DIP-beta	beat-IIIb,beat-Vc,beat-VI	side-VIII					Lar,Ptp99A,Pxn,Lac,Fas3,hbs,hig,klg,lbk,nrm		Diap1		Cluster 27
17																						Oct-TyrR	Oct-TyrR,Octbeta1R,Octbeta2R				nAChRalpha3		AstC-R2,CCAP-R,CG33639,TkR86C,AstC-R1		dpr1,dpr10,dpr13	DIP-gamma	beat-Ia,beat-Ib,beat-Ic,beat-Va,beat-Vc,beat-VI	side			Dscam1,Dscam3,Dscam4		Nrg,sdk,otk,otk2,fipi,lbk,kirre,rst,CG33543						Cluster_L, Glia_2
18			Sxl		Fas2																		Octbeta2R,Octbeta3R						TkR86C,rk		dpr1,dpr5,dpr8,dpr9,dpr10	DIP-gamma	beat-Ia,beat-Ib,beat-Ic,beat-IIa,beat-IIIc,beat-VI	side-III,side-V	kek1,kek2,kek6	robo3	Dscam1,Dscam2,Dscam3,Dscam4		Ptp99A,Fas2,Nrg,otk,klg,fra,nrm,CG17839,CG44153
19			Sxl																								nAChRalpha5,nAChRalpha7		AstC-R2,SPR,AstC-R1		dpr6		beat-IIIc	side-VI	kek1,kek2		Dscam4	fred,ed	Fas3,Nrg,kirre,rst,CG17839,CG33543
20			fru																Nmdar1								nAChRalpha6	Dh31,Ms	NPFR,CNMaR		dpr1,dpr2,dpr9	DIP-delta,DIP-kappa	beat-IV,beat-VII						Ptp99A,klg,Pvr,CG17716,CG13532,CG45263			Cluster.2, Cluster.15, Cluster.44	Cluster 72, Cluster 114
21	VNC_3, dsx_1	Antp,abd-A,Abd-B	dsx																										SIFaR		dpr20	DIP-delta,DIP-theta	beat-VII			robo2			otk2,CG13532,CG45263				Cluster 4, Cluster 61	Cholinergic.neurons.4
22					Fas2				Gad1,VGAT																DopEcR		nAChRalpha7	Nplp1			dpr1,dpr3	DIP-beta,DIP-eta,DIP-lambda							Lac,Fas2,klg,CG17839,CG45263			Cluster.4, Cluster.30	Cluster 20, Cluster 89	GABAergic.neurons, Cholinergic.neurons.2, Glutamatergic.GABAergic.neurons, GABAergic.neurons	Ellipsoid_Body
23			fru					VGlut										GluRIA,GluRIB							Dop2R		nAChRalpha6	Nplp1	FMRFaR,CCKLR-17D3,CG33639,CNMaR,sNPF-R		dpr7,dpr21	DIP-delta,DIP-kappa,DIP-lambda	beat-IIIc						Lac,Pvr,kirre,CG17716,CG45263				Cluster 72, Cluster 97	Glutamatergic.neurons	Cluster_L
24			fru		Fas2				Gad1,VGAT											mAChR-B				5-HT1B,5-HT2A,5-HT7	Dop2R		nAChRalpha6	Dh31,Nplp1,CCHa2	Dh44-R2,CG13995,CCKLR-17D3,CG33639,TrissinR		dpr7							tutl	Ptp99A,Fas2,sdk,hig,klg			Cluster.2, Cluster.15	Cluster 43, Cluster 72		Cluster_J, Ellipsoid_Body
25				tim					Gad1,VGAT																Dop2R		nAChRalpha6	Nplp1,Gpb5	rk		dpr13,dpr15	DIP-alpha,DIP-kappa,DIP-lambda	beat-Ib,beat-Ic	side-IV		robo2	Dscam3		Lac,nolo,sns,CG17716			Cluster.4	Cluster 59, Cluster 82	Glutamatergic.GABAergic.neurons, GABAergic.neurons	Cluster_B, Cluster_D, Cluster_J, Ellipsoid_Body
26																						TyrR	Octbeta1R,Octbeta2R				nAChRalpha1	Dh31	AstC-R2		dpr1,dpr3,dpr5,dpr6,dpr8,dpr10,dpr13,dpr16,dpr17,dpr20	DIP-gamma,DIP-theta	beat-IIa,beat-IIIb,beat-VI	side,side-III,side-VI,side-VIII				fred,ed	Pxn,Fas3,hbs,lbk,CG17716,CG33543
27	VNC_4	Antp	fru		sNPF, Fas2																				Dop2R		nAChRalpha6	sNPF			dpr6	DIP-delta,DIP-eta				robo2			Fas2,CG45263	rpr,grim,skl			Cluster 8, Cluster 49, Cluster 51, Cluster 53, Cluster 67, Cluster 76, Cluster 93	Mushroom.body, Cholinergic.neurons.6
28																											nAChRalpha3	spab	TrissinR			DIP-kappa,DIP-zeta	beat-VII	side,side-VI			Dscam3		Hasp,Fas3,hig,klg,kirre,rst,CG17716,CG45263	rpr,skl			Cluster 76	Cholinergic.neurons.3	Cluster_L, PN1
29			fru		Fas2		VAChT,ChAT																Octbeta1R					Dh31	CG13995,Dh31-R		dpr7,dpr11,dpr18,dpr21		beat-Ia,beat-IV,beat-VII			robo2		tutl	Hasp,Ptp99A,Fas2,sdk,CG17716,CG13532			Cluster.2, Cluster.17 Mip, Cluster.44, Cluster.47	Cluster 27, Cluster 43, Cluster 61, Cluster 72, Cluster 97, Cluster 113, Cluster 114	Cholinergic.neurons.3, Glutamatergic.neurons	Cluster_B, Cluster_C
30				Pdp1														GluRIA,GluRIB					Octbeta2R,Octbeta3R			GABA-B-R1	nAChRalpha1,nAChRalpha6,nAChRbeta1	spab,Gpb5	AstC-R2,TkR86C,AstC-R1		dpr2,dpr6,dpr11,dpr12,dpr13,dpr16,dpr17	DIP-delta,DIP-kappa		side-III,side-VI,side-VIII	kek1,kek3,kek5		Dscam4		Lar,Ptp99A,Pxn,nolo,plum,CG17716,CG17839,CG45263
31			fru																			Oct-TyrR	Oct-TyrR					AstC	CNMaR,TkR86C			DIP-zeta	beat-VII	side-IV					Lac,kirre,CG17716,CG13532			Cluster.2, Cluster.44	Cluster 27, Cluster 43, Cluster 114	Glutamatergic.neurons
32				Pdp1	sNPF																		Octbeta2R	5-HT2A			nAChRalpha3,nAChRalpha5,nAChRalpha7,nAChRbeta1	Ilp7,sNPF	CG33639,TrissinR		dpr8,dpr9,dpr11,dpr13,dpr17		beat-Ib,beat-Ic	side-IV	kek2,kek5		Dscam2,Dscam4		sdk,kirre,rst,nrm,CG45263			Cluster.63
33	y_KCs_2*			Pdp1	Dop1R2, trio		VAChT,ChAT											GluRIA,GluRIB		mAChR-B		Oct-TyrR	Oct-TyrR,Octbeta2R	5-HT2A,5-HT2B,5-HT7	Dop1R2	GABA-B-R1	nAChRalpha4,nAChRalpha6,nAChRalpha7	AstA	NPFR,SPR,CG32547,Dh31-R,CCAP-R		dpr2,dpr3,dpr4,dpr8,dpr9,dpr12,dpr18		beat-IIIc,beat-VII	side-IV,side-V	kek1		Dscam3,Dscam4	fred,ed	Lar,Ptp69D,nolo,fra,Strn-Mlck,CG45263			Cluster.17 Mip , Cluster.84	Cluster 114		Cluster_A
34				Pdp1														GluRIA,GluRIB				Oct-TyrR	Oct-TyrR			GABA-B-R3	nAChRalpha7		NPFR,Dh44-R2,CCAP-R		dpr15	DIP-zeta	beat-IIIb,beat-IIIc,beat-IV,beat-Va,beat-Vb,beat-Vc	side,side-VIII	kek2		Dscam3	ed	Hasp,otk,nolo,plum,CG17839,CG33543,CG45263	rpr,skl					Cluster_L, Ellipsoid_Body
35	Ellipsoid body																			mAChR-B							nAChRalpha6,nAChRalpha7		Dh44-R1,CG13229,CNMaR		dpr11	DIP-alpha,DIP-zeta	beat-IIIc,beat-Vb,beat-Vc	side		robo3	Dscam3	ed	vn,sdk,klg,CG17716,CG45263					Cholinergic.neurons.2, Glutamatergic.neurons	Cluster_L, Ellipsoid_Body
36	Ilp7_1			Pdp1			ChAT												Nmdar1			TyrR	Octbeta1R		Dop2R		nAChRalpha1,nAChRalpha2,nAChRalpha7,nAChRbeta2	Dh31	AstC-R2,CCKLR-17D3		dpr2,dpr15	DIP-delta,DIP-epsilon,DIP-gamma,DIP-zeta	beat-IV,beat-Vb,beat-Vc,beat-VI		kek2	robo3	Dscam3	tutl,fred,ed	Fas3,Bsg,klg,CG17716,CG15312,CG33543						Cluster_L, Ellipsoid_Body
37	y_KCs_3				ey, Dop1R2, trio, sNPF, Fas2													GluRIA,GluRIB					Octbeta1R		Dop1R1,Dop1R2,Dop2R,DopEcR		nAChRalpha7	sNPF			dpr8,dpr9,dpr10,dpr12			side-VI	kek1,kek3			tutl	Fas2,CG15312,CG45263			Cluster.8 G-KC, Cluster.22 a/b-KC, Cluster.28 a'/b'-KC		Mushroom.body	ab_KCs, Ellipsoid_Body, prime_KCs, y_KCs
38			fru																			Oct-TyrR	Oct-TyrR	5-HT1A			nAChRalpha5	spab	SPR,CCKLR-17D3		dpr4,dpr5,dpr6,dpr20	DIP-gamma	beat-IIIb,beat-IIIc	side,side-III,side-V			Dscam4	fred	Lar,Pxn,Lac,Nrg,otk,hbs,plum,CG33543,CG34353
39	Octopamine_3								Gad1,VGAT															5-HT2B			nAChRalpha7,nAChRbeta1	Gpb5	AstC-R2,Dh31-R,sNPF-R		dpr8,dpr9,dpr14,dpr20	DIP-delta,DIP-theta	beat-Ic,beat-IV,beat-VI,beat-VII		kek1,kek2,kek6	robo3	Dscam1,Dscam3	tutl	Hasp,CG13506,CG34353			Cluster.12 Pm1/Pm2, Cluster.32, Cluster.61 dFB, Cluster.72 Lawf2	Cluster 105
40	Tachykinin_2																										nAChRalpha1,nAChRalpha6,nAChRalpha7	Tk	SIFaR,FMRFaR,CG32547,CG33639		dpr1,dpr15,dpr20	DIP-beta,DIP-gamma,DIP-zeta	beat-Vc,beat-VI,beat-VII	side	kek2	robo2		fred,ed						Cholinergic.neurons.4	Cluster_L
41			fru															GluRIB				TyrR					nAChRalpha6		CNMaR		dpr7,dpr11	DIP-beta,DIP-epsilon,DIP-zeta	beat-Ib,beat-IV,beat-VI,beat-VII					tutl	Hasp,Bsg,nolo,Pvr,kirre,CG17716						Cluster_C
42			fru					VGlut										GluRIA,GluRIB							Dop2R		nAChRalpha6,nAChRalpha7	Nplp1	CG33639,CNMaR		dpr6	DIP-delta	beat-IIIb,beat-Vb,beat-VI	side-VI		robo2			Hasp,Lac,Fas3,CG45263	rpr,grim,skl				Glutamatergic.GABAergic.neurons	Cluster_J, Ellipsoid_Body
43	Tachykinin_3		fru		sNPF		VAChT																	5-HT1B	Dop1R1		nAChRalpha6	sNPF,Tk	NPFR,CCKLR-17D3		dpr6,dpr9,dpr11,dpr15,dpr16	DIP-beta				robo3		fred	Lac,Fas3,sdk	skl					Cluster_C
44				Pdp1			ChAT																						SPR,sNPF-R			DIP-delta,DIP-gamma	beat-IIa,beat-IIb	side-IV		robo2			Fas3,CG6044				Cluster 105		Cluster_G
45							ChAT													mAChR-A				5-HT7	Dop1R1,DopEcR		nAChRalpha3		SIFaR,FMRFaR,CCKLR-17D3,CG33639		dpr7,dpr10,dpr11,dpr15,dpr18,dpr21	DIP-beta,DIP-gamma,DIP-kappa	beat-Ib,beat-Ic,beat-IIa,beat-IIb,beat-IIIc	side-IV				fred	Hasp,Ptp99A,nolo,fra,CG44153,CG45263	skl			Cluster 114
46			fru				VAChT,ChAT																		Dop1R1,Dop2R		nAChRalpha6	Dh31,CCHa2	Lkr,NPFR,CG33639		dpr13,dpr15	DIP-delta	beat-Ia,beat-IIa,beat-IV,beat-Vb	side-IV	kek2	robo2,robo3	Dscam2		Hasp,Ptp99A,hig,kirre,rst,CG17716,CG33543,CG45263	rpr,skl
47	dsx_2		dsx				VAChT															TyrR			Dop1R1			Dh44	Dh44-R2,CNMaR		dpr7,dpr21	DIP-delta	beat-IIa				Dscam3	fred,ed	Fas3,otk,klg,sns
48	ab_KCs_1				Dop1R2, Fas2		VAChT,ChAT												Nmdar2						Dop1R2		nAChRalpha6	spab	CG33639,TkR86C,AstC-R1		dpr1,dpr2,dpr3,dpr6,dpr13	DIP-eta	beat-Ia,beat-Ib,beat-Ic,beat-IIIc,beat-Vb,beat-Vc	side-III,side-VI		robo3	Dscam4		Fas2,Nrg,otk,hbs,rst
49	Tachykinin_4		fru				VAChT,ChAT																	5-HT1B	Dop1R1	GABA-B-R3	nAChRalpha6	Dh31,Dh44,Tk	CG13995,SPR,CCKLR-17D3,CNMaR,TrissinR		dpr6,dpr11	DIP-epsilon,DIP-gamma,DIP-kappa,DIP-theta	beat-Va,beat-Vb,beat-Vc	side,side-VIII	kek2			ed	Hasp,Bsg,nolo,CG44153,CG45263				Cluster 51	Cholinergic.neurons.6	Cluster_J, Cluster_L
50	ab_KCs_2*		fru		sNPF, Fas2																	TyrR		5-HT1B	Dop1R1,Dop2R			sNPF	NPFR,CG13995,FMRFaR			DIP-beta,DIP-delta		side-IV			Dscam3		Lac,Fas2,hig,nolo,klg	rpr
51	Tyramine and Octopamine_1, mushroom body KCs		fru		ey, Dop1R2				Gad1,VGAT						Tdc2					mAChR-B			Octbeta3R	5-HT1A,5-HT2A,5-HT7	Dop1R1,Dop1R2			Nplp1	NPFR,Pdfr,SPR,CCKLR-17D3,RYa-R		dpr2,dpr10,dpr18	DIP-beta,DIP-lambda,DIP-theta	beat-IIa,beat-IIb	side-III,side-IV,side-VI			Dscam3	fred	Hasp,Lac,Fas2,hig,sns,CG17716,CG44153					GABAergic.neurons
52																							Octbeta2R				nAChRalpha5,nAChRbeta1		TkR86C,sNPF-R		dpr6,dpr10,dpr11,dpr13,dpr14	DIP-epsilon,DIP-kappa,DIP-zeta	beat-Ia,beat-Ib,beat-Ic,beat-IIIc	side-IV,side-V			Dscam1,Dscam3	ed	Fas3,Nrg,hig,nolo,CG34353,CG44153
53			Sxl																		Rdl	TyrR,Oct-TyrR	Oct-TyrR,Octbeta2R,Octbeta3R			GABA-B-R1	nAChRalpha3,nAChRalpha5,nAChRalpha7		Dh44-R1,AstC-R2,FMRFaR		dpr1,dpr8,dpr9,dpr10,dpr13,dpr20	DIP-kappa,DIP-theta	beat-Ib,beat-Ic,beat-IV,beat-Va,beat-Vb,beat-Vc	side,side-VI,side-VIII	kek2,kek5,kek6		Dscam2	tutl	vn,Ptp99A,lbk,kirre,rst,CG33543,CG34353,CG44153			Cluster.13	Cluster 80, Cluster 95	Cholinergic.neurons.3
54	Octopamine_4			Pdp1			VAChT,ChAT													mAChR-B							nAChRalpha2,nAChRalpha7		Dh44-R1,SPR,TrissinR,sNPF-R			DIP-eta			kek1				Hasp,Fas2,Bsg,nolo,plum,CG6044			Cluster.23 (*) , Cluster.27 OPN: adPN and lPN, Cluster.32, Cluster.72 Lawf2	Cluster 105
55	Tachykinin_5		fru															GluRIA,GluRIB				TyrR,Oct-TyrR	Oct-TyrR,Oamb				nAChRalpha3	Dh31,Tk,Gpb5	Dh44-R1,CG13995,AstC-R1,sNPF-R		dpr1,dpr21	DIP-delta,DIP-epsilon,DIP-zeta	beat-VII			robo2	Dscam3		nolo,klg,CG33543
56								VGlut											Nmdar2	mAChR-B		TyrR			Dop2R		nAChRalpha1,nAChRalpha6	Nplp1	SIFaR,Gyc32E,TrissinR,sNPF-R		dpr9		beat-Ic,beat-IIa,beat-IV					fred	Fas3					Glutamatergic.neurons	Cluster_J
57	VNC_5	Antp, Ubx	fru																			Oct-TyrR	Oct-TyrR,Octbeta1R						NPFR,Dh44-R2,CG33639,CNMaR		dpr6,dpr11,dpr12,dpr18	DIP-delta,DIP-iota	beat-Ia	side,side-IV		robo2			trol,Pvr
58	Dopamine_1										Vmat		DAT,ple										Oamb	5-HT2A,5-HT7	Dop1R1		nAChRalpha2,nAChRalpha3	Gpb5	CG10738,Dh44-R1,AstC-R2,CG13995,FMRFaR,CG33639,CG34357,Lgr1		dpr2,dpr4,dpr15,dpr16	DIP-delta,DIP-kappa	beat-Va,beat-Vb,beat-Vc,beat-VI	side,side-IV,side-VI	kek1,kek5	robo3	Dscam2,Dscam3		vn,Fas2,Fas3,sdk,plum,unc-5,Pvr,kirre,rst,CG17716,CG15312			Cluster.42 Dopaminergic		Monoaminergic.neurons	Dopamine
59	Octopamine_5			per	Dop1R2				Gad1,VGAT									GluRIB		mAChR-A				5-HT1B	Dop1R1,Dop1R2		nAChRalpha3	Dh31	Dh31-R,sNPF-R		dpr1,dpr8,dpr11	DIP-alpha,DIP-delta,DIP-gamma,DIP-kappa,DIP-theta	beat-Ia,beat-IIIb,beat-Vb,beat-Vc	side-V,side-VIII			Dscam3		Lac,Fas3,plum,CG6044			Cluster.27 OPN: adPN and lPN, Cluster.32	Cluster 105		Cluster_I, Ellipsoid_Body
60									Gad1,VGAT									GluRIA,GluRIB					Octbeta3R,Oamb	5-HT2A	Dop2R		nAChRalpha1,nAChRalpha2,nAChRalpha7	Dh31,Nplp1	SIFaR,SPR,CG32547		dpr11	DIP-beta,DIP-lambda	beat-VII	side	kek1				Fas2,sdk,Bsg,klg,unc-5,kirre				Cluster 89	Cholinergic.neurons.4, Glutamatergic.GABAergic.neurons, GABAergic.neurons	Cluster_I, Cluster_J, Ellipsoid_Body
61					ey				VGAT											mAChR-B			Oamb				nAChRalpha1,nAChRalpha7	Gpb5	Dh44-R1,TrissinR		dpr1,dpr12	DIP-beta,DIP-epsilon,DIP-lambda	beat-Ib,beat-Ic,beat-VI,beat-VII		kek2				Nrg,otk2,CG45263			Cluster.32	Cluster 98, Cluster 105		Glia_2
62	Ilp7_2				trio		ChAT														Rdl		Octbeta1R,Octbeta2R	5-HT2B			nAChRalpha1,nAChRalpha2,nAChRalpha7	Ilp7,spab	FMRFaR		dpr15	DIP-epsilon	beat-IIb,beat-Va,beat-Vb,beat-VI	side-III,side-VIII	kek1,kek2	robo3	Dscam3		Fas2,Bsg,klg,nrm,CG17716,CG45263			Cluster.23 (*) , Cluster.27 OPN: adPN and lPN, Cluster.32, Cluster.72 Lawf2	Cluster 105
63	Tachykinin_6			Pdp1			VAChT,ChAT																	5-HT1A,5-HT7	Dop1R1			Tk	SIFaR,CG13229,SPR,FMRFaR,TrissinR		dpr1,dpr5,dpr11	DIP-beta,DIP-delta,DIP-zeta	beat-Ia,beat-VI						Hasp,nolo,CG44153,CG45263	rpr
64	Campta		fru				VAChT											GluRIA,GluRIB							Dop2R,DopEcR		nAChRalpha3		SPR,CG33639,TrissinR		dpr8,dpr9,dpr11	DIP-theta	beat-IIIc,beat-Va,beat-Vb,beat-Vc,beat-VI	side-VI	kek1	robo2			CG6044	rpr,grim,skl
65							VAChT,ChAT											GluRIA,GluRIB		mAChR-A		TyrR	Octbeta2R				nAChRalpha5,nAChRbeta1	spab			dpr9,dpr10	DIP-gamma	beat-Ia,beat-Ib,beat-Ic,beat-IIa		kek2,kek3		Dscam4	fred	Fas3,sdk,otk,otk2,hbs,CG44153,CG45263			Cluster.6
66	VNC_6	Antp						VGlut										GluRIB				TyrR			Dop2R	GABA-B-R3		Nplp1	CG10738,AstA-R1		dpr2,dpr3	DIP-epsilon,DIP-gamma,DIP-lambda	beat-IIIc,beat-Vb,beat-Vc	side-IV	kek2	robo2,robo3			Hasp,sdk,Pvr,rst,CG33543	rpr		Cluster.12 Pm1/Pm2, Cluster.23 (*), Cluster.32, Cluster.61 dFB, Cluster.65 C2/C3, Cluster.72 Lawf2	Cluster 105
67	VNC_7	Antp,Ubx																GluRIA,GluRIB									nAChRalpha7		SIFaR,Dh44-R1,TrissinR		dpr3	DIP-kappa	beat-IIIb				Dscam3	tutl	Lac,nolo				Cluster 39, Cluster 68, Cluster 80, Cluster 93, Cluster 95	GABAergic.neurons	Cluster_L, Ellipsoid_Body
68	dsx_3		dsx																				Octbeta2R	5-HT2A,5-HT2B,5-HT7	Dop1R1,Dop2R,DopEcR	GABA-B-R3			AstC-R2,FMRFaR,TrissinR		dpr16,dpr17,dpr18,dpr21	DIP-gamma,DIP-theta,DIP-zeta	beat-Ia,beat-Ib,beat-Ic	side-IV			Dscam3	fred,ed	vn,nolo,klg,kirre,rst,CG17716,CG17839
69		exd	Sxl															GluRIB		mAChR-A				5-HT2B	DopEcR		nAChRalpha3,nAChRalpha5,nAChRalpha7,nAChRbeta2		AstC-R2,CG34357		dpr9		beat-Ib,beat-Ic,beat-IV	side				tutl	vn,Nrg,kirre,rst				Cluster 80
70					sNPF, Fas2		VAChT,ChAT																	5-HT7			nAChRbeta2	Proc,sNPF	Gyc32E,sNPF-R,rk		dpr4,dpr20	DIP-eta,DIP-theta	beat-Ia,beat-IIIb,beat-IV		kek1,kek3		Dscam3		Fas3,klg,kirre,CG15312,CG45263					Cholinergic.neurons.3, Cholinergic.neurons.6
71									Gad1,VGAT										Nmdar1,Nmdar2			TyrR	Oamb	5-HT2B	Dop2R		nAChRalpha1,nAChRalpha6	Nplp1	Dh44-R1,CG33639,sNPF-R		dpr1,dpr11,dpr15,dpr18	DIP-alpha,DIP-beta,DIP-zeta	beat-Ib,beat-Ic,beat-IIa,beat-IIb,beat-VII					ed	vn,CG17716,CG33543				Cluster 72, Cluster 84, Cluster 97, Cluster 113, Cluster 114		Cluster_J
72							VAChT,ChAT											GluRIA,GluRIB		mAChR-A					Dop1R1	GABA-B-R3			SIFaR,CG13995,CG33639,CG34357,TrissinR		dpr1,dpr13	DIP-alpha	beat-Ia,beat-IIa,beat-IIb,beat-IIIc,beat-IV,beat-Va,beat-Vb,beat-VII	side,side-VIII	kek3		Dscam3	fred,ed	otk,kirre,CG6044	skl				Cholinergic.neurons.3
73	Serotonin and Octopamine_1, ab_KCs_3				Dop1R2, sNPF, Fas2		VAChT,ChAT							SerT						mAChR-A			Octbeta2R	5-HT1A,5-HT1B	Dop1R2,Dop2R			spab	SIFaR,CG31183,Dh31-R		dpr5,dpr9,dpr11,dpr20	DIP-delta	beat-Vb,beat-Vc,beat-VI				Dscam3,Dscam4	ed	Ptp99A,sns,CG17716,CG45263				Cluster 27, Cluster 61, Cluster 72, Cluster 114	Cholinergic.neurons.3
74	Dopamine_2				trio						Vmat		DAT,ple										Octbeta1R,Oamb	5-HT1B,5-HT2A	Dop2R		nAChRalpha3		CG10738,Dh44-R1,AstC-R2,CG13995		dpr1,dpr2,dpr4,dpr5,dpr6,dpr9,dpr10,dpr11,dpr16,dpr18,dpr20,dpr21		beat-Ib	side,side-VIII	kek1,kek3	robo2,robo3	Dscam2,Dscam3	ed	Fas2,sdk,hig,nolo,CG13532,CG15312,CG6044	skl		Cluster.42 Dopaminergic	Cluster 72	Monoaminergic.neurons	Dopamine
75				Pdp1	sNPF, Fas2				Gad1,VGAT													TyrR	Octbeta2R,Octbeta3R	5-HT2A			nAChRalpha3	Proc,sNPF	AstA-R1,CG31183,Dh31-R,CG33639,CNMaR,TrissinR		dpr3,dpr6	DIP-kappa,DIP-lambda	beat-IIa,beat-IIb,beat-Va,beat-Vb,beat-Vc	side-III,side-VIII			Dscam3		Fas2,CG6044			Cluster.27 OPN: adPN and lPN, Cluster.32, Cluster.72 Lawf2	Cluster 105
76								VGlut											Nmdar2			Oct-TyrR	Oct-TyrR	5-HT1B,5-HT2A			nAChRalpha3	Dh31,Nplp1,CCHa1	AstA-R1,CNMaR			DIP-delta	beat-Va,beat-Vb	side-VIII			Dscam4		Fas2,Fas3,CG33543	rpr
77							VAChT,ChAT													mAChR-A		TyrR		5-HT1A,5-HT1B	Dop1R1,DopEcR		nAChRalpha3,nAChRalpha5,nAChRalpha6	Gpb5	SIFaR,Dh44-R1,SPR,CG33639,sNPF-R		dpr2,dpr20		beat-IIa,beat-Vc,beat-VII		kek2		Dscam3	fred,ed	nolo,sns,kirre,CG33543,CG6044
78																																							CG7607				Cluster 23, Cluster 70	Glial.cells.1, Glial.cells.2, Prothoracic.gland	Astrocytes, Cluster_M, FatBody, Glia_1, Glia_2
79			Sxl																Nmdar1		Rdl		Octbeta2R				nAChRalpha1,nAChRalpha5		SPR,TkR99D,AstC-R1		dpr2,dpr3,dpr11,dpr16	DIP-gamma,DIP-kappa	beat-IIa,beat-IIb		kek2,kek5		Dscam4	ed	Fas2,Fas3,sdk,otk,trol,CG44153,CG45263
80	VNC_8	Antp,Ubx					VAChT,ChAT											GluRIA,GluRIB				TyrR,Oct-TyrR	Oct-TyrR	5-HT1A,5-HT2A	Dop2R		nAChRalpha3		SIFaR,CG33639,CG34357,TrissinR		dpr1,dpr13	DIP-alpha,DIP-kappa	beat-IIIb			robo2,robo3		ed	Hasp,Fas2,rst,CG17716,CG17839			Cluster.27 OPN: adPN and lPN, Cluster.32	Cluster 105
81	ab_KCs_4*		fru		sNPF, Fas2																				Dop2R			sNPF	CNMaR,TrissinR,TkR99D		dpr7,dpr9,dpr11,dpr17,dpr21	DIP-beta	beat-VI,beat-VII	side-VIII	kek3		Dscam3	fred,ed	Hasp,Fas3,Sema2a,Bsg,nolo,klg,kirre,rst,CG13532,CG6044	rpr,grim,skl
82							VAChT,ChAT																Octbeta1R	5-HT7	Dop1R1		nAChRalpha1	Dh31,CCHa2,Gpb5	Dh44-R1,Dh44-R2,CG13995,CCHa1-R,CCKLR-17D1,CCKLR-17D3		dpr2,dpr3,dpr8	DIP-gamma,DIP-theta,DIP-zeta	beat-Ib,beat-Ic,beat-IIa,beat-IV,beat-Vc		kek1,kek3		Dscam3	tutl	sdk,nolo,Pvr,CG44153,CG45263					Cholinergic.neurons.6
83					Fas2		VAChT,ChAT												Nmdar2	mAChR-B	Rdl,Grd		Octbeta1R				nAChRalpha6		Lkr,CCKLR-17D3		dpr1,dpr9,dpr12	DIP-alpha,DIP-delta,DIP-theta	beat-IV,beat-VI	side-V	kek1	robo2,robo3		ed	Hasp,Lac,Fas2,rst,CG17716,CG34353		Diap1
84			fru		ey		VAChT,ChAT											GluRIA,GluRIB	Nmdar1,Nmdar2			Oct-TyrR	Oct-TyrR		Dop1R1				NPFR,Dh31-R,TrissinR,sNPF-R		dpr6,dpr8,dpr10,dpr14,dpr21	DIP-beta	beat-IIa,beat-IIIc,beat-Va,beat-Vb,beat-Vc	side-III			Dscam2	fred	Hasp,vn,Lac,hig,unc-5,CG13532	skl		Cluster.32	Cluster 105
85																					Lcch3				Dop1R1		nAChRalpha6		Lkr,Dh44-R1,FMRFaR,CG31183,CG33639,TrissinR,sNPF-R		dpr6,dpr15,dpr18	DIP-epsilon,DIP-zeta	beat-IIa,beat-IIb,beat-IV	side-IV,side-VIII		robo2,robo3	Dscam3		Fas3,nolo,CG45263	skl
86	Serotonin and Octopamine_2			cry				VGlut						SerT						mAChR-B	Grd	TyrR	Oamb		Dop2R		nAChRalpha6	Nplp1	SIFaR,Pdfr,AstA-R1,CG31183,CG32547,Dh31-R,Gyc32E,CNMaR		dpr11,dpr12,dpr16,dpr17,dpr20		beat-Ia,beat-IIIc				Dscam1,Dscam3,Dscam4		Ptp99A,Nrg,Bsg,klg,fra,CG16974,CG44153		Bruce,Diap2
87			Sxl					VGlut										GluRIA,GluRIB									nAChRalpha5				dpr1,dpr8,dpr11		beat-Ib,beat-IIIc	side-V,side-VIII	kek1,kek3,kek5		Dscam4	tutl,ed	Lar,Pxn,Nrg,sdk,plum
88	Tachykinin_7, VNC_9	Antp			sNPF, Fas2															mAChR-A	Rdl	TyrR	Octbeta2R,Octbeta3R				nAChRalpha5	sNPF,Tk,Gpb5	CrzR,SIFaR,FMRFaR,TrissinR		dpr5,dpr10,dpr11,dpr17	DIP-beta,DIP-eta	beat-Ia,beat-VII	side,side-V	kek5	robo3	Dscam2,Dscam4	tutl	nolo,klg				Cluster 33	Cholinergic.neurons.3	Cluster_A, Cluster_D, Cluster_J
89	NPF, Dopamine_3			sgg	Fas2						Vmat		DAT,ple						Nmdar1,Nmdar2				Oamb			GABA-B-R3	nAChRalpha1,nAChRalpha2,nAChRalpha3	NPF,Gpb5	CG10738,Dh44-R2,CCHa2-R,CCAP-R		dpr1,dpr9,dpr11,dpr13,dpr15	DIP-delta	beat-Ia,beat-Va,beat-Vb,beat-Vc		kek1	robo2,robo3	Dscam1,Dscam2		Fas2,Fas3,sdk,Bsg,CG15312			Cluster.42 Dopaminergic		Monoaminergic.neurons	Dopamine, Ellipsoid_Body
90					ey				Gad1,VGAT															5-HT1A,5-HT1B	Dop1R1,Dop2R,DopEcR	GABA-B-R3	nAChRalpha6,nAChRalpha7		SIFaR,CG13229,AstA-R1,CG31183,Dh31-R		dpr8	DIP-lambda,DIP-theta,DIP-zeta	beat-Ib,beat-Ic,beat-Va,beat-Vb	side-IV	kek3			ed	Ptp99A,sns,CG17839,CG45263			Cluster.32	Cluster 105	GABAergic.neurons
91	Lgr3 Median Bundle_1		fru		sNPF, Fas2			VGlut											Nmdar1		Grd	TyrR						sNPF,Nplp1	CG10738,NPFR,Lgr3,CG32547,Gyc32E,CG33639,TkR86C,sNPF-R		dpr1,dpr16	DIP-delta,DIP-epsilon,DIP-gamma,DIP-lambda	beat-IIIc,beat-IV,beat-VII	side,side-IV					vn,Fas2,sdk,ImpL2,plum,unc-5,CG17716,CG13532,CG13506,CG45263,CG6044				Cluster 84, Cluster 114
92	Serotonin and Octopamine_3		fru					VGlut						SerT							Grd	TyrR		5-HT2B	Dop1R1,Dop2R		nAChRalpha6	AstC,Nplp1,AstCC	SIFaR,Dh44-R2,Gyc32E,Lgr1		dpr11,dpr12,dpr16,dpr17,dpr20	DIP-lambda	beat-IIa,beat-IV	side-V			Dscam3		Ptp99A,Lac,Nrg,CG17716,CG13532,CG33543	rpr			Cluster 72
93	Lgr3 Median Bundle_2							VGlut										GluRIA,GluRIB				TyrR	Octbeta1R			GABA-B-R3	nAChRalpha6		Lkr,Dh44-R1,SPR,CCHa1-R,Lgr3,CCKLR-17D3		dpr3,dpr13	DIP-gamma,DIP-kappa,DIP-zeta	beat-IV		kek2		Dscam3		Hasp,hig,nolo,kirre,CG44153
94					sNPF				Gad1,VGAT									GluRIB			Lcch3		Octbeta2R				nAChRalpha6	Mip,sNPF,Nplp1	Pdfr,FMRFaR,CG31183,AstC-R1,sNPF-R		dpr1,dpr6,dpr7,dpr13,dpr14,dpr17,dpr20	DIP-delta,DIP-lambda	beat-IV	side		robo2,robo3	Dscam3		nolo,CG44153					GABAergic.neurons
95	ab_KCs_5				ey, Fas2		VAChT,ChAT											GluRIB	Nmdar1,Nmdar2					5-HT1B,5-HT2A,5-HT2B	Dop2R		nAChRalpha1,nAChRalpha2	Ms	SIFaR,CG34357,sNPF-R		dpr9,dpr12,dpr20	DIP-delta	beat-Vc	side-IV,side-VI,side-VIII					Hasp,Pxn,Fas2,Bsg,nolo,sns,kirre,rst,CG17716,CG15312,CG45263			Cluster.27 OPN: adPN and lPN, Cluster.32, Cluster.72 Lawf2	Cluster 105
96									VGAT									GluRIA,GluRIB	Nmdar2					5-HT1A,5-HT1B	DopEcR	GABA-B-R3	nAChRalpha1	Nplp1	CG33639,CNMaR,sNPF-R		dpr6,dpr9,dpr10,dpr16	DIP-epsilon,DIP-lambda,DIP-theta	beat-IIa,beat-IIb,beat-IV,beat-Va,beat-Vb,beat-Vc,beat-VI	side-IV			Dscam4	fred	sdk,hig,nrm,CG17716,CG33543,CG45263					GABAergic.neurons
[truncated: 16 more rows]

## Sheet: 7.Overlap with Davie et al.
	Number of intersecting marker genes
[truncated: 229 more rows]
[truncated: 38 more columns]

## Sheet: 8.Overlap with Allen et al.
	Number of intersecting marker genes
[truncated: 229 more rows]
[truncated: 71 more columns]

## Sheet: 9.Overlap with Avalos et al.
	Number of intersecting marker genes
[truncated: 229 more rows]

[truncated: 4 more sheets: 10. Overlap with Croset et al., 11.Gene overlap with fruP1 TRAP, 12.FullDataTFMarkerGenes, 13.MarkerGenesIntegrated]
