# Supplementary material for: Single-cell transcriptome profiles of Drosophila fruitless-expressing neurons from both sexes
Source: eLife. 2023 Feb 1;12:e78511. doi: 10.7554/eLife.78511 (PMC9891730; doi:10.7554/eLife.78511)
Supplement: Source data 4. — Excel data table containing GO enrichment results. [file elife-78511-data4.xlsx]

## Sheet: README
Source data 4: All gene ontology (GO) results
GO enrichment performed with Flymine v. 52 or ClusterProfiler v. 3.14.3 using a Benjamini Hochberg adjusted p-value cutoff <0.05, unless otherwise noted
Sheets:
Sheet number	List	Analysis	# of Genes	List Description
1	Marker gene lists for each data set	ClusterProfiler		Full GO table corresponding to Supplemental Figure 6A-C: molecular function, biological process, and cellular component
2	MaleDataSetGO	Flymine	3582	GO enrichment for protein domain and pathway for the male data set marker gene list
3	FemaleDataSetGO	Flymine	3203	GO enrichment for protein domain and pathway for the female data set marker gene list
4	FullDataSetGO	Flymine	3662	GO enrichment for protein domain and pathway for the full data set marker gene list
5	dsxSubcluster1	Flymine	112	GO enrichment for protein domain and pathway for the genes unique to dsx subcluster analysis cluster 1 (Source data 6), using a Benjamini Hochberg adjusted p-value cutoff <0.1
6	dsxSubcluster2	Flymine	84	GO enrichment for protein domain and pathway for the genes unique to dsx subcluster analysis cluster 2 (Source data 6), using a Benjamini Hochberg adjusted p-value cutoff <0.1
7	dsxSubcluster4	Flymine	111	GO enrichment for protein domain and pathway for the genes unique to dsx subcluster analysis cluster 4 (Source data 6), using a Benjamini Hochberg adjusted p-value cutoff <0.1
8	MBSubcluster4	Flymine	95	GO enrichment for marker genes in mushroom body subcluster analysis cluster 4 (Source data 6), using a Benjamini Hochberg adjusted p-value cutoff <0.05
9	DopamineCluster58	Flymine	72	GO enrichment for protein domain and pathway for the genes unique to dopamine cluster 56 in full data analysis compared to dopaminergic clusters 74 and 89 (Genes with p_val_adj<0.05, Source data 6), using a Benjamini Hochberg adjusted p-value cutoff <0.05
10	DopamineCluster74	Flymine	77	GO enrichment for protein domain and pathway for the genes unique to dopamine cluster 74 in full data analysis compared to dopaminergic clusters 58 and 89 (Genes with p_val_adj<0.05, Source data 6), using a Benjamini Hochberg adjusted p-value cutoff <0.05
11	DopamineCluster89	Flymine	114	GO enrichment for protein domain and pathway for the genes unique to dopamine cluster 89 in full data analysis compared to dopaminergic clusters 58 and 74 (Genes with p_val_adj<0.05, Source data 6), using a Benjamini Hochberg adjusted p-value cutoff <0.05
12	MaleDopamine56	Flymine	109	GO enrichment for protein domain and pathway for the genes unique to dopamine cluster 56 in male data analysis compared to dopaminergic cluster 67 (Genes with p_val_adj<0.05, Source data 3), using a Benjamini Hochberg adjusted p-value cutoff <0.05
13	MaleDopamine67	Flymine	161	GO enrichment for protein domain and pathway for the genes unique to dopamine cluster 67 in male data analysis compared to dopaminergic cluster 56 (Genes with p_val_adj<0.05, Source data 3), using a Benjamini Hochberg adjusted p-value cutoff <0.1
10	MalevsFemaleMarkerGenes	ClusterProfiler		Full GO table corresponding to Figure 1 - figure supplement 6: molecular function, biological process, and cellular component
11	Uniquetomalesinclusters	Flymine	711	GO for the list that are significantly differentially expressed between male and female fru P1 neurons within each cluster (p<0.05) that are higher in and unique to males (Source data 9)
12	Uniquetofemalesinclusters	Flymine	586	GO for the list that are significantly differentially expressed between male and female fru P1 neurons within each cluster (p<0.05) that are higher in and unique to females (Source data 9)
13	DiffExpressedinBothSexes	Flymine	147	GO for the list of genes that are significantly differentially expressed between male and female fru P1 neurons within each cluster (p<0.05) that are higher in males or in females in at least one cluster (Source data 9)

## Sheet: 1. All marker genes
Table name	Analysis		List Description
Marker gene lists for each data set	ClusterProfiler		Full GO table corresponding to Figure 1 - figure D-F: molecular function, biological process, and cellular component
Gene lists in table: Male marker genes, Female marker genes, Full data set marker genes
GeneRatio=total number of genes in our list recognized within the database/number of genes belonging to particular GO category in database	BgRatio= Bg Ratio indicates the number of genes annotated to a pathway within the specific list of differential genes among the major contributors that are included in the database versus the number of genes annotated to a pathway within the background. Background considers all differential genes included in GO term database.
			Molecular Function											Biological Process											Cellular Component
Cluster	ID	Description	GeneRatio	BgRatio	pvalue	p.adjust	qvalue	geneID	Count		Cluster	ID	Description	GeneRatio	BgRatio	pvalue	p.adjust	qvalue	geneID	Count		Cluster	ID	Description	GeneRatio	BgRatio	pvalue	p.adjust	qvalue	geneID	Count
Male.marker.genes	GO:0004930	G protein-coupled receptor activity	61/2323	118/12127	1.77304e-15	6.66549e-13	4.48957e-13	CG13579/AstC-R1/GABA-B-R3/AstC-R2/mGluR/TyrR/FMRFaR/DopEcR/GABA-B-R2/mAChR-A/GABA-B-R1/5-HT1A/Oct-TyrR/stan/AstA-R1/CG12290/Octbeta2R/CG43795/Dop2R/CG44153/TrissinR/TkR86C/Octbeta3R/CCKLR-17D3/Dh31-R/Octbeta1R/CG31760/CG13995/5-HT7/CCAP-R/mtt/Oamb/Dop1R1/mAChR-B/CG33639/Dh44-R2/5-HT2A/5-HT1B/mthl1/sNPF-R/SPR/Cirl/Dh44-R1/CNMaR/smog/Dop1R2/Lkr/SIFaR/NPFR/rk/5-HT2B/Rh7/Lgr4/mthl10/CG13229/CG32547/P…	61		Male.marker.genes	GO:0031175	neuron projection development	268/2449	492/12275	1.8722e-67	5.40318e-64	2.67233e-64	prel/path/Rtca/Imp/dsx/Wnt4/Mp/tsr/fend/beat-Vc/hdc/ct/Trim9/ap/ham/14-3-3epsilon/Ptp99A/sky/trn/Fas3/p120ctn/put/Lar/Hsc70-4/beat-VI/Nrt/M6/caps/CkIIalpha/Mmp2/Cont/Snoo/BuGZ/SelR/CSN5/CadN/Appl/Cam/Bsg/Sdc/futsch/Ten-a/PlexA/tutl/Dscam2/pros/Nrg/Con/fra/fax/shot/sli/Ten-m/Toll-7/beat-Ic/tok/beat-IIb/beat-Va/CadN2/Lis-1/Dg/DIP-gamma/Sema1a/Sar1/robo1/drl/Fas1/Dhc64C/Nrk/dpr11/Frl/Fas2/stai/scro/…	268		Male.marker.genes	GO:0045202	synapse	153/2364	283/11938	2.4746e-38	1.25215e-35	6.51211e-36	Hasp/Tob/Cbp53E/VGAT/fwe/cpx/nwk/Sap47/Gdi/Rab3/Syp/sky/Fas3/nAChRbeta2/nAChRalpha2/Frq2/Rpt3/RabX4/hig/Rab11/Prosalpha7/CaMKII/Cals/Bsg/Nrx-1/Sdc/futsch/Ten-a/wls/nSyb/Con/Rdl/drpr/Ten-m/Dap160/Nlg4/Rbp/Dg/Tomosyn/nAChRalpha3/unc-13-4A/Fas2/Nrx-IV/stai/Spn/eIF4E1/veli/X11Lbeta/Smn/dlp/wit/GluClalpha/Syx1A/nAChRalpha6/nAChRalpha7/Dys/Nlg2/Prosap/inaE/cac/kek6/Syx6/Fife/Exn/Rim/orb/CanB2/Nlg3/Alk/…	153
Male.marker.genes	GO:0003700	DNA-binding transcription factor activity	159/2323	462/12127	2.06043e-15	6.66549e-13	4.48957e-13	hth/abd-A/Ubx/Abd-B/tsh/Antp/dsx/Blimp-1/Lim1/bi/toy/ap/ham/CG9650/luna/Hr4/emc/Eip78C/Eip75B/pros/crp/scro/Adf1/CG43689/dmrt99B/SoxN/CG16779/Octbeta2R/pan/lola/lilli/Dad/ftz-f1/Sox21b/D/bab1/bab2/CG9932/CG12605/REPTOR/Eip74EF/cg/trx/Hr3/chn/cic/Mad/Smox/FoxP/EcR/Hr38/kay/NK7.1/Atf3/Trf2/NFAT/nvy/shn/CG43347/fru/Atf6/Xbp1/caup/ara/fd59A/TfAP-2/tup/pdm3/Mef2/dan/danr/vvl/bun/sima/onecut/Taf4/odd/C…	159		Male.marker.genes	GO:0048858	cell projection morphogenesis	252/2449	462/12275	1.70708e-63	2.02061e-60	9.99361e-61	prel/path/dsx/Wnt4/Mp/tsr/fend/beat-Vc/hdc/ct/Trim9/ap/ham/14-3-3epsilon/Ptp99A/trn/Fas3/p120ctn/put/Lar/Hsc70-4/beat-VI/Nrt/caps/CkIIalpha/Mmp2/Cont/Snoo/BuGZ/SelR/CSN5/CadN/Appl/Cam/Bsg/Sdc/futsch/Ten-a/PlexA/tutl/Dscam2/pros/Nrg/fra/fax/shot/sli/Ten-m/Toll-7/beat-Ic/tok/beat-IIb/beat-Va/CadN2/Lis-1/Dg/DIP-gamma/Sema1a/Sar1/robo1/drl/Fas1/Dhc64C/Nrk/dpr11/Frl/Fas2/scro/fz2/sbb/smt3/robo3/ths/Pp…	252		Male.marker.genes	GO:0031226	intrinsic component of plasma membrane	210/2364	479/11938	1.87023e-34	4.73168e-32	2.46083e-32	fwe/nrv3/Cad87A/kcc/Nckx30C/DIP-beta/Ca-alpha1T/Tsp66E/pasi2/AstC-R1/GABA-B-R3/CG42594/nAChRbeta2/pasi1/put/AstC-R2/nAChRalpha2/mGluR/nrv2/TyrR/dpr3/Atpalpha/CadN/Cals/Nrx-1/PlexA/tutl/Dscam2/wls/Nrg/Teh2/Rdl/Tsp42Ee/fra/dpr14/FMRFaR/Ten-m/aph-1/para/CG13887/beat-Ic/Nlg4/Nmdar2/CadN2/ed/dpr19/CG1090/dpr13/DIP-gamma/dpr20/Ndae1/DopEcR/GABA-B-R2/mAChR-A/robo1/drl/GABA-B-R1/nAChRalpha3/Nrk/Tsp97E/Oa…	210
Male.marker.genes	GO:0008324	cation transmembrane transporter activity	127/2323	355/12127	6.28593e-14	1.24052e-11	8.35558e-12	ATPsynbeta/COX5A/COX4/VGAT/fwe/nrv3/CG10804/blw/ATPsynCF6/cype/Calx/sun/kcc/COX5B/Vha26/SPoCk/ATPsynB/COX8/Nckx30C/COX7C/Ca-alpha1T/CG42594/nAChRbeta2/nAChRalpha2/VhaAC45/nrv2/PMP34/Atpalpha/PMCA/CG4587/Vha16-1/Nhe3/Vha68-1/VhaPPA1-1/Ca-alpha1D/CG15270/para/Nmdar2/CG43066/CG1090/Ndae1/nAChRalpha3/CG1688/SERCA/GluRIB/GluRIA/COX7A/Shawl/CG42340/CG15168/CG31030/CG10470/Task7/Ih/nAChRalpha6/nAChRalph…	127		Male.marker.genes	GO:0032990	cell part morphogenesis	255/2449	471/12275	2.18331e-63	2.02061e-60	9.99361e-61	prel/path/dsx/Wnt4/Mp/tsr/fend/beat-Vc/hdc/ct/Trim9/ap/ham/14-3-3epsilon/Ptp99A/trn/Fas3/p120ctn/put/Lar/Hsc70-4/beat-VI/Nrt/caps/CkIIalpha/Mmp2/Cont/Snoo/BuGZ/SelR/CSN5/CadN/Appl/Cam/Bsg/Sdc/futsch/Ten-a/PlexA/tutl/Dscam2/pros/Nrg/fra/fax/shot/sli/Ten-m/Toll-7/beat-Ic/tok/beat-IIb/beat-Va/CadN2/Lis-1/Dg/DIP-gamma/Sema1a/Sar1/robo1/drl/Fas1/Dhc64C/Nrk/dpr11/Frl/Fas2/scro/fz2/sbb/smt3/robo3/ths/Pp…	255		Male.marker.genes	GO:0005887	integral component of plasma membrane	203/2364	465/11938	5.36223e-33	9.0443e-31	4.70371e-31	fwe/nrv3/Cad87A/kcc/Nckx30C/DIP-beta/Ca-alpha1T/Tsp66E/pasi2/AstC-R1/GABA-B-R3/CG42594/nAChRbeta2/pasi1/put/AstC-R2/nAChRalpha2/mGluR/nrv2/TyrR/dpr3/Atpalpha/CadN/Cals/Nrx-1/PlexA/tutl/Dscam2/wls/Nrg/Teh2/Rdl/Tsp42Ee/fra/dpr14/FMRFaR/Ten-m/aph-1/para/CG13887/beat-Ic/Nlg4/Nmdar2/CadN2/ed/dpr19/CG1090/dpr13/DIP-gamma/dpr20/Ndae1/DopEcR/GABA-B-R2/mAChR-A/robo1/drl/GABA-B-R1/nAChRalpha3/Nrk/Tsp97E/Oa…	203
Male.marker.genes	GO:0003735	structural constituent of ribosome	104/2323	271/12127	7.66937e-14	1.24052e-11	8.35558e-12	mRpL21/mRpL2/mRpL12/mRpS7/mRpL16/tko/mRpS10/RpS3A/RpS23/RpL19/mRpS25/mRpL22/RpL26/RpL15/RpS9/RpL36/RpL23/RpL31/RpL12/RpL41/RpS6/RpS21/RpL28/RpS20/RpL39/RpL23A/RpS7/RpL32/RpL37A/RpLP0/RpL38/RpL29/RpL35/RpL5/RpLP1/RpL27/sta/RpS26/RpL8/RpS4/RpS12/RpS27/RpS29/RpS16/RpS8/RpS25/RpS15/RpL35A/RpL13/RpL7/RpL4/RpL18/RpL30/RpL7A/RpL36A/RpL11/RpS19a/mRpL27/mRpL44/RpL24/mRpL20/mRpL24/mRpL41/mRpS24/mRpL52/mRpS…	104		Male.marker.genes	GO:0120039	plasma membrane bounded cell projection morphogenesis	251/2449	460/12275	2.80057e-63	2.02061e-60	9.99361e-61	prel/path/dsx/Wnt4/Mp/tsr/fend/beat-Vc/hdc/ct/Trim9/ap/ham/14-3-3epsilon/Ptp99A/trn/Fas3/p120ctn/put/Lar/Hsc70-4/beat-VI/Nrt/caps/CkIIalpha/Mmp2/Cont/Snoo/BuGZ/SelR/CSN5/CadN/Appl/Cam/Bsg/Sdc/futsch/Ten-a/PlexA/tutl/Dscam2/pros/Nrg/fra/fax/shot/sli/Ten-m/Toll-7/beat-Ic/tok/beat-IIb/beat-Va/CadN2/Lis-1/Dg/DIP-gamma/Sema1a/Sar1/robo1/drl/Fas1/Dhc64C/Nrk/dpr11/Frl/Fas2/scro/fz2/sbb/smt3/robo3/Pp1-87…	251		Male.marker.genes	GO:0098798	mitochondrial protein complex	139/2364	270/11938	7.15686e-32	9.05343e-30	4.70846e-30	ND-SGDH/ND-MWFE/ND-42/mRpL21/CG34132/mRpL2/mRpL12/ND-ASHI/ND-B14.5B/ND-15/CG11752/mRpS7/SdhB/mRpL16/scu/Tom7/ND-30/tko/CG8004/SdhC/Cyt-c1/ND-19/UQCR-C2/ND-B12/ND-PDSW/UQCR-C1/ATPsynF/ATPsynbeta/COX5A/COX4/UQCR-14/blw/CG6878/UQCR-Q/ATPsynCF6/cype/QIL1/sun/Neb-cGP/Tom20/COX5B/UQCR-6.4/ND-13A/CG5903/ND-B14.7/ATPsynB/COX7C/mRpS10/Nc73EF/COX7A/mRpS25/mRpL22/CG7834/ATPsynG/levy/ATPsynC/RFeSP/ATPsyndelt…	139
Male.marker.genes	GO:0022890	inorganic cation transmembrane transporter activity	122/2323	339/12127	1.22437e-13	1.58433e-11	1.06713e-11	ATPsynbeta/COX5A/COX4/VGAT/fwe/nrv3/CG10804/blw/ATPsynCF6/cype/Calx/sun/kcc/COX5B/Vha26/SPoCk/ATPsynB/COX8/Nckx30C/COX7C/Ca-alpha1T/CG42594/nAChRbeta2/nAChRalpha2/VhaAC45/nrv2/Atpalpha/PMCA/CG4587/Vha16-1/Nhe3/Vha68-1/VhaPPA1-1/Ca-alpha1D/CG15270/para/Nmdar2/CG43066/CG1090/Ndae1/nAChRalpha3/CG1688/SERCA/GluRIB/GluRIA/COX7A/Shawl/CG42340/CG15168/CG31030/CG10470/Task7/Ih/nAChRalpha6/nAChRalpha7/cac…	122		Male.marker.genes	GO:0048812	neuron projection morphogenesis	250/2449	459/12275	8.2197e-63	4.74441e-60	2.34651e-60	prel/path/dsx/Wnt4/Mp/tsr/fend/beat-Vc/hdc/ct/Trim9/ap/ham/14-3-3epsilon/Ptp99A/trn/Fas3/p120ctn/put/Lar/Hsc70-4/beat-VI/Nrt/caps/CkIIalpha/Mmp2/Cont/Snoo/BuGZ/SelR/CSN5/CadN/Appl/Cam/Bsg/Sdc/futsch/Ten-a/PlexA/tutl/Dscam2/pros/Nrg/fra/fax/shot/sli/Ten-m/Toll-7/beat-Ic/tok/beat-IIb/beat-Va/CadN2/Lis-1/Dg/DIP-gamma/Sema1a/Sar1/robo1/drl/Fas1/Dhc64C/Nrk/dpr11/Frl/Fas2/scro/fz2/sbb/smt3/robo3/Pp1-87…	250		Male.marker.genes	GO:0044391	ribosomal subunit	106/2364	180/11938	3.88927e-31	3.93594e-29	2.04698e-29	mRpL21/mRpL2/mRpL12/MCTS1/mRpS7/mRpL16/tko/mRpS10/RpS3A/RpS23/RpL19/mRpS25/mRpL22/RpL26/RpL15/RpS9/RpL36/RpL23/RpL31/RpL12/RpL41/RpS6/RpS21/RpL28/RpS20/RpL39/RpL23A/RpS7/RpL32/RpL37A/RpLP0/RpL38/RpL29/RpL35/RpL5/RpLP1/RpL27/sta/RpS26/RpL8/RpS4/RpS12/RpS27/RpS29/RpS16/RpS8/RpS25/RpS15/RpL35A/RpL13/RpL7/RpL4/RpL18/RpL30/RpL7A/RpL36A/RpL11/RpS19a/mRpL27/mRpL44/RpL24/mRpL20/mRpL24/mRpL41/mRpS24/mRpL5…	106
Male.marker.genes	GO:0005509	calcium ion binding	83/2323	200/12127	1.84235e-13	1.98666e-11	1.33813e-11	Scgalpha/Cbp53E/Scp2/Cad87A/Calx/wry/Frq2/sqh/CadN/Calr/Cals/Cam/NUCB1/Nrg/Cow/shot/sli/para/Dap160/SP2353/tok/CadN2/CG31650/Dg/mgl/Nca/Alg-2/stan/norpA/cac/crb/kug/Dgk/CG44422/tld/Syt12/eys/CG31475/CanB2/CG12817/CG5890/Eip63F-1/LRP1/AnxB11/Sytbeta/CG17272/CanB/Lrp4/Ret/Plc21C/LpR1/Cadps/CG11638/scf/CG32373/alpha-Man-Ia/elm/LpR2/unc-13/Syt1/Syt7/Dl/CG7646/rdgC/Swip-1/CG17765/Frq1/Cnx99A/CG31999/M…	83		Male.marker.genes	GO:0048667	cell morphogenesis involved in neuron differentiation	247/2449	456/12275	2.05114e-61	9.86596e-59	4.87954e-59	prel/path/dsx/Wnt4/Mp/tsr/fend/beat-Vc/hdc/ct/Trim9/ap/ham/14-3-3epsilon/Ptp99A/trn/Fas3/p120ctn/put/Lar/Hsc70-4/beat-VI/Nrt/caps/CkIIalpha/Mmp2/Cont/Snoo/BuGZ/SelR/CSN5/CadN/Cam/Bsg/Sdc/futsch/Ten-a/PlexA/tutl/Dscam2/pros/Nrg/cnn/fra/fax/shot/sli/Ten-m/Toll-7/beat-Ic/tok/beat-IIb/beat-Va/CadN2/Lis-1/Dg/DIP-gamma/Sema1a/Sar1/robo1/drl/Fas1/Dhc64C/Nrk/dpr11/Frl/Fas2/scro/fz2/sbb/smt3/robo3/Pp1-87B…	247		Male.marker.genes	GO:0044456	synapse part	115/2364	209/11938	5.99683e-30	5.05733e-28	2.63019e-28	Hasp/Tob/Cbp53E/VGAT/fwe/cpx/Gdi/Rab3/Syp/sky/nAChRbeta2/nAChRalpha2/Frq2/RabX4/hig/Rab11/CaMKII/Cals/Bsg/Nrx-1/Ten-a/wls/nSyb/drpr/Ten-m/Dap160/Rbp/Tomosyn/nAChRalpha3/unc-13-4A/Fas2/Nrx-IV/Spn/eIF4E1/veli/X11Lbeta/Syx1A/nAChRalpha6/nAChRalpha7/Nlg2/Prosap/inaE/cac/kek6/Syx6/Fife/Exn/Rim/CanB2/Alk/jeb/nAChRalpha1/orb2/Neto/ena/Sytbeta/Magi/VGlut/Syt4/CanB/Lrp4/Ank2/Atg8a/nAChRalpha5/pum/brp/mnb/…	115
Male.marker.genes	GO:0003729	mRNA binding	82/2323	201/12127	7.79186e-13	7.2019e-11	4.85087e-11	DENR/mRpS7/Imp/Syp/bru1/Su(var)205/RnpS1/SF2/tsu/Pabp2/rump/fne/shep/nonA/eIF4G1/rin/eIF4H1/eIF4G2/Unr/Rbp9/CG4612/B52/Rm62/SC35/x16/cpo/CG14414/Rbfox1/Sf3b6/D/CG34354/orb/bol/msi/HnRNP-K/Hrb98DE/orb2/Hrb27C/brat/RpL35/ssx/bru3/heph/sm/RpS26/pum/sqd/eIF3g1/Rbp1/CG9705/ytr/CG42458/CG2931/glo/Pcf11/Saf-B/P32/Caper/Rbp1-like/eRF1/Rb97D/Sxl/hfp/pAbp/elav/mbf1/Ref1/Pur-alpha/Rnp4F/cyp33/barc/eIF3b/vig…	82		Male.marker.genes	GO:0061564	axon development	205/2449	360/12275	1.10894e-55	4.57202e-53	2.26124e-53	Rtca/Imp/dsx/Wnt4/Mp/tsr/fend/beat-Vc/hdc/Trim9/ap/14-3-3epsilon/Ptp99A/trn/Fas3/put/Lar/Hsc70-4/beat-VI/Nrt/caps/CkIIalpha/Mmp2/Cont/SelR/CSN5/CadN/Cam/Bsg/Sdc/futsch/Ten-a/PlexA/tutl/Dscam2/pros/Nrg/Con/fra/fax/shot/sli/Ten-m/Toll-7/beat-Ic/tok/beat-IIb/beat-Va/CadN2/Lis-1/Dg/DIP-gamma/Sema1a/robo1/drl/Fas1/Nrk/dpr11/Frl/Fas2/fz2/sbb/smt3/robo3/Pp1-87B/Oli/dlp/stan/Arpc1/Rheb/SoxN/side/ko/msn/d…	205		Male.marker.genes	GO:0043005	neuron projection	186/2364	429/11938	8.45062e-30	6.10859e-28	3.17693e-28	Rpn8/path/Cbp53E/Imp/VGAT/cpx/kcc/hdc/Trim9/Ptp99A/klg/sky/nAChRbeta2/Lar/pyd/dpr10/nAChRalpha2/nrv2/dpr3/Mmp2/Cont/Rab11/dpr15/CadN/CaMKII/Bsg/Rtnl1/Nrx-1/futsch/tutl/Dscam2/nSyb/Con/Rdl/fra/CG7166/dpr14/RIC-3/shot/drpr/amon/Lis-1/dpr19/dpr13/DIP-gamma/dpr20/mAChR-A/robo1/drl/nAChRalpha3/Dhc64C/dpr11/dpr9/Fas2/stai/5-HT1A/Spn/ringer/dpr8/Shawl/eIF4E1/dpr5/X11Lbeta/robo3/dpr18/dpr17/GluClalpha/Sy…	186
Male.marker.genes	GO:0000981	DNA-binding transcription factor activity, RNA polymerase II-specific	103/2323	279/12127	1.72446e-12	1.39466e-10	9.39379e-11	hth/abd-A/tsh/Antp/dsx/Blimp-1/Lim1/bi/toy/ap/luna/Hr4/Eip75B/pros/Adf1/CG43689/dmrt99B/SoxN/pan/ftz-f1/Sox21b/D/CG9932/CG12605/Eip74EF/Hr3/chn/cic/Mad/EcR/Hr38/kay/shn/CG43347/Xbp1/caup/ara/fd59A/TfAP-2/tup/Mef2/vvl/sima/onecut/CG32532/Rx/grn/mid/Pdp1/Drgx/hb/fd102C/Optix/sd/Stat92E/CG32767/da/foxo/B-H1/B-H2/sim/ey/Dif/NfI/CG12769/Lim3/PHDP/exd/rn/cbt/Pur-alpha/oc/Gsc/Ets65A/zfh1/mirr/aop/sv/fkh…	103		Male.marker.genes	GO:0097485	neuron projection guidance	177/2449	289/12275	1.56434e-54	5.64337e-52	2.79112e-52	dsx/Wnt4/Mp/fend/beat-Vc/ct/Trim9/ap/14-3-3epsilon/Ptp99A/trn/Fas3/put/Lar/Hsc70-4/beat-VI/Nrt/caps/CkIIalpha/Mmp2/Cont/SelR/CadN/Cam/Bsg/Sdc/Ten-a/PlexA/tutl/Dscam2/pros/Nrg/fra/shot/sli/Ten-m/Toll-7/beat-Ic/tok/beat-IIb/beat-Va/CadN2/Lis-1/Dg/DIP-gamma/Sema1a/robo1/drl/Fas1/Nrk/dpr11/Fas2/fz2/sbb/robo3/Pp1-87B/Oli/dlp/stan/Rheb/SoxN/side/Toll-6/ko/msn/beat-Ib/CG44153/kuz/lola/Src64B/Ephrin/Dad/…	177		Male.marker.genes	GO:0030424	axon	117/2364	231/11938	3.66102e-26	2.31559e-24	1.20428e-24	path/Cbp53E/Imp/cpx/kcc/hdc/Trim9/Ptp99A/klg/sky/Lar/pyd/nrv2/Cont/Rab11/CadN/CaMKII/Bsg/Rtnl1/Nrx-1/futsch/tutl/Dscam2/nSyb/Con/Rdl/fra/CG7166/shot/drpr/Lis-1/robo1/drl/Dhc64C/Fas2/ringer/Shawl/robo3/Syx1A/Prosap/CG44153/kek6/erm/rad/Ptp10D/Dscam3/Dscam1/Alk/gogo/jeb/plum/orb2/ena/DAAM/Magi/Syt4/Lrp4/Ank2/sNPF/Atg8a/tau/Ret/NetB/pum/Dscam4/mnb/Shaw/Apc/Abl/gukh/pod1/Snap25/CLIP-190/chb/robo2/Rop…	117
Male.marker.genes	GO:0005102	signaling receptor binding	94/2323	257/12127	2.97914e-11	2.14167e-09	1.44253e-09	Wnt4/sun/Neb-cGP/wry/Pvf3/plx/Akap200/Nrx-1/Actbeta/miple1/CNPYb/RIC-3/sli/Nlg4/ed/Sema1a/Galphao/Spn/Galphas/ths/Toll-6/CG32683/Nlg2/Prosap/crb/numb/tai/Src64B/Ephrin/Dad/Socs36E/AstC/Tk/DOR/Nlg3/Ccn/kek1/Gprk1/otk/Hr38/Galphaq/wake/vn/Nplp1/poly/sNPF/Atg8a/rhea/Dh31/Ret/Apoltp/spri/cv-2/Src42A/PVRAP/Dab/bnl/mav/E(bx)/CASK/dlg1/RhoGAPp190/Stat92E/csw/Nedd4/Utx/spz5/arm/Dl/comm/scrib/pyr/Traf6/Gp…	94		Male.marker.genes	GO:0006935	chemotaxis	180/2449	298/12275	3.66278e-54	1.17453e-51	5.80904e-52	dsx/Wnt4/Mp/fend/beat-Vc/ct/Trim9/ap/14-3-3epsilon/Ptp99A/trn/Fas3/put/Lar/Hsc70-4/beat-VI/Nrt/caps/CkIIalpha/Mmp2/Cont/SelR/CadN/Cam/Bsg/Sdc/Ten-a/PlexA/tutl/Dscam2/pros/Nrg/Con/fra/shot/sli/Ten-m/Toll-7/beat-Ic/tok/beat-IIb/beat-Va/CadN2/Lis-1/Dg/DIP-gamma/Sema1a/robo1/drl/Fas1/Nrk/dpr11/Tl/Fas2/fz2/sbb/robo3/Pp1-87B/Oli/dlp/stan/Rheb/SoxN/side/Toll-6/ko/msn/beat-Ib/CG44153/kuz/lola/Src64B/Ephr…	180		Male.marker.genes	GO:0098797	plasma membrane protein complex	94/2364	173/11938	3.84577e-24	2.16218e-22	1.12449e-22	Scgbeta/Scgalpha/nrv3/Vha26/Ca-alpha1T/Ggamma30A/GABA-B-R3/nAChRbeta2/put/nAChRalpha2/VhaAC45/mGluR/nrv2/Atpalpha/CG4587/Vha16-1/aPKC/VhaPPA1-1/Chc/Ca-alpha1D/aph-1/para/Nmdar2/CadN2/Gbeta13F/Dg/GABA-B-R2/GABA-B-R1/Galphao/nAChRalpha3/GluRIB/GluRIA/sdt/Shawl/Syn1/veli/Flo1/Galphas/CG31030/wit/nAChRalpha6/nAChRalpha7/Dys/Prosap/norpA/cac/crb/eag/NaCP60E/Hk/nAChRalpha1/Neto/Galphaq/nAChRalpha5/Shaw…	94
Male.marker.genes	GO:0060089	molecular transducer activity	140/2323	438/12127	5.25128e-11	3.39758e-09	2.28845e-09	CG13579/Ptp99A/klg/AstC-R1/GABA-B-R3/nAChRbeta2/put/Lar/Hr4/AstC-R2/nAChRalpha2/Eip78C/Eip75B/mGluR/TyrR/shakB/PlexA/Rdl/fra/CG7166/FMRFaR/Toll-7/Nlg4/Nmdar2/DopEcR/GABA-B-R2/mAChR-A/drl/GABA-B-R1/nAChRalpha3/Nrk/GluRIB/Tl/GluRIA/5-HT1A/fz2/Oct-TyrR/pHCl-1/stan/wit/GluClalpha/AstA-R1/Toll-6/nAChRalpha6/CG12290/nAChRalpha7/Pka-C1/Octbeta2R/CG43795/Dop2R/Nlg2/alc/CG44153/TrissinR/Eip63E/AdipoR/arr/…	140		Male.marker.genes	GO:0007411	axon guidance	173/2449	280/12275	4.24265e-54	1.22443e-51	6.05583e-52	dsx/Wnt4/Mp/fend/beat-Vc/Trim9/ap/14-3-3epsilon/Ptp99A/trn/Fas3/put/Lar/Hsc70-4/beat-VI/Nrt/caps/CkIIalpha/Mmp2/Cont/SelR/CadN/Cam/Bsg/Sdc/Ten-a/PlexA/tutl/Dscam2/pros/Nrg/fra/shot/sli/Ten-m/Toll-7/beat-Ic/tok/beat-IIb/beat-Va/CadN2/Lis-1/Dg/DIP-gamma/Sema1a/robo1/drl/Fas1/Nrk/dpr11/Fas2/fz2/sbb/robo3/Pp1-87B/Oli/dlp/stan/Rheb/SoxN/side/ko/msn/beat-Ib/CG44153/kuz/lola/Src64B/Ephrin/Dad/beat-IIa/D…	173		Male.marker.genes	GO:0044429	mitochondrial part	185/2364	480/11938	2.545e-22	1.28777e-20	6.69737e-21	ND-SGDH/Idh3b/ND-MWFE/ND-42/prel/mRpL21/CG34132/mRpL2/mRpL12/IscU/ND-ASHI/ND-B14.5B/ND-15/Cchl/CG11752/kdn/mRpS7/SdhB/mRpL16/scu/Tom7/ND-30/tko/CG8004/SdhC/Cyt-c1/ND-19/UQCR-C2/ND-B12/ND-PDSW/UQCR-C1/ATPsynF/ATPsynbeta/CG11267/COX5A/COX4/porin/UQCR-14/Cyt-c-p/sesB/P5CDh1/slgA/blw/CG6878/UQCR-Q/Gabat/ATPsynCF6/cype/QIL1/sun/Neb-cGP/Tom20/COX5B/UQCR-6.4/ND-13A/CG5903/ND-B14.7/ATPsynB/COX7C/Hsc70-4/…	185
Male.marker.genes	GO:0038023	signaling receptor activity	133/2323	412/12127	7.63912e-11	4.49319e-09	3.02641e-09	CG13579/Ptp99A/klg/AstC-R1/GABA-B-R3/nAChRbeta2/put/Lar/Hr4/AstC-R2/nAChRalpha2/Eip78C/Eip75B/mGluR/TyrR/shakB/PlexA/Rdl/fra/CG7166/FMRFaR/Toll-7/Nlg4/Nmdar2/DopEcR/GABA-B-R2/mAChR-A/drl/GABA-B-R1/nAChRalpha3/Nrk/GluRIB/Tl/GluRIA/5-HT1A/fz2/Oct-TyrR/pHCl-1/stan/wit/GluClalpha/AstA-R1/Toll-6/nAChRalpha6/CG12290/nAChRalpha7/Octbeta2R/CG43795/Dop2R/Nlg2/CG44153/TrissinR/AdipoR/arr/kek6/ftz-f1/Gfrl/T…	133		Male.marker.genes	GO:0007409	axonogenesis	198/2449	347/12275	5.76653e-54	1.51293e-51	7.4827e-52	dsx/Wnt4/Mp/tsr/fend/beat-Vc/hdc/Trim9/ap/14-3-3epsilon/Ptp99A/trn/Fas3/put/Lar/Hsc70-4/beat-VI/Nrt/caps/CkIIalpha/Mmp2/Cont/SelR/CSN5/CadN/Cam/Bsg/Sdc/futsch/Ten-a/PlexA/tutl/Dscam2/pros/Nrg/fra/fax/shot/sli/Ten-m/Toll-7/beat-Ic/tok/beat-IIb/beat-Va/CadN2/Lis-1/Dg/DIP-gamma/Sema1a/robo1/drl/Fas1/Nrk/dpr11/Frl/Fas2/fz2/sbb/smt3/robo3/Pp1-87B/Oli/dlp/stan/Arpc1/Rheb/SoxN/side/ko/msn/dnc/beat-Ib/Mb…	198		Male.marker.genes	GO:0098800	inner mitochondrial membrane protein complex	83/2364	150/11938	3.73116e-22	1.71633e-20	8.92621e-21	ND-SGDH/ND-MWFE/ND-42/ND-ASHI/ND-B14.5B/ND-15/CG11752/SdhB/ND-30/SdhC/Cyt-c1/ND-19/UQCR-C2/ND-B12/ND-PDSW/UQCR-C1/ATPsynF/ATPsynbeta/COX5A/COX4/UQCR-14/blw/CG6878/UQCR-Q/ATPsynCF6/cype/QIL1/sun/Neb-cGP/COX5B/UQCR-6.4/ND-13A/CG5903/ND-B14.7/ATPsynB/COX7C/COX7A/ATPsynG/levy/ATPsynC/RFeSP/ATPsyndelta/ND-MLRQ/ATPsyngamma/COX6B/ND-39/ATPsynD/ND-B15/EMRE/ATPsynO/ND-B17.2/ND-18/ND-B14/ND-23/SdhA/ND-75/N…	83
Male.marker.genes	GO:0099528	G protein-coupled neurotransmitter receptor activity	18/2323	21/12127	8.37616e-11	4.51614e-09	3.04187e-09	GABA-B-R3/TyrR/GABA-B-R2/mAChR-A/GABA-B-R1/5-HT1A/Oct-TyrR/Octbeta2R/Octbeta3R/Octbeta1R/5-HT7/Oamb/Dop1R1/mAChR-B/5-HT2A/5-HT1B/Dop1R2/5-HT2B	18		Male.marker.genes	GO:0042330	taxis	206/2449	370/12275	9.71574e-54	2.33664e-51	1.15566e-51	dsx/CG6330/Wnt4/slgA/Mp/fend/beat-Vc/ct/Trim9/ap/14-3-3epsilon/Ptp99A/rdgA/trn/Fas3/put/Lar/Hsc70-4/beat-VI/Nrt/M6/caps/CkIIalpha/Mmp2/Cont/SelR/CadN/Cam/Bsg/Sdc/Ten-a/PlexA/tutl/Dscam2/pros/Nrg/shep/Con/fra/nonA/shot/sli/Ten-m/Toll-7/beat-Ic/tok/beat-IIb/beat-Va/CadN2/Lis-1/Dg/DIP-gamma/Sema1a/robo1/drl/Gycalpha99B/Fas1/Nrk/dpr11/Tl/Fas2/CG34353/fz2/sbb/robo3/Pp1-87B/Oli/dlp/stan/Rheb/lov/SoxN/w…	206		Male.marker.genes	GO:0044455	mitochondrial membrane part	96/2364	193/11938	6.01347e-21	2.53568e-19	1.31874e-19	ND-SGDH/ND-MWFE/ND-42/prel/ND-ASHI/ND-B14.5B/ND-15/CG11752/SdhB/Tom7/ND-30/CG8004/SdhC/Cyt-c1/ND-19/UQCR-C2/ND-B12/ND-PDSW/UQCR-C1/ATPsynF/ATPsynbeta/COX5A/COX4/UQCR-14/blw/CG6878/UQCR-Q/ATPsynCF6/cype/QIL1/sun/Neb-cGP/Tom20/COX5B/UQCR-6.4/ND-13A/CG5903/ND-B14.7/ATPsynB/COX7C/COX7A/ATPsynG/levy/ATPsynC/RFeSP/ATPsyndelta/ND-MLRQ/Mpcp2/ATPsyngamma/COX6B/ND-39/ATPsynD/ND-B15/EMRE/ATPsynO/ND-B17.2/ND…	96
Male.marker.genes	GO:0001653	peptide receptor activity	31/2323	52/12127	1.31059e-10	6.52268e-09	4.39338e-09	AstC-R1/AstC-R2/FMRFaR/AstA-R1/TrissinR/TkR86C/CCKLR-17D3/Dh31-R/CG13995/CCAP-R/CG33639/Dh44-R2/sNPF-R/CG31183/SPR/Dh44-R1/CG34357/CNMaR/Lkr/SIFaR/NPFR/rk/Lgr4/CG10738/CG13229/CG32547/Pdfr/TkR99D/CCHa1-R/RYa-R/CrzR	31		Male.marker.genes	GO:0007267	cell-cell signaling	241/2449	479/12275	4.95317e-52	1.0996e-49	5.43846e-50	gammaSnap1/Pgk/Cbp53E/tsh/VGAT/sesB/Wnt4/cpx/nwk/Sap47/Gdi/nemy/Rab3/Sod1/Syp/CG9650/sky/nAChRbeta2/Hsc70-4/nAChRalpha2/mGluR/Frq2/CkIIalpha/Mmp2/Atpalpha/CaMKII/Cals/Nrx-1/Ten-a/wls/nSyb/Rdl/bai/CG6329/Cow/RIC-3/eca/shot/Ten-m/Chc/Bili/nkd/p24-1/CHOp24/Nlg4/Rbp/Glut1/Dg/Tomosyn/GABA-B-R2/mAChR-A/drl/Galphao/nAChRalpha3/unc-13-4A/SERCA/Fas2/Nrx-IV/cmpy/5-HT1A/fz2/mam/veli/X11Lbeta/Galphas/Diap1/P…	241		Male.marker.genes	GO:0098793	presynapse	82/2364	153/11938	1.03657e-20	4.03465e-19	2.09832e-19	Cbp53E/VGAT/fwe/cpx/Gdi/Rab3/sky/Frq2/RabX4/Rab11/CaMKII/Bsg/Nrx-1/Ten-a/wls/nSyb/Dap160/Rbp/Tomosyn/unc-13-4A/Fas2/Nrx-IV/Syx1A/Prosap/cac/kek6/Syx6/Fife/Exn/Rim/CanB2/Alk/jeb/orb2/ena/Sytbeta/Magi/VGlut/Syt4/CanB/Lrp4/Ank2/Atg8a/pum/brp/mnb/Gycbeta100B/gukh/Cadps/Snap25/Rop/RhoGAP100F/Fak/Syn/Rgk1/VAChT/Cirl/unc-13/CASK/dlg1/Syt1/Mical/stj/Syt7/prt/Dop1R2/Rab27/metro/Mob4/EndoA/Syngr/Eps-15/Rph…	82
Male.marker.genes	GO:0030594	neurotransmitter receptor activity	37/2323	70/12127	2.71375e-10	1.25414e-08	8.4473e-09	GABA-B-R3/nAChRbeta2/nAChRalpha2/TyrR/Rdl/Nmdar2/DopEcR/GABA-B-R2/mAChR-A/GABA-B-R1/nAChRalpha3/GluRIB/GluRIA/5-HT1A/Oct-TyrR/nAChRalpha6/nAChRalpha7/Octbeta2R/Dop2R/Octbeta3R/nAChRalpha1/Octbeta1R/5-HT7/nAChRalpha5/Oamb/Dop1R1/mAChR-B/5-HT2A/5-HT1B/nAChRbeta1/Lcch3/CG11155/Dop1R2/5-HT2B/nAChRalpha4/Nmdar1/Grd	37		Male.marker.genes	GO:0050808	synapse organization	169/2449	294/12275	1.12387e-46	2.31679e-44	1.14584e-44	Imp/sesB/Gad1/cpx/nwk/Rab3/Sod1/DIP-beta/Syp/klg/p120ctn/put/Lar/dpr10/mGluR/Frq2/caps/dpr3/Rab11/dpr15/Atpalpha/CaMKII/Appl/Cals/Nrx-1/Sdc/futsch/Ten-a/pros/Nrg/CG7166/dpr14/aPKC/drpr/Ten-m/Nlg4/Rbp/dpr19/dpr13/DIP-gamma/dpr20/Sema1a/Sar1/drl/Galphao/dpr11/Tl/dpr9/Fas2/Nrx-IV/Nos/stai/cmpy/fz2/Spn/smt3/dpr21/dpr8/Syn1/dpr5/veli/Galphas/dpr18/Smn/dlp/stan/wit/Rheb/Adf1/DIP-theta/DIP-eta/dpr17/Oct…	169		Male.marker.genes	GO:0098803	respiratory chain complex	57/2364	88/11938	3.71448e-20	1.34252e-18	6.98211e-19	ND-SGDH/ND-MWFE/ND-42/ND-ASHI/ND-B14.5B/ND-15/CG11752/SdhB/ND-30/SdhC/Cyt-c1/ND-19/UQCR-C2/ND-B12/ND-PDSW/UQCR-C1/COX5A/COX4/UQCR-14/UQCR-Q/cype/COX5B/UQCR-6.4/ND-13A/ND-B14.7/COX8/COX7C/COX7A/levy/RFeSP/ND-MLRQ/COX6B/ND-39/ND-B15/ND-B17.2/ND-18/ND-B14/ND-23/SdhA/ND-75/ND-B18/ND-51/ox/ND-24/ND-ACP/ND-20/ND-B16.6/SdhD/ND-13B/ND-49/ND-B22/ND-B14.5A/ND-AGGG/Sirup/NP15.6/UQCR-11/CG40472	57
Male.marker.genes	GO:0001012	RNA polymerase II regulatory region DNA binding	93/2323	263/12127	3.10587e-10	1.33967e-08	9.02338e-09	abd-A/Ubx/Abd-B/Antp/dsx/Blimp-1/zfh2/salr/Lim1/bi/ct/toy/ap/Hr4/Eip75B/scro/CG43689/disco/dmrt99B/br/pan/CG9932/CG12605/Smr/Hr3/cic/Mad/EcR/Hr38/kay/NK7.1/Atf3/Trf2/NFAT/Xbp1/TfAP-2/tup/Mef2/vvl/CG10543/drm/odd/CG32532/Rx/grn/mid/Pdp1/Drgx/hb/sd/Stat92E/CG32767/da/Utx/foxo/B-H1/B-H2/sim/ey/Hr51/Dif/CG12769/Lim3/PHDP/Ptx1/rn/Pur-alpha/Gsc/dve/zfh1/aop/pho/fkh/HLH4C/HGTX/Awh/MESR3/CrebA/CG12071/My…	93		Male.marker.genes	GO:0099536	synaptic signaling	162/2449	303/12275	2.83789e-39	5.46011e-37	2.70048e-37	gammaSnap1/Pgk/Cbp53E/VGAT/sesB/cpx/nwk/Sap47/Gdi/nemy/Rab3/Sod1/Syp/sky/nAChRbeta2/Hsc70-4/nAChRalpha2/mGluR/Frq2/Atpalpha/CaMKII/Cals/Nrx-1/Ten-a/nSyb/Rdl/CG6329/RIC-3/Ten-m/Chc/Nlg4/Rbp/Dg/Tomosyn/GABA-B-R2/mAChR-A/nAChRalpha3/unc-13-4A/SERCA/Fas2/Nrx-IV/5-HT1A/veli/X11Lbeta/Galphas/Smn/Manf/wit/cpo/GluClalpha/Ih/Syx1A/nAChRalpha6/qvr/dnc/nAChRalpha7/Pka-C1/Dys/Nlg2/Prosap/inaE/cac/Src64B/kek6…	162		Male.marker.genes	GO:0070469	respiratory chain	57/2364	89/11938	8.35931e-20	2.81988e-18	1.46655e-18	ND-SGDH/ND-MWFE/ND-42/ND-ASHI/ND-B14.5B/ND-15/CG11752/SdhB/ND-30/SdhC/Cyt-c1/ND-19/UQCR-C2/ND-B12/ND-PDSW/UQCR-C1/COX5A/COX4/UQCR-14/UQCR-Q/cype/COX5B/UQCR-6.4/ND-13A/ND-B14.7/COX8/COX7C/COX7A/levy/RFeSP/ND-MLRQ/COX6B/ND-39/ND-B15/ND-B17.2/ND-18/ND-B14/ND-23/SdhA/ND-75/ND-B18/ND-51/ox/ND-24/ND-ACP/ND-20/ND-B16.6/SdhD/ND-13B/ND-49/ND-B22/ND-B14.5A/ND-AGGG/Sirup/NP15.6/UQCR-11/CG40472	57
Male.marker.genes	GO:0000977	RNA polymerase II regulatory region sequence-specific DNA binding	91/2323	256/12127	3.52761e-10	1.42648e-08	9.60809e-09	abd-A/Ubx/Abd-B/Antp/dsx/Blimp-1/zfh2/salr/Lim1/bi/ct/toy/ap/Hr4/Eip75B/scro/CG43689/disco/dmrt99B/br/pan/CG9932/CG12605/Hr3/cic/Mad/EcR/Hr38/kay/NK7.1/Atf3/Trf2/NFAT/Xbp1/TfAP-2/tup/Mef2/vvl/CG10543/drm/odd/CG32532/Rx/grn/mid/Pdp1/Drgx/hb/sd/Stat92E/CG32767/da/Utx/foxo/B-H1/B-H2/sim/ey/Hr51/Dif/CG12769/Lim3/PHDP/Ptx1/rn/Pur-alpha/Gsc/dve/zfh1/aop/pho/fkh/HLH4C/HGTX/Awh/MESR3/CrebA/CG12071/Myc/Hr…	91		Male.marker.genes	GO:0099537	trans-synaptic signaling	161/2449	302/12275	7.95327e-39	1.43457e-36	7.09516e-37	gammaSnap1/Pgk/Cbp53E/VGAT/sesB/cpx/nwk/Sap47/Gdi/nemy/Rab3/Sod1/Syp/sky/nAChRbeta2/Hsc70-4/nAChRalpha2/mGluR/Frq2/Atpalpha/CaMKII/Cals/Nrx-1/Ten-a/nSyb/Rdl/CG6329/RIC-3/Ten-m/Chc/Nlg4/Rbp/Dg/Tomosyn/GABA-B-R2/mAChR-A/nAChRalpha3/unc-13-4A/SERCA/Fas2/Nrx-IV/5-HT1A/veli/X11Lbeta/Galphas/Smn/Manf/wit/cpo/GluClalpha/Ih/Syx1A/nAChRalpha6/qvr/dnc/nAChRalpha7/Pka-C1/Dys/Nlg2/Prosap/inaE/cac/Src64B/kek6…	161		Male.marker.genes	GO:0005746	mitochondrial respiratory chain	56/2364	88/11938	2.75625e-19	8.71664e-18	4.53331e-18	ND-SGDH/ND-MWFE/ND-42/ND-ASHI/ND-B14.5B/ND-15/CG11752/SdhB/ND-30/SdhC/Cyt-c1/ND-19/UQCR-C2/ND-B12/ND-PDSW/UQCR-C1/COX5A/COX4/UQCR-14/UQCR-Q/cype/COX5B/UQCR-6.4/ND-13A/ND-B14.7/COX7C/COX7A/levy/RFeSP/ND-MLRQ/COX6B/ND-39/ND-B15/ND-B17.2/ND-18/ND-B14/ND-23/SdhA/ND-75/ND-B18/ND-51/ox/ND-24/ND-ACP/ND-20/ND-B16.6/SdhD/ND-13B/ND-49/ND-B22/ND-B14.5A/ND-AGGG/Sirup/NP15.6/UQCR-11/CG40472	56
Male.marker.genes	GO:0008227	G protein-coupled amine receptor activity	18/2323	22/12127	3.77746e-10	1.43766e-08	9.6834e-09	TyrR/DopEcR/mAChR-A/5-HT1A/Oct-TyrR/CG12290/Octbeta2R/Dop2R/Octbeta3R/Octbeta1R/5-HT7/Oamb/Dop1R1/mAChR-B/5-HT2A/5-HT1B/Dop1R2/5-HT2B	18		Male.marker.genes	GO:0040007	growth	207/2449	441/12275	8.98598e-39	1.5255e-36	7.54489e-37	mRpL12/path/Torsin/Imp/Ubx/sesB/fwe/cpx/nwk/Neb-cGP/chrb/hdc/bi/Syp/14-3-3epsilon/rgn/Lar/Hr4/Sep2/Rab11/PIP4K/sqh/Atpalpha/CadN/CaMKII/Nrx-1/Sdc/futsch/Ten-a/Actbeta/Nrg/shot/drpr/Ten-m/Chc/rin/poe/CadN2/Dg/Sema1a/Galphao/Tl/Frl/Fas2/Nos/stai/cmpy/fz2/sbb/Syn1/eIF4E1/veli/dlp/stan/wit/Rheb/disco-r/Toll-6/dnc/Pka-C1/Octbeta2R/Nlg2/Prosap/Mbs/cac/crb/pan/kuz/eag/RASSF8/Eip63E/kug/tai/CG9328/Src64B…	207		Male.marker.genes	GO:0015935	small ribosomal subunit	49/2364	77/11938	4.83124e-17	1.43801e-15	7.4787e-16	mRpL12/MCTS1/mRpS7/tko/mRpS10/RpS3A/RpS23/mRpS25/RpS9/RpS6/RpS21/RpS20/RpS7/sta/RpS26/RpS4/RpS12/RpS27/RpS29/RpS16/RpS8/RpS25/RpS15/RpS19a/mRpS24/mRpS6/mRpS16/RpS30/mRpS17/mRpS35/mRpS26/RpS28b/LTV1/bonsai/mRpS11/mRpS28/RpS14a/mRpS34/mRpS23/Rack1/mRpS21/mRpS18A/RpS13/mRpS2/mRpS22/RpS15Aa/mRpL3/mRpS33/RpS24	49
Male.marker.genes	GO:0008528	G protein-coupled peptide receptor activity	28/2323	46/12127	5.23248e-10	1.88079e-08	1.26681e-08	AstC-R1/AstC-R2/FMRFaR/AstA-R1/TrissinR/TkR86C/CCKLR-17D3/Dh31-R/CG13995/CCAP-R/CG33639/Dh44-R2/sNPF-R/SPR/Dh44-R1/CNMaR/Lkr/SIFaR/NPFR/rk/Lgr4/CG13229/CG32547/Pdfr/TkR99D/CCHa1-R/RYa-R/CrzR	28		Male.marker.genes	GO:0007268	chemical synaptic transmission	160/2449	301/12275	2.22177e-38	3.37475e-36	1.6691e-36	gammaSnap1/Pgk/Cbp53E/VGAT/sesB/cpx/nwk/Sap47/Gdi/nemy/Rab3/Sod1/Syp/sky/nAChRbeta2/Hsc70-4/nAChRalpha2/mGluR/Frq2/Atpalpha/CaMKII/Cals/Nrx-1/Ten-a/nSyb/Rdl/CG6329/RIC-3/Ten-m/Chc/Nlg4/Rbp/Dg/Tomosyn/GABA-B-R2/mAChR-A/nAChRalpha3/unc-13-4A/SERCA/Fas2/Nrx-IV/5-HT1A/veli/X11Lbeta/Galphas/Smn/Manf/wit/cpo/GluClalpha/Ih/Syx1A/nAChRalpha6/qvr/dnc/nAChRalpha7/Pka-C1/Dys/Nlg2/Prosap/cac/Src64B/kek6/Syx6…	160		Male.marker.genes	GO:0150034	distal axon	57/2364	98/11938	5.58381e-17	1.56967e-15	8.16346e-16	Cbp53E/cpx/Trim9/sky/Rab11/Rtnl1/Nrx-1/nSyb/Con/fra/shot/Lis-1/robo1/Fas2/Syx1A/Prosap/kek6/erm/Alk/gogo/jeb/orb2/ena/DAAM/Magi/Lrp4/Ank2/Atg8a/NetB/pum/mnb/gukh/pod1/Snap25/CLIP-190/chb/Rop/trio/Fak/Syn/VAChT/kra/unc-13/CASK/dlg1/Syt1/Mical/prt/metro/Cdk5alpha/Mob4/EndoA/alphaSnap/Srpk79D/Pldn/na/Synd	57
Male.marker.genes	GO:0022843	voltage-gated cation channel activity	21/2323	29/12127	6.82675e-10	2.32469e-08	1.5658e-08	Ca-alpha1T/CG4587/Ca-alpha1D/Nmdar2/Shawl/Ih/cac/eag/NaCP60E/Hk/Shaw/Shab/Shal/SLO2/Sh/slo/KCNQ/stj/Ca-beta/Elk/Nmdar1	21		Male.marker.genes	GO:0098916	anterograde trans-synaptic signaling	160/2449	301/12275	2.22177e-38	3.37475e-36	1.6691e-36	gammaSnap1/Pgk/Cbp53E/VGAT/sesB/cpx/nwk/Sap47/Gdi/nemy/Rab3/Sod1/Syp/sky/nAChRbeta2/Hsc70-4/nAChRalpha2/mGluR/Frq2/Atpalpha/CaMKII/Cals/Nrx-1/Ten-a/nSyb/Rdl/CG6329/RIC-3/Ten-m/Chc/Nlg4/Rbp/Dg/Tomosyn/GABA-B-R2/mAChR-A/nAChRalpha3/unc-13-4A/SERCA/Fas2/Nrx-IV/5-HT1A/veli/X11Lbeta/Galphas/Smn/Manf/wit/cpo/GluClalpha/Ih/Syx1A/nAChRalpha6/qvr/dnc/nAChRalpha7/Pka-C1/Dys/Nlg2/Prosap/cac/Src64B/kek6/Syx6…	160		Male.marker.genes	GO:0033267	axon part	58/2364	103/11938	2.35423e-16	6.26969e-15	3.26071e-15	Cbp53E/cpx/Trim9/sky/Rab11/Rtnl1/Nrx-1/nSyb/Con/fra/shot/Lis-1/robo1/Dhc64C/Fas2/Syx1A/Prosap/kek6/erm/Alk/gogo/jeb/orb2/ena/DAAM/Magi/Lrp4/Ank2/Atg8a/NetB/pum/mnb/gukh/pod1/Snap25/CLIP-190/chb/Rop/trio/Fak/Syn/VAChT/kra/unc-13/CASK/dlg1/Syt1/Mical/prt/metro/Cdk5alpha/Mob4/EndoA/alphaSnap/Srpk79D/Pldn/na/Synd	58
Male.marker.genes	GO:0008188	neuropeptide receptor activity	27/2323	44/12127	8.24664e-10	2.66779e-08	1.7969e-08	AstC-R1/AstC-R2/FMRFaR/AstA-R1/TrissinR/TkR86C/CCKLR-17D3/Dh31-R/CG13995/CCAP-R/CG33639/Dh44-R2/sNPF-R/Dh44-R1/CNMaR/Lkr/SIFaR/NPFR/rk/Lgr4/CG13229/CG32547/Pdfr/TkR99D/CCHa1-R/RYa-R/CrzR	27		Male.marker.genes	GO:0008038	neuron recognition	82/2449	114/12275	2.92601e-33	4.22224e-31	2.08825e-31	CG5758/dsx/Wnt4/Trim9/Ptp99A/nrm/Pvf3/Fas3/Hsc70-4/Nrt/Mmp2/Cont/hig/CadN/Bsg/Ten-a/PlexA/tutl/Dscam2/Con/fra/shot/sli/Ten-m/beat-Ic/CG8668/tok/Sema1a/robo1/drl/Fas1/Tl/Fas2/Nrx-IV/fz2/robo3/stan/galectin/Arpc1/CG44153/lola/beat-Ia/beat-IIIc/Drl-2/Dscam3/Dscam1/Fur1/dpr12/uzip/Galphaq/Rac1/Sema2b/NetB/Dscam4/Abl/fru/robo2/mew/CG32373/kra/mid/acj6/ab/PlexB/RhoGAPp190/RhoGAP93B/Nedd4/comm/Sulf1/Ptp…	82		Male.marker.genes	GO:0019866	organelle inner membrane	106/2364	254/11938	5.44463e-16	1.37749e-14	7.16398e-15	ND-SGDH/ND-MWFE/ND-42/prel/ND-ASHI/ND-B14.5B/ND-15/Cchl/CG11752/SdhB/ND-30/SdhC/Cyt-c1/ND-19/UQCR-C2/ND-B12/ND-PDSW/UQCR-C1/ATPsynF/ATPsynbeta/COX5A/COX4/UQCR-14/Cyt-c-p/sesB/blw/CG6878/UQCR-Q/ATPsynCF6/cype/QIL1/sun/Neb-cGP/COX5B/UQCR-6.4/ND-13A/CG5903/ND-B14.7/ATPsynB/COX7C/Hsc70-4/schlank/COX7A/Scox/Sirt1/GC1/ATPsynG/levy/ATPsynC/RFeSP/ATPsyndelta/ND-MLRQ/Mpcp2/ATPsyngamma/COX6B/ND-39/ATPsynD/…	106
Male.marker.genes	GO:0008134	transcription factor binding	70/2323	184/12127	1.44553e-09	4.4536e-08	2.99974e-08	hth/14-3-3zeta/bi/14-3-3epsilon/HmgD/emc/Eip75B/Taf11/tna/CG16779/pan/Gug/bin3/tai/lilli/tou/Rbfox1/ftz-f1/DOR/D/HmgZ/Dsp1/HnRNP-K/cic/Mad/EcR/Hr38/kay/Sirt1/Trf2/NFAT/TfIIA-S/Ncoa6/Crtc/shn/Hipk/Taf12/tup/yki/nej/gro/Taf4/mid/Bgb/E(bx)/Bin1/NC2beta/CtBP/sd/da/Utx/foxo/Rpt6/bip2/arm/cact/Ptx1/exd/e(y)2/dod/tim/fkh/HGTX/Mrtf/Mlf/gce/Cdk12/Pa1/E2f1/Bap111	70		Male.marker.genes	GO:0048589	developmental growth	175/2449	373/12275	8.51735e-33	1.17053e-30	5.78924e-31	path/Imp/Ubx/sesB/cpx/nwk/hdc/bi/Syp/rgn/Lar/Hr4/Sep2/Rab11/PIP4K/sqh/Atpalpha/CadN/CaMKII/Nrx-1/Sdc/futsch/Ten-a/Actbeta/Nrg/shot/Ten-m/rin/poe/CadN2/Dg/Sema1a/Galphao/Tl/Frl/Fas2/Nos/stai/fz2/sbb/Syn1/veli/dlp/stan/wit/Rheb/disco-r/Toll-6/dnc/Pka-C1/Octbeta2R/Nlg2/Prosap/Mbs/cac/crb/pan/kuz/eag/RASSF8/Eip63E/kug/tai/Src64B/arr/Dad/hid/HnRNP-K/nmo/dally/Dscam1/otk/Mad/Smox/jeb/kay/dysc/plum/brat…	175		Male.marker.genes	GO:0015934	large ribosomal subunit	59/2364	108/11938	8.73469e-16	2.10465e-14	1.09457e-14	mRpL21/mRpL2/mRpL12/mRpL16/RpL19/mRpL22/RpL26/RpL15/RpL36/RpL23/RpL31/RpL12/RpL41/RpL28/RpL39/RpL23A/RpL32/RpL37A/RpLP0/RpL38/RpL29/RpL35/RpL5/RpLP1/RpL27/RpL8/RpL35A/RpL13/RpL7/RpL4/RpL18/RpL30/RpL7A/RpL36A/RpL11/mRpL27/mRpL44/RpL24/mRpL20/mRpL24/mRpL41/mRpL52/mRpL55/mRpL30/RpL14/mRpL47/mRpL51/mRpL17/mRpL36/RpL24-like/RpL9/RpL6/RpL18A/mRpL14/mRpL28/mRpL9/mRpL48/mRpL3/RpL34a	59
Male.marker.genes	GO:0008092	cytoskeletal protein binding	99/2323	294/12127	1.77115e-09	5.20879e-08	3.5084e-08	Msp300/tsr/Hsp26/Akap200/cib/CG3226/sqh/Arpc5/CG15097/BuGZ/Cam/futsch/zip/aPKC/shot/crp/Socs16D/Ten-m/Cdep/CadN2/Lis-1/Tomosyn/Frl/stai/Spn/awd/Jupiter/ringer/pigs/CG14535/Arpc3A/Smn/Arpc1/klar/Dys/crb/CG3104/RpL23/CG17816/yrt/Klp98A/spir/DAAM/CG8726/tau/rhea/CG32264/pod1/Cortactin/CLIP-190/Moe/Vrp1/chb/CG12964/Tm1/alphaTub84D/tacc/bif/Kif3C/Kank/chic/corn/mim/unc-104/BicD/Mical/Ptpmeg/sn/Nedd4/S…	99		Male.marker.genes	GO:0009886	post-embryonic animal morphogenesis	210/2449	489/12275	2.36599e-32	3.10375e-30	1.53506e-30	Btk29A/Idh3b/path/hth/Ubx/tsh/zfh2/salr/tsr/app/Lim1/hdc/bi/Bx/ct/ap/trn/CG43658/put/emc/cib/BI-1/caps/Mmp2/sqh/Cam/ctp/Actbeta/wls/Nrg/zip/shot/drpr/svr/GEFmeso/tok/Dg/ed/MYPT-75D/Hs3st-B/Galphao/Fas2/sbb/mam/Galphas/Diap1/dlp/CSN8/disco-r/msn/br/Pka-C1/Dys/Mbs/S/pan/Gug/puc/lola/arr/Dad/Socs36E/Rbfox1/tld/Exn/Mkp3/ftz-f1/flw/D/bab1/bab2/bib/rho/hid/Drak/mbc/corto/spen/nmo/Eip74EF/dally/cg/crol/…	210		Male.marker.genes	GO:0005743	mitochondrial inner membrane	102/2364	244/11938	1.70848e-15	3.9295e-14	2.04364e-14	ND-SGDH/ND-MWFE/ND-42/prel/ND-ASHI/ND-B14.5B/ND-15/Cchl/CG11752/SdhB/ND-30/SdhC/Cyt-c1/ND-19/UQCR-C2/ND-B12/ND-PDSW/UQCR-C1/ATPsynF/ATPsynbeta/COX5A/COX4/UQCR-14/Cyt-c-p/sesB/blw/CG6878/UQCR-Q/ATPsynCF6/cype/QIL1/sun/Neb-cGP/COX5B/UQCR-6.4/ND-13A/CG5903/ND-B14.7/ATPsynB/COX7C/Hsc70-4/COX7A/Scox/GC1/ATPsynG/levy/ATPsynC/RFeSP/ATPsyndelta/ND-MLRQ/Mpcp2/ATPsyngamma/COX6B/ND-39/ATPsynD/ND-B15/EMRE/AT…	102
Male.marker.genes	GO:0003924	GTPase activity	59/2323	146/12127	1.96331e-09	5.30574e-08	3.57371e-08	eEF1alpha1/betaTub56D/Scp2/Rab3/Ggamma30A/sky/alphaTub84B/CG8641/RabX4/Sep2/Rab11/Sep4/Sar1/Galphao/Galphas/SrpRbeta/Rheb/CG42541/CenG1A/CG8500/Rgk3/Rala/CG30158/Galphaq/CG43324/CG13375/Rac1/alphaTub84D/Rgk2/Ric/Rgk1/mEFTu1/Rab6/RhoBTB/eIF5B/Rab26/Ran/Rab14/RhoGAPp190/Rab27/shi/CG14669/Rab35/Rab21/Sep1/Rab4/eIF2gamma/gammaTub23C/Drp1/pnut/Rho1/eEF2/Rab40/Gyc88E/Ras64B/Marf/Rab1/Rab7/Arf51F	59		Male.marker.genes	GO:0008037	cell recognition	83/2449	119/12275	4.52757e-32	5.68112e-30	2.80979e-30	CG5758/dsx/Wnt4/igl/Trim9/Ptp99A/nrm/Pvf3/Fas3/Hsc70-4/Nrt/Mmp2/Cont/hig/CadN/Bsg/Ten-a/PlexA/tutl/Dscam2/Con/fra/shot/sli/Ten-m/beat-Ic/CG8668/tok/Sema1a/robo1/drl/Fas1/Tl/Fas2/Nrx-IV/fz2/robo3/stan/galectin/Arpc1/CG44153/lola/beat-Ia/beat-IIIc/Drl-2/Dscam3/Dscam1/Fur1/dpr12/uzip/Galphaq/Rac1/Sema2b/NetB/Dscam4/Abl/fru/robo2/mew/CG32373/kra/mid/acj6/ab/PlexB/RhoGAPp190/RhoGAP93B/Nedd4/comm/Sulf1…	83		Male.marker.genes	GO:0031966	mitochondrial membrane	117/2364	298/11938	3.55846e-15	7.82861e-14	4.07146e-14	ND-SGDH/ND-MWFE/ND-42/prel/ND-ASHI/ND-B14.5B/ND-15/Cchl/CG11752/SdhB/Tom7/ND-30/CG8004/SdhC/Cyt-c1/ND-19/UQCR-C2/ND-B12/ND-PDSW/UQCR-C1/ATPsynF/ATPsynbeta/COX5A/COX4/porin/UQCR-14/Cyt-c-p/sesB/blw/CG6878/UQCR-Q/ATPsynCF6/cype/QIL1/sun/Neb-cGP/Tom20/COX5B/UQCR-6.4/ND-13A/CG5903/ND-B14.7/ATPsynB/COX7C/Hsc70-4/Mgstl/COX7A/Scox/CG5059/GC1/ATPsynG/levy/ATPsynC/RFeSP/ATPsyndelta/ND-MLRQ/Mpcp2/ATPsyngam…	117
Male.marker.genes	GO:0005261	cation channel activity	61/2323	153/12127	1.96813e-09	5.30574e-08	3.57371e-08	fwe/Nckx30C/Ca-alpha1T/CG42594/nAChRbeta2/nAChRalpha2/CG4587/Ca-alpha1D/CG15270/para/Nmdar2/CG1090/nAChRalpha3/CG1688/GluRIB/GluRIA/Shawl/CG42340/CG10470/Task7/Ih/nAChRalpha6/nAChRalpha7/cac/eag/NaCP60E/CG42260/jp/tipE/Hk/bib/SK/Cngl/nAChRalpha1/Mid1/nAChRalpha5/Shaw/Trpgamma/Trpm/Shab/Shal/SLO2/Sh/nAChRbeta1/slo/MCU/unc80/CG11155/KCNQ/stj/Ca-beta/CG43155/Task6/Elk/Piezo/nAChRalpha4/Nmdar1/olf186…	61		Male.marker.genes	GO:0001654	eye development	191/2449	429/12275	5.97543e-32	6.63273e-30	3.28044e-30	hth/mbl/tsh/Wnt4/tsr/Lim1/Nckx30C/bi/toy/Trim9/hbs/klg/Nna1/p120ctn/put/Lar/emc/pyd/M6/CkIIalpha/noc/Rab11/elB/Efa6/CSN5/CadN/Cam/futsch/tutl/wls/pros/faf/zip/fra/aPKC/Ten-m/Chc/fred/rin/EMC3/SP2353/CadN2/mask/Lis-1/ed/Hs3st-B/sns/Nrk/Frl/Fas2/cdi/Diap1/dlp/stan/CSN8/Arpc1/CSN4/klar/br/Pka-C1/Mbs/norpA/S/crb/Gug/RASSF8/puc/lola/lilli/Src64B/arr/vimar/tinc/Socs36E/cindr/eys/rho/hid/Rala/beat-Ia/ms…	191		Male.marker.genes	GO:1990204	oxidoreductase complex	55/2364	100/11938	5.60914e-15	1.18259e-13	6.15037e-14	ND-SGDH/ND-MWFE/ND-42/ND-ASHI/ND-B14.5B/ND-15/CG11752/SdhB/ND-30/SdhC/Cyt-c1/ND-19/UQCR-C2/ND-B12/ND-PDSW/UQCR-C1/UQCR-14/UQCR-Q/UQCR-6.4/ND-13A/ND-B14.7/Nc73EF/CG7834/RFeSP/ND-MLRQ/ND-39/ND-B15/CG5214/ND-B17.2/ND-18/ND-B14/CG17691/ND-23/SdhA/ND-75/ND-B18/ND-51/ox/muc/CG7430/ND-24/ND-ACP/ND-20/ND-B16.6/SdhD/ND-13B/ND-49/ND-B22/ND-B14.5A/ND-AGGG/Sirup/NP15.6/UQCR-11/Duox/CG40472	55
Male.marker.genes	GO:0016651	oxidoreductase activity, acting on NAD(P)H	34/2323	66/12127	3.47398e-09	8.99065e-08	6.05569e-08	ND-SGDH/ND-42/ND-ASHI/ND-B14.5B/ND-30/ND-19/ND-B12/ND-PDSW/Nos/ND-MLRQ/ND-39/ND-B15/ND-B17.2/ND-18/ND-B14/ND-23/ND-75/ND-B18/ND-51/CG7430/ND-24/ND-20/ND-B16.6/ND-13B/ND-49/ND-B22/cl/ND-B14.5A/Grx1/CG5946/CG10672/ECSIT/Duox/Fdh	34		Male.marker.genes	GO:0048880	sensory system development	191/2449	429/12275	5.97543e-32	6.63273e-30	3.28044e-30	hth/mbl/tsh/Wnt4/tsr/Lim1/Nckx30C/bi/toy/Trim9/hbs/klg/Nna1/p120ctn/put/Lar/emc/pyd/M6/CkIIalpha/noc/Rab11/elB/Efa6/CSN5/CadN/Cam/futsch/tutl/wls/pros/faf/zip/fra/aPKC/Ten-m/Chc/fred/rin/EMC3/SP2353/CadN2/mask/Lis-1/ed/Hs3st-B/sns/Nrk/Frl/Fas2/cdi/Diap1/dlp/stan/CSN8/Arpc1/CSN4/klar/br/Pka-C1/Mbs/norpA/S/crb/Gug/RASSF8/puc/lola/lilli/Src64B/arr/vimar/tinc/Socs36E/cindr/eys/rho/hid/Rala/beat-Ia/ms…	191		Male.marker.genes	GO:0098590	plasma membrane region	121/2364	314/11938	6.04834e-15	1.22418e-13	6.36667e-14	Tob/sosie/hbs/Fas3/nAChRbeta2/Lar/pyd/dpr10/nAChRalpha2/Nrt/dpr3/Arl4/Rab11/dpr15/sqh/Atpalpha/CaMKII/Cals/Nrx-1/Ten-a/wls/zip/Rdl/dpr14/aPKC/Ten-m/Ca-alpha1D/Dap160/Dg/dpr19/dpr13/DIP-gamma/dpr20/nAChRalpha3/mgl/dpr11/Tl/dpr9/Fas2/dpr8/Pde6/sdt/Shawl/dpr5/veli/Flo1/dpr18/dpr17/Syx1A/nAChRalpha6/nAChRalpha7/Nlg2/Prosap/inaE/cac/dpr6/crb/kug/dpr2/Fife/cindr/Exn/nuf/dally/kek1/yrt/dpr12/nAChRalpha1…	121
Male.marker.genes	GO:0005525	GTP binding	60/2323	154/12127	7.51e-09	1.79962e-07	1.21214e-07	eEF1alpha1/CG6195/betaTub56D/Rab3/alphaTub84B/CG8641/Arl4/RabX4/Sep2/Rab11/Sep4/Sar1/Galphao/awd/Galphas/Rheb/CG42541/CenG1A/CG8500/Rgk3/Rala/CG30158/CG13375/Rac1/chb/CG1354/alphaTub84D/Rgk2/Ric/Rgk1/mEFTu1/Rab6/RhoBTB/eIF5B/Rab26/Ran/Rab14/RhoGAPp190/Rab27/shi/CG14669/Rab35/Arf102F/Rab21/Sep1/Rab4/eIF2gamma/gammaTub23C/Drp1/AdSS/pnut/Rho1/eEF2/Non1/Rab40/Ras64B/Marf/Rab1/Rab7/Arf51F	60		Male.marker.genes	GO:0150063	visual system development	191/2449	429/12275	5.97543e-32	6.63273e-30	3.28044e-30	hth/mbl/tsh/Wnt4/tsr/Lim1/Nckx30C/bi/toy/Trim9/hbs/klg/Nna1/p120ctn/put/Lar/emc/pyd/M6/CkIIalpha/noc/Rab11/elB/Efa6/CSN5/CadN/Cam/futsch/tutl/wls/pros/faf/zip/fra/aPKC/Ten-m/Chc/fred/rin/EMC3/SP2353/CadN2/mask/Lis-1/ed/Hs3st-B/sns/Nrk/Frl/Fas2/cdi/Diap1/dlp/stan/CSN8/Arpc1/CSN4/klar/br/Pka-C1/Mbs/norpA/S/crb/Gug/RASSF8/puc/lola/lilli/Src64B/arr/vimar/tinc/Socs36E/cindr/eys/rho/hid/Rala/beat-Ia/ms…	191		Male.marker.genes	GO:0005740	mitochondrial envelope	120/2364	313/11938	1.21367e-14	2.36199e-13	1.22841e-13	ND-SGDH/ND-MWFE/ND-42/prel/CG34132/ND-ASHI/ND-B14.5B/ND-15/Cchl/CG11752/SdhB/Tom7/ND-30/CG8004/SdhC/Cyt-c1/ND-19/UQCR-C2/ND-B12/ND-PDSW/UQCR-C1/ATPsynF/ATPsynbeta/COX5A/COX4/porin/UQCR-14/Cyt-c-p/sesB/blw/CG6878/UQCR-Q/ATPsynCF6/cype/QIL1/sun/Neb-cGP/Tom20/COX5B/UQCR-6.4/ND-13A/CG5903/ND-B14.7/ATPsynB/COX7C/Hsc70-4/Mgstl/COX7A/Scox/CG5059/GC1/ATPsynG/levy/ATPsynC/RFeSP/ATPsyndelta/ND-MLRQ/Mpcp2/A…	120
Male.marker.genes	GO:0032550	purine ribonucleoside binding	60/2323	154/12127	7.51e-09	1.79962e-07	1.21214e-07	eEF1alpha1/CG6195/betaTub56D/Rab3/alphaTub84B/CG8641/Arl4/RabX4/Sep2/Rab11/Sep4/Sar1/Galphao/awd/Galphas/Rheb/CG42541/CenG1A/CG8500/Rgk3/Rala/CG30158/CG13375/Rac1/chb/CG1354/alphaTub84D/Rgk2/Ric/Rgk1/mEFTu1/Rab6/RhoBTB/eIF5B/Rab26/Ran/Rab14/RhoGAPp190/Rab27/shi/CG14669/Rab35/Arf102F/Rab21/Sep1/Rab4/eIF2gamma/gammaTub23C/Drp1/AdSS/pnut/Rho1/eEF2/Non1/Rab40/Ras64B/Marf/Rab1/Rab7/Arf51F	60		Male.marker.genes	GO:0048707	instar larval or pupal morphogenesis	204/2449	475/12275	1.93399e-31	2.06722e-29	1.02241e-29	Btk29A/Idh3b/path/hth/Ubx/tsh/zfh2/salr/tsr/app/Lim1/hdc/bi/Bx/ct/ap/CG43658/put/emc/BI-1/Mmp2/sqh/Cam/ctp/Actbeta/wls/Nrg/zip/shot/drpr/svr/GEFmeso/tok/Dg/ed/MYPT-75D/Hs3st-B/Galphao/Fas2/sbb/mam/Galphas/Diap1/dlp/CSN8/disco-r/msn/br/Pka-C1/Dys/Mbs/S/pan/Gug/puc/lola/arr/Dad/Socs36E/Rbfox1/tld/Exn/Mkp3/ftz-f1/flw/bab1/bab2/bib/rho/hid/Drak/mbc/corto/spen/nmo/Eip74EF/dally/cg/crol/otk/cic/sty/Mad…	204		Male.marker.genes	GO:0030054	cell junction	74/2364	160/11938	2.63482e-14	4.93784e-13	2.56805e-13	kune/hbs/Fas3/crim/p120ctn/Lar/pyd/Lac/nrv2/pck/Cont/sqh/Efa6/Atpalpha/CadN/shakB/Nrg/zip/aPKC/shot/CadN2/ed/sns/Nrx-IV/smal/sdt/veli/stan/Mbs/crb/RASSF8/kug/LRR/bib/otk/yrt/ena/Magi/rhea/Csk/otk2/rst/Abl/kirre/PDZ-GEF/Moe/Src42A/mew/Fak/Kank/dlg1/wech/arm/cora/Dl/ckn/scrib/wts/Swip-1/Pax/stck/CG45049/cno/shg/wun/ASPP/ogre/Rho1/baz/Liprin-alpha/vari/kibra/Arf51F/kon	74
Male.marker.genes	GO:0032561	guanyl ribonucleotide binding	61/2323	158/12127	8.48754e-09	1.91236e-07	1.28808e-07	eEF1alpha1/CG6195/betaTub56D/Rab3/alphaTub84B/CG8641/Arl4/RabX4/Sep2/Rab11/Sep4/Sar1/Galphao/awd/Galphas/Rheb/CG42541/CenG1A/CG8500/Rgk3/CG42260/Rala/CG30158/CG13375/Rac1/chb/CG1354/alphaTub84D/Rgk2/Ric/Rgk1/mEFTu1/Rab6/RhoBTB/eIF5B/Rab26/Ran/Rab14/RhoGAPp190/Rab27/shi/CG14669/Rab35/Arf102F/Rab21/Sep1/Rab4/eIF2gamma/gammaTub23C/Drp1/AdSS/pnut/Rho1/eEF2/Non1/Rab40/Ras64B/Marf/Rab1/Rab7/Arf51F	61		Male.marker.genes	GO:0051960	regulation of nervous system development	167/2449	358/12275	5.9698e-31	6.15316e-29	3.04325e-29	Rtca/hth/COX5A/COX4/UQCR-14/Imp/Antp/nwk/COX7C/hdc/Trim9/ham/Syp/CG10257/Lar/emc/CadN/CaMKII/Cals/Sdc/ctp/futsch/PlexA/tutl/Actbeta/pros/fra/aPKC/shot/Dap160/Lis-1/ed/Hs3st-B/Sema1a/Sar1/robo1/Galphao/Dhc64C/Fas2/Spn/Syn1/veli/cdi/stan/wit/Rheb/Adf1/nudC/SoxN/Octbeta2R/Prosap/Mbs/cac/kuz/numb/Src64B/tinc/Dlic/Dad/Socs36E/erm/nmo/Dscam1/Alk/sty/Mad/CG34401/Smox/EcR/dysc/plum/brat/ena/DAAM/CG7834/O…	167		Male.marker.genes	GO:0005840	ribosome	111/2364	287/11938	6.14885e-14	1.11119e-12	5.77899e-13	mRpL21/mRpL2/mRpL12/MCTS1/mRpS7/mRpL16/tko/mRpS10/RpS3A/RpS23/RpL19/mRpS25/mRpL22/RpL26/RpL15/RpS9/RpL36/RpL23/RpL31/RpL12/RpL41/RpS6/RpS21/RpL28/RpS20/RpL39/RpL23A/RpS7/RpL32/RpL37A/RpLP0/RpL38/RpL29/RpL35/RpL5/RpLP1/RpL27/sta/RpS26/RpL8/RpS4/RpS12/RpS27/RpS29/RpS16/RpS8/RpS25/RpS15/RpL35A/RpL13/RpL7/RpL4/RpL18/RpL30/RpL7A/RpL36A/RpL11/RpS19a/mRpL27/mRpL44/RpL24/mRpL20/mRpL24/mRpL41/mRpS24/mRpL5…	111
Male.marker.genes	GO:0003954	NADH dehydrogenase activity	25/2323	42/12127	8.57165e-09	1.91236e-07	1.28808e-07	ND-SGDH/ND-42/ND-ASHI/ND-B14.5B/ND-30/ND-19/ND-B12/ND-PDSW/ND-MLRQ/ND-39/ND-B15/ND-B17.2/ND-18/ND-B14/ND-23/ND-75/ND-B18/ND-51/ND-24/ND-20/ND-B16.6/ND-13B/ND-49/ND-B22/ND-B14.5A	25		Male.marker.genes	GO:0045595	regulation of cell differentiation	190/2449	432/12275	6.20303e-31	6.17309e-29	3.05311e-29	CG11000/Rtca/hth/COX5A/COX4/UQCR-14/Imp/Ubx/Abd-B/Antp/COX7C/hdc/Trim9/ham/mspo/bru1/CG10257/Lar/emc/Snoo/Rab11/tsu/CSN5/CadN/ctp/PlexA/tutl/Actbeta/pros/zip/fra/aPKC/shot/enc/Dap160/Pdcd4/Bruce/mask/Lis-1/ed/Hs3st-B/Sema1a/Sar1/robo1/Dhc64C/Fas2/lwr/cdi/mago/Diap1/stan/Rheb/Adf1/asrij/nudC/SoxN/Syx1A/klar/Pka-C1/Prosap/Mbs/norpA/kuz/puc/numb/tai/Src64B/tinc/Dlic/Socs36E/bab2/hid/erm/mbc/Dscam1/A…	190		Male.marker.genes	GO:0031967	organelle envelope	149/2364	432/11938	2.23996e-13	3.77807e-12	1.96488e-12	ND-SGDH/ND-MWFE/ND-42/prel/CG34132/ND-ASHI/ND-B14.5B/ND-15/Cchl/CG11752/SdhB/Tom7/Torsin/ND-30/CG8004/SdhC/Cyt-c1/ND-19/UQCR-C2/ND-B12/ND-PDSW/UQCR-C1/ATPsynF/ATPsynbeta/COX5A/COX4/porin/UQCR-14/Cyt-c-p/14-3-3zeta/sesB/blw/Msp300/CG6878/UQCR-Q/ATPsynCF6/cype/QIL1/sun/Neb-cGP/Tom20/COX5B/UQCR-6.4/ND-13A/CG5903/ND-B14.7/ATPsynB/COX7C/bru1/Fas3/Hsc70-4/schlank/Mgstl/Rab11/Fs(2)Ket/Mtor/Lis-1/COX7A/S…	149
Male.marker.genes	GO:0019829	cation-transporting ATPase activity	32/2323	62/12127	9.43217e-09	2.0342e-07	1.37015e-07	ATPsynbeta/nrv3/blw/sun/Vha26/SPoCk/ATPsynB/VhaAC45/nrv2/Atpalpha/PMCA/Vha16-1/Vha68-1/VhaPPA1-1/SERCA/CG31030/ATPsynG/ATPsynC/ATPsyndelta/ATPsyngamma/ATPsynD/ATPsynO/ATPsynE/rdgB/Vha13/Vha36-1/VhaM9.7-b/Vha14-1/Vha44/Vha55/VhaSFD/VhaAC39-1	32		Male.marker.genes	GO:0048569	post-embryonic animal organ development	208/2449	492/12275	6.73381e-31	6.47792e-29	3.20388e-29	Btk29A/path/Torsin/hth/Ubx/tsh/zfh2/Msp300/salr/tsr/app/Lim1/bi/Bx/ct/ap/CG43658/put/emc/Mmp2/sqh/CSN5/ctp/Actbeta/wls/Nrg/zip/shot/crp/svr/GEFmeso/tok/Dg/ed/MYPT-75D/Hs3st-B/sns/Galphao/Tl/Fas2/sbb/mam/lwr/Galphas/ths/Diap1/dlp/CSN8/asrij/disco-r/klar/msn/Pka-C1/Dys/Mbs/S/pan/Gug/puc/lola/arr/Dad/Socs36E/Rbfox1/tld/Exn/Mkp3/ftz-f1/flw/bab1/bab2/bib/rho/hid/Drak/mbc/corto/spen/nmo/dally/cg/crol/l…	208		Male.marker.genes	GO:0031975	envelope	149/2364	432/11938	2.23996e-13	3.77807e-12	1.96488e-12	ND-SGDH/ND-MWFE/ND-42/prel/CG34132/ND-ASHI/ND-B14.5B/ND-15/Cchl/CG11752/SdhB/Tom7/Torsin/ND-30/CG8004/SdhC/Cyt-c1/ND-19/UQCR-C2/ND-B12/ND-PDSW/UQCR-C1/ATPsynF/ATPsynbeta/COX5A/COX4/porin/UQCR-14/Cyt-c-p/14-3-3zeta/sesB/blw/Msp300/CG6878/UQCR-Q/ATPsynCF6/cype/QIL1/sun/Neb-cGP/Tom20/COX5B/UQCR-6.4/ND-13A/CG5903/ND-B14.7/ATPsynB/COX7C/bru1/Fas3/Hsc70-4/schlank/Mgstl/Rab11/Fs(2)Ket/Mtor/Lis-1/COX7A/S…	149
Male.marker.genes	GO:0019899	enzyme binding	142/2323	479/12127	1.1226e-08	2.34297e-07	1.57811e-07	Blimp-1/Msp300/Gdi/CG43658/plx/CG10283/CG40228/Rpn10/CG3226/Fs(2)Ket/Efa6/Nrx-1/futsch/Cdep/ZAP3/GEFmeso/mask/Tomosyn/MYPT-75D/drl/Frl/CG42673/Sec61beta/smt3/lwr/Diap1/Mob3/CG14184/mats/eEF1delta/Mbs/alc/crb/pan/Fife/Exn/hid/Nop17l/Lk6/nuf/mbc/AGO1/trx/Smr/Evi5/siz/RhoGDI/CG7029/Ziz/Tnpo/DAAM/Magi/Epac/Cks85A/Rac1/C3G/Atg8a/eIF3m/CycG/CG32506/spg/CG42674/rdx/CG33144/atms/spri/PDZ-GEF/yki/Tm1/trio…	142		Male.marker.genes	GO:0048749	compound eye development	178/2449	397/12275	2.84342e-30	2.64713e-28	1.30923e-28	hth/mbl/tsh/tsr/Lim1/Nckx30C/bi/toy/Trim9/hbs/klg/p120ctn/put/Lar/emc/pyd/M6/CkIIalpha/noc/Rab11/elB/Efa6/CSN5/CadN/Cam/futsch/tutl/wls/pros/faf/zip/fra/aPKC/Ten-m/Chc/fred/rin/EMC3/SP2353/CadN2/mask/Lis-1/ed/Hs3st-B/sns/Nrk/Frl/cdi/Diap1/dlp/stan/CSN8/Arpc1/CSN4/klar/br/Pka-C1/Mbs/norpA/S/crb/RASSF8/puc/lola/lilli/Src64B/arr/vimar/Socs36E/cindr/eys/rho/hid/Rala/msi/spen/nmo/dally/Alk/siz/chn/phy…	178		Male.marker.genes	GO:0022625	cytosolic large ribosomal subunit	37/2364	58/11938	3.01812e-13	4.92634e-12	2.56207e-12	RpL19/RpL26/RpL15/RpL36/RpL23/RpL31/RpL12/RpL41/RpL28/RpL39/RpL23A/RpL32/RpL37A/RpLP0/RpL38/RpL29/RpL35/RpL5/RpLP1/RpL27/RpL8/RpL35A/RpL13/RpL7/RpL4/RpL18/RpL30/RpL7A/RpL36A/RpL11/RpL24/RpL14/RpL24-like/RpL9/RpL6/RpL18A/RpL34a	37
Male.marker.genes	GO:0019001	guanyl nucleotide binding	62/2323	163/12127	1.25285e-08	2.48929e-07	1.67667e-07	eEF1alpha1/CG6195/betaTub56D/Rab3/alphaTub84B/CG8641/Arl4/RabX4/Sep2/Rab11/Sep4/Sar1/Galphao/awd/Galphas/Rheb/CG42541/CenG1A/CG8500/Rgk3/CG42260/Rala/CG30158/Galphaq/CG13375/Rac1/chb/CG1354/alphaTub84D/Rgk2/Ric/Rgk1/mEFTu1/Rab6/RhoBTB/eIF5B/Rab26/Ran/Rab14/RhoGAPp190/Rab27/shi/CG14669/Rab35/Arf102F/Rab21/Sep1/Rab4/eIF2gamma/gammaTub23C/Drp1/AdSS/pnut/Rho1/eEF2/Non1/Rab40/Ras64B/Marf/Rab1/Rab7/Arf…	62		Male.marker.genes	GO:0007560	imaginal disc morphogenesis	186/2449	428/12275	1.73305e-29	1.51563e-27	7.49605e-28	Btk29A/path/hth/Ubx/tsh/zfh2/salr/tsr/app/Lim1/bi/Bx/ct/ap/CG43658/put/emc/Mmp2/sqh/ctp/Actbeta/wls/Nrg/zip/shot/svr/GEFmeso/tok/Dg/ed/MYPT-75D/Hs3st-B/Galphao/Fas2/sbb/mam/Galphas/Diap1/dlp/CSN8/disco-r/msn/Pka-C1/Dys/Mbs/S/pan/Gug/puc/lola/arr/Dad/Socs36E/Rbfox1/tld/Exn/Mkp3/ftz-f1/flw/bab1/bab2/bib/rho/hid/Drak/mbc/corto/spen/nmo/dally/cg/crol/otk/cic/sty/Mad/Smox/wge/EcR/kay/Gprk2/jing/vn/Phm…	186		Male.marker.genes	GO:0097060	synaptic membrane	40/2364	66/11938	3.86111e-13	6.10538e-12	3.17526e-12	Tob/nAChRbeta2/nAChRalpha2/CaMKII/Cals/Nrx-1/Ten-a/wls/Ten-m/Dap160/nAChRalpha3/Fas2/veli/Syx1A/nAChRalpha6/nAChRalpha7/Nlg2/Prosap/inaE/Fife/Exn/nAChRalpha1/orb2/Syt4/Lrp4/Ank2/nAChRalpha5/brp/gukh/nAChRbeta1/slo/unc-13/CG11155/dlg1/Drep2/scrib/shi/nAChRalpha4/Nmdar1/Synd	40
Male.marker.genes	GO:0004888	transmembrane signaling receptor activity	110/2323	348/12127	1.26965e-08	2.48929e-07	1.67667e-07	CG13579/Ptp99A/klg/AstC-R1/GABA-B-R3/nAChRbeta2/put/Lar/AstC-R2/nAChRalpha2/mGluR/TyrR/PlexA/Rdl/fra/CG7166/FMRFaR/Nmdar2/DopEcR/GABA-B-R2/mAChR-A/drl/GABA-B-R1/nAChRalpha3/Nrk/GluRIB/Tl/GluRIA/5-HT1A/fz2/Oct-TyrR/pHCl-1/stan/wit/GluClalpha/AstA-R1/nAChRalpha6/CG12290/nAChRalpha7/Octbeta2R/CG43795/Dop2R/CG44153/TrissinR/arr/TkR86C/Octbeta3R/Ptp10D/Dscam1/Alk/otk/CCKLR-17D3/nAChRalpha1/Dh31-R/Octb…	110		Male.marker.genes	GO:0048563	post-embryonic animal organ morphogenesis	186/2449	428/12275	1.73305e-29	1.51563e-27	7.49605e-28	Btk29A/path/hth/Ubx/tsh/zfh2/salr/tsr/app/Lim1/bi/Bx/ct/ap/CG43658/put/emc/Mmp2/sqh/ctp/Actbeta/wls/Nrg/zip/shot/svr/GEFmeso/tok/Dg/ed/MYPT-75D/Hs3st-B/Galphao/Fas2/sbb/mam/Galphas/Diap1/dlp/CSN8/disco-r/msn/Pka-C1/Dys/Mbs/S/pan/Gug/puc/lola/arr/Dad/Socs36E/Rbfox1/tld/Exn/Mkp3/ftz-f1/flw/bab1/bab2/bib/rho/hid/Drak/mbc/corto/spen/nmo/dally/cg/crol/otk/cic/sty/Mad/Smox/wge/EcR/kay/Gprk2/jing/vn/Phm…	186		Male.marker.genes	GO:0031410	cytoplasmic vesicle	134/2364	380/11938	5.97895e-13	8.89809e-12	4.62767e-12	path/VGAT/CG32225/fwe/nwk/Gdi/Rab3/hbs/Fas3/Frq2/RabX4/Rab11/PIP4K/Vps24/7B2/wls/nSyb/Nhe3/bai/eca/Chc/p24-1/aph-1/CHOp24/Dap160/Lamp1/olf413/Tomosyn/ed/Sar1/CG13784/unc-13-4A/Tl/cmpy/fz2/Tbh/CG15168/Snx3/wit/CG14184/asrij/w/Syx1A/S/arr/Syx6/Syt12/Rim/bib/rho/CanB2/nuf/Evi5/Klp98A/shrb/jeb/CG1275/Sytbeta/VGlut/Syt4/Rac1/CanB/Ykt6/CG34384/spri/Cadps/Chmp1/yki/Syn/VAChT/fz/Cirl/Rab6/unc-13/Atet/Rab…	134
Male.marker.genes	GO:0015077	monovalent inorganic cation transmembrane transporter activity	82/2323	238/12127	1.36944e-08	2.60596e-07	1.75526e-07	ATPsynbeta/COX5A/COX4/VGAT/nrv3/CG10804/blw/ATPsynCF6/cype/Calx/sun/kcc/COX5B/Vha26/SPoCk/ATPsynB/COX8/Nckx30C/COX7C/CG42594/VhaAC45/nrv2/Atpalpha/Vha16-1/Nhe3/Vha68-1/VhaPPA1-1/para/CG43066/CG1090/Ndae1/CG1688/SERCA/GluRIA/COX7A/Shawl/CG42340/CG31030/Task7/Ih/eag/NaCP60E/tipE/Hk/SK/CG10960/Shaw/GC1/ATPsynG/levy/ATPsynC/Shab/ATPsyndelta/ND-MLRQ/ATPsyngamma/COX6B/ATPsynD/ATPsynO/Shal/ATPsynE/SLO2/…	82		Male.marker.genes	GO:0032879	regulation of localization	198/2449	472/12275	6.76041e-29	5.73839e-27	2.83812e-27	Torsin/cpx/nemy/Rab3/tsr/CG9650/sky/Pvf3/Teh1/Lar/pyd/Akap200/Frq2/RabX4/Rab11/PIP4K/tsu/CadN/CaMKII/Cam/Nrx-1/PlexA/wls/pros/zip/Teh2/fra/CG6329/aPKC/IA-2/drpr/sli/Chc/Mtor/enc/rho-5/Glut1/Tomosyn/GABA-B-R2/Sema1a/Sar1/robo1/Sec61alpha/mgl/SERCA/cmpy/smt3/Pde6/sdt/CaBP1/mago/Diap1/Snx3/dlp/stan/Rheb/Ih/Syx1A/klar/qvr/Pka-C1/Dys/Prosap/norpA/cac/S/crb/kuz/puc/numb/tai/lilli/AdipoR/Fife/cindr/Rgk3…	198		Male.marker.genes	GO:0097708	intracellular vesicle	134/2364	380/11938	5.97895e-13	8.89809e-12	4.62767e-12	path/VGAT/CG32225/fwe/nwk/Gdi/Rab3/hbs/Fas3/Frq2/RabX4/Rab11/PIP4K/Vps24/7B2/wls/nSyb/Nhe3/bai/eca/Chc/p24-1/aph-1/CHOp24/Dap160/Lamp1/olf413/Tomosyn/ed/Sar1/CG13784/unc-13-4A/Tl/cmpy/fz2/Tbh/CG15168/Snx3/wit/CG14184/asrij/w/Syx1A/S/arr/Syx6/Syt12/Rim/bib/rho/CanB2/nuf/Evi5/Klp98A/shrb/jeb/CG1275/Sytbeta/VGlut/Syt4/Rac1/CanB/Ykt6/CG34384/spri/Cadps/Chmp1/yki/Syn/VAChT/fz/Cirl/Rab6/unc-13/Atet/Rab…	134
Male.marker.genes	GO:0001883	purine nucleoside binding	60/2323	157/12127	1.74929e-08	3.14387e-07	2.11756e-07	eEF1alpha1/CG6195/betaTub56D/Rab3/alphaTub84B/CG8641/Arl4/RabX4/Sep2/Rab11/Sep4/Sar1/Galphao/awd/Galphas/Rheb/CG42541/CenG1A/CG8500/Rgk3/Rala/CG30158/CG13375/Rac1/chb/CG1354/alphaTub84D/Rgk2/Ric/Rgk1/mEFTu1/Rab6/RhoBTB/eIF5B/Rab26/Ran/Rab14/RhoGAPp190/Rab27/shi/CG14669/Rab35/Arf102F/Rab21/Sep1/Rab4/eIF2gamma/gammaTub23C/Drp1/AdSS/pnut/Rho1/eEF2/Non1/Rab40/Ras64B/Marf/Rab1/Rab7/Arf51F	60		Male.marker.genes	GO:0048736	appendage development	168/2449	374/12275	1.00662e-28	8.30033e-27	4.10521e-27	Btk29A/path/hth/Ubx/tsh/zfh2/salr/tsr/app/Lim1/bi/Bx/ct/ap/CG43658/put/emc/elB/sqh/ctp/Actbeta/wls/zip/shot/svr/GEFmeso/tok/Dg/ed/MYPT-75D/Hs3st-B/drl/Galphao/sbb/mam/Galphas/Diap1/dlp/CSN8/disco/disco-r/Syx1A/Pka-C1/Dys/Mbs/S/pan/Gug/lola/arr/Dad/Socs36E/Rbfox1/tld/Exn/Mkp3/ftz-f1/flw/D/bib/rho/hid/Drak/corto/spen/HnRNP-K/nmo/dally/cg/trx/crol/cic/sty/Mad/Smox/EcR/Gprk2/jing/vn/Phm/Rac1/heph/rhe…	168		Male.marker.genes	GO:0005747	mitochondrial respiratory chain complex I	34/2364	53/11938	2.2022e-12	3.01166e-11	1.56629e-11	ND-SGDH/ND-MWFE/ND-42/ND-ASHI/ND-B14.5B/ND-15/CG11752/ND-30/ND-19/ND-B12/ND-PDSW/ND-13A/ND-B14.7/ND-MLRQ/ND-39/ND-B15/ND-B17.2/ND-18/ND-B14/ND-23/ND-75/ND-B18/ND-51/ND-24/ND-ACP/ND-20/ND-B16.6/ND-13B/ND-49/ND-B22/ND-B14.5A/ND-AGGG/NP15.6/CG40472	34
Male.marker.genes	GO:0032549	ribonucleoside binding	60/2323	157/12127	1.74929e-08	3.14387e-07	2.11756e-07	eEF1alpha1/CG6195/betaTub56D/Rab3/alphaTub84B/CG8641/Arl4/RabX4/Sep2/Rab11/Sep4/Sar1/Galphao/awd/Galphas/Rheb/CG42541/CenG1A/CG8500/Rgk3/Rala/CG30158/CG13375/Rac1/chb/CG1354/alphaTub84D/Rgk2/Ric/Rgk1/mEFTu1/Rab6/RhoBTB/eIF5B/Rab26/Ran/Rab14/RhoGAPp190/Rab27/shi/CG14669/Rab35/Arf102F/Rab21/Sep1/Rab4/eIF2gamma/gammaTub23C/Drp1/AdSS/pnut/Rho1/eEF2/Non1/Rab40/Ras64B/Marf/Rab1/Rab7/Arf51F	60		Male.marker.genes	GO:0060284	regulation of cell development	159/2449	348/12275	3.08321e-28	2.47171e-26	1.22247e-26	Rtca/hth/COX5A/COX4/UQCR-14/Imp/Antp/COX7C/hdc/Trim9/ham/CG10257/Lar/emc/Rab11/tsu/CadN/ctp/PlexA/tutl/Actbeta/pros/zip/fra/aPKC/shot/enc/Dap160/Bruce/mask/Lis-1/ed/Hs3st-B/Sema1a/Sar1/robo1/Dhc64C/Fas2/cdi/mago/Diap1/stan/Rheb/Adf1/nudC/SoxN/Syx1A/klar/Pka-C1/Prosap/Mbs/norpA/kuz/puc/numb/tai/Src64B/tinc/Dlic/Socs36E/hid/erm/mbc/Dscam1/Alk/sty/CG34401/Smox/EcR/kay/Hrb27C/brat/Galphaq/DAAM/vn/CG7…	159		Male.marker.genes	GO:0030964	NADH dehydrogenase complex	34/2364	53/11938	2.2022e-12	3.01166e-11	1.56629e-11	ND-SGDH/ND-MWFE/ND-42/ND-ASHI/ND-B14.5B/ND-15/CG11752/ND-30/ND-19/ND-B12/ND-PDSW/ND-13A/ND-B14.7/ND-MLRQ/ND-39/ND-B15/ND-B17.2/ND-18/ND-B14/ND-23/ND-75/ND-B18/ND-51/ND-24/ND-ACP/ND-20/ND-B16.6/ND-13B/ND-49/ND-B22/ND-B14.5A/ND-AGGG/NP15.6/CG40472	34
Male.marker.genes	GO:0005244	voltage-gated ion channel activity	23/2323	38/12127	2.17704e-08	3.70669e-07	2.49666e-07	porin/Ca-alpha1T/CG4587/Ca-alpha1D/Nmdar2/Shawl/Ih/cac/eag/NaCP60E/Hk/Shaw/Shab/Shal/SLO2/Sh/slo/KCNQ/stj/Ca-beta/GPHR/Elk/Nmdar1	23		Male.marker.genes	GO:0048737	imaginal disc-derived appendage development	165/2449	370/12275	8.84774e-28	6.90124e-26	3.41324e-26	Btk29A/path/hth/Ubx/tsh/zfh2/salr/tsr/app/Lim1/bi/Bx/ct/ap/CG43658/put/emc/elB/sqh/ctp/Actbeta/wls/zip/shot/svr/GEFmeso/tok/Dg/ed/MYPT-75D/Hs3st-B/drl/Galphao/sbb/mam/Galphas/Diap1/dlp/CSN8/disco/disco-r/Syx1A/Pka-C1/Dys/Mbs/S/pan/Gug/lola/arr/Dad/Socs36E/Rbfox1/tld/Exn/Mkp3/ftz-f1/flw/bib/rho/hid/Drak/corto/spen/nmo/dally/cg/trx/crol/cic/sty/Mad/Smox/EcR/Gprk2/jing/vn/Phm/Rac1/heph/rhea/sfl/px/C…	165		Male.marker.genes	GO:0045271	respiratory chain complex I	34/2364	53/11938	2.2022e-12	3.01166e-11	1.56629e-11	ND-SGDH/ND-MWFE/ND-42/ND-ASHI/ND-B14.5B/ND-15/CG11752/ND-30/ND-19/ND-B12/ND-PDSW/ND-13A/ND-B14.7/ND-MLRQ/ND-39/ND-B15/ND-B17.2/ND-18/ND-B14/ND-23/ND-75/ND-B18/ND-51/ND-24/ND-ACP/ND-20/ND-B16.6/ND-13B/ND-49/ND-B22/ND-B14.5A/ND-AGGG/NP15.6/CG40472	34
Male.marker.genes	GO:0022832	voltage-gated channel activity	23/2323	38/12127	2.17704e-08	3.70669e-07	2.49666e-07	porin/Ca-alpha1T/CG4587/Ca-alpha1D/Nmdar2/Shawl/Ih/cac/eag/NaCP60E/Hk/Shaw/Shab/Shal/SLO2/Sh/slo/KCNQ/stj/Ca-beta/GPHR/Elk/Nmdar1	23		Male.marker.genes	GO:0001745	compound eye morphogenesis	150/2449	323/12275	1.28654e-27	9.77096e-26	4.83255e-26	hth/mbl/tsh/tsr/bi/hbs/klg/p120ctn/put/Lar/emc/pyd/M6/noc/Rab11/elB/Efa6/CSN5/CadN/Cam/tutl/wls/pros/faf/zip/aPKC/Ten-m/Chc/fred/rin/EMC3/SP2353/CadN2/mask/Lis-1/ed/Hs3st-B/sns/Nrk/Frl/cdi/Diap1/stan/CSN8/Arpc1/CSN4/klar/br/Mbs/norpA/S/crb/lola/lilli/Src64B/arr/vimar/Socs36E/cindr/eys/rho/hid/Rala/msi/nmo/Alk/siz/chn/phyl/sty/Mad/Hrb98DE/jeb/kay/dysc/Mitf/Galphaq/Rac1/sdk/tau/spg/Apc/rst/kirre/sh…	150		Male.marker.genes	GO:0098794	postsynapse	41/2364	72/11938	3.52657e-12	4.69591e-11	2.44222e-11	Syp/sky/nAChRbeta2/nAChRalpha2/CaMKII/Cals/wls/drpr/Ten-m/nAChRalpha3/Fas2/Spn/eIF4E1/veli/X11Lbeta/nAChRalpha6/nAChRalpha7/Nlg2/Prosap/inaE/nAChRalpha1/Neto/Magi/Syt4/nAChRalpha5/pum/nAChRbeta1/slo/unc-13/CG11155/dlg1/Rpt6/Drep2/scrib/shi/nAChRalpha4/Nmdar1/X11L/Pldn/hts/Synd	41
Male.marker.genes	GO:0022853	active ion transmembrane transporter activity	32/2323	64/12127	2.56083e-08	4.14214e-07	2.78996e-07	ATPsynbeta/nrv3/blw/sun/Vha26/SPoCk/ATPsynB/VhaAC45/nrv2/Atpalpha/PMCA/Vha16-1/Vha68-1/VhaPPA1-1/SERCA/CG31030/ATPsynG/ATPsynC/ATPsyndelta/ATPsyngamma/ATPsynD/ATPsynO/ATPsynE/rdgB/Vha13/Vha36-1/VhaM9.7-b/Vha14-1/Vha44/Vha55/VhaSFD/VhaAC39-1	32		Male.marker.genes	GO:0035220	wing disc development	178/2449	415/12275	2.0569e-27	1.52211e-25	7.5281e-26	Btk29A/gammaSnap1/path/hth/tsh/zfh2/salr/tsr/app/bi/Bx/ct/ap/14-3-3epsilon/put/emc/pyd/noc/elB/sqh/ctp/nmd/Actbeta/wls/Nipped-A/zip/Cow/eca/shot/drpr/svr/CHOp24/GEFmeso/tok/Dg/ed/MYPT-75D/Hs3st-B/Galphao/sbb/mam/Galphas/Snx3/dlp/CSN8/disco-r/Pka-C1/Dys/Mbs/S/crb/pan/Gug/lola/lilli/arr/Dad/Socs36E/Rbfox1/tld/Mkp3/flw/bib/rho/Drak/nuf/corto/CG1943/CG5890/spen/nmo/dally/cg/Smr/crol/cic/sty/Mad/Smox/…	178		Male.marker.genes	GO:0005911	cell-cell junction	51/2364	101/11938	4.44462e-12	5.76661e-11	2.99907e-11	kune/hbs/Fas3/crim/p120ctn/pyd/Lac/nrv2/pck/Cont/sqh/Atpalpha/CadN/shakB/Nrg/zip/aPKC/CadN2/ed/sns/Nrx-IV/sdt/veli/stan/Mbs/crb/otk/yrt/ena/Csk/otk2/rst/Abl/kirre/Moe/dlg1/arm/cora/Dl/scrib/wts/stck/CG45049/cno/shg/wun/ogre/Rho1/baz/vari/kibra	51
Male.marker.genes	GO:0042625	ATPase coupled ion transmembrane transporter activity	32/2323	64/12127	2.56083e-08	4.14214e-07	2.78996e-07	ATPsynbeta/nrv3/blw/sun/Vha26/SPoCk/ATPsynB/VhaAC45/nrv2/Atpalpha/PMCA/Vha16-1/Vha68-1/VhaPPA1-1/SERCA/CG31030/ATPsynG/ATPsynC/ATPsyndelta/ATPsyngamma/ATPsynD/ATPsynO/ATPsynE/rdgB/Vha13/Vha36-1/VhaM9.7-b/Vha14-1/Vha44/Vha55/VhaSFD/VhaAC39-1	32		Male.marker.genes	GO:0048592	eye morphogenesis	156/2449	344/12275	2.79879e-27	1.97007e-25	9.74367e-26	hth/mbl/tsh/tsr/bi/hbs/klg/p120ctn/put/Lar/emc/pyd/M6/noc/Rab11/elB/Efa6/CSN5/CadN/Cam/tutl/wls/pros/faf/zip/aPKC/Ten-m/Chc/fred/rin/EMC3/SP2353/CadN2/mask/Lis-1/ed/Hs3st-B/sns/Nrk/Frl/Fas2/cdi/Diap1/stan/CSN8/Arpc1/CSN4/klar/br/Mbs/norpA/S/crb/lola/lilli/Src64B/arr/vimar/tinc/Socs36E/cindr/eys/rho/hid/Rala/beat-Ia/msi/nmo/Alk/siz/chn/phyl/cic/sty/Mad/Hrb98DE/yrt/jeb/kay/dysc/Mitf/Galphaq/Rac1/sd…	156		Male.marker.genes	GO:0044306	neuron projection terminus	41/2364	74/11938	1.1832e-11	1.49675e-10	7.78424e-11	Cbp53E/VGAT/cpx/sky/Rab11/Nrx-1/nSyb/Fas2/Syx1A/Prosap/kek6/Alk/jeb/orb2/ena/Magi/Lrp4/Ank2/Atg8a/pum/mnb/gukh/Snap25/Rop/Fak/Syn/VAChT/unc-13/CASK/dlg1/Syt1/Mical/prt/metro/Mob4/EndoA/alphaSnap/Srpk79D/Pldn/na/Synd	41
Male.marker.genes	GO:0003779	actin binding	46/2323	110/12127	3.36023e-08	5.30261e-07	3.5716e-07	Msp300/tsr/Akap200/cib/Arpc5/CG15097/futsch/zip/shot/Frl/Spn/Arpc3A/Arpc1/Dys/spir/DAAM/CG8726/rhea/CG32264/pod1/Cortactin/CLIP-190/Moe/Vrp1/CG12964/Tm1/bif/chic/mim/Mical/sn/Svil/cora/shi/capt/sals/Arpc2/pnut/Arp3/capu/hts/CG5023/CG1674/twf/alpha-Spec/CG6891	46		Male.marker.genes	GO:0090596	sensory organ morphogenesis	156/2449	344/12275	2.79879e-27	1.97007e-25	9.74367e-26	hth/mbl/tsh/tsr/bi/hbs/klg/p120ctn/put/Lar/emc/pyd/M6/noc/Rab11/elB/Efa6/CSN5/CadN/Cam/tutl/wls/pros/faf/zip/aPKC/Ten-m/Chc/fred/rin/EMC3/SP2353/CadN2/mask/Lis-1/ed/Hs3st-B/sns/Nrk/Frl/Fas2/cdi/Diap1/stan/CSN8/Arpc1/CSN4/klar/br/Mbs/norpA/S/crb/lola/lilli/Src64B/arr/vimar/tinc/Socs36E/cindr/eys/rho/hid/Rala/beat-Ia/msi/nmo/Alk/siz/chn/phyl/cic/sty/Mad/Hrb98DE/yrt/jeb/kay/dysc/Mitf/Galphaq/Rac1/sd…	156		Male.marker.genes	GO:0031594	neuromuscular junction	42/2364	77/11938	1.32698e-11	1.63769e-10	8.51721e-11	cpx/nwk/Syp/sky/Fas3/Nrx-1/Sdc/Ten-a/wls/Con/Ten-m/Dg/Tomosyn/Fas2/stai/eIF4E1/Smn/dlp/Nlg2/Prosap/cac/Exn/Neto/Pdk1/Magi/Syt4/Ank2/pum/brp/pod1/unc-13/CASK/dlg1/Syt1/cact/scrib/Cip4/Syngr/Pldn/bchs/alpha-Spec/gb	42
Male.marker.genes	GO:0001882	nucleoside binding	60/2323	161/12127	5.1161e-08	7.88123e-07	5.30843e-07	eEF1alpha1/CG6195/betaTub56D/Rab3/alphaTub84B/CG8641/Arl4/RabX4/Sep2/Rab11/Sep4/Sar1/Galphao/awd/Galphas/Rheb/CG42541/CenG1A/CG8500/Rgk3/Rala/CG30158/CG13375/Rac1/chb/CG1354/alphaTub84D/Rgk2/Ric/Rgk1/mEFTu1/Rab6/RhoBTB/eIF5B/Rab26/Ran/Rab14/RhoGAPp190/Rab27/shi/CG14669/Rab35/Arf102F/Rab21/Sep1/Rab4/eIF2gamma/gammaTub23C/Drp1/AdSS/pnut/Rho1/eEF2/Non1/Rab40/Ras64B/Marf/Rab1/Rab7/Arf51F	60		Male.marker.genes	GO:0035107	appendage morphogenesis	162/2449	366/12275	7.634e-27	5.24565e-25	2.59441e-25	Btk29A/path/hth/Ubx/tsh/zfh2/salr/tsr/app/Lim1/bi/Bx/ct/ap/CG43658/put/emc/sqh/ctp/Actbeta/wls/zip/shot/svr/GEFmeso/tok/Dg/ed/MYPT-75D/Hs3st-B/Galphao/sbb/mam/Galphas/Diap1/dlp/CSN8/disco/disco-r/Pka-C1/Dys/Mbs/S/pan/Gug/lola/arr/Dad/Socs36E/Rbfox1/tld/Exn/Mkp3/ftz-f1/flw/D/bib/rho/hid/Drak/corto/spen/HnRNP-K/nmo/dally/cg/crol/cic/sty/Mad/Smox/EcR/Gprk2/jing/vn/Phm/Rac1/heph/rhea/sfl/px/CG42674/s…	162		Male.marker.genes	GO:0030133	transport vesicle	47/2364	92/11938	1.80219e-11	2.17121e-10	1.12919e-10	VGAT/fwe/Gdi/Rab3/Frq2/RabX4/Rab11/wls/nSyb/Chc/Dap160/Tomosyn/Sar1/unc-13-4A/Syx1A/Syx6/Syt12/Rim/CanB2/jeb/Sytbeta/VGlut/Syt4/CanB/Ykt6/Cadps/Syn/VAChT/Cirl/unc-13/Atet/Syt1/Syt7/prt/Dop1R2/Rab27/AP-1sigma/Rab35/syd/Syngr/Eps-15/Rph/Afti/Pldn/Sec22/Syx7/Sec16	47
Male.marker.genes	GO:0005231	excitatory extracellular ligand-gated ion channel activity	11/2323	12/12127	1.23767e-07	1.86226e-06	1.25433e-06	nAChRbeta2/nAChRalpha2/nAChRalpha3/GluClalpha/nAChRalpha6/nAChRalpha7/nAChRalpha1/nAChRalpha5/nAChRbeta1/nAChRalpha4/Grd	11		Male.marker.genes	GO:0040008	regulation of growth	142/2449	303/12275	1.08368e-26	7.27324e-25	3.59723e-25	mRpL12/path/Torsin/Ubx/fwe/nwk/Neb-cGP/chrb/Syp/14-3-3epsilon/Lar/Hr4/PIP4K/CadN/CaMKII/Sdc/futsch/Actbeta/shot/drpr/Chc/rin/Sema1a/Galphao/Tl/Fas2/Nos/cmpy/sbb/Syn1/eIF4E1/veli/dlp/stan/wit/Rheb/Octbeta2R/cac/crb/kuz/RASSF8/tai/CG9328/Src64B/Dad/hid/Lk6/mbc/nmo/dally/Alk/cic/Mad/Smox/dysc/plum/brat/ena/Pdk1/Octbeta1R/Rac1/Ank2/sNPF/pix/pum/Liprin-gamma/mnb/sfl/CycG/Csk/Sesn/Abl/Hipk/Hs6st/Src42A…	142		Male.marker.genes	GO:0031982	vesicle	141/2364	424/11938	2.17245e-11	2.55642e-10	1.32953e-10	path/VGAT/CG32225/fwe/nwk/Gdi/Rab3/hbs/Fas3/Frq2/RabX4/Rab11/PIP4K/Vps24/7B2/wls/nSyb/Nhe3/bai/eca/Chc/p24-1/aph-1/CHOp24/Dap160/Lamp1/olf413/Tomosyn/ed/Sar1/CG13784/robo1/unc-13-4A/Tl/Nos/cmpy/fz2/Tbh/CG15168/Snx3/wit/CG14184/asrij/Dtg/w/Syx1A/S/arr/Syx6/Syt12/Rim/bib/rho/CanB2/nuf/Evi5/Klp98A/shrb/jeb/CG1275/Sytbeta/VGlut/Syt4/Rac1/CanB/Ykt6/CG34384/spri/Cadps/Chmp1/yki/Syn/VAChT/fz/Cirl/Rab6/u…	141
Male.marker.genes	GO:0050839	cell adhesion molecule binding	24/2323	44/12127	1.72231e-07	2.53258e-06	1.70583e-06	CG5758/p120ctn/pyd/plx/CadN/Nrg/CadN2/ed/Fas1/stan/kug/cindr/Gfrl/Ccn/siz/otk/rhea/Ret/kirre/mew/arm/cno/X11L/dock	24		Male.marker.genes	GO:0035114	imaginal disc-derived appendage morphogenesis	160/2449	363/12275	2.81041e-26	1.84337e-24	9.11702e-25	Btk29A/path/hth/Ubx/tsh/zfh2/salr/tsr/app/Lim1/bi/Bx/ct/ap/CG43658/put/emc/sqh/ctp/Actbeta/wls/zip/shot/svr/GEFmeso/tok/Dg/ed/MYPT-75D/Hs3st-B/Galphao/sbb/mam/Galphas/Diap1/dlp/CSN8/disco/disco-r/Pka-C1/Dys/Mbs/S/pan/Gug/lola/arr/Dad/Socs36E/Rbfox1/tld/Exn/Mkp3/ftz-f1/flw/bib/rho/hid/Drak/corto/spen/nmo/dally/cg/crol/cic/sty/Mad/Smox/EcR/Gprk2/jing/vn/Phm/Rac1/heph/rhea/sfl/px/CG42674/shn/PDZ-GEF…	160		Male.marker.genes	GO:0043679	axon terminus	40/2364	73/11938	3.36599e-11	3.87089e-10	2.01315e-10	Cbp53E/cpx/sky/Rab11/Nrx-1/nSyb/Fas2/Syx1A/Prosap/kek6/Alk/jeb/orb2/ena/Magi/Lrp4/Ank2/Atg8a/pum/mnb/gukh/Snap25/Rop/Fak/Syn/VAChT/unc-13/CASK/dlg1/Syt1/Mical/prt/metro/Mob4/EndoA/alphaSnap/Srpk79D/Pldn/na/Synd	40
Male.marker.genes	GO:0015079	potassium ion transmembrane transporter activity	30/2323	62/12127	1.77737e-07	2.55546e-06	1.72124e-06	nrv3/kcc/Nckx30C/CG42594/nrv2/Atpalpha/Nhe3/CG1090/CG1688/GluRIA/Shawl/CG42340/Task7/Ih/eag/Hk/SK/Shaw/Shab/Shal/SLO2/Sh/slo/CG11155/KCNQ/CG43155/Task6/Elk/Nhe2/CG10413	30		Male.marker.genes	GO:0044087	regulation of cellular component biogenesis	145/2449	319/12275	1.52238e-25	9.76355e-24	4.82889e-24	Btk29A/nwk/tsr/Ssb-c31a/Syp/chinmo/CG43658/Lar/Su(var)205/Rpt3/Mmp2/Snoo/Rab11/SF2/Arpc5/tsu/CaMKII/Cals/Sdc/futsch/aPKC/shot/svr/Mtor/Spt-I/enc/Sar1/Galphao/Fas2/Spn/Jupiter/ringer/Syn1/veli/B52/Arpc4/mago/Arpc3A/SC35/x16/stan/wit/Arpc1/Rheb/Taf11/IRSp53/Syx1A/klar/Pka-C1/Octbeta2R/cac/kug/CG11486/Src64B/Dad/CG17816/Dsp1/nmo/Mad/dysc/plum/brat/ena/spir/DAAM/Octbeta1R/Rac1/Ank2/pum/Liprin-gamma/m…	145		Male.marker.genes	GO:0000313	organellar ribosome	42/2364	81/11938	1.15469e-10	1.27016e-09	6.60576e-10	mRpL21/mRpL2/mRpL12/mRpS7/mRpL16/tko/mRpS10/mRpS25/mRpL22/mRpL27/mRpL44/mRpL20/mRpL24/mRpL41/mRpS24/mRpL52/mRpS6/mRpL55/mRpL30/mRpS16/mRpS17/mRpS35/mRpS26/mRpL47/mRpL51/mRpL17/mRpL36/bonsai/mRpS11/mRpS28/mRpS34/mRpS23/mRpL14/mRpL28/mRpL9/mRpS21/mRpL48/mRpS18A/mRpS2/mRpS22/mRpL3/mRpS33	42
Male.marker.genes	GO:0001067	regulatory region nucleic acid binding	111/2323	369/12127	2.03011e-07	2.79464e-06	1.88234e-06	hth/abd-A/Ubx/Abd-B/Antp/dsx/Blimp-1/zfh2/salr/Lim1/bi/ct/toy/ap/Hr4/Eip75B/nonA/scro/jigr1/CSN4/CG43689/disco/dmrt99B/br/CG16779/pan/Rbfox1/ftz-f1/CG9932/CG12605/erm/Smr/Hr3/cic/Mad/EcR/Hr38/kay/NK7.1/Atf3/Trf2/NFAT/Xbp1/TfAP-2/tup/Mef2/vvl/CG10543/drm/odd/CG32532/Rx/grn/mid/Pdp1/Drgx/hb/Optix/NC2beta/Mnn1/sd/Stat92E/CG32767/CHES-1-like/da/Utx/foxo/B-H1/B-H2/sim/ey/Hr51/Dif/CG12769/Lim3/PHDP/Ptx…	111		Male.marker.genes	GO:0035120	post-embryonic appendage morphogenesis	154/2449	353/12275	9.43346e-25	5.91847e-23	2.92718e-23	Btk29A/path/hth/Ubx/tsh/zfh2/salr/tsr/app/Lim1/bi/Bx/ct/ap/CG43658/put/emc/sqh/ctp/Actbeta/wls/zip/shot/svr/GEFmeso/tok/Dg/ed/MYPT-75D/Hs3st-B/Galphao/sbb/mam/Galphas/dlp/CSN8/disco-r/Pka-C1/Dys/Mbs/S/pan/Gug/lola/arr/Dad/Socs36E/Rbfox1/tld/Exn/Mkp3/ftz-f1/flw/D/bib/rho/Drak/corto/spen/nmo/dally/cg/crol/cic/sty/Mad/Smox/EcR/Gprk2/jing/vn/Phm/Rac1/heph/rhea/sfl/px/CG42674/shn/PDZ-GEF/cv-2/fru/Hipk…	154		Male.marker.genes	GO:0005761	mitochondrial ribosome	42/2364	81/11938	1.15469e-10	1.27016e-09	6.60576e-10	mRpL21/mRpL2/mRpL12/mRpS7/mRpL16/tko/mRpS10/mRpS25/mRpL22/mRpL27/mRpL44/mRpL20/mRpL24/mRpL41/mRpS24/mRpL52/mRpS6/mRpL55/mRpL30/mRpS16/mRpS17/mRpS35/mRpS26/mRpL47/mRpL51/mRpL17/mRpL36/bonsai/mRpS11/mRpS28/mRpS34/mRpS23/mRpL14/mRpL28/mRpL9/mRpS21/mRpL48/mRpS18A/mRpS2/mRpS22/mRpL3/mRpS33	42
Male.marker.genes	GO:0044212	transcription regulatory region DNA binding	111/2323	369/12127	2.03011e-07	2.79464e-06	1.88234e-06	hth/abd-A/Ubx/Abd-B/Antp/dsx/Blimp-1/zfh2/salr/Lim1/bi/ct/toy/ap/Hr4/Eip75B/nonA/scro/jigr1/CSN4/CG43689/disco/dmrt99B/br/CG16779/pan/Rbfox1/ftz-f1/CG9932/CG12605/erm/Smr/Hr3/cic/Mad/EcR/Hr38/kay/NK7.1/Atf3/Trf2/NFAT/Xbp1/TfAP-2/tup/Mef2/vvl/CG10543/drm/odd/CG32532/Rx/grn/mid/Pdp1/Drgx/hb/Optix/NC2beta/Mnn1/sd/Stat92E/CG32767/CHES-1-like/da/Utx/foxo/B-H1/B-H2/sim/ey/Hr51/Dif/CG12769/Lim3/PHDP/Ptx…	111		Male.marker.genes	GO:0007416	synapse assembly	93/2449	167/12275	1.08443e-24	6.65887e-23	3.29337e-23	Imp/sesB/Gad1/cpx/nwk/Syp/Lar/caps/Atpalpha/CaMKII/Cals/Nrx-1/Sdc/futsch/Ten-a/pros/aPKC/Ten-m/Nlg4/Sema1a/drl/Galphao/Tl/Fas2/Nrx-IV/Nos/stai/Spn/Syn1/veli/stan/wit/Rheb/Adf1/Octbeta2R/Nlg2/Prosap/cac/lbm/Src64B/Dad/Fife/Nlg3/nmo/AGO1/Mad/jeb/kay/dysc/plum/brat/ena/Pdk1/Octbeta1R/Rac1/Ank2/pum/Liprin-gamma/mnb/Abl/Src42A/simj/Atg1/kis/trio/nej/Akt1/Fak/Syn/slo/Mob2/CASK/dlg1/unc-104/Pak3/Mical/s…	93		Male.marker.genes	GO:0005938	cell cortex	73/2364	182/11938	1.81875e-10	1.95806e-09	1.01834e-09	app/igl/Syp/Sep2/sqh/Sep4/Bsg/Ten-a/pros/zip/aPKC/CD98hc/Chc/Dap160/Rbp/Lis-1/ed/Dhc64C/Spn/sdt/msn/Dys/Mbs/numb/Fife/cindr/Rim/nuf/toc/CG42684/brat/drongo/spir/brp/Abl/spri/Cortactin/Moe/Vrp1/yki/Tm1/Akt1/chic/sano/Lrch/unc-13/corn/Ehbp1/Ran/dlg1/cv-c/Dl/scrib/wts/Rab35/Sep1/strat/capt/Arpc2/cno/shg/Myo31DF/pnut/Rho1/baz/Arp3/capu/tmod/kibra/msk/alpha-Spec/Rab7/CG6891	73
Male.marker.genes	GO:0001158	enhancer sequence-specific DNA binding	19/2323	31/12127	2.82733e-07	3.81101e-06	2.56692e-06	hth/abd-A/Ubx/Abd-B/Antp/pan/Mad/tup/Mef2/vvl/hb/sd/ey/exd/aop/pho/sv/CrebA/en	19		Male.marker.genes	GO:0007611	learning or memory	92/2449	166/12275	3.11057e-24	1.83207e-22	9.06109e-23	Btk29A/Tob/14-3-3zeta/Gad1/fabp/Sap47/nemy/klg/mGluR/CaMKII/Appl/Nrx-1/futsch/Rdl/aPKC/svr/Nmdar2/2mit/Tomosyn/DopEcR/drl/CG4612/Fas2/5-HT1A/Tbh/Galphas/Pp1-87B/CRMP/Adf1/w/CenG1A/dnc/Pka-C1/Dop2R/eag/lilli/Src64B/arr/Socs36E/Rbfox1/rad/Ptp10D/AGO1/Alk/FoxP/EcR/orb2/Ddc/vn/Phm/Rac1/Pka-R1/Ank2/pum/brp/mnb/Abl/gish/Oamb/G9a/Dop1R1/simj/kis/eas/pxb/Syn/Shal/Rgk1/kra/Sh/MCU/dikar/Mob2/CASK/Blos1/Sta…	92		Male.marker.genes	GO:0099503	secretory vesicle	43/2364	85/11938	1.95818e-10	2.06425e-09	1.07357e-09	VGAT/fwe/Gdi/Rab3/Frq2/RabX4/Rab11/7B2/wls/nSyb/Chc/Dap160/olf413/Tomosyn/unc-13-4A/cmpy/Tbh/Syx1A/Syx6/Syt12/Rim/CanB2/jeb/Sytbeta/VGlut/Syt4/CanB/Cadps/Syn/Cirl/unc-13/Atet/Syt1/Syt7/prt/Dop1R2/Rab27/Snap24/Rab35/Syngr/Eps-15/Rph/Syx7	43
Male.marker.genes	GO:0044769	ATPase activity, coupled to transmembrane movement of ions, rotational mechanism	25/2323	49/12127	5.23786e-07	6.91612e-06	4.65838e-06	ATPsynbeta/blw/sun/Vha26/ATPsynB/VhaAC45/Vha16-1/Vha68-1/VhaPPA1-1/CG31030/ATPsynG/ATPsynC/ATPsyndelta/ATPsyngamma/ATPsynD/ATPsynO/ATPsynE/Vha13/Vha36-1/VhaM9.7-b/Vha14-1/Vha44/Vha55/VhaSFD/VhaAC39-1	25		Male.marker.genes	GO:0050890	cognition	92/2449	166/12275	3.11057e-24	1.83207e-22	9.06109e-23	Btk29A/Tob/14-3-3zeta/Gad1/fabp/Sap47/nemy/klg/mGluR/CaMKII/Appl/Nrx-1/futsch/Rdl/aPKC/svr/Nmdar2/2mit/Tomosyn/DopEcR/drl/CG4612/Fas2/5-HT1A/Tbh/Galphas/Pp1-87B/CRMP/Adf1/w/CenG1A/dnc/Pka-C1/Dop2R/eag/lilli/Src64B/arr/Socs36E/Rbfox1/rad/Ptp10D/AGO1/Alk/FoxP/EcR/orb2/Ddc/vn/Phm/Rac1/Pka-R1/Ank2/pum/brp/mnb/Abl/gish/Oamb/G9a/Dop1R1/simj/kis/eas/pxb/Syn/Shal/Rgk1/kra/Sh/MCU/dikar/Mob2/CASK/Blos1/Sta…	92		Male.marker.genes	GO:0043195	terminal bouton	36/2364	66/11938	3.84246e-10	3.96793e-09	2.06362e-09	Cbp53E/cpx/sky/Rab11/Nrx-1/nSyb/Fas2/Syx1A/Prosap/kek6/Alk/jeb/ena/Magi/Ank2/Atg8a/pum/mnb/gukh/Snap25/Rop/Fak/Syn/VAChT/unc-13/CASK/dlg1/Syt1/Mical/prt/metro/Mob4/EndoA/alphaSnap/Pldn/Synd	36
Male.marker.genes	GO:0009055	electron transfer activity	31/2323	68/12127	5.94382e-07	7.55261e-06	5.08709e-06	SdhB/Su(P)/SdhC/Cyt-c1/UQCR-C2/UQCR-C1/COX5A/COX4/UQCR-14/Cyt-c-p/UQCR-Q/cype/COX5B/UQCR-6.4/COX8/COX7C/COX7A/CG7834/levy/RFeSP/ND-MLRQ/COX6B/ND-B17.2/SdhA/ND-75/ox/CG7430/Grx1/Fdx1/UQCR-11/CG14407	31		Male.marker.genes	GO:0007476	imaginal disc-derived wing morphogenesis	138/2449	306/12275	5.96269e-24	3.44166e-22	1.70219e-22	Btk29A/path/hth/tsh/zfh2/salr/tsr/app/bi/Bx/ct/ap/put/emc/sqh/ctp/Actbeta/wls/zip/shot/svr/GEFmeso/tok/Dg/ed/MYPT-75D/Hs3st-B/Galphao/sbb/mam/Galphas/dlp/CSN8/disco-r/Pka-C1/Dys/Mbs/S/pan/Gug/lola/arr/Dad/Socs36E/Rbfox1/tld/Mkp3/flw/bib/rho/Drak/corto/spen/nmo/dally/cg/crol/cic/sty/Mad/Smox/EcR/Gprk2/jing/vn/Phm/Rac1/heph/rhea/sfl/px/shn/PDZ-GEF/cv-2/fru/Hipk/sca/Hs6st/Src42A/caup/ara/mew/mthl1/k…	138		Male.marker.genes	GO:0048786	presynaptic active zone	21/2364	28/11938	4.38875e-10	4.44142e-09	2.30987e-09	cpx/Rab3/CaMKII/Bsg/Ten-a/nSyb/Rbp/Fas2/Nrx-IV/Syx1A/cac/Fife/Rim/brp/Gycbeta100B/RhoGAP100F/unc-13/stj/Liprin-alpha/Srpk79D/bchs	21
Male.marker.genes	GO:0008266	poly(U) RNA binding	10/2323	11/12127	5.95337e-07	7.55261e-06	5.08709e-06	Rbp6/fne/shep/CG4612/Hrb27C/ssx/Sxl/hfp/pAbp/elav	10		Male.marker.genes	GO:0070887	cellular response to chemical stimulus	173/2449	423/12275	7.74102e-24	4.38051e-22	2.16653e-22	DENR/Drat/Torsin/PyK/sesB/Blimp-1/Sod1/Ggamma30A/Nurf-38/put/Hsc70-4/Hr4/Akap200/Eip75B/BI-1/TyrR/Mmp2/Snoo/Calr/Cam/CG15814/Spp/Hsc70-3/Vha68-1/fra/CG11999/Lis-1/DopEcR/mAChR-A/drl/Oatp74D/Tl/cmpy/Eip93F/smt3/lwr/St3/ths/dlp/wit/Rheb/CG14184/eIF4A/br/Pka-C1/puc/tai/Src64B/AdipoR/Dad/tld/ftz-f1/DOR/Syt12/kek5/msi/Drl-2/dally/ttv/sty/Mad/Smox/EcR/Hr38/Sik3/Sirt1/Pdk1/Galphaq/Fer2/Sytbeta/Pde8/Syt4…	173		Male.marker.genes	GO:0005759	mitochondrial matrix	68/2364	171/11938	1.17598e-09	1.16675e-08	6.06799e-09	Idh3b/mRpL21/mRpL2/mRpL12/IscU/kdn/mRpS7/mRpL16/tko/UQCR-C2/UQCR-C1/CG11267/P5CDh1/slgA/Gabat/CG31075/mRpS10/Nc73EF/mRpS25/mRpL22/CG7834/Got1/mRpL27/mRpL44/Sod2/CG5214/CG3107/CG17691/Mdh2/Hsp60A/mRpL20/mRpL24/muc/CG7430/mRpL41/P32/mRpS24/mRpL52/mRpS6/mRpL55/mRpL30/mRpS16/CG7394/mRpS17/Gdh/mRpS35/mRpS26/mRpL47/mRpL51/mRpL17/mRpL36/CG14407/bonsai/mRpS11/mRpS28/mRpS34/mRpS23/PCB/mRpL14/mRpL28/mRpL9/…	68
Male.marker.genes	GO:0042802	identical protein binding	57/2323	160/12127	6.29825e-07	7.83648e-06	5.27829e-06	Tpi/dsx/14-3-3zeta/Sod1/Lac/Sep2/trsn/Oscillin/CadN/ctp/Ten-a/Dscam2/Ten-m/CadN2/drl/Meltrin/Dlc90F/corto/Ace/Dscam3/trx/Dscam1/lolal/otk/FoxP/bru3/Dscam4/Liprin-gamma/otk2/rdx/Atf6/Taf12/robo2/bun/rpr/MBD-like/mim/mod(mdg4)/GstO2/CtBP/Pak3/Syt1/da/Khc-73/psq/REPTOR-BP/Sep1/oc/Gsc/mirr/shg/wun/Gdh/pnut/Gyc88E/dbo/grim	57		Male.marker.genes	GO:0002181	cytoplasmic translation	79/2449	133/12275	1.28583e-23	7.13637e-22	3.52953e-22	DENR/MCTS1/CG6195/eIF4H1/RpS3A/RpS23/RpL19/eIF4E1/CG13364/eIF4A/RpL26/RpL15/RpS9/RpL36/RpL23/RpL31/orb/RpL12/RpL41/RpS6/RpS21/RpL28/RpS20/RpL39/RpL23A/RpS7/RpL32/RpL37A/RpLP0/orb2/RpL38/RpL29/RpL35/RpL5/RpLP1/RpL27/sta/RpS26/RpL8/RpS4/RpS12/RpS27/RpS29/RpS16/RpS8/RpS25/RpS15/RpL35A/RpL13/RpL7/RpL4/RpL18/RpL30/eIF3m/RpL7A/RpL36A/RpL11/RpS19a/RpL24/eIF1/CG8635/CG1578/eRF1/eIF2gamma/RpL14/RpS30/CG55…	79		Male.marker.genes	GO:0005700	polytene chromosome	79/2364	210/11938	1.22713e-09	1.19409e-08	6.21015e-09	lawc/abd-A/Ubx/Abd-B/Su(var)205/vig2/Hel25E/Hsp83/Nipped-A/Eip93F/mam/B52/Rm62/BEAF-32/Pp1-87B/Adf1/HP1c/His3.3B/Gug/tou/bab2/corto/Dsp1/trx/Smr/lolal/JIL-1/Hrb98DE/EcR/Psc/Parp/Trf2/Nlp/sqd/CycG/upSET/RpL11/E(Pc)/G9a/Moe/scf/His2Av/nej/MED26/CG8677/MBD-like/Su(Tpl)/Top1/HP4/D1/mod(mdg4)/CtBP/east/Pep/Utx/Mi-2/nsl1/cnc/Nipped-B/Ubi-p5E/CycT/Sin3A/His3.3A/spt4/pho/fkh/Hcs/CrebA/Tctp/vig/Mlf/Df31/Y…	79
Male.marker.genes	GO:0019900	kinase binding	39/2323	95/12127	6.4838e-07	7.91513e-06	5.33127e-06	Msp300/Nrx-1/futsch/mask/drl/Mob3/mats/Mbs/alc/crb/pan/Lk6/Cks85A/Rac1/Atg8a/CycG/spri/yki/Tm1/Atg17/RhoBTB/hep/Mob2/csw/arm/CG17514/Rab21/Aplip1/syd/Mob4/CycJ/Rho1/Pi3K21B/ref(2)P/Axn/Rack1/Mitofilin/dome/dock	39		Male.marker.genes	GO:0007472	wing disc morphogenesis	140/2449	316/12275	2.28429e-23	1.24386e-21	6.15193e-22	Btk29A/path/hth/tsh/zfh2/salr/tsr/app/bi/Bx/ct/ap/put/emc/sqh/ctp/Actbeta/wls/zip/shot/svr/GEFmeso/tok/Dg/ed/MYPT-75D/Hs3st-B/Galphao/sbb/mam/Galphas/dlp/CSN8/disco-r/Pka-C1/Dys/Mbs/S/pan/Gug/lola/arr/Dad/Socs36E/Rbfox1/tld/Mkp3/flw/bib/rho/Drak/corto/spen/nmo/dally/cg/crol/cic/sty/Mad/Smox/EcR/Gprk2/jing/vn/Phm/Rac1/heph/rhea/sfl/px/shn/PDZ-GEF/cv-2/fru/Hipk/sca/Hs6st/Src42A/caup/ara/mew/mthl1/k…	140		Male.marker.genes	GO:0034702	ion channel complex	41/2364	83/11938	1.30885e-09	1.24958e-08	6.49877e-09	Ca-alpha1T/nAChRbeta2/nAChRalpha2/CG4587/Ca-alpha1D/para/Nmdar2/nAChRalpha3/GluRIB/GluRIA/Shawl/nAChRalpha6/nAChRalpha7/Prosap/cac/eag/NaCP60E/CG42260/Hk/Cngl/nAChRalpha1/Neto/nAChRalpha5/Shaw/Trpgamma/Trpm/Shab/EMRE/Shal/Sh/nAChRbeta1/MCU/unc80/dlg1/KCNQ/scrib/Ca-beta/Elk/nAChRalpha4/Nmdar1/RyR	41
Male.marker.genes	GO:0035326	enhancer binding	20/2323	35/12127	6.78269e-07	8.12666e-06	5.47375e-06	hth/abd-A/Ubx/Abd-B/Antp/pan/Mad/tup/Mef2/vvl/hb/sd/ey/exd/aop/pho/sv/CrebA/en/klu	20		Male.marker.genes	GO:0023057	negative regulation of signaling	147/2449	342/12275	6.8364e-23	3.65368e-21	1.80705e-21	cpx/chrb/CG9650/wry/sky/CG10257/Hr4/pyd/RapGAP1/BI-1/Mmp2/Snoo/Cam/Rdl/Cow/Bili/nkd/Dap160/rho-5/Gbeta13F/ed/GABA-B-R2/Tl/Fas2/cmpy/Nca/lwr/cdi/Rheb/SoxN/eIF4A/qvr/dnc/CG32683/Pka-C1/Nlg2/crb/Gug/puc/numb/LRR/Dad/Socs36E/Mkp3/flw/kek5/Rala/nmo/Ptp10D/dally/Smr/kek1/Alk/crol/CG42684/Gprk1/otk/phyl/sty/jeb/Sik3/dysc/Gprk2/Galphaq/NFAT/Ank2/pum/mnb/CycG/Apc/Sesn/rdx/Pli/Hipk/Src42A/CG15537/ATPsynD/A…	147		Male.marker.genes	GO:0070382	exocytic vesicle	36/2364	69/11938	1.96419e-09	1.84052e-08	9.57206e-09	VGAT/fwe/Gdi/Rab3/Frq2/RabX4/wls/nSyb/Dap160/Tomosyn/unc-13-4A/Syx1A/Syx6/Syt12/Rim/CanB2/jeb/Sytbeta/VGlut/Syt4/CanB/Cadps/Syn/Cirl/unc-13/Atet/Syt1/Syt7/prt/Dop1R2/Rab27/Rab35/Syngr/Eps-15/Rph/Syx7	36
Male.marker.genes	GO:0003730	mRNA 3'-UTR binding	21/2323	38/12127	7.62546e-07	8.97032e-06	6.04199e-06	Imp/bru1/rump/shep/Unr/CG4612/Rbfox1/D/orb/bol/orb2/Hrb27C/brat/ssx/heph/pum/sqd/CG9705/Sxl/pAbp/apt	21		Male.marker.genes	GO:0007167	enzyme linked receptor protein signaling pathway	122/2449	263/12275	1.35392e-22	7.1044e-21	3.51372e-21	DENR/14-3-3zeta/Pvf3/put/Mmp2/Snoo/Actbeta/fra/Socs16D/rho-5/tok/mask/Lis-1/ed/drl/Nrk/Tl/Fas2/cmpy/smal/cdi/ths/dlp/wit/Rheb/eIF4A/S/Gug/Src64B/Ephrin/Dad/Socs36E/tld/Mkp3/rho/kek5/mbc/Drl-2/spen/Ptp10D/dally/kek1/Alk/ttv/phyl/cic/sty/Mad/Smox/Sik3/Pdk1/vn/Rac1/poly/Ret/pum/sfl/CycG/spg/shn/Ddr/cv-2/Src42A/PVRAP/sima/Akt1/Dab/gro/Smurf/CG31183/bnl/mav/hep/Roc1a/sxc/tay/wrd/dlg1/csw/Ptpmeg/Reph/h…	122		Male.marker.genes	GO:0045211	postsynaptic membrane	28/2364	47/11938	2.328e-09	2.14176e-08	1.11387e-08	nAChRbeta2/nAChRalpha2/CaMKII/Cals/wls/Ten-m/nAChRalpha3/Fas2/veli/nAChRalpha6/nAChRalpha7/Nlg2/Prosap/inaE/nAChRalpha1/Syt4/nAChRalpha5/nAChRbeta1/slo/unc-13/CG11155/dlg1/Drep2/scrib/shi/nAChRalpha4/Nmdar1/Synd	28
Male.marker.genes	GO:0000976	transcription regulatory region sequence-specific DNA binding	99/2323	329/12127	9.07109e-07	1.04803e-05	7.05908e-06	hth/abd-A/Ubx/Abd-B/Antp/dsx/Blimp-1/zfh2/salr/Lim1/bi/ct/toy/ap/Hr4/Eip75B/nonA/scro/CG43689/disco/dmrt99B/br/pan/ftz-f1/CG9932/CG12605/Hr3/cic/Mad/EcR/Hr38/kay/NK7.1/Atf3/Trf2/NFAT/Xbp1/TfAP-2/tup/Mef2/vvl/CG10543/drm/odd/CG32532/Rx/grn/mid/Pdp1/Drgx/hb/Optix/sd/Stat92E/CG32767/CHES-1-like/da/Utx/foxo/B-H1/B-H2/sim/ey/Hr51/Dif/CG12769/Lim3/PHDP/Ptx1/exd/rn/Pur-alpha/Gsc/dve/zfh1/aop/pho/sv/fkh/…	99		Male.marker.genes	GO:0010648	negative regulation of cell communication	146/2449	341/12275	1.52768e-22	7.87298e-21	3.89385e-21	cpx/chrb/CG9650/wry/sky/CG10257/Hr4/pyd/RapGAP1/BI-1/Mmp2/Snoo/Cam/Rdl/Cow/Bili/nkd/Dap160/rho-5/Gbeta13F/ed/GABA-B-R2/Tl/Fas2/cmpy/Nca/lwr/cdi/Rheb/SoxN/eIF4A/qvr/dnc/CG32683/Pka-C1/Nlg2/crb/Gug/puc/numb/LRR/Dad/Socs36E/Mkp3/flw/kek5/Rala/nmo/Ptp10D/dally/Smr/kek1/Alk/crol/CG42684/Gprk1/otk/phyl/sty/jeb/Sik3/dysc/Gprk2/Galphaq/NFAT/Ank2/pum/mnb/CycG/Apc/Sesn/rdx/Pli/Hipk/Src42A/CG15537/ATPsynD/A…	146		Male.marker.genes	GO:0000314	organellar small ribosomal subunit	22/2364	32/11938	2.51497e-09	2.23258e-08	1.16111e-08	mRpL12/mRpS7/tko/mRpS10/mRpS25/mRpS24/mRpS6/mRpS16/mRpS17/mRpS35/mRpS26/bonsai/mRpS11/mRpS28/mRpS34/mRpS23/mRpS21/mRpS18A/mRpS2/mRpS22/mRpL3/mRpS33	22
Male.marker.genes	GO:1990837	sequence-specific double-stranded DNA binding	106/2323	359/12127	1.02487e-06	1.16332e-05	7.83557e-06	hth/abd-A/Ubx/Abd-B/Antp/dsx/Blimp-1/zfh2/salr/Lim1/bi/ct/toy/ap/HmgD/Hr4/Eip75B/Su(var)205/nonA/scro/CG43689/disco/dmrt99B/br/pan/ftz-f1/bab1/bab2/CG9932/CG12605/Hr3/cic/Mad/EcR/Hr38/kay/NK7.1/Atf3/Trf2/NFAT/sqd/Xbp1/TfAP-2/tup/Mef2/vvl/CG10543/drm/odd/CG32532/Rx/grn/mid/Pdp1/Drgx/hb/Optix/D1/Xrp1/sd/Stat92E/CG32767/CHES-1-like/da/Utx/foxo/B-H1/B-H2/sim/ey/Hr51/Dif/CG12769/Lim3/PHDP/Ptx1/exd/rn/…	106		Male.marker.genes	GO:0008045	motor neuron axon guidance	53/2449	73/12275	3.00727e-22	1.51704e-20	7.50305e-21	Wnt4/Mp/fend/beat-Vc/Ptp99A/trn/Lar/beat-VI/caps/Mmp2/Sdc/Ten-a/PlexA/Nrg/fra/Ten-m/beat-Ic/tok/beat-IIb/beat-Va/Sema1a/robo1/Fas2/fz2/Oli/side/ko/beat-Ib/beat-IIa/beat-Ia/beat-IIIc/Drl-2/Ptp10D/dally/Rac1/NetB/Abl/tup/vvl/Dab/grn/PlexB/spz5/Lim3/Sulf1/Cdk5alpha/zfh1/Ptp69D/trol/haf/beat-Vb/Rho1/Ptp4E	53		Male.marker.genes	GO:0005763	mitochondrial small ribosomal subunit	22/2364	32/11938	2.51497e-09	2.23258e-08	1.16111e-08	mRpL12/mRpS7/tko/mRpS10/mRpS25/mRpS24/mRpS6/mRpS16/mRpS17/mRpS35/mRpS26/bonsai/mRpS11/mRpS28/mRpS34/mRpS23/mRpS21/mRpS18A/mRpS2/mRpS22/mRpL3/mRpS33	22
Male.marker.genes	GO:0015078	proton transmembrane transporter activity	43/2323	111/12127	1.17002e-06	1.30517e-05	8.79104e-06	ATPsynbeta/COX5A/COX4/VGAT/blw/ATPsynCF6/cype/sun/COX5B/Vha26/SPoCk/ATPsynB/COX8/COX7C/VhaAC45/Vha16-1/Nhe3/Vha68-1/VhaPPA1-1/SERCA/COX7A/CG31030/CG10960/ATPsynG/levy/ATPsynC/ATPsyndelta/ND-MLRQ/ATPsyngamma/COX6B/ATPsynD/ATPsynO/ATPsynE/VhaM9.7-a/Vha13/Vha36-1/VhaM9.7-b/Vha14-1/Vha44/Vha55/VhaSFD/VhaAC39-1/Nhe2	43		Male.marker.genes	GO:0050767	regulation of neurogenesis	122/2449	265/12275	3.0488e-22	1.51704e-20	7.50305e-21	Rtca/hth/COX5A/COX4/UQCR-14/Imp/Antp/COX7C/hdc/Trim9/ham/CG10257/Lar/emc/CadN/ctp/PlexA/tutl/Actbeta/pros/fra/aPKC/shot/Dap160/Lis-1/ed/Hs3st-B/Sema1a/Sar1/robo1/Dhc64C/Fas2/cdi/stan/Rheb/Adf1/nudC/SoxN/Prosap/Mbs/kuz/numb/Src64B/tinc/Dlic/Socs36E/erm/Dscam1/Alk/sty/CG34401/Smox/EcR/brat/DAAM/CG7834/Rac1/sdk/Ret/NetB/mnb/spg/Abl/PDZ-GEF/G9a/Src42A/yki/vvl/CG5214/Rop/trio/bun/osa/Akt1/Dab/bif/chic…	122		Male.marker.genes	GO:0022627	cytosolic small ribosomal subunit	27/2364	45/11938	3.61511e-09	3.15387e-08	1.64025e-08	MCTS1/RpS3A/RpS23/RpS9/RpS6/RpS21/RpS20/RpS7/sta/RpS26/RpS4/RpS12/RpS27/RpS29/RpS16/RpS8/RpS25/RpS15/RpS19a/RpS30/RpS28b/LTV1/RpS14a/Rack1/RpS13/RpS15Aa/RpS24	27
Male.marker.genes	GO:0005267	potassium channel activity	21/2323	39/12127	1.35462e-06	1.48549e-05	1.00056e-05	CG42594/CG1688/GluRIA/Shawl/CG42340/Task7/Ih/eag/Hk/SK/Shaw/Shab/Shal/SLO2/Sh/slo/CG11155/KCNQ/CG43155/Task6/Elk	21		Male.marker.genes	GO:0098609	cell-cell adhesion	75/2449	128/12275	5.5772e-22	2.7281e-20	1.34927e-20	Cad87A/beat-Vc/beat-IIIb/hbs/klg/Fas3/p120ctn/Lar/pyd/beat-VI/Lac/caps/glec/beat-IV/Cont/CadN/Cals/Bsg/Ten-a/tutl/Dscam2/Nrg/Con/CG7166/sli/Ten-m/beat-Ic/Nlg4/beat-IIb/beat-Va/CadN2/ed/robo1/sns/Fas1/beat-VII/Fas2/stan/disco-r/beat-Ib/Nlg2/CG44153/kug/Src64B/beat-IIa/Mkp3/bib/rho/beat-Ia/beat-IIIc/Nlg3/Dscam3/sdk/rhea/Dscam4/rst/kirre/Src42A/robo2/mew/fz/dlg1/wech/arm/scrib/Rab4/stck/rk/aop/shg/b…	75		Male.marker.genes	GO:0098588	bounding membrane of organelle	109/2364	331/11938	7.9046e-09	6.7792e-08	3.52569e-08	gammaSnap1/Tom7/CG8004/porin/VGAT/CG32225/fwe/Msp300/Tom20/Vha26/SPoCk/ct/Mgstl/Rab11/PMP34/Vps24/Efa6/wls/CG5021/CG15814/Vha68-1/Chc/Lamp1/olf413/Sar1/Sec61alpha/SERCA/Sec61beta/Tbh/CG5059/CG14184/w/klar/S/Syx6/CG5065/rho/nuf/Fur1/siz/shrb/CG1275/VGlut/Atg8a/RpS26/GlcAT-S/Chmp1/GlcAT-P/bif/alpha-Man-Ia/Syn/VAChT/CG11077/rpr/unc-13/Atet/Fis1/Sur-8/Vps20/Tom40/BicD/Syt1/alpha-Man-IIb/lqf/prt/Dop1R…	109
Male.marker.genes	GO:0042803	protein homodimerization activity	51/2323	141/12127	1.43831e-06	1.55098e-05	1.04467e-05	Tpi/dsx/14-3-3zeta/Sod1/Lac/Sep2/trsn/CadN/ctp/Ten-a/Ten-m/CadN2/drl/Dlc90F/corto/Ace/trx/Dscam1/lolal/otk/FoxP/bru3/Liprin-gamma/otk2/rdx/Atf6/Taf12/robo2/bun/rpr/MBD-like/mim/mod(mdg4)/GstO2/CtBP/Pak3/Syt1/da/Khc-73/psq/REPTOR-BP/Sep1/oc/Gsc/mirr/shg/wun/pnut/Gyc88E/dbo/grim	51		Male.marker.genes	GO:0048511	rhythmic process	85/2449	156/12275	8.02748e-22	3.86122e-20	1.90969e-20	unc79/Gabat/Bx/emc/Akap200/CkIIalpha/trsn/Hsp83/Rdl/Fer2LCH/rho-5/robo1/5-HT1A/Nca/disco/Ih/qvr/dnc/Pka-C1/Mbs/norpA/numb/Hk/eys/hid/EcR/Sik3/kay/dysc/Mid1/tara/wake/Fer2/nvy/Rac1/sNPF/Ac78C/Dh31/Plc21C/mnb/Oamb/TfAP-2/Mef2/5-HT1B/Shab/nej/Akt1/Ac3/Pdp1/B4/Acer/Sh/slo/ctrip/sxc/CkIIbeta/unc80/dlg1/Adar/foxo/Nipped-B/Hr51/Pka-R2/rut/Dop1R2/dco/InR/dod/mld/tim/Rh7/Rho1/lid/tyf/NPF/Ets96B/Pdfr/Dh44/…	85		Male.marker.genes	GO:0005912	adherens junction	44/2364	97/11938	9.55516e-09	7.92608e-08	4.12216e-08	hbs/p120ctn/Lar/pyd/sqh/Efa6/shot/CadN2/ed/smal/sdt/RASSF8/kug/LRR/bib/yrt/ena/Magi/rhea/rst/Abl/kirre/PDZ-GEF/Moe/Src42A/mew/Fak/Kank/wech/arm/Dl/ckn/scrib/wts/Swip-1/Pax/stck/cno/shg/ASPP/baz/Liprin-alpha/Arf51F/kon	44
Male.marker.genes	GO:0016301	kinase activity	104/2323	355/12127	1.92807e-06	2.04502e-05	1.37743e-05	Dak1/Btk29A/Pgk/rdgA/Argk/put/bma/CkIIalpha/Tlk/PIP4K/CaMKI/CaMKII/aPKC/Nrk/CG4546/awd/sdt/cdi/PKD/wit/msn/Pka-C1/alc/Eip63E/Src64B/Dgk/CG2201/Lk6/Drak/nmo/Alk/Gprk1/JIL-1/otk/Gk2/Sik3/Hex-A/Dyrk2/Gprk2/Pdk1/CG31140/Pkc53E/Ret/CG34384/mnb/CycG/Csk/sff/Abl/Ddr/Hipk/gish/Src42A/grp/Atg1/Strn-Mlck/trio/eas/Akt1/Fak/CG4629/PhKgamma/CG10082/hep/CkIIbeta/CASK/dlg1/Slob/fwd/Pak3/hppy/Pka-C3/Pkc98E/SRPK/…	104		Male.marker.genes	GO:0007623	circadian rhythm	84/2449	154/12275	1.27496e-21	6.03205e-20	2.98335e-20	unc79/Gabat/Bx/emc/Akap200/CkIIalpha/trsn/Hsp83/Rdl/Fer2LCH/rho-5/robo1/5-HT1A/Nca/disco/Ih/qvr/dnc/Pka-C1/Mbs/norpA/Hk/eys/hid/EcR/Sik3/kay/dysc/Mid1/tara/wake/Fer2/nvy/Rac1/sNPF/Ac78C/Dh31/Plc21C/mnb/Oamb/TfAP-2/Mef2/5-HT1B/Shab/nej/Akt1/Ac3/Pdp1/B4/Acer/Sh/slo/ctrip/sxc/CkIIbeta/unc80/dlg1/Adar/foxo/Nipped-B/Hr51/Pka-R2/rut/Dop1R2/dco/InR/dod/mld/tim/Rh7/Rho1/lid/tyf/NPF/Ets96B/Pdfr/Dh44/Bdbt/…	84		Male.marker.genes	GO:0070161	anchoring junction	44/2364	97/11938	9.55516e-09	7.92608e-08	4.12216e-08	hbs/p120ctn/Lar/pyd/sqh/Efa6/shot/CadN2/ed/smal/sdt/RASSF8/kug/LRR/bib/yrt/ena/Magi/rhea/rst/Abl/kirre/PDZ-GEF/Moe/Src42A/mew/Fak/Kank/wech/arm/Dl/ckn/scrib/wts/Swip-1/Pax/stck/cno/shg/ASPP/baz/Liprin-alpha/Arf51F/kon	44
Male.marker.genes	GO:0019904	protein domain specific binding	33/2323	78/12127	2.08734e-06	2.17824e-05	1.46716e-05	Ubx/14-3-3zeta/14-3-3epsilon/Lar/Hsp83/fra/nkd/Tl/fz2/CG12384/Dys/cindr/hid/Rala/lolal/ena/rst/pico/gro/mim/mod(mdg4)/sd/Nedd4/bip2/psq/comm/e(y)2/Ctr9/aop/fkh/Ubc6/cno/Nak	33		Male.marker.genes	GO:0007528	neuromuscular junction development	91/2449	175/12275	2.17533e-21	1.01258e-19	5.00806e-20	Imp/sesB/Gad1/cpx/nwk/Syp/put/Lar/mGluR/Frq2/Atpalpha/CaMKII/Nrx-1/Sdc/futsch/Ten-a/drpr/Ten-m/DIP-gamma/Galphao/dpr11/Fas2/stai/cmpy/Syn1/veli/Galphas/Smn/dlp/wit/Rheb/Octbeta2R/Nlg2/Prosap/cac/Src64B/Dad/Nlg3/nmo/Mad/jeb/kay/dysc/plum/brat/Neto/ena/Pdk1/Octbeta1R/Ank2/pum/Liprin-gamma/mnb/sff/Abl/Src42A/simj/Atg1/kis/trio/Akt1/Fak/Syn/mav/slo/unc-13/C1GalTA/Mob2/wrd/CASK/dlg1/unc-104/stj/Nedd4/…	91		Male.marker.genes	GO:0043235	receptor complex	38/2364	79/11938	1.33684e-08	1.09104e-07	5.67421e-08	GABA-B-R3/nAChRbeta2/put/nAChRalpha2/mGluR/PlexA/Nmdar2/GABA-B-R2/drl/GABA-B-R1/nAChRalpha3/Nrk/GluRIB/GluRIA/wit/nAChRalpha6/nAChRalpha7/Prosap/Drl-2/Alk/EcR/nAChRalpha1/Neto/Ret/nAChRalpha5/Ddr/mew/nAChRbeta1/PlexB/Lcch3/dlg1/scrib/InR/CG3277/Pvr/nAChRalpha4/Nmdar1/tkv	38
Male.marker.genes	GO:0008135	translation factor activity, RNA binding	32/2323	75/12127	2.37978e-06	2.444e-05	1.64616e-05	eEF1alpha1/DENR/eIF4G1/eIF4H1/eIF4G2/eIF4E1/eEF1delta/eIF4A/eIF4EHP/orb/eEF5/orb2/eIF3m/eIF3g1/eIF1A/eIF1/mEFTu1/eIF5B/eRF1/eIF3e/eIF2gamma/eIF3l/eIF3h/eEF2/eIF3f1/eIF3d1/eEF1gamma/eIF3b/NAT1/eIF3i/eIF3a/mxt	32		Male.marker.genes	GO:0016477	cell migration	137/2449	321/12275	4.60929e-21	2.11149e-19	1.04431e-19	abd-A/Abd-B/Wnt4/Msp300/tsr/sosie/14-3-3epsilon/trn/Pvf3/Lar/caps/Mmp2/Rab11/sqh/Arpc5/CSN5/Sdc/PlexA/faf/zip/fra/sli/Invadolysin/Lis-1/Gbeta13F/Sema1a/robo1/Dhc64C/stai/fz2/awd/qm/veli/lwr/Ostgamma/ths/Diap1/dlp/kuz/puc/numb/kug/tai/Dad/Socs36E/cindr/Rala/mbc/dally/trx/Dscam1/Evi5/ttv/EcR/jeb/kay/Hrb27C/ena/jing/vn/Rac1/sr/rhea/NetB/pum/sfl/sqd/Csk/Apc/Abl/spri/PDZ-GEF/Cortactin/gish/18w/chb/Src…	137		Male.marker.genes	GO:1902495	transmembrane transporter complex	44/2364	98/11938	1.40467e-08	1.1282e-07	5.86747e-08	nrv3/Ca-alpha1T/nAChRbeta2/nAChRalpha2/nrv2/Atpalpha/CG4587/Ca-alpha1D/para/Nmdar2/nAChRalpha3/GluRIB/GluRIA/Shawl/nAChRalpha6/nAChRalpha7/Prosap/cac/eag/NaCP60E/CG42260/Hk/Cngl/nAChRalpha1/Neto/nAChRalpha5/Shaw/Trpgamma/Trpm/Shab/EMRE/Shal/Sh/nAChRbeta1/MCU/unc80/dlg1/KCNQ/scrib/Ca-beta/Elk/nAChRalpha4/Nmdar1/RyR	44
Male.marker.genes	GO:0004112	cyclic-nucleotide phosphodiesterase activity	9/2323	10/12127	2.83999e-06	2.7425e-05	1.84722e-05	Pde6/dnc/Pde1c/Pde11/Pde8/Pka-R1/Pde9/Pka-R2/PrBP	9		Male.marker.genes	GO:0007186	G protein-coupled receptor signaling pathway	106/2449	222/12275	5.64736e-21	2.54661e-19	1.25951e-19	sun/Ggamma30A/CG13579/rdgA/AstC-R1/GABA-B-R3/AstC-R2/mGluR/TyrR/7B2/Cam/FMRFaR/RSG7/Gbeta13F/DopEcR/GABA-B-R2/mAChR-A/GABA-B-R1/Galphao/Gycalpha99B/5-HT1A/Oct-TyrR/Tbh/Galphas/stan/AstA-R1/CG12290/Pka-C1/Octbeta2R/CG43795/Dop2R/inaE/norpA/TrissinR/Dgk/AstC/Tk/TkR86C/Octbeta3R/CCKLR-17D3/CG31140/Galphaq/Nplp1/Dh31-R/Octbeta1R/CG31760/sNPF/CG13995/5-HT7/Ac78C/Dh31/CG34384/CCAP-R/ktub/mtt/Oamb/Dop1R…	106		Male.marker.genes	GO:0008021	synaptic vesicle	33/2364	65/11938	2.2356e-08	1.76752e-07	9.19242e-08	VGAT/fwe/Gdi/Rab3/Frq2/RabX4/wls/nSyb/Dap160/Tomosyn/unc-13-4A/Syx1A/Syx6/Rim/CanB2/jeb/Sytbeta/VGlut/Syt4/CanB/Cadps/Syn/Cirl/unc-13/Syt1/Syt7/prt/Dop1R2/Rab27/Syngr/Eps-15/Rph/Syx7	33
Male.marker.genes	GO:0022848	acetylcholine-gated cation-selective channel activity	9/2323	10/12127	2.83999e-06	2.7425e-05	1.84722e-05	nAChRbeta2/nAChRalpha2/nAChRalpha3/nAChRalpha6/nAChRalpha7/nAChRalpha1/nAChRalpha5/nAChRbeta1/nAChRalpha4	9		Male.marker.genes	GO:0046530	photoreceptor cell differentiation	102/2449	210/12275	6.34849e-21	2.81873e-19	1.3941e-19	hth/mbl/tsr/hbs/klg/Lar/emc/noc/Rab11/elB/CSN5/CadN/Cam/Bsg/tutl/pros/cnn/Ten-m/rin/EMC3/SP2353/CadN2/mask/Lis-1/ed/Nrk/sdt/cdi/stan/CSN8/CSN4/klar/msn/br/Mbs/S/crb/lola/lilli/Src64B/vimar/tinc/Socs36E/eys/rho/Rala/msi/Alk/phyl/sty/yrt/EcR/jeb/kay/dysc/Rac1/sdk/tau/spg/PDZ-GEF/Moe/Src42A/RhoGAP100F/nej/bun/osa/Dab/dac/salm/Optix/fz/Rab6/sno/Mob2/csw/RasGAP1/B-H1/B-H2/arm/ey/pAbp/scrib/wts/AP-1sig…	102		Male.marker.genes	GO:0098805	whole membrane	86/2364	249/11938	2.67774e-08	2.08452e-07	1.08411e-07	gammaSnap1/Tom7/CG8004/porin/VGAT/CG32225/fwe/Msp300/Tom20/Vha26/mGluR/Mgstl/Rab11/PMP34/Vps24/wls/Vha68-1/Chc/Lamp1/olf413/Sar1/Flo1/Tbh/CG5059/CG14184/klar/S/Syx6/CG5065/rho/nuf/shrb/CG1275/VGlut/Atg8a/Flo2/Chmp1/Atg17/Syn/VAChT/CG11077/rpr/unc-13/Atet/Fis1/Vps20/Tom40/BicD/Syt1/lqf/prt/Dop1R2/comm/AP-1sigma/Snap24/Rab35/Vha13/AP-2sigma/Vha36-1/Vha14-1/mge/Vha44/Vha55/Syngr/Vta1/CG5946/VhaSFD/R…	86
Male.marker.genes	GO:0098631	cell adhesion mediator activity	9/2323	10/12127	2.83999e-06	2.7425e-05	1.84722e-05	Cont/Bsg/tutl/Dscam2/Fas2/CG44153/Dscam3/Dscam4/ImpL2	9		Male.marker.genes	GO:0022610	biological adhesion	103/2449	214/12275	9.65865e-21	4.22346e-19	2.08886e-19	CG5758/Cad87A/Mp/beat-Vc/beat-IIIb/hbs/klg/mspo/trn/Fas3/p120ctn/Lar/pyd/beat-VI/plx/Lac/nrv2/caps/glec/beat-IV/Cont/CadN/Cals/Bsg/Ten-a/PlexA/tutl/Dscam2/Nrg/Con/CG7166/sli/Ten-m/Chc/Invadolysin/beat-Ic/Nlg4/beat-IIb/beat-Va/CadN2/Gbeta13F/ed/robo1/sns/Galphao/Fas1/beat-VII/Fas2/Nrx-IV/Arpc4/stan/Arpc1/disco-r/beat-Ib/Nlg2/CG44153/kug/Src64B/beat-IIa/Mkp3/bib/rho/beat-Ia/beat-IIIc/Nlg3/Ccn/Dscam…	103		Male.marker.genes	GO:0012506	vesicle membrane	33/2364	68/11938	9.13275e-08	7.00178e-07	3.64145e-07	VGAT/fwe/Rab11/wls/Chc/olf413/Sar1/Nos/Tbh/Syx6/VGlut/Syn/VAChT/unc-13/Atet/BicD/Syt1/lqf/prt/Dop1R2/Cip4/AP-1sigma/Snap24/AP-2sigma/Syngr/CG5946/Rph/CG9132/Afti/AP-2mu/Sec22/RyR/Sec16	33
Male.marker.genes	GO:0098632	cell-cell adhesion mediator activity	9/2323	10/12127	2.83999e-06	2.7425e-05	1.84722e-05	Cont/Bsg/tutl/Dscam2/Fas2/CG44153/Dscam3/Dscam4/ImpL2	9		Male.marker.genes	GO:0007155	cell adhesion	102/2449	211/12275	9.92973e-21	4.27719e-19	2.11543e-19	CG5758/Cad87A/Mp/beat-Vc/beat-IIIb/hbs/klg/mspo/trn/Fas3/p120ctn/Lar/pyd/beat-VI/plx/Lac/nrv2/caps/glec/beat-IV/Cont/CadN/Cals/Bsg/Ten-a/PlexA/tutl/Dscam2/Nrg/Con/CG7166/sli/Ten-m/Invadolysin/beat-Ic/Nlg4/beat-IIb/beat-Va/CadN2/Gbeta13F/ed/robo1/sns/Galphao/Fas1/beat-VII/Fas2/Nrx-IV/Arpc4/stan/Arpc1/disco-r/beat-Ib/Nlg2/CG44153/kug/Src64B/beat-IIa/Mkp3/bib/rho/beat-Ia/beat-IIIc/Nlg3/Ccn/Dscam3/cr…	102		Male.marker.genes	GO:0030659	cytoplasmic vesicle membrane	31/2364	62/11938	9.37555e-08	7.08064e-07	3.68246e-07	VGAT/fwe/Rab11/wls/Chc/olf413/Sar1/Tbh/Syx6/VGlut/Syn/VAChT/unc-13/Atet/BicD/Syt1/lqf/prt/Dop1R2/AP-1sigma/Snap24/AP-2sigma/Syngr/CG5946/Rph/CG9132/Afti/AP-2mu/Sec22/RyR/Sec16	31
Male.marker.genes	GO:0003712	transcription coregulator activity	52/2323	148/12127	3.09181e-06	2.94177e-05	1.98144e-05	Tob/Ssb-c31a/emc/CG5446/Eip75B/MED7/CG17202/Nipped-A/sbb/mam/Taf11/tna/Gug/tai/DOR/Smr/Mad/EcR/Sirt1/TfIIA-S/mnb/shn/yki/skd/nej/MED26/gro/acj6/MBD-like/Bgb/Bin1/NC2beta/MED22/MED10/CtBP/H/arm/Sin3A/mbf1/exd/e(y)2/MED28/Pax/Mrtf/CG13293/CG13287/Lpin/MED4/akirin/CG32971/CG13204/CG10555	52		Male.marker.genes	GO:0007417	central nervous system development	124/2449	282/12275	1.76116e-20	7.47455e-19	3.69679e-19	hth/Antp/tsr/ct/toy/ap/chinmo/Nrt/cib/Mmp2/noc/Appl/Ten-a/Actbeta/pros/Nrg/cnn/shot/Invadolysin/Lis-1/drl/Galphao/Dhc64C/Frl/Fas2/smt3/mam/robo3/SmD3/Smn/stan/wit/disco/lov/SoxN/Prosap/kuz/numb/Src64B/Ephrin/ftz-f1/D/rho/erm/mbc/Ptp10D/Dscam1/Hr3/siz/Mad/Smox/EcR/Psc/brat/jing/DAAM/vn/Rac1/Pka-R1/sr/spg/Apc/Abl/fru/nolo/18w/dati/dan/danr/robo2/vvl/trio/bun/eas/Dmtn/dac/chic/mid/hb/rpr/ab/PsGEF/C1…	124		Male.marker.genes	GO:1990351	transporter complex	45/2364	107/11938	1.07277e-07	7.98267e-07	4.15159e-07	CG34132/nrv3/Ca-alpha1T/nAChRbeta2/nAChRalpha2/nrv2/Atpalpha/CG4587/Ca-alpha1D/para/Nmdar2/nAChRalpha3/GluRIB/GluRIA/Shawl/nAChRalpha6/nAChRalpha7/Prosap/cac/eag/NaCP60E/CG42260/Hk/Cngl/nAChRalpha1/Neto/nAChRalpha5/Shaw/Trpgamma/Trpm/Shab/EMRE/Shal/Sh/nAChRbeta1/MCU/unc80/dlg1/KCNQ/scrib/Ca-beta/Elk/nAChRalpha4/Nmdar1/RyR	45
Male.marker.genes	GO:0046933	proton-transporting ATP synthase activity, rotational mechanism	13/2323	19/12127	3.8476e-06	3.60782e-05	2.43006e-05	ATPsynbeta/blw/sun/ATPsynB/VhaAC45/CG31030/ATPsynG/ATPsynC/ATPsyndelta/ATPsyngamma/ATPsynD/ATPsynO/ATPsynE	13		Male.marker.genes	GO:0071310	cellular response to organic substance	134/2449	317/12275	3.53076e-20	1.47678e-18	7.30391e-19	DENR/Drat/Torsin/PyK/Blimp-1/Nurf-38/put/Hsc70-4/Hr4/Akap200/Eip75B/BI-1/TyrR/Mmp2/Snoo/Calr/Cam/CG15814/Spp/Hsc70-3/fra/CG11999/Lis-1/DopEcR/mAChR-A/Oatp74D/Tl/cmpy/smt3/lwr/ths/dlp/wit/Rheb/CG14184/eIF4A/br/Pka-C1/tai/Src64B/AdipoR/Dad/tld/ftz-f1/DOR/kek5/dally/ttv/sty/Mad/Smox/EcR/Hr38/Sik3/Sirt1/Pdk1/poly/sfl/CycG/Crtc/Sesn/shn/rdx/cv-2/G9a/Dop1R1/Xbp1/CG15537/mAChR-B/Dh44-R2/sima/Akt1/gro/Sm…	134		Male.marker.genes	GO:0033178	proton-transporting two-sector ATPase complex, catalytic domain	16/2364	22/11938	1.17334e-07	8.60447e-07	4.47497e-07	ATPsynbeta/blw/ATPsynCF6/sun/Vha26/VhaAC45/Vha68-1/CG31030/ATPsyndelta/ATPsyngamma/ATPsynO/Vha36-1/Vha14-1/Vha44/Vha55/VhaSFD	16
Male.marker.genes	GO:0015405	P-P-bond-hydrolysis-driven transmembrane transporter activity	48/2323	134/12127	3.9683e-06	3.66784e-05	2.47049e-05	CG8860/Tom7/ATPsynbeta/nrv3/blw/sun/Tom20/Vha26/SPoCk/ATPsynB/VhaAC45/nrv2/Atpalpha/PMCA/Vha16-1/Vha68-1/VhaPPA1-1/SERCA/Sec61beta/CG31030/w/CG3164/ATPsynG/ATPsynC/ATPsyndelta/ATPsyngamma/ATPsynD/ATPsynO/ATPsynE/Tim8/Atet/rdgB/Tom40/Vha13/Vha36-1/VhaM9.7-b/Vha14-1/mge/Vha44/CG31229/Vha55/CG32091/VhaSFD/VhaAC39-1/Sec61gamma/CG17646/Tom70/MRP	48		Male.marker.genes	GO:0010647	positive regulation of cell communication	158/2449	400/12275	4.69552e-20	1.90863e-18	9.43977e-19	DENR/Cbp53E/Imp/14-3-3zeta/Mp/sun/14-3-3epsilon/hbs/CG43658/put/pyd/Akap200/TyrR/CkIIalpha/Snoo/Efa6/Cals/Actbeta/wls/fra/Cow/Socs16D/tok/Lis-1/Glut1/Tsp86D/ed/DopEcR/Ubr3/cmpy/Oct-TyrR/smt3/Diap1/Pp1-87B/Alg-2/Snx3/Smn/dlp/Rheb/CG14184/asrij/msn/Pka-C1/Prosap/S/crb/Src64B/AdipoR/Fife/tld/Exn/flw/Syt12/bib/rho/erm/mbc/spen/dally/Alk/siz/Gprk1/ttv/jeb/Dyrk2/Gprk2/Pdk1/vn/Nplp1/Pde8/VGlut/Rac1/poly…	158		Male.marker.genes	GO:0016469	proton-transporting two-sector ATPase complex	30/2364	60/11938	1.50818e-07	1.0902e-06	5.66985e-07	ATPsynF/ATPsynbeta/blw/ATPsynCF6/sun/Neb-cGP/Vha26/ATPsynB/VhaAC45/Vha16-1/Vha68-1/VhaPPA1-1/CG31030/ATPsynG/ATPsynC/ATPsyndelta/ATPsyngamma/ATPsynD/ATPsynO/ATPsynE/VhaM9.7-a/Vha13/Vha36-1/VhaM9.7-b/Vha14-1/Vha44/Vha55/VhaSFD/VhaAC39-1/CG10731	30
Male.marker.genes	GO:0015399	primary active transmembrane transporter activity	48/2323	135/12127	5.02836e-06	4.58218e-05	3.08635e-05	CG8860/Tom7/ATPsynbeta/nrv3/blw/sun/Tom20/Vha26/SPoCk/ATPsynB/VhaAC45/nrv2/Atpalpha/PMCA/Vha16-1/Vha68-1/VhaPPA1-1/SERCA/Sec61beta/CG31030/w/CG3164/ATPsynG/ATPsynC/ATPsyndelta/ATPsyngamma/ATPsynD/ATPsynO/ATPsynE/Tim8/Atet/rdgB/Tom40/Vha13/Vha36-1/VhaM9.7-b/Vha14-1/mge/Vha44/CG31229/Vha55/CG32091/VhaSFD/VhaAC39-1/Sec61gamma/CG17646/Tom70/MRP	48		Male.marker.genes	GO:0023056	positive regulation of signaling	158/2449	400/12275	4.69552e-20	1.90863e-18	9.43977e-19	DENR/Cbp53E/Imp/14-3-3zeta/Mp/sun/14-3-3epsilon/hbs/CG43658/put/pyd/Akap200/TyrR/CkIIalpha/Snoo/Efa6/Cals/Actbeta/wls/fra/Cow/Socs16D/tok/Lis-1/Glut1/Tsp86D/ed/DopEcR/Ubr3/cmpy/Oct-TyrR/smt3/Diap1/Pp1-87B/Alg-2/Snx3/Smn/dlp/Rheb/CG14184/asrij/msn/Pka-C1/Prosap/S/crb/Src64B/AdipoR/Fife/tld/Exn/flw/Syt12/bib/rho/erm/mbc/spen/dally/Alk/siz/Gprk1/ttv/jeb/Dyrk2/Gprk2/Pdk1/vn/Nplp1/Pde8/VGlut/Rac1/poly…	158		Male.marker.genes	GO:0030427	site of polarized growth	18/2364	27/11938	1.53007e-07	1.09044e-06	5.67113e-07	Trim9/Rtnl1/Con/fra/shot/Lis-1/robo1/erm/gogo/DAAM/NetB/pod1/Cortactin/CLIP-190/chb/trio/kra/Cdk5alpha	18
Male.marker.genes	GO:0005249	voltage-gated potassium channel activity	12/2323	17/12127	5.61911e-06	5.04939e-05	3.40104e-05	Shawl/Ih/eag/Hk/Shaw/Shab/Shal/SLO2/Sh/slo/KCNQ/Elk	12		Male.marker.genes	GO:0051049	regulation of transport	117/2449	262/12275	4.77889e-20	1.91554e-18	9.47393e-19	cpx/nemy/Rab3/tsr/CG9650/sky/Teh1/pyd/Frq2/RabX4/Rab11/PIP4K/CaMKII/Cam/Nrx-1/wls/Teh2/CG6329/IA-2/drpr/Chc/Mtor/rho-5/Glut1/Tomosyn/GABA-B-R2/Sar1/Sec61alpha/mgl/SERCA/cmpy/Pde6/sdt/CaBP1/Snx3/Ih/Syx1A/klar/qvr/Pka-C1/Dys/Prosap/norpA/cac/S/crb/numb/lilli/AdipoR/Fife/cindr/Rgk3/Exn/tipE/Syt12/rho/Sik3/dysc/Gprk2/brat/Tnpo/Sytbeta/NFAT/Pkc53E/CG8726/Syt4/mnb/Apc/Apoltp/Flo2/Abl/rdx/spri/Cortactin…	117		Male.marker.genes	GO:0099501	exocytic vesicle membrane	13/2364	16/11938	2.14217e-07	1.50547e-06	7.82957e-07	VGAT/fwe/wls/Syx6/VGlut/Syn/unc-13/Atet/Syt1/prt/Dop1R2/Syngr/Rph	13
Male.marker.genes	GO:0005516	calmodulin binding	19/2323	36/12127	6.41043e-06	5.68157e-05	3.82685e-05	igl/CaMKI/CaMKII/poe/Nos/CanB2/Lk6/SK/Pde1c/CanB/Ric/unc-13/PhKgamma/KCNQ/CanA-14F/rdgC/ninaC/Pp2B-14D/IP3K2	19		Male.marker.genes	GO:0051240	positive regulation of multicellular organismal process	119/2449	270/12275	8.42161e-20	3.32942e-18	1.64668e-18	hth/abd-A/Imp/Ubx/tsh/CG10257/Hr4/PIP4K/Cals/Sdc/ctp/PlexA/Actbeta/pros/zip/aPKC/shot/Dap160/rho-5/Lis-1/Sar1/Dhc64C/Sox102F/Nca/Diap1/stan/wit/Rheb/nudC/Ih/qvr/Octbeta2R/Prosap/cac/eIF4EHP/kuz/puc/tai/Src64B/Tk/Hk/mbc/nmo/Mad/Smox/EcR/kay/Hrb27C/Pdk1/wake/vn/Rac1/Ank2/sNPF/Dh31/mnb/spg/spri/Hipk/Oamb/G9a/Src42A/yki/simj/Shab/Rop/Atg1/kis/trio/bun/Akt1/Dab/sNPF-R/chic/Acer/fz/Sh/hep/PlexB/Roc1a/d…	119		Male.marker.genes	GO:0070069	cytochrome complex	19/2364	30/11938	2.31317e-07	1.60338e-06	8.33876e-07	Cyt-c1/UQCR-C2/UQCR-C1/COX5A/COX4/UQCR-14/UQCR-Q/cype/COX5B/UQCR-6.4/COX8/COX7C/COX7A/levy/RFeSP/ND-MLRQ/COX6B/ox/UQCR-11	19
Male.marker.genes	GO:0019901	protein kinase binding	33/2323	82/12127	7.70862e-06	6.72979e-05	4.53288e-05	Msp300/Nrx-1/mask/drl/Mob3/mats/Mbs/alc/crb/Lk6/Cks85A/Rac1/Atg8a/CycG/spri/Tm1/Atg17/RhoBTB/hep/Mob2/csw/CG17514/Aplip1/syd/Mob4/CycJ/Rho1/ref(2)P/Axn/Rack1/Mitofilin/dome/dock	33		Male.marker.genes	GO:0051241	negative regulation of multicellular organismal process	100/2449	210/12275	9.46445e-20	3.66359e-18	1.81195e-18	Rtca/COX5A/COX4/UQCR-14/Abd-B/tsh/nwk/COX7C/hdc/Syp/put/emc/trsn/CSN5/CadN/CaMKII/pros/rin/Bruce/ed/Hs3st-B/Sema1a/Galphao/Tl/Fas2/Spn/lwr/cdi/Diap1/klar/qvr/norpA/crb/RASSF8/numb/Src64B/Dad/Socs36E/AstC/bab1/erm/chn/sty/Mad/EcR/plum/brat/ena/Galphaq/CG7834/Octbeta1R/sdk/Liprin-gamma/Csk/Apc/Abl/shn/Src42A/CG15537/CG5214/osa/Akt1/Fak/bif/salm/C1GalTA/Mob2/MED22/MED10/dlg1/unc-104/sd/Ptpmeg/stj/Ra…	100		Male.marker.genes	GO:0043296	apical junction complex	29/2364	58/11938	2.42688e-07	1.65946e-06	8.63045e-07	kune/Fas3/crim/Lac/nrv2/pck/Cont/Atpalpha/Nrg/aPKC/ed/Nrx-IV/sdt/veli/Mbs/crb/yrt/Moe/dlg1/arm/cora/Dl/scrib/CG45049/cno/shg/wun/baz/vari	29
Male.marker.genes	GO:0003690	double-stranded DNA binding	110/2323	391/12127	7.80114e-06	6.72979e-05	4.53288e-05	hth/abd-A/Ubx/Abd-B/Antp/dsx/Blimp-1/zfh2/salr/Lim1/bi/ct/toy/ap/HmgD/Hr4/Eip75B/Su(var)205/nonA/scro/CG43689/disco/dmrt99B/br/pan/lilli/ftz-f1/bab1/bab2/CG9932/CG12605/Hr3/cic/Mad/EcR/Hr38/kay/NK7.1/Atf3/Trf2/NFAT/sqd/Thd1/Xbp1/TfAP-2/tup/Mef2/vvl/CG10543/drm/odd/CG32532/Rx/grn/mid/Pdp1/Drgx/hb/Optix/D1/Mnn1/Xrp1/sd/Stat92E/CG32767/CHES-1-like/da/Utx/foxo/B-H1/B-H2/sim/ey/Hr51/Dif/CG12769/Lim3/P…	110		Male.marker.genes	GO:0034220	ion transmembrane transport	125/2449	290/12275	9.52077e-20	3.66359e-18	1.81195e-18	path/Cyt-c1/Dic1/ATPsynF/ATPsynbeta/porin/VGAT/fwe/nrv3/blw/ATPsynCF6/sun/kcc/COX5B/Vha26/SPoCk/ATPsynB/Nckx30C/Ca-alpha1T/CG42594/nAChRbeta2/nAChRalpha2/VhaAC45/nrv2/Atpalpha/PMCA/Cam/Vha16-1/Rdl/Nhe3/Vha68-1/CG6329/Fer2LCH/CD98hc/VhaPPA1-1/Ca-alpha1D/para/CG1090/Ndae1/Sec61alpha/nAChRalpha3/CG1688/SERCA/Shawl/Fer1HCH/CG42340/pHCl-1/Ostgamma/CG31030/Task7/mnd/GluClalpha/nAChRalpha6/qvr/nAChRalph…	125		Male.marker.genes	GO:1905368	peptidase complex	39/2364	90/11938	2.92044e-07	1.97033e-06	1.02472e-06	Prosalpha6/Rpn8/Rpn11/Rpn7/Rpt3/Prosbeta1/Rpn10/Prosbeta3/Prosbeta2/Prosalpha7/Sem1/Rpn6/Nipped-A/twr/Spase22-23/Prosbeta4/Spase25/Prosbeta5/Prosbeta6/Prosalpha2/Prosalpha5/Prosalpha3/Prosalpha4/Rpn9/Rpn12/Spase12/Taf12/Sf3b5/Rpt6/Rad23/e(y)2/not/Taf10b/Uch-L5/Rpn5/Pomp/Rpt4/REG/TER94	39
Male.marker.genes	GO:0004672	protein kinase activity	77/2323	256/12127	1.46991e-05	0.000125136	8.42859e-05	Btk29A/put/bma/CkIIalpha/Tlk/CaMKI/CaMKII/aPKC/Nrk/cdi/PKD/wit/msn/Pka-C1/alc/Eip63E/Src64B/Lk6/Drak/nmo/Alk/Gprk1/JIL-1/otk/Sik3/Dyrk2/Gprk2/Pdk1/Pkc53E/Ret/mnb/CycG/Csk/sff/Abl/Ddr/Hipk/gish/Src42A/grp/Atg1/Strn-Mlck/trio/Akt1/Fak/CG4629/PhKgamma/hep/CkIIbeta/CASK/Slob/Pak3/hppy/Pka-C3/Pkc98E/SRPK/Pitslre/wts/Asator/dco/InR/CG31145/CycJ/CG3277/Pvr/Srpk79D/ninaC/Sik2/bsk/Nak/Cdk12/tkv/CkIalpha/s…	77		Male.marker.genes	GO:0016358	dendrite development	89/2449	177/12275	1.11783e-19	4.24483e-18	2.09942e-18	prel/path/ct/ham/p120ctn/put/Snoo/BuGZ/CadN/futsch/tutl/pros/Nrg/fra/shot/sli/Lis-1/Sema1a/Sar1/robo1/drl/Dhc64C/scro/smt3/stan/wit/Adf1/nudC/Toll-6/br/Prosap/lola/Dlic/ftz-f1/D/hid/jim/fs(1)h/dally/Dscam1/chn/Smox/shrb/EcR/kay/ena/Rac1/Sema2b/Ret/NetB/pum/Abl/shn/CG9705/fru/E(Pc)/G9a/ara/tup/Tm1/vvl/Rop/Akt1/RunxA/acj6/ab/Optix/mav/unc-104/Mical/sn/Nedd4/foxo/cnc/cv-c/comm/wts/robl/Rfx/pho/Ptp69…	89		Male.marker.genes	GO:0045169	fusome	20/2364	33/11938	3.1427e-07	2.09238e-06	1.08819e-06	Rab11/Calr/Rtnl1/Vha16-1/Tsp42Ee/l(1)G0320/shot/Sec61alpha/Dhc64C/CG12163/Fer1HCH/shrb/Cp1/CLIP-190/chb/scrib/tmod/hts/TER94/alpha-Spec	20
Male.marker.genes	GO:0001228	DNA-binding transcription activator activity, RNA polymerase II-specific	34/2323	88/12127	1.59942e-05	0.000134393	9.05206e-05	dsx/bi/Adf1/CG43689/dmrt99B/pan/ftz-f1/Eip74EF/Mad/EcR/kay/Mef2/vvl/sima/onecut/mid/Pdp1/Stat92E/da/foxo/B-H1/B-H2/sim/Dif/CG12769/oc/Myc/Mrtf/apt/pnt/akirin/kn/trh/E2f1	34		Male.marker.genes	GO:0051130	positive regulation of cellular component organization	131/2449	311/12275	1.36254e-19	5.10688e-18	2.52578e-18	Imp/nwk/Ssb-c31a/chinmo/bru1/CG43658/put/Lar/Su(var)205/Rpt3/Arpc5/Cals/Nrx-1/Sdc/PlexA/aPKC/shot/drpr/svr/Chc/Mtor/Invadolysin/Lis-1/Sar1/Dhc64C/Jupiter/ringer/sdt/CaBP1/Arpc4/Arpc3A/stan/wit/Arpc1/Rheb/HP1c/Taf11/nudC/IRSp53/Octbeta2R/Prosap/norpA/cac/numb/kug/CG11486/cindr/eEF5/nmo/Mad/Gprk2/Su(z)2/ena/spir/Mitf/DAAM/Pkc53E/Syt4/Rac1/Ank2/mnb/Ncoa6/Abl/spri/Cortactin/gish/G9a/Moe/Vrp1/chb/yki/…	131		Male.marker.genes	GO:0030426	growth cone	17/2364	26/11938	5.21365e-07	3.42098e-06	1.77917e-06	Trim9/Rtnl1/Con/fra/shot/Lis-1/robo1/erm/gogo/DAAM/NetB/pod1/CLIP-190/chb/trio/kra/Cdk5alpha	17
Male.marker.genes	GO:0005543	phospholipid binding	39/2323	107/12127	1.95813e-05	0.000162424	0.000109401	nwk/Efa6/CG6329/drpr/Snx3/IRSp53/qvr/Syt12/Gprk1/Klp98A/Gprk2/AnxB11/Sytbeta/CG8726/Syt4/Moe/Akt1/rpr/EndoB/unc-13/PsGEF/mim/rdgB/Syt1/Syt7/Cip4/neur/rdgBbeta/EndoA/Myo31DF/Rph/baz/Graf/ninaC/Nup62/Amph/CG15602/cert/Synd	39		Male.marker.genes	GO:0007626	locomotory behavior	95/2449	196/12275	1.71167e-19	6.33317e-18	3.13228e-18	unc79/Gad1/slgA/nemy/Bx/Trim9/CkIIalpha/Atpalpha/shakB/tutl/shep/Fer2LCH/FMRFaR/drpr/twz/amon/Ktl/SERCA/sbb/Tbh/Pp1-87B/Smn/Adf1/disco/lov/Ih/dnc/nAChRalpha7/Nlg2/Mbs/norpA/cac/Tk/EcR/kay/dysc/CCKLR-17D3/Mid1/tara/Galphaq/Fer2/Rac1/Plc21C/brp/Trpgamma/G9a/TfAP-2/Mef2/dati/Shab/nej/Ac3/acj6/Sh/Cirl/sxc/tay/CkIIbeta/unc80/CASK/dlg1/unc-104/Syt1/Adar/foxo/sim/ey/Hr51/Pka-R2/dco/InR/dod/dj-1beta/Cdk5…	95		Male.marker.genes	GO:0031674	I band	23/2364	42/11938	5.27345e-07	3.42098e-06	1.77917e-06	Tpi/Pgk/mbl/Pglym78/Gapdh1/Msp300/Hsp67Bc/Hsc70-4/zip/mask/Dg/Smn/CG14207/Lmpt/DAAM/rhea/CG43707/stv/CG1674/STUB1/kon/tn/RyR	23
Male.marker.genes	GO:0005085	guanyl-nucleotide exchange factor activity	32/2323	82/12127	2.22109e-05	0.000181904	0.000122522	CG43658/Efa6/Cdep/GEFmeso/Sec61beta/CG14184/eEF1delta/Exn/mbc/siz/Ziz/Epac/C3G/spg/CG42674/spri/PDZ-GEF/trio/sif/RhoGEF3/PsGEF/Zir/Trs31/Rgl/strat/Tctp/pns/CG34393/ric8a/CG9098/Bet5/CG14812	32		Male.marker.genes	GO:0032940	secretion by cell	103/2449	221/12275	1.91153e-19	6.98314e-18	3.45374e-18	gammaSnap1/Scp2/cpx/Gdi/nemy/Rab3/tsr/CG9650/sky/Hsc70-4/Frq2/RabX4/Rab11/CaMKII/wls/CG5021/nSyb/bai/eca/Chc/p24-1/CHOp24/rho-5/Glut1/Tomosyn/GABA-B-R2/Sar1/unc-13-4A/Nrx-IV/cmpy/CG10098/veli/Snx3/ksh/Ih/Syx1A/Dys/cac/S/puc/AdipoR/Syx6/Fife/Exn/Syt12/Rim/CG31475/CanB2/Sytbeta/NFAT/Syt4/CanB/brp/eIF3m/Flo2/Cadps/Snap25/CG15537/jagn/Rop/nej/Akt1/Syn/Cirl/Rab6/unc-13/corn/Rab26/Ehbp1/Syx13/Tango5/CA…	103		Male.marker.genes	GO:0030658	transport vesicle membrane	20/2364	34/11938	6.21217e-07	3.97894e-06	2.06934e-06	VGAT/fwe/wls/Chc/Sar1/Syx6/VGlut/Syn/VAChT/unc-13/Atet/Syt1/prt/Dop1R2/AP-1sigma/Syngr/Rph/Afti/Sec22/Sec16	20
Male.marker.genes	GO:0033218	amide binding	34/2323	90/12127	2.78331e-05	0.0002251	0.000151617	Tom20/AstC-R1/AstC-R2/Fs(2)Ket/SsRbeta/CG4467/KdelR/Sec61alpha/Cyp1/CG2852/Srp14/SP1029/AstA-R1/Tnpo/CG15537/Dh44-R2/CG3662/ND-ACP/Nup153/GstO2/Dh44-R1/InR/Rh7/CG31229/cyp33/CG17896/FASN1/ImpL2/Psa/cert/CG5071/CG8814/Karybeta3/PCB	34		Male.marker.genes	GO:0051094	positive regulation of developmental process	116/2449	263/12275	2.31308e-19	8.34444e-18	4.12702e-18	hth/abd-A/Imp/Ubx/Abd-B/tsh/bru1/CG10257/Hr4/PIP4K/Cals/Sdc/ctp/PlexA/Actbeta/pros/zip/aPKC/shot/Dap160/Pdcd4/Lis-1/Sar1/Dhc64C/Diap1/stan/wit/Rheb/nudC/Octbeta2R/Prosap/cac/eIF4EHP/kuz/puc/tai/Src64B/hid/mbc/nmo/Mad/Smox/EcR/kay/Hrb27C/Pdk1/DAAM/vn/Rac1/Ank2/sNPF/mnb/spg/spri/Hipk/G9a/Src42A/yki/simj/Rop/Atg1/kis/trio/bun/pico/Akt1/Dab/sNPF-R/chic/fz/Fis1/hep/PlexB/Roc1a/dlg1/Pak3/da/Nedd4/RasGA…	116		Male.marker.genes	GO:0044463	cell projection part	130/2364	444/11938	7.15188e-07	4.46772e-06	2.32355e-06	Rpn8/path/Cbp53E/VGAT/cpx/hdc/Trim9/sky/dpr10/dpr3/Mmp2/Rab11/dpr15/CadN/CaMKII/Rtnl1/Nrx-1/futsch/nSyb/Con/Rdl/fra/dpr14/shot/Lis-1/dpr19/dpr13/DIP-gamma/dpr20/mAChR-A/robo1/drl/Dhc64C/dpr11/dpr9/Fas2/5-HT1A/Spn/dpr8/Shawl/eIF4E1/dpr5/X11Lbeta/dpr18/dpr17/Syx1A/nAChRalpha7/Pka-C1/Prosap/norpA/dpr6/dpr2/kek6/erm/Dscam1/cdc14/Alk/gogo/shrb/EcR/jeb/dysc/dpr12/plum/orb2/ena/Galphaq/DAAM/Magi/Lrp4/An…	130
Male.marker.genes	GO:0003743	translation initiation factor activity	23/2323	52/12127	3.05543e-05	0.000243493	0.000164005	DENR/eIF4G1/eIF4H1/eIF4G2/eIF4E1/eIF4A/eIF4EHP/eIF3m/eIF3g1/eIF1A/eIF1/eIF5B/eIF3e/eIF2gamma/eIF3l/eIF3h/eIF3f1/eIF3d1/eIF3b/NAT1/eIF3i/eIF3a/mxt	23		Male.marker.genes	GO:0023061	signal release	75/2449	139/12275	4.46764e-19	1.5918e-17	7.8728e-18	gammaSnap1/cpx/Gdi/nemy/Rab3/CG9650/sky/Hsc70-4/Frq2/wls/nSyb/bai/eca/Chc/p24-1/CHOp24/Glut1/Tomosyn/GABA-B-R2/unc-13-4A/Nrx-IV/cmpy/veli/Snx3/Ih/Syx1A/Dys/cac/AdipoR/Syx6/Fife/Exn/Syt12/Rim/CanB2/Sytbeta/NFAT/Syt4/CanB/brp/Flo2/Cadps/Snap25/CG15537/Rop/nej/Akt1/Syn/Cirl/unc-13/Syx13/CASK/unc-104/BicD/Syt1/lqf/Syt7/Snap24/Arf102F/dco/InR/Frq1/Syngr/Rph/alphaSnap/twit/X11L/Obp56h/Sec22/Rab1/gammaS…	75		Male.marker.genes	GO:0120038	plasma membrane bounded cell projection part	130/2364	444/11938	7.15188e-07	4.46772e-06	2.32355e-06	Rpn8/path/Cbp53E/VGAT/cpx/hdc/Trim9/sky/dpr10/dpr3/Mmp2/Rab11/dpr15/CadN/CaMKII/Rtnl1/Nrx-1/futsch/nSyb/Con/Rdl/fra/dpr14/shot/Lis-1/dpr19/dpr13/DIP-gamma/dpr20/mAChR-A/robo1/drl/Dhc64C/dpr11/dpr9/Fas2/5-HT1A/Spn/dpr8/Shawl/eIF4E1/dpr5/X11Lbeta/dpr18/dpr17/Syx1A/nAChRalpha7/Pka-C1/Prosap/norpA/dpr6/dpr2/kek6/erm/Dscam1/cdc14/Alk/gogo/shrb/EcR/jeb/dysc/dpr12/plum/orb2/ena/Galphaq/DAAM/Magi/Lrp4/An…	130
Male.marker.genes	GO:0042277	peptide binding	28/2323	69/12127	3.086e-05	0.000243493	0.000164005	Tom20/AstC-R1/AstC-R2/Fs(2)Ket/SsRbeta/CG4467/KdelR/Sec61alpha/Cyp1/CG2852/Srp14/SP1029/AstA-R1/Tnpo/CG15537/Dh44-R2/CG3662/Nup153/GstO2/Dh44-R1/InR/Rh7/CG31229/cyp33/ImpL2/Psa/CG5071/Karybeta3	28		Male.marker.genes	GO:0045664	regulation of neuron differentiation	89/2449	180/12275	4.63541e-19	1.63144e-17	8.06882e-18	Rtca/hth/Imp/hdc/Trim9/ham/Lar/emc/CadN/ctp/PlexA/tutl/pros/fra/shot/Lis-1/ed/Sema1a/Sar1/robo1/Dhc64C/Fas2/cdi/stan/Rheb/Adf1/nudC/Prosap/Mbs/kuz/Src64B/tinc/Dlic/Socs36E/Dscam1/Alk/sty/CG34401/EcR/DAAM/Rac1/sdk/Ret/NetB/mnb/spg/Abl/PDZ-GEF/G9a/Src42A/vvl/Rop/trio/Akt1/Dab/bif/chic/mav/sif/fz/PlexB/Roc1a/RhoGAPp190/unc-104/Mical/csw/da/Nedd4/RasGAP1/cv-c/Hr51/comm/pAbp/wts/InR/neur/oc/aop/sv/Rho…	89		Male.marker.genes	GO:0033181	plasma membrane proton-transporting V-type ATPase complex	13/2364	17/11938	7.44305e-07	4.59291e-06	2.38866e-06	Vha26/VhaAC45/Vha16-1/VhaPPA1-1/CG31030/Vha13/Vha36-1/VhaM9.7-b/Vha14-1/Vha44/Vha55/VhaSFD/VhaAC39-1	13
Male.marker.genes	GO:0022836	gated channel activity	53/2323	163/12127	3.12415e-05	0.000243533	0.000164033	porin/Ca-alpha1T/nAChRbeta2/nAChRalpha2/CG4587/Rdl/Ca-alpha1D/CG15270/tty/Nmdar2/nAChRalpha3/GluRIB/GluRIA/Shawl/pHCl-1/GluClalpha/Ih/nAChRalpha6/nAChRalpha7/cac/eag/NaCP60E/CG42260/jp/Hk/SK/Cngl/CG3638/nAChRalpha1/Mid1/nAChRalpha5/Shaw/Trpgamma/Trpm/Shab/Shal/Best1/SLO2/Sh/nAChRbeta1/slo/Lcch3/CG11155/KCNQ/stj/Ca-beta/GPHR/Elk/Piezo/nAChRalpha4/Nmdar1/Grd/RyR	53		Male.marker.genes	GO:0009968	negative regulation of signal transduction	131/2449	315/12275	5.06806e-19	1.76222e-17	8.71564e-18	chrb/wry/CG10257/Hr4/pyd/RapGAP1/BI-1/Mmp2/Snoo/Cam/Cow/Bili/nkd/Dap160/rho-5/Gbeta13F/ed/Tl/Fas2/cmpy/Nca/lwr/cdi/Rheb/SoxN/eIF4A/qvr/dnc/CG32683/Pka-C1/crb/Gug/puc/numb/LRR/Dad/Socs36E/Mkp3/flw/kek5/Rala/nmo/Ptp10D/dally/Smr/kek1/crol/CG42684/Gprk1/otk/phyl/sty/Sik3/Gprk2/Galphaq/pum/mnb/CycG/Apc/Sesn/rdx/Pli/Hipk/Src42A/CG15537/ATPsynD/Atg1/nej/Akt1/gro/Smurf/CG4629/scyl/E(bx)/PlexB/Roc1a/tay/…	131		Male.marker.genes	GO:0030672	synaptic vesicle membrane	12/2364	15/11938	8.85955e-07	5.40112e-06	2.80899e-06	VGAT/fwe/wls/Syx6/VGlut/Syn/unc-13/Syt1/prt/Dop1R2/Syngr/Rph	12
Male.marker.genes	GO:0046873	metal ion transmembrane transporter activity	62/2323	200/12127	3.61625e-05	0.000278537	0.00018761	fwe/nrv3/CG10804/Calx/kcc/SPoCk/Nckx30C/Ca-alpha1T/CG42594/nrv2/Atpalpha/PMCA/CG4587/Nhe3/Ca-alpha1D/para/CG43066/CG1090/Ndae1/CG1688/SERCA/GluRIA/Shawl/CG42340/CG10470/Task7/Ih/cac/eag/NaCP60E/jp/tipE/Hk/SK/Mid1/Shaw/Trpgamma/Trpm/GC1/Shab/Shal/SLO2/Sh/slo/MCU/rdgB/CG11155/KCNQ/stj/CG7708/prt/Ca-beta/CG43155/Task6/Elk/ZnT63C/Eaat2/olf186-F/Nhe2/Zip102B/CG10413/RyR	62		Male.marker.genes	GO:0098655	cation transmembrane transport	96/2449	203/12275	9.46349e-19	3.25138e-17	1.60808e-17	Cyt-c1/ATPsynF/ATPsynbeta/fwe/nrv3/blw/ATPsynCF6/sun/COX5B/Vha26/SPoCk/ATPsynB/Nckx30C/Ca-alpha1T/CG42594/nAChRalpha2/VhaAC45/nrv2/Atpalpha/PMCA/Cam/Vha16-1/Nhe3/Vha68-1/CG6329/Fer2LCH/CD98hc/VhaPPA1-1/Ca-alpha1D/para/CG1090/Ndae1/Sec61alpha/CG1688/SERCA/Shawl/Fer1HCH/CG42340/Ostgamma/CG31030/Task7/mnd/qvr/Prosap/cac/eag/NaCP60E/Rgk3/SK/nAChRalpha1/Mid1/JhI-21/Plc21C/Shaw/Trpgamma/Trpm/ATPsynG/AT…	96		Male.marker.genes	GO:0099738	cell cortex region	33/2364	74/11938	1.07269e-06	6.46166e-06	3.36055e-06	app/Syp/sqh/Bsg/Ten-a/pros/zip/aPKC/Dap160/Rbp/Spn/sdt/Mbs/Fife/cindr/Rim/nuf/CG42684/brat/brp/Abl/yki/sano/unc-13/dlg1/Dl/wts/Rab35/strat/Arpc2/Rho1/baz/kibra	33
Male.marker.genes	GO:0016655	oxidoreductase activity, acting on NAD(P)H, quinone or similar compound as acceptor	14/2323	25/12127	4.53423e-05	0.000345135	0.000232467	ND-42/ND-ASHI/ND-B14.5B/ND-30/ND-B15/ND-B17.2/ND-18/ND-75/ND-B18/ND-51/ND-20/ND-B16.6/ND-B14.5A/CG10672	14		Male.marker.genes	GO:0048813	dendrite morphogenesis	83/2449	164/12275	1.15472e-18	3.92062e-17	1.93908e-17	prel/path/ct/ham/p120ctn/put/Snoo/BuGZ/CadN/futsch/tutl/pros/Nrg/fra/shot/sli/Lis-1/Sema1a/Sar1/robo1/drl/Dhc64C/scro/smt3/stan/wit/nudC/Toll-6/br/Prosap/lola/Dlic/ftz-f1/D/hid/jim/fs(1)h/dally/Dscam1/chn/Smox/shrb/EcR/kay/ena/Rac1/Sema2b/NetB/pum/Abl/shn/CG9705/fru/E(Pc)/G9a/ara/tup/Tm1/vvl/RunxA/acj6/ab/Optix/unc-104/Mical/Nedd4/foxo/cnc/cv-c/comm/wts/robl/Rfx/pho/Ptp69D/Rho1/Bap55/Nak/kn/Sema2…	83		Male.marker.genes	GO:0099512	supramolecular fiber	67/2364	196/11938	1.37686e-06	8.19639e-06	4.26274e-06	Tpi/Pgk/betaTub56D/mbl/Pglym78/Gapdh1/Msp300/Hsp67Bc/alphaTub84B/Hsc70-4/sqh/futsch/zip/shot/mask/Lis-1/Dg/Dhc64C/awd/Jupiter/ringer/pigs/CG14535/robo3/Smn/klar/CG14207/Lmpt/CG17839/Lk6/Klp98A/DAAM/tau/rhea/Apc/pod1/Cortactin/CLIP-190/Moe/Vrp1/chb/Tm1/alphaTub84D/tacc/Kif3C/Kank/Ran/CG43707/unc-104/Khc-73/stv/sals/gammaTub23C/Tctp/Arp3/capu/Scgdelta/hts/up/CG1674/STUB1/twf/Lam/CG6891/kon/tn/RyR	67
Male.marker.genes	GO:0005216	ion channel activity	70/2323	235/12127	4.99154e-05	0.000375527	0.000252937	porin/fwe/Nckx30C/Ca-alpha1T/CG42594/nAChRbeta2/nAChRalpha2/CG4587/Rdl/Ca-alpha1D/CG15270/para/tty/Nmdar2/CG1090/nAChRalpha3/CG1688/GluRIB/GluRIA/Shawl/CG42340/pHCl-1/CG10470/Task7/GluClalpha/Ih/nAChRalpha6/nAChRalpha7/cac/eag/NaCP60E/CG42260/jp/tipE/Hk/bib/SK/Cngl/CG3638/nAChRalpha1/Mid1/nAChRalpha5/Shaw/Trpgamma/Trpm/Shab/Shal/Best1/SLO2/Sh/nAChRbeta1/slo/Lcch3/MCU/unc80/CG11155/KCNQ/stj/Ca-bet…	70		Male.marker.genes	GO:0007622	rhythmic behavior	65/2449	113/12275	1.21276e-18	4.06979e-17	2.01285e-17	unc79/Gabat/Bx/CkIIalpha/trsn/Hsp83/Rdl/Fer2LCH/rho-5/5-HT1A/Nca/disco/Ih/qvr/dnc/Pka-C1/Mbs/numb/Hk/EcR/Sik3/kay/dysc/Mid1/tara/wake/Fer2/Rac1/Dh31/Oamb/TfAP-2/Mef2/Shab/nej/Ac3/Acer/Sh/slo/sxc/CkIIbeta/unc80/dlg1/Adar/foxo/Nipped-B/Hr51/Pka-R2/Dop1R2/dco/InR/dod/mld/tim/Rh7/Rho1/lid/tyf/NPF/Ets96B/Pdfr/Dh44/Bdbt/qsm/na/dome	65		Male.marker.genes	GO:0071011	precatalytic spliceosome	53/2364	144/11938	1.3986e-06	8.22899e-06	4.27969e-06	Imp/Syp/Hsc70-4/CG17454/SF2/Pabp2/nonA/rin/B52/Rm62/SmE/mago/SmD3/x16/lost/CG2021/Sf3b6/U4-U6-60K/sqd/ytr/CG2931/Caper/Rbp1-like/CG10418/Bin1/CG1622/Sf3b5/Acn/CG42724/Pep/Dim1/hfp/pAbp/Ref1/SmB/SmD1/Prp31/Prp3/cyp33/Sf3b2/CG7971/Neos/SNRPG/SmF/Bx42/SmD2/REG/Rack1/LSm3/hoip/c12.1/Phf5a/U2A	53
Male.marker.genes	GO:0022839	ion gated channel activity	51/2323	158/12127	5.42476e-05	0.000403428	0.00027173	porin/Ca-alpha1T/nAChRbeta2/nAChRalpha2/CG4587/Rdl/Ca-alpha1D/CG15270/tty/Nmdar2/nAChRalpha3/GluRIB/GluRIA/Shawl/pHCl-1/GluClalpha/Ih/nAChRalpha6/nAChRalpha7/cac/eag/NaCP60E/CG42260/jp/Hk/SK/Cngl/CG3638/nAChRalpha1/Mid1/nAChRalpha5/Shaw/Trpm/Shab/Shal/Best1/SLO2/Sh/nAChRbeta1/slo/Lcch3/CG11155/KCNQ/stj/Ca-beta/GPHR/Elk/nAChRalpha4/Nmdar1/Grd/RyR	51		Male.marker.genes	GO:0048638	regulation of developmental growth	104/2449	229/12275	1.33221e-18	4.41925e-17	2.18569e-17	Ubx/nwk/Syp/Lar/Hr4/PIP4K/CadN/CaMKII/Sdc/futsch/Actbeta/shot/rin/Sema1a/Galphao/Tl/Fas2/Nos/sbb/Syn1/veli/dlp/stan/wit/Rheb/Octbeta2R/cac/crb/kuz/RASSF8/Src64B/Dad/hid/nmo/dally/Mad/Smox/dysc/plum/brat/ena/Pdk1/Octbeta1R/Rac1/Ank2/sNPF/pum/Liprin-gamma/mnb/sfl/Csk/Abl/Hipk/Hs6st/Src42A/yki/simj/kis/trio/pico/Akt1/Fak/bif/sNPF-R/chic/fz/slo/Mob2/CASK/dlg1/unc-104/stj/foxo/ey/Hr51/metro/btsz/scrib…	104		Male.marker.genes	GO:0000502	proteasome complex	29/2364	62/11938	1.43758e-06	8.26606e-06	4.29897e-06	Prosalpha6/Rpn8/Rpn11/Rpn7/Rpt3/Prosbeta1/Rpn10/Prosbeta3/Prosbeta2/Prosalpha7/Sem1/Rpn6/Prosbeta4/Prosbeta5/Prosbeta6/Prosalpha2/Prosalpha5/Prosalpha3/Prosalpha4/Rpn9/Rpn12/Rpt6/Rad23/Uch-L5/Rpn5/Pomp/Rpt4/REG/TER94	29
Male.marker.genes	GO:0051427	hormone receptor binding	8/2323	10/12127	5.57096e-05	0.000409592	0.000275883	tai/DOR/Hr38/E(bx)/Utx/arm/Pa1/Bap111	8		Male.marker.genes	GO:0042592	homeostatic process	176/2449	478/12275	1.83222e-18	6.00884e-17	2.97188e-17	Nap1/IscU/Men-b/Tpi/Pgk/Su(P)/Torsin/Cbp53E/mbl/CG14757/PyK/sesB/fwe/nrv3/Eno/Gapdh2/tsr/SPoCk/Nckx30C/rdgA/Atox1/VhaAC45/Su(var)205/Lac/nrv2/endos/sqh/Txl/Atpalpha/PMCA/Cam/shakB/CG5554/zip/Hsc70-3/Nhe3/Vha68-1/fra/Fer2LCH/FMRFaR/Mtor/CG40178/ZAP3/amon/SP2353/Lis-1/Glut1/Dg/CG5027/CG1090/Ndae1/robo1/Nrk/uex/SERCA/smt3/Fer1HCH/CaBP1/CG31030/CG8993/CG7484/CG10470/Scox/Manf/CG1840/Rheb/CG14184/disc…	176		Male.marker.genes	GO:1905369	endopeptidase complex	29/2364	62/11938	1.43758e-06	8.26606e-06	4.29897e-06	Prosalpha6/Rpn8/Rpn11/Rpn7/Rpt3/Prosbeta1/Rpn10/Prosbeta3/Prosbeta2/Prosalpha7/Sem1/Rpn6/Prosbeta4/Prosbeta5/Prosbeta6/Prosalpha2/Prosalpha5/Prosalpha3/Prosalpha4/Rpn9/Rpn12/Rpt6/Rad23/Uch-L5/Rpn5/Pomp/Rpt4/REG/TER94	29
Male.marker.genes	GO:0016773	phosphotransferase activity, alcohol group as acceptor	91/2323	327/12127	7.21876e-05	0.00052478	0.000353467	Btk29A/PyK/rdgA/put/bma/CkIIalpha/Tlk/PIP4K/CaMKI/CaMKII/aPKC/Nrk/cdi/PKD/wit/msn/Pka-C1/alc/Eip63E/Src64B/Dgk/CG2201/Lk6/Drak/nmo/Alk/Gprk1/JIL-1/otk/Gk2/Sik3/Hex-A/Dyrk2/Gprk2/Pdk1/CG31140/Pkc53E/Ret/CG34384/mnb/CycG/Csk/sff/Abl/Ddr/Hipk/gish/Src42A/grp/Atg1/Strn-Mlck/trio/eas/Akt1/Fak/CG4629/PhKgamma/hep/CkIIbeta/CASK/Slob/fwd/Pak3/hppy/Pka-C3/Pkc98E/SRPK/Pitslre/wts/Asator/dco/InR/CG31145/Pdx…	91		Male.marker.genes	GO:0048512	circadian behavior	64/2449	111/12275	1.89432e-18	6.1427e-17	3.03808e-17	unc79/Gabat/Bx/CkIIalpha/trsn/Hsp83/Rdl/Fer2LCH/rho-5/5-HT1A/Nca/disco/Ih/qvr/dnc/Pka-C1/Mbs/Hk/EcR/Sik3/kay/dysc/Mid1/tara/wake/Fer2/Rac1/Dh31/Oamb/TfAP-2/Mef2/Shab/nej/Ac3/Acer/Sh/slo/sxc/CkIIbeta/unc80/dlg1/Adar/foxo/Nipped-B/Hr51/Pka-R2/Dop1R2/dco/InR/dod/mld/tim/Rh7/Rho1/lid/tyf/NPF/Ets96B/Pdfr/Dh44/Bdbt/qsm/na/dome	64		Male.marker.genes	GO:0030018	Z disc	22/2364	41/11938	1.48173e-06	8.4242e-06	4.38121e-06	Tpi/Pgk/mbl/Pglym78/Gapdh1/Msp300/Hsp67Bc/Hsc70-4/zip/mask/Dg/Smn/CG14207/DAAM/rhea/CG43707/stv/CG1674/STUB1/kon/tn/RyR	22
Male.marker.genes	GO:0008137	NADH dehydrogenase (ubiquinone) activity	13/2323	23/12127	7.49488e-05	0.000532878	0.000358922	ND-42/ND-ASHI/ND-B14.5B/ND-30/ND-B15/ND-B17.2/ND-18/ND-75/ND-B18/ND-51/ND-20/ND-B16.6/ND-B14.5A	13		Male.marker.genes	GO:0050804	modulation of chemical synaptic transmission	69/2449	125/12275	2.26747e-18	7.19112e-17	3.55661e-17	Cbp53E/cpx/Sap47/nemy/Rab3/Sod1/Syp/sky/mGluR/Frq2/Cals/Nrx-1/Rdl/CG6329/Nlg4/Dg/Tomosyn/GABA-B-R2/Fas2/Smn/Ih/qvr/Pka-C1/Dys/Nlg2/Prosap/cac/Src64B/kek6/Fife/Exn/Syt12/Rim/Nlg3/Alk/jeb/dysc/Galphaq/VGlut/NFAT/Syt4/Ank2/pum/Plc21C/brp/Csk/Gycbeta100B/Snap25/Src42A/Shab/Sod2/Atg1/Akt1/Sh/slo/CG11155/CASK/Slob/BicD/Syt1/Rpt6/spz5/cv-c/shi/Frq1/dj-1beta/twit/TkR99D/alpha-Spec	69		Male.marker.genes	GO:0098802	plasma membrane receptor complex	26/2364	53/11938	1.61656e-06	9.08865e-06	4.72678e-06	GABA-B-R3/nAChRbeta2/put/nAChRalpha2/mGluR/Nmdar2/GABA-B-R2/GABA-B-R1/nAChRalpha3/GluRIB/GluRIA/wit/nAChRalpha6/nAChRalpha7/Prosap/nAChRalpha1/Neto/nAChRalpha5/mew/nAChRbeta1/dlg1/scrib/InR/nAChRalpha4/Nmdar1/tkv	26
Male.marker.genes	GO:0050136	NADH dehydrogenase (quinone) activity	13/2323	23/12127	7.49488e-05	0.000532878	0.000358922	ND-42/ND-ASHI/ND-B14.5B/ND-30/ND-B15/ND-B17.2/ND-18/ND-75/ND-B18/ND-51/ND-20/ND-B16.6/ND-B14.5A	13		Male.marker.genes	GO:0099177	regulation of trans-synaptic signaling	69/2449	125/12275	2.26747e-18	7.19112e-17	3.55661e-17	Cbp53E/cpx/Sap47/nemy/Rab3/Sod1/Syp/sky/mGluR/Frq2/Cals/Nrx-1/Rdl/CG6329/Nlg4/Dg/Tomosyn/GABA-B-R2/Fas2/Smn/Ih/qvr/Pka-C1/Dys/Nlg2/Prosap/cac/Src64B/kek6/Fife/Exn/Syt12/Rim/Nlg3/Alk/jeb/dysc/Galphaq/VGlut/NFAT/Syt4/Ank2/pum/Plc21C/brp/Csk/Gycbeta100B/Snap25/Src42A/Shab/Sod2/Atg1/Akt1/Sh/slo/CG11155/CASK/Slob/BicD/Syt1/Rpt6/spz5/cv-c/shi/Frq1/dj-1beta/twit/TkR99D/alpha-Spec	69		Male.marker.genes	GO:0044445	cytosolic part	82/2364	256/11938	1.97839e-06	1.10007e-05	5.7212e-06	IscU/MCTS1/Eno/CCT4/Rpt3/Gycalpha99B/RpS3A/RpS23/RpL19/RpL26/RpL15/RpS9/RpL36/RpL23/RpL31/RpL12/RpL41/RpS6/RpS21/RpL28/RpS20/RpL39/RpL23A/RpS7/RpL32/RpL37A/RpLP0/RpL38/RpL29/RpL35/RpL5/RpLP1/RpL27/sta/RpS26/RpL8/RpS4/RpS12/RpS27/RpS29/RpS16/RpS8/RpS25/RpS15/RpL35A/RpL13/RpL7/RpL4/RpL18/RpL30/Gycbeta100B/RpL7A/RpL36A/RpL11/Snap25/RpS19a/RpL24/CCT3/Gyc89Db/CG17683/Blos1/Rpt6/RpL14/RpS30/CG14562/RpL…	82
Male.marker.genes	GO:0022838	substrate-specific channel activity	70/2323	238/12127	7.7537e-05	0.000545288	0.000367281	porin/fwe/Nckx30C/Ca-alpha1T/CG42594/nAChRbeta2/nAChRalpha2/CG4587/Rdl/Ca-alpha1D/CG15270/para/tty/Nmdar2/CG1090/nAChRalpha3/CG1688/GluRIB/GluRIA/Shawl/CG42340/pHCl-1/CG10470/Task7/GluClalpha/Ih/nAChRalpha6/nAChRalpha7/cac/eag/NaCP60E/CG42260/jp/tipE/Hk/bib/SK/Cngl/CG3638/nAChRalpha1/Mid1/nAChRalpha5/Shaw/Trpgamma/Trpm/Shab/Shal/Best1/SLO2/Sh/nAChRbeta1/slo/Lcch3/MCU/unc80/CG11155/KCNQ/stj/Ca-bet…	70		Male.marker.genes	GO:0046903	secretion	108/2449	244/12275	3.00785e-18	9.4355e-17	4.66665e-17	gammaSnap1/Scp2/cpx/Gdi/nemy/Rab3/tsr/CG9650/sky/Hsc70-4/Frq2/RabX4/Rab11/CaMKII/wls/CG5021/nSyb/bai/IA-2/eca/Chc/p24-1/CHOp24/rho-5/Glut1/Tomosyn/GABA-B-R2/Sar1/unc-13-4A/Nrx-IV/cmpy/CG10098/veli/Snx3/ksh/Ih/Syx1A/Dys/cac/S/puc/AdipoR/Syx6/Fife/Exn/Syt12/Rim/CG31475/CanB2/Sytbeta/NFAT/Syt4/CanB/Dh31/brp/eIF3m/Flo2/Cadps/Snap25/CG15537/jagn/Rop/nej/Akt1/Syn/Cirl/Rab6/unc-13/corn/Rab26/Ehbp1/Syx13…	108		Male.marker.genes	GO:0030016	myofibril	30/2364	66/11938	2.01269e-06	1.10698e-05	5.75713e-06	Tpi/Pgk/mbl/Pglym78/Gapdh1/Msp300/Hsp67Bc/Hsc70-4/zip/mask/Dg/robo3/Smn/CG14207/Lmpt/CG17839/DAAM/rhea/Tm1/CG43707/stv/sals/Scgdelta/up/CG1674/STUB1/twf/kon/tn/RyR	30
Male.marker.genes	GO:0000980	RNA polymerase II distal enhancer sequence-specific DNA binding	14/2323	26/12127	8.09584e-05	0.000563226	0.000379363	abd-A/Ubx/Abd-B/Antp/pan/Mad/tup/vvl/hb/sd/ey/aop/pho/en	14		Male.marker.genes	GO:0045165	cell fate commitment	129/2449	314/12275	3.20946e-18	9.95968e-17	4.92589e-17	hth/abd-A/Ubx/Abd-B/Antp/14-3-3zeta/Blimp-1/Wnt4/bi/ap/ham/14-3-3epsilon/klg/emc/pyd/CkIIalpha/Mmp2/noc/Rab11/elB/tsu/pros/zip/cnn/aPKC/shot/nkd/enc/rin/Lis-1/Gbeta13F/ed/Dhc64C/Sox102F/mam/cdi/ths/Smn/stan/br/S/pan/kuz/numb/lola/Src64B/Socs36E/bib/rho/orb/Rala/nuf/msi/spen/HnRNP-K/AGO1/chn/phyl/Mad/Klp98A/EcR/jeb/kay/brat/wake/vn/spg/Apc/Src42A/caup/ara/tup/yki/simj/robo2/skd/nej/bun/osa/eas/Dab…	129		Male.marker.genes	GO:0099081	supramolecular polymer	67/2364	198/11938	2.06665e-06	1.12444e-05	5.84791e-06	Tpi/Pgk/betaTub56D/mbl/Pglym78/Gapdh1/Msp300/Hsp67Bc/alphaTub84B/Hsc70-4/sqh/futsch/zip/shot/mask/Lis-1/Dg/Dhc64C/awd/Jupiter/ringer/pigs/CG14535/robo3/Smn/klar/CG14207/Lmpt/CG17839/Lk6/Klp98A/DAAM/tau/rhea/Apc/pod1/Cortactin/CLIP-190/Moe/Vrp1/chb/Tm1/alphaTub84D/tacc/Kif3C/Kank/Ran/CG43707/unc-104/Khc-73/stv/sals/gammaTub23C/Tctp/Arp3/capu/Scgdelta/hts/up/CG1674/STUB1/twf/Lam/CG6891/kon/tn/RyR	67
Male.marker.genes	GO:0003713	transcription coactivator activity	27/2323	69/12127	9.00213e-05	0.000619615	0.000417344	Ssb-c31a/Eip75B/CG17202/mam/Taf11/tna/tai/DOR/Mad/EcR/TfIIA-S/mnb/shn/yki/nej/Bgb/NC2beta/CtBP/arm/mbf1/exd/e(y)2/Mrtf/Lpin/MED4/CG13204/CG10555	27		Male.marker.genes	GO:0009967	positive regulation of signal transduction	144/2449	366/12275	3.45805e-18	1.06169e-16	5.25096e-17	DENR/Imp/14-3-3zeta/Mp/sun/14-3-3epsilon/hbs/CG43658/put/pyd/Akap200/TyrR/CkIIalpha/Snoo/Efa6/Actbeta/wls/fra/Cow/Socs16D/tok/Lis-1/Tsp86D/ed/DopEcR/Ubr3/cmpy/Oct-TyrR/smt3/Diap1/Pp1-87B/Alg-2/dlp/Rheb/CG14184/asrij/msn/Pka-C1/Prosap/S/crb/Src64B/tld/Exn/flw/bib/rho/erm/mbc/spen/dally/Alk/siz/Gprk1/ttv/jeb/Dyrk2/Gprk2/Pdk1/vn/Nplp1/Pde8/Rac1/poly/sNPF/Ret/CycG/spg/Csk/CG42674/Flo2/rdx/Pli/cv-2/Hi…	144		Male.marker.genes	GO:0045177	apical part of cell	56/2364	157/11938	2.24427e-06	1.20808e-05	6.28294e-06	Btk29A/app/sosie/hbs/pyd/sqh/pros/zip/aPKC/Ca-alpha1D/Dap160/mgl/Spn/Pde6/sdt/boca/cdi/Mbs/cac/crb/cindr/rho/nuf/Ptp10D/dally/kek1/CG42684/sty/brat/Syt4/sdk/Apc/rst/Abl/Chmp1/Moe/mew/RhoGAP71E/sano/corn/dlg1/Stat92E/arm/Dl/btsz/wts/Rab35/Arpc2/wun/ZnT63C/Rho1/baz/kibra/sds22/Ptp4E/dome	56
Male.marker.genes	GO:0017147	Wnt-protein binding	11/2323	18/12127	0.000104234	0.000709886	0.000478147	wls/Cow/drl/Nrk/fz2/dlp/arr/Drl-2/otk/otk2/fz	11		Male.marker.genes	GO:0071495	cellular response to endogenous stimulus	104/2449	232/12275	4.22791e-18	1.27101e-16	6.28623e-17	DENR/PyK/Blimp-1/Nurf-38/put/Hr4/Eip75B/TyrR/Mmp2/Snoo/fra/Lis-1/mAChR-A/Oatp74D/Tl/cmpy/smt3/lwr/ths/dlp/wit/Rheb/CG14184/eIF4A/br/tai/Src64B/AdipoR/Dad/tld/ftz-f1/DOR/kek5/dally/ttv/sty/Mad/Smox/EcR/Hr38/Sik3/Sirt1/Pdk1/poly/sfl/CycG/Crtc/Sesn/shn/cv-2/G9a/CG15537/mAChR-B/Dh44-R2/sima/Akt1/gro/Smurf/bnl/mav/Sh/E(bx)/Roc1a/sxc/wrd/Dh44-R1/csw/Utx/foxo/lqf/Dop1R2/HDAC4/wdb/pyr/InR/SIFaR/cbt/SkpA/…	104		Male.marker.genes	GO:0034703	cation channel complex	27/2364	57/11938	2.43053e-06	1.29458e-05	6.73276e-06	Ca-alpha1T/CG4587/Ca-alpha1D/para/GluRIB/GluRIA/Shawl/cac/eag/NaCP60E/CG42260/Hk/Cngl/Shaw/Trpgamma/Trpm/Shab/EMRE/Shal/Sh/MCU/unc80/KCNQ/Ca-beta/Elk/Nmdar1/RyR	27
Male.marker.genes	GO:0015267	channel activity	72/2323	249/12127	0.000111342	0.00074266	0.000500221	porin/fwe/Nckx30C/Ca-alpha1T/CG42594/nAChRbeta2/nAChRalpha2/CG4587/shakB/Rdl/Ca-alpha1D/CG15270/para/tty/Nmdar2/CG1090/nAChRalpha3/CG1688/GluRIB/GluRIA/Shawl/CG42340/pHCl-1/CG10470/Task7/GluClalpha/Ih/nAChRalpha6/nAChRalpha7/cac/eag/NaCP60E/CG42260/jp/tipE/Hk/bib/SK/Cngl/CG3638/nAChRalpha1/Mid1/nAChRalpha5/Shaw/Trpgamma/Trpm/Shab/Shal/Best1/SLO2/Sh/nAChRbeta1/slo/Lcch3/MCU/unc80/CG11155/KCNQ/stj/…	72		Male.marker.genes	GO:0098657	import into cell	104/2449	232/12275	4.22791e-18	1.27101e-16	6.28623e-17	fwe/nrv3/pyd/nrv2/Rab11/PIP4K/Atpalpha/Nrx-1/faf/Nhe3/Fer2LCH/CD98hc/drpr/Chc/Dap160/Nlg4/Lis-1/mgl/Pxn/sdt/Fer1HCH/CaBP1/mnd/w/CG32683/Nlg2/norpA/numb/rudhira/cindr/Nlg3/Dscam1/EcR/Gprk2/brat/Mid1/Galphaq/JhI-21/Pkc53E/Rac1/rhea/LpR1/mnb/ktub/spri/Cortactin/Moe/Vrp1/Src42A/Dab/Smurf/Tsp42Ej/RhoBTB/EndoB/Zir/hep/mim/CG41099/CASK/Rab14/BicD/Syt1/csw/stj/Nedd4/nsl1/lqf/comm/scrib/shi/Rab35/Arf102F/…	104		Male.marker.genes	GO:0099080	supramolecular complex	67/2364	200/11938	3.07053e-06	1.61843e-05	8.41704e-06	Tpi/Pgk/betaTub56D/mbl/Pglym78/Gapdh1/Msp300/Hsp67Bc/alphaTub84B/Hsc70-4/sqh/futsch/zip/shot/mask/Lis-1/Dg/Dhc64C/awd/Jupiter/ringer/pigs/CG14535/robo3/Smn/klar/CG14207/Lmpt/CG17839/Lk6/Klp98A/DAAM/tau/rhea/Apc/pod1/Cortactin/CLIP-190/Moe/Vrp1/chb/Tm1/alphaTub84D/tacc/Kif3C/Kank/Ran/CG43707/unc-104/Khc-73/stv/sals/gammaTub23C/Tctp/Arp3/capu/Scgdelta/hts/up/CG1674/STUB1/twf/Lam/CG6891/kon/tn/RyR	67
Male.marker.genes	GO:0022803	passive transmembrane transporter activity	72/2323	249/12127	0.000111342	0.00074266	0.000500221	porin/fwe/Nckx30C/Ca-alpha1T/CG42594/nAChRbeta2/nAChRalpha2/CG4587/shakB/Rdl/Ca-alpha1D/CG15270/para/tty/Nmdar2/CG1090/nAChRalpha3/CG1688/GluRIB/GluRIA/Shawl/CG42340/pHCl-1/CG10470/Task7/GluClalpha/Ih/nAChRalpha6/nAChRalpha7/cac/eag/NaCP60E/CG42260/jp/tipE/Hk/bib/SK/Cngl/CG3638/nAChRalpha1/Mid1/nAChRalpha5/Shaw/Trpgamma/Trpm/Shab/Shal/Best1/SLO2/Sh/nAChRbeta1/slo/Lcch3/MCU/unc80/CG11155/KCNQ/stj/…	72		Male.marker.genes	GO:0050803	regulation of synapse structure or activity	89/2449	185/12275	4.45882e-18	1.32661e-16	6.56121e-17	nwk/Sod1/Syp/put/Rab11/CaMKII/Cals/Nrx-1/Sdc/futsch/Ten-a/Actbeta/drpr/Ten-m/Dg/DIP-gamma/Sar1/Galphao/dpr11/Fas2/Spn/Syn1/veli/stan/wit/Rheb/Octbeta2R/Nlg2/cac/Src64B/Dad/nmo/Mad/Smox/dysc/plum/brat/ena/VGlut/Octbeta1R/Rac1/Ank2/pum/Liprin-gamma/mnb/Abl/Src42A/simj/Shab/Atg1/kis/trio/Akt1/Fak/ND-20/mav/sif/Sh/slo/Mob2/CG11155/CASK/dlg1/unc-104/Pak3/Syt1/stj/Khc-73/Nedd4/metro/scrib/shi/Cip4/SkpA…	89		Male.marker.genes	GO:0098552	side of membrane	29/2364	64/11938	3.21229e-06	1.67569e-05	8.71485e-06	Ggamma30A/Mmp2/Spp/Toll-7/Gbeta13F/Galphao/Tl/Galphas/dlp/qvr/Src64B/Rgk3/Gfrl/dally/sty/Gprk2/Galphaq/RpS26/Pli/gish/Src42A/trio/Rgk2/Rgk1/Stat92E/Rab35/baz/ave/kibra	29
Male.marker.genes	GO:0009975	cyclase activity	15/2323	30/12127	0.000136694	0.000902462	0.000607857	Rtca/Gycalpha99B/Ac78C/Gycbeta100B/Ac3/CG31183/Gyc89Db/Ac13E/CG34357/rut/Ac76E/CG43373/CG10738/Gyc32E/Gyc88E	15		Male.marker.genes	GO:0090066	regulation of anatomical structure size	111/2449	255/12275	4.6921e-18	1.38178e-16	6.83404e-17	Btk29A/path/nwk/kune/pasi2/chinmo/bru1/Pvf3/crim/pasi1/Lar/cold/Lac/nrv2/pck/sqh/Arpc5/Atpalpha/CadN/Actbeta/Nrg/zip/shot/svr/Chc/Hs3st-B/Sema1a/Fas2/Nrx-IV/Arpc4/Arpc3A/stan/Arpc1/Rheb/IRSp53/kuz/lola/lilli/Src64B/bib/Alk/Smox/EcR/ena/Pdk1/spir/DAAM/Phm/Rac1/sNPF/Abl/Cortactin/fru/gish/Vrp1/pico/Akt1/bif/Kank/tnc/chic/Best1/ab/mav/sano/fz/RhoBTB/PsGEF/icln/RhoGAPp190/H/hppy/RasGAP1/foxo/Nipped-B…	111		Male.marker.genes	GO:0044433	cytoplasmic vesicle part	52/2364	144/11938	3.37196e-06	1.74103e-05	9.05468e-06	VGAT/CG32225/fwe/Rab11/Vps24/wls/Chc/Lamp1/olf413/Sar1/Tbh/CG14184/w/S/Syx6/rho/nuf/shrb/CG1275/VGlut/Chmp1/Syn/VAChT/unc-13/Atet/Vps20/Trs31/BicD/Syt1/lqf/prt/Dop1R2/comm/AP-1sigma/Snap24/Rab35/AP-2sigma/Syngr/Vta1/CG5946/Rph/CG9132/LTV1/Vsp37A/Afti/AP-2mu/Sec22/CG14812/CG6707/Rab7/RyR/Sec16	52
Male.marker.genes	GO:0042626	ATPase activity, coupled to transmembrane movement of substances	38/2323	112/12127	0.000147435	0.000953905	0.000642506	ATPsynbeta/nrv3/blw/sun/Vha26/SPoCk/ATPsynB/VhaAC45/nrv2/Atpalpha/PMCA/Vha16-1/Vha68-1/VhaPPA1-1/SERCA/CG31030/w/CG3164/ATPsynG/ATPsynC/ATPsyndelta/ATPsyngamma/ATPsynD/ATPsynO/ATPsynE/Atet/rdgB/Vha13/Vha36-1/VhaM9.7-b/Vha14-1/Vha44/Vha55/CG32091/VhaSFD/VhaAC39-1/CG17646/MRP	38		Male.marker.genes	GO:0006163	purine nucleotide metabolic process	112/2449	259/12275	6.0488e-18	1.76332e-16	8.72108e-17	ND-SGDH/ND-42/CG7920/ND-ASHI/ND-B14.5B/ND-15/Tpi/Pgk/SdhB/scu/SdhC/Cyt-c1/ND-19/UQCR-C2/ND-B12/ND-PDSW/UQCR-C1/ATPsynbeta/COX5A/COX4/UQCR-14/CG14757/Cyt-c-p/PyK/sesB/Pglym78/Eno/Gapdh2/Gapdh1/blw/UQCR-Q/ATPsynCF6/cype/sun/COX5B/UQCR-6.4/ND-13A/ATPsynB/COX7C/PlexA/Vha68-1/Dg/Gycalpha99B/Nos/awd/Pde6/COX7A/Scox/CG5065/Pde1c/Hex-A/Pde11/CG7834/Pde8/Ac78C/Pde9/Gycbeta100B/ATPsynG/levy/ATPsynC/RFeSP/A…	112		Male.marker.genes	GO:0044295	axonal growth cone	11/2364	14/11938	3.60899e-06	1.8446e-05	9.59328e-06	Trim9/Rtnl1/Con/fra/shot/robo1/erm/DAAM/NetB/CLIP-190/kra	11
Male.marker.genes	GO:0043492	ATPase activity, coupled to movement of substances	38/2323	112/12127	0.000147435	0.000953905	0.000642506	ATPsynbeta/nrv3/blw/sun/Vha26/SPoCk/ATPsynB/VhaAC45/nrv2/Atpalpha/PMCA/Vha16-1/Vha68-1/VhaPPA1-1/SERCA/CG31030/w/CG3164/ATPsynG/ATPsynC/ATPsyndelta/ATPsyngamma/ATPsynD/ATPsynO/ATPsynE/Atet/rdgB/Vha13/Vha36-1/VhaM9.7-b/Vha14-1/Vha44/Vha55/CG32091/VhaSFD/VhaAC39-1/CG17646/MRP	38		Male.marker.genes	GO:0007424	open tracheal system development	107/2449	243/12275	6.86781e-18	1.98205e-16	9.80289e-17	Btk29A/Ubx/Abd-B/Blimp-1/Vha26/hdc/ct/kune/pasi2/trn/crim/pasi1/put/pyd/cold/Lac/nrv2/pck/caps/Mmp2/noc/elB/sqh/Atpalpha/Sdc/Nrg/zip/aPKC/shot/sli/VhaPPA1-1/Chc/ed/robo1/Dhc64C/Fas2/Nrx-IV/awd/bou/Smn/dlp/stan/Rheb/klar/crb/pan/kug/Src64B/Dlic/Mkp3/rho/hid/Ptp10D/dally/lolal/sty/Trf2/jing/DAAM/Rac1/sr/rhea/sfl/Moe/Hs6st/Src42A/robo2/mew/Akt1/CCT3/bnl/salm/sano/fz/Stat92E/csw/arm/cv-c/cora/btsz/sh…	107		Male.marker.genes	GO:0005892	acetylcholine-gated channel complex	9/2364	10/11938	3.80342e-06	1.90548e-05	9.9099e-06	nAChRbeta2/nAChRalpha2/nAChRalpha3/nAChRalpha6/nAChRalpha7/nAChRalpha1/nAChRalpha5/nAChRbeta1/nAChRalpha4	9
Male.marker.genes	GO:0051082	unfolded protein binding	33/2323	93/12127	0.000151002	0.000967312	0.000651537	Pfdn1/CG11267/Hsp23/Hsp67Ba/Hsp67Bc/Hsp26/Hsp27/Hsc70-4/CCT4/Calr/Hsp83/Hsc70-3/RIC-3/Cyp1/CG2852/Pfdn5/Pfdn4/Pfdn6/Gp93/nudC/CG14207/Tpr2/jdp/CCT3/Hsp60A/Hsc70-5/Pfdn2/Cnx99A/DnaJ-H/cyp33/Hsp68/CG5071/CG14483	33		Male.marker.genes	GO:0098742	cell-cell adhesion via plasma-membrane adhesion molecules	48/2449	72/12275	8.15479e-18	2.33017e-16	1.15246e-16	Cad87A/beat-Vc/beat-IIIb/hbs/klg/Fas3/Lar/beat-VI/Lac/caps/glec/beat-IV/Cont/CadN/Cals/Bsg/tutl/Dscam2/Con/CG7166/beat-Ic/beat-IIb/beat-Va/CadN2/ed/sns/Fas1/beat-VII/Fas2/stan/beat-Ib/CG44153/kug/beat-IIa/beat-Ia/beat-IIIc/Dscam3/sdk/Dscam4/rst/kirre/mew/fz/shg/beat-Vb/CG13506/baz/ImpL2	48		Male.marker.genes	GO:0072546	ER membrane protein complex	9/2364	10/11938	3.80342e-06	1.90548e-05	9.9099e-06	CG8397/EMC3/EMC1/CG32441/CG15168/CG11137/CG3678/EMC8-9/CG17556	9
Male.marker.genes	GO:0008187	poly-pyrimidine tract binding	10/2323	16/12127	0.000168035	0.00104537	0.000704115	Rbp6/fne/shep/CG4612/Hrb27C/ssx/Sxl/hfp/pAbp/elav	10		Male.marker.genes	GO:0007169	transmembrane receptor protein tyrosine kinase signaling pathway	92/2449	196/12275	9.34968e-18	2.64541e-16	1.30838e-16	DENR/14-3-3zeta/Pvf3/Mmp2/Socs16D/rho-5/mask/ed/drl/Nrk/Tl/Fas2/smal/cdi/ths/dlp/Rheb/S/Gug/Src64B/Ephrin/Socs36E/Mkp3/rho/mbc/Drl-2/spen/Ptp10D/dally/kek1/Alk/phyl/cic/sty/Sik3/Pdk1/vn/Rac1/poly/Ret/pum/sfl/CycG/spg/Ddr/Src42A/PVRAP/sima/Akt1/Dab/gro/bnl/hep/Roc1a/sxc/tay/wrd/dlg1/csw/Ptpmeg/Reph/hppy/RasGAP1/foxo/ey/HDAC4/wdb/scrib/Sulf1/pyr/InR/SkpA/Pp2A-29B/aop/CG3277/trol/Pvr/Ilp7/ImpL2/Graf…	92		Male.marker.genes	GO:0030017	sarcomere	28/2364	62/11938	5.12615e-06	2.54297e-05	1.32254e-05	Tpi/Pgk/mbl/Pglym78/Gapdh1/Msp300/Hsp67Bc/Hsc70-4/zip/mask/Dg/robo3/Smn/CG14207/Lmpt/CG17839/DAAM/rhea/Tm1/CG43707/stv/sals/up/CG1674/STUB1/kon/tn/RyR	28
Male.marker.genes	GO:0030371	translation repressor activity	10/2323	16/12127	0.000168035	0.00104537	0.000704115	eIF4EHP/orb/msi/orb2/brat/heph/pum/Sxl/elav/Paip2	10		Male.marker.genes	GO:0001751	compound eye photoreceptor cell differentiation	86/2449	178/12275	1.16939e-17	3.27657e-16	1.62054e-16	hth/mbl/tsr/hbs/klg/Lar/emc/noc/Rab11/elB/CSN5/CadN/Cam/tutl/pros/Ten-m/rin/EMC3/SP2353/CadN2/mask/Lis-1/ed/Nrk/cdi/stan/CSN4/klar/br/Mbs/S/crb/lola/lilli/Src64B/vimar/Socs36E/eys/rho/Rala/msi/Alk/phyl/sty/jeb/kay/dysc/Rac1/tau/spg/PDZ-GEF/Moe/Src42A/RhoGAP100F/nej/bun/Dab/dac/salm/Optix/fz/Rab6/Mob2/csw/RasGAP1/B-H1/B-H2/pAbp/scrib/wts/AP-1sigma/neur/oc/p47/aop/capt/sv/Liprin-alpha/ato/Amph/pnt/…	86		Male.marker.genes	GO:0044448	cell cortex part	43/2364	114/11938	6.5401e-06	3.2129e-05	1.67095e-05	app/Syp/Sep2/sqh/Sep4/Bsg/Ten-a/pros/zip/aPKC/Dap160/Rbp/Spn/sdt/Mbs/Fife/cindr/Rim/nuf/CG42684/brat/brp/Abl/Cortactin/Vrp1/yki/Tm1/sano/unc-13/dlg1/Dl/wts/Rab35/Sep1/strat/capt/Arpc2/pnut/Rho1/baz/Arp3/kibra/CG6891	43
Male.marker.genes	GO:0090079	translation regulator activity, nucleic acid binding	10/2323	16/12127	0.000168035	0.00104537	0.000704115	orb/bol/msi/orb2/heph/pum/P32/Sxl/elav/Paip2	10		Male.marker.genes	GO:0061061	muscle structure development	105/2449	238/12275	1.18878e-17	3.29887e-16	1.63156e-16	Scgbeta/Tpi/Pgk/betaTub56D/hth/mbl/abd-A/Ubx/Abd-B/Antp/PyK/Pglym78/Gapdh1/Msp300/ap/hbs/mspo/bru1/SelR/Bsg/zip/shot/crp/mask/Dg/ed/drl/sns/Tl/ths/SmD3/Smn/klar/br/Dys/kuz/Gug/numb/lola/Dad/CAP/CanB2/mbc/Alk/siz/chn/sty/jeb/DAAM/Rac1/C3G/sr/rhea/rst/kirre/fru/Vrp1/caup/ara/tup/Mef2/mew/skd/Akt1/salm/ab/C1GalTA/Alh/sd/Pak3/Stat92E/Mical/wech/Nedd4/nsl1/foxo/cora/pcs/Sin3A/pyr/exd/InR/Pax/zfh1/aop/…	105		Male.marker.genes	GO:0061174	type I terminal bouton	16/2364	27/11938	7.40839e-06	3.60447e-05	1.87459e-05	cpx/Nrx-1/Fas2/kek6/Alk/jeb/ena/Atg8a/pum/Fak/CASK/dlg1/metro/EndoA/Pldn/Synd	16
Male.marker.genes	GO:0046983	protein dimerization activity	104/2323	392/12127	0.000177425	0.00109327	0.000736379	Tpi/dsx/14-3-3zeta/Sod1/Ggamma30A/14-3-3epsilon/emc/Lac/Sep2/trsn/CadN/ctp/Ten-a/crp/Ten-m/CadN2/GABA-B-R2/drl/GABA-B-R1/Rpb11/Oli/Task7/Taf11/His3.3B/tai/ftz-f1/Dlc90F/REPTOR/corto/Drl-2/Ace/trx/Dscam1/lolal/otk/FoxP/EcR/kay/Mitf/Fer2/bru3/Liprin-gamma/otk2/rdx/Atf6/Taf12/Fer1/Mef2/robo2/His4r/mew/His2Av/bun/sima/Taf4/rpr/MBD-like/Gyc89Db/Bgb/mim/NC2beta/mod(mdg4)/GstO2/CtBP/Pak3/Syt1/da/Khc-73/…	104		Male.marker.genes	GO:0060541	respiratory system development	109/2449	252/12275	1.65916e-17	4.56031e-16	2.25545e-16	Btk29A/Ubx/Abd-B/Blimp-1/Vha26/hdc/ct/kune/pasi2/trn/crim/pasi1/put/pyd/cold/Lac/nrv2/pck/caps/Mmp2/noc/elB/sqh/Atpalpha/Sdc/Nrg/zip/aPKC/shot/sli/VhaPPA1-1/Chc/ed/robo1/Dhc64C/Fas2/Nrx-IV/awd/bou/Smn/dlp/stan/Rheb/klar/crb/pan/kug/Src64B/Dlic/Mkp3/rho/hid/Ptp10D/dally/lolal/sty/Trf2/jing/DAAM/Rac1/sr/rhea/sfl/Moe/Hs6st/Src42A/robo2/mew/sima/Akt1/CCT3/Ccm3/bnl/salm/sano/fz/Stat92E/csw/arm/cv-c/co…	109		Male.marker.genes	GO:0005918	septate junction	18/2364	33/11938	9.916e-06	4.77857e-05	2.48521e-05	kune/Fas3/crim/Lac/nrv2/pck/Cont/Atpalpha/Nrg/Nrx-IV/sdt/yrt/dlg1/cora/scrib/CG45049/wun/vari	18
Male.marker.genes	GO:0008047	enzyme activator activity	45/2323	141/12127	0.000194459	0.00118693	0.000799465	nrv3/sky/RapGAP1/plx/nrv2/7B2/PlexA/Dhit/Tomosyn/mats/CenG1A/norpA/vimar/CG42795/rad/Evi5/jeb/Pdk1/drongo/Cks85A/RpLP1/CG32506/RhoGAP102A/RhoGAP100F/RhoGAP19D/RhoGAP71E/wrd/RhoGAPp190/RhoGAP93B/cv-c/wdb/CycT/Frq1/Cdk5alpha/CG7394/Vta1/ASPP/alphaSnap/Graf/GAPcenA/CG5916/ric8a/REG/Rlip/CG7324	45		Male.marker.genes	GO:0048585	negative regulation of response to stimulus	146/2449	379/12275	1.83332e-17	4.99147e-16	2.4687e-16	Rtca/Cbp53E/chrb/wry/CG10257/Hr4/pyd/RapGAP1/BI-1/Mmp2/Snoo/Cam/faf/Cow/Bili/nkd/Dap160/rho-5/SP2353/Gbeta13F/ed/Sema1a/Tl/Fas2/cmpy/Nca/lwr/cdi/Rheb/SoxN/eIF4A/qvr/dnc/CG32683/Pka-C1/crb/Gug/puc/numb/LRR/Dad/Socs36E/Mkp3/flw/kek5/Rala/Dsp1/nmo/Ptp10D/dally/Smr/kek1/crol/CG42684/Gprk1/otk/phyl/sty/Sik3/Gprk2/Galphaq/Fer2/Pde8/pum/mnb/CycG/Apc/Sesn/rdx/Pli/Hipk/Src42A/CG15537/ATPsynD/Atg1/nej/Akt1…	146		Male.marker.genes	GO:0005753	mitochondrial proton-transporting ATP synthase complex	15/2364	25/11938	1.16582e-05	5.51313e-05	2.86724e-05	ATPsynF/ATPsynbeta/blw/ATPsynCF6/sun/Neb-cGP/ATPsynB/ATPsynG/ATPsynC/ATPsyndelta/ATPsyngamma/ATPsynD/ATPsynO/ATPsynE/CG10731	15
Male.marker.genes	GO:0004713	protein tyrosine kinase activity	16/2323	34/12127	0.000203487	0.00123043	0.00082876	Btk29A/Nrk/Src64B/Alk/otk/Ret/Csk/Abl/Ddr/Hipk/Src42A/Fak/InR/CG3277/Pvr/ninaC	16		Male.marker.genes	GO:0051093	negative regulation of developmental process	99/2449	220/12275	1.97543e-17	5.32811e-16	2.6352e-16	Rtca/COX5A/COX4/UQCR-14/Abd-B/tsh/nwk/COX7C/hdc/Syp/put/emc/Snoo/CSN5/CadN/pros/rin/Bruce/ed/Hs3st-B/Sema1a/Galphao/Tl/Fas2/Spn/lwr/cdi/Diap1/klar/norpA/crb/RASSF8/numb/Src64B/Dad/Socs36E/bab1/erm/chn/sty/Mad/EcR/plum/brat/ena/Galphaq/CG7834/Octbeta1R/sdk/Liprin-gamma/Csk/Apc/Abl/shn/Src42A/CG5214/bun/osa/Akt1/Fak/bif/salm/C1GalTA/Mob2/MED22/MED10/dlg1/unc-104/sd/Stat92E/Ptpmeg/stj/RasGAP1/foxo/l…	99		Male.marker.genes	GO:0045259	proton-transporting ATP synthase complex	15/2364	25/11938	1.16582e-05	5.51313e-05	2.86724e-05	ATPsynF/ATPsynbeta/blw/ATPsynCF6/sun/Neb-cGP/ATPsynB/ATPsynG/ATPsynC/ATPsyndelta/ATPsyngamma/ATPsynD/ATPsynO/ATPsynE/CG10731	15
Male.marker.genes	GO:0044877	protein-containing complex binding	72/2323	254/12127	0.000216835	0.001299	0.000874949	Rpn11/Msp300/put/plx/Akap200/Rab11/Arpc5/zip/Mtor/eIF4H1/Lis-1/Galphao/Spn/smal/Galphas/Arpc3A/Arpc1/His3.3B/kug/tld/orb/eEF5/Ccn/RpS21/orb2/Trf2/Galphaq/poly/pix/rhea/Ret/RpLP1/sta/Ddr/pod1/Cortactin/Vrp1/Tm1/eIF1/His2Av/bif/Taf4/kra/P32/LpR2/BicD/sn/Mi-2/Svil/CG17514/Rad23/e(y)2/loqs/Prp31/sals/Arpc2/sog/Ilp7/barc/CG5989/eEF2/Arp3/Nak/Afti/hts/Rack1/twf/Rab1/Rab7/CG6891/Arp6/dock	72		Male.marker.genes	GO:0098662	inorganic cation transmembrane transport	87/2449	183/12275	2.7114e-17	7.24545e-16	3.58348e-16	Cyt-c1/ATPsynF/ATPsynbeta/fwe/nrv3/blw/ATPsynCF6/sun/COX5B/Vha26/SPoCk/ATPsynB/Nckx30C/Ca-alpha1T/CG42594/VhaAC45/nrv2/Atpalpha/PMCA/Vha16-1/Nhe3/Vha68-1/CG6329/Fer2LCH/VhaPPA1-1/Ca-alpha1D/para/CG1090/Ndae1/Sec61alpha/CG1688/SERCA/Shawl/Fer1HCH/CG42340/Ostgamma/CG31030/Task7/qvr/cac/eag/NaCP60E/Rgk3/SK/Mid1/Plc21C/Shaw/Trpgamma/ATPsynG/ATPsynC/Shab/ATPsyndelta/ATPsyngamma/ATPsynD/EMRE/ATPsynO/Rg…	87		Male.marker.genes	GO:0036477	somatodendritic compartment	82/2364	267/11938	1.20032e-05	5.62374e-05	2.92477e-05	Rpn8/path/Cbp53E/Imp/VGAT/kcc/hdc/klg/Mmp2/RabX4/hig/Rab11/CadN/CaMKII/futsch/Ten-a/Rdl/fra/CG7166/RIC-3/Ten-m/Lis-1/mAChR-A/robo1/drl/5-HT1A/Spn/ringer/Shawl/X11Lbeta/nAChRalpha7/Pka-C1/Prosap/Myo10A/bol/erm/rad/SK/Dscam1/shrb/EcR/plum/orb2/brat/ena/sNPF/5-HT7/tau/Ret/NetB/Shaw/Trpgamma/ktub/mtt/Oamb/Dop1R1/mAChR-B/5-HT2A/5-HT1B/Akt1/kra/slo/Rab6/PlexB/Rab14/unc-104/sn/shi/Rab35/Rab4/Cdk5alpha/C…	82
Male.marker.genes	GO:0030276	clathrin binding	12/2323	22/12127	0.000225137	0.00133636	0.000900112	Chc/Syt12/Sytbeta/Syt4/rhea/BicD/Syt1/Syt7/AP-1sigma/AP-2sigma/Afti/AP-2mu	12		Male.marker.genes	GO:0046034	ATP metabolic process	77/2449	153/12275	3.13633e-17	8.30409e-16	4.10707e-16	ND-SGDH/ND-42/ND-ASHI/ND-B14.5B/ND-15/Tpi/Pgk/SdhB/SdhC/Cyt-c1/ND-19/UQCR-C2/ND-B12/ND-PDSW/UQCR-C1/ATPsynbeta/COX5A/COX4/UQCR-14/CG14757/Cyt-c-p/PyK/sesB/Pglym78/Eno/Gapdh2/Gapdh1/blw/UQCR-Q/ATPsynCF6/cype/sun/COX5B/UQCR-6.4/ND-13A/ATPsynB/COX7C/Vha68-1/Dg/COX7A/Scox/Hex-A/CG7834/ATPsynG/levy/ATPsynC/RFeSP/ATPsyndelta/ND-MLRQ/ATPsyngamma/ND-39/ATPsynD/ND-B15/ATPsynO/ND-B17.2/ND-B14/ND-23/SdhA/ND…	77		Male.marker.genes	GO:0043292	contractile fiber	30/2364	71/11938	1.23506e-05	5.73338e-05	2.98179e-05	Tpi/Pgk/mbl/Pglym78/Gapdh1/Msp300/Hsp67Bc/Hsc70-4/zip/mask/Dg/robo3/Smn/CG14207/Lmpt/CG17839/DAAM/rhea/Tm1/CG43707/stv/sals/Scgdelta/up/CG1674/STUB1/twf/kon/tn/RyR	30
Male.marker.genes	GO:0008289	lipid binding	50/2323	163/12127	0.00026213	0.0015418	0.00103849	fabp/nwk/mGluR/Efa6/CG6329/drpr/DopEcR/Snx3/IRSp53/qvr/Syt12/Gprk1/Klp98A/EcR/Gprk2/AnxB11/Sytbeta/CG8726/Syt4/Moe/Akt1/rpr/unc-119/EndoB/unc-13/PsGEF/mim/rdgB/Syt1/Syt7/cv-c/Dl/Cip4/neur/rdgBbeta/EndoA/Myo31DF/Rph/baz/Graf/ninaC/Nup62/gce/Npc2a/Amph/CG15602/cert/SCAP/apolpp/Synd	50		Male.marker.genes	GO:0016049	cell growth	78/2449	156/12275	3.16912e-17	8.31462e-16	4.11227e-16	mRpL12/path/Torsin/hdc/Lar/Rab11/PIP4K/sqh/CadN/Nrg/shot/poe/CadN2/Sema1a/Tl/Frl/cmpy/fz2/eIF4E1/stan/Rheb/dnc/Pka-C1/Mbs/pan/kuz/eag/tai/CG9328/arr/Dad/Dscam1/cic/kay/Pdk1/DAAM/Rac1/Ank2/pix/Sesn/spri/jagn/Atg1/RhoGAP100F/trio/bun/sima/Akt1/bif/chic/fz/Sh/hep/Ptpmeg/foxo/hfp/arm/ey/Hr51/rut/dco/InR/raw/spidey/fkh/cno/shg/Rho1/Myc/Liprin-alpha/bsk/vg/Paip2/tkv/Vang/Sema2a/Thor/CG15019	78		Male.marker.genes	GO:0022626	cytosolic ribosome	65/2364	200/11938	1.31817e-05	6.06359e-05	3.15352e-05	MCTS1/RpS3A/RpS23/RpL19/RpL26/RpL15/RpS9/RpL36/RpL23/RpL31/RpL12/RpL41/RpS6/RpS21/RpL28/RpS20/RpL39/RpL23A/RpS7/RpL32/RpL37A/RpLP0/RpL38/RpL29/RpL35/RpL5/RpLP1/RpL27/sta/RpS26/RpL8/RpS4/RpS12/RpS27/RpS29/RpS16/RpS8/RpS25/RpS15/RpL35A/RpL13/RpL7/RpL4/RpL18/RpL30/RpL7A/RpL36A/RpL11/RpS19a/RpL24/RpL14/RpS30/RpL24-like/RpS28b/LTV1/CG5071/RpL9/RpL6/RpL18A/RpS14a/Rack1/RpS13/RpS15Aa/RpL34a/RpS24	65
Male.marker.genes	GO:0036442	proton-exporting ATPase activity	17/2323	38/12127	0.000277598	0.00161807	0.00108986	ATPsynbeta/Vha26/SPoCk/VhaAC45/Vha16-1/Vha68-1/VhaPPA1-1/SERCA/CG31030/Vha13/Vha36-1/VhaM9.7-b/Vha14-1/Vha44/Vha55/VhaSFD/VhaAC39-1	17		Male.marker.genes	GO:0009719	response to endogenous stimulus	112/2449	264/12275	3.38727e-17	8.77081e-16	4.3379e-16	Idh3b/DENR/PyK/Blimp-1/Nurf-38/put/Hr4/Eip75B/TyrR/Mmp2/Snoo/fra/Lis-1/DopEcR/mAChR-A/Oatp74D/Tl/Nos/cmpy/smt3/lwr/ths/dlp/wit/Rheb/CG14184/eIF4A/br/tai/Src64B/AdipoR/Dad/tld/ftz-f1/DOR/hid/kek5/dally/ttv/sty/Mad/Smox/EcR/Hr38/Sik3/Sirt1/Trf2/Pdk1/poly/sfl/CycG/Crtc/Sesn/shn/cv-2/G9a/CG15537/mAChR-B/Dh44-R2/trio/sima/Akt1/gro/Smurf/bnl/rpr/mav/Sh/E(bx)/Roc1a/sxc/wrd/Dh44-R1/csw/Utx/foxo/lqf/Dop1R…	112		Male.marker.genes	GO:0005703	polytene chromosome puff	23/2364	49/11938	1.6225e-05	7.39624e-05	3.8466e-05	lawc/Su(var)205/vig2/Nipped-A/mam/Rm62/JIL-1/Hrb98DE/Parp/sqd/RpL11/Moe/scf/Su(Tpl)/Top1/Pep/cnc/CycT/spt4/pho/vig/Cdk12/REG	23
Male.marker.genes	GO:0004674	protein serine/threonine kinase activity	58/2323	198/12127	0.000344416	0.00198962	0.00134011	put/CkIIalpha/Tlk/CaMKI/CaMKII/aPKC/cdi/PKD/wit/msn/Pka-C1/alc/Eip63E/Lk6/Drak/nmo/Gprk1/JIL-1/Sik3/Dyrk2/Gprk2/Pdk1/Pkc53E/mnb/sff/Hipk/gish/grp/Atg1/Strn-Mlck/trio/Akt1/CG4629/PhKgamma/hep/CkIIbeta/Pak3/hppy/Pka-C3/Pkc98E/SRPK/Pitslre/wts/Asator/dco/CG31145/Srpk79D/ninaC/Sik2/bsk/Nak/Cdk12/tkv/CkIalpha/sqa/Mkk4/p38b/dop	58		Male.marker.genes	GO:0006897	endocytosis	91/2449	196/12275	3.40378e-17	8.77081e-16	4.3379e-16	fwe/pyd/Rab11/PIP4K/Nrx-1/faf/drpr/Chc/Dap160/Nlg4/Lis-1/mgl/Pxn/sdt/CaBP1/CG32683/Nlg2/norpA/numb/rudhira/cindr/Nlg3/Dscam1/EcR/Gprk2/brat/Galphaq/Pkc53E/Rac1/rhea/LpR1/mnb/ktub/spri/Cortactin/Moe/Vrp1/Src42A/Dab/Smurf/Tsp42Ej/RhoBTB/EndoB/Zir/hep/mim/CG41099/CASK/Rab14/BicD/Syt1/csw/stj/Nedd4/nsl1/lqf/comm/scrib/shi/Rab35/Arf102F/dco/Rab4/neur/AP-2sigma/Atg6/tim/aop/EndoA/Drp1/Eps-15/prtp/TM9SF…	91		Male.marker.genes	GO:0008076	voltage-gated potassium channel complex	9/2364	11/11938	1.72099e-05	7.77517e-05	4.04367e-05	Shawl/eag/Hk/Shaw/Shab/Shal/Sh/KCNQ/Elk	9
Male.marker.genes	GO:0045182	translation regulator activity	13/2323	26/12127	0.000382908	0.0021924	0.0014767	eIF4EHP/orb/bol/msi/orb2/brat/heph/pum/P32/Sxl/elav/Paip2/CNBP	13		Male.marker.genes	GO:0001754	eye photoreceptor cell differentiation	88/2449	187/12275	3.97335e-17	1.01479e-15	5.01897e-16	hth/mbl/tsr/hbs/klg/Lar/emc/noc/Rab11/elB/CSN5/CadN/Cam/tutl/pros/Ten-m/rin/EMC3/SP2353/CadN2/mask/Lis-1/ed/Nrk/cdi/stan/CSN4/klar/br/Mbs/S/crb/lola/lilli/Src64B/vimar/tinc/Socs36E/eys/rho/Rala/msi/Alk/phyl/sty/yrt/jeb/kay/dysc/Rac1/tau/spg/PDZ-GEF/Moe/Src42A/RhoGAP100F/nej/bun/Dab/dac/salm/Optix/fz/Rab6/Mob2/csw/RasGAP1/B-H1/B-H2/pAbp/scrib/wts/AP-1sigma/neur/oc/p47/aop/capt/sv/Liprin-alpha/ato/…	88		Male.marker.genes	GO:0044449	contractile fiber part	29/2364	69/11938	1.94078e-05	8.69058e-05	4.51975e-05	Tpi/Pgk/mbl/Pglym78/Gapdh1/Msp300/Hsp67Bc/Hsc70-4/zip/mask/Dg/robo3/Smn/CG14207/Lmpt/CG17839/DAAM/rhea/Tm1/CG43707/stv/sals/Scgdelta/up/CG1674/STUB1/kon/tn/RyR	29
Male.marker.genes	GO:0005088	Ras guanyl-nucleotide exchange factor activity	23/2323	60/12127	0.000415945	0.00234175	0.0015773	CG43658/Cdep/GEFmeso/Exn/mbc/Ziz/C3G/spg/CG42674/spri/PDZ-GEF/trio/sif/RhoGEF3/PsGEF/Zir/Trs31/Rgl/strat/pns/CG34393/CG9098/Bet5	23		Male.marker.genes	GO:0060322	head development	74/2449	145/12275	4.80708e-17	1.21695e-15	6.01883e-16	hth/tsh/Antp/tsr/toy/chinmo/cib/noc/Appl/Ten-a/Actbeta/pros/Nrg/shot/Invadolysin/Lis-1/drl/Dhc64C/Frl/Fas2/robo3/stan/disco/Prosap/Src64B/Ephrin/ftz-f1/D/rho/erm/Dscam1/Hr3/Smox/EcR/brat/jing/DAAM/vn/Apc/dati/robo2/vvl/trio/bun/eas/Dmtn/dac/chic/hb/ab/PsGEF/CkIIbeta/RhoGAPp190/Ptpmeg/cnc/Nipped-B/sim/ey/Hr51/exd/robl/oc/PrBP/shg/croc/apt/ato/bsk/en/kn/Dll/twf/bchs/tio	74		Male.marker.genes	GO:0044297	cell body	53/2364	158/11938	3.06313e-05	0.00013596	7.07093e-05	Tob/path/Imp/kcc/klg/RabX4/hig/Rab11/futsch/Ten-a/Rdl/fra/CG7166/RIC-3/Ten-m/Lis-1/robo1/ringer/Shawl/Pka-C1/Myo10A/bol/erm/rad/SK/Dscam1/shrb/orb2/brat/sNPF/NetB/Shaw/Trpgamma/ktub/Akt1/kra/slo/Rab6/Rab14/sn/Rab35/dco/Rab4/Cdk5alpha/CG13506/CG9784/Nak/Pdfr/ple/na/Ptp4E/Rab1/Rab7	53
Male.marker.genes	GO:0000900	translation repressor activity, mRNA regulatory element binding	8/2323	12/12127	0.00042347	0.00234175	0.0015773	orb/msi/orb2/heph/pum/Sxl/elav/Paip2	8		Male.marker.genes	GO:0048584	positive regulation of response to stimulus	172/2449	479/12275	7.85407e-17	1.97103e-15	9.74839e-16	DENR/Imp/14-3-3zeta/Mp/sun/14-3-3epsilon/hbs/CG43658/put/pyd/Akap200/TyrR/CkIIalpha/Mmp2/Snoo/Efa6/Actbeta/wls/fra/Cow/sli/Socs16D/Toll-7/tok/Lis-1/Tsp86D/ed/DopEcR/Tl/Ubr3/cmpy/Oct-TyrR/smt3/lwr/Diap1/Pp1-87B/Alg-2/dlp/stan/Rheb/CG14184/PDCD-5/asrij/msn/Pka-C1/Prosap/S/crb/puc/kug/Src64B/tld/Exn/flw/bib/rho/hid/erm/mbc/Dsp1/spen/dally/Alk/siz/Gprk1/ttv/jeb/Dyrk2/Gprk2/Parp/Pdk1/vn/Nplp1/Pde8/GIL…	172		Male.marker.genes	GO:0099568	cytoplasmic region	76/2364	250/11938	3.63779e-05	0.000160063	8.32446e-05	app/igl/Syp/Sep2/sqh/Sep4/Bsg/Ten-a/pros/zip/aPKC/CD98hc/Chc/Dap160/Rbp/Lis-1/ed/Dhc64C/Spn/sdt/eIF4E1/msn/Dys/Mbs/numb/Fife/cindr/Rim/nuf/toc/CG42684/brat/drongo/spir/pum/brp/Abl/spri/Cortactin/Moe/Vrp1/yki/Tm1/Akt1/chic/sano/Lrch/unc-13/corn/Ehbp1/Ran/dlg1/cv-c/Dl/scrib/wts/Rab35/Sep1/robl/strat/capt/Arpc2/cno/shg/Myo31DF/pnut/Rho1/baz/Arp3/capu/tmod/kibra/msk/alpha-Spec/Rab7/CG6891	76
Male.marker.genes	GO:0008121	ubiquinol-cytochrome-c reductase activity	8/2323	12/12127	0.00042347	0.00234175	0.0015773	UQCR-C2/UQCR-C1/UQCR-14/UQCR-Q/UQCR-6.4/RFeSP/ox/UQCR-11	8		Male.marker.genes	GO:0007163	establishment or maintenance of cell polarity	96/2449	215/12275	1.14703e-16	2.85338e-15	1.41123e-15	14-3-3zeta/tsr/14-3-3epsilon/hbs/Cont/Rab11/CadN/ctp/zip/aPKC/Chc/fred/rin/CadN2/Lis-1/Gbeta13F/Dg/Tomosyn/ed/Dhc64C/Frl/Nrx-IV/awd/sdt/veli/mago/stan/Pka-C1/Dys/alc/S/crb/lola/kug/orb/Rala/nmo/sty/yrt/kay/Parp/jvl/wake/Rac1/heph/poly/Pka-R1/sqd/Csk/Apc/sff/rdx/gish/sca/Moe/chb/caup/ara/nej/sano/fz/Rab6/Ran/CASK/dlg1/BicD/csw/sn/Khc-73/smog/cnc/cv-c/cora/Dl/scrib/dco/Pfdn2/mirr/aop/capt/CG45049/m…	96		Male.marker.genes	GO:0048471	perinuclear region of cytoplasm	29/2364	71/11938	3.69874e-05	0.000161341	8.39096e-05	mbl/Msp300/hdc/alphaTub84B/Rab11/sqh/Hsp83/Nhe3/svr/Chc/Gp93/klar/S/tapas/nuf/AGO1/orb2/NetB/alphaTub84D/chic/Plod/dlg1/Mapmodulin/neur/Cnx99A/Vha55/ben/Mlf/msk	29
Male.marker.genes	GO:0016681	oxidoreductase activity, acting on diphenols and related substances as donors, cytochrome as acceptor	8/2323	12/12127	0.00042347	0.00234175	0.0015773	UQCR-C2/UQCR-C1/UQCR-14/UQCR-Q/UQCR-6.4/RFeSP/ox/UQCR-11	8		Male.marker.genes	GO:0022603	regulation of anatomical structure morphogenesis	107/2449	251/12275	1.15677e-16	2.85338e-15	1.41123e-15	hth/Abd-B/tsh/Trim9/mspo/put/Lar/pyd/Akap200/Rab11/CadN/PlexA/tutl/pros/zip/fra/aPKC/shot/Lis-1/Gbeta13F/ed/Sema1a/Sar1/Arpc4/cdi/Diap1/stan/Rheb/nudC/hwt/msn/Mbs/norpA/kuz/Src64B/tinc/Dlic/Socs36E/hid/Rala/Dscam1/chn/sty/Mad/CG34401/Smox/Galphaq/DAAM/Rac1/NetB/spg/Apc/Abl/kirre/shn/PDZ-GEF/gish/G9a/Moe/Src42A/vvl/trio/Dab/bif/chic/sif/fz/Fis1/PlexB/RhoGAPp190/fwd/unc-104/sd/csw/Nedd4/RasGAP1/smo…	107		Male.marker.genes	GO:0030175	filopodium	9/2364	12/11938	5.66608e-05	0.000242552	0.000126145	Nrg/shot/Myo10A/ena/Vrp1/pico/kra/Rab35/shg	9
Male.marker.genes	GO:0000149	SNARE binding	19/2323	46/12127	0.000434075	0.00236284	0.0015915	gammaSnap1/cpx/nSyb/Tomosyn/Syx1A/Syx6/Syt12/Sytbeta/Syt4/Snap25/Rop/unc-13/Syx13/Syt1/Syt7/Snap24/alphaSnap/gammaSnap2/Syx7	19		Male.marker.genes	GO:0006812	cation transport	131/2449	333/12275	1.21559e-16	2.97303e-15	1.47041e-15	Cyt-c1/ATPsynF/ATPsynbeta/fwe/nrv3/blw/ATPsynCF6/Calx/sun/COX5B/Vha26/SPoCk/ATPsynB/Nckx30C/Ca-alpha1T/CG42594/Teh1/Atox1/nAChRalpha2/VhaAC45/nrv2/dpr3/Atpalpha/PMCA/Cam/Vha16-1/Teh2/Nhe3/Vha68-1/CG6329/Fer2LCH/CD98hc/VhaPPA1-1/Ca-alpha1D/CG15270/para/CG1090/Ndae1/Sec61alpha/nAChRalpha3/CG1688/SERCA/GluRIB/GluRIA/Shawl/Fer1HCH/CG42340/Ostgamma/CG31030/Scox/CG1840/Task7/mnd/w/Ih/nAChRalpha6/qvr/nA…	131		Male.marker.genes	GO:0034705	potassium channel complex	9/2364	12/11938	5.66608e-05	0.000242552	0.000126145	Shawl/eag/Hk/Shaw/Shab/Shal/Sh/KCNQ/Elk	9
Male.marker.genes	GO:0015085	calcium ion transmembrane transporter activity	21/2323	53/12127	0.000434588	0.00236284	0.0015915	fwe/Calx/SPoCk/Nckx30C/Ca-alpha1T/PMCA/CG4587/Ca-alpha1D/CG1090/SERCA/CG10470/cac/jp/Mid1/Trpgamma/MCU/rdgB/stj/Ca-beta/olf186-F/RyR	21		Male.marker.genes	GO:0019693	ribose phosphate metabolic process	112/2449	268/12275	1.278e-16	3.09941e-15	1.53292e-15	ND-SGDH/ND-42/CG7920/ND-ASHI/ND-B14.5B/ND-15/Tpi/Pgk/SdhB/scu/SdhC/Cyt-c1/ND-19/UQCR-C2/ND-B12/ND-PDSW/UQCR-C1/ATPsynbeta/COX5A/COX4/UQCR-14/CG14757/Cyt-c-p/PyK/sesB/Pglym78/Eno/Gapdh2/Gapdh1/blw/UQCR-Q/ATPsynCF6/cype/sun/COX5B/UQCR-6.4/ND-13A/ATPsynB/COX7C/Vha68-1/Dg/Gycalpha99B/awd/Pde6/COX7A/Scox/CG5065/Pde1c/Hex-A/Pde11/CG7834/Pde8/Ac78C/Pde9/Gycbeta100B/ATPsynG/levy/ATPsynC/RFeSP/ATPsyndelta…	112		Male.marker.genes	GO:0042734	presynaptic membrane	13/2364	22/11938	5.70428e-05	0.000242552	0.000126145	Nrx-1/Ten-a/wls/Dap160/Fas2/Syx1A/Fife/Exn/Ank2/brp/gukh/unc-13/dlg1	13
Male.marker.genes	GO:0000978	RNA polymerase II proximal promoter sequence-specific DNA binding	31/2323	91/12127	0.000535572	0.00288763	0.00194497	zfh2/bi/Hr4/scro/CG9932/Hr38/kay/NK7.1/Atf3/Trf2/NFAT/grn/Stat92E/CG32767/da/Utx/sim/CG12769/Ptx1/pho/HGTX/MESR3/CrebA/CG12071/Myc/Hr39/slou/CG18599/Usf/Dll/CG4360	31		Male.marker.genes	GO:0009150	purine ribonucleotide metabolic process	107/2449	252/12275	1.62416e-16	3.9061e-15	1.9319e-15	ND-SGDH/ND-42/CG7920/ND-ASHI/ND-B14.5B/ND-15/Tpi/Pgk/SdhB/scu/SdhC/Cyt-c1/ND-19/UQCR-C2/ND-B12/ND-PDSW/UQCR-C1/ATPsynbeta/COX5A/COX4/UQCR-14/CG14757/Cyt-c-p/PyK/sesB/Pglym78/Eno/Gapdh2/Gapdh1/blw/UQCR-Q/ATPsynCF6/cype/sun/COX5B/UQCR-6.4/ND-13A/ATPsynB/COX7C/Vha68-1/Dg/Gycalpha99B/awd/Pde6/COX7A/Scox/CG5065/Pde1c/Hex-A/Pde11/CG7834/Pde8/Ac78C/Pde9/Gycbeta100B/ATPsynG/levy/ATPsynC/RFeSP/ATPsyndelta…	107		Male.marker.genes	GO:0098562	cytoplasmic side of membrane	22/2364	49/11938	5.79899e-05	0.000244524	0.000127171	Ggamma30A/Spp/Gbeta13F/Galphao/Galphas/Src64B/Rgk3/sty/Gprk2/Galphaq/RpS26/Pli/gish/Src42A/trio/Rgk2/Rgk1/Stat92E/Rab35/baz/ave/kibra	22
Male.marker.genes	GO:0051020	GTPase binding	57/2323	197/12127	0.000541707	0.00289656	0.00195099	Gdi/CG43658/plx/Fs(2)Ket/Efa6/Cdep/GEFmeso/Tomosyn/Frl/Sec61beta/CG14184/eEF1delta/Fife/Exn/nuf/mbc/Evi5/siz/RhoGDI/Ziz/Tnpo/DAAM/Magi/Epac/C3G/CG32506/spg/CG42674/spri/PDZ-GEF/trio/sif/RhoGEF3/PsGEF/Zir/Trs31/BicD/Pak3/Rgl/btsz/strat/cno/Rph/Tctp/pns/GAPcenA/CG34393/CG5916/ric8a/CG9098/Rlip/msk/CG7324/Bet5/CG14812/hook/Sec16	57		Male.marker.genes	GO:0001505	regulation of neurotransmitter levels	71/2449	139/12275	1.95854e-16	4.67136e-15	2.31038e-15	gammaSnap1/Gad1/cpx/Ssadh/Gabat/Gdi/nemy/Rab3/sky/Hsc70-4/Frq2/CG1764/nSyb/Chc/olf413/Tomosyn/GABA-B-R2/unc-13-4A/Nrx-IV/Nos/veli/Tbh/w/Ih/Syx1A/Dys/inaE/cac/Syx6/Fife/Exn/Syt12/Rim/CanB2/Ace/Ddc/Sytbeta/NFAT/Syt4/CanB/brp/Cadps/Snap25/Rop/nej/Syn/ChAT/CG7430/Cirl/unc-13/Syx13/CASK/BicD/Syt1/CG7708/lqf/Syt7/Snap24/Arf102F/Frq1/Syngr/Rph/alphaSnap/twit/X11L/Fdh/gammaSnap2/Arf51F/Syx7/Synd/lqfR	71		Male.marker.genes	GO:0009898	cytoplasmic side of plasma membrane	20/2364	43/11938	6.76561e-05	0.000282926	0.000147142	Ggamma30A/Gbeta13F/Galphao/Galphas/Src64B/Rgk3/sty/Gprk2/Galphaq/Pli/gish/Src42A/trio/Rgk2/Rgk1/Stat92E/Rab35/baz/ave/kibra	20
Male.marker.genes	GO:0042562	hormone binding	9/2323	15/12127	0.000557301	0.00294106	0.00198097	DopEcR/EcR/nAChRalpha5/CG15537/Dh44-R2/Dh44-R1/InR/ImpL2/gce	9		Male.marker.genes	GO:0050807	regulation of synapse organization	76/2449	154/12275	2.07159e-16	4.90051e-15	2.42371e-15	nwk/Sod1/Syp/put/Rab11/CaMKII/Cals/Nrx-1/Sdc/futsch/Ten-a/drpr/Ten-m/DIP-gamma/Sar1/Galphao/dpr11/Fas2/Spn/Syn1/veli/stan/wit/Rheb/Octbeta2R/Nlg2/cac/Src64B/Dad/nmo/Mad/dysc/plum/brat/ena/Octbeta1R/Rac1/Ank2/pum/Liprin-gamma/mnb/Abl/Src42A/simj/Atg1/kis/trio/Akt1/Fak/ND-20/mav/slo/Mob2/CASK/dlg1/unc-104/Pak3/stj/Nedd4/metro/Cip4/SkpA/Top3beta/Aplip1/Mob4/Eps-15/Arp3/tkv/dbo/Syn2/Thor/bchs/Rab1/al…	76		Male.marker.genes	GO:0043025	neuronal cell body	49/2364	147/11938	7.1981e-05	0.000298544	0.000155265	path/Imp/kcc/klg/RabX4/hig/Rab11/futsch/Ten-a/Rdl/fra/CG7166/RIC-3/Ten-m/Lis-1/robo1/ringer/Shawl/Myo10A/bol/erm/rad/SK/Dscam1/shrb/brat/sNPF/NetB/Shaw/Trpgamma/ktub/Akt1/kra/slo/Rab6/Rab14/sn/Rab35/Rab4/Cdk5alpha/CG13506/CG9784/Nak/Pdfr/ple/na/Ptp4E/Rab1/Rab7	49
Male.marker.genes	GO:0005200	structural constituent of cytoskeleton	14/2323	30/12127	0.000563666	0.00294106	0.00198097	betaTub56D/alphaTub84B/Arpc5/Jupiter/Arpc4/Arpc3A/Arpc1/rhea/alphaTub84D/Strn-Mlck/gammaTub23C/Arpc2/Arp3/Lam	14		Male.marker.genes	GO:0008283	cell proliferation	138/2449	361/12275	3.05096e-16	7.15859e-15	3.54052e-15	DENR/hth/COX5A/COX4/UQCR-14/tsh/Wnt4/COX7C/ham/Nurf-38/Mmp2/noc/elB/CSN5/Hsp83/Actbeta/pros/zip/cnn/aPKC/eIF4G1/enc/Dap160/Pdcd4/eIF4G2/Lis-1/Gbeta13F/Rbp9/Dhc64C/Tl/Nos/fz2/eIF4E1/Fer1HCH/lwr/Smn/CG17059/DCTN3-p24/mats/cpo/SoxN/S/crb/pan/numb/Mkp3/rho/erm/HnRNP-K/AGO1/Smox/EcR/RpS21/brat/wake/vn/CG7834/Pkc53E/Rac1/Csk/Apc/Abl/shn/Ddr/CG1572/Moe/yki/Sod2/CG5214/bun/osa/eas/pxb/Akt1/mEFTu1/mtd/hb/…	138		Male.marker.genes	GO:0070160	tight junction	18/2364	37/11938	7.47755e-05	0.000307613	0.000159982	kune/Fas3/crim/Lac/nrv2/pck/Cont/Atpalpha/Nrg/Nrx-IV/sdt/yrt/dlg1/cora/scrib/CG45049/wun/vari	18
Male.marker.genes	GO:0016849	phosphorus-oxygen lyase activity	14/2323	30/12127	0.000563666	0.00294106	0.00198097	Gycalpha99B/Ac78C/Gycbeta100B/Ac3/CG31183/Gyc89Db/Ac13E/CG34357/rut/Ac76E/CG43373/CG10738/Gyc32E/Gyc88E	14		Male.marker.genes	GO:0009205	purine ribonucleoside triphosphate metabolic process	78/2449	161/12275	3.17475e-16	7.38898e-15	3.65447e-15	ND-SGDH/ND-42/ND-ASHI/ND-B14.5B/ND-15/Tpi/Pgk/SdhB/SdhC/Cyt-c1/ND-19/UQCR-C2/ND-B12/ND-PDSW/UQCR-C1/ATPsynbeta/COX5A/COX4/UQCR-14/CG14757/Cyt-c-p/PyK/sesB/Pglym78/Eno/Gapdh2/Gapdh1/blw/UQCR-Q/ATPsynCF6/cype/sun/COX5B/UQCR-6.4/ND-13A/ATPsynB/COX7C/Vha68-1/Dg/awd/COX7A/Scox/Hex-A/CG7834/ATPsynG/levy/ATPsynC/RFeSP/ATPsyndelta/ND-MLRQ/ATPsyngamma/ND-39/ATPsynD/ND-B15/ATPsynO/ND-B17.2/ND-B14/ND-23/Sdh…	78		Male.marker.genes	GO:0005681	spliceosomal complex	59/2364	187/11938	8.39844e-05	0.000342711	0.000178235	Imp/Syp/Hsc70-4/CG17454/Hel25E/SF2/tsu/Pabp2/rump/nonA/rin/B52/Rm62/SmE/mago/SmD3/x16/lost/CG2021/Sf3b6/U4-U6-60K/sqd/ytr/CG2931/Caper/Rbp1-like/CG10418/Bin1/CG1622/Sf3b5/Acn/CG42724/Pep/Dim1/hfp/pAbp/Ref1/SmB/SmD1/Prp31/CG9344/Prp3/cyp33/barc/Sf3b2/CG7971/Neos/SNRPG/SmF/Bx42/SmD2/REG/Rack1/LSm3/hoip/c12.1/Phf5a/CG11964/U2A	59
Male.marker.genes	GO:0022804	active transmembrane transporter activity	71/2323	258/12127	0.000606947	0.00314156	0.00211601	CG8860/Tom7/Dic1/ATPsynbeta/VGAT/sesB/nrv3/CG10804/blw/Calx/sun/kcc/Tom20/Vha26/SPoCk/ATPsynB/Nckx30C/VhaAC45/nrv2/Atpalpha/PMCA/Vha16-1/Nhe3/Vha68-1/VhaPPA1-1/CG43066/CG1090/Ndae1/Oatp74D/SERCA/Sec61beta/CG31030/w/CG10960/CG3164/GC1/ATPsynG/ATPsynC/ATPsyndelta/Mpcp2/ATPsyngamma/ATPsynD/ATPsynO/ATPsynE/Tim8/Atet/MCU/rdgB/Tom40/CG7708/prt/Vha13/Vha36-1/VhaM9.7-b/Vha14-1/mge/Vha44/CG1907/CG31229/Vh…	71		Male.marker.genes	GO:0098660	inorganic ion transmembrane transport	92/2449	205/12275	3.37927e-16	7.80207e-15	3.85878e-15	Cyt-c1/Dic1/ATPsynF/ATPsynbeta/fwe/nrv3/blw/ATPsynCF6/sun/COX5B/Vha26/SPoCk/ATPsynB/Nckx30C/Ca-alpha1T/CG42594/VhaAC45/nrv2/Atpalpha/PMCA/Vha16-1/Nhe3/Vha68-1/CG6329/Fer2LCH/VhaPPA1-1/Ca-alpha1D/para/CG1090/Ndae1/Sec61alpha/CG1688/SERCA/Shawl/Fer1HCH/CG42340/pHCl-1/Ostgamma/CG31030/Task7/GluClalpha/qvr/cac/eag/NaCP60E/Rgk3/SK/Mid1/Plc21C/Shaw/Trpgamma/ATPsynG/ATPsynC/Shab/ATPsyndelta/Mpcp2/ATPsyn…	92		Male.marker.genes	GO:0005768	endosome	65/2364	212/11938	9.8125e-05	0.00039721	0.000206579	path/CG32225/nwk/Rab3/hbs/Fas3/RabX4/Rab11/PIP4K/Vps24/wls/Nhe3/aph-1/Lamp1/ed/CG13784/Tl/fz2/CG15168/Snx3/wit/CG14184/asrij/S/arr/rho/nuf/Evi5/Klp98A/shrb/CG1275/Ykt6/CG34384/Chmp1/yki/fz/Rab26/Vps20/Trs31/Rab14/Khc-73/Dl/comm/Rab35/gol/Rab21/Rab4/neur/pen-2/Vha55/Vta1/shg/TM9SF4/CG30423/LTV1/Vsp37A/tkv/godzilla/CG14812/CG6707/Rab7/Arf51F/Syx7/hook/lqfR	65
Male.marker.genes	GO:0003727	single-stranded RNA binding	16/2323	37/12127	0.000664216	0.0034107	0.00229729	Rbp6/Pabp2/fne/shep/eIF4H1/CG4612/Hrb27C/ssx/Rpb7/Sxl/Pep/hfp/pAbp/elav/spt4/CNBP	16		Male.marker.genes	GO:0007613	memory	64/2449	120/12275	3.81994e-16	8.74948e-15	4.32735e-15	Tob/fabp/nemy/klg/mGluR/CaMKII/Appl/aPKC/svr/Nmdar2/2mit/Tomosyn/drl/CG4612/Fas2/5-HT1A/Tbh/CRMP/Adf1/w/CenG1A/dnc/Pka-C1/Dop2R/Src64B/arr/Socs36E/Rbfox1/rad/Ptp10D/EcR/orb2/Ddc/Phm/Rac1/Ank2/pum/brp/G9a/Dop1R1/kis/eas/pxb/Syn/Rgk1/kra/MCU/dikar/Mob2/CASK/Stat92E/Nipped-B/arm/rut/HDAC4/Pkc98E/scrib/shi/neur/mld/Nmdar1/bsk/Gld2/dome	64		Male.marker.genes	GO:0000315	organellar large ribosomal subunit	22/2364	51/11938	0.000120823	0.00048139	0.000250359	mRpL21/mRpL2/mRpL12/mRpL16/mRpL22/mRpL27/mRpL44/mRpL20/mRpL24/mRpL41/mRpL52/mRpL55/mRpL30/mRpL47/mRpL51/mRpL17/mRpL36/mRpL14/mRpL28/mRpL9/mRpL48/mRpL3	22
Male.marker.genes	GO:0003714	transcription corepressor activity	17/2323	41/12127	0.000815748	0.00412367	0.00277751	Tob/emc/CG5446/sbb/Gug/Smr/Sirt1/shn/gro/acj6/MBD-like/Bin1/NC2beta/CtBP/H/CG13293/CG13287	17		Male.marker.genes	GO:0060560	developmental growth involved in morphogenesis	59/2449	106/12275	3.93997e-16	8.95334e-15	4.42817e-15	path/hdc/Lar/Rab11/sqh/CadN/Nrg/shot/CadN2/Sema1a/Frl/fz2/stan/disco-r/Toll-6/dnc/Pka-C1/Mbs/pan/kuz/tai/arr/Dad/Dscam1/otk/kay/DAAM/Rac1/Ank2/otk2/Abl/spri/18w/RhoGAP100F/trio/bif/chic/fz/Sh/hep/Ptpmeg/arm/Hr51/rut/C15/raw/cno/shg/alphaSnap/Rho1/baz/Liprin-alpha/bsk/vari/vg/tkv/Vang/Sema2a/CG15019	59		Male.marker.genes	GO:0005762	mitochondrial large ribosomal subunit	22/2364	51/11938	0.000120823	0.00048139	0.000250359	mRpL21/mRpL2/mRpL12/mRpL16/mRpL22/mRpL27/mRpL44/mRpL20/mRpL24/mRpL41/mRpL52/mRpL55/mRpL30/mRpL47/mRpL51/mRpL17/mRpL36/mRpL14/mRpL28/mRpL9/mRpL48/mRpL3	22
Male.marker.genes	GO:0099094	ligand-gated cation channel activity	19/2323	48/12127	0.000815811	0.00412367	0.00277751	nAChRbeta2/nAChRalpha2/Nmdar2/nAChRalpha3/GluRIB/GluRIA/nAChRalpha6/nAChRalpha7/CG42260/jp/Cngl/nAChRalpha1/nAChRalpha5/Trpm/nAChRbeta1/CG11155/nAChRalpha4/Nmdar1/RyR	19		Male.marker.genes	GO:0007420	brain development	65/2449	123/12275	4.11375e-16	9.27521e-15	4.58737e-15	hth/tsr/toy/chinmo/cib/noc/Appl/Ten-a/Actbeta/pros/Nrg/shot/Invadolysin/Lis-1/drl/Dhc64C/Frl/Fas2/robo3/stan/disco/Prosap/Src64B/Ephrin/ftz-f1/D/rho/erm/Dscam1/Hr3/Smox/EcR/brat/DAAM/vn/Apc/dati/robo2/vvl/trio/bun/eas/Dmtn/dac/chic/ab/PsGEF/CkIIbeta/RhoGAPp190/Ptpmeg/Nipped-B/sim/ey/Hr51/exd/robl/oc/PrBP/shg/ato/bsk/en/Dll/twf/bchs	65		Male.marker.genes	GO:0005750	mitochondrial respiratory chain complex III	9/2364	13/11938	0.000151643	0.00059024	0.000306969	Cyt-c1/UQCR-C2/UQCR-C1/UQCR-14/UQCR-Q/UQCR-6.4/RFeSP/ox/UQCR-11	9
Male.marker.genes	GO:0060589	nucleoside-triphosphatase regulator activity	35/2323	109/12127	0.000842593	0.00422603	0.00284646	nrv3/Gdi/sky/RapGAP1/plx/nrv2/PlexA/Dhit/Tomosyn/CenG1A/norpA/vimar/CG42795/rad/Evi5/RhoGDI/drongo/CG32506/RhoGAP102A/RhoGAP100F/RhoGAP19D/RhoGAP71E/CG13551/RhoGAPp190/RhoGAP93B/cv-c/CG7394/Vta1/alphaSnap/Graf/GAPcenA/CG5916/ric8a/Rlip/CG7324	35		Male.marker.genes	GO:0030029	actin filament-based process	122/2449	306/12275	4.23804e-16	9.43466e-15	4.66623e-15	Btk29A/Msp300/nwk/tsr/CG32982/chinmo/bru1/CG43658/p120ctn/Akap200/cib/Rab11/sqh/Arpc5/SelR/Cam/Bsg/ctp/zip/shot/svr/mask/Gbeta13F/Dg/ed/sns/Galphao/Frl/Spn/Arpc4/cdi/Arpc3A/Smn/Arpc1/IRSp53/Pka-C1/crb/CG34347/puc/kug/Src64B/cindr/flw/CanB2/nuf/mbc/siz/yrt/Gprk2/ena/spir/jvl/DAAM/sick/Rac1/C3G/Pka-R1/rhea/Ret/CG32264/Abl/gukh/pod1/Cortactin/gish/Moe/Vrp1/Src42A/Tm1/mew/mthl1/trio/pico/RhoGAP71E/Ka…	122		Male.marker.genes	GO:0033180	proton-transporting V-type ATPase, V1 domain	9/2364	13/11938	0.000151643	0.00059024	0.000306969	Vha26/VhaAC45/Vha68-1/CG31030/Vha36-1/Vha14-1/Vha44/Vha55/VhaSFD	9
Male.marker.genes	GO:0004383	guanylate cyclase activity	8/2323	13/12127	0.000916022	0.0044899	0.00302419	Gycalpha99B/Gycbeta100B/CG31183/Gyc89Db/CG34357/CG10738/Gyc32E/Gyc88E	8		Male.marker.genes	GO:0042391	regulation of membrane potential	50/2449	82/12275	4.24985e-16	9.43466e-15	4.66623e-15	sesB/Ca-alpha1T/CG42594/nAChRbeta2/nAChRalpha2/shakB/Rdl/para/nAChRalpha3/CG1688/SERCA/CG42340/Smn/Task7/GluClalpha/Ih/nAChRalpha6/qvr/nAChRalpha7/Prosap/cac/eag/NaCP60E/Fife/SK/nAChRalpha1/Galphaq/VGlut/CG8726/nAChRalpha5/Moe/Shab/ATPsynD/Hsc70-5/SLO2/Sh/nAChRbeta1/slo/Rab6/Lcch3/Slob/Adar/CG43155/Task6/Elk/Piezo/nAChRalpha4/inaF-D/Nmdar1/Grd	50		Male.marker.genes	GO:0045275	respiratory chain complex III	9/2364	13/11938	0.000151643	0.00059024	0.000306969	Cyt-c1/UQCR-C2/UQCR-C1/UQCR-14/UQCR-Q/UQCR-6.4/RFeSP/ox/UQCR-11	9
Male.marker.genes	GO:0005544	calcium-dependent phospholipid binding	8/2323	13/12127	0.000916022	0.0044899	0.00302419	Syt12/AnxB11/Sytbeta/Syt4/PsGEF/Syt1/Syt7/Rph	8		Male.marker.genes	GO:0009126	purine nucleoside monophosphate metabolic process	81/2449	171/12275	4.46293e-16	9.75758e-15	4.82594e-15	ND-SGDH/ND-42/ND-ASHI/ND-B14.5B/ND-15/Tpi/Pgk/SdhB/SdhC/Cyt-c1/ND-19/UQCR-C2/ND-B12/ND-PDSW/UQCR-C1/ATPsynbeta/COX5A/COX4/UQCR-14/CG14757/Cyt-c-p/PyK/sesB/Pglym78/Eno/Gapdh2/Gapdh1/blw/UQCR-Q/ATPsynCF6/cype/sun/COX5B/UQCR-6.4/ND-13A/ATPsynB/COX7C/Vha68-1/Dg/COX7A/Scox/Hex-A/CG7834/ATPsynG/levy/ATPsynC/RFeSP/ATPsyndelta/ND-MLRQ/ATPsyngamma/ND-39/ATPsynD/ND-B15/ATPsynO/ND-B17.2/ND-B14/ND-23/SdhA/ND…	81		Male.marker.genes	GO:0005852	eukaryotic translation initiation factor 3 complex	10/2364	16/11938	0.000224591	0.000860933	0.00044775	eIF3m/eIF3g1/eIF3e/eIF3l/eIF3h/eIF3f1/eIF3d1/eIF3b/eIF3i/eIF3a	10
Male.marker.genes	GO:0019955	cytokine binding	8/2323	13/12127	0.000916022	0.0044899	0.00302419	Imp/put/Tl/cmpy/wit/cv-2/sog/tkv	8		Male.marker.genes	GO:0009167	purine ribonucleoside monophosphate metabolic process	81/2449	171/12275	4.46293e-16	9.75758e-15	4.82594e-15	ND-SGDH/ND-42/ND-ASHI/ND-B14.5B/ND-15/Tpi/Pgk/SdhB/SdhC/Cyt-c1/ND-19/UQCR-C2/ND-B12/ND-PDSW/UQCR-C1/ATPsynbeta/COX5A/COX4/UQCR-14/CG14757/Cyt-c-p/PyK/sesB/Pglym78/Eno/Gapdh2/Gapdh1/blw/UQCR-Q/ATPsynCF6/cype/sun/COX5B/UQCR-6.4/ND-13A/ATPsynB/COX7C/Vha68-1/Dg/COX7A/Scox/Hex-A/CG7834/ATPsynG/levy/ATPsynC/RFeSP/ATPsyndelta/ND-MLRQ/ATPsyngamma/ND-39/ATPsynD/ND-B15/ATPsynO/ND-B17.2/ND-B14/ND-23/SdhA/ND…	81		Male.marker.genes	GO:0045277	respiratory chain complex IV	10/2364	16/11938	0.000224591	0.000860933	0.00044775	COX5A/COX4/cype/COX5B/COX8/COX7C/COX7A/levy/ND-MLRQ/COX6B	10
Male.marker.genes	GO:0008320	protein transmembrane transporter activity	13/2323	28/12127	0.000940157	0.00453941	0.00305754	CG8860/Tom7/Tom20/Sec61alpha/Sec61beta/Tim23/Tim8/Tom40/mge/Tim17b/CG31229/Sec61gamma/Tom70	13		Male.marker.genes	GO:0009144	purine nucleoside triphosphate metabolic process	78/2449	162/12275	4.94463e-16	1.07295e-14	5.30663e-15	ND-SGDH/ND-42/ND-ASHI/ND-B14.5B/ND-15/Tpi/Pgk/SdhB/SdhC/Cyt-c1/ND-19/UQCR-C2/ND-B12/ND-PDSW/UQCR-C1/ATPsynbeta/COX5A/COX4/UQCR-14/CG14757/Cyt-c-p/PyK/sesB/Pglym78/Eno/Gapdh2/Gapdh1/blw/UQCR-Q/ATPsynCF6/cype/sun/COX5B/UQCR-6.4/ND-13A/ATPsynB/COX7C/Vha68-1/Dg/awd/COX7A/Scox/Hex-A/CG7834/ATPsynG/levy/ATPsynC/RFeSP/ATPsyndelta/ND-MLRQ/ATPsyngamma/ND-39/ATPsynD/ND-B15/ATPsynO/ND-B17.2/ND-B14/ND-23/Sdh…	78		Male.marker.genes	GO:0071013	catalytic step 2 spliceosome	42/2364	126/11938	0.000229005	0.000871253	0.000453117	Imp/Hsc70-4/SF2/tsu/Pabp2/nonA/rin/B52/Rm62/SmE/mago/SmD3/x16/lost/Sf3b6/U4-U6-60K/sqd/CG2931/Caper/CG10418/Bin1/Acn/CG42724/Pep/hfp/pAbp/Ref1/SmB/SmD1/cyp33/Sf3b2/CG7971/SNRPG/SmF/Bx42/SmD2/REG/Rack1/LSm3/c12.1/Phf5a/U2A	42
Male.marker.genes	GO:0022884	macromolecule transmembrane transporter activity	13/2323	28/12127	0.000940157	0.00453941	0.00305754	CG8860/Tom7/Tom20/Sec61alpha/Sec61beta/Tim23/Tim8/Tom40/mge/Tim17b/CG31229/Sec61gamma/Tom70	13		Male.marker.genes	GO:0009199	ribonucleoside triphosphate metabolic process	78/2449	163/12275	7.65755e-16	1.64923e-14	8.15683e-15	ND-SGDH/ND-42/ND-ASHI/ND-B14.5B/ND-15/Tpi/Pgk/SdhB/SdhC/Cyt-c1/ND-19/UQCR-C2/ND-B12/ND-PDSW/UQCR-C1/ATPsynbeta/COX5A/COX4/UQCR-14/CG14757/Cyt-c-p/PyK/sesB/Pglym78/Eno/Gapdh2/Gapdh1/blw/UQCR-Q/ATPsynCF6/cype/sun/COX5B/UQCR-6.4/ND-13A/ATPsynB/COX7C/Vha68-1/Dg/awd/COX7A/Scox/Hex-A/CG7834/ATPsynG/levy/ATPsynC/RFeSP/ATPsyndelta/ND-MLRQ/ATPsyngamma/ND-39/ATPsynD/ND-B15/ATPsynO/ND-B17.2/ND-B14/ND-23/Sdh…	78		Male.marker.genes	GO:0005924	cell-substrate adherens junction	18/2364	40/11938	0.000260832	0.000977638	0.000508445	Lar/shot/smal/kug/LRR/rhea/Abl/mew/Fak/Kank/wech/ckn/Swip-1/Pax/stck/cno/Liprin-alpha/kon	18
Male.marker.genes	GO:0051015	actin filament binding	21/2323	56/12127	0.00102155	0.00489585	0.00329762	Msp300/Akap200/Arpc5/zip/Spn/Arpc3A/Arpc1/rhea/pod1/Cortactin/Vrp1/Tm1/bif/sn/Svil/sals/Arpc2/Arp3/hts/twf/CG6891	21		Male.marker.genes	GO:0007447	imaginal disc pattern formation	61/2449	113/12275	8.83251e-16	1.88819e-14	9.3387e-15	gammaSnap1/hth/abd-A/Abd-B/tsh/Lim1/bi/ap/14-3-3epsilon/put/nmd/Nipped-A/Cow/drpr/Hs3st-B/sbb/dlp/disco/Pka-C1/crb/lilli/arr/Dad/rho/nuf/CG1943/CG5890/spen/nmo/dally/cic/Mad/tara/jing/vn/Apc/shn/Mpcp2/skd/osa/lgs/dac/mid/sno/Su(Tpl)/CG14073/H/B-H1/B-H2/Dl/Sulf1/cbt/capt/inv/en/vg/pnt/tkv/Axn/Dll/Rab7	61		Male.marker.genes	GO:0030055	cell-substrate junction	18/2364	40/11938	0.000260832	0.000977638	0.000508445	Lar/shot/smal/kug/LRR/rhea/Abl/mew/Fak/Kank/wech/ckn/Swip-1/Pax/stck/cno/Liprin-alpha/kon	18
Male.marker.genes	GO:0003707	steroid hormone receptor activity	9/2323	16/12127	0.00105779	0.00495933	0.00334038	Hr4/Eip78C/Eip75B/ftz-f1/Hr3/EcR/Hr38/Hr51/Hr39	9		Male.marker.genes	GO:0051254	positive regulation of RNA metabolic process	167/2449	472/12275	1.09889e-15	2.33191e-14	1.15332e-14	hth/abd-A/Abd-B/tsh/Antp/dsx/zfh2/Ssb-c31a/Lim1/bi/Bx/toy/Tet/ap/Eip75B/Su(var)205/CG40228/schlank/Rpt3/pros/Mtor/Tl/Eip93F/scro/Sox102F/mam/Adf1/disco/SoxN/tna/br/gpp/pan/lola/tai/lilli/tou/Rbfox1/ftz-f1/DOR/D/fs(1)h/REPTOR/Dsp1/Eip74EF/trx/Hr3/lolal/JIL-1/chn/Mad/EcR/Hr38/kay/NK7.1/Hrb27C/Trf2/tara/jing/Mitf/NFAT/TfIIA-S/pum/mnb/Ncoa6/Crtc/shn/atms/Xbp1/caup/ara/TfAP-2/tup/Mef2/yki/scf/vvl/ps/n…	167		Male.marker.genes	GO:0046540	U4/U6 x U5 tri-snRNP complex	11/2364	19/11938	0.000278802	0.00102973	0.000535539	SmE/CG2021/U4-U6-60K/CG10418/Dim1/SmB/Prp31/CG9344/Prp3/SmD2/LSm3	11
Male.marker.genes	GO:0008307	structural constituent of muscle	9/2323	16/12127	0.00105779	0.00495933	0.00334038	Scgbeta/Scgalpha/Dg/Syn1/Dys/Tina-1/Dyb/Syn2/Scgdelta	9		Male.marker.genes	GO:0030036	actin cytoskeleton organization	116/2449	289/12275	1.28108e-15	2.69867e-14	1.33472e-14	Btk29A/Msp300/nwk/tsr/CG32982/chinmo/bru1/CG43658/p120ctn/Akap200/cib/Rab11/sqh/Arpc5/SelR/Bsg/ctp/zip/shot/svr/mask/Gbeta13F/Dg/ed/sns/Galphao/Frl/Spn/Arpc4/cdi/Arpc3A/Smn/Arpc1/IRSp53/Pka-C1/crb/CG34347/puc/kug/Src64B/cindr/flw/CanB2/nuf/mbc/siz/yrt/ena/spir/jvl/DAAM/sick/Rac1/C3G/Pka-R1/rhea/Ret/CG32264/Abl/gukh/pod1/Cortactin/gish/Moe/Vrp1/Src42A/Tm1/mew/mthl1/trio/pico/Kank/chic/sif/fz/RhoBT…	116		Male.marker.genes	GO:0097526	spliceosomal tri-snRNP complex	11/2364	19/11938	0.000278802	0.00102973	0.000535539	SmE/CG2021/U4-U6-60K/CG10418/Dim1/SmB/Prp31/CG9344/Prp3/SmD2/LSm3	11
Male.marker.genes	GO:0016679	oxidoreductase activity, acting on diphenols and related substances as donors	9/2323	16/12127	0.00105779	0.00495933	0.00334038	UQCR-C2/UQCR-C1/UQCR-14/UQCR-Q/UQCR-6.4/RFeSP/ox/PPO2/UQCR-11	9		Male.marker.genes	GO:0048598	embryonic morphogenesis	106/2449	255/12275	1.32113e-15	2.76289e-14	1.36648e-14	Btk29A/Prosalpha6/abd-A/Ubx/tsh/chrb/ct/p120ctn/put/emc/pyd/Lac/Mmp2/Rab11/sqh/zip/aPKC/shot/sli/Gbeta13F/ed/Sec61alpha/Nrx-IV/sdt/mam/lwr/ths/Dtg/msn/Mbs/S/crb/pan/puc/Dad/Myo10A/tld/rho/hid/mbc/Mad/yrt/EcR/jeb/kay/Gprk2/ena/Rac1/sr/rhea/pum/sfl/Abl/shn/PDZ-GEF/Src42A/tup/5-HT2A/mthl1/Dab/RhoGAP71E/Smurf/drm/odd/tnc/chic/scyl/PhKgamma/hep/CG41099/dlg1/smog/arm/cv-c/cora/btsz/scrib/Rab35/gol/Cka/…	106		Male.marker.genes	GO:0045179	apical cortex	22/2364	54/11938	0.000326904	0.00119865	0.000623387	app/sqh/pros/zip/aPKC/Dap160/Spn/sdt/Mbs/cindr/nuf/CG42684/brat/Abl/sano/dlg1/Dl/wts/Arpc2/Rho1/baz/kibra	22
Male.marker.genes	GO:0046961	proton-transporting ATPase activity, rotational mechanism	15/2323	35/12127	0.00108899	0.00506892	0.00341419	ATPsynbeta/Vha26/VhaAC45/Vha16-1/Vha68-1/VhaPPA1-1/CG31030/Vha13/Vha36-1/VhaM9.7-b/Vha14-1/Vha44/Vha55/VhaSFD/VhaAC39-1	15		Male.marker.genes	GO:0009123	nucleoside monophosphate metabolic process	83/2449	180/12275	1.39356e-15	2.8934e-14	1.43103e-14	ND-SGDH/ND-42/ND-ASHI/ND-B14.5B/ND-15/Tpi/Pgk/SdhB/SdhC/Cyt-c1/ND-19/UQCR-C2/ND-B12/ND-PDSW/UQCR-C1/ATPsynbeta/COX5A/COX4/UQCR-14/CG14757/Cyt-c-p/PyK/sesB/Pglym78/Eno/Gapdh2/Gapdh1/blw/UQCR-Q/ATPsynCF6/cype/sun/COX5B/UQCR-6.4/ND-13A/ATPsynB/COX7C/Vha68-1/Dg/COX7A/Scox/Hex-A/CG7834/ATPsynG/levy/ATPsynC/RFeSP/ATPsyndelta/ND-MLRQ/ATPsyngamma/ND-39/ATPsynD/ND-B15/ATPsynO/ND-B17.2/ND-B14/ND-23/SdhA/ND…	83		Male.marker.genes	GO:0032154	cleavage furrow	16/2364	35/11938	0.000457633	0.00166592	0.000866401	Arl4/Rab11/sqh/zip/Tl/cindr/nuf/Moe/Lrch/Cip4/pnut/Amph/CG15602/Rab1/Arf51F/Synd	16
Male.marker.genes	GO:0000987	proximal promoter sequence-specific DNA binding	31/2323	95/12127	0.00121043	0.00559391	0.0037678	zfh2/bi/Hr4/scro/CG9932/Hr38/kay/NK7.1/Atf3/Trf2/NFAT/grn/Stat92E/CG32767/da/Utx/sim/CG12769/Ptx1/pho/HGTX/MESR3/CrebA/CG12071/Myc/Hr39/slou/CG18599/Usf/Dll/CG4360	31		Male.marker.genes	GO:0009161	ribonucleoside monophosphate metabolic process	82/2449	177/12275	1.4785e-15	3.04783e-14	1.50741e-14	ND-SGDH/ND-42/ND-ASHI/ND-B14.5B/ND-15/Tpi/Pgk/SdhB/SdhC/Cyt-c1/ND-19/UQCR-C2/ND-B12/ND-PDSW/UQCR-C1/ATPsynbeta/COX5A/COX4/UQCR-14/CG14757/Cyt-c-p/PyK/sesB/Pglym78/Eno/Gapdh2/Gapdh1/blw/UQCR-Q/ATPsynCF6/cype/sun/COX5B/UQCR-6.4/ND-13A/ATPsynB/COX7C/Vha68-1/Dg/COX7A/Scox/Hex-A/CG7834/ATPsynG/levy/ATPsynC/RFeSP/ATPsyndelta/ND-MLRQ/ATPsyngamma/ND-39/ATPsynD/ND-B15/ATPsynO/ND-B17.2/ND-B14/ND-23/SdhA/ND…	82		Male.marker.genes	GO:0022624	proteasome accessory complex	14/2364	29/11938	0.000520924	0.00186942	0.000972236	Rpn8/Rpn11/Rpn7/Rpt3/Rpn10/Sem1/Rpn6/Rpn9/Rpn12/Rpt6/Uch-L5/Rpn5/Rpt4/REG	14
Male.marker.genes	GO:0015036	disulfide oxidoreductase activity	16/2323	39/12127	0.00132129	0.00606296	0.00408373	Su(P)/Txl/CG5554/CaBP1/CG8993/CG7484/Scox/Trx-2/GILT1/GILT3/cl/GstO2/Grx1/GstO3/CG14407/ERp60	16		Male.marker.genes	GO:0009259	ribonucleotide metabolic process	107/2449	260/12275	2.21365e-15	4.53092e-14	2.24092e-14	ND-SGDH/ND-42/CG7920/ND-ASHI/ND-B14.5B/ND-15/Tpi/Pgk/SdhB/scu/SdhC/Cyt-c1/ND-19/UQCR-C2/ND-B12/ND-PDSW/UQCR-C1/ATPsynbeta/COX5A/COX4/UQCR-14/CG14757/Cyt-c-p/PyK/sesB/Pglym78/Eno/Gapdh2/Gapdh1/blw/UQCR-Q/ATPsynCF6/cype/sun/COX5B/UQCR-6.4/ND-13A/ATPsynB/COX7C/Vha68-1/Dg/Gycalpha99B/awd/Pde6/COX7A/Scox/CG5065/Pde1c/Hex-A/Pde11/CG7834/Pde8/Ac78C/Pde9/Gycbeta100B/ATPsynG/levy/ATPsynC/RFeSP/ATPsyndelta…	107		Male.marker.genes	GO:0031201	SNARE complex	14/2364	29/11938	0.000520924	0.00186942	0.000972236	gammaSnap1/cpx/nSyb/Tomosyn/Syx1A/Syx6/Ykt6/Snap25/Syx13/Snap24/alphaSnap/Sec22/gammaSnap2/Syx7	14
Male.marker.genes	GO:0005089	Rho guanyl-nucleotide exchange factor activity	13/2323	29/12127	0.00140795	0.00641509	0.00432091	CG43658/Cdep/GEFmeso/Exn/mbc/Ziz/spg/CG42674/trio/sif/RhoGEF3/PsGEF/Zir	13		Male.marker.genes	GO:0045935	positive regulation of nucleobase-containing compound metabolic process	173/2449	498/12275	2.36254e-15	4.80161e-14	2.3748e-14	Pgk/hth/abd-A/Abd-B/tsh/Antp/dsx/sesB/zfh2/Ssb-c31a/Lim1/bi/Bx/toy/Tet/ap/Eip75B/Su(var)205/CG40228/schlank/Rpt3/PlexA/pros/Mtor/Tl/Nos/Eip93F/scro/Sox102F/mam/Scox/Adf1/disco/SoxN/tna/br/gpp/pan/lola/tai/lilli/tou/Rbfox1/ftz-f1/DOR/D/fs(1)h/REPTOR/Dsp1/Eip74EF/trx/Hr3/lolal/JIL-1/chn/Mad/EcR/Hr38/kay/NK7.1/Hrb27C/Trf2/tara/jing/Mitf/NFAT/TfIIA-S/pum/mnb/Ncoa6/Crtc/shn/atms/Xbp1/caup/ara/TfAP-2/t…	173		Male.marker.genes	GO:0008541	proteasome regulatory particle, lid subcomplex	8/2364	12/11938	0.000537456	0.00191516	0.000996026	Rpn8/Rpn11/Rpn7/Sem1/Rpn6/Rpn9/Rpn12/Rpn5	8
Male.marker.genes	GO:0030695	GTPase regulator activity	29/2323	88/12127	0.00144427	0.00653457	0.00440139	Gdi/sky/RapGAP1/plx/PlexA/Dhit/Tomosyn/CenG1A/norpA/vimar/CG42795/rad/Evi5/RhoGDI/drongo/CG32506/RhoGAP102A/RhoGAP100F/RhoGAP19D/RhoGAP71E/RhoGAPp190/RhoGAP93B/cv-c/Graf/GAPcenA/CG5916/ric8a/Rlip/CG7324	29		Male.marker.genes	GO:0009141	nucleoside triphosphate metabolic process	79/2449	169/12275	2.6206e-15	5.28886e-14	2.61578e-14	ND-SGDH/ND-42/ND-ASHI/ND-B14.5B/ND-15/Tpi/Pgk/SdhB/SdhC/Cyt-c1/ND-19/UQCR-C2/ND-B12/ND-PDSW/UQCR-C1/ATPsynbeta/COX5A/COX4/UQCR-14/CG14757/Cyt-c-p/PyK/sesB/Pglym78/Eno/Gapdh2/Gapdh1/blw/UQCR-Q/ATPsynCF6/cype/sun/COX5B/UQCR-6.4/ND-13A/ATPsynB/COX7C/Vha68-1/Dg/awd/COX7A/Scox/Hex-A/CG7834/ATPsynG/levy/ATPsynC/RFeSP/ATPsyndelta/ND-MLRQ/ATPsyngamma/ND-39/ATPsynD/ND-B15/ATPsynO/ND-B17.2/ND-B14/ND-23/Sdh…	79		Male.marker.genes	GO:0016324	apical plasma membrane	26/2364	71/11938	0.000711083	0.00251614	0.00130858	sosie/hbs/sqh/aPKC/Ca-alpha1D/mgl/Pde6/sdt/cac/crb/dally/kek1/Syt4/rst/Moe/mew/Stat92E/arm/btsz/Rab35/ZnT63C/Rho1/baz/kibra/Ptp4E/dome	26
Male.marker.genes	GO:0019003	GDP binding	7/2323	11/12127	0.00149703	0.00672624	0.00453048	Rheb/CG8500/Rala/CG30158/CG13375/Ric/Ras64B	7		Male.marker.genes	GO:0006753	nucleoside phosphate metabolic process	124/2449	320/12275	3.13014e-15	6.27333e-14	3.10269e-14	ND-SGDH/Dak1/ND-42/CG7920/ND-ASHI/ND-B14.5B/ND-15/Tpi/Pgk/SdhB/scu/SdhC/Cyt-c1/ND-19/UQCR-C2/ND-B12/ND-PDSW/UQCR-C1/ATPsynbeta/COX5A/COX4/UQCR-14/CG14757/Cyt-c-p/PyK/sesB/Pglym78/CG6330/Eno/Gapdh2/Gapdh1/blw/Mdh1/UQCR-Q/ATPsynCF6/cype/sun/COX5B/UQCR-6.4/ND-13A/ATPsynB/COX7C/PlexA/Vha68-1/Dg/Gycalpha99B/Nos/awd/Pde6/COX7A/Scox/CG5065/Pde1c/Hex-A/Pde11/CG7834/Pde8/Ac78C/Pde9/Gycbeta100B/ATPsynG/lev…	124		Male.marker.genes	GO:0005751	mitochondrial respiratory chain complex IV	9/2364	15/11938	0.000720924	0.00252985	0.00131571	COX5A/COX4/cype/COX5B/COX7C/COX7A/levy/ND-MLRQ/COX6B	9
Male.marker.genes	GO:0008081	phosphoric diester hydrolase activity	14/2323	33/12127	0.00178487	0.0079642	0.00536432	CG14883/CG32052/Pde6/dnc/norpA/Pde1c/Pde11/Pde8/Pka-R1/Pde9/Plc21C/Pka-R2/PrBP/CG9394	14		Male.marker.genes	GO:0009117	nucleotide metabolic process	123/2449	317/12275	3.61614e-15	7.19737e-14	3.5597e-14	ND-SGDH/Dak1/ND-42/CG7920/ND-ASHI/ND-B14.5B/ND-15/Tpi/Pgk/SdhB/scu/SdhC/Cyt-c1/ND-19/UQCR-C2/ND-B12/ND-PDSW/UQCR-C1/ATPsynbeta/COX5A/COX4/UQCR-14/CG14757/Cyt-c-p/PyK/sesB/Pglym78/CG6330/Eno/Gapdh2/Gapdh1/blw/Mdh1/UQCR-Q/ATPsynCF6/cype/sun/COX5B/UQCR-6.4/ND-13A/ATPsynB/COX7C/PlexA/Vha68-1/Dg/Gycalpha99B/Nos/awd/Pde6/COX7A/Scox/CG5065/Pde1c/Hex-A/Pde11/CG7834/Pde8/Ac78C/Pde9/Gycbeta100B/ATPsynG/lev…	123		Male.marker.genes	GO:0005783	endoplasmic reticulum	122/2364	473/11938	0.000724956	0.00252985	0.00131571	Dad1/CG8397/Torsin/Scp2/SPoCk/app/schlank/CG31460/Calr/Rtnl1/wls/CG15814/Spp/Hsc70-3/CG11999/bai/CNPYb/l(1)G0320/SsRbeta/eca/PIG-F/p24-1/aph-1/CHOp24/KdelR/CG13887/rho-5/CG8668/EMC3/ste24a/EMC1/CG31650/CG5027/Sar1/Sec61alpha/PH4alphaEFB/twr/SERCA/Spase22-23/CG32441/CG17270/Sec61beta/Tapdelta/boca/Spase25/CG33977/CaBP1/Ostgamma/CG15168/CG33129/CG7484/CG10470/CG5885/CG9662/Manf/Gp93/CG1840/PIG-K/St…	122
Male.marker.genes	GO:0072341	modified amino acid binding	9/2323	17/12127	0.0018675	0.00827586	0.00557424	drpr/Syt12/Sytbeta/Syt4/ND-ACP/GstO2/Syt1/Syt7/FASN1	9		Male.marker.genes	GO:0048870	cell motility	140/2449	378/12275	3.85628e-15	7.62276e-14	3.77009e-14	abd-A/Abd-B/Wnt4/Msp300/tsr/sosie/14-3-3epsilon/trn/Pvf3/Lar/caps/Mmp2/Rab11/sqh/Arpc5/CSN5/Sdc/PlexA/faf/zip/fra/sli/Invadolysin/Lis-1/Gbeta13F/Sema1a/robo1/Dhc64C/stai/fz2/awd/qm/veli/lwr/Ostgamma/ths/Diap1/dlp/kuz/puc/numb/kug/tai/Dad/Socs36E/cindr/Rala/mbc/dally/trx/Dscam1/Evi5/ttv/EcR/jeb/kay/orb2/Hrb27C/ena/jing/vn/Rac1/sr/rhea/NetB/pum/sfl/sqd/Csk/Apc/Abl/spri/PDZ-GEF/Cortactin/gish/18w/ch…	140		Male.marker.genes	GO:0015629	actin cytoskeleton	39/2364	121/11938	0.00079612	0.00275916	0.00143497	Msp300/tsr/Act42A/sqh/Arpc5/Cam/zip/Lis-1/Spn/pigs/Arpc4/Arpc3A/Arpc1/DCTN3-p24/IRSp53/Myo10A/Myo81F/DAAM/pod1/Cortactin/Moe/Vrp1/Act5C/Tm1/DCTN6-p27/sn/capt/sals/Arpc2/Mlc-c/Myo31DF/ninaC/Arp3/capu/hts/up/CG1674/twf/CG6891	39
Male.marker.genes	GO:0008565	protein transporter activity	13/2323	30/12127	0.00205358	0.00903853	0.00608794	CG8860/Tom7/Tom20/Sec61alpha/Sec61beta/Tim23/Tim8/Tom40/mge/Tim17b/CG31229/Sec61gamma/Tom70	13		Male.marker.genes	GO:0045893	positive regulation of transcription, DNA-templated	160/2449	453/12275	5.37577e-15	1.04124e-13	5.14981e-14	hth/abd-A/Abd-B/tsh/Antp/dsx/zfh2/Ssb-c31a/Lim1/bi/Bx/toy/Tet/ap/Eip75B/Su(var)205/CG40228/schlank/Rpt3/pros/Mtor/Tl/Eip93F/scro/Sox102F/mam/Adf1/disco/SoxN/tna/br/gpp/pan/lola/tai/lilli/tou/Rbfox1/ftz-f1/DOR/D/fs(1)h/REPTOR/Dsp1/Eip74EF/trx/Hr3/lolal/JIL-1/chn/Mad/EcR/Hr38/kay/NK7.1/Trf2/tara/jing/Mitf/NFAT/TfIIA-S/mnb/Ncoa6/Crtc/shn/atms/Xbp1/caup/ara/TfAP-2/tup/Mef2/yki/scf/vvl/nej/sima/osa/on…	160		Male.marker.genes	GO:0005844	polysome	10/2364	18/11938	0.000830861	0.00284064	0.00147735	Rbp6/eIF4H1/RpS23/RpS26/RpS29/CG11835/bic/eIF3h/CG5515/mgr	10
Male.marker.genes	GO:0030674	protein binding, bridging	15/2323	37/12127	0.00213711	0.00934262	0.00629276	CG17270/CG3104/phyl/pod1/BicD/wech/csw/sn/AP-1sigma/mbf1/AP-2sigma/cal1/Afti/AP-2mu/dock	15		Male.marker.genes	GO:1902680	positive regulation of RNA biosynthetic process	160/2449	453/12275	5.37577e-15	1.04124e-13	5.14981e-14	hth/abd-A/Abd-B/tsh/Antp/dsx/zfh2/Ssb-c31a/Lim1/bi/Bx/toy/Tet/ap/Eip75B/Su(var)205/CG40228/schlank/Rpt3/pros/Mtor/Tl/Eip93F/scro/Sox102F/mam/Adf1/disco/SoxN/tna/br/gpp/pan/lola/tai/lilli/tou/Rbfox1/ftz-f1/DOR/D/fs(1)h/REPTOR/Dsp1/Eip74EF/trx/Hr3/lolal/JIL-1/chn/Mad/EcR/Hr38/kay/NK7.1/Trf2/tara/jing/Mitf/NFAT/TfIIA-S/mnb/Ncoa6/Crtc/shn/atms/Xbp1/caup/ara/TfAP-2/tup/Mef2/yki/scf/vvl/nej/sima/osa/on…	160		Male.marker.genes	GO:0098595	perivitelline space	10/2364	18/11938	0.000830861	0.00284064	0.00147735	Sdc/fra/CtsB1/CG12163/dlp/kuz/Meltrin/dally/sdk/CG32066	10
Male.marker.genes	GO:0004298	threonine-type endopeptidase activity	12/2323	27/12127	0.00233963	0.0100916	0.00679724	Prosalpha6/Prosbeta1/Prosbeta3/Prosbeta2/Prosalpha7/Prosbeta4/Prosbeta5/Prosbeta6/Prosalpha2/Prosalpha5/Prosalpha3/Prosalpha4	12		Male.marker.genes	GO:1903508	positive regulation of nucleic acid-templated transcription	160/2449	453/12275	5.37577e-15	1.04124e-13	5.14981e-14	hth/abd-A/Abd-B/tsh/Antp/dsx/zfh2/Ssb-c31a/Lim1/bi/Bx/toy/Tet/ap/Eip75B/Su(var)205/CG40228/schlank/Rpt3/pros/Mtor/Tl/Eip93F/scro/Sox102F/mam/Adf1/disco/SoxN/tna/br/gpp/pan/lola/tai/lilli/tou/Rbfox1/ftz-f1/DOR/D/fs(1)h/REPTOR/Dsp1/Eip74EF/trx/Hr3/lolal/JIL-1/chn/Mad/EcR/Hr38/kay/NK7.1/Trf2/tara/jing/Mitf/NFAT/TfIIA-S/mnb/Ncoa6/Crtc/shn/atms/Xbp1/caup/ara/TfAP-2/tup/Mef2/yki/scf/vvl/nej/sima/osa/on…	160		Male.marker.genes	GO:0019897	extrinsic component of plasma membrane	17/2364	40/11938	0.000863188	0.00293136	0.00152453	Ggamma30A/klg/CadN2/Gbeta13F/Galphao/Galphas/norpA/Src64B/mbc/Galphaq/Rac1/Abl/Src42A/trio/arm/shg/ninaC	17
Male.marker.genes	GO:0070003	threonine-type peptidase activity	12/2323	27/12127	0.00233963	0.0100916	0.00679724	Prosalpha6/Prosbeta1/Prosbeta3/Prosbeta2/Prosalpha7/Prosbeta4/Prosbeta5/Prosbeta6/Prosalpha2/Prosalpha5/Prosalpha3/Prosalpha4	12		Male.marker.genes	GO:0051124	synaptic growth at neuromuscular junction	67/2449	134/12275	5.48535e-15	1.05538e-13	5.21974e-14	Imp/sesB/cpx/nwk/Syp/Lar/Atpalpha/CaMKII/Nrx-1/Sdc/futsch/Ten-a/Ten-m/Galphao/Fas2/stai/Syn1/veli/wit/Rheb/Octbeta2R/Nlg2/Prosap/cac/Src64B/Dad/nmo/Mad/jeb/kay/dysc/plum/brat/ena/Pdk1/Octbeta1R/Ank2/pum/Liprin-gamma/mnb/Abl/Src42A/simj/Atg1/kis/trio/Akt1/Fak/Syn/slo/Mob2/CASK/dlg1/unc-104/stj/metro/Cip4/SkpA/Mob4/Eps-15/ben/Liprin-alpha/Arp3/tkv/dbo/Syn2/Synd	67		Male.marker.genes	GO:0005913	cell-cell adherens junction	12/2364	24/11938	0.000879839	0.00296799	0.00154358	hbs/p120ctn/pyd/CadN2/ed/yrt/rst/arm/scrib/cno/shg/baz	12
Male.marker.genes	GO:0016772	transferase activity, transferring phosphorus-containing groups	113/2323	462/12127	0.0024103	0.0103276	0.00695618	Dak1/Btk29A/Pgk/PyK/rdgA/Argk/put/bma/CkIIalpha/Tlk/PIP4K/CaMKI/CaMKII/aPKC/Pis/Nrk/CG4546/awd/sdt/cdi/Rpb11/PKD/wit/msn/Pka-C1/alc/Eip63E/Src64B/Dgk/CG2201/Lk6/Drak/nmo/Alk/Gprk1/JIL-1/otk/Gk2/Sik3/Hex-A/Dyrk2/Gprk2/Pdk1/CG31140/Pkc53E/Ret/CG34384/mnb/CycG/Csk/sff/Abl/Ddr/Hipk/gish/Src42A/grp/Atg1/Strn-Mlck/trio/eas/Akt1/Fak/CG4629/PhKgamma/CG10082/CG6767/hep/CkIIbeta/Rpb7/CASK/dlg1/Slob/fwd/Pak…	113		Male.marker.genes	GO:0051674	localization of cell	141/2449	384/12275	6.90958e-15	1.3206e-13	6.53147e-14	abd-A/Abd-B/Wnt4/Msp300/tsr/sosie/14-3-3epsilon/trn/Pvf3/Lar/caps/Mmp2/Rab11/sqh/Arpc5/CSN5/Sdc/PlexA/faf/zip/fra/sli/Invadolysin/Lis-1/Gbeta13F/Sema1a/robo1/Dhc64C/stai/fz2/awd/qm/veli/lwr/Ostgamma/ths/Diap1/dlp/kuz/puc/numb/kug/tai/Dad/Socs36E/cindr/Rala/mbc/dally/trx/Dscam1/Evi5/ttv/EcR/jeb/kay/orb2/Hrb27C/ena/jing/jvl/vn/Rac1/sr/rhea/NetB/pum/sfl/sqd/Csk/Apc/Abl/spri/PDZ-GEF/Cortactin/gish/18…	141		Male.marker.genes	GO:0005667	transcription factor complex	52/2364	175/11938	0.0010417	0.00348106	0.00181041	hth/abd-A/Ubx/Ssb-c31a/Hr4/Eip75B/MED7/mam/Smn/jigr1/Taf11/SoxN/CG16779/pan/Dad/ftz-f1/Sox21b/D/CG4404/Mad/Smox/EcR/Hr38/kay/Trf2/NFAT/TfIIA-S/Taf12/skd/sima/MED26/gro/ear/Taf4/lgs/dac/Optix/Bgb/sd/da/bip2/sim/arm/Max/Ptx1/exd/Taf10b/pho/Hr39/gce/MED4/E2f1	52
Male.marker.genes	GO:0019843	rRNA binding	16/2323	41/12127	0.00245543	0.0104517	0.0070398	mRpS7/mRpL16/RpS9/RpL23/RpL12/RpLP0/RpL5/mRpL20/mRpS6/RpL9/mRpS11/RpS14a/Non3/CG4866/mRpS18A/RpS13	16		Male.marker.genes	GO:0072521	purine-containing compound metabolic process	114/2449	288/12275	7.31148e-15	1.38822e-13	6.8659e-14	ND-SGDH/ND-42/CG7920/ND-ASHI/ND-B14.5B/ND-15/Tpi/Pgk/SdhB/scu/SdhC/Cyt-c1/ND-19/UQCR-C2/ND-B12/ND-PDSW/UQCR-C1/ATPsynbeta/COX5A/COX4/UQCR-14/CG14757/Cyt-c-p/PyK/sesB/Pglym78/Eno/Gapdh2/Gapdh1/blw/UQCR-Q/ATPsynCF6/cype/sun/COX5B/UQCR-6.4/ND-13A/ATPsynB/COX7C/PlexA/Vha68-1/Dg/Gycalpha99B/Nos/awd/Pde6/COX7A/Scox/CG5065/Pde1c/Hex-A/Pde11/CG7834/Pde8/Ac78C/Pde9/Gycbeta100B/ATPsynG/levy/ATPsynC/RFeSP/A…	114		Male.marker.genes	GO:0098687	chromosomal region	59/2364	204/11938	0.00104569	0.00348106	0.00181041	lawc/abd-A/Ubx/Abd-B/Nnf1a/Su(var)205/vig2/Mis12/BuGZ/Hsp83/Nipped-A/Lis-1/Dhc64C/smt3/mam/lwr/Rm62/BEAF-32/Adf1/HP1c/Gug/trx/JIL-1/Hrb98DE/Psc/Parp/Nlp/sqd/RpL11/CLIP-190/G9a/Moe/chb/scf/His2Av/MED26/CG8677/Su(Tpl)/Top1/HP4/Bub3/mod(mdg4)/Pep/Utx/nsl1/cnc/Ubi-p5E/CycT/spt4/cal1/pho/Irbp/CG11788/vig/Mlf/PPP4R2r/Cdk12/REG/Su(var)2-HP2	59
Male.marker.genes	GO:0016667	oxidoreductase activity, acting on a sulfur group of donors	19/2323	52/12127	0.00247582	0.0104696	0.00705186	Su(P)/Txl/SelR/CG5554/CG5027/CaBP1/CG8993/CG7484/Scox/Trx-2/GILT1/GILT3/CG7430/cl/GstO2/Grx1/GstO3/CG14407/ERp60	19		Male.marker.genes	GO:0099504	synaptic vesicle cycle	61/2449	117/12275	7.58431e-15	1.43061e-13	7.07556e-14	gammaSnap1/VGAT/fwe/cpx/Rab3/sky/Rab11/Nrx-1/nSyb/Chc/Dap160/Nlg4/Tomosyn/GABA-B-R2/unc-13-4A/Nrx-IV/w/Syx1A/Nlg2/Syx6/Fife/Rim/Nlg3/brat/Sytbeta/VGlut/NFAT/Syt4/mnb/Cadps/Snap25/Rop/Dab/Syn/unc-13/Syx13/CASK/Blos1/BicD/Syt1/stj/lqf/Syt7/prt/shi/Snap24/Arf102F/EndoA/Syngr/Drp1/Eps-15/Rph/alphaSnap/X11L/Pldn/twf/gammaSnap2/Arf51F/Syx7/Synd/lqfR	61		Male.marker.genes	GO:0016323	basolateral plasma membrane	20/2364	51/11938	0.00107037	0.00353993	0.00184103	Fas3/Lar/pyd/Nrt/Atpalpha/Ca-alpha1D/Dg/veli/cac/kug/dally/yrt/mew/dlg1/cv-c/scrib/Lkr/ZnT63C/ogre/alpha-Spec	20
Male.marker.genes	GO:0005096	GTPase activator activity	27/2323	83/12127	0.00255488	0.0107338	0.00722981	sky/RapGAP1/plx/PlexA/Dhit/Tomosyn/CenG1A/norpA/vimar/CG42795/rad/Evi5/drongo/CG32506/RhoGAP102A/RhoGAP100F/RhoGAP19D/RhoGAP71E/RhoGAPp190/RhoGAP93B/cv-c/Graf/GAPcenA/CG5916/ric8a/Rlip/CG7324	27		Male.marker.genes	GO:0007269	neurotransmitter secretion	56/2449	103/12275	8.85632e-15	1.64899e-13	8.15563e-14	gammaSnap1/cpx/Gdi/nemy/Rab3/sky/Hsc70-4/Frq2/nSyb/Chc/Tomosyn/GABA-B-R2/unc-13-4A/Nrx-IV/veli/Ih/Syx1A/Dys/cac/Syx6/Fife/Exn/Syt12/Rim/CanB2/Sytbeta/NFAT/Syt4/CanB/brp/Cadps/Snap25/Rop/nej/Syn/Cirl/unc-13/Syx13/CASK/BicD/Syt1/lqf/Syt7/Snap24/Arf102F/Frq1/Syngr/Rph/alphaSnap/twit/X11L/gammaSnap2/Arf51F/Syx7/Synd/lqfR	56		Male.marker.genes	GO:0034704	calcium channel complex	8/2364	13/11938	0.00115476	0.0037942	0.00197327	Ca-alpha1T/CG4587/Ca-alpha1D/cac/EMRE/MCU/Ca-beta/RyR	8
Male.marker.genes	GO:0019199	transmembrane receptor protein kinase activity	11/2323	24/12127	0.00262964	0.0109766	0.00739336	put/Nrk/wit/Alk/otk/Ret/Ddr/InR/CG3277/Pvr/tkv	11		Male.marker.genes	GO:0099643	signal release from synapse	56/2449	103/12275	8.85632e-15	1.64899e-13	8.15563e-14	gammaSnap1/cpx/Gdi/nemy/Rab3/sky/Hsc70-4/Frq2/nSyb/Chc/Tomosyn/GABA-B-R2/unc-13-4A/Nrx-IV/veli/Ih/Syx1A/Dys/cac/Syx6/Fife/Exn/Syt12/Rim/CanB2/Sytbeta/NFAT/Syt4/CanB/brp/Cadps/Snap25/Rop/nej/Syn/Cirl/unc-13/Syx13/CASK/BicD/Syt1/lqf/Syt7/Snap24/Arf102F/Frq1/Syngr/Rph/alphaSnap/twit/X11L/gammaSnap2/Arf51F/Syx7/Synd/lqfR	56		Male.marker.genes	GO:0030139	endocytic vesicle	14/2364	31/11938	0.00119556	0.00390293	0.00202982	Chc/nuf/spri/VAChT/Rab14/BicD/lqf/arm/Dl/comm/AP-2sigma/AP-2mu/apolpp/Rab7	14
Male.marker.genes	GO:0022824	transmitter-gated ion channel activity	17/2323	45/12127	0.00273544	0.0113451	0.00764152	nAChRbeta2/nAChRalpha2/Rdl/Nmdar2/nAChRalpha3/GluRIB/GluRIA/nAChRalpha6/nAChRalpha7/nAChRalpha1/nAChRalpha5/nAChRbeta1/Lcch3/CG11155/nAChRalpha4/Nmdar1/Grd	17		Male.marker.genes	GO:0022900	electron transport chain	53/2449	95/12275	1.09547e-14	2.02662e-13	1.00233e-13	ND-SGDH/ND-42/ND-ASHI/ND-B14.5B/ND-15/SdhB/SdhC/Cyt-c1/ND-19/UQCR-C2/ND-B12/ND-PDSW/UQCR-C1/COX5A/COX4/UQCR-14/CG14757/blw/UQCR-Q/cype/COX5B/UQCR-6.4/ND-13A/COX7C/Invadolysin/COX7A/GC1/levy/RFeSP/ND-MLRQ/ND-39/ND-B15/ND-B17.2/ND-18/ND-B14/ND-23/SdhA/ND-75/ND-B18/ND-51/ox/ND-24/ND-ACP/ND-20/ND-B16.6/SdhD/ND-13B/ND-49/ND-B22/ND-B14.5A/dj-1beta/NP15.6/UQCR-11	53		Male.marker.genes	GO:0042175	nuclear outer membrane-endoplasmic reticulum membrane network	63/2364	222/11938	0.00122332	0.00396796	0.00206364	Dad1/CG8397/Msp300/CG31460/Calr/wls/CG15814/Spp/CG11999/l(1)G0320/PIG-F/CG13887/rho-5/EMC3/ste24a/EMC1/CG5027/Sec61alpha/twr/SERCA/Spase22-23/CG32441/CG17270/Sec61beta/Spase25/CG33977/Ostgamma/CG15168/CG10470/CG9662/CG1840/PIG-K/Stt3B/CG11137/klar/S/jp/RpS26/Spase12/Xbp1/jagn/bif/CG1371/Ost48/CG3678/EMC8-9/cni/Cnx99A/OstDelta/Alg10/Desat1/CG7990/SCAP/PIG-H/ergic53/ORMDL/xit/Sec22/CG33116/CG17556/…	63
Male.marker.genes	GO:0004129	cytochrome-c oxidase activity	10/2323	21/12127	0.00289895	0.0115069	0.00775049	COX5A/COX4/cype/COX5B/COX8/COX7C/COX7A/levy/ND-MLRQ/COX6B	10		Male.marker.genes	GO:0021700	developmental maturation	98/2449	235/12275	1.2456e-14	2.28968e-13	1.13244e-13	Torsin/Imp/14-3-3zeta/hdc/Syp/14-3-3epsilon/CkIIalpha/Cont/Rab11/tsu/CSN5/rump/ctp/Hsp83/Nrg/shep/bai/aPKC/drpr/Chc/Ca-alpha1D/enc/Lis-1/Dg/Dhc64C/mgl/Fas2/Nrx-IV/mago/SmD3/lost/Syx1A/klar/Pka-C1/Nlg2/cac/tld/ftz-f1/flw/Rim/orb/tud/cic/shrb/EcR/Hr38/plum/Hrb27C/spir/jvl/Ddc/heph/poly/Pka-R1/sqd/Moe/chb/Tm1/Rop/kis/glo/chic/Rab6/unc-13/Roc1a/CkIIbeta/dlg1/unc-104/BicD/Syt1/Mical/cnc/psq/Hr51/scrib…	98		Male.marker.genes	GO:0005838	proteasome regulatory particle	13/2364	28/11938	0.00130118	0.00419362	0.00218099	Rpn8/Rpn11/Rpn7/Rpt3/Rpn10/Sem1/Rpn6/Rpn9/Rpn12/Rpt6/Uch-L5/Rpn5/Rpt4	13
Male.marker.genes	GO:0015002	heme-copper terminal oxidase activity	10/2323	21/12127	0.00289895	0.0115069	0.00775049	COX5A/COX4/cype/COX5B/COX8/COX7C/COX7A/levy/ND-MLRQ/COX6B	10		Male.marker.genes	GO:0001667	ameboidal-type cell migration	88/2449	203/12275	1.8834e-14	3.44019e-13	1.70146e-13	tsr/sosie/Lar/Rab11/sqh/Sdc/zip/sli/Lis-1/Gbeta13F/Sema1a/robo1/Dhc64C/stai/awd/veli/ths/Diap1/dlp/kuz/puc/kug/tai/Socs36E/cindr/Rala/mbc/dally/Evi5/EcR/jeb/kay/Hrb27C/ena/jing/vn/Rac1/sr/rhea/sfl/sqd/spri/Cortactin/18w/yki/robo2/mthl1/kis/bun/Akt1/bnl/salm/ab/fz/hep/mim/CASK/Stat92E/csw/Ptpmeg/smog/Ppcs/Dl/Ptpmeg2/shi/wts/Sin3A/pyr/rk/aop/shg/Pvr/Rho1/baz/Mrtf/apt/bsk/pnt/Vang/ple/Sema2a/kibra/s…	88		Male.marker.genes	GO:0030665	clathrin-coated vesicle membrane	9/2364	16/11938	0.00135907	0.00435245	0.0022636	Chc/VAChT/BicD/lqf/AP-1sigma/AP-2sigma/CG9132/Afti/AP-2mu	9
Male.marker.genes	GO:0016675	oxidoreductase activity, acting on a heme group of donors	10/2323	21/12127	0.00289895	0.0115069	0.00775049	COX5A/COX4/cype/COX5B/COX8/COX7C/COX7A/levy/ND-MLRQ/COX6B	10		Male.marker.genes	GO:0019932	second-messenger-mediated signaling	59/2449	113/12275	1.92566e-14	3.49525e-13	1.7287e-13	SPoCk/TyrR/Cam/Ca-alpha1D/DopEcR/Galphao/Nos/Spn/Oct-TyrR/Galphas/CG12290/dnc/Pka-C1/Octbeta2R/Dop2R/norpA/cac/CG42260/Octbeta3R/Cngl/Eip63F-1/Gprk2/CG17272/Nplp1/Octbeta1R/Pka-R1/5-HT7/Ac78C/Pde9/Dh31/Gycbeta100B/CG11638/Dop1R1/Ac3/CG31183/P32/Gyc89Db/Cirl/Ac13E/CanA-14F/CG34357/Pka-R2/rut/Dop1R2/rdgC/Ca-beta/Ac76E/CG43373/rk/Lgr4/5PtaseI/CG10738/Capa/Gyc32E/Pp2B-14D/Gyc88E/Pdfr/olf186-F/hang	59		Male.marker.genes	GO:0005704	polytene chromosome band	10/2364	19/11938	0.00144426	0.0045962	0.00239037	abd-A/Ubx/Abd-B/Su(var)205/trx/Psc/HP4/mod(mdg4)/Ubi-p5E/pho	10
Male.marker.genes	GO:0016676	oxidoreductase activity, acting on a heme group of donors, oxygen as acceptor	10/2323	21/12127	0.00289895	0.0115069	0.00775049	COX5A/COX4/cype/COX5B/COX8/COX7C/COX7A/levy/ND-MLRQ/COX6B	10		Male.marker.genes	GO:0001738	morphogenesis of a polarized epithelium	61/2449	119/12275	2.10114e-14	3.78994e-13	1.87444e-13	Wnt4/tsr/app/hbs/Akap200/sqh/CadN/zip/aPKC/fred/rin/CadN2/ed/Galphao/Dhc64C/Frl/sdt/stan/hwt/msn/S/puc/lola/kug/Rala/spen/nmo/otk/sty/yrt/kay/Rac1/otk2/rdx/gish/sca/caup/ara/nej/sano/fz/hep/dlg1/fwd/Dl/tow/btsz/scrib/shi/dco/mirr/aop/cno/shg/Rho1/baz/bsk/pnt/Vang/msk/spi	61		Male.marker.genes	GO:0005773	vacuole	45/2364	149/11938	0.00152848	0.00483383	0.00251396	gammaSnap1/path/CG32225/Vha26/Rab11/Vha16-1/Vha68-1/CtsB1/VhaPPA1-1/Lamp1/CG12163/CG14184/asrij/DOR/CG1275/Cp1/cathD/Atg8a/yki/Tsp42Ej/CG41099/lqf/Syt7/comm/VhaM9.7-a/Vha13/Vha36-1/VhaM9.7-b/Vha14-1/Vha44/Vha55/VhaSFD/VhaAC39-1/alphaSnap/ref(2)P/LTV1/26-29-p/Rack1/bchs/TER94/gammaSnap2/CG14812/CG6707/Rab7/MRP	45
Male.marker.genes	GO:0098960	postsynaptic neurotransmitter receptor activity	10/2323	21/12127	0.00289895	0.0115069	0.00775049	nAChRbeta2/nAChRalpha2/nAChRalpha3/nAChRalpha6/nAChRalpha7/nAChRalpha1/nAChRalpha5/nAChRbeta1/CG11155/nAChRalpha4	10		Male.marker.genes	GO:0042775	mitochondrial ATP synthesis coupled electron transport	47/2449	80/12275	2.4414e-14	4.3594e-13	2.15609e-13	ND-SGDH/ND-42/ND-ASHI/ND-B14.5B/ND-15/SdhB/SdhC/Cyt-c1/ND-19/UQCR-C2/ND-B12/ND-PDSW/UQCR-C1/COX5A/COX4/UQCR-14/CG14757/UQCR-Q/cype/COX5B/UQCR-6.4/ND-13A/COX7C/COX7A/levy/RFeSP/ND-MLRQ/ND-39/ND-B15/ND-B17.2/ND-B14/ND-23/SdhA/ND-B18/ND-51/ox/ND-24/ND-ACP/ND-20/ND-B16.6/SdhD/ND-13B/ND-49/ND-B22/ND-B14.5A/dj-1beta/UQCR-11	47		Male.marker.genes	GO:0033176	proton-transporting V-type ATPase complex	15/2364	35/11938	0.00155234	0.00487877	0.00253733	Vha26/VhaAC45/Vha16-1/Vha68-1/VhaPPA1-1/CG31030/VhaM9.7-a/Vha13/Vha36-1/VhaM9.7-b/Vha14-1/Vha44/Vha55/VhaSFD/VhaAC39-1	15
Male.marker.genes	GO:0099529	neurotransmitter receptor activity involved in regulation of postsynaptic membrane potential	10/2323	21/12127	0.00289895	0.0115069	0.00775049	nAChRbeta2/nAChRalpha2/nAChRalpha3/nAChRalpha6/nAChRalpha7/nAChRalpha1/nAChRalpha5/nAChRbeta1/CG11155/nAChRalpha4	10		Male.marker.genes	GO:0045944	positive regulation of transcription by RNA polymerase II	128/2449	342/12275	2.44706e-14	4.3594e-13	2.15609e-13	hth/abd-A/Abd-B/tsh/Antp/dsx/Ssb-c31a/Lim1/bi/toy/Tet/ap/Eip75B/schlank/Rpt3/pros/Mtor/Tl/scro/Sox102F/mam/Adf1/disco/SoxN/br/pan/tai/lilli/tou/ftz-f1/DOR/D/fs(1)h/Dsp1/Eip74EF/trx/Hr3/lolal/chn/Mad/EcR/Hr38/kay/NK7.1/Trf2/jing/NFAT/TfIIA-S/Ncoa6/Crtc/shn/Xbp1/caup/ara/TfAP-2/tup/Mef2/yki/vvl/nej/sima/onecut/CG12054/CG8677/Taf4/drm/odd/mid/acj6/hb/sno/Su(Tpl)/NC2beta/Nup153/MED10/CtBP/sd/Stat92E/…	128		Male.marker.genes	GO:0031252	cell leading edge	37/2364	117/11938	0.00157464	0.00491834	0.0025579	Lar/dpr10/dpr3/dpr15/Arpc5/zip/Rdl/dpr14/Invadolysin/dpr19/dpr13/DIP-gamma/dpr20/dpr11/dpr9/dpr8/Shawl/dpr5/dpr18/dpr17/dpr6/dpr2/mbc/dpr12/ena/Rac1/rhea/dpr4/Shaw/DIP-alpha/dpr1/Pak3/Rab35/stck/CG9784/Arp3/dpr7	37
Male.marker.genes	GO:1904315	transmitter-gated ion channel activity involved in regulation of postsynaptic membrane potential	10/2323	21/12127	0.00289895	0.0115069	0.00775049	nAChRbeta2/nAChRalpha2/nAChRalpha3/nAChRalpha6/nAChRalpha7/nAChRalpha1/nAChRalpha5/nAChRbeta1/CG11155/nAChRalpha4	10		Male.marker.genes	GO:0019725	cellular homeostasis	96/2449	231/12275	3.01269e-14	5.33412e-13	2.63817e-13	IscU/Pgk/Su(P)/Torsin/Cbp53E/mbl/sesB/fwe/nrv3/SPoCk/Nckx30C/Atox1/VhaAC45/nrv2/Txl/Atpalpha/PMCA/Cam/CG5554/Nhe3/Vha68-1/Fer2LCH/FMRFaR/CG40178/SP2353/Lis-1/Dg/CG5027/CG1090/Ndae1/robo1/Nrk/uex/SERCA/Fer1HCH/CaBP1/CG31030/CG8993/CG7484/CG10470/Scox/Manf/CG1840/nAChRalpha6/Dys/norpA/cac/alc/vimar/Trx-2/Hex-A/dysc/Mid1/Galphaq/Ank2/Plc21C/Trpgamma/Oamb/Dop1R1/Prx3/EMRE/Best1/CG7430/Jafrac1/MCU/sca…	96		Male.marker.genes	GO:0005789	endoplasmic reticulum membrane	61/2364	216/11938	0.00164675	0.00511199	0.00265862	Dad1/CG8397/CG31460/Calr/wls/CG15814/Spp/CG11999/l(1)G0320/PIG-F/CG13887/rho-5/EMC3/ste24a/EMC1/CG5027/Sec61alpha/twr/SERCA/Spase22-23/CG32441/CG17270/Sec61beta/Spase25/CG33977/Ostgamma/CG15168/CG10470/CG9662/CG1840/PIG-K/Stt3B/CG11137/S/jp/RpS26/Spase12/Xbp1/jagn/bif/CG1371/Ost48/CG3678/EMC8-9/cni/Cnx99A/OstDelta/Alg10/Desat1/CG7990/SCAP/PIG-H/ergic53/ORMDL/xit/Sec22/CG33116/CG17556/Sras/PGAP2/R…	61
Male.marker.genes	GO:1904680	peptide transmembrane transporter activity	13/2323	31/12127	0.00292415	0.0115361	0.00777019	CG8860/Tom7/Tom20/Sec61alpha/Sec61beta/Tim23/Tim8/Tom40/mge/Tim17b/CG31229/Sec61gamma/Tom70	13		Male.marker.genes	GO:0040012	regulation of locomotion	58/2449	111/12275	3.06783e-14	5.39863e-13	2.67008e-13	Trim9/Pvf3/Lar/CadN/Nrx-1/Ten-a/PlexA/zip/fra/sli/Ten-m/Ktl/Sema1a/robo1/Tbh/Diap1/stan/Rheb/kuz/puc/tai/mbc/Dscam1/Evi5/CG34401/kay/Hrb27C/ena/vn/Rac1/NetB/spri/robo2/kis/sima/chic/bnl/fz/hep/PlexB/CASK/unc-104/Ptpmeg/Hr51/CG44774/Sin3A/aop/shg/Pvr/Rho1/CG9784/Liprin-alpha/bsk/Vang/ple/Sema2a/spi/Rab1	58		Male.marker.genes	GO:0035327	transcriptionally active chromatin	14/2364	32/11938	0.0017422	0.00537533	0.00279557	Eip93F/B52/lilli/upSET/Rbp1/atms/Moe/Su(Tpl)/Utx/Mi-2/Nipped-B/Ctr9/Set1/Csl4	14
Male.marker.genes	GO:0019207	kinase regulator activity	25/2323	76/12127	0.00305938	0.0119965	0.00808028	14-3-3zeta/Socs16D/mats/Socs36E/jeb/Pdk1/Cks85A/Pka-R1/RpLP1/mnb/CycG/Pli/Atg17/CkIIbeta/Pka-R2/CG17514/CycT/pcs/CG14408/Cdk5alpha/CycJ/ASPP/Pi3K21B/koko/Socs44A	25		Male.marker.genes	GO:0009890	negative regulation of biosynthetic process	165/2449	480/12275	3.13441e-14	5.44934e-13	2.69515e-13	Torsin/abd-A/Ubx/tsh/Antp/dsx/Blimp-1/zfh2/salr/Ssb-c31a/Lim1/bi/ct/bru1/Hsc70-4/Hr4/emc/Eip78C/Eip75B/Su(var)205/l(3)neo38/vig2/Tlk/pros/Pdcd4/Unr/Nos/sbb/Sox102F/CG12384/r2d2/HP1c/CG43689/gpp/eIF4EHP/pan/Gug/bin3/AstC/scrt/Rbfox1/D/CG9932/orb/CG12605/erm/jim/fs(1)h/corto/Dsp1/msi/AGO1/Smr/Hr3/crol/lolal/JIL-1/chn/cic/Mad/EcR/Sirt1/Psc/orb2/Hrb27C/brat/Su(z)2/jing/bru3/heph/CG8036/rhea/pum/sqd/u…	165		Male.marker.genes	GO:0005839	proteasome core complex	12/2364	26/11938	0.0021197	0.00640093	0.00332896	Prosalpha6/Prosbeta1/Prosbeta3/Prosbeta2/Prosalpha7/Prosbeta4/Prosbeta5/Prosbeta6/Prosalpha2/Prosalpha5/Prosalpha3/Prosalpha4	12
Male.marker.genes	GO:0008201	heparin binding	9/2323	18/12127	0.00310472	0.0120285	0.00810182	Appl/PlexA/miple1/sli/Sema1a/robo1/Toll-6/Ccn/vn	9		Male.marker.genes	GO:0031327	negative regulation of cellular biosynthetic process	165/2449	480/12275	3.13441e-14	5.44934e-13	2.69515e-13	Torsin/abd-A/Ubx/tsh/Antp/dsx/Blimp-1/zfh2/salr/Ssb-c31a/Lim1/bi/ct/bru1/Hsc70-4/Hr4/emc/Eip78C/Eip75B/Su(var)205/l(3)neo38/vig2/Tlk/pros/Pdcd4/Unr/Nos/sbb/Sox102F/CG12384/r2d2/HP1c/CG43689/gpp/eIF4EHP/pan/Gug/bin3/AstC/scrt/Rbfox1/D/CG9932/orb/CG12605/erm/jim/fs(1)h/corto/Dsp1/msi/AGO1/Smr/Hr3/crol/lolal/JIL-1/chn/cic/Mad/EcR/Sirt1/Psc/orb2/Hrb27C/brat/Su(z)2/jing/bru3/heph/CG8036/rhea/pum/sqd/u…	165		Male.marker.genes	GO:0045171	intercellular bridge	12/2364	26/11938	0.0021197	0.00640093	0.00332896	Btk29A/14-3-3zeta/sosie/14-3-3epsilon/sqh/Src64B/cindr/chb/pnut/Lpin/hts/dock	12
Male.marker.genes	GO:0015662	ATPase activity, coupled to transmembrane movement of ions, phosphorylative mechanism	9/2323	18/12127	0.00310472	0.0120285	0.00810182	nrv3/SPoCk/nrv2/Atpalpha/PMCA/SERCA/rdgB/Vha13/Vha44	9		Male.marker.genes	GO:0120035	regulation of plasma membrane bounded cell projection organization	70/2449	148/12275	4.89335e-14	8.45641e-13	4.1824e-13	Rtca/Imp/tsr/Trim9/ham/Lar/CadN/CaMKII/PlexA/tutl/pros/fra/aPKC/shot/Lis-1/Sema1a/Sar1/robo1/stan/Arpc1/Rheb/Adf1/nudC/Prosap/kuz/kug/Dlic/Dscam1/CG34401/ena/DAAM/Rac1/Ret/NetB/Abl/G9a/Tm1/vvl/Rop/trio/Akt1/bif/chic/kra/mav/sif/fz/PsGEF/hep/PlexB/C1GalTA/RhoGAPp190/unc-104/Nedd4/cv-c/Hr51/comm/wts/Rab35/Rho1/baz/Liprin-alpha/Arp3/kn/Vang/Sema2a/CG42797/twf/Rab1/kon	70		Male.marker.genes	GO:0009986	cell surface	25/2364	72/11938	0.00212521	0.00640093	0.00332896	Wnt4/wry/plx/Mmp2/Cals/Sdc/Hsp83/Con/Toll-7/Nlg4/CadN2/ed/CG5027/Tl/dlp/Dtg/qvr/Nlg2/eys/Gfrl/Nlg3/dally/Ret/kirre/Dl	25
Male.marker.genes	GO:0005230	extracellular ligand-gated ion channel activity	19/2323	53/12127	0.00317783	0.0122384	0.00824325	nAChRbeta2/nAChRalpha2/Rdl/Nmdar2/nAChRalpha3/GluRIB/GluRIA/pHCl-1/GluClalpha/nAChRalpha6/nAChRalpha7/nAChRalpha1/nAChRalpha5/nAChRbeta1/Lcch3/CG11155/nAChRalpha4/Nmdar1/Grd	19		Male.marker.genes	GO:0042773	ATP synthesis coupled electron transport	48/2449	84/12275	5.68673e-14	9.76899e-13	4.83158e-13	ND-SGDH/ND-42/ND-ASHI/ND-B14.5B/ND-15/SdhB/SdhC/Cyt-c1/ND-19/UQCR-C2/ND-B12/ND-PDSW/UQCR-C1/COX5A/COX4/UQCR-14/CG14757/UQCR-Q/cype/COX5B/UQCR-6.4/ND-13A/COX7C/COX7A/levy/RFeSP/ND-MLRQ/ND-39/ND-B15/ND-B17.2/ND-B14/ND-23/SdhA/ND-75/ND-B18/ND-51/ox/ND-24/ND-ACP/ND-20/ND-B16.6/SdhD/ND-13B/ND-49/ND-B22/ND-B14.5A/dj-1beta/UQCR-11	48		Male.marker.genes	GO:0044437	vacuolar part	25/2364	72/11938	0.00212521	0.00640093	0.00332896	gammaSnap1/CG32225/Vha26/Vha16-1/Vha68-1/VhaPPA1-1/Lamp1/CG1275/Atg8a/comm/VhaM9.7-a/Vha13/Vha36-1/VhaM9.7-b/Vha14-1/Vha44/Vha55/VhaSFD/VhaAC39-1/alphaSnap/LTV1/gammaSnap2/CG6707/Rab7/MRP	25
Male.marker.genes	GO:0017016	Ras GTPase binding	48/2323	172/12127	0.00319751	0.0122414	0.00824522	Gdi/CG43658/plx/Fs(2)Ket/Cdep/GEFmeso/Tomosyn/Frl/Fife/Exn/nuf/mbc/Evi5/RhoGDI/Ziz/Tnpo/DAAM/Magi/C3G/CG32506/spg/CG42674/spri/PDZ-GEF/trio/sif/RhoGEF3/PsGEF/Zir/Trs31/BicD/Pak3/Rgl/btsz/strat/cno/Rph/pns/GAPcenA/CG34393/CG5916/CG9098/Rlip/msk/CG7324/Bet5/hook/Sec16	48		Male.marker.genes	GO:0090130	tissue migration	83/2449	190/12275	6.21453e-14	1.06125e-12	5.24877e-13	tsr/sosie/Lar/Rab11/sqh/Sdc/zip/sli/Lis-1/robo1/Dhc64C/stai/awd/veli/Diap1/dlp/kuz/puc/kug/tai/Socs36E/cindr/Rala/mbc/dally/Evi5/EcR/jeb/kay/Hrb27C/ena/jing/vn/Rac1/sr/rhea/sfl/sqd/spri/Cortactin/18w/yki/robo2/mthl1/kis/bun/Akt1/bnl/salm/ab/fz/hep/mim/CASK/Stat92E/csw/Ptpmeg/Ppcs/Dl/Ptpmeg2/shi/wts/Sin3A/pyr/rk/aop/shg/Pvr/Rho1/baz/Mrtf/apt/bsk/pnt/Vang/ple/kibra/spi/twf/Vhl/Rab7/dome/dop	83		Male.marker.genes	GO:0000276	mitochondrial proton-transporting ATP synthase complex, coupling factor F(o)	8/2364	14/11938	0.002228	0.00659279	0.00342874	ATPsynF/ATPsynCF6/ATPsynB/ATPsynG/ATPsynC/ATPsynD/ATPsynE/CG10731	8
Male.marker.genes	GO:0015450	P-P-bond-hydrolysis-driven protein transmembrane transporter activity	10/2323	22/12127	0.00441226	0.0167925	0.0113107	CG8860/Tom7/Tom20/Sec61beta/Tim8/Tom40/mge/CG31229/Sec61gamma/Tom70	10		Male.marker.genes	GO:0009953	dorsal/ventral pattern formation	71/2449	152/12275	7.09927e-14	1.20521e-12	5.96075e-13	gammaSnap1/tsh/ap/Syp/14-3-3epsilon/put/CkIIalpha/tsu/CSN5/nmd/faf/bai/Cow/eca/drpr/enc/rin/Lis-1/Hs3st-B/Dhc64C/Tl/sbb/dlp/S/crb/lilli/tld/flw/D/orb/nuf/CG1943/CG5890/nmo/dally/lolal/cic/sty/Parp/tara/jvl/sqd/shn/Mpcp2/skd/osa/glo/sno/Su(Tpl)/CkIIbeta/BicD/csw/CG14073/H/cnc/Dl/Pkc98E/cact/pAbp/Sulf1/cni/cbt/capt/sog/CrebA/vg/pnt/tkv/Axn/Dll/Rab7	71		Male.marker.genes	GO:0005927	muscle tendon junction	8/2364	14/11938	0.002228	0.00659279	0.00342874	shot/LRR/Abl/Kank/wech/Swip-1/Pax/kon	8
Male.marker.genes	GO:0031267	small GTPase binding	48/2323	175/12127	0.00461313	0.0173839	0.011709	Gdi/CG43658/plx/Fs(2)Ket/Cdep/GEFmeso/Tomosyn/Frl/Fife/Exn/nuf/mbc/Evi5/RhoGDI/Ziz/Tnpo/DAAM/Magi/C3G/CG32506/spg/CG42674/spri/PDZ-GEF/trio/sif/RhoGEF3/PsGEF/Zir/Trs31/BicD/Pak3/Rgl/btsz/strat/cno/Rph/pns/GAPcenA/CG34393/CG5916/CG9098/Rlip/msk/CG7324/Bet5/hook/Sec16	48		Male.marker.genes	GO:0031344	regulation of cell projection organization	70/2449	149/12275	7.45323e-14	1.2579e-12	6.22135e-13	Rtca/Imp/tsr/Trim9/ham/Lar/CadN/CaMKII/PlexA/tutl/pros/fra/aPKC/shot/Lis-1/Sema1a/Sar1/robo1/stan/Arpc1/Rheb/Adf1/nudC/Prosap/kuz/kug/Dlic/Dscam1/CG34401/ena/DAAM/Rac1/Ret/NetB/Abl/G9a/Tm1/vvl/Rop/trio/Akt1/bif/chic/kra/mav/sif/fz/PsGEF/hep/PlexB/C1GalTA/RhoGAPp190/unc-104/Nedd4/cv-c/Hr51/comm/wts/Rab35/Rho1/baz/Liprin-alpha/Arp3/kn/Vang/Sema2a/CG42797/twf/Rab1/kon	70		Male.marker.genes	GO:0045263	proton-transporting ATP synthase complex, coupling factor F(o)	8/2364	14/11938	0.002228	0.00659279	0.00342874	ATPsynF/ATPsynCF6/ATPsynB/ATPsynG/ATPsynC/ATPsynD/ATPsynE/CG10731	8
Male.marker.genes	GO:0022835	transmitter-gated channel activity	17/2323	47/12127	0.00462139	0.0173839	0.011709	nAChRbeta2/nAChRalpha2/Rdl/Nmdar2/nAChRalpha3/GluRIB/GluRIA/nAChRalpha6/nAChRalpha7/nAChRalpha1/nAChRalpha5/nAChRbeta1/Lcch3/CG11155/nAChRalpha4/Nmdar1/Grd	17		Male.marker.genes	GO:0019935	cyclic-nucleotide-mediated signaling	41/2449	66/12275	7.72246e-14	1.29576e-12	6.4086e-13	TyrR/DopEcR/Oct-TyrR/Galphas/CG12290/dnc/Pka-C1/Octbeta2R/Dop2R/CG42260/Octbeta3R/Cngl/Gprk2/Nplp1/Octbeta1R/Pka-R1/5-HT7/Ac78C/Pde9/Dh31/Gycbeta100B/Dop1R1/Ac3/CG31183/Gyc89Db/Cirl/Ac13E/CG34357/Pka-R2/rut/Dop1R2/Ac76E/CG43373/rk/Lgr4/CG10738/Capa/Gyc32E/Gyc88E/Pdfr/hang	41		Male.marker.genes	GO:0030141	secretory granule	10/2364	20/11938	0.00237954	0.00700027	0.00364067	Rab11/7B2/Chc/olf413/cmpy/Tbh/Syt1/Rab27/Snap24/Rph	10
Male.marker.genes	GO:0008013	beta-catenin binding	6/2323	10/12127	0.00506947	0.0188503	0.0126967	CadN/pan/Apc/Hipk/shg/Axn	6		Male.marker.genes	GO:0044089	positive regulation of cellular component biogenesis	68/2449	143/12275	8.10287e-14	1.35173e-12	6.68543e-13	nwk/Ssb-c31a/chinmo/CG43658/Lar/Su(var)205/Rpt3/Arpc5/Cals/Sdc/aPKC/shot/svr/Jupiter/ringer/Arpc4/Arpc3A/wit/Arpc1/Rheb/Taf11/IRSp53/Octbeta2R/cac/kug/CG11486/nmo/Mad/ena/spir/DAAM/Rac1/Ank2/mnb/Abl/gish/Vrp1/chb/simj/trio/chic/kra/sif/RhoBTB/PsGEF/hep/dlg1/Pak3/Stat92E/Nedd4/Rpt6/shi/Cip4/Rab35/dco/Top3beta/cal1/sals/Arpc2/Arp3/capu/tkv/Rpt4/Rack1/CG1674/Lam/Synd/kon	68		Male.marker.genes	GO:0099513	polymeric cytoskeletal fiber	40/2364	132/11938	0.00252976	0.00739917	0.00384812	betaTub56D/Msp300/alphaTub84B/sqh/futsch/shot/Lis-1/Dhc64C/awd/Jupiter/ringer/pigs/CG14535/klar/Lk6/Klp98A/tau/Apc/pod1/Cortactin/CLIP-190/Moe/Vrp1/chb/Tm1/alphaTub84D/tacc/Kif3C/Kank/Ran/unc-104/Khc-73/gammaTub23C/Tctp/Arp3/capu/hts/twf/Lam/CG6891	40
Male.marker.genes	GO:0036122	BMP binding	6/2323	10/12127	0.00506947	0.0188503	0.0126967	put/cmpy/wit/cv-2/sog/tkv	6		Male.marker.genes	GO:0010631	epithelial cell migration	80/2449	181/12275	8.16523e-14	1.3543e-12	6.69815e-13	tsr/sosie/Lar/Rab11/sqh/Sdc/zip/sli/Lis-1/robo1/Dhc64C/stai/awd/veli/Diap1/dlp/kuz/puc/kug/tai/Socs36E/cindr/Rala/mbc/dally/Evi5/EcR/kay/Hrb27C/ena/jing/vn/Rac1/sr/rhea/sfl/sqd/spri/Cortactin/18w/yki/robo2/kis/bun/Akt1/bnl/salm/ab/fz/hep/mim/CASK/Stat92E/csw/Ptpmeg/Ppcs/Dl/Ptpmeg2/shi/wts/Sin3A/rk/aop/shg/Pvr/Rho1/baz/Mrtf/apt/bsk/pnt/Vang/ple/kibra/spi/twf/Vhl/Rab7/dome/dop	80		Male.marker.genes	GO:0098827	endoplasmic reticulum subcompartment	62/2364	224/11938	0.0025586	0.00744053	0.00386963	Dad1/CG8397/CG31460/Calr/wls/CG15814/Spp/CG11999/l(1)G0320/PIG-F/CG13887/rho-5/EMC3/ste24a/EMC1/CG5027/Sec61alpha/twr/SERCA/Spase22-23/CG32441/CG17270/Sec61beta/Spase25/CG33977/Ostgamma/CG15168/CG10470/CG9662/CG1840/PIG-K/Stt3B/CG11137/S/jp/RpS26/Spase12/Xbp1/jagn/bif/CG1371/Ost48/CG3678/rdgB/EMC8-9/cni/Cnx99A/OstDelta/Alg10/Desat1/CG7990/SCAP/PIG-H/ergic53/ORMDL/xit/Sec22/CG33116/CG17556/Sras/PG…	62
Male.marker.genes	GO:0008146	sulfotransferase activity	8/2323	16/12127	0.00529385	0.0195721	0.0131829	CG31637/Hs3st-B/Hs3st-A/St3/CG14024/sfl/Hs6st/CG13937	8		Male.marker.genes	GO:0099003	vesicle-mediated transport in synapse	59/2449	116/12275	8.78799e-14	1.44927e-12	7.16783e-13	gammaSnap1/sesB/fwe/cpx/Rab3/Rab11/Nrx-1/nSyb/Chc/Dap160/Nlg4/Tomosyn/GABA-B-R2/unc-13-4A/Nrx-IV/Syx1A/Nlg2/Syx6/Fife/Rim/Nlg3/brat/Sytbeta/NFAT/Syt4/mnb/Cadps/Snap25/Rop/Dab/Syn/unc-13/Syx13/CASK/Blos1/unc-104/BicD/Syt1/stj/lqf/Syt7/shi/Snap24/Arf102F/Aplip1/EndoA/Syngr/Drp1/Eps-15/Rph/alphaSnap/Liprin-alpha/X11L/twf/gammaSnap2/Arf51F/Syx7/Synd/lqfR	59		Male.marker.genes	GO:0055037	recycling endosome	17/2364	44/11938	0.00298867	0.00864152	0.00449424	nwk/Fas3/RabX4/Rab11/Nhe3/aph-1/wit/asrij/nuf/Evi5/Rab26/Rab14/Rab21/Rab4/pen-2/shg/Arf51F	17
Male.marker.genes	GO:0043021	ribonucleoprotein complex binding	19/2323	56/12127	0.00633787	0.0232989	0.0156931	Mtor/eIF4H1/orb/eEF5/RpS21/orb2/pix/RpLP1/sta/eIF1/kra/P32/CG17514/loqs/Prp31/barc/CG5989/eEF2/Rack1	19		Male.marker.genes	GO:0032535	regulation of cellular component size	79/2449	178/12275	8.90149e-14	1.45964e-12	7.21915e-13	Btk29A/path/nwk/chinmo/bru1/Pvf3/Lar/Arpc5/CadN/shot/svr/Hs3st-B/Sema1a/Arpc4/Arpc3A/stan/Arpc1/Rheb/IRSp53/kuz/lilli/Src64B/Alk/ena/Pdk1/spir/DAAM/Rac1/sNPF/Abl/Cortactin/gish/Vrp1/pico/Akt1/bif/Kank/chic/Best1/fz/RhoBTB/PsGEF/icln/RhoGAPp190/hppy/RasGAP1/foxo/Nipped-B/Hr51/btsz/shi/Cip4/dco/InR/Desat1/sals/Arpc2/Pvr/CG10738/Tctp/Pi3K21B/Myc/Liprin-alpha/Nup62/LTV1/Arp3/capu/tmod/Vang/hts/Sema2a…	79		Male.marker.genes	GO:0005686	U2 snRNP	12/2364	27/11938	0.0031356	0.00896391	0.0046619	SmE/SmD3/Sf3b6/Sf3b5/SmB/SmD1/barc/Sf3b2/SNRPG/SmD2/Phf5a/U2A	12
Male.marker.genes	GO:0005048	signal sequence binding	10/2323	23/12127	0.00648391	0.0234362	0.0157856	Tom20/Fs(2)Ket/SsRbeta/KdelR/Sec61alpha/Srp14/Tnpo/Nup153/CG31229/Karybeta3	10		Male.marker.genes	GO:0006119	oxidative phosphorylation	54/2449	102/12275	1.1625e-13	1.89547e-12	9.37469e-13	ND-SGDH/ND-42/ND-ASHI/ND-B14.5B/ND-15/Pgk/SdhB/SdhC/Cyt-c1/ND-19/UQCR-C2/ND-B12/ND-PDSW/UQCR-C1/ATPsynbeta/COX5A/COX4/UQCR-14/CG14757/Cyt-c-p/UQCR-Q/cype/COX5B/UQCR-6.4/ND-13A/COX7C/COX7A/CG7834/levy/RFeSP/ND-MLRQ/ND-39/ND-B15/ATPsynO/ND-B17.2/ND-B14/ND-23/SdhA/ND-75/ND-B18/ND-51/ox/ND-24/ND-ACP/ND-20/ND-B16.6/SdhD/ND-13B/ND-49/ND-B22/ND-B14.5A/dj-1beta/UQCR-11/Tspo	54		Male.marker.genes	GO:0099572	postsynaptic specialization	12/2364	27/11938	0.0031356	0.00896391	0.0046619	Fas2/Spn/eIF4E1/nAChRalpha7/Prosap/Neto/Magi/pum/dlg1/scrib/shi/hts	12
Male.marker.genes	GO:0019905	syntaxin binding	10/2323	23/12127	0.00648391	0.0234362	0.0157856	gammaSnap1/cpx/Tomosyn/Sytbeta/Snap25/unc-13/Syt1/Snap24/alphaSnap/gammaSnap2	10		Male.marker.genes	GO:0090132	epithelium migration	80/2449	182/12275	1.17656e-13	1.90762e-12	9.43478e-13	tsr/sosie/Lar/Rab11/sqh/Sdc/zip/sli/Lis-1/robo1/Dhc64C/stai/awd/veli/Diap1/dlp/kuz/puc/kug/tai/Socs36E/cindr/Rala/mbc/dally/Evi5/EcR/kay/Hrb27C/ena/jing/vn/Rac1/sr/rhea/sfl/sqd/spri/Cortactin/18w/yki/robo2/kis/bun/Akt1/bnl/salm/ab/fz/hep/mim/CASK/Stat92E/csw/Ptpmeg/Ppcs/Dl/Ptpmeg2/shi/wts/Sin3A/rk/aop/shg/Pvr/Rho1/baz/Mrtf/apt/bsk/pnt/Vang/ple/kibra/spi/twf/Vhl/Rab7/dome/dop	80		Male.marker.genes	GO:0031965	nuclear membrane	14/2364	34/11938	0.00345972	0.00978062	0.00508665	14-3-3zeta/Msp300/bru1/Fas3/schlank/Mtor/klar/toc/Sirt1/bif/Ref1/CG8111/TER94/CG6659	14
Male.marker.genes	GO:0031369	translation initiation factor binding	10/2323	23/12127	0.00648391	0.0234362	0.0157856	eIF4G1/eIF4E1/pix/eIF3m/kra/Rpb7/eIF3f1/eIF3b/Thor/mxt	10		Male.marker.genes	GO:0042127	regulation of cell proliferation	95/2449	232/12275	1.20843e-13	1.94834e-12	9.63618e-13	DENR/hth/COX5A/COX4/UQCR-14/tsh/Wnt4/COX7C/ham/Nurf-38/Mmp2/CSN5/Hsp83/Actbeta/pros/aPKC/Dap160/Tl/Nos/fz2/lwr/CG17059/DCTN3-p24/cpo/SoxN/crb/pan/numb/Mkp3/erm/Smox/EcR/RpS21/brat/vn/CG7834/Pkc53E/Csk/Abl/Ddr/CG1572/Moe/yki/Sod2/CG5214/bun/osa/pxb/Akt1/mtd/hb/Bgb/CG6770/fz/MED22/Mnn1/Xrp1/MED10/dlg1/sd/Stat92E/Nedd4/Utx/foxo/hfp/ey/Dif/Dl/Pkc98E/scrib/wts/Sin3A/pyr/InR/Vsx1/Ctr9/CG3277/Pvr/CG1328…	95		Male.marker.genes	GO:0000118	histone deacetylase complex	11/2364	24/11938	0.00345994	0.00978062	0.00508665	CG16779/Smr/simj/MBD-like/Bin1/Mi-2/HDAC4/CG44774/Sin3A/lid/MTA1-like	11
Male.marker.genes	GO:0042887	amide transmembrane transporter activity	13/2323	34/12127	0.00745176	0.0266558	0.0179541	CG8860/Tom7/Tom20/Sec61alpha/Sec61beta/Tim23/Tim8/Tom40/mge/Tim17b/CG31229/Sec61gamma/Tom70	13		Male.marker.genes	GO:0022904	respiratory electron transport chain	50/2449	91/12275	1.39271e-13	2.23298e-12	1.10439e-12	ND-SGDH/ND-42/ND-ASHI/ND-B14.5B/ND-15/SdhB/SdhC/Cyt-c1/ND-19/UQCR-C2/ND-B12/ND-PDSW/UQCR-C1/COX5A/COX4/UQCR-14/CG14757/UQCR-Q/cype/COX5B/UQCR-6.4/ND-13A/COX7C/COX7A/GC1/levy/RFeSP/ND-MLRQ/ND-39/ND-B15/ND-B17.2/ND-B14/ND-23/SdhA/ND-75/ND-B18/ND-51/ox/ND-24/ND-ACP/ND-20/ND-B16.6/SdhD/ND-13B/ND-49/ND-B22/ND-B14.5A/dj-1beta/NP15.6/UQCR-11	50		Male.marker.genes	GO:0031225	anchored component of membrane	7/2364	12/11938	0.00366089	0.0102912	0.00535218	beat-VI/bou/dlp/Gfrl/dally/gish/twit	7
Male.marker.genes	GO:0017048	Rho GTPase binding	17/2323	49/12127	0.00745703	0.0266558	0.0179541	CG43658/Cdep/GEFmeso/Frl/Exn/mbc/RhoGDI/Ziz/DAAM/spg/CG42674/trio/sif/RhoGEF3/PsGEF/Zir/Pak3	17		Male.marker.genes	GO:0010558	negative regulation of macromolecule biosynthetic process	160/2449	469/12275	1.62762e-13	2.58094e-12	1.27649e-12	abd-A/Ubx/tsh/Antp/dsx/Blimp-1/zfh2/salr/Ssb-c31a/Lim1/bi/ct/bru1/Hsc70-4/Hr4/emc/Eip78C/Eip75B/Su(var)205/l(3)neo38/vig2/Tlk/pros/Pdcd4/Unr/Nos/sbb/Sox102F/CG12384/r2d2/HP1c/CG43689/gpp/eIF4EHP/pan/Gug/bin3/scrt/Rbfox1/D/CG9932/orb/CG12605/erm/jim/fs(1)h/corto/Dsp1/msi/AGO1/Smr/Hr3/crol/lolal/JIL-1/chn/cic/Mad/EcR/Sirt1/Psc/orb2/Hrb27C/brat/Su(z)2/jing/bru3/heph/CG8036/rhea/pum/sqd/upSET/shn/CG4…	160		Male.marker.genes	GO:0032153	cell division site	17/2364	45/11938	0.00393141	0.0109829	0.00571193	Arl4/Rab11/sqh/zip/Tl/cindr/nuf/Moe/Lrch/Cip4/pnut/Rho1/Amph/CG15602/Rab1/Arf51F/Synd	17
Male.marker.genes	GO:0043022	ribosome binding	11/2323	27/12127	0.0078328	0.0278452	0.0187552	orb/eEF5/RpS21/orb2/sta/kra/P32/CG17514/CG5989/eEF2/Rack1	11		Male.marker.genes	GO:2000113	negative regulation of cellular macromolecule biosynthetic process	160/2449	469/12275	1.62762e-13	2.58094e-12	1.27649e-12	abd-A/Ubx/tsh/Antp/dsx/Blimp-1/zfh2/salr/Ssb-c31a/Lim1/bi/ct/bru1/Hsc70-4/Hr4/emc/Eip78C/Eip75B/Su(var)205/l(3)neo38/vig2/Tlk/pros/Pdcd4/Unr/Nos/sbb/Sox102F/CG12384/r2d2/HP1c/CG43689/gpp/eIF4EHP/pan/Gug/bin3/scrt/Rbfox1/D/CG9932/orb/CG12605/erm/jim/fs(1)h/corto/Dsp1/msi/AGO1/Smr/Hr3/crol/lolal/JIL-1/chn/cic/Mad/EcR/Sirt1/Psc/orb2/Hrb27C/brat/Su(z)2/jing/bru3/heph/CG8036/rhea/pum/sqd/upSET/shn/CG4…	160		Male.marker.genes	GO:0030125	clathrin vesicle coat	8/2364	15/11938	0.00395037	0.0109829	0.00571193	Chc/VAChT/lqf/AP-1sigma/AP-2sigma/CG9132/Afti/AP-2mu	8
Male.marker.genes	GO:0005262	calcium channel activity	16/2323	46/12127	0.00904553	0.0319806	0.0215407	fwe/Nckx30C/Ca-alpha1T/CG4587/Ca-alpha1D/CG1090/CG10470/cac/jp/Mid1/Trpgamma/MCU/stj/Ca-beta/olf186-F/RyR	16		Male.marker.genes	GO:0034330	cell junction organization	48/2449	86/12275	1.92986e-13	3.04348e-12	1.50526e-12	kune/pasi2/crim/p120ctn/pasi1/pyd/cold/Lac/nrv2/pck/Mmp2/Cont/Rab11/Atpalpha/shakB/Nrg/aPKC/CadN2/sns/Galphao/Nrx-IV/awd/bou/sdt/crb/Src64B/cindr/Magi/Rac1/Csk/kirre/PDZ-GEF/Src42A/CG44325/CG42748/dlg1/arm/cora/btsz/scrib/shi/Cip4/stck/shg/wun/Rho1/baz/vari	48		Male.marker.genes	GO:0030136	clathrin-coated vesicle	12/2364	28/11938	0.00451141	0.0124064	0.00645224	Rab11/Chc/VAChT/BicD/lqf/AP-1sigma/AP-2sigma/syd/CG9132/Afti/AP-2mu/dock	12
Male.marker.genes	GO:0070851	growth factor receptor binding	10/2323	24/12127	0.00923695	0.0320295	0.0215736	Pvf3/ed/ths/kek1/vn/PVRAP/bnl/dlg1/pyr/spi	10		Male.marker.genes	GO:0042692	muscle cell differentiation	62/2449	127/12275	2.28717e-13	3.58737e-12	1.77426e-12	Tpi/Pgk/abd-A/Ubx/Antp/PyK/Pglym78/Gapdh1/hbs/mspo/bru1/SelR/Bsg/zip/mask/Dg/sns/Smn/br/numb/CanB2/mbc/siz/sty/jeb/DAAM/Rac1/C3G/rhea/rst/kirre/Vrp1/caup/ara/tup/Mef2/Akt1/C1GalTA/sd/Pak3/Mical/Nedd4/foxo/pcs/InR/Pax/zfh1/aop/sals/Rho1/Arp3/slou/pnt/kn/Scgdelta/hts/up/Thor/Arf51F/kon/tn/dock	62		Male.marker.genes	GO:0030496	midbody	12/2364	28/11938	0.00451141	0.0124064	0.00645224	sqh/Cam/Mtor/smt3/cindr/nuf/toc/shrb/Map205/Cip4/CG15602/Synd	12
Male.marker.genes	GO:0019838	growth factor binding	6/2323	11/12127	0.00935639	0.0320295	0.0215736	cmpy/wit/kek6/Pvr/ImpL2/tkv	6		Male.marker.genes	GO:0048732	gland development	81/2449	188/12275	3.10388e-13	4.84206e-12	2.3948e-12	Btk29A/Idh3b/hth/Abd-B/tsh/Antp/Wnt4/hdc/trn/put/BI-1/caps/CSN5/Cam/ctp/zip/fra/drpr/sli/robo1/drl/fz2/lwr/ths/SmD3/asrij/br/crb/pan/kuz/lola/kug/Src64B/rho/hid/Drl-2/Eip74EF/lolal/sty/Mad/EcR/jeb/RpS21/Trf2/Tnpo/Rac1/NetB/RpS8/shn/Src42A/tup/robo2/mew/Atg17/chic/Mdh2/hb/rpr/fz/Stat92E/Utx/Dif/btsz/shi/pyr/exd/neur/raw/zfh1/fkh/sog/shg/Pvr/CrebA/Rho1/pnt/kn/tkv/trh/IP3K2/E2f1	81		Male.marker.genes	GO:0044432	endoplasmic reticulum part	67/2364	251/11938	0.00457241	0.0125062	0.00650414	Dad1/CG8397/Torsin/CG31460/Calr/wls/CG15814/Spp/Hsc70-3/CG11999/l(1)G0320/PIG-F/CG13887/rho-5/EMC3/ste24a/EMC1/CG5027/Sar1/Sec61alpha/twr/SERCA/Spase22-23/CG32441/CG17270/Sec61beta/boca/Spase25/CG33977/Ostgamma/CG15168/CG10470/CG9662/CG1840/PIG-K/Stt3B/CG11137/S/jp/RpS26/Spase12/Xbp1/jagn/bif/CG1371/Ost48/CG3678/rdgB/EMC8-9/cni/Cnx99A/OstDelta/Alg10/Desat1/CG7990/SCAP/PIG-H/ergic53/ORMDL/xit/Sec2…	67
Male.marker.genes	GO:0022840	leak channel activity	6/2323	11/12127	0.00935639	0.0320295	0.0215736	CG42594/CG1688/CG42340/Task7/CG43155/Task6	6		Male.marker.genes	GO:0042461	photoreceptor cell development	58/2449	116/12275	3.69091e-13	5.72687e-12	2.83242e-12	mbl/tsr/Lar/Rab11/CadN/Cam/Bsg/tutl/cnn/Ten-m/EMC3/SP2353/CadN2/Lis-1/Nrk/sdt/stan/CSN8/klar/msn/Mbs/crb/lola/lilli/vimar/tinc/eys/Alk/sty/yrt/EcR/jeb/dysc/Rac1/tau/PDZ-GEF/Moe/RhoGAP100F/Dab/dac/Rab6/sno/Mob2/csw/pAbp/AP-1sigma/neur/oc/p47/capt/ben/baz/Liprin-alpha/Amph/pnt/Afti/Syn2/msk	58		Male.marker.genes	GO:0019898	extrinsic component of membrane	25/2364	76/11938	0.00482406	0.0131235	0.00682521	Ggamma30A/klg/Socs16D/CadN2/Gbeta13F/Galphao/Galphas/norpA/Src64B/Socs36E/mbc/Galphaq/Rac1/Abl/Src42A/Rop/trio/Atg17/arm/Atg6/shg/Pi3K21B/ninaC/Pldn/Socs44A	25
Male.marker.genes	GO:0022841	potassium ion leak channel activity	6/2323	11/12127	0.00935639	0.0320295	0.0215736	CG42594/CG1688/CG42340/Task7/CG43155/Task6	6		Male.marker.genes	GO:0007156	homophilic cell adhesion via plasma membrane adhesion molecules	32/2449	46/12275	4.14554e-13	6.39788e-12	3.16429e-12	Cad87A/hbs/klg/Fas3/Lar/Lac/caps/Cont/CadN/Cals/Bsg/tutl/Dscam2/Con/CG7166/CadN2/ed/sns/Fas1/Fas2/stan/CG44153/kug/Dscam3/sdk/Dscam4/rst/kirre/fz/shg/CG13506/ImpL2	32		Male.marker.genes	GO:0033177	proton-transporting two-sector ATPase complex, proton-transporting domain	13/2364	32/11938	0.00548436	0.01484	0.00771793	ATPsynF/ATPsynCF6/ATPsynB/Vha16-1/VhaPPA1-1/ATPsynG/ATPsynC/ATPsynD/ATPsynE/VhaM9.7-a/VhaM9.7-b/VhaAC39-1/CG10731	13
Male.marker.genes	GO:0022842	narrow pore channel activity	6/2323	11/12127	0.00935639	0.0320295	0.0215736	CG42594/CG1688/CG42340/Task7/CG43155/Task6	6		Male.marker.genes	GO:0050795	regulation of behavior	51/2449	96/12275	4.67515e-13	7.17685e-12	3.54955e-12	Gabat/Trim9/trsn/Hsp83/Rdl/bai/eca/p24-1/CHOp24/Ktl/rho-5/5-HT1A/Nca/Tbh/Galphas/Ih/qvr/Pka-C1/Mbs/Hk/AGO1/Alk/EcR/Sirt1/wake/Rac1/Pka-R1/Dh31/mnb/Oamb/Dop1R1/TfAP-2/5-HT2A/Shab/sNPF-R/Acer/SPR/Sh/foxo/rut/Dop1R2/InR/Lkr/dod/mld/tim/Rho1/Ets96B/Pdfr/Gadd45/Mip	51		Male.marker.genes	GO:0016528	sarcoplasm	6/2364	10/11938	0.00602792	0.0161382	0.00839309	SERCA/jp/DAAM/Tm1/Syt7/RyR	6
Male.marker.genes	GO:0050145	nucleoside monophosphate kinase activity	6/2323	11/12127	0.00935639	0.0320295	0.0215736	Dak1/sdt/dlg1/Adk1/Adk2/CG11811	6		Male.marker.genes	GO:0051962	positive regulation of nervous system development	64/2449	135/12275	5.20729e-13	7.95145e-12	3.93266e-12	Imp/CG10257/Cals/Sdc/ctp/PlexA/Actbeta/pros/aPKC/shot/Dap160/Lis-1/Sar1/Dhc64C/stan/wit/Rheb/nudC/Octbeta2R/Prosap/cac/Src64B/nmo/Mad/Smox/EcR/Rac1/Ank2/mnb/spg/G9a/Src42A/yki/simj/Rop/trio/bun/Akt1/Dab/chic/fz/PlexB/Roc1a/dlg1/Pak3/da/Nedd4/RasGAP1/Hr51/pyr/InR/Top3beta/oc/Myc/Arp3/bsk/pnt/tkv/Vang/klu/spi/twf/Rab1/Synd	64		Male.marker.genes	GO:0030140	trans-Golgi network transport vesicle	6/2364	10/11938	0.00602792	0.0161382	0.00839309	Rab11/Chc/VAChT/AP-1sigma/syd/Afti	6
Male.marker.genes	GO:0001085	RNA polymerase II transcription factor binding	15/2323	43/12127	0.0109842	0.0372082	0.0250617	bi/emc/tna/Gug/bin3/lilli/Mad/Trf2/shn/tup/Taf4/mid/sd/Ptx1/e(y)2	15		Male.marker.genes	GO:0051247	positive regulation of protein metabolic process	109/2449	286/12275	5.48953e-13	8.33831e-12	4.12399e-12	DENR/MCTS1/Hsp67Bc/hbs/Su(var)205/Pabp2/CSN5/7B2/Actbeta/Dap160/DopEcR/CG4612/smt3/Diap1/Alg-2/Rheb/CG14184/eIF4A/msn/Pka-C1/RpS9/Src64B/CG4238/Socs36E/hid/orb/bol/Lk6/mbc/eEF5/Alk/phyl/Hrb98DE/jeb/orb2/Hrb27C/Su(z)2/vn/Pde8/Rac1/sNPF/Ret/pum/eIF3m/Ncoa6/spg/Apc/rdx/CG33144/Oamb/G9a/Src42A/yki/Atg17/Smurf/sNPF-R/Mdh2/bnl/P32/rpr/mav/Stlk/hep/Roc1a/ctrip/Rpb7/Mnn1/slim/Nedd4/hppy/CG31855/Oda/stv/p…	109		Male.marker.genes	GO:0070938	contractile ring	9/2364	19/11938	0.00617785	0.0164526	0.00855658	sqh/zip/Spn/msn/shrb/Abl/Sep1/Arpc2/pnut	9
Male.marker.genes	GO:0017022	myosin binding	15/2323	43/12127	0.0109842	0.0372082	0.0250617	Hsp26/sqh/Cam/zip/aPKC/crp/Socs16D/Tomosyn/RpL23/CLIP-190/alphaTub84D/Nedd4/Mlc-c/shg/RpL34a	15		Male.marker.genes	GO:0001736	establishment of planar polarity	55/2449	108/12275	5.69323e-13	8.55764e-12	4.23247e-12	Wnt4/tsr/app/hbs/Akap200/sqh/CadN/zip/fred/rin/CadN2/ed/Galphao/Frl/stan/hwt/msn/S/puc/lola/kug/Rala/spen/nmo/otk/sty/kay/Rac1/otk2/rdx/gish/sca/caup/ara/nej/sano/fz/hep/fwd/Dl/tow/btsz/scrib/dco/mirr/aop/cno/shg/Rho1/baz/bsk/pnt/Vang/msk/spi	55		Male.marker.genes	GO:0005881	cytoplasmic microtubule	12/2364	29/11938	0.00632995	0.0167478	0.00871009	alphaTub84B/shot/Lis-1/Dhc64C/pigs/klar/tau/Apc/pod1/tacc/Khc-73/Tctp	12
Male.marker.genes	GO:0001227	DNA-binding transcription repressor activity, RNA polymerase II-specific	21/2323	67/12127	0.0115289	0.0388501	0.0261676	tsh/dsx/Blimp-1/pros/CG43689/CG9932/CG12605/chn/cic/Mad/CG43347/mid/CG32767/Pur-alpha/Gsc/aop/CG12071/en/CG18599/klu/CG4360	21		Male.marker.genes	GO:0007164	establishment of tissue polarity	55/2449	108/12275	5.69323e-13	8.55764e-12	4.23247e-12	Wnt4/tsr/app/hbs/Akap200/sqh/CadN/zip/fred/rin/CadN2/ed/Galphao/Frl/stan/hwt/msn/S/puc/lola/kug/Rala/spen/nmo/otk/sty/kay/Rac1/otk2/rdx/gish/sca/caup/ara/nej/sano/fz/hep/fwd/Dl/tow/btsz/scrib/dco/mirr/aop/cno/shg/Rho1/baz/bsk/pnt/Vang/msk/spi	55		Male.marker.genes	GO:0030863	cortical cytoskeleton	14/2364	36/11938	0.00635488	0.0167478	0.00871009	sqh/Bsg/Ten-a/zip/Rbp/Fife/Rim/brp/Cortactin/Vrp1/Tm1/capt/Arp3/CG6891	14
Male.marker.genes	GO:0004879	nuclear receptor activity	8/2323	18/12127	0.0125273	0.0417793	0.0281406	Hr4/Eip75B/ftz-f1/Hr3/EcR/Hr38/Hr39/gce	8		Male.marker.genes	GO:0051963	regulation of synapse assembly	57/2449	114/12275	5.88986e-13	8.80732e-12	4.35596e-12	nwk/Syp/CaMKII/Cals/Sdc/futsch/Galphao/Fas2/Spn/Syn1/veli/stan/wit/Rheb/Octbeta2R/cac/Src64B/Dad/nmo/Mad/dysc/plum/brat/ena/Octbeta1R/Rac1/Ank2/pum/Liprin-gamma/mnb/Abl/Src42A/simj/kis/trio/Akt1/Fak/slo/Mob2/CASK/dlg1/unc-104/Pak3/stj/Nedd4/metro/Cip4/SkpA/Top3beta/Mob4/Eps-15/Arp3/tkv/dbo/Syn2/alpha-Spec/Synd	57		Male.marker.genes	GO:0016471	vacuolar proton-transporting V-type ATPase complex	8/2364	16/11938	0.00654167	0.016913	0.00879603	Vha26/Vha68-1/Vha13/Vha36-1/Vha14-1/Vha44/Vha55/VhaSFD	8
Male.marker.genes	GO:0098531	transcription factor activity, direct ligand regulated sequence-specific DNA binding	8/2323	18/12127	0.0125273	0.0417793	0.0281406	Hr4/Eip75B/ftz-f1/Hr3/EcR/Hr38/Hr39/gce	8		Male.marker.genes	GO:0008039	synaptic target recognition	33/2449	49/12275	7.4568e-13	1.1093e-11	5.48639e-12	CG5758/Wnt4/nrm/Pvf3/Fas3/hig/Ten-a/tutl/Con/sli/Ten-m/CG8668/Sema1a/Tl/Nrx-IV/fz2/robo3/galectin/beat-IIIc/Drl-2/Fur1/dpr12/Sema2b/NetB/robo2/CG32373/acj6/ab/Sulf1/Ptp69D/tey/Npc2a/Sema2a	33		Male.marker.genes	GO:0030118	clathrin coat	8/2364	16/11938	0.00654167	0.016913	0.00879603	Chc/VAChT/lqf/AP-1sigma/AP-2sigma/CG9132/Afti/AP-2mu	8
Male.marker.genes	GO:0004721	phosphoprotein phosphatase activity	28/2323	97/12127	0.0132339	0.0439093	0.0295753	Ptp99A/Lar/IA-2/janA/Pp1-87B/puc/Mkp3/flw/Ptp10D/cdc14/CG5830/PRL-1/CG3530/Sur-8/csw/Ptpmeg/CanA-14F/rdgC/Ptpmeg2/Pp2A-29B/Ptp69D/Pp2B-14D/CG7115/ttm50/CG11597/CG12091/Ptp4E/CG10417	28		Male.marker.genes	GO:1903530	regulation of secretion by cell	45/2449	80/12275	7.52365e-13	1.1135e-11	5.50719e-12	cpx/nemy/Rab3/tsr/CG9650/sky/Frq2/RabX4/CaMKII/wls/rho-5/Glut1/Tomosyn/GABA-B-R2/cmpy/Snx3/Ih/Syx1A/Dys/cac/S/AdipoR/Fife/Exn/Syt12/Sytbeta/NFAT/Syt4/Flo2/Cadps/CG15537/Akt1/corn/Rab26/CASK/unc-104/BicD/Syt1/Syt7/Rab27/dco/InR/Frq1/twit/Rab1	45		Male.marker.genes	GO:0014069	postsynaptic density	7/2364	13/11938	0.00658471	0.016913	0.00879603	Spn/nAChRalpha7/Prosap/dlg1/scrib/shi/hts	7
Male.marker.genes	GO:0004725	protein tyrosine phosphatase activity	14/2323	40/12127	0.0133544	0.044083	0.0296923	Ptp99A/Lar/IA-2/puc/Ptp10D/cdc14/PRL-1/CG3530/csw/Ptpmeg/Ptpmeg2/Ptp69D/ttm50/Ptp4E	14		Male.marker.genes	GO:0051046	regulation of secretion	46/2449	83/12275	8.6706e-13	1.2767e-11	6.31436e-12	cpx/nemy/Rab3/tsr/CG9650/sky/Frq2/RabX4/CaMKII/wls/IA-2/rho-5/Glut1/Tomosyn/GABA-B-R2/cmpy/Snx3/Ih/Syx1A/Dys/cac/S/AdipoR/Fife/Exn/Syt12/Sytbeta/NFAT/Syt4/Flo2/Cadps/CG15537/Akt1/corn/Rab26/CASK/unc-104/BicD/Syt1/Syt7/Rab27/dco/InR/Frq1/twit/Rab1	46		Male.marker.genes	GO:0032279	asymmetric synapse	7/2364	13/11938	0.00658471	0.016913	0.00879603	Spn/nAChRalpha7/Prosap/dlg1/scrib/shi/hts	7
Female.marker.genes	GO:0003700	DNA-binding transcription factor activity	151/2020	462/12127	5.30571e-18	2.97593e-15	2.03153e-15	Blimp-1/hth/tsh/Lim1/ham/fru/ap/Vsx1/ftz-f1/scro/toy/Hr4/Xbp1/bi/Hr38/kay/CG9650/NK7.1/luna/CG12605/Trf2/sd/Atf3/CG32767/CG43347/shn/SoxN/Vsx2/CG9932/cic/pan/trx/lola/cg/Octbeta2R/REPTOR/Eip74EF/Hr3/Smox/Eip75B/Mad/ab/Mef2/ey/Hr51/Dif/danr/bun/NFAT/FoxP/chn/sima/akirin/Pur-alpha/da/NfI/Antp/grn/pros/vvl/emc/E2f1/CG43689/dmrt99B/CG16779/lilli/Dad/Sox21b/D/bab1/bab2/Eip78C/EcR/pdm3/TfAP-2/dan/nvy/a…	151		Male.marker.genes	GO:1902531	regulation of intracellular signal transduction	128/2449	357/12275	9.24561e-13	1.35446e-11	6.69893e-12	Imp/14-3-3zeta/chrb/14-3-3epsilon/CG43658/RapGAP1/PIP4K/Efa6/Actbeta/Socs16D/Cdep/GEFmeso/ed/DopEcR/smt3/Pp1-87B/Alg-2/Rheb/CG14184/asrij/msn/dnc/crb/puc/Src64B/LRR/Socs36E/Exn/Mkp3/flw/Rala/mbc/rad/Alk/CG42684/siz/sty/jeb/Sik3/Gprk2/Pdk1/Ziz/vn/Nplp1/Epac/Pde8/Rac1/sNPF/Ret/mnb/CycG/spg/Csk/Sesn/CG42674/rdx/spri/Hipk/Src42A/PVRAP/ATPsynD/Atg1/trio/Akt1/Smurf/CG4629/sNPF-R/bnl/P32/mav/sif/scyl/E(…	128		Male.marker.genes	GO:0098984	neuron to neuron synapse	7/2364	13/11938	0.00658471	0.016913	0.00879603	Spn/nAChRalpha7/Prosap/dlg1/scrib/shi/hts	7
Female.marker.genes	GO:0004930	G protein-coupled receptor activity	60/2020	118/12127	9.25638e-18	2.97593e-15	2.03153e-15	SIFaR/mGluR/CG33639/5-HT1A/Oct-TyrR/AstC-R1/stan/CCKLR-17D3/GABA-B-R3/AstA-R1/CG12290/AstC-R2/Dh44-R1/mAChR-A/TyrR/TkR86C/CG44153/rk/CG13579/Octbeta3R/Octbeta2R/Dop1R1/Octbeta1R/Dop1R2/Dop2R/DopEcR/SPR/Oamb/smog/GABA-B-R1/CG43795/TrissinR/mtt/FMRFaR/cry/sNPF-R/CG13229/CNMaR/5-HT7/AdoR/Rh7/NPFR/CG31760/CCAP-R/5-HT2B/5-HT2A/5-HT1B/CG13995/mAChR-B/Dh31-R/Pdfr/CG32547/Cirl/RYa-R/Dh44-R2/CCHa1-R/CCKLR…	60		Male.marker.genes	GO:0007274	neuromuscular synaptic transmission	44/2449	78/12275	1.1825e-12	1.72359e-11	8.52457e-12	cpx/nwk/Syp/sky/Nrx-1/Ten-a/Ten-m/Rbp/Tomosyn/SERCA/Smn/wit/Syx1A/Dys/Nlg2/Rim/Alk/jeb/dysc/Neto/Galphaq/VGlut/Pka-R1/Ank2/Plc21C/brp/Snap25/ChAT/P32/slo/wrd/CASK/Slob/Blos1/Syt1/stj/cv-c/rut/dj-1beta/alphaSnap/apt/tkv/twf/alpha-Spec	44		Male.marker.genes	GO:0090575	RNA polymerase II transcription factor complex	30/2364	98/11938	0.00699595	0.0178785	0.00929818	hth/abd-A/Eip75B/MED7/mam/Smn/Taf11/pan/ftz-f1/Mad/Smox/EcR/Trf2/TfIIA-S/Taf12/skd/sima/MED26/ear/Taf4/lgs/Bgb/bip2/arm/Max/exd/Taf10b/Hr39/MED4/E2f1	30
Female.marker.genes	GO:0003735	structural constituent of ribosome	98/2020	271/12127	3.61008e-15	5.89465e-13	4.02401e-13	tko/RpLP0/RpL12/RpS6/RpL15/RpL36/RpS13/mRpL28/RpL23/RpS3A/sta/mRpS10/mRpS7/mRpL14/mRpL15/RpL26/RpL28/RpL41/RpS25/RpS27/RpS20/RpL27A/RpL32/RpS9/RpL23A/RpL8/RpL37A/RpL24-like/RpL5/RpS15Aa/RpL19/RpLP2/mRpS22/mRpL27/mRpL24/mRpL47/mRpL52/mRpL2/mRpL12/mRpS24/mRpS6/RpL40/RpS7/mRpS2/RpL35/mRpS33/RpS2/RpL38/RpL18A/mRpL21/mRpS21/mRpL19/bonsai/mRpL41/mRpL13/mRpL1/RpL34a/RpL36A/RpS23/mRpL37/mRpL17/mRpS30/RpS…	98		Male.marker.genes	GO:0006468	protein phosphorylation	146/2449	427/12275	1.61499e-12	2.33979e-11	1.15722e-11	Btk29A/Hsp67Bc/chinmo/put/bma/CkIIalpha/Tlk/CaMKI/CaMKII/Cam/Actbeta/aPKC/svr/Dap160/DopEcR/drl/Nrk/awd/smt3/smal/cdi/Alg-2/PKD/wit/CG14184/msn/Pka-C1/Eip63E/puc/Src64B/Dad/Socs36E/Mkp3/flw/Lk6/Rala/Drak/mbc/Drl-2/nmo/kek1/Alk/Gprk1/JIL-1/otk/sty/jeb/Sik3/kay/Dyrk2/Gprk2/Pdk1/vn/Pde8/Pkc53E/CG8726/Rac1/Pka-R1/sNPF/Ret/mnb/CycG/spg/Csk/sff/Abl/rdx/Ddr/PDZ-GEF/Hipk/gish/Src42A/grp/ATPsynD/Atg1/Strn…	146		Male.marker.genes	GO:0032155	cell division site part	16/2364	44/11938	0.00776423	0.0197422	0.0102674	Arl4/Rab11/sqh/zip/Tl/cindr/nuf/Moe/Lrch/Cip4/pnut/Amph/CG15602/Rab1/Arf51F/Synd	16
Female.marker.genes	GO:0000981	DNA-binding transcription factor activity, RNA polymerase II-specific	100/2020	279/12127	3.66697e-15	5.89465e-13	4.02401e-13	Blimp-1/hth/tsh/Lim1/ap/ftz-f1/toy/Hr4/Xbp1/bi/Hr38/kay/luna/CG12605/sd/CG32767/CG43347/shn/SoxN/CG9932/cic/pan/Eip74EF/Hr3/Eip75B/Mad/Mef2/ey/Dif/chn/sima/akirin/Pur-alpha/da/NfI/Antp/grn/pros/vvl/E2f1/CG43689/dmrt99B/Sox21b/D/EcR/TfAP-2/fkh/sim/rn/Sidpn/gce/PHDP/Awh/hb/Lim3/Pdp1/vg/CG18599/Optix/Rx/kn/CG32532/Ets65A/caup/ara/zfh1/mirr/aop/Stat92E/Drgx/tup/cbt/pnt/Ets96B/fd102C/Sp1/svp/btd/oc/Lm…	100		Male.marker.genes	GO:0045597	positive regulation of cell differentiation	71/2449	160/12275	1.62148e-12	2.33979e-11	1.15722e-11	Imp/bru1/CG10257/ctp/PlexA/Actbeta/pros/zip/aPKC/shot/Dap160/Pdcd4/Lis-1/Sar1/Dhc64C/Diap1/stan/Rheb/nudC/Prosap/kuz/puc/tai/Src64B/mbc/Smox/EcR/kay/Hrb27C/DAAM/vn/Rac1/mnb/spg/spri/G9a/Src42A/yki/Rop/Atg1/kis/bun/Akt1/Dab/chic/fz/hep/PlexB/Roc1a/da/Nedd4/RasGAP1/Hr51/Rab35/pyr/InR/stck/oc/aop/shg/Pvr/Myc/Mlf/bsk/pnt/Vang/klu/spi/twf/Rab1/E2f1	71		Male.marker.genes	GO:0045172	germline ring canal	10/2364	23/11938	0.00826297	0.0209053	0.0108723	Btk29A/14-3-3zeta/sosie/14-3-3epsilon/sqh/Src64B/chb/Lpin/hts/dock	10
Female.marker.genes	GO:0060089	molecular transducer activity	137/2020	438/12127	1.08129e-14	1.39053e-12	9.49255e-13	SIFaR/Nmdar2/mGluR/nAChRalpha6/CG33639/5-HT1A/fz2/nAChRalpha5/Lar/Oct-TyrR/GluClalpha/drl/ftz-f1/GluRIB/AstC-R1/GluRIA/stan/Nlg3/Ptp10D/Hr4/CCKLR-17D3/pHCl-1/18w/wit/GABA-B-R3/Ptp99A/Hr38/klg/SK/Rdl/Toll-6/AstA-R1/nAChRalpha1/Nlg2/CG12290/AstC-R2/Dh44-R1/mAChR-A/TyrR/fra/put/TkR86C/CG44153/rk/Gfrl/CG13579/Octbeta3R/shakB/Octbeta2R/kek6/Dscam1/Hr3/otk/Eip75B/Pka-C3/Pka-C1/Dop1R1/Octbeta1R/Dop1R2/H…	137		Male.marker.genes	GO:0097435	supramolecular fiber organization	95/2449	241/12275	1.77668e-12	2.55099e-11	1.26168e-11	Btk29A/Msp300/nwk/tsr/chinmo/bru1/CG43658/cib/Arpc5/SelR/Bsg/ctp/futsch/zip/shot/svr/Ten-m/mask/Dg/ed/Dhc64C/stai/Spn/Jupiter/ringer/Arpc4/cdi/Arpc3A/Smn/Arpc1/IRSp53/Src64B/cindr/CanB2/ena/spir/jvl/DAAM/sick/Rac1/C3G/Pka-R1/rhea/Ret/Apc/Abl/pod1/Cortactin/gish/Moe/Vrp1/chb/Src42A/Tm1/mew/pico/tacc/Kank/chic/Plod/fz/RhoBTB/PsGEF/hep/Pak3/Mical/sn/Nedd4/Dl/btsz/shi/Cip4/dco/capt/sals/gammaTub23C/A…	95		Male.marker.genes	GO:0005774	vacuolar membrane	20/2364	60/11938	0.00940042	0.0236647	0.0123074	gammaSnap1/CG32225/Vha26/Vha68-1/Lamp1/CG1275/Atg8a/comm/Vha13/Vha36-1/Vha14-1/Vha44/Vha55/VhaSFD/alphaSnap/LTV1/gammaSnap2/CG6707/Rab7/MRP	20
Female.marker.genes	GO:0008324	cation transmembrane transporter activity	117/2020	355/12127	1.77773e-14	1.90514e-12	1.30055e-12	nrv3/GC1/CG10804/cype/blw/ATPsynCF6/VGAT/fwe/sun/COX5A/COX5B/Atpalpha/kcc/COX8/COX7C/Nmdar2/ND-MLRQ/ATPsynB/COX4/Vha26/COX6B/ATPsyndelta/Vha55/Vha44/ATPsynE/SPoCk/levy/Calx/ATPsyngamma/ATPsynbeta/nAChRalpha6/nAChRalpha5/CG42340/nrv2/GluRIB/COX7A/GluRIA/Shawl/Ca-alpha1T/eag/CG42594/SK/para/Sh/Mid1/nAChRalpha1/CG1688/VhaAC45/Shaw/KCNQ/CG33181/CG43066/Cngl/SLO2/prt/Elk/CG42260/Vha16-1/slo/rdgB/nAChR…	117		Male.marker.genes	GO:0035282	segmentation	100/2449	259/12275	2.03326e-12	2.90494e-11	1.43674e-11	hth/Ubx/Abd-B/tsh/Antp/tsr/Bx/ap/Rab11/tsu/CSN5/rump/Hsp83/wls/aPKC/Cow/Chc/nkd/enc/Dg/Hs3st-B/fz2/mago/SmD3/lost/dlp/stan/SoxN/Syx1A/klar/Pka-C1/pan/Gug/lilli/arr/D/orb/tud/fs(1)h/Dsp1/spen/dally/AGO1/cic/Mad/Hrb27C/brat/jing/spir/pum/sfl/sqd/Apc/rdx/Moe/TfAP-2/dan/danr/Tm1/vvl/Rop/kis/skd/osa/glo/lgs/drm/odd/chic/hb/fz/Rab6/dlg1/Stat92E/Syt1/csw/RasGAP1/Acsl/cnc/arm/psq/Dl/scrib/bic/cni/run/oc/…	100		Male.marker.genes	GO:0005769	early endosome	21/2364	64/11938	0.00961285	0.0240797	0.0125233	PIP4K/wls/ed/Tl/fz2/CG15168/Snx3/wit/asrij/arr/Klp98A/Rab14/Khc-73/Dl/Rab21/Vha55/TM9SF4/tkv/Arf51F/Syx7/lqfR	21
Female.marker.genes	GO:0038023	signaling receptor activity	130/2020	412/12127	2.56481e-14	2.35596e-12	1.60831e-12	SIFaR/Nmdar2/mGluR/nAChRalpha6/CG33639/5-HT1A/fz2/nAChRalpha5/Lar/Oct-TyrR/GluClalpha/drl/ftz-f1/GluRIB/AstC-R1/GluRIA/stan/Nlg3/Ptp10D/Hr4/CCKLR-17D3/pHCl-1/18w/wit/GABA-B-R3/Ptp99A/Hr38/klg/SK/Rdl/Toll-6/AstA-R1/nAChRalpha1/Nlg2/CG12290/AstC-R2/Dh44-R1/mAChR-A/TyrR/fra/put/TkR86C/CG44153/rk/Gfrl/CG13579/Octbeta3R/shakB/Octbeta2R/kek6/Dscam1/Hr3/otk/Eip75B/Dop1R1/Octbeta1R/Dop1R2/Hr51/CG10738/To…	130		Male.marker.genes	GO:0198738	cell-cell signaling by wnt	61/2449	129/12275	2.09852e-12	2.98342e-11	1.47555e-11	tsh/Wnt4/Mmp2/wls/bai/Cow/eca/Bili/nkd/p24-1/CHOp24/drl/Galphao/fz2/Diap1/Pp1-87B/Snx3/dlp/SoxN/Prosap/pan/arr/flw/Drl-2/spen/nmo/dally/crol/ttv/otk/phyl/Dyrk2/sfl/Apc/Flo2/Hipk/gish/Ssdp/skd/nej/osa/gro/lgs/fz/Roc1a/CtBP/arm/wts/dco/Sin3A/Sulf1/SkpA/aop/Rho1/Wnt10/CG17278/Axn/CkIalpha/apolpp/Sec22/TER94	61		Male.marker.genes	GO:0000791	euchromatin	11/2364	27/11938	0.0101	0.0251754	0.0130931	Su(var)205/Mtor/HP1c/Sirt1/Parp/G9a/Top1/Nup153/Sin3A/akirin/Set1	11
Female.marker.genes	GO:0022890	inorganic cation transmembrane transporter activity	111/2020	339/12127	1.39741e-13	1.12317e-11	7.66736e-12	nrv3/GC1/CG10804/cype/blw/ATPsynCF6/VGAT/fwe/sun/COX5A/COX5B/Atpalpha/kcc/COX8/COX7C/Nmdar2/ND-MLRQ/ATPsynB/COX4/Vha26/COX6B/ATPsyndelta/Vha55/Vha44/ATPsynE/SPoCk/levy/Calx/ATPsyngamma/ATPsynbeta/nAChRalpha6/nAChRalpha5/CG42340/nrv2/GluRIB/COX7A/GluRIA/Shawl/Ca-alpha1T/eag/CG42594/SK/para/Sh/Mid1/nAChRalpha1/CG1688/VhaAC45/Shaw/KCNQ/CG43066/Cngl/SLO2/prt/Elk/CG42260/Vha16-1/slo/rdgB/nAChRbeta1/PM…	111		Male.marker.genes	GO:0007431	salivary gland development	60/2449	126/12275	2.18062e-12	3.06988e-11	1.51831e-11	Btk29A/Idh3b/hth/Abd-B/tsh/Wnt4/hdc/trn/put/BI-1/caps/Cam/ctp/zip/fra/drpr/sli/robo1/drl/fz2/br/crb/pan/kug/Src64B/rho/hid/Drl-2/Eip74EF/lolal/Mad/EcR/jeb/Trf2/Rac1/NetB/shn/Src42A/robo2/mew/Atg17/chic/Mdh2/hb/rpr/fz/Utx/Dif/btsz/shi/exd/raw/fkh/shg/Pvr/CrebA/Rho1/tkv/trh/IP3K2	60		Male.marker.genes	GO:0070603	SWI/SNF superfamily-type complex	18/2364	53/11938	0.0108609	0.0268928	0.0139863	Nurf-38/Act42A/tou/Act5C/simj/osa/CG8677/MBD-like/E(bx)/CtBP/Mi-2/pho/inv/en/Bap55/MTA1-like/Bap111/Arp6	18
Female.marker.genes	GO:0005509	calcium ion binding	76/2020	200/12127	2.51985e-13	1.80029e-11	1.22898e-11	Cbp53E/Lrp4/Sytbeta/Calx/Scp2/CadN/CG32373/SP2353/Calr/CanB2/stan/alpha-Man-Ia/CG11638/Nca/NUCB1/Plc21C/CadN2/eys/para/Frq2/Frq1/wry/Syt1/Dgk/CG5890/Nrg/Eip63F-1/Cow/tok/LRP1/Dg/CG44422/CanB/CG7646/norpA/rdgC/Dl/CG17272/Swip-1/mgl/CG17765/LpR1/CG31650/Scgalpha/kug/sli/Cnx99A/Cals/crb/RyR/Cam/CG31475/Syt12/Ret/sqh/Alg-2/tld/LpR2/cac/Cad87A/Tctp/CG31345/Duox/Syt7/alpha-Spec/Fkbp14/Cadps/shot/elm/un…	76		Male.marker.genes	GO:0035272	exocrine system development	60/2449	126/12275	2.18062e-12	3.06988e-11	1.51831e-11	Btk29A/Idh3b/hth/Abd-B/tsh/Wnt4/hdc/trn/put/BI-1/caps/Cam/ctp/zip/fra/drpr/sli/robo1/drl/fz2/br/crb/pan/kug/Src64B/rho/hid/Drl-2/Eip74EF/lolal/Mad/EcR/jeb/Trf2/Rac1/NetB/shn/Src42A/robo2/mew/Atg17/chic/Mdh2/hb/rpr/fz/Utx/Dif/btsz/shi/exd/raw/fkh/shg/Pvr/CrebA/Rho1/tkv/trh/IP3K2	60		Male.marker.genes	GO:0035003	subapical complex	7/2364	14/11938	0.0109414	0.0268928	0.0139863	aPKC/sdt/veli/crb/Moe/Dl/baz	7
Female.marker.genes	GO:0001653	peptide receptor activity	31/2020	52/12127	3.0802e-12	1.98057e-10	1.35205e-10	SIFaR/CG33639/AstC-R1/CCKLR-17D3/AstA-R1/AstC-R2/Dh44-R1/TkR86C/rk/CG10738/SPR/CG34357/TrissinR/FMRFaR/sNPF-R/CG13229/CNMaR/NPFR/CCAP-R/CG31183/CG13995/Dh31-R/Pdfr/CG32547/RYa-R/Dh44-R2/CCHa1-R/CCKLR-17D1/TkR99D/CrzR/CCHa2-R	31		Male.marker.genes	GO:0007015	actin filament organization	67/2449	148/12275	2.22179e-12	3.11267e-11	1.53947e-11	Btk29A/Msp300/nwk/tsr/chinmo/CG43658/cib/Arpc5/SelR/ctp/svr/ed/Spn/Arpc4/cdi/Arpc3A/Smn/Arpc1/IRSp53/Src64B/cindr/ena/spir/jvl/DAAM/sick/Rac1/Pka-R1/Ret/Abl/pod1/Cortactin/gish/Vrp1/Src42A/Tm1/mew/pico/Kank/chic/fz/RhoBTB/PsGEF/hep/Pak3/Mical/sn/Dl/btsz/shi/Cip4/dco/capt/sals/Arpc2/Rho1/Arp3/capu/tmod/sced/hts/up/Rack1/CG1674/twf/Lam/CG6891	67		Male.marker.genes	GO:0005689	U12-type spliceosomal complex	6/2364	11/11938	0.0110548	0.0268928	0.0139863	SmD3/Sf3b6/SmD1/Sf3b2/SNRPG/Phf5a	6
Female.marker.genes	GO:0008528	G protein-coupled peptide receptor activity	28/2020	46/12127	1.71958e-11	1.00517e-09	6.86185e-10	SIFaR/CG33639/AstC-R1/CCKLR-17D3/AstA-R1/AstC-R2/Dh44-R1/TkR86C/rk/SPR/TrissinR/FMRFaR/sNPF-R/CG13229/CNMaR/NPFR/CCAP-R/CG13995/Dh31-R/Pdfr/CG32547/RYa-R/Dh44-R2/CCHa1-R/CCKLR-17D1/TkR99D/CrzR/CCHa2-R	28		Male.marker.genes	GO:0030534	adult behavior	73/2449	168/12275	2.78937e-12	3.88895e-11	1.92341e-11	Bacc/klg/Akap200/Atpalpha/shakB/tutl/shep/FMRFaR/twz/DopEcR/SERCA/dpr9/Fas2/Tbh/Galphas/Pp1-87B/dnc/nAChRalpha7/Pka-C1/Nlg2/norpA/cac/S/eag/Tk/rho/Sirt1/CCKLR-17D3/Galphaq/sNPF/sm/pum/Plc21C/brp/Trpgamma/mtt/Vrp1/TfAP-2/dati/pxb/Syn/kra/acj6/Sh/Cirl/tay/CASK/dlg1/Adar/hppy/sim/ey/Pka-R2/rut/dco/dj-1beta/Cdk5alpha/oc/rogdi/beta4GalNAcTA/Ms/ben/Nmdar1/apt/hang/ple/Sema2a/CrzR/na/Marf/spi/Lam/Arf51F	73		Male.marker.genes	GO:0045334	clathrin-coated endocytic vesicle	6/2364	11/11938	0.0110548	0.0268928	0.0139863	Chc/VAChT/BicD/lqf/AP-2sigma/AP-2mu	6
Female.marker.genes	GO:0008188	neuropeptide receptor activity	27/2020	44/12127	3.0304e-11	1.60062e-09	1.09267e-09	SIFaR/CG33639/AstC-R1/CCKLR-17D3/AstA-R1/AstC-R2/Dh44-R1/TkR86C/rk/TrissinR/FMRFaR/sNPF-R/CG13229/CNMaR/NPFR/CCAP-R/CG13995/Dh31-R/Pdfr/CG32547/RYa-R/Dh44-R2/CCHa1-R/CCKLR-17D1/TkR99D/CrzR/CCHa2-R	27		Male.marker.genes	GO:0010720	positive regulation of cell development	68/2449	152/12275	3.01528e-12	4.1837e-11	2.06919e-11	Imp/CG10257/ctp/PlexA/Actbeta/pros/zip/aPKC/shot/Dap160/Lis-1/Sar1/Dhc64C/Diap1/stan/Rheb/nudC/Prosap/kuz/puc/tai/Src64B/mbc/Smox/EcR/kay/Hrb27C/DAAM/vn/Rac1/mnb/spg/spri/G9a/Src42A/yki/Rop/Atg1/kis/bun/Akt1/Dab/chic/fz/hep/PlexB/Roc1a/da/Nedd4/RasGAP1/Hr51/Rab35/pyr/InR/stck/oc/aop/shg/Pvr/Myc/bsk/pnt/Vang/klu/spi/twf/Rab1/E2f1	68		Male.marker.genes	GO:0046658	anchored component of plasma membrane	6/2364	11/11938	0.0110548	0.0268928	0.0139863	bou/dlp/Gfrl/dally/gish/twit	6
Female.marker.genes	GO:0008227	G protein-coupled amine receptor activity	18/2020	22/12127	3.38655e-11	1.60062e-09	1.09267e-09	5-HT1A/Oct-TyrR/CG12290/mAChR-A/TyrR/Octbeta3R/Octbeta2R/Dop1R1/Octbeta1R/Dop1R2/Dop2R/DopEcR/Oamb/5-HT7/5-HT2B/5-HT2A/5-HT1B/mAChR-B	18		Male.marker.genes	GO:0030855	epithelial cell differentiation	147/2449	434/12275	3.08017e-12	4.25329e-11	2.10361e-11	Abd-B/tsh/tsr/app/ct/sosie/Syp/hbs/pasi2/Fas3/pasi1/Lar/Hsc70-4/emc/Rab11/sqh/Fs(2)Ket/Prosalpha7/zip/aPKC/rin/Lis-1/ed/Galphao/Dhc64C/SERCA/stai/smt3/pigs/mam/veli/r2d2/Diap1/mats/br/Mbs/S/crb/kuz/puc/numb/kug/tai/Src64B/Socs36E/cindr/bib/orb/Rala/mbc/spen/Smr/Evi5/toc/phyl/cic/sty/Mad/yrt/EcR/kay/Gprk2/Hrb27C/Parp/ena/jing/spir/jvl/vn/Rac1/rhea/sqd/Apc/Abl/spri/Cortactin/18w/Mef2/yki/Rop/kis/ne…	147		Male.marker.genes	GO:0005770	late endosome	23/2364	73/11938	0.0117629	0.0284785	0.014811	CG32225/Vps24/wls/aph-1/Lamp1/fz2/CG14184/S/arr/rho/shrb/CG1275/Chmp1/yki/Rab14/comm/pen-2/Vta1/LTV1/tkv/CG14812/CG6707/Rab7	23
Female.marker.genes	GO:0001012	RNA polymerase II regulatory region DNA binding	87/2020	263/12127	3.48501e-11	1.60062e-09	1.09267e-09	Blimp-1/salr/zfh2/Lim1/ap/scro/ct/toy/Hr4/Xbp1/bi/Hr38/kay/NK7.1/CG12605/Trf2/sd/Atf3/CG32767/CG9932/cic/pan/Smr/Hr3/Eip75B/Mad/Mef2/ey/Hr51/Dif/NFAT/CG10543/Pur-alpha/da/Antp/grn/vvl/br/E2f1/CG43689/disco/dmrt99B/EcR/TfAP-2/CrebA/dve/fkh/Ptx1/sim/rn/Sidpn/PHDP/Awh/hb/Lim3/Pdp1/CG18599/Rx/CG32532/zfh1/aop/pho/MESR3/Stat92E/Drgx/tup/Dll/svp/Lmx1a/Hey/CG7368/Abd-B/slou/abd-A/Ubx/CG4328/HLH3B/en/gcm…	87		Male.marker.genes	GO:0043254	regulation of protein complex assembly	56/2449	115/12275	3.76205e-12	5.17013e-11	2.55706e-11	Btk29A/nwk/Ssb-c31a/chinmo/Rpt3/Snoo/SF2/Arpc5/svr/Sar1/Jupiter/ringer/B52/Arpc4/Arpc3A/SC35/x16/Arpc1/Taf11/IRSp53/CG11486/Dad/Dsp1/spir/DAAM/Rbp1/Cortactin/gish/Vrp1/chb/Kank/chic/Rbp1-like/RhoBTB/PsGEF/NC2beta/Rpt6/shi/Cip4/dco/cal1/sals/Arpc2/Rsf1/Arp3/capu/tmod/hts/Rpt4/Rack1/twf/Sgt/Lam/CG6891/mxt/Sec16	56		Male.marker.genes	GO:0005793	endoplasmic reticulum-Golgi intermediate compartment	9/2364	21/11938	0.0134416	0.0323879	0.0168441	NUCB1/bai/eca/p24-1/CHOp24/CG9384/Trs31/ergic53/Sec22	9
Female.marker.genes	GO:0022843	voltage-gated cation channel activity	21/2020	29/12127	4.50042e-11	1.92918e-09	1.31696e-09	Nmdar2/Shawl/Ca-alpha1T/eag/Sh/Shaw/KCNQ/SLO2/Elk/slo/Ca-alpha1D/Ca-beta/Hk/Shab/CG4587/Ih/cac/Nmdar1/Shal/NaCP60E/stj	21		Male.marker.genes	GO:0048663	neuron fate commitment	44/2449	80/12275	3.87375e-12	5.27352e-11	2.6082e-11	hth/klg/emc/noc/elB/pros/rin/mam/cdi/stan/br/S/lola/Src64B/Socs36E/bib/rho/Rala/msi/phyl/kay/spg/Src42A/tup/nej/Dab/dac/mid/fz/csw/da/RasGAP1/ey/Dl/scrib/wts/Dbx/oc/aop/sv/exex/ato/pnt/spi	44		Male.marker.genes	GO:0031902	late endosome membrane	11/2364	28/11938	0.0137162	0.0327377	0.017026	CG32225/Lamp1/CG14184/S/rho/CG1275/comm/LTV1/CG14812/CG6707/Rab7	11
Female.marker.genes	GO:0003954	NADH dehydrogenase activity	26/2020	42/12127	5.31864e-11	2.13743e-09	1.45913e-09	ND-30/ND-MLRQ/ND-B12/ND-51/ND-39/ND-B14.5A/ND-20/ND-B14/ND-B14.5B/ND-B15/ND-PDSW/ND-B16.6/ND-19/ND-ASHI/ND-24/ND-SGDH/ND-23/ND-13B/ND-B18/ND-B22/ND-18/ND-B17.2/ND-42/ND-B17/ND-75/ND-49	26		Male.marker.genes	GO:0006091	generation of precursor metabolites and energy	87/2449	216/12275	3.87383e-12	5.27352e-11	2.6082e-11	ND-SGDH/Idh3b/ND-42/ND-ASHI/ND-B14.5B/ND-15/kdn/Tpi/Pgk/SdhB/SdhC/Cyt-c1/ND-19/UQCR-C2/ND-B12/ND-PDSW/UQCR-C1/ATPsynbeta/COX5A/COX4/UQCR-14/CG14757/Cyt-c-p/PyK/Pglym78/Eno/Gapdh2/Gapdh1/blw/Mdh1/UQCR-Q/cype/COX5B/UQCR-6.4/ND-13A/COX7C/Oscillin/Nc73EF/Invadolysin/Dg/COX7A/EcR/Hex-A/CG7834/GC1/levy/RFeSP/ND-MLRQ/ND-39/ND-B15/CG5214/ATPsynO/ND-B17.2/ND-18/ND-B14/Atg1/Atg17/ND-23/Mdh2/SdhA/ND-75/ND-B…	87		Male.marker.genes	GO:0098858	actin-based cell projection	11/2364	28/11938	0.0137162	0.0327377	0.017026	Nrg/shot/kug/Myo10A/dysc/ena/Vrp1/pico/kra/Rab35/shg	11
Female.marker.genes	GO:0004888	transmembrane signaling receptor activity	106/2020	348/12127	7.24137e-11	2.73894e-09	1.86975e-09	SIFaR/Nmdar2/mGluR/nAChRalpha6/CG33639/5-HT1A/fz2/nAChRalpha5/Lar/Oct-TyrR/GluClalpha/drl/GluRIB/AstC-R1/GluRIA/stan/Ptp10D/CCKLR-17D3/pHCl-1/18w/wit/GABA-B-R3/Ptp99A/klg/Rdl/AstA-R1/nAChRalpha1/CG12290/AstC-R2/Dh44-R1/mAChR-A/TyrR/fra/put/TkR86C/CG44153/rk/CG13579/Octbeta3R/Octbeta2R/Dscam1/otk/Dop1R1/Octbeta1R/Dop1R2/Dop2R/DopEcR/SPR/fz/nAChRbeta1/Oamb/babo/nAChRalpha3/nAChRalpha7/Eph/PlexA/smo…	106		Male.marker.genes	GO:0051961	negative regulation of nervous system development	56/2449	116/12275	5.87518e-12	7.96045e-11	3.93711e-11	Rtca/COX5A/COX4/UQCR-14/nwk/COX7C/hdc/Syp/emc/CadN/pros/ed/Hs3st-B/Sema1a/Galphao/Fas2/Spn/cdi/numb/Src64B/Dad/Socs36E/erm/EcR/plum/brat/ena/CG7834/Octbeta1R/sdk/Liprin-gamma/Abl/Src42A/CG5214/osa/Akt1/Fak/bif/Mob2/MED22/MED10/unc-104/sd/stj/RasGAP1/Dl/wts/Cip4/SkpA/Mob4/Ctr9/aop/MED4/dbo/Sema2a/kibra	56		Male.marker.genes	GO:0010008	endosome membrane	20/2364	62/11938	0.0138227	0.0328371	0.0170777	CG32225/Vps24/wls/Lamp1/CG14184/S/rho/nuf/shrb/CG1275/Chmp1/Vps20/comm/Rab35/Vta1/LTV1/Vsp37A/CG14812/CG6707/Rab7	20
Female.marker.genes	GO:0003729	mRNA binding	71/2020	201/12127	8.19826e-11	2.9286e-09	1.99923e-09	Imp/fne/rin/shep/bru3/Su(var)205/CG34354/Rm62/CG3198/ytr/Rbp9/Syp/Sxl/sm/Hrb27C/cpo/brat/bru1/orb2/elav/msi/HnRNP-K/B52/Sf3b6/Hrb98DE/Caper/pAbp/vig/Pur-alpha/bol/Rbfox1/heph/sqd/nonA/CG9705/eIF4G1/D/SF2/glo/Rsf1/rump/DENR/SC35/x16/U2af50/mRpS7/Ref1/RnpS1/ssx/orb/CG42458/eIF3g1/egl/pum/NAT1/Unr/P32/cyp33/Spt5/CG2931/Rbp1-like/stau/RpL35/CG14414/eIF3b/eIF4H1/mRpL13/CG4612/eRF1/RpS5a/RpL13A	71		Male.marker.genes	GO:1904396	regulation of neuromuscular junction development	55/2449	113/12275	5.99807e-12	8.0738e-11	3.99317e-11	nwk/Syp/put/CaMKII/Sdc/futsch/drpr/DIP-gamma/Galphao/dpr11/Fas2/Syn1/veli/wit/Rheb/Octbeta2R/cac/Src64B/Dad/nmo/Mad/dysc/plum/brat/ena/Octbeta1R/Ank2/pum/Liprin-gamma/mnb/Abl/Src42A/simj/kis/trio/Akt1/Fak/mav/slo/Mob2/CASK/dlg1/unc-104/stj/metro/Cip4/SkpA/Mob4/Eps-15/Arp3/tkv/dbo/Syn2/alpha-Spec/Synd	55		Male.marker.genes	GO:0030135	coated vesicle	21/2364	66/11938	0.0139312	0.0329401	0.0171313	Rab11/bai/eca/Chc/p24-1/CHOp24/Sar1/VAChT/BicD/lqf/AP-1sigma/AP-2sigma/syd/CG5946/CG9132/Afti/ergic53/AP-2mu/Sec22/Sec16/dock	21
Female.marker.genes	GO:0000977	RNA polymerase II regulatory region sequence-specific DNA binding	84/2020	256/12127	1.21238e-10	4.10295e-09	2.8009e-09	Blimp-1/salr/zfh2/Lim1/ap/scro/ct/toy/Hr4/Xbp1/bi/Hr38/kay/NK7.1/CG12605/Trf2/sd/Atf3/CG32767/CG9932/cic/pan/Hr3/Eip75B/Mad/Mef2/ey/Hr51/Dif/NFAT/CG10543/Pur-alpha/da/Antp/grn/vvl/br/CG43689/disco/dmrt99B/EcR/TfAP-2/CrebA/dve/fkh/Ptx1/sim/rn/Sidpn/PHDP/Awh/hb/Lim3/Pdp1/CG18599/Rx/CG32532/zfh1/aop/pho/MESR3/Stat92E/Drgx/tup/Dll/svp/Lmx1a/Hey/CG7368/Abd-B/slou/abd-A/Ubx/CG4328/HLH3B/en/gcm/drm/odd/…	84		Male.marker.genes	GO:0032970	regulation of actin filament-based process	51/2449	101/12275	6.01478e-12	8.0738e-11	3.99317e-11	Btk29A/nwk/chinmo/CG43658/p120ctn/Akap200/sqh/Arpc5/svr/Gbeta13F/ed/Arpc4/Arpc3A/Arpc1/IRSp53/Pka-C1/Src64B/flw/ena/spir/DAAM/Abl/Cortactin/gish/Moe/Vrp1/mthl1/Kank/chic/fz/RhoBTB/PsGEF/hep/Nedd4/smog/shi/Cip4/Rab35/dco/sals/Arpc2/Rho1/Arp3/capu/tmod/hts/Rack1/CG1674/twf/Lam/CG6891	51		Male.marker.genes	GO:0044798	nuclear transcription factor complex	34/2364	120/11938	0.0151355	0.0356213	0.0185258	hth/abd-A/Eip75B/MED7/mam/Smn/Taf11/SoxN/pan/ftz-f1/Sox21b/D/Mad/Smox/EcR/Trf2/NFAT/TfIIA-S/Taf12/skd/sima/MED26/ear/Taf4/lgs/Bgb/bip2/arm/Max/exd/Taf10b/Hr39/MED4/E2f1	34
Female.marker.genes	GO:0099528	G protein-coupled neurotransmitter receptor activity	17/2020	21/12127	1.67865e-10	5.39686e-09	3.68419e-09	5-HT1A/Oct-TyrR/GABA-B-R3/mAChR-A/TyrR/Octbeta3R/Octbeta2R/Dop1R1/Octbeta1R/Dop1R2/Oamb/GABA-B-R1/5-HT7/5-HT2B/5-HT2A/5-HT1B/mAChR-B	17		Male.marker.genes	GO:0019637	organophosphate metabolic process	160/2449	488/12275	6.4604e-12	8.63181e-11	4.26915e-11	ND-SGDH/Dak1/ND-42/CG7920/ND-ASHI/ND-B14.5B/ND-15/Tpi/Pgk/SdhB/scu/SdhC/Cyt-c1/ND-19/UQCR-C2/ND-B12/ND-PDSW/UQCR-C1/ATPsynbeta/COX5A/COX4/UQCR-14/CG14757/Cyt-c-p/PyK/sesB/Pglym78/CG6330/Eno/Gapdh2/Gapdh1/blw/Mdh1/UQCR-Q/ATPsynCF6/cype/sun/COX5B/UQCR-6.4/ND-13A/ATPsynB/COX7C/rdgA/TMS1/PIP4K/PlexA/Vha68-1/Pis/Socs16D/PIG-F/Dg/Gycalpha99B/Nos/awd/Pde6/COX7A/CG33977/Scox/PIG-K/norpA/Socs36E/CG5065/CG…	160		Male.marker.genes	GO:0009897	external side of plasma membrane	7/2364	15/11938	0.0170586	0.0399613	0.0207829	Mmp2/Toll-7/Tl/dlp/qvr/Gfrl/dally	7
Female.marker.genes	GO:0008134	transcription factor binding	65/2020	184/12127	5.12759e-10	1.57002e-08	1.07178e-08	hth/ftz-f1/HmgD/tai/bi/Hr38/kay/Sirt1/nej/Trf2/sd/Hipk/shn/HmgZ/HnRNP-K/cic/pan/Dsp1/Eip75B/Mad/14-3-3zeta/cact/NFAT/tna/Ncoa6/Gug/TfIIA-S/da/Rbfox1/emc/E2f1/alien/CG16779/lilli/bin3/D/DOR/Crtc/14-3-3epsilon/Rpt1/Bin1/e(y)2/Rpt6/tou/EcR/Chi/fkh/Ptx1/gce/Bgb/tim/CtBP/tup/arm/bip2/btd/per/Pa1/Taf12/ush/dod/exd/Sgf29/E2f2/Mlf	65		Male.marker.genes	GO:0045333	cellular respiration	61/2449	132/12275	7.24793e-12	9.63941e-11	4.76749e-11	ND-SGDH/Idh3b/ND-42/ND-ASHI/ND-B14.5B/ND-15/kdn/SdhB/SdhC/Cyt-c1/ND-19/UQCR-C2/ND-B12/ND-PDSW/UQCR-C1/COX5A/COX4/UQCR-14/CG14757/Mdh1/UQCR-Q/cype/COX5B/UQCR-6.4/ND-13A/COX7C/Nc73EF/COX7A/EcR/GC1/levy/RFeSP/ND-MLRQ/ND-39/ND-B15/CG5214/ND-B17.2/ND-B14/ND-23/Mdh2/SdhA/ND-75/ND-B18/ND-51/ox/CG7430/ND-24/ND-ACP/ND-20/ND-B16.6/SdhD/ND-13B/ND-49/ND-B22/ND-B14.5A/dj-1beta/Sirup/CG5028/NP15.6/UQCR-11/l(3)…	61		Male.marker.genes	GO:0005771	multivesicular body	6/2364	12/11938	0.0184486	0.0421021	0.0218962	Vps24/wls/shrb/Chmp1/Vta1/tkv	6
Female.marker.genes	GO:0030594	neurotransmitter receptor activity	34/2020	70/12127	5.73505e-10	1.6762e-08	1.14427e-08	Nmdar2/nAChRalpha6/5-HT1A/nAChRalpha5/Oct-TyrR/GluRIB/GluRIA/GABA-B-R3/Rdl/nAChRalpha1/mAChR-A/TyrR/Octbeta3R/Octbeta2R/Dop1R1/Octbeta1R/Dop1R2/Dop2R/DopEcR/nAChRbeta1/Oamb/nAChRalpha3/nAChRalpha7/GABA-B-R1/nAChRalpha2/nAChRbeta2/5-HT7/Nmdar1/5-HT2B/5-HT2A/5-HT1B/mAChR-B/nAChRalpha4/Grd	34		Male.marker.genes	GO:0032270	positive regulation of cellular protein metabolic process	102/2449	271/12275	7.44126e-12	9.85113e-11	4.87221e-11	DENR/MCTS1/Hsp67Bc/hbs/Su(var)205/Pabp2/CSN5/7B2/Actbeta/Dap160/DopEcR/CG4612/smt3/Diap1/Alg-2/Rheb/CG14184/eIF4A/msn/Pka-C1/RpS9/Src64B/Socs36E/hid/orb/bol/Lk6/mbc/eEF5/Alk/phyl/Hrb98DE/jeb/orb2/Hrb27C/Su(z)2/vn/Pde8/Rac1/sNPF/Ret/pum/eIF3m/Ncoa6/spg/rdx/CG33144/Oamb/G9a/Src42A/yki/Atg17/sNPF-R/Mdh2/bnl/P32/rpr/mav/Stlk/hep/Roc1a/Rpb7/Mnn1/slim/hppy/CG31855/stv/pAbp/dco/Cka/InR/eIF2gamma/dod/Skp…	102		Male.marker.genes	GO:0005915	zonula adherens	6/2364	12/11938	0.0184486	0.0421021	0.0218962	ed/yrt/arm/cno/shg/baz	6
Female.marker.genes	GO:0005244	voltage-gated ion channel activity	23/2020	38/12127	1.32393e-09	3.54704e-08	2.4214e-08	porin/Nmdar2/Shawl/Ca-alpha1T/eag/Sh/Shaw/KCNQ/SLO2/Elk/slo/Ca-alpha1D/Ca-beta/Hk/Shab/CG4587/Ih/cac/Nmdar1/GPHR/Shal/NaCP60E/stj	23		Male.marker.genes	GO:0007450	dorsal/ventral pattern formation, imaginal disc	35/2449	57/12275	8.42581e-12	1.10292e-10	5.45485e-11	gammaSnap1/tsh/ap/14-3-3epsilon/nmd/Cow/drpr/Hs3st-B/sbb/dlp/crb/lilli/nuf/CG1943/CG5890/nmo/dally/cic/tara/shn/Mpcp2/skd/osa/sno/Su(Tpl)/CG14073/H/Dl/Sulf1/cbt/capt/vg/pnt/Axn/Rab7	35		Male.marker.genes	GO:0019773	proteasome core complex, alpha-subunit complex	6/2364	12/11938	0.0184486	0.0421021	0.0218962	Prosalpha6/Prosalpha7/Prosalpha2/Prosalpha5/Prosalpha3/Prosalpha4	6
Female.marker.genes	GO:0022832	voltage-gated channel activity	23/2020	38/12127	1.32393e-09	3.54704e-08	2.4214e-08	porin/Nmdar2/Shawl/Ca-alpha1T/eag/Sh/Shaw/KCNQ/SLO2/Elk/slo/Ca-alpha1D/Ca-beta/Hk/Shab/CG4587/Ih/cac/Nmdar1/GPHR/Shal/NaCP60E/stj	23		Male.marker.genes	GO:1990138	neuron projection extension	35/2449	57/12275	8.42581e-12	1.10292e-10	5.45485e-11	path/hdc/Lar/CadN/Nrg/shot/CadN2/Sema1a/Frl/fz2/stan/dnc/Mbs/kuz/tai/Dscam1/DAAM/Rac1/Ank2/spri/RhoGAP100F/trio/bif/chic/fz/Sh/hep/Ptpmeg/Hr51/rut/Liprin-alpha/bsk/Vang/Sema2a/CG15019	35		Male.marker.genes	GO:0045121	membrane raft	6/2364	12/11938	0.0184486	0.0421021	0.0218962	mGluR/Flo1/CG14184/Flo2/hts/CG14812	6
Female.marker.genes	GO:0005261	cation channel activity	56/2020	153/12127	1.81143e-09	4.65899e-08	3.18049e-08	fwe/Nmdar2/nAChRalpha6/nAChRalpha5/CG42340/GluRIB/GluRIA/Shawl/Ca-alpha1T/eag/CG42594/SK/para/Sh/Mid1/nAChRalpha1/CG1688/Shaw/KCNQ/Cngl/SLO2/Elk/CG42260/slo/nAChRbeta1/Trpm/Ca-alpha1D/Ca-beta/Hk/Shab/nAChRalpha3/nAChRalpha7/CG4587/Ih/Nckx30C/tipE/RyR/jp/Task6/nAChRalpha2/nAChRbeta2/cac/Nmdar1/Trpgamma/bib/unc80/nAChRalpha4/CG15270/Shal/MCU/NaCP60E/olf186-F/CG1090/stj/CG43155/Grd	56		Male.marker.genes	GO:1905114	cell surface receptor signaling pathway involved in cell-cell signaling	58/2449	123/12275	8.44577e-12	1.10292e-10	5.45485e-11	tsh/Wnt4/Mmp2/wls/Cow/Bili/nkd/drl/Galphao/fz2/Diap1/Pp1-87B/Smn/dlp/SoxN/qvr/nAChRalpha7/Prosap/pan/arr/flw/Drl-2/spen/nmo/dally/crol/ttv/otk/phyl/Dyrk2/sfl/Apc/Flo2/Hipk/gish/Ssdp/skd/nej/osa/gro/lgs/fz/Roc1a/CtBP/arm/wts/dco/Sin3A/Sulf1/SkpA/aop/Rho1/Wnt10/CG17278/Axn/CkIalpha/apolpp/TER94	58		Male.marker.genes	GO:0098857	membrane microdomain	6/2364	12/11938	0.0184486	0.0421021	0.0218962	mGluR/Flo1/CG14184/Flo2/hts/CG14812	6
Female.marker.genes	GO:0005102	signaling receptor binding	81/2020	257/12127	2.25336e-09	5.38321e-08	3.67487e-08	Neb-cGP/Nplp1/sun/vn/Wnt4/Spn/ths/Nlg3/tai/Akap200/plx/Ephrin/Hr38/kek1/Sema1a/Toll-6/Nlg2/wry/csw/Galphao/wake/numb/Prosap/Ccn/sNPF/otk/Actbeta/dlg1/scrib/PVRAP/comm/Dl/Atg8a/ed/Galphas/Pvf3/sli/alien/Nrx-1/CASK/Nlg4/CG32683/crb/Src64B/Dad/Apoltp/Dh31/Ret/miple1/DOR/cv-2/spri/AstC/Proc/RhoGAPp190/Ms/bnl/Ilp7/Wnt10/Gpb5/pyr/poly/Galphaq/Stat92E/AstA/arm/Gprk1/mav/Axn/Pa1/Grip/CCHa2/Tk/spz5/CCHa1/…	81		Male.marker.genes	GO:0006836	neurotransmitter transport	64/2449	142/12275	8.78119e-12	1.14156e-10	5.64595e-11	gammaSnap1/VGAT/cpx/CG10804/Gdi/nemy/Rab3/sky/Hsc70-4/Frq2/nSyb/Chc/CG43066/Tomosyn/GABA-B-R2/unc-13-4A/Nrx-IV/veli/w/Ih/Syx1A/Dys/cac/Syx6/Fife/Exn/Syt12/Rim/CanB2/Sytbeta/VGlut/NFAT/Syt4/CanB/brp/Cadps/Snap25/GC1/Rop/nej/Syn/Cirl/unc-13/Syx13/CASK/BicD/Syt1/CG7708/lqf/Syt7/prt/Snap24/Arf102F/Frq1/Syngr/Rph/alphaSnap/twit/X11L/gammaSnap2/Arf51F/Syx7/Synd/lqfR	64		Male.marker.genes	GO:0005705	polytene chromosome interband	15/2364	44/11938	0.0184717	0.0421021	0.0218962	lawc/Hsp83/BEAF-32/Adf1/HP1c/Gug/JIL-1/Nlp/G9a/CG8677/Utx/nsl1/spt4/Mlf/REG	15
Female.marker.genes	GO:0005525	GTP binding	56/2020	154/12127	2.39169e-09	5.38321e-08	3.67487e-08	Rab3/betaTub56D/awd/CG42541/CG8641/Rgk3/Galphao/CG8500/chb/CG30158/CenG1A/pnut/Rab18/Rgk1/Rab27/Ric/shi/CG14669/Galphas/Rab14/Sep1/alphaTub84B/AdSS/Sar1/eEF1alpha1/Sep2/Arl4/Arl1/RabX4/CG4789/Rab11/Ran/128up/Rab7/Rac1/RhoGAPp190/Ras85D/Rgk2/eEF1alpha2/Rab35/Rap1/Rab26/eEF2/mEFTu1/Non1/Sep4/Arf79F/CG1354/Rab32/Mtl/eIF2gamma/Pu/Arf102F/Rho1/Rab5/alphaTub84D	56		Male.marker.genes	GO:0008219	cell death	129/2449	371/12275	8.99548e-12	1.16417e-10	5.75779e-11	Idh3b/mbl/abd-A/Abd-B/fwe/chrb/hdc/CG10257/Su(var)205/BI-1/Fili/Appl/Cam/ctp/futsch/Actbeta/aPKC/drpr/Chc/Bruce/mask/Sec61alpha/Ubr3/CG12384/Diap1/CG5059/Rheb/mats/PDCD-5/br/Pka-C1/norpA/S/puc/lola/vimar/CG4238/ftz-f1/hid/eEF5/Ccn/Eip74EF/EcR/Drep3/Sirt1/Drep1/Trf2/viaf/Pdk1/Galphaq/Fer2/Men/Pde8/cathD/Atg8a/pix/tau/eIF3m/Csk/Apc/rst/rdx/Hipk/yki/Prx3/Atg1/bun/Akt1/Atg17/Mdh2/Hsp60A/rpr/mav/skl/s…	129		Male.marker.genes	GO:0019867	outer membrane	16/2364	48/11938	0.0190299	0.0427962	0.0222572	Tom7/CG8004/porin/Msp300/Tom20/Mgstl/CG5059/klar/rpr/Fis1/Tom40/mge/Tspo/CG5676/Tom70/Marf	16
Female.marker.genes	GO:0032550	purine ribonucleoside binding	56/2020	154/12127	2.39169e-09	5.38321e-08	3.67487e-08	Rab3/betaTub56D/awd/CG42541/CG8641/Rgk3/Galphao/CG8500/chb/CG30158/CenG1A/pnut/Rab18/Rgk1/Rab27/Ric/shi/CG14669/Galphas/Rab14/Sep1/alphaTub84B/AdSS/Sar1/eEF1alpha1/Sep2/Arl4/Arl1/RabX4/CG4789/Rab11/Ran/128up/Rab7/Rac1/RhoGAPp190/Ras85D/Rgk2/eEF1alpha2/Rab35/Rap1/Rab26/eEF2/mEFTu1/Non1/Sep4/Arf79F/CG1354/Rab32/Mtl/eIF2gamma/Pu/Arf102F/Rho1/Rab5/alphaTub84D	56		Male.marker.genes	GO:0010975	regulation of neuron projection development	55/2449	114/12275	9.36206e-12	1.2062e-10	5.96567e-11	Rtca/Imp/Trim9/ham/Lar/CadN/PlexA/tutl/pros/fra/shot/Lis-1/Sema1a/Sar1/robo1/stan/Rheb/Adf1/nudC/Prosap/kuz/Dlic/Dscam1/CG34401/DAAM/Rac1/Ret/NetB/Abl/G9a/vvl/Rop/trio/Akt1/bif/chic/mav/sif/fz/PlexB/RhoGAPp190/unc-104/Nedd4/cv-c/Hr51/comm/wts/Rho1/Liprin-alpha/kn/Vang/Sema2a/CG42797/twf/Rab1	55		Male.marker.genes	GO:0031968	organelle outer membrane	16/2364	48/11938	0.0190299	0.0427962	0.0222572	Tom7/CG8004/porin/Msp300/Tom20/Mgstl/CG5059/klar/rpr/Fis1/Tom40/mge/Tspo/CG5676/Tom70/Marf	16
Female.marker.genes	GO:0032561	guanyl ribonucleotide binding	57/2020	158/12127	2.42788e-09	5.38321e-08	3.67487e-08	Rab3/betaTub56D/awd/CG42541/CG8641/Rgk3/Galphao/CG8500/chb/CG30158/CenG1A/pnut/Rab18/Rgk1/CG42260/Rab27/Ric/shi/CG14669/Galphas/Rab14/Sep1/alphaTub84B/AdSS/Sar1/eEF1alpha1/Sep2/Arl4/Arl1/RabX4/CG4789/Rab11/Ran/128up/Rab7/Rac1/RhoGAPp190/Ras85D/Rgk2/eEF1alpha2/Rab35/Rap1/Rab26/eEF2/mEFTu1/Non1/Sep4/Arf79F/CG1354/Rab32/Mtl/eIF2gamma/Pu/Arf102F/Rho1/Rab5/alphaTub84D	57		Male.marker.genes	GO:0032956	regulation of actin cytoskeleton organization	50/2449	99/12275	9.59592e-12	1.23084e-10	6.08752e-11	Btk29A/nwk/chinmo/CG43658/p120ctn/Akap200/sqh/Arpc5/svr/Gbeta13F/ed/Arpc4/Arpc3A/Arpc1/IRSp53/Pka-C1/Src64B/flw/ena/spir/DAAM/Abl/Cortactin/gish/Moe/Vrp1/mthl1/Kank/chic/fz/RhoBTB/PsGEF/hep/Nedd4/smog/shi/Cip4/dco/sals/Arpc2/Rho1/Arp3/capu/tmod/hts/Rack1/CG1674/twf/Lam/CG6891	50		Male.marker.genes	GO:1902911	protein kinase complex	16/2364	48/11938	0.0190299	0.0427962	0.0222572	put/wit/alc/Sik3/Cks85A/CycG/Atg1/Atg17/CG4629/PhKgamma/CycT/InR/Cdk5alpha/CycJ/Sik2/Cdk12	16
Female.marker.genes	GO:0019001	guanyl nucleotide binding	58/2020	163/12127	3.19736e-09	6.85302e-08	4.67825e-08	Rab3/betaTub56D/awd/CG42541/CG8641/Rgk3/Galphao/CG8500/chb/CG30158/CenG1A/pnut/Rab18/Rgk1/CG42260/Rab27/Ric/shi/CG14669/Galphas/Rab14/Sep1/alphaTub84B/AdSS/Sar1/eEF1alpha1/Sep2/Arl4/Arl1/RabX4/CG4789/Rab11/Ran/128up/Rab7/Rac1/RhoGAPp190/Ras85D/Rgk2/eEF1alpha2/Rab35/Rap1/Galphaq/Rab26/eEF2/mEFTu1/Non1/Sep4/Arf79F/CG1354/Rab32/Mtl/eIF2gamma/Pu/Arf102F/Rho1/Rab5/alphaTub84D	58		Male.marker.genes	GO:0016198	axon choice point recognition	22/2449	27/12275	1.04149e-11	1.32997e-10	6.57781e-11	dsx/Trim9/PlexA/tutl/fra/shot/sli/Sema1a/robo1/drl/lola/beat-Ia/Galphaq/Rac1/Abl/fru/kra/ab/RhoGAP93B/Nedd4/comm/alpha-Spec	22		Male.marker.genes	GO:0005884	actin filament	12/2364	33/11938	0.0198972	0.0443522	0.0230665	Msp300/sqh/pod1/Cortactin/Moe/Vrp1/Tm1/Arp3/capu/hts/twf/CG6891	12
Female.marker.genes	GO:0015077	monovalent inorganic cation transmembrane transporter activity	76/2020	238/12127	3.68706e-09	7.64768e-08	5.22073e-08	nrv3/GC1/CG10804/cype/blw/ATPsynCF6/VGAT/sun/COX5A/COX5B/Atpalpha/kcc/COX8/COX7C/ND-MLRQ/ATPsynB/COX4/Vha26/COX6B/ATPsyndelta/Vha55/Vha44/ATPsynE/SPoCk/levy/Calx/ATPsyngamma/ATPsynbeta/CG42340/nrv2/COX7A/GluRIA/Shawl/eag/CG42594/SK/para/Sh/CG1688/VhaAC45/Shaw/KCNQ/CG43066/SLO2/prt/Elk/Vha16-1/slo/Ndae1/Vha36-1/Hk/Shab/Eaat2/Vha100-1/VhaM9.7-b/CG31030/Ih/Nckx30C/tipE/Task6/ATPsynC/VhaM9.7-a/Vha13/…	76		Male.marker.genes	GO:0055086	nucleobase-containing small molecule metabolic process	132/2449	384/12275	1.28306e-11	1.63123e-10	8.06781e-11	ND-SGDH/Dak1/ND-42/CG7920/ND-ASHI/ND-B14.5B/ND-15/Tpi/Pgk/SdhB/scu/SdhC/Cyt-c1/ND-19/UQCR-C2/ND-B12/ND-PDSW/UQCR-C1/ATPsynbeta/COX5A/COX4/UQCR-14/CG14757/Cyt-c-p/PyK/sesB/Pglym78/CG6330/Eno/Gapdh2/Gapdh1/blw/Mdh1/UQCR-Q/ATPsynCF6/cype/sun/COX5B/UQCR-6.4/ND-13A/ATPsynB/COX7C/Oscillin/PlexA/Vha68-1/Dg/Gycalpha99B/Nos/awd/Pde6/COX7A/CRMP/Scox/CG5065/CG12065/Pde1c/Hex-A/Pde11/CG7834/Pde8/Ac78C/Pde9/G…	132		Male.marker.genes	GO:0016607	nuclear speck	12/2364	33/11938	0.0198972	0.0443522	0.0230665	SF2/rump/mam/B52/SC35/x16/HnRNP-K/sqd/Rbp1/Rbp1-like/ctrip/Rsf1	12
Female.marker.genes	GO:0001883	purine nucleoside binding	56/2020	157/12127	5.38634e-09	1.04952e-07	7.1646e-08	Rab3/betaTub56D/awd/CG42541/CG8641/Rgk3/Galphao/CG8500/chb/CG30158/CenG1A/pnut/Rab18/Rgk1/Rab27/Ric/shi/CG14669/Galphas/Rab14/Sep1/alphaTub84B/AdSS/Sar1/eEF1alpha1/Sep2/Arl4/Arl1/RabX4/CG4789/Rab11/Ran/128up/Rab7/Rac1/RhoGAPp190/Ras85D/Rgk2/eEF1alpha2/Rab35/Rap1/Rab26/eEF2/mEFTu1/Non1/Sep4/Arf79F/CG1354/Rab32/Mtl/eIF2gamma/Pu/Arf102F/Rho1/Rab5/alphaTub84D	56		Male.marker.genes	GO:0007612	learning	40/2449	71/12275	1.32518e-11	1.67739e-10	8.29612e-11	Btk29A/14-3-3zeta/Gad1/Sap47/mGluR/Nrx-1/futsch/Rdl/DopEcR/drl/Fas2/Tbh/Pp1-87B/Adf1/dnc/Pka-C1/eag/rad/AGO1/Alk/FoxP/vn/Pka-R1/mnb/gish/Oamb/G9a/Dop1R1/simj/eas/Syn/Shal/Blos1/Nipped-B/prt/rut/shi/Nmdar1/spi/Fdh	40		Male.marker.genes	GO:0030662	coated vesicle membrane	13/2364	37/11938	0.0211679	0.0468383	0.0243594	Chc/Sar1/VAChT/BicD/lqf/AP-1sigma/AP-2sigma/CG5946/CG9132/Afti/AP-2mu/Sec22/Sec16	13
Female.marker.genes	GO:0032549	ribonucleoside binding	56/2020	157/12127	5.38634e-09	1.04952e-07	7.1646e-08	Rab3/betaTub56D/awd/CG42541/CG8641/Rgk3/Galphao/CG8500/chb/CG30158/CenG1A/pnut/Rab18/Rgk1/Rab27/Ric/shi/CG14669/Galphas/Rab14/Sep1/alphaTub84B/AdSS/Sar1/eEF1alpha1/Sep2/Arl4/Arl1/RabX4/CG4789/Rab11/Ran/128up/Rab7/Rac1/RhoGAPp190/Ras85D/Rgk2/eEF1alpha2/Rab35/Rap1/Rab26/eEF2/mEFTu1/Non1/Sep4/Arf79F/CG1354/Rab32/Mtl/eIF2gamma/Pu/Arf102F/Rho1/Rab5/alphaTub84D	56		Male.marker.genes	GO:0045216	cell-cell junction organization	37/2449	63/12275	1.42573e-11	1.79679e-10	8.88665e-11	kune/pasi2/crim/p120ctn/pasi1/pyd/cold/Lac/nrv2/pck/Mmp2/Cont/Atpalpha/shakB/Nrg/aPKC/CadN2/sns/Galphao/Nrx-IV/bou/sdt/crb/Src64B/kirre/CG44325/CG42748/dlg1/arm/cora/btsz/scrib/stck/shg/wun/baz/vari	37		Male.marker.genes	GO:0035770	ribonucleoprotein granule	26/2364	89/11938	0.0211976	0.0468383	0.0243594	PyK/Syp/bru1/Fs(2)Ket/poe/CG4612/eIF4E1/eIF4A/CG11486/tapas/tud/Hrb27C/pum/Tm1/CG9425/Dbp80/CG10418/Rpb7/pAbp/CG9344/roq/Rcd-1/SNRPG/LSm3/TER94/Rga	26
Female.marker.genes	GO:0003924	GTPase activity	53/2020	146/12127	6.83735e-09	1.29306e-07	8.82717e-08	Rab3/Scp2/betaTub56D/CG42541/sky/CG8641/Rgk3/Galphao/CG8500/CG30158/CenG1A/pnut/Rab18/CG43324/Rgk1/Rab27/Ric/shi/CG14669/Galphas/Rab14/Sep1/alphaTub84B/Sar1/eEF1alpha1/Ggamma30A/Sep2/Arl1/RabX4/CG4789/Rab11/Ran/Rab7/Rac1/RhoGAPp190/Ras85D/Rgk2/eEF1alpha2/Rab35/Rap1/Galphaq/Gyc88E/Rab26/eEF2/mEFTu1/Sep4/Arf79F/Rab32/Mtl/eIF2gamma/Rho1/Rab5/alphaTub84D	53		Male.marker.genes	GO:1901701	cellular response to oxygen-containing compound	70/2449	163/12275	1.52233e-11	1.9102e-10	9.44752e-11	DENR/Drat/PyK/Blimp-1/Sod1/Ggamma30A/Nurf-38/Hr4/Akap200/Cam/DopEcR/mAChR-A/Oatp74D/Tl/Rheb/CG14184/br/Pka-C1/DOR/EcR/Hr38/Sik3/Sirt1/Pdk1/Galphaq/Pde8/poly/CycG/Crtc/Sesn/G9a/Dop1R1/mAChR-B/Sod2/sima/Akt1/Jafrac1/Sh/E(bx)/Roc1a/wrd/Stat92E/Utx/foxo/Pka-R2/Dop1R2/HDAC4/wdb/InR/dj-1beta/SkpA/Pp2A-29B/Pdxk/Sirup/Ilp7/FASN1/ImpL2/Pi3K21B/Myc/CG4390/Sik2/bsk/Lpin/Thor/CrzR/STUB1/Fdh/CG14812/p38b/dock	70		Male.marker.genes	GO:0005720	nuclear heterochromatin	8/2364	19/11938	0.0218997	0.0479709	0.0249484	Su(var)205/Sirt1/Psc/Su(z)2/E(Pc)/MED26/HP4/Su(var)2-HP2	8
Female.marker.genes	GO:0016651	oxidoreductase activity, acting on NAD(P)H	31/2020	66/12127	9.14719e-09	1.68047e-07	1.14718e-07	ND-30/ND-MLRQ/ND-B12/Nos/ND-51/ND-39/CG5946/ND-B14.5A/Duox/ND-20/ND-B14/ND-B14.5B/ND-B15/ND-PDSW/ND-B16.6/ND-19/ND-ASHI/ND-24/ND-SGDH/ND-23/ND-13B/ND-B18/ND-B22/Trxr-1/ND-18/ND-B17.2/ND-42/ND-B17/ND-75/ND-49/Fdh	31		Male.marker.genes	GO:0051253	negative regulation of RNA metabolic process	141/2449	420/12275	1.80951e-11	2.26071e-10	1.11811e-10	abd-A/Ubx/tsh/Antp/dsx/Blimp-1/zfh2/salr/Ssb-c31a/Lim1/bi/ct/Hsc70-4/Hr4/emc/Eip78C/Eip75B/Su(var)205/l(3)neo38/BI-1/vig2/Tlk/pros/Pdcd4/sbb/Sox102F/CG12384/r2d2/HP1c/CG43689/gpp/pan/Gug/bin3/scrt/D/CG9932/bol/CG12605/erm/jim/fs(1)h/corto/Dsp1/AGO1/Smr/Hr3/crol/lolal/JIL-1/chn/cic/Mad/Hrb98DE/EcR/Sirt1/Psc/Su(z)2/jing/CG8036/rhea/pum/sqd/upSET/shn/CG43347/Oamb/TfAP-2/simj/kis/gro/CG8677/drm/odd/m…	141		Male.marker.genes	GO:0090568	nuclear transcriptional repressor complex	8/2364	19/11938	0.0218997	0.0479709	0.0249484	Mad/shn/simj/MBD-like/NC2beta/H/Mi-2/MTA1-like	8
Female.marker.genes	GO:0042802	identical protein binding	56/2020	160/12127	1.17549e-08	2.09956e-07	1.43328e-07	Sod1/Tpi/ctp/CadN/drl/Dscam4/bru3/Ten-m/CadN2/corto/Dscam2/Ace/Ten-a/Syt1/trx/Dscam1/Dscam3/otk/pnut/14-3-3zeta/bun/FoxP/mim/rdx/da/ari-1/Sep1/rpr/robo2/Liprin-gamma/alien/Lac/Gdh/Sep2/trsn/Oscillin/otk2/grim/mirr/CtBP/MBD-like/Gyc88E/psq/inc/svp/oc/per/Trxr-1/Taf12/Khc-73/Meltrin/Camta/CTPsyn/REPTOR-BP/Pak3/Gsc	56		Male.marker.genes	GO:0048190	wing disc dorsal/ventral pattern formation	33/2449	53/12275	1.93005e-11	2.39061e-10	1.18236e-10	gammaSnap1/ap/14-3-3epsilon/nmd/Cow/drpr/Hs3st-B/sbb/dlp/crb/lilli/nuf/CG1943/CG5890/nmo/dally/cic/tara/shn/Mpcp2/skd/osa/sno/Su(Tpl)/CG14073/H/Dl/Sulf1/cbt/capt/vg/pnt/Rab7	33		Female.marker.genes	GO:0045202	synapse	150/2074	283/11938	2.31321e-43	1.16354e-40	6.62308e-41	Sap47/Cbp53E/unc-13-4A/VGAT/fwe/Hasp/nSyb/Lrp4/Gdi/nwk/Sytbeta/Rab3/Tob/VGlut/nAChRalpha6/stai/Spn/nAChRalpha5/GluClalpha/jeb/X11Lbeta/CanB2/dlp/Nlg3/Gycbeta100B/Ten-m/wit/Mical/hig/Fife/sky/Fas3/Frq2/Rdl/dysc/Syp/nAChRalpha1/Nlg2/Ten-a/Snap25/Rim/mnb/Con/ena/Syx1A/Neto/inaE/orb2/Syt1/sif/Pdk1/Prosap/Fas2/kek6/Dg/prt/Rgk1/Dop1R2/CanB/Rbp/cpx/dlg1/Tomosyn/Rab27/scrib/brp/cact/shi/slo/Drep2/Atg8a/m…	150
Female.marker.genes	GO:0001882	nucleoside binding	56/2020	161/12127	1.51451e-08	2.63198e-07	1.79673e-07	Rab3/betaTub56D/awd/CG42541/CG8641/Rgk3/Galphao/CG8500/chb/CG30158/CenG1A/pnut/Rab18/Rgk1/Rab27/Ric/shi/CG14669/Galphas/Rab14/Sep1/alphaTub84B/AdSS/Sar1/eEF1alpha1/Sep2/Arl4/Arl1/RabX4/CG4789/Rab11/Ran/128up/Rab7/Rac1/RhoGAPp190/Ras85D/Rgk2/eEF1alpha2/Rab35/Rap1/Rab26/eEF2/mEFTu1/Non1/Sep4/Arf79F/CG1354/Rab32/Mtl/eIF2gamma/Pu/Arf102F/Rho1/Rab5/alphaTub84D	56		Male.marker.genes	GO:0048859	formation of anatomical boundary	33/2449	53/12275	1.93005e-11	2.39061e-10	1.18236e-10	hth/Abd-B/tsh/ct/put/Rab11/sqh/fra/sli/robo1/numb/nuf/dally/phyl/Mad/ena/NetB/shn/caup/ara/robo2/mew/fz/CtBP/H/B-H1/B-H2/exd/neur/mirr/ato/tkv/klu	33		Female.marker.genes	GO:0031226	intrinsic component of plasma membrane	205/2074	479/11938	1.65544e-40	4.16344e-38	2.3699e-38	nrv3/SIFaR/fwe/Atpalpha/kcc/Nmdar2/DIP-delta/mGluR/CadN/nAChRalpha6/5-HT1A/fz2/dpr5/nAChRalpha5/dpr13/Oct-TyrR/dpr8/CG42340/GluClalpha/dpr18/drl/nrv2/Dscam4/GluRIB/AstC-R1/GluRIA/stan/dlp/dpr20/Nlg3/Shawl/Tsp39D/Ten-m/dpr14/wit/Ephrin/CadN2/DIP-beta/Ca-alpha1T/eag/GABA-B-R3/CG42594/kek1/para/Rdl/Ac13E/Sh/dpr9/tutl/AstA-R1/Dscam2/nAChRalpha1/Nlg2/CG12290/AstC-R2/kek5/CG1688/kek2/Neto/Dh44-R1/Shaw/…	205
Female.marker.genes	GO:0005231	excitatory extracellular ligand-gated ion channel activity	11/2020	12/12127	2.72447e-08	4.55512e-07	3.10958e-07	nAChRalpha6/nAChRalpha5/GluClalpha/nAChRalpha1/nAChRbeta1/nAChRalpha3/nAChRalpha7/nAChRalpha2/nAChRbeta2/nAChRalpha4/Grd	11		Male.marker.genes	GO:0045934	negative regulation of nucleobase-containing compound metabolic process	147/2449	444/12275	2.14425e-11	2.64457e-10	1.30796e-10	abd-A/Ubx/tsh/Antp/dsx/Blimp-1/zfh2/salr/Ssb-c31a/Lim1/bi/ct/Hsc70-4/Hr4/emc/Eip78C/Eip75B/Su(var)205/l(3)neo38/BI-1/vig2/RnpS1/Tlk/tsu/pros/Pdcd4/Nos/sbb/Sox102F/CG12384/r2d2/mago/HP1c/CG43689/gpp/pan/Gug/bin3/scrt/D/CG9932/bol/CG12605/erm/jim/fs(1)h/corto/Dsp1/AGO1/Smr/Hr3/crol/lolal/JIL-1/chn/cic/Mad/Hrb98DE/EcR/Sirt1/Psc/Su(z)2/jing/CG8036/rhea/pum/sqd/upSET/shn/CG43347/Oamb/TfAP-2/simj/kis/g…	147		Female.marker.genes	GO:0005887	integral component of plasma membrane	198/2074	465/11938	9.94391e-39	1.66726e-36	9.49033e-37	nrv3/SIFaR/fwe/Atpalpha/kcc/Nmdar2/DIP-delta/mGluR/CadN/nAChRalpha6/5-HT1A/fz2/dpr5/nAChRalpha5/dpr13/Oct-TyrR/dpr8/CG42340/GluClalpha/dpr18/drl/nrv2/Dscam4/GluRIB/AstC-R1/GluRIA/stan/dpr20/Nlg3/Shawl/Tsp39D/Ten-m/dpr14/wit/Ephrin/CadN2/DIP-beta/Ca-alpha1T/eag/GABA-B-R3/CG42594/kek1/para/Rdl/Ac13E/Sh/dpr9/tutl/AstA-R1/Dscam2/nAChRalpha1/Nlg2/CG12290/AstC-R2/kek5/CG1688/kek2/Neto/Dh44-R1/Shaw/mACh…	198
Female.marker.genes	GO:0001158	enhancer sequence-specific DNA binding	19/2020	31/12127	2.76283e-08	4.55512e-07	3.10958e-07	hth/sd/pan/Mad/Mef2/ey/Antp/vvl/CrebA/hb/aop/pho/tup/Abd-B/abd-A/Ubx/en/exd/sv	19		Male.marker.genes	GO:0030431	sleep	40/2449	72/12275	2.41049e-11	2.96029e-10	1.46411e-10	VGAT/GABA-B-R3/trsn/Calr/Hsp83/Hsc70-3/Rdl/CG6329/Ktl/Nlg4/5-HT1A/Nca/Ih/qvr/Pka-C1/Hk/CanB2/EcR/Sik3/tara/wake/Men/CanB/Shaw/TfAP-2/Shab/Acer/Sh/CanA-14F/Nipped-B/cv-c/rut/Dop1R2/InR/mld/Nedd8/tim/nAChRalpha4/Pp2B-14D/Ets96B	40		Female.marker.genes	GO:0044456	synapse part	113/2074	209/11938	6.78522e-34	8.53241e-32	4.85679e-32	Cbp53E/unc-13-4A/VGAT/fwe/Hasp/nSyb/Lrp4/Gdi/Sytbeta/Rab3/Tob/VGlut/nAChRalpha6/Spn/nAChRalpha5/jeb/X11Lbeta/CanB2/Gycbeta100B/Ten-m/Mical/hig/Fife/sky/Frq2/Syp/nAChRalpha1/Nlg2/Ten-a/Snap25/Rim/mnb/ena/Syx1A/Neto/inaE/orb2/Syt1/Prosap/Fas2/kek6/prt/Rgk1/Dop1R2/CanB/Rbp/cpx/dlg1/Tomosyn/Rab27/scrib/brp/shi/slo/Drep2/Atg8a/metro/nAChRbeta1/VAChT/Magi/lap/nAChRalpha3/nAChRalpha7/eIF4E1/Vha100-1/Alk…	113
Female.marker.genes	GO:1990837	sequence-specific double-stranded DNA binding	100/2020	359/12127	4.56949e-08	7.34546e-07	5.01441e-07	Blimp-1/salr/hth/zfh2/Lim1/ap/ftz-f1/scro/ct/toy/Su(var)205/Hr4/HmgD/Xbp1/bi/Hr38/kay/NK7.1/CG12605/Trf2/sd/Atf3/CG32767/Xrp1/CG9932/cic/pan/Hr3/Eip75B/Mad/Mef2/ey/Hr51/Dif/NFAT/CG10543/Pur-alpha/da/Antp/grn/vvl/br/sqd/nonA/CG43689/disco/dmrt99B/bab1/bab2/D1/EcR/TfAP-2/CrebA/dve/fkh/Ptx1/sim/rn/Sidpn/PHDP/Awh/hb/Lim3/Pdp1/CG18599/Optix/Rx/CG32532/zfh1/aop/pho/MESR3/Hers/Stat92E/Drgx/tup/Dll/svp/z…	100		Male.marker.genes	GO:0051648	vesicle localization	51/2449	104/12275	2.4658e-11	3.01539e-10	1.49136e-10	gammaSnap1/sesB/cpx/Rab3/sky/nSyb/Chc/Lis-1/Tomosyn/GABA-B-R2/Sar1/Dhc64C/unc-13-4A/Nrx-IV/Syx1A/Syx6/Fife/Rim/Klp98A/Sytbeta/NFAT/Syt4/Cadps/Snap25/Rop/RhoGAP100F/Syn/unc-13/Syx13/wrd/CASK/Blos1/unc-104/BicD/Syt1/Khc-73/Syt7/Rab27/shi/Snap24/Aplip1/Syngr/Drp1/Rph/alphaSnap/Liprin-alpha/X11L/Pldn/gammaSnap2/Syx7/Sec16	51		Female.marker.genes	GO:0044391	ribosomal subunit	101/2074	180/11938	3.22585e-32	3.2452e-30	1.84722e-30	tko/RpLP0/RpL12/RpS6/RpL15/RpL36/RpS13/mRpL28/RpL23/RpS3A/sta/mRpS10/mRpS7/mRpL14/mRpL15/RpL26/RpL28/RpL41/RpS25/RpS27/RpS20/RpL27A/RpL32/RpS9/RpL23A/RpL8/RpL37A/RpL24-like/LTV1/RpL5/RpS15Aa/RpL19/RpLP2/mRpS22/mRpL27/mRpL24/mRpL47/mRpL52/mRpL2/mRpL12/mRpS24/mRpS6/RpL40/RpS7/mRpS2/RpL35/mRpS33/RpS2/RpL38/RpL18A/mRpL21/mRpS21/mRpL19/bonsai/mRpL41/mRpL13/mRpL1/RpL34a/RpL36A/RpS23/mRpL37/mRpL17/mRpS3…	101
Female.marker.genes	GO:0001067	regulatory region nucleic acid binding	102/2020	369/12127	5.11397e-08	7.82924e-07	5.34467e-07	Blimp-1/salr/hth/zfh2/Lim1/ap/ftz-f1/scro/ct/toy/Hr4/Xbp1/bi/Hr38/kay/NK7.1/CG12605/Trf2/sd/Atf3/CG32767/erm/CG9932/cic/pan/Smr/Hr3/Eip75B/Mad/Mef2/ey/Hr51/Dif/NFAT/CG10543/Pur-alpha/Mnn1/da/Antp/grn/vvl/br/Rbfox1/nonA/E2f1/CG43689/disco/dmrt99B/CG16779/EcR/TfAP-2/CrebA/dve/fkh/Ptx1/sim/rn/Sidpn/PHDP/Awh/hb/Lim3/Pdp1/CG18599/Optix/Rx/CG32532/zfh1/aop/pho/MESR3/Hers/Stat92E/Drgx/tup/pnt/Dll/svp/zl…	102		Male.marker.genes	GO:0048469	cell maturation	81/2449	202/12275	2.80251e-11	3.41268e-10	1.68786e-10	Imp/14-3-3zeta/hdc/Syp/14-3-3epsilon/CkIIalpha/Rab11/tsu/CSN5/rump/ctp/Hsp83/shep/bai/aPKC/drpr/Chc/Ca-alpha1D/enc/Lis-1/Dg/Dhc64C/Fas2/mago/SmD3/lost/Syx1A/klar/Pka-C1/cac/tld/ftz-f1/flw/Rim/orb/tud/cic/shrb/EcR/plum/Hrb27C/spir/jvl/heph/poly/Pka-R1/sqd/Moe/chb/Tm1/Rop/kis/glo/chic/Rab6/Roc1a/CkIIbeta/dlg1/BicD/Syt1/Mical/cnc/psq/Hr51/scrib/bic/Ca-beta/InR/cni/SkpA/Atg6/capt/sog/shg/baz/Hydr2/bs…	81		Female.marker.genes	GO:0043005	neuron projection	173/2074	429/11938	2.41145e-30	2.0216e-28	1.15073e-28	Imp/Cbp53E/VGAT/kcc/hdc/nSyb/Lrp4/CadN/nAChRalpha6/NetB/5-HT1A/stai/Spn/dpr5/nAChRalpha5/dpr13/Lar/dpr8/GluClalpha/jeb/dpr18/drl/nrv2/Dscam4/Trim9/X11Lbeta/robo3/plum/dpr20/dpr15/Ptp10D/Shawl/dpr14/dpr4/Mical/Ptp99A/klg/SK/sky/Rdl/dysc/dpr9/Mmp2/tutl/Dscam2/nAChRalpha1/Snap25/mnb/Con/ena/dpr6/Syx1A/dpr10/orb2/dpr12/Shaw/mAChR-A/Syt1/fra/unc-104/chb/erm/CG44153/rad/Prosap/Fas2/DIP-gamma/kek6/Dscam…	173
Female.marker.genes	GO:0044212	transcription regulatory region DNA binding	102/2020	369/12127	5.11397e-08	7.82924e-07	5.34467e-07	Blimp-1/salr/hth/zfh2/Lim1/ap/ftz-f1/scro/ct/toy/Hr4/Xbp1/bi/Hr38/kay/NK7.1/CG12605/Trf2/sd/Atf3/CG32767/erm/CG9932/cic/pan/Smr/Hr3/Eip75B/Mad/Mef2/ey/Hr51/Dif/NFAT/CG10543/Pur-alpha/Mnn1/da/Antp/grn/vvl/br/Rbfox1/nonA/E2f1/CG43689/disco/dmrt99B/CG16779/EcR/TfAP-2/CrebA/dve/fkh/Ptx1/sim/rn/Sidpn/PHDP/Awh/hb/Lim3/Pdp1/CG18599/Optix/Rx/CG32532/zfh1/aop/pho/MESR3/Hers/Stat92E/Drgx/tup/pnt/Dll/svp/zl…	102		Male.marker.genes	GO:0002064	epithelial cell development	129/2449	377/12275	3.15006e-11	3.81978e-10	1.8892e-10	tsr/ct/sosie/Syp/pasi2/Fas3/pasi1/Lar/Hsc70-4/emc/Rab11/sqh/Fs(2)Ket/Prosalpha7/zip/aPKC/rin/Lis-1/ed/Dhc64C/SERCA/stai/smt3/pigs/mam/veli/r2d2/Diap1/mats/br/S/crb/kuz/puc/kug/tai/Src64B/Socs36E/cindr/bib/orb/Rala/mbc/Smr/Evi5/toc/cic/sty/Mad/EcR/kay/Gprk2/Hrb27C/Parp/ena/jing/spir/jvl/vn/Rac1/rhea/sqd/Apc/Abl/spri/Cortactin/18w/Mef2/yki/Rop/kis/nej/bun/Not1/RhoGAP71E/kra/mid/ab/fz/hep/mim/CG4109…	129		Female.marker.genes	GO:0098798	mitochondrial protein complex	121/2074	270/11938	2.66195e-26	1.9128e-24	1.0888e-24	UQCR-Q/cype/ATPsynF/blw/Neb-cGP/ATPsynCF6/UQCR-14/sun/COX5A/COX5B/tko/COX7C/Tim8/ND-B14.7/ND-30/QIL1/ND-MLRQ/UQCR-6.4/ND-13A/SdhC/RFeSP/ATPsynB/COX4/Cyt-c1/CG6878/COX6B/ATPsyndelta/CG5903/UQCR-C2/ATPsynE/levy/ND-ACP/ATPsyngamma/ND-B12/ATPsynbeta/COX7A/Tom20/mRpL28/scu/ND-51/ND-39/mRpS10/mRpS7/mRpL14/mRpL15/ND-B14.5A/ox/CG11752/ATPsynC/ND-20/ND-B14/ND-B14.5B/ATPsynD/ATPsynG/ND-15/ATPsynO/ND-B15/ND…	121
Female.marker.genes	GO:0000976	transcription regulatory region sequence-specific DNA binding	93/2020	329/12127	6.3838e-08	9.48538e-07	6.47525e-07	Blimp-1/salr/hth/zfh2/Lim1/ap/ftz-f1/scro/ct/toy/Hr4/Xbp1/bi/Hr38/kay/NK7.1/CG12605/Trf2/sd/Atf3/CG32767/CG9932/cic/pan/Hr3/Eip75B/Mad/Mef2/ey/Hr51/Dif/NFAT/CG10543/Pur-alpha/da/Antp/grn/vvl/br/nonA/CG43689/disco/dmrt99B/EcR/TfAP-2/CrebA/dve/fkh/Ptx1/sim/rn/Sidpn/PHDP/Awh/hb/Lim3/Pdp1/CG18599/Optix/Rx/CG32532/zfh1/aop/pho/MESR3/Hers/Stat92E/Drgx/tup/Dll/svp/zld/Lmx1a/Hey/per/CG7368/Abd-B/slou/abd…	93		Male.marker.genes	GO:0009628	response to abiotic stimulus	150/2449	458/12275	3.3224e-11	4.0119e-10	1.98422e-10	CG8778/Tpi/Drat/tko/porin/VGAT/14-3-3zeta/Hsp23/Gad1/CG6330/nrv3/slgA/Hsp67Ba/Calx/kcc/Ggamma30A/14-3-3epsilon/Hsp67Bc/rdgA/Hsp26/Hsp27/Hsc70-4/Hr4/CG5446/M6/Atpalpha/Appl/Cam/Hsp83/shakB/tutl/shep/zip/Hsc70-3/Rdl/Vha68-1/nonA/Pis/Mtor/para/GABA-B-R2/Gycalpha99B/Eip93F/CG34353/Galphas/CG33129/Pp1-87B/Gp93/CG17059/lov/w/Ih/br/dnc/nAChRalpha7/Pka-C1/inaE/norpA/cac/tipE/eys/hid/msi/Ace/nmo/Dscam1/Gp…	150		Female.marker.genes	GO:0030424	axon	109/2074	231/11938	4.32393e-26	2.71867e-24	1.54751e-24	Imp/Cbp53E/kcc/hdc/nSyb/Lrp4/CadN/NetB/Lar/jeb/drl/nrv2/Dscam4/Trim9/robo3/plum/Ptp10D/Shawl/Mical/Ptp99A/klg/sky/Rdl/tutl/Dscam2/Snap25/mnb/Con/ena/Syx1A/orb2/Shaw/Syt1/fra/unc-104/chb/erm/CG44153/rad/Prosap/Fas2/kek6/Dscam1/Dscam3/sNPF/gogo/prt/cpx/dlg1/shi/Unc-76/Atg8a/ringer/metro/VAChT/trio/Lis-1/ckn/Magi/CLIP-190/Aplip1/robo2/Alk/robo1/InR/Ptp69D/Nrx-1/CASK/alphaSnap/gukh/pyd/futsch/Ret/Rab…	109
Female.marker.genes	GO:0003730	mRNA 3'-UTR binding	21/2020	38/12127	6.49077e-08	9.48538e-07	6.47525e-07	Imp/shep/Sxl/Hrb27C/brat/bru1/orb2/pAbp/bol/Rbfox1/heph/sqd/CG9705/D/rump/ssx/orb/pum/Unr/stau/CG4612	21		Male.marker.genes	GO:0002065	columnar/cuboidal epithelial cell differentiation	124/2449	359/12275	3.80012e-11	4.56965e-10	2.26007e-10	Abd-B/tsr/ct/sosie/Syp/Fas3/Lar/Hsc70-4/emc/Rab11/sqh/Fs(2)Ket/Prosalpha7/zip/rin/Lis-1/ed/Dhc64C/SERCA/stai/smt3/pigs/mam/veli/r2d2/Diap1/mats/br/S/kuz/puc/numb/kug/tai/Src64B/Socs36E/cindr/bib/orb/Rala/mbc/Smr/Evi5/toc/phyl/cic/sty/Mad/EcR/kay/Hrb27C/Parp/ena/jing/spir/jvl/vn/Rac1/rhea/sqd/Apc/spri/Cortactin/18w/Mef2/yki/Rop/kis/nej/bun/Not1/kra/mid/ab/fz/hep/mim/CASK/dlg1/Stat92E/csw/Ptpmeg/da…	124		Female.marker.genes	GO:0098793	presynapse	82/2074	153/11938	1.49359e-24	8.34752e-23	4.75154e-23	Cbp53E/unc-13-4A/VGAT/fwe/nSyb/Lrp4/Gdi/Sytbeta/Rab3/VGlut/jeb/CanB2/Gycbeta100B/Mical/Fife/sky/Frq2/Ten-a/Snap25/Rim/mnb/ena/Syx1A/orb2/Syt1/Prosap/Fas2/kek6/prt/Rgk1/Dop1R2/CanB/Rbp/cpx/dlg1/Tomosyn/Rab27/brp/Atg8a/metro/VAChT/Magi/lap/Vha100-1/Alk/Nrx-1/CASK/alphaSnap/gukh/Exn/RabX4/Rab11/Clc/RhoGAP100F/Syn/cac/Rph/Syngr/Bsg/Syt7/Vmat/DAT/pum/Ank2/Rab3-GEF/CaMKII/Cirl/Syt4/Grip/g/Cadps/stj/sta…	82
Female.marker.genes	GO:0008092	cytoskeletal protein binding	85/2020	294/12127	7.95494e-08	1.13667e-06	7.75956e-07	Msp300/tsr/stai/Spn/CG14535/Jupiter/awd/pigs/Ten-m/Akap200/Moe/Mical/CadN2/CG17816/unc-104/chb/pnut/Klp98A/cora/Tomosyn/shi/Unc-76/aPKC/ringer/Lis-1/mim/CLIP-190/CG8726/syd/Svil/Aplip1/cib/Dys/klar/crb/CG3104/CG15097/Cam/futsch/RpL23/CG3226/BuGZ/sqh/Smn/Unc-115a/Kank/chic/Tm1/capt/CG32264/Hsp26/sals/BicD/didum/Cdep/bif/alpha-Spec/inc/sn/jar/Arpc1/shot/capu/stau/Mlc-c/Arpc3A/spir/tacc/Arpc5/pod1/c…	85		Male.marker.genes	GO:0035218	leg disc development	50/2449	102/12275	3.93238e-11	4.70907e-10	2.32903e-10	hth/Ubx/tsh/tsr/Lim1/Bx/ap/CG43658/noc/wls/GEFmeso/Hs3st-B/disco/Gug/arr/Exn/ftz-f1/bab1/bab2/rho/Drak/Dsp1/dally/Mad/jing/vn/CG42674/TfAP-2/trio/skd/osa/RhoGAP19D/RhoGAP71E/lgs/drm/odd/dac/mid/sd/B-H1/B-H2/Dl/C15/rn/Pax/dve/Rho1/vg/pnt/Dll	50		Female.marker.genes	GO:0098797	plasma membrane protein complex	88/2074	173/11938	3.80162e-24	1.91221e-22	1.08846e-22	nrv3/Atpalpha/Nmdar2/Vha26/Vha55/Vha44/mGluR/nAChRalpha6/sdt/nAChRalpha5/nrv2/GluRIB/GluRIA/Shawl/Flo1/Moe/wit/CadN2/Ca-alpha1T/eag/GABA-B-R3/para/Sh/nAChRalpha1/VhaAC45/Neto/Galphao/Shaw/KCNQ/put/Syn1/Prosap/Dg/Elk/dlg1/scrib/norpA/Vha16-1/Dl/aPKC/nAChRbeta1/Dyb/VAChT/Vha36-1/AP-2sigma/Ca-alpha1D/Galphas/Ca-beta/babo/Hk/Shab/nAChRalpha3/nAChRalpha7/Scgalpha/VhaM9.7-b/InR/GABA-B-R1/aph-1/CG31030/…	88
Female.marker.genes	GO:0016301	kinase activity	98/2020	355/12127	1.00409e-07	1.40354e-06	9.58135e-07	Pgk/Dak1/PhKgamma/CG4546/sdt/awd/nmo/PKD/Adk1/CG34384/cdi/JIL-1/wit/rdgA/bma/Hex-A/mnb/Gprk2/Gk2/Csk/CG2201/Hipk/CG31140/Sik3/put/Drak/Dyrk2/Dgk/fwd/Pdk1/CG4629/CG32944/otk/CG31145/eas/Pka-C3/Pka-C1/Pkc53E/dlg1/Pkc98E/Slob/CycG/gish/aPKC/trio/SRPK/Pitslre/wts/Asator/babo/Eph/Alk/InR/CASK/msn/alc/Eip63E/Src64B/Lk6/Ret/Ddr/Argk/Ror/hppy/Pvr/Btk29A/Pdxk/sff/CaMKII/Strn-Mlck/Haspin/Abl/Dpck/Aduk/Gprk…	98		Male.marker.genes	GO:0001708	cell fate specification	49/2449	99/12275	3.95809e-11	4.72027e-10	2.33457e-10	hth/abd-A/Ubx/Abd-B/Antp/bi/pyd/pros/nkd/ed/ths/Smn/numb/bib/rho/chn/Mad/jeb/vn/Apc/ara/tup/yki/simj/robo2/bun/dac/mid/salm/dlg1/lqf/arm/ey/Dl/scrib/pcs/wts/C15/pyr/exd/rn/aop/sv/exex/slou/pnt/kn/tkv/msk	49		Female.marker.genes	GO:0098800	inner mitochondrial membrane protein complex	79/2074	150/11938	4.70624e-23	2.15204e-21	1.22497e-21	UQCR-Q/cype/ATPsynF/blw/Neb-cGP/ATPsynCF6/UQCR-14/sun/COX5A/COX5B/COX7C/Tim8/ND-B14.7/ND-30/QIL1/ND-MLRQ/UQCR-6.4/ND-13A/SdhC/RFeSP/ATPsynB/COX4/Cyt-c1/CG6878/COX6B/ATPsyndelta/CG5903/UQCR-C2/ATPsynE/levy/ND-ACP/ATPsyngamma/ND-B12/ATPsynbeta/COX7A/ND-51/ND-39/ND-B14.5A/ox/CG11752/ATPsynC/ND-20/ND-B14/ND-B14.5B/ATPsynD/ATPsynG/ND-15/ATPsynO/ND-B15/ND-PDSW/UQCR-C1/ND-MWFE/ND-B16.6/ND-19/ND-ASHI/ND-…	79
Female.marker.genes	GO:0005516	calmodulin binding	20/2020	36/12127	1.19073e-07	1.62901e-06	1.11206e-06	PhKgamma/igl/Nos/CanB2/SK/CanA-14F/KCNQ/Pde1c/CanB/Ric/rdgC/Vha100-1/Lk6/didum/CaMKII/jar/unc-13/Camta/ninaC/Pp2B-14D	20		Male.marker.genes	GO:0048675	axon extension	33/2449	54/12275	4.01528e-11	4.76877e-10	2.35856e-10	hdc/Lar/CadN/Nrg/shot/CadN2/Sema1a/Frl/fz2/stan/dnc/Mbs/kuz/tai/Dscam1/DAAM/Rac1/Ank2/spri/RhoGAP100F/trio/bif/chic/fz/Sh/hep/Ptpmeg/Hr51/rut/Liprin-alpha/bsk/Vang/Sema2a	33		Female.marker.genes	GO:0098803	respiratory chain complex	55/2074	88/11938	3.48683e-21	1.46156e-19	8.31945e-20	UQCR-Q/cype/UQCR-14/COX5A/COX5B/COX8/COX7C/ND-B14.7/ND-30/ND-MLRQ/UQCR-6.4/ND-13A/SdhC/RFeSP/COX4/Cyt-c1/COX6B/UQCR-C2/levy/ND-ACP/ND-B12/COX7A/ND-51/ND-39/ND-B14.5A/ox/CG11752/ND-20/ND-B14/ND-B14.5B/ND-15/ND-B15/ND-PDSW/UQCR-C1/ND-MWFE/ND-B16.6/ND-19/ND-ASHI/ND-24/ND-SGDH/SdhB/ND-23/ND-13B/ND-B18/UQCR-11/NP15.6/ND-B22/ND-18/ND-B17.2/ND-42/SdhD/ND-AGGG/ND-B17/ND-75/ND-49	55
Female.marker.genes	GO:0042803	protein homodimerization activity	49/2020	141/12127	1.22593e-07	1.64223e-06	1.12108e-06	Sod1/Tpi/ctp/CadN/drl/bru3/Ten-m/CadN2/corto/Ace/Ten-a/Syt1/trx/Dscam1/otk/pnut/14-3-3zeta/bun/FoxP/mim/rdx/da/ari-1/Sep1/rpr/robo2/Liprin-gamma/alien/Lac/Sep2/trsn/otk2/grim/mirr/CtBP/MBD-like/Gyc88E/psq/inc/svp/oc/per/Trxr-1/Taf12/Khc-73/Camta/REPTOR-BP/Pak3/Gsc	49		Male.marker.genes	GO:0016055	Wnt signaling pathway	55/2449	118/12275	5.13645e-11	6.07533e-10	3.00476e-10	tsh/Wnt4/Mmp2/wls/Cow/Bili/nkd/drl/Galphao/fz2/Diap1/Pp1-87B/dlp/SoxN/Prosap/pan/arr/flw/Drl-2/spen/nmo/dally/crol/ttv/otk/phyl/Dyrk2/sfl/Apc/Flo2/Hipk/gish/Ssdp/skd/nej/osa/gro/lgs/fz/Roc1a/CtBP/arm/wts/dco/Sin3A/Sulf1/SkpA/aop/Rho1/Wnt10/CG17278/Axn/CkIalpha/apolpp/TER94	55		Female.marker.genes	GO:0070469	respiratory chain	55/2074	89/11938	7.60367e-21	2.94203e-19	1.67465e-19	UQCR-Q/cype/UQCR-14/COX5A/COX5B/COX8/COX7C/ND-B14.7/ND-30/ND-MLRQ/UQCR-6.4/ND-13A/SdhC/RFeSP/COX4/Cyt-c1/COX6B/UQCR-C2/levy/ND-ACP/ND-B12/COX7A/ND-51/ND-39/ND-B14.5A/ox/CG11752/ND-20/ND-B14/ND-B14.5B/ND-15/ND-B15/ND-PDSW/UQCR-C1/ND-MWFE/ND-B16.6/ND-19/ND-ASHI/ND-24/ND-SGDH/SdhB/ND-23/ND-13B/ND-B18/UQCR-11/NP15.6/ND-B22/ND-18/ND-B17.2/ND-42/SdhD/ND-AGGG/ND-B17/ND-75/ND-49	55
Female.marker.genes	GO:0019829	cation-transporting ATPase activity	28/2020	62/12127	1.35572e-07	1.77904e-06	1.21447e-06	nrv3/blw/sun/Atpalpha/ATPsynB/Vha26/ATPsyndelta/Vha55/Vha44/ATPsynE/SPoCk/ATPsyngamma/ATPsynbeta/nrv2/VhaAC45/Vha16-1/rdgB/PMCA/Vha36-1/Vha100-1/VhaM9.7-b/CG31030/ATPsynC/Vha13/ATPsynD/Vha68-1/ATPsynG/ATPsynO	28		Male.marker.genes	GO:0007264	small GTPase mediated signal transduction	73/2449	177/12275	5.66807e-11	6.67676e-10	3.30222e-10	14-3-3zeta/Gdi/Rab3/14-3-3epsilon/CG43658/RapGAP1/RabX4/Rab11/Efa6/PlexA/Cdep/rin/GEFmeso/smt3/Pp1-87B/CRMP/Rheb/CG8500/Rgk3/Exn/Rala/mbc/rad/CG42684/siz/sty/RhoGDI/Ziz/Epac/Rac1/C3G/spg/CG42674/spri/PDZ-GEF/RhoGAP100F/trio/RhoGAP19D/RhoGAP71E/Rgk2/Ric/Rgk1/sif/Rab6/RhoBTB/RhoGEF3/PsGEF/Zir/PlexB/Rab26/Sur-8/Rab14/RhoGAPp190/cv-c/Rab27/Rgl/Rab35/Rab21/Cka/Rab4/Mob4/strat/Rho1/Graf/pns/Rab40/CG343…	73		Female.marker.genes	GO:0005746	mitochondrial respiratory chain	54/2074	88/11938	2.76376e-20	9.92979e-19	5.6522e-19	UQCR-Q/cype/UQCR-14/COX5A/COX5B/COX7C/ND-B14.7/ND-30/ND-MLRQ/UQCR-6.4/ND-13A/SdhC/RFeSP/COX4/Cyt-c1/COX6B/UQCR-C2/levy/ND-ACP/ND-B12/COX7A/ND-51/ND-39/ND-B14.5A/ox/CG11752/ND-20/ND-B14/ND-B14.5B/ND-15/ND-B15/ND-PDSW/UQCR-C1/ND-MWFE/ND-B16.6/ND-19/ND-ASHI/ND-24/ND-SGDH/SdhB/ND-23/ND-13B/ND-B18/UQCR-11/NP15.6/ND-B22/ND-18/ND-B17.2/ND-42/SdhD/ND-AGGG/ND-B17/ND-75/ND-49	54
Female.marker.genes	GO:0003779	actin binding	41/2020	110/12127	1.48564e-07	1.91053e-06	1.30424e-06	Msp300/tsr/Spn/Akap200/Moe/Mical/pnut/cora/shi/mim/CLIP-190/CG8726/Svil/cib/Dys/CG15097/futsch/Unc-115a/chic/Tm1/capt/CG32264/sals/didum/bif/alpha-Spec/sn/jar/Arpc1/shot/capu/Arpc3A/spir/Arpc5/pod1/Arp2/Arpc2/beta-Spec/hts/CG12964/GMF	41		Male.marker.genes	GO:0060341	regulation of cellular localization	62/2449	141/12275	6.67785e-11	7.83426e-10	3.8747e-10	cpx/nemy/Rab3/sky/Akap200/Frq2/Rab11/tsu/Nrx-1/wls/pros/aPKC/Mtor/enc/GABA-B-R2/Sar1/smt3/sdt/mago/dlp/Ih/Syx1A/klar/Pka-C1/Dys/cac/crb/Fife/Exn/Syt12/rho/dally/Sik3/brat/Parp/Tnpo/NFAT/Syt4/mnb/Apc/Abl/rdx/gish/Rop/kis/CASK/BicD/Syt1/east/Mi-2/cnc/Nipped-B/wts/bic/Frq1/Cnx99A/tim/CG30423/twit/TER94/Lam/Sec16	62		Female.marker.genes	GO:0150034	distal axon	57/2074	98/11938	9.65434e-20	3.23742e-18	1.84279e-18	Cbp53E/nSyb/Lrp4/NetB/jeb/Trim9/Mical/sky/Snap25/mnb/Con/ena/Syx1A/orb2/Syt1/fra/chb/erm/Prosap/Fas2/kek6/gogo/prt/cpx/dlg1/Atg8a/metro/VAChT/trio/Lis-1/Magi/CLIP-190/Alk/robo1/Nrx-1/CASK/alphaSnap/gukh/Rab11/Syn/Vmat/pum/Ank2/Rab3-GEF/Rtnl1/Grip/g/jar/shot/stau/unc-13/CCKLR-17D1/Mob4/pod1/Pldn/Scamp/Rop	57
Female.marker.genes	GO:0004713	protein tyrosine kinase activity	19/2020	34/12127	2.18374e-07	2.75322e-06	1.8795e-06	Csk/Hipk/otk/Eph/Alk/InR/Src64B/Ret/Ddr/Ror/Pvr/Btk29A/Abl/CG3277/Ack-like/FER/ninaC/Src42A/Wee1	19		Male.marker.genes	GO:0032870	cellular response to hormone stimulus	57/2449	125/12275	6.80519e-11	7.95132e-10	3.93259e-10	DENR/PyK/Blimp-1/Nurf-38/Hr4/Eip75B/mAChR-A/Oatp74D/Tl/Rheb/br/tai/AdipoR/ftz-f1/DOR/EcR/Hr38/Sik3/Sirt1/Pdk1/poly/CycG/G9a/CG15537/mAChR-B/Dh44-R2/sima/Akt1/E(bx)/Roc1a/wrd/Dh44-R1/Utx/foxo/HDAC4/wdb/InR/SIFaR/SkpA/Pp2A-29B/rk/Gpb5/Lgr4/Ilp7/ImpL2/Pi3K21B/Myc/Hr39/Hydr2/Sik2/gce/Lpin/Dh44/Pa1/Thor/STUB1/dock	57		Female.marker.genes	GO:0044455	mitochondrial membrane part	87/2074	193/11938	1.97433e-19	6.20679e-18	3.53301e-18	UQCR-Q/cype/ATPsynF/blw/Neb-cGP/ATPsynCF6/UQCR-14/sun/COX5A/COX5B/COX7C/Tim8/ND-B14.7/ND-30/QIL1/ND-MLRQ/UQCR-6.4/ND-13A/SdhC/RFeSP/ATPsynB/COX4/Cyt-c1/CG6878/COX6B/ATPsyndelta/CG5903/UQCR-C2/ATPsynE/levy/ND-ACP/ATPsyngamma/ND-B12/ATPsynbeta/COX7A/Tom20/Mpcp2/Fis1/ND-51/CG5676/ND-39/ND-B14.5A/ox/CG11752/ATPsynC/ND-20/ND-B14/ND-B14.5B/ATPsynD/ATPsynG/ND-15/ATPsynO/ND-B15/ND-PDSW/UQCR-C1/ND-MWFE/ND…	87
Female.marker.genes	GO:0022853	active ion transmembrane transporter activity	28/2020	64/12127	3.07672e-07	3.7327e-06	2.54815e-06	nrv3/blw/sun/Atpalpha/ATPsynB/Vha26/ATPsyndelta/Vha55/Vha44/ATPsynE/SPoCk/ATPsyngamma/ATPsynbeta/nrv2/VhaAC45/Vha16-1/rdgB/PMCA/Vha36-1/Vha100-1/VhaM9.7-b/CG31030/ATPsynC/Vha13/ATPsynD/Vha68-1/ATPsynG/ATPsynO	28		Male.marker.genes	GO:0060627	regulation of vesicle-mediated transport	55/2449	119/12275	7.71551e-11	8.97862e-10	4.44068e-10	Rab3/pyd/RabX4/Rab11/PIP4K/Nrx-1/drpr/Chc/Tomosyn/GABA-B-R2/Sar1/mgl/sdt/CaBP1/Syx1A/norpA/numb/Fife/cindr/Syt12/Gprk2/brat/Sytbeta/NFAT/Pkc53E/Syt4/mnb/spri/Cortactin/gish/Cadps/Moe/Smurf/corn/mim/Rab26/CASK/BicD/Syt1/Nedd4/nsl1/Syt7/comm/Rab27/scrib/Rab4/neur/tim/prtp/O-fut1/Graf/Nak/crq/Syx7/Sec16	55		Female.marker.genes	GO:0015934	large ribosomal subunit	60/2074	108/11938	2.42778e-19	7.18338e-18	4.0889e-18	RpLP0/RpL12/RpL15/RpL36/mRpL28/RpL23/mRpL14/mRpL15/RpL26/RpL28/RpL41/RpL27A/RpL32/RpL23A/RpL8/RpL37A/RpL24-like/RpL5/RpL19/RpLP2/mRpL27/mRpL24/mRpL47/mRpL52/mRpL2/mRpL12/RpL40/RpL35/RpL38/RpL18A/mRpL21/mRpL19/mRpL41/mRpL13/mRpL1/RpL34a/RpL36A/mRpL37/mRpL17/mRpS30/RpL34b/RpL17/RpL39/RpL30/RpL10/RpL6/RpL18/RpL10Ab/RpL7/RpL14/RpL21/RpL7A/RpLP1/RpL27/mRpL44/mRpL40/mRpL30/RpL13/mRpL46/RpL13A	60
Female.marker.genes	GO:0042625	ATPase coupled ion transmembrane transporter activity	28/2020	64/12127	3.07672e-07	3.7327e-06	2.54815e-06	nrv3/blw/sun/Atpalpha/ATPsynB/Vha26/ATPsyndelta/Vha55/Vha44/ATPsynE/SPoCk/ATPsyngamma/ATPsynbeta/nrv2/VhaAC45/Vha16-1/rdgB/PMCA/Vha36-1/Vha100-1/VhaM9.7-b/CG31030/ATPsynC/Vha13/ATPsynD/Vha68-1/ATPsynG/ATPsynO	28		Male.marker.genes	GO:0045892	negative regulation of transcription, DNA-templated	134/2449	401/12275	8.3455e-11	9.59567e-10	4.74586e-10	abd-A/Ubx/tsh/Antp/dsx/Blimp-1/zfh2/salr/Ssb-c31a/Lim1/bi/ct/Hsc70-4/Hr4/emc/Eip78C/Eip75B/Su(var)205/l(3)neo38/vig2/Tlk/pros/Pdcd4/sbb/Sox102F/CG12384/r2d2/HP1c/CG43689/gpp/pan/Gug/bin3/scrt/D/CG9932/CG12605/erm/jim/fs(1)h/corto/Dsp1/AGO1/Smr/Hr3/crol/lolal/JIL-1/chn/cic/Mad/EcR/Sirt1/Psc/Su(z)2/jing/CG8036/rhea/pum/upSET/shn/CG43347/Oamb/TfAP-2/simj/kis/gro/CG8677/drm/odd/mid/hb/MBD-like/ab/Opt…	134		Female.marker.genes	GO:0044429	mitochondrial part	162/2074	480/11938	5.99002e-19	1.67388e-17	9.52798e-18	sesB/Cyt-c-p/P5CDh1/GC1/UQCR-Q/slgA/cype/ATPsynF/blw/Neb-cGP/ATPsynCF6/porin/UQCR-14/sun/COX5A/COX5B/CG11267/tko/COX7C/Tim8/kdn/ND-B14.7/ND-30/QIL1/Sod2/IscU/ND-MLRQ/UQCR-6.4/ND-13A/SdhC/RFeSP/ATPsynB/COX4/Cyt-c1/CG6878/COX6B/Gabat/ATPsyndelta/CG5903/UQCR-C2/ATPsynE/levy/ND-ACP/ATPsyngamma/ND-B12/ATPsynbeta/COX7A/CG5059/Tom20/rpr/Mpcp2/mRpL28/scu/Fis1/Gdh/Hsc70-4/CG31075/ND-51/CG5676/ND-39/mRpS10…	162
Female.marker.genes	GO:0019899	enzyme binding	122/2020	479/12127	3.75242e-07	4.46816e-06	3.05021e-06	Blimp-1/Msp300/Gdi/CG42673/drl/smt3/Efa6/plx/CG7369/Fife/CG43658/CG42674/csw/nej/pico/sif/CG32506/nuf/mbc/Evi5/pan/trx/AGO1/Smr/CG5110/pnut/Atg17/siz/Tomosyn/Ubi-p5E/CycG/Atg8a/CG17514/btsz/trio/Rgl/ckn/Magi/lwr/Mob2/Su(Tpl)/rdx/RhoGDI/syd/Cks85A/PPP1R15/Aplip1/ari-1/Sep1/rpr/Sec61beta/Vha100-1/Diap1/Zir/MYPT-75D/Nrx-1/crb/alc/Mbs/CG10283/futsch/hid/CG13551/Lk6/Nop17l/Exn/spg/CG40228/CG3226/Fs(2)…	122		Male.marker.genes	GO:1902679	negative regulation of RNA biosynthetic process	134/2449	401/12275	8.3455e-11	9.59567e-10	4.74586e-10	abd-A/Ubx/tsh/Antp/dsx/Blimp-1/zfh2/salr/Ssb-c31a/Lim1/bi/ct/Hsc70-4/Hr4/emc/Eip78C/Eip75B/Su(var)205/l(3)neo38/vig2/Tlk/pros/Pdcd4/sbb/Sox102F/CG12384/r2d2/HP1c/CG43689/gpp/pan/Gug/bin3/scrt/D/CG9932/CG12605/erm/jim/fs(1)h/corto/Dsp1/AGO1/Smr/Hr3/crol/lolal/JIL-1/chn/cic/Mad/EcR/Sirt1/Psc/Su(z)2/jing/CG8036/rhea/pum/upSET/shn/CG43347/Oamb/TfAP-2/simj/kis/gro/CG8677/drm/odd/mid/hb/MBD-like/ab/Opt…	134		Female.marker.genes	GO:0033267	axon part	57/2074	103/11938	2.47386e-18	6.54922e-17	3.72793e-17	Cbp53E/nSyb/Lrp4/NetB/jeb/Trim9/Mical/sky/Snap25/mnb/Con/ena/Syx1A/orb2/Syt1/fra/chb/erm/Prosap/Fas2/kek6/gogo/prt/cpx/dlg1/Atg8a/metro/VAChT/trio/Lis-1/Magi/CLIP-190/Alk/robo1/Nrx-1/CASK/alphaSnap/gukh/Rab11/Syn/Vmat/pum/Ank2/Rab3-GEF/Rtnl1/Grip/g/jar/shot/stau/unc-13/CCKLR-17D1/Mob4/pod1/Pldn/Scamp/Rop	57
Female.marker.genes	GO:0035326	enhancer binding	19/2020	35/12127	4.03198e-07	4.71376e-06	3.21787e-06	hth/sd/pan/Mad/Mef2/ey/Antp/vvl/CrebA/hb/aop/pho/tup/Abd-B/abd-A/Ubx/en/exd/sv	19		Male.marker.genes	GO:1903507	negative regulation of nucleic acid-templated transcription	134/2449	401/12275	8.3455e-11	9.59567e-10	4.74586e-10	abd-A/Ubx/tsh/Antp/dsx/Blimp-1/zfh2/salr/Ssb-c31a/Lim1/bi/ct/Hsc70-4/Hr4/emc/Eip78C/Eip75B/Su(var)205/l(3)neo38/vig2/Tlk/pros/Pdcd4/sbb/Sox102F/CG12384/r2d2/HP1c/CG43689/gpp/pan/Gug/bin3/scrt/D/CG9932/CG12605/erm/jim/fs(1)h/corto/Dsp1/AGO1/Smr/Hr3/crol/lolal/JIL-1/chn/cic/Mad/EcR/Sirt1/Psc/Su(z)2/jing/CG8036/rhea/pum/upSET/shn/CG43347/Oamb/TfAP-2/simj/kis/gro/CG8677/drm/odd/mid/hb/MBD-like/ab/Opt…	134		Female.marker.genes	GO:0022625	cytosolic large ribosomal subunit	40/2074	58/11938	4.85876e-18	1.22198e-16	6.9557e-17	RpLP0/RpL12/RpL15/RpL36/RpL23/RpL26/RpL28/RpL41/RpL27A/RpL32/RpL23A/RpL8/RpL37A/RpL24-like/RpL5/RpL19/RpLP2/RpL40/RpL35/RpL38/RpL18A/mRpL1/RpL34a/RpL36A/RpL34b/RpL17/RpL39/RpL30/RpL10/RpL6/RpL18/RpL10Ab/RpL7/RpL14/RpL21/RpL7A/RpLP1/RpL27/RpL13/RpL13A	40
Female.marker.genes	GO:0003690	double-stranded DNA binding	103/2020	391/12127	5.72648e-07	6.57522e-06	4.48861e-06	Blimp-1/salr/hth/zfh2/Lim1/ap/ftz-f1/scro/ct/toy/Su(var)205/Hr4/HmgD/Xbp1/bi/Hr38/kay/NK7.1/CG12605/Trf2/sd/Atf3/CG32767/Xrp1/CG9932/cic/pan/Hr3/Eip75B/Mad/Mef2/ey/Hr51/Dif/NFAT/CG10543/Pur-alpha/Mnn1/da/Antp/grn/vvl/br/sqd/nonA/CG43689/disco/dmrt99B/lilli/bab1/bab2/D1/EcR/TfAP-2/CrebA/dve/fkh/Ptx1/sim/rn/Sidpn/PHDP/Awh/hb/Lim3/Pdp1/CG18599/Optix/Rx/CG32532/zfh1/aop/pho/MESR3/Hers/Stat92E/Drgx/tu…	103		Male.marker.genes	GO:0009880	embryonic pattern specification	89/2449	234/12275	8.57293e-11	9.78186e-10	4.83795e-10	hth/Ubx/Abd-B/tsh/Antp/Rab11/tsu/CSN5/rump/Hsp83/wls/aPKC/Cow/Chc/nkd/enc/Dg/Tl/fz2/mago/SmD3/lost/dlp/stan/SoxN/Syx1A/klar/Pka-C1/pan/Gug/lilli/arr/D/orb/tud/fs(1)h/dally/AGO1/cic/Mad/Hrb27C/jing/spir/pum/sfl/sqd/Apc/rdx/Moe/Tm1/Rop/Ssdp/kis/glo/lgs/drm/odd/chic/hb/fz/Rab6/dlg1/Stat92E/Syt1/csw/RasGAP1/cnc/arm/psq/scrib/bic/cni/run/stck/oc/shg/wun/croc/baz/Myc/apt/Pat1/en/capu/kn/Axn/TER94/tio/d…	89		Female.marker.genes	GO:0019866	organelle inner membrane	97/2074	254/11938	1.37072e-15	3.28321e-14	1.86885e-14	sesB/Cyt-c-p/GC1/UQCR-Q/cype/ATPsynF/blw/Neb-cGP/ATPsynCF6/UQCR-14/sun/COX5A/COX5B/COX7C/Tim8/ND-B14.7/ND-30/QIL1/ND-MLRQ/UQCR-6.4/ND-13A/SdhC/RFeSP/ATPsynB/COX4/Cyt-c1/CG6878/COX6B/ATPsyndelta/CG5903/UQCR-C2/ATPsynE/levy/ND-ACP/ATPsyngamma/ND-B12/ATPsynbeta/COX7A/Sirt1/Mpcp2/schlank/Hsc70-4/ND-51/ND-39/Scox/kuk/ND-B14.5A/ox/CG11752/ATPsynC/ND-20/ND-B14/ND-B14.5B/ATPsynD/ATPsynG/ND-15/ATPsynO/ND-…	97
Female.marker.genes	GO:0046933	proton-transporting ATP synthase activity, rotational mechanism	13/2020	19/12127	7.34514e-07	8.28583e-06	5.65636e-06	blw/sun/ATPsynB/ATPsyndelta/ATPsynE/ATPsyngamma/ATPsynbeta/VhaAC45/CG31030/ATPsynC/ATPsynD/ATPsynG/ATPsynO	13		Male.marker.genes	GO:0051270	regulation of cellular component movement	53/2449	113/12275	8.57523e-11	9.78186e-10	4.83795e-10	Pvf3/Lar/CadN/PlexA/zip/fra/sli/Sema1a/robo1/Diap1/stan/Rheb/kuz/puc/tai/mbc/Dscam1/Evi5/CG34401/kay/Hrb27C/ena/vn/Rac1/NetB/Apc/spri/robo2/kis/sima/chic/bnl/fz/hep/PlexB/Ptpmeg/Hr51/CG44774/Rab35/Sin3A/aop/shg/Pvr/Rho1/CG9784/Liprin-alpha/bsk/Pat1/Vang/ple/Sema2a/spi/Rab1	53		Female.marker.genes	GO:0005743	mitochondrial inner membrane	94/2074	244/11938	1.99809e-15	4.56835e-14	2.60038e-14	sesB/Cyt-c-p/GC1/UQCR-Q/cype/ATPsynF/blw/Neb-cGP/ATPsynCF6/UQCR-14/sun/COX5A/COX5B/COX7C/Tim8/ND-B14.7/ND-30/QIL1/ND-MLRQ/UQCR-6.4/ND-13A/SdhC/RFeSP/ATPsynB/COX4/Cyt-c1/CG6878/COX6B/ATPsyndelta/CG5903/UQCR-C2/ATPsynE/levy/ND-ACP/ATPsyngamma/ND-B12/ATPsynbeta/COX7A/Mpcp2/Hsc70-4/ND-51/ND-39/Scox/ND-B14.5A/ox/CG11752/ATPsynC/ND-20/ND-B14/ND-B14.5B/ATPsynD/ATPsynG/ND-15/ATPsynO/ND-B15/ND-PDSW/UQCR-C…	94
Female.marker.genes	GO:0016773	phosphotransferase activity, alcohol group as acceptor	89/2020	327/12127	7.57309e-07	8.39568e-06	5.73136e-06	PyK/PhKgamma/nmo/PKD/CG34384/cdi/JIL-1/wit/rdgA/bma/Hex-A/mnb/Gprk2/Gk2/Csk/CG2201/Hipk/CG31140/Sik3/put/Drak/Dyrk2/Dgk/fwd/Pdk1/CG4629/CG32944/otk/CG31145/eas/Pka-C3/Pka-C1/Pkc53E/Pkc98E/Slob/CycG/gish/aPKC/trio/SRPK/Pitslre/wts/Asator/babo/Eph/Alk/InR/CASK/msn/alc/Eip63E/Src64B/Lk6/Ret/Ddr/Ror/hppy/Pvr/Btk29A/Pdxk/sff/CaMKII/Strn-Mlck/Haspin/Abl/Dpck/Aduk/Gprk1/Sik2/Mkk4/Papss/grp/Dyrk3/CG3277/…	89		Male.marker.genes	GO:0007297	ovarian follicle cell migration	63/2449	145/12275	8.70745e-11	9.89359e-10	4.89321e-10	tsr/sosie/Lar/Rab11/sqh/zip/Lis-1/Dhc64C/stai/veli/Diap1/kuz/puc/kug/tai/Socs36E/cindr/Rala/mbc/Evi5/EcR/kay/Hrb27C/ena/jing/vn/Rac1/rhea/sqd/spri/Cortactin/18w/yki/kis/bun/ab/fz/hep/mim/CASK/Stat92E/Ptpmeg/Ppcs/Dl/Ptpmeg2/shi/wts/rk/aop/shg/Pvr/Rho1/baz/Mrtf/apt/bsk/Vang/kibra/spi/twf/Rab7/dome/dop	63		Female.marker.genes	GO:0005840	ribosome	105/2074	287/11938	2.77547e-15	6.06984e-14	3.45505e-14	tko/RpLP0/RpL12/CG11835/RpS6/RpL15/RpL36/bic/RpS13/mRpL28/RpL23/RpS3A/sta/mRpS10/mRpS7/mRpL14/mRpL15/RpL26/RpL28/RpL41/RpS25/RpS27/RpS20/RpL27A/RpL32/RpS9/RpL23A/RpL8/RpL37A/RpL24-like/LTV1/RpL5/RpS15Aa/RpL19/RpLP2/mRpS22/mRpL27/mRpL24/CG12848/mRpL47/mRpL52/mRpL2/mRpL12/mRpS24/mRpS6/RpL40/RpS7/mRpS2/RpL35/mRpS33/RpS2/RpL38/RpL18A/mRpL21/mRpS21/mRpL19/bonsai/mRpL41/mRpL13/mRpL1/RpL34a/RpL36A/RpS23…	105
Female.marker.genes	GO:0004112	cyclic-nucleotide phosphodiesterase activity	9/2020	10/12127	8.2731e-07	8.86601e-06	6.05243e-06	Pde6/dnc/Pde1c/Pka-R2/Pka-R1/Pde9/Pde8/Pde11/PrBP	9		Male.marker.genes	GO:0051650	establishment of vesicle localization	49/2449	101/12275	9.84248e-11	1.11394e-09	5.50935e-10	gammaSnap1/sesB/cpx/Rab3/sky/nSyb/Chc/Lis-1/Tomosyn/GABA-B-R2/Sar1/Dhc64C/unc-13-4A/Nrx-IV/Syx1A/Syx6/Fife/Rim/Klp98A/Sytbeta/NFAT/Syt4/Cadps/Snap25/Rop/Syn/unc-13/Syx13/CASK/Blos1/unc-104/BicD/Syt1/Khc-73/Syt7/Rab27/shi/Snap24/Aplip1/Syngr/Drp1/Rph/alphaSnap/Liprin-alpha/X11L/Pldn/gammaSnap2/Syx7/Sec16	49		Female.marker.genes	GO:0044306	neuron projection terminus	43/2074	74/11938	3.34249e-15	7.00529e-14	3.98753e-14	Cbp53E/VGAT/nSyb/Lrp4/jeb/Mical/sky/Snap25/mnb/ena/Syx1A/orb2/Syt1/Prosap/Fas2/kek6/prt/cpx/dlg1/Atg8a/metro/VAChT/Magi/Alk/Nrx-1/CASK/alphaSnap/gukh/Rab11/Syn/Vmat/pum/Ank2/Rab3-GEF/Grip/g/stau/unc-13/CCKLR-17D1/Mob4/Pldn/Scamp/Rop	43
Female.marker.genes	GO:0022848	acetylcholine-gated cation-selective channel activity	9/2020	10/12127	8.2731e-07	8.86601e-06	6.05243e-06	nAChRalpha6/nAChRalpha5/nAChRalpha1/nAChRbeta1/nAChRalpha3/nAChRalpha7/nAChRalpha2/nAChRbeta2/nAChRalpha4	9		Male.marker.genes	GO:0042462	eye photoreceptor cell development	48/2449	98/12275	1.00008e-10	1.12744e-09	5.57612e-10	mbl/tsr/Lar/Rab11/CadN/Cam/tutl/Ten-m/EMC3/SP2353/CadN2/Lis-1/Nrk/stan/klar/Mbs/crb/lola/lilli/vimar/tinc/eys/Alk/sty/yrt/jeb/dysc/Rac1/tau/PDZ-GEF/Moe/RhoGAP100F/Dab/dac/Rab6/Mob2/csw/pAbp/AP-1sigma/neur/oc/p47/capt/Liprin-alpha/Amph/Afti/Syn2/msk	48		Female.marker.genes	GO:0015935	small ribosomal subunit	44/2074	77/11938	3.73895e-15	7.23344e-14	4.11739e-14	tko/RpS6/RpS13/RpS3A/sta/mRpS10/mRpS7/RpS25/RpS27/RpS20/RpS9/LTV1/RpS15Aa/mRpS22/mRpL12/mRpS24/mRpS6/RpL40/RpS7/mRpS2/mRpS33/RpS2/mRpS21/bonsai/RpS23/mRpS30/MCTS1/RpS27A/RpS11/RpS18/RpS8/RpS3/RpS12/RpS16/RpS15/RpS21/RpS17/RpS29/RpS24/mRpS35/RpS19a/mRpS14/RpS5a/Rack1	44
Female.marker.genes	GO:0005249	voltage-gated potassium channel activity	12/2020	17/12127	1.19979e-06	1.2647e-05	8.63353e-06	Shawl/eag/Sh/Shaw/KCNQ/SLO2/Elk/slo/Hk/Shab/Ih/Shal	12		Male.marker.genes	GO:0030707	ovarian follicle cell development	118/2449	342/12275	1.23217e-10	1.38368e-09	6.84345e-10	tsr/ct/sosie/Syp/Fas3/Lar/Hsc70-4/emc/Rab11/sqh/Fs(2)Ket/Prosalpha7/zip/rin/Lis-1/ed/Dhc64C/SERCA/stai/smt3/pigs/mam/veli/r2d2/Diap1/mats/br/S/kuz/puc/kug/tai/Src64B/Socs36E/cindr/bib/orb/Rala/mbc/Smr/Evi5/toc/cic/sty/Mad/EcR/kay/Hrb27C/Parp/ena/jing/spir/jvl/vn/Rac1/rhea/sqd/Apc/spri/Cortactin/18w/Mef2/yki/Rop/kis/nej/bun/Not1/kra/mid/ab/fz/hep/mim/CASK/dlg1/Stat92E/csw/Ptpmeg/Ppcs/Dl/cact/Ptpme…	118		Female.marker.genes	GO:0031594	neuromuscular junction	44/2074	77/11938	3.73895e-15	7.23344e-14	4.11739e-14	nwk/stai/dlp/Ten-m/sky/Fas3/Syp/Nlg2/Ten-a/Con/Neto/Syt1/Pdk1/Prosap/Fas2/Dg/cpx/dlg1/Tomosyn/scrib/brp/cact/Cip4/Magi/eIF4E1/Nrx-1/CASK/Exn/Smn/cac/Sdc/Syngr/Vmat/pum/Ank2/Rab3-GEF/Syt4/alpha-Spec/Grip/unc-13/pod1/Pldn/sgg/beta-Spec	44
Female.marker.genes	GO:0015079	potassium ion transmembrane transporter activity	26/2020	62/12127	2.16264e-06	2.24287e-05	1.53111e-05	nrv3/Atpalpha/kcc/CG42340/nrv2/GluRIA/Shawl/eag/CG42594/SK/Sh/CG1688/Shaw/KCNQ/SLO2/Elk/slo/Hk/Shab/Ih/Nckx30C/Task6/Shal/CG1090/CG43155/Nhe2	26		Male.marker.genes	GO:1901700	response to oxygen-containing compound	124/2449	365/12275	1.30113e-10	1.45545e-09	7.19841e-10	ND-SGDH/Idh3b/DENR/Drat/PyK/Blimp-1/Sod1/Bx/Bacc/Ggamma30A/klg/Nurf-38/Hr4/Akap200/Eip75B/Jwa/Cam/DopEcR/mAChR-A/Oatp74D/Tl/dpr9/Fas2/Nos/Tbh/Galphas/Rheb/CG14184/br/dnc/Pka-C1/S/eag/ftz-f1/DOR/rho/hid/EcR/Hr38/Sik3/Sirt1/Trf2/Pdk1/Galphaq/Ddc/Pde8/poly/Pka-R1/Ac78C/pum/CycG/Crtc/Sesn/ktub/G9a/sca/Dop1R1/Vrp1/mAChR-B/Sod2/sima/pxb/Akt1/Syn/kra/ND-20/rpr/Jafrac1/Gyc89Db/Sh/E(bx)/PHGPx/Roc1a/CG5412…	124		Female.marker.genes	GO:0043195	terminal bouton	40/2074	66/11938	4.15686e-15	7.74407e-14	4.40805e-14	Cbp53E/nSyb/jeb/Mical/sky/Snap25/mnb/ena/Syx1A/Syt1/Prosap/Fas2/kek6/prt/cpx/dlg1/Atg8a/metro/VAChT/Magi/Alk/Nrx-1/CASK/alphaSnap/gukh/Rab11/Syn/Vmat/pum/Ank2/Rab3-GEF/Grip/g/stau/unc-13/CCKLR-17D1/Mob4/Pldn/Scamp/Rop	40
Female.marker.genes	GO:0004672	protein kinase activity	72/2020	256/12127	2.37522e-06	2.42424e-05	1.65492e-05	PhKgamma/nmo/PKD/cdi/JIL-1/wit/bma/mnb/Gprk2/Csk/Hipk/Sik3/put/Drak/Dyrk2/Pdk1/CG4629/CG32944/otk/CG31145/Pka-C3/Pka-C1/Pkc53E/Pkc98E/Slob/CycG/gish/aPKC/trio/SRPK/Pitslre/wts/Asator/babo/Eph/Alk/InR/CASK/msn/alc/Eip63E/Src64B/Lk6/Ret/Ddr/Ror/hppy/Pvr/Btk29A/sff/CaMKII/Strn-Mlck/Haspin/Abl/Aduk/Gprk1/Sik2/Mkk4/grp/Dyrk3/CG3277/Ack-like/aurB/FER/sgg/ninaC/Src42A/Cdk5/Tlk/Wee1/Pak3/CkIIbeta	72		Male.marker.genes	GO:0015980	energy derivation by oxidation of organic compounds	68/2449	163/12275	1.40977e-10	1.57089e-09	7.76935e-10	ND-SGDH/Idh3b/ND-42/ND-ASHI/ND-B14.5B/ND-15/kdn/SdhB/SdhC/Cyt-c1/ND-19/UQCR-C2/ND-B12/ND-PDSW/UQCR-C1/COX5A/COX4/UQCR-14/CG14757/Mdh1/UQCR-Q/cype/COX5B/UQCR-6.4/ND-13A/COX7C/Nc73EF/COX7A/EcR/GC1/levy/RFeSP/ND-MLRQ/ND-39/ND-B15/CG5214/ND-B17.2/ND-B14/Atg1/Atg17/ND-23/Mdh2/SdhA/ND-75/ND-B18/ND-51/ox/CG7430/ND-24/ND-ACP/ND-20/ND-B16.6/SdhD/ND-13B/ND-49/ND-B22/PhKgamma/ND-B14.5A/foxo/dj-1beta/Atg6/Si…	68		Female.marker.genes	GO:0098590	plasma membrane region	111/2074	314/11938	7.05148e-15	1.26675e-13	7.21054e-14	Atpalpha/Lrp4/Tob/nAChRalpha6/sdt/dpr5/nAChRalpha5/dpr13/Lar/dpr8/dpr18/Pde6/dpr20/hbs/dpr15/Shawl/Ten-m/dpr14/Flo1/dpr4/Moe/sosie/kek1/Fife/Fas3/Rdl/dpr9/nAChRalpha1/Nlg2/Ten-a/dpr6/Syx1A/dpr10/inaE/orb2/dpr12/Shaw/nuf/Prosap/Fas2/dally/DIP-gamma/Dg/pnut/cv-c/a/dlg1/scrib/brp/shi/slo/Drep2/aPKC/nAChRbeta1/btsz/Cip4/Magi/Lrch/mgl/Ca-alpha1D/lap/nAChRalpha3/nAChRalpha7/dpr17/dpr2/dpr3/kug/Nrx-1/dp…	111
Female.marker.genes	GO:0044769	ATPase activity, coupled to transmembrane movement of ions, rotational mechanism	22/2020	49/12127	3.34467e-06	3.36035e-05	2.29396e-05	blw/sun/ATPsynB/Vha26/ATPsyndelta/Vha55/Vha44/ATPsynE/ATPsyngamma/ATPsynbeta/VhaAC45/Vha16-1/Vha36-1/Vha100-1/VhaM9.7-b/CG31030/ATPsynC/Vha13/ATPsynD/Vha68-1/ATPsynG/ATPsynO	22		Male.marker.genes	GO:0035222	wing disc pattern formation	42/2449	81/12275	1.48565e-10	1.64907e-09	8.15604e-10	gammaSnap1/tsh/bi/ap/14-3-3epsilon/put/nmd/Nipped-A/Cow/drpr/Hs3st-B/sbb/dlp/crb/lilli/nuf/CG1943/CG5890/spen/nmo/dally/cic/Mad/tara/shn/Mpcp2/skd/osa/sno/Su(Tpl)/CG14073/H/Dl/Sulf1/cbt/capt/inv/en/vg/pnt/tkv/Rab7	42		Female.marker.genes	GO:0043679	axon terminus	42/2074	73/11938	1.13859e-14	1.97487e-13	1.12413e-13	Cbp53E/nSyb/Lrp4/jeb/Mical/sky/Snap25/mnb/ena/Syx1A/orb2/Syt1/Prosap/Fas2/kek6/prt/cpx/dlg1/Atg8a/metro/VAChT/Magi/Alk/Nrx-1/CASK/alphaSnap/gukh/Rab11/Syn/Vmat/pum/Ank2/Rab3-GEF/Grip/g/stau/unc-13/CCKLR-17D1/Mob4/Pldn/Scamp/Rop	42
Female.marker.genes	GO:0005267	potassium channel activity	19/2020	39/12127	3.47759e-06	3.44014e-05	2.34843e-05	CG42340/GluRIA/Shawl/eag/CG42594/SK/Sh/CG1688/Shaw/KCNQ/SLO2/Elk/slo/Hk/Shab/Ih/Task6/Shal/CG43155	19		Male.marker.genes	GO:0002066	columnar/cuboidal epithelial cell development	118/2449	343/12275	1.51709e-10	1.67752e-09	8.29672e-10	tsr/ct/sosie/Syp/Fas3/Lar/Hsc70-4/emc/Rab11/sqh/Fs(2)Ket/Prosalpha7/zip/rin/Lis-1/ed/Dhc64C/SERCA/stai/smt3/pigs/mam/veli/r2d2/Diap1/mats/br/S/kuz/puc/kug/tai/Src64B/Socs36E/cindr/bib/orb/Rala/mbc/Smr/Evi5/toc/cic/sty/Mad/EcR/kay/Hrb27C/Parp/ena/jing/spir/jvl/vn/Rac1/rhea/sqd/Apc/spri/Cortactin/18w/Mef2/yki/Rop/kis/nej/bun/Not1/kra/mid/ab/fz/hep/mim/CASK/dlg1/Stat92E/csw/Ptpmeg/Ppcs/Dl/cact/Ptpme…	118		Female.marker.genes	GO:1990204	oxidoreductase complex	51/2074	100/11938	1.31914e-14	2.21176e-13	1.25897e-13	UQCR-Q/UQCR-14/ND-B14.7/ND-30/ND-MLRQ/UQCR-6.4/ND-13A/SdhC/RFeSP/Cyt-c1/UQCR-C2/ND-ACP/ND-B12/ND-51/ND-39/ND-B14.5A/ox/CG11752/Duox/ND-20/ND-B14/ND-B14.5B/ND-15/ND-B15/ND-PDSW/UQCR-C1/ND-MWFE/ND-B16.6/ND-19/ND-ASHI/ND-24/ND-SGDH/CG7834/SdhB/ND-23/ND-13B/ND-B18/UQCR-11/NP15.6/ND-B22/muc/ND-18/ND-B17.2/CG5214/ND-42/SdhD/ND-AGGG/ND-B17/CG17691/ND-75/ND-49	51
Female.marker.genes	GO:0008266	poly(U) RNA binding	9/2020	11/12127	3.87176e-06	3.77203e-05	2.575e-05	fne/Rbp6/shep/Sxl/Hrb27C/elav/pAbp/ssx/CG4612	9		Male.marker.genes	GO:0006887	exocytosis	48/2449	99/12275	1.56881e-10	1.72809e-09	8.54684e-10	gammaSnap1/Scp2/cpx/Rab3/RabX4/Rab11/nSyb/Chc/Tomosyn/GABA-B-R2/unc-13-4A/Nrx-IV/CG10098/Syx1A/cac/Syx6/Fife/Syt12/Rim/CG31475/Sytbeta/NFAT/Syt4/Cadps/Snap25/jagn/Rop/Syn/Rab6/unc-13/corn/Rab26/Syx13/CASK/BicD/Syt1/Syt7/Rab27/Snap24/Rab35/Syngr/Rph/alphaSnap/Amph/X11L/gammaSnap2/Rab7/Syx7	48		Female.marker.genes	GO:0099503	secretory vesicle	46/2074	85/11938	1.45099e-14	2.35435e-13	1.34014e-13	unc-13-4A/VGAT/fwe/nSyb/Gdi/Sytbeta/Rab3/VGlut/cmpy/jeb/Tbh/CanB2/Frq2/Rim/Syx1A/Syt1/olf413/prt/Dop1R2/CanB/Tomosyn/Rab27/7B2/Snap24/lap/Vha100-1/Atet/Syt12/RabX4/Rab11/Clc/Syn/Rph/Syngr/Syt7/Vmat/Rab35/Rab3-GEF/Cirl/Syt4/Cadps/unc-13/Syx6/Esyt2/Scamp/Eps-15	46
Female.marker.genes	GO:0015078	proton transmembrane transporter activity	38/2020	111/12127	4.68522e-06	4.49641e-05	3.0695e-05	cype/blw/ATPsynCF6/VGAT/sun/COX5A/COX5B/COX8/COX7C/ND-MLRQ/ATPsynB/COX4/Vha26/COX6B/ATPsyndelta/Vha55/Vha44/ATPsynE/SPoCk/levy/ATPsyngamma/ATPsynbeta/COX7A/VhaAC45/Vha16-1/Vha36-1/Vha100-1/VhaM9.7-b/CG31030/ATPsynC/VhaM9.7-a/Vha13/ATPsynD/Vha68-1/ATPsynG/ATPsynO/CG10960/Nhe2	38		Male.marker.genes	GO:1902903	regulation of supramolecular fiber organization	47/2449	96/12275	1.59487e-10	1.75011e-09	8.65578e-10	Btk29A/nwk/chinmo/CG43658/Arpc5/futsch/shot/svr/Jupiter/Arpc4/Arpc3A/Arpc1/IRSp53/Src64B/ena/spir/DAAM/Apc/Abl/Cortactin/gish/Vrp1/chb/tacc/Kank/chic/fz/RhoBTB/PsGEF/hep/Nedd4/shi/Cip4/dco/sals/Arpc2/Arp3/capu/tmod/hts/Rack1/CG1674/twf/alpha-Spec/Vhl/Lam/CG6891	47		Female.marker.genes	GO:0097060	synaptic membrane	39/2074	66/11938	3.00611e-14	4.72523e-13	2.68968e-13	Lrp4/Tob/nAChRalpha6/nAChRalpha5/Ten-m/Fife/nAChRalpha1/Nlg2/Ten-a/Syx1A/inaE/orb2/Prosap/Fas2/dlg1/scrib/brp/shi/slo/Drep2/nAChRbeta1/lap/nAChRalpha3/nAChRalpha7/Nrx-1/Cals/gukh/Exn/nAChRalpha2/nAChRbeta2/veli/Nmdar1/DAT/Ank2/CaMKII/nAChRalpha4/Syt4/Grip/unc-13	39
Female.marker.genes	GO:0005543	phospholipid binding	37/2020	107/12127	4.76856e-06	4.50909e-05	3.07816e-05	nwk/Sytbeta/Efa6/Moe/Gprk2/qvr/Syt1/Klp98A/neur/rdgB/Cip4/mim/CG8726/lap/Graf/CG32758/rpr/IRSp53/CG6329/Syt12/baz/Rph/EndoB/Syt7/cert/Gprk1/Amph/Pcyt1/Syt4/drpr/unc-13/Esyt2/AnxB11/AnxB10/FER/beta-Spec/ninaC	37		Male.marker.genes	GO:0042051	compound eye photoreceptor development	46/2449	93/12275	1.60696e-10	1.7567e-09	8.68837e-10	mbl/tsr/Lar/Rab11/CadN/Cam/tutl/Ten-m/EMC3/SP2353/CadN2/Lis-1/Nrk/stan/klar/Mbs/crb/lola/lilli/vimar/eys/Alk/sty/jeb/dysc/Rac1/tau/PDZ-GEF/Moe/RhoGAP100F/Dab/dac/Rab6/Mob2/csw/pAbp/AP-1sigma/neur/oc/p47/capt/Liprin-alpha/Amph/Afti/Syn2/msk	46		Female.marker.genes	GO:0070382	exocytic vesicle	40/2074	69/11938	3.4509e-14	5.26e-13	2.99408e-13	unc-13-4A/VGAT/fwe/nSyb/Gdi/Sytbeta/Rab3/VGlut/jeb/CanB2/Frq2/Rim/Syx1A/Syt1/prt/Dop1R2/CanB/Tomosyn/Rab27/lap/Vha100-1/Atet/Syt12/RabX4/Clc/Syn/Rph/Syngr/Syt7/Vmat/Rab35/Rab3-GEF/Cirl/Syt4/Cadps/unc-13/Syx6/Esyt2/Scamp/Eps-15	40
Female.marker.genes	GO:0022839	ion gated channel activity	49/2020	158/12127	5.39659e-06	5.029e-05	3.43307e-05	porin/Nmdar2/nAChRalpha6/nAChRalpha5/GluClalpha/GluRIB/GluRIA/Shawl/pHCl-1/Ca-alpha1T/eag/SK/Rdl/Sh/Mid1/nAChRalpha1/CG3638/Shaw/KCNQ/Cngl/SLO2/Elk/CG42260/slo/nAChRbeta1/Trpm/Ca-alpha1D/Ca-beta/Hk/Shab/nAChRalpha3/nAChRalpha7/tty/CG4587/Ih/RyR/jp/nAChRalpha2/nAChRbeta2/cac/Nmdar1/GPHR/nAChRalpha4/CG15270/Shal/NaCP60E/stj/CG8916/Grd	49		Male.marker.genes	GO:0016199	axon midline choice point recognition	20/2449	25/12275	1.75317e-10	1.9093e-09	9.4431e-10	dsx/Trim9/PlexA/tutl/fra/shot/sli/Sema1a/robo1/drl/lola/Galphaq/Rac1/Abl/fru/kra/RhoGAP93B/Nedd4/comm/alpha-Spec	20		Female.marker.genes	GO:0005747	mitochondrial respiratory chain complex I	34/2074	53/11938	4.29178e-14	5.99658e-13	3.41335e-13	ND-B14.7/ND-30/ND-MLRQ/ND-13A/ND-ACP/ND-B12/ND-51/ND-39/ND-B14.5A/CG11752/ND-20/ND-B14/ND-B14.5B/ND-15/ND-B15/ND-PDSW/ND-MWFE/ND-B16.6/ND-19/ND-ASHI/ND-24/ND-SGDH/ND-23/ND-13B/ND-B18/NP15.6/ND-B22/ND-18/ND-B17.2/ND-42/ND-AGGG/ND-B17/ND-75/ND-49	34
Female.marker.genes	GO:0022836	gated channel activity	50/2020	163/12127	6.13029e-06	5.63111e-05	3.84411e-05	porin/Nmdar2/nAChRalpha6/nAChRalpha5/GluClalpha/GluRIB/GluRIA/Shawl/pHCl-1/Ca-alpha1T/eag/SK/Rdl/Sh/Mid1/nAChRalpha1/CG3638/Shaw/KCNQ/Cngl/SLO2/Elk/CG42260/slo/nAChRbeta1/Trpm/Ca-alpha1D/Ca-beta/Hk/Shab/nAChRalpha3/nAChRalpha7/tty/CG4587/Ih/RyR/jp/nAChRalpha2/nAChRbeta2/cac/Nmdar1/Trpgamma/GPHR/nAChRalpha4/CG15270/Shal/NaCP60E/stj/CG8916/Grd	50		Male.marker.genes	GO:0009894	regulation of catabolic process	84/2449	219/12275	1.77273e-10	1.92335e-09	9.51258e-10	sesB/CG6878/Sod1/Hsp67Bc/schlank/BI-1/CkIIalpha/CSN5/rump/Chc/Toll-7/Bruce/mask/Dg/Sec61alpha/Sec61beta/CG12384/Rheb/CSN4/eIF4A/Pka-C1/crb/CG4238/Socs36E/DOR/hid/bol/phyl/Smox/EcR/Sik3/Mitf/Fer2/Atg8a/pum/Apc/Sesn/CG33144/CG9705/CG3530/Sod2/Atg1/sima/Akt1/Smurf/rpr/hep/Roc1a/ctrip/Rpb7/Acn/Nedd4/Utx/foxo/CG31855/Oda/shi/wts/Rab21/dco/mbf1/Rad23/InR/Pax/SkpA/Traf6/Desat1/Drp1/Ubc6/CG13928/Myc/Sec6…	84		Female.marker.genes	GO:0030964	NADH dehydrogenase complex	34/2074	53/11938	4.29178e-14	5.99658e-13	3.41335e-13	ND-B14.7/ND-30/ND-MLRQ/ND-13A/ND-ACP/ND-B12/ND-51/ND-39/ND-B14.5A/CG11752/ND-20/ND-B14/ND-B14.5B/ND-15/ND-B15/ND-PDSW/ND-MWFE/ND-B16.6/ND-19/ND-ASHI/ND-24/ND-SGDH/ND-23/ND-13B/ND-B18/NP15.6/ND-B22/ND-18/ND-B17.2/ND-42/ND-AGGG/ND-B17/ND-75/ND-49	34
Female.marker.genes	GO:0050839	cell adhesion molecule binding	20/2020	44/12127	7.38481e-06	6.68793e-05	4.56555e-05	CG5758/CadN/stan/plx/CadN2/Gfrl/Nrg/Ccn/otk/siz/ed/kug/kirre/pyd/Ret/p120ctn/cindr/cno/arm/Fas1	20		Male.marker.genes	GO:0008154	actin polymerization or depolymerization	38/2449	70/12275	1.90845e-10	2.06285e-09	1.02025e-09	Btk29A/nwk/tsr/chinmo/Arpc5/SelR/svr/Arpc4/Arpc3A/Arpc1/IRSp53/Src64B/ena/spir/DAAM/Abl/Cortactin/gish/Vrp1/Kank/chic/RhoBTB/PsGEF/Mical/shi/Cip4/dco/capt/sals/Arpc2/Arp3/capu/tmod/hts/Rack1/twf/Lam/CG6891	38		Female.marker.genes	GO:0045271	respiratory chain complex I	34/2074	53/11938	4.29178e-14	5.99658e-13	3.41335e-13	ND-B14.7/ND-30/ND-MLRQ/ND-13A/ND-ACP/ND-B12/ND-51/ND-39/ND-B14.5A/CG11752/ND-20/ND-B14/ND-B14.5B/ND-15/ND-B15/ND-PDSW/ND-MWFE/ND-B16.6/ND-19/ND-ASHI/ND-24/ND-SGDH/ND-23/ND-13B/ND-B18/NP15.6/ND-B22/ND-18/ND-B17.2/ND-42/ND-AGGG/ND-B17/ND-75/ND-49	34
Female.marker.genes	GO:0046983	protein dimerization activity	98/2020	392/12127	1.22491e-05	0.000109391	7.46765e-05	Sod1/Tpi/ctp/CadN/drl/ftz-f1/bru3/Ten-m/tai/Oli/CadN2/kay/corto/Ace/Ten-a/Syt1/His3.3B/Drl-2/trx/REPTOR/Dscam1/otk/pnut/Mef2/14-3-3zeta/bun/FoxP/mim/sima/rdx/Sin3A/da/ari-1/His4r/Sep1/rpr/robo2/Liprin-gamma/emc/E2f1/HIP-R/GABA-B-R1/alien/Lac/Task6/14-3-3epsilon/Ggamma30A/Sep2/Taf13/trsn/EcR/Fer1/sim/Sidpn/gce/otk2/Bgb/grim/kn/Gpb5/Fer3/tim/mirr/Fer2/Mnt/CtBP/Irbp/MBD-like/Gyc88E/psq/Gyc89Db/bip2/…	98		Male.marker.genes	GO:0042067	establishment of ommatidial planar polarity	35/2449	62/12275	2.3386e-10	2.51835e-09	1.24554e-09	tsr/hbs/CadN/zip/fred/rin/CadN2/ed/Frl/stan/S/lola/Rala/nmo/sty/kay/rdx/gish/sca/caup/ara/nej/sano/fz/Dl/scrib/dco/mirr/aop/cno/shg/pnt/Vang/msk/spi	35		Female.marker.genes	GO:0031410	cytoplasmic vesicle	125/2074	380/11938	6.39557e-14	8.46572e-13	4.81882e-13	unc-13-4A/VGAT/CG32225/fwe/nSyb/Gdi/nwk/Sytbeta/Vha55/Rab3/VGlut/cmpy/fz2/jeb/Tbh/CanB2/hbs/CG34384/wit/S/Fas3/Frq2/Rim/Syx1A/w/Syt1/CG6051/nuf/Evi5/rho/olf413/CG5110/CG4080/Klp98A/Rab18/prt/Dop1R2/CanB/Tomosyn/neur/Rab27/7B2/comm/shi/Dl/fz/VAChT/ed/Snap24/AP-2sigma/Lamp1/Rab14/syd/lap/Graf/CG32758/Ndfip/Vha100-1/Sar1/CHOp24/bai/ergic53/Sap-r/aph-1/alphaSnap/Atet/RyR/Syt12/CG13784/Vps24/RabX4/Rab…	125
Female.marker.genes	GO:0000980	RNA polymerase II distal enhancer sequence-specific DNA binding	14/2020	26/12127	1.585e-05	0.000136809	9.33935e-05	sd/pan/Mad/ey/Antp/vvl/hb/aop/pho/tup/Abd-B/abd-A/Ubx/en	14		Male.marker.genes	GO:0048588	developmental cell growth	41/2449	79/12275	2.36815e-10	2.5407e-09	1.25659e-09	path/hdc/Lar/CadN/Nrg/shot/poe/CadN2/Sema1a/Frl/fz2/stan/dnc/Pka-C1/Mbs/kuz/eag/tai/Dscam1/kay/DAAM/Rac1/Ank2/spri/jagn/RhoGAP100F/trio/bif/chic/fz/Sh/hep/Ptpmeg/Hr51/rut/InR/Liprin-alpha/bsk/Vang/Sema2a/CG15019	41		Female.marker.genes	GO:0097708	intracellular vesicle	125/2074	380/11938	6.39557e-14	8.46572e-13	4.81882e-13	unc-13-4A/VGAT/CG32225/fwe/nSyb/Gdi/nwk/Sytbeta/Vha55/Rab3/VGlut/cmpy/fz2/jeb/Tbh/CanB2/hbs/CG34384/wit/S/Fas3/Frq2/Rim/Syx1A/w/Syt1/CG6051/nuf/Evi5/rho/olf413/CG5110/CG4080/Klp98A/Rab18/prt/Dop1R2/CanB/Tomosyn/neur/Rab27/7B2/comm/shi/Dl/fz/VAChT/ed/Snap24/AP-2sigma/Lamp1/Rab14/syd/lap/Graf/CG32758/Ndfip/Vha100-1/Sar1/CHOp24/bai/ergic53/Sap-r/aph-1/alphaSnap/Atet/RyR/Syt12/CG13784/Vps24/RabX4/Rab…	125
Female.marker.genes	GO:0008137	NADH dehydrogenase (ubiquinone) activity	13/2020	23/12127	1.59575e-05	0.000136809	9.33935e-05	ND-30/ND-51/ND-B14.5A/ND-20/ND-B14.5B/ND-B15/ND-B16.6/ND-ASHI/ND-B18/ND-18/ND-B17.2/ND-42/ND-75	13		Male.marker.genes	GO:0001700	embryonic development via the syncytial blastoderm	78/2449	199/12275	2.38723e-10	2.55168e-09	1.26202e-09	Btk29A/tsh/chrb/put/emc/pyd/Rab11/sqh/faf/zip/shot/ed/Sec61alpha/sns/Nrx-IV/lwr/Arpc1/msn/Mbs/crb/Eip63E/puc/Myo10A/rho/hid/mbc/lolal/chn/Mad/yrt/EcR/kay/ena/Rac1/sr/rhea/pum/Abl/kirre/shn/PDZ-GEF/Src42A/tup/grp/Dab/Smurf/chic/scyl/hep/dlg1/KCNQ/arm/cv-c/cora/scrib/bic/Cka/InR/cbt/raw/stck/oc/zfh1/mirr/aop/Traf6/cno/shg/Pvr/Rho1/Arp3/bsk/kn/tkv/sced/Nmt/Bx42/spi	78		Female.marker.genes	GO:0031966	mitochondrial membrane	104/2074	298/11938	1.32206e-13	1.66651e-12	9.48603e-13	sesB/Cyt-c-p/GC1/UQCR-Q/cype/ATPsynF/blw/Neb-cGP/ATPsynCF6/porin/UQCR-14/sun/COX5A/COX5B/COX7C/Tim8/ND-B14.7/ND-30/QIL1/ND-MLRQ/UQCR-6.4/ND-13A/SdhC/RFeSP/ATPsynB/COX4/Cyt-c1/CG6878/COX6B/ATPsyndelta/CG5903/UQCR-C2/ATPsynE/levy/ND-ACP/ATPsyngamma/ND-B12/ATPsynbeta/COX7A/CG5059/Tom20/rpr/Mpcp2/Fis1/Hsc70-4/ND-51/CG5676/ND-39/Scox/Tspo/ND-B14.5A/ox/CG11752/ATPsynC/ND-20/ND-B14/Mgstl/ND-B14.5B/ATPsy…	104
Female.marker.genes	GO:0050136	NADH dehydrogenase (quinone) activity	13/2020	23/12127	1.59575e-05	0.000136809	9.33935e-05	ND-30/ND-51/ND-B14.5A/ND-20/ND-B14.5B/ND-B15/ND-B16.6/ND-ASHI/ND-B18/ND-18/ND-B17.2/ND-42/ND-75	13		Male.marker.genes	GO:0007548	sex differentiation	48/2449	100/12275	2.43807e-10	2.59641e-09	1.28414e-09	Btk29A/abd-A/Abd-B/dsx/Wnt4/salr/tsr/ct/sli/Invadolysin/robo1/Fas2/fz2/robo3/janA/br/puc/lola/bab1/bab2/hid/otk/ena/Pdk1/otk2/PDZ-GEF/fru/TfAP-2/robo2/dac/tnc/mid/rpr/salm/hep/Sxl/SmB/InR/raw/zfh1/aop/shg/Pvr/Myo31DF/bsk/en/Dll/Lam	48		Female.marker.genes	GO:0030133	transport vesicle	47/2074	92/11938	1.32525e-13	1.66651e-12	9.48603e-13	unc-13-4A/VGAT/fwe/nSyb/Gdi/Sytbeta/Rab3/VGlut/jeb/CanB2/Frq2/Rim/Syx1A/Syt1/prt/Dop1R2/CanB/Tomosyn/Rab27/VAChT/syd/lap/Vha100-1/Sar1/Atet/Syt12/RabX4/Rab11/Clc/Sec13/Syn/Ykt6/Rph/Syngr/Syt7/Vmat/Rab35/Rab3-GEF/Cirl/Syt4/Cadps/unc-13/Syx6/Esyt2/Pldn/Scamp/Eps-15	47
Female.marker.genes	GO:0009055	electron transfer activity	26/2020	68/12127	1.61836e-05	0.000136922	9.34703e-05	Cyt-c-p/UQCR-Q/cype/UQCR-14/COX5A/COX5B/COX8/COX7C/ND-MLRQ/UQCR-6.4/SdhC/RFeSP/COX4/Cyt-c1/COX6B/UQCR-C2/levy/COX7A/ox/UQCR-C1/CG7834/SdhB/UQCR-11/Trxr-1/ND-B17.2/ND-75	26		Male.marker.genes	GO:2000027	regulation of animal organ morphogenesis	46/2449	94/12275	2.54343e-10	2.69865e-09	1.33471e-09	hth/Abd-B/tsh/put/Akap200/pros/aPKC/ed/cdi/Diap1/stan/hwt/Mbs/norpA/Src64B/tinc/Socs36E/hid/chn/sty/Mad/Smox/Galphaq/spg/Apc/shn/PDZ-GEF/gish/Src42A/Dab/fwd/sd/csw/Nedd4/RasGAP1/pAbp/neur/oc/aop/sv/sog/baz/Mlf/tkv/Vang/klu	46		Female.marker.genes	GO:0005740	mitochondrial envelope	107/2074	313/11938	2.71515e-13	3.33103e-12	1.89607e-12	sesB/Cyt-c-p/GC1/UQCR-Q/cype/ATPsynF/blw/Neb-cGP/ATPsynCF6/porin/UQCR-14/sun/COX5A/COX5B/COX7C/Tim8/ND-B14.7/ND-30/QIL1/ND-MLRQ/UQCR-6.4/ND-13A/SdhC/RFeSP/ATPsynB/COX4/Cyt-c1/CG6878/COX6B/ATPsyndelta/CG5903/UQCR-C2/ATPsynE/levy/ND-ACP/ATPsyngamma/ND-B12/ATPsynbeta/COX7A/CG5059/Tom20/rpr/Mpcp2/Fis1/Hsc70-4/ND-51/CG5676/ND-39/Scox/Tspo/ND-B14.5A/ox/CG11752/ATPsynC/ND-20/ND-B14/Mgstl/ND-B14.5B/ATPsy…	107
Female.marker.genes	GO:0046873	metal ion transmembrane transporter activity	57/2020	200/12127	1.70115e-05	0.000142057	9.69759e-05	nrv3/GC1/CG10804/fwe/Atpalpha/kcc/SPoCk/Calx/CG42340/nrv2/GluRIA/Shawl/Ca-alpha1T/eag/CG42594/SK/para/Sh/Mid1/CG1688/Shaw/KCNQ/CG43066/SLO2/prt/Elk/slo/rdgB/PMCA/Ndae1/Trpm/Ca-alpha1D/Ca-beta/Hk/Shab/Eaat2/CG4587/Ih/Nckx30C/tipE/RyR/jp/Task6/cac/Trpgamma/ZnT63C/Vmat/DAT/Shal/CG7708/MCU/NaCP60E/olf186-F/CG1090/stj/CG43155/Nhe2	57		Male.marker.genes	GO:0045596	negative regulation of cell differentiation	59/2449	135/12275	2.5908e-10	2.73885e-09	1.35459e-09	Rtca/COX5A/COX4/UQCR-14/Abd-B/COX7C/hdc/emc/Snoo/CSN5/CadN/pros/Bruce/ed/Hs3st-B/Sema1a/Fas2/lwr/cdi/Diap1/klar/norpA/numb/Socs36E/erm/chn/EcR/brat/Galphaq/CG7834/sdk/Apc/Abl/CG5214/bun/osa/bif/salm/C1GalTA/MED22/MED10/sd/Stat92E/Ptpmeg/RasGAP1/lqf/Dl/cact/wts/neur/Ctr9/zfh1/aop/lid/fuss/pnt/MED4/Sema2a/kibra	59		Female.marker.genes	GO:0022627	cytosolic small ribosomal subunit	30/2074	45/11938	2.9933e-13	3.58483e-12	2.04054e-12	RpS6/RpS13/RpS3A/sta/RpS25/RpS27/RpS20/RpS9/LTV1/RpS15Aa/RpL40/RpS7/RpS2/RpS23/MCTS1/RpS27A/RpS11/RpS18/RpS8/RpS3/RpS12/RpS16/RpS15/RpS21/RpS17/RpS29/RpS24/RpS19a/RpS5a/Rack1	30
Female.marker.genes	GO:0003712	transcription coregulator activity	45/2020	148/12127	2.24609e-05	0.000185159	0.000126399	Ssb-c31a/Tob/mam/sbb/tai/Sirt1/mnb/nej/shn/Smr/Eip75B/Mad/tna/Gug/TfIIA-S/akirin/Sin3A/emc/alien/DOR/CG5446/Taf13/MED7/Bin1/e(y)2/MED10/MED28/EcR/acj6/Chi/Lpin/Bgb/Pax/CtBP/MBD-like/arm/MED4/CG13293/per/kto/CG13287/Sgf11/exd/MED26/skd	45		Male.marker.genes	GO:0007043	cell-cell junction assembly	33/2449	57/12275	3.0748e-10	3.23864e-09	1.60178e-09	kune/pasi2/crim/p120ctn/pasi1/pyd/cold/Lac/nrv2/pck/Cont/Atpalpha/shakB/Nrg/aPKC/CadN2/sns/Galphao/Nrx-IV/bou/sdt/crb/Src64B/kirre/CG44325/dlg1/arm/btsz/scrib/shg/wun/baz/vari	33		Female.marker.genes	GO:0008021	synaptic vesicle	37/2074	65/11938	6.89039e-13	8.06015e-12	4.58797e-12	unc-13-4A/VGAT/fwe/nSyb/Gdi/Sytbeta/Rab3/VGlut/jeb/CanB2/Frq2/Rim/Syx1A/Syt1/prt/Dop1R2/CanB/Tomosyn/Rab27/lap/Vha100-1/RabX4/Clc/Syn/Rph/Syngr/Syt7/Vmat/Rab3-GEF/Cirl/Syt4/Cadps/unc-13/Syx6/Esyt2/Scamp/Eps-15	37
Female.marker.genes	GO:0009975	cyclase activity	15/2020	30/12127	2.52967e-05	0.000205896	0.000140556	Gycbeta100B/Ac13E/rut/CG10738/Ac78C/CG34357/Gycalpha99B/Rtca/CG31183/Ac3/Gyc88E/Gyc89Db/Ac76E/CG43373/Gyc89Da	15		Male.marker.genes	GO:0048878	chemical homeostasis	95/2449	261/12275	3.29041e-10	3.45314e-09	1.70786e-09	IscU/Men-b/Tpi/Torsin/Cbp53E/CG14757/PyK/sesB/fwe/nrv3/Eno/Gapdh2/SPoCk/Nckx30C/Atox1/VhaAC45/nrv2/endos/Atpalpha/PMCA/shakB/Nhe3/Vha68-1/fra/Fer2LCH/FMRFaR/amon/Glut1/CG1090/Ndae1/uex/SERCA/smt3/Fer1HCH/CG31030/CG10470/Scox/CG1840/Rheb/CG14184/norpA/cac/AdipoR/ftz-f1/EcR/Sik3/Hex-A/Atf3/Mid1/Plc21C/Trpgamma/ktub/Oamb/Dop1R1/Trpm/EMRE/Akt1/Best1/hep/MCU/scaf6/wrd/unc80/Rab14/hppy/foxo/Ppcs/ey/Dop…	95		Female.marker.genes	GO:0098794	postsynapse	39/2074	72/11938	1.42252e-12	1.6262e-11	9.25659e-12	nAChRalpha6/Spn/nAChRalpha5/X11Lbeta/Ten-m/sky/Syp/nAChRalpha1/Nlg2/Neto/inaE/Prosap/Fas2/dlg1/scrib/shi/slo/Drep2/nAChRbeta1/Magi/nAChRalpha3/nAChRalpha7/eIF4E1/Cals/nAChRalpha2/nAChRbeta2/veli/Clc/Rpt6/Nmdar1/pum/CaMKII/nAChRalpha4/Syt4/Grip/drpr/unc-13/Pldn/hts	39
Female.marker.genes	GO:0005216	ion channel activity	64/2020	235/12127	2.58429e-05	0.000207712	0.000141796	porin/fwe/Nmdar2/nAChRalpha6/nAChRalpha5/CG42340/GluClalpha/GluRIB/GluRIA/Shawl/pHCl-1/Ca-alpha1T/eag/CG42594/SK/para/Rdl/Sh/Mid1/nAChRalpha1/CG3638/CG1688/Shaw/KCNQ/Cngl/SLO2/Elk/CG42260/slo/nAChRbeta1/Trpm/Ca-alpha1D/Ca-beta/Hk/Shab/nAChRalpha3/nAChRalpha7/tty/CG4587/Ih/Nckx30C/tipE/RyR/jp/Task6/nAChRalpha2/nAChRbeta2/cac/Nmdar1/Trpgamma/bib/unc80/GPHR/nAChRalpha4/CG15270/Shal/MCU/NaCP60E/olf18…	64		Male.marker.genes	GO:0045475	locomotor rhythm	38/2449	71/12275	3.32061e-10	3.4722e-09	1.71729e-09	unc79/Bx/CkIIalpha/Fer2LCH/disco/Ih/dnc/Mbs/kay/dysc/Mid1/tara/Fer2/Rac1/Mef2/nej/Ac3/sxc/CkIIbeta/unc80/dlg1/Adar/foxo/Hr51/Pka-R2/dco/dod/tim/Rho1/lid/tyf/NPF/Pdfr/Dh44/Bdbt/qsm/na/dome	38		Female.marker.genes	GO:0034702	ion channel complex	42/2074	83/11938	3.99447e-12	4.46493e-11	2.54151e-11	Nmdar2/nAChRalpha6/nAChRalpha5/GluRIB/GluRIA/Shawl/Ca-alpha1T/eag/para/Sh/nAChRalpha1/Neto/Shaw/KCNQ/Cngl/Prosap/Elk/dlg1/CG42260/scrib/nAChRbeta1/Trpm/Ca-alpha1D/Ca-beta/Hk/Shab/nAChRalpha3/nAChRalpha7/CG4587/RyR/nAChRalpha2/nAChRbeta2/cac/Nmdar1/Trpgamma/unc80/nAChRalpha4/Shal/MCU/EMRE/Grip/NaCP60E	42
Female.marker.genes	GO:0019904	protein domain specific binding	28/2020	78/12127	3.04952e-05	0.000239738	0.000163659	fz2/Lar/ena/sd/pico/fra/14-3-3zeta/comm/mim/Ndfip/nkd/Dys/hid/14-3-3epsilon/Arl1/e(y)2/Tl/cindr/Chi/rst/fkh/aop/cno/psq/bip2/Hsp83/Ubx/imd	28		Male.marker.genes	GO:0008582	regulation of synaptic growth at neuromuscular junction	50/2449	107/12275	3.43913e-10	3.58315e-09	1.77217e-09	nwk/Syp/CaMKII/Sdc/futsch/Galphao/Fas2/Syn1/veli/wit/Rheb/Octbeta2R/cac/Src64B/Dad/nmo/Mad/dysc/plum/brat/ena/Octbeta1R/Ank2/pum/Liprin-gamma/mnb/Abl/Src42A/simj/kis/trio/Akt1/Fak/slo/Mob2/CASK/dlg1/unc-104/stj/metro/Cip4/SkpA/Mob4/Eps-15/Arp3/tkv/dbo/Syn2/alpha-Spec/Synd	50		Female.marker.genes	GO:0031967	organelle envelope	132/2074	432/11938	5.5277e-12	5.91581e-11	3.36738e-11	sesB/Cyt-c-p/GC1/UQCR-Q/cype/ATPsynF/blw/Neb-cGP/ATPsynCF6/porin/UQCR-14/Msp300/sun/COX5A/COX5B/COX7C/Tim8/ND-B14.7/ND-30/QIL1/ND-MLRQ/UQCR-6.4/ND-13A/SdhC/RFeSP/ATPsynB/COX4/Cyt-c1/CG6878/COX6B/ATPsyndelta/CG5903/UQCR-C2/ATPsynE/levy/ND-ACP/ATPsyngamma/ND-B12/ATPsynbeta/COX7A/Fas3/Sirt1/bru1/toc/CG5059/14-3-3zeta/Lis-1/Tom20/rpr/Mpcp2/Pdi/Mtor/schlank/klar/Fis1/Dlic/Lk6/Hsc70-4/ND-51/CG5676/ND-3…	132
Female.marker.genes	GO:0005085	guanyl-nucleotide exchange factor activity	29/2020	82/12127	3.05732e-05	0.000239738	0.000163659	Efa6/CG7369/CG43658/CG42674/sif/mbc/CG5110/siz/trio/Rgl/Sec61beta/Zir/Exn/spg/spri/Epac/Tctp/GEFmeso/Rab3-GEF/CG34393/Cdep/eEF1delta/CG14977/Bet5/Trs31/pns/CG9098/CG14812/eEF1beta	29		Male.marker.genes	GO:0008064	regulation of actin polymerization or depolymerization	34/2449	60/12275	3.67583e-10	3.80231e-09	1.88056e-09	Btk29A/nwk/chinmo/Arpc5/svr/Arpc4/Arpc3A/Arpc1/IRSp53/Src64B/ena/spir/DAAM/Abl/Cortactin/gish/Vrp1/Kank/chic/RhoBTB/PsGEF/shi/Cip4/dco/sals/Arpc2/Arp3/capu/tmod/hts/Rack1/twf/Lam/CG6891	34		Female.marker.genes	GO:0031975	envelope	132/2074	432/11938	5.5277e-12	5.91581e-11	3.36738e-11	sesB/Cyt-c-p/GC1/UQCR-Q/cype/ATPsynF/blw/Neb-cGP/ATPsynCF6/porin/UQCR-14/Msp300/sun/COX5A/COX5B/COX7C/Tim8/ND-B14.7/ND-30/QIL1/ND-MLRQ/UQCR-6.4/ND-13A/SdhC/RFeSP/ATPsynB/COX4/Cyt-c1/CG6878/COX6B/ATPsyndelta/CG5903/UQCR-C2/ATPsynE/levy/ND-ACP/ATPsyngamma/ND-B12/ATPsynbeta/COX7A/Fas3/Sirt1/bru1/toc/CG5059/14-3-3zeta/Lis-1/Tom20/rpr/Mpcp2/Pdi/Mtor/schlank/klar/Fis1/Dlic/Lk6/Hsc70-4/ND-51/CG5676/ND-3…	132
Female.marker.genes	GO:0005544	calcium-dependent phospholipid binding	9/2020	13/12127	3.64762e-05	0.00028258	0.000192905	Sytbeta/Syt1/Syt12/Rph/Syt7/Syt4/Esyt2/AnxB11/AnxB10	9		Male.marker.genes	GO:0030832	regulation of actin filament length	34/2449	60/12275	3.67583e-10	3.80231e-09	1.88056e-09	Btk29A/nwk/chinmo/Arpc5/svr/Arpc4/Arpc3A/Arpc1/IRSp53/Src64B/ena/spir/DAAM/Abl/Cortactin/gish/Vrp1/Kank/chic/RhoBTB/PsGEF/shi/Cip4/dco/sals/Arpc2/Arp3/capu/tmod/hts/Rack1/twf/Lam/CG6891	34		Female.marker.genes	GO:0031982	vesicle	130/2074	424/11938	6.17749e-12	6.47349e-11	3.68482e-11	unc-13-4A/VGAT/CG32225/fwe/nSyb/Gdi/nwk/Sytbeta/Vha55/Rab3/VGlut/cmpy/Nos/fz2/jeb/Tbh/CanB2/hbs/CG34384/wit/S/Fas3/Frq2/Rim/Syx1A/w/Syt1/CG6051/nuf/Evi5/rho/olf413/CG5110/CG4080/Klp98A/Rab18/prt/Dop1R2/CanB/Tomosyn/neur/Rab27/7B2/comm/shi/Dl/fz/VAChT/Cip4/ed/Snap24/AP-2sigma/Lamp1/Rab14/syd/lap/Graf/CG32758/Ndfip/Vha100-1/Sar1/CHOp24/bai/ergic53/robo1/Sap-r/aph-1/Dtg/alphaSnap/Atet/RyR/Syt12/CG13…	130
Female.marker.genes	GO:0022838	substrate-specific channel activity	64/2020	238/12127	3.94527e-05	0.000300008	0.000204802	porin/fwe/Nmdar2/nAChRalpha6/nAChRalpha5/CG42340/GluClalpha/GluRIB/GluRIA/Shawl/pHCl-1/Ca-alpha1T/eag/CG42594/SK/para/Rdl/Sh/Mid1/nAChRalpha1/CG3638/CG1688/Shaw/KCNQ/Cngl/SLO2/Elk/CG42260/slo/nAChRbeta1/Trpm/Ca-alpha1D/Ca-beta/Hk/Shab/nAChRalpha3/nAChRalpha7/tty/CG4587/Ih/Nckx30C/tipE/RyR/jp/Task6/nAChRalpha2/nAChRbeta2/cac/Nmdar1/Trpgamma/bib/unc80/GPHR/nAChRalpha4/CG15270/Shal/MCU/NaCP60E/olf18…	64		Male.marker.genes	GO:0010721	negative regulation of cell development	43/2449	86/12275	4.08271e-10	4.20811e-09	2.08126e-09	Rtca/COX5A/COX4/UQCR-14/COX7C/hdc/emc/CadN/pros/Bruce/ed/Hs3st-B/Sema1a/Fas2/cdi/Diap1/klar/norpA/numb/Socs36E/erm/EcR/brat/Galphaq/CG7834/sdk/Apc/Abl/CG5214/osa/bif/MED22/MED10/sd/Ptpmeg/RasGAP1/Dl/wts/Ctr9/aop/MED4/Sema2a/kibra	43		Female.marker.genes	GO:0044445	cytosolic part	89/2074	256/11938	1.00458e-11	1.03123e-10	5.86994e-11	Eno/IscU/RpLP0/Gycbeta100B/Snap25/RpL12/RpS6/RpL15/RpL36/Gycalpha99B/RpS13/CCT5/RpL23/RpS3A/CCT4/sta/Rpt3/Blos1/Rpt6/RpL26/RpL28/RpL41/RpS25/RpS27/RpS20/RpL27A/RpL32/RpS9/RpL23A/RpL8/RpL37A/RpL24-like/LTV1/RpL5/Sgt/Gyc88E/Gyc89Db/CG17683/RpS15Aa/RpL19/RpLP2/RpL40/RpS7/RpL35/RpS2/RpL38/RpL18A/Gyc89Da/mRpL1/RpL34a/Blos3/Pldn/Blos4/RpL36A/RpS23/CG5071/MCTS1/RpS27A/RpL34b/RpL17/RpS11/RpL39/RpS18/RpS8…	89
Female.marker.genes	GO:0008135	translation factor activity, RNA binding	27/2020	75/12127	3.96589e-05	0.000300008	0.000204802	eEF5/orb2/eIF4EHP/eIF4E1/eIF4G1/eEF1alpha1/DENR/eIF2alpha/eIF3m/orb/eIF3l/eIF4A/eIF3g1/eIF3e/eEF1alpha2/NAT1/eEF2/eEF1delta/mEFTs/mEFTu1/eEF1gamma/eIF3b/eIF2gamma/eIF4H1/eIF3f1/eRF1/eEF1beta	27		Male.marker.genes	GO:0034329	cell junction assembly	35/2449	63/12275	4.2567e-10	4.37183e-09	2.16224e-09	kune/pasi2/crim/p120ctn/pasi1/pyd/cold/Lac/nrv2/pck/Cont/Atpalpha/shakB/Nrg/aPKC/CadN2/sns/Galphao/Nrx-IV/bou/sdt/crb/Src64B/cindr/kirre/PDZ-GEF/CG44325/dlg1/arm/btsz/scrib/shg/wun/baz/vari	35		Female.marker.genes	GO:0030054	cell junction	63/2074	160/11938	2.96724e-11	2.98504e-10	1.69913e-10	Atpalpha/CadN/sdt/Lar/smal/nrv2/stan/hbs/Efa6/Moe/CadN2/LRR/Fas3/kune/ena/Csk/shakB/Nrg/otk/cora/a/dlg1/scrib/Dl/aPKC/ed/Swip-1/ckn/Magi/wts/kug/kirre/crb/RASSF8/Mbs/pyd/Lac/pck/p120ctn/veli/crim/sqh/Kank/rst/baz/otk2/bib/sns/cno/Pax/ASPP/arm/wech/Abl/CG45049/vari/Grip/kibra/shot/Zyx/FER/Rho1/Src42A	63
Female.marker.genes	GO:0008187	poly-pyrimidine tract binding	10/2020	16/12127	4.86587e-05	0.00035554	0.000242712	fne/Rbp6/shep/Sxl/Hrb27C/elav/pAbp/U2af50/ssx/CG4612	10		Male.marker.genes	GO:0051656	establishment of organelle localization	79/2449	205/12275	4.75825e-10	4.86961e-09	2.40843e-09	gammaSnap1/sesB/Nnf1a/cpx/Msp300/Rab3/sky/Mis12/sqh/ctp/nSyb/faf/aPKC/Chc/Mtor/Lis-1/Tomosyn/GABA-B-R2/Sar1/Dhc64C/unc-13-4A/Nrx-IV/Pp1-87B/nudC/Syx1A/klar/msn/Syx6/Fife/flw/Rim/Klp98A/jvl/wake/Sytbeta/NFAT/Syt4/pix/Cadps/Snap25/chb/jagn/Rop/tacc/Syn/unc-13/Syx13/Ran/CASK/dlg1/Blos1/unc-104/BicD/Syt1/east/Khc-73/Syt7/cv-c/Rab27/shi/Snap24/Aplip1/Syngr/Drp1/cno/Rph/alphaSnap/baz/Liprin-alpha/LTV1/…	79		Female.marker.genes	GO:1902495	transmembrane transporter complex	45/2074	98/11938	4.87413e-11	4.80723e-10	2.73635e-10	nrv3/Atpalpha/Nmdar2/nAChRalpha6/nAChRalpha5/nrv2/GluRIB/GluRIA/Shawl/Ca-alpha1T/eag/para/Sh/nAChRalpha1/Neto/Shaw/KCNQ/Cngl/Prosap/Elk/dlg1/CG42260/scrib/nAChRbeta1/Trpm/Ca-alpha1D/Ca-beta/Hk/Shab/nAChRalpha3/nAChRalpha7/CG4587/RyR/nAChRalpha2/nAChRbeta2/cac/Nmdar1/Trpgamma/unc80/nAChRalpha4/Shal/MCU/EMRE/Grip/NaCP60E	45
Female.marker.genes	GO:0030371	translation repressor activity	10/2020	16/12127	4.86587e-05	0.00035554	0.000242712	Sxl/brat/orb2/eIF4EHP/elav/msi/heph/orb/pum/Paip2	10		Male.marker.genes	GO:0051640	organelle localization	93/2449	256/12275	5.68381e-10	5.77904e-09	2.85822e-09	gammaSnap1/sesB/Nnf1a/cpx/Msp300/Rab3/sky/alphaTub84B/RabX4/Rab11/Mis12/sqh/tsu/Bsg/ctp/nSyb/faf/aPKC/Chc/Mtor/Lis-1/Tomosyn/GABA-B-R2/Sar1/Dhc64C/unc-13-4A/Nrx-IV/Pp1-87B/CRMP/nudC/Syx1A/klar/msn/crb/numb/Syx6/Fife/flw/Rim/Klp98A/jvl/wake/Sytbeta/NFAT/Syt4/pix/Cadps/Snap25/chb/jagn/Rop/RhoGAP100F/tacc/Syn/unc-13/Syx13/Ran/wrd/CASK/dlg1/Blos1/unc-104/larp/BicD/Syt1/east/Khc-73/cnc/Syt7/cv-c/Rab27…	93		Female.marker.genes	GO:0005938	cell cortex	68/2074	182/11938	7.89655e-11	7.63839e-10	4.3479e-10	app/igl/sdt/Spn/Moe/Fife/Syp/Ten-a/Rim/sano/brat/drongo/numb/nuf/toc/CG42684/pnut/cv-c/Rbp/dlg1/scrib/brp/Dl/aPKC/Lis-1/ed/Lrch/wts/CD98hc/pros/Sep1/tmod/Dys/msn/Mbs/Sep2/sqh/Clc/Ran/Rab7/spri/cindr/chic/Tm1/capt/baz/Bsg/cno/Rab35/Abl/alpha-Spec/borr/Spec2/kibra/jar/capu/stau/unc-13/Sep4/spir/corn/Arp2/Rho1/Arpc2/beta-Spec/Rab5/Arp1/GMF	68
Female.marker.genes	GO:0090079	translation regulator activity, nucleic acid binding	10/2020	16/12127	4.86587e-05	0.00035554	0.000242712	Sxl/orb2/elav/msi/bol/heph/orb/pum/Paip2/P32	10		Male.marker.genes	GO:0110053	regulation of actin filament organization	38/2449	72/12275	5.68693e-10	5.77904e-09	2.85822e-09	Btk29A/nwk/chinmo/CG43658/Arpc5/svr/Arpc4/Arpc3A/Arpc1/IRSp53/Src64B/ena/spir/DAAM/Abl/Cortactin/gish/Vrp1/Kank/chic/fz/RhoBTB/PsGEF/hep/shi/Cip4/dco/sals/Arpc2/Arp3/capu/tmod/hts/Rack1/CG1674/twf/Lam/CG6891	38		Female.marker.genes	GO:1990351	transporter complex	46/2074	107/11938	4.60153e-10	4.31257e-09	2.45478e-09	nrv3/Atpalpha/Nmdar2/nAChRalpha6/nAChRalpha5/nrv2/GluRIB/GluRIA/Shawl/Ca-alpha1T/eag/para/Sh/nAChRalpha1/Neto/Shaw/KCNQ/Cngl/Prosap/Elk/dlg1/CG42260/scrib/nAChRbeta1/Trpm/Ca-alpha1D/Ca-beta/Hk/Shab/nAChRalpha3/nAChRalpha7/CG4587/RyR/nAChRalpha2/nAChRbeta2/cac/Nmdar1/Trpgamma/unc80/nAChRalpha4/Shal/MCU/EMRE/Grip/NaCP60E/CG34132	46
Female.marker.genes	GO:0016655	oxidoreductase activity, acting on NAD(P)H, quinone or similar compound as acceptor	13/2020	25/12127	5.21233e-05	0.000376576	0.000257072	ND-30/ND-51/ND-B14.5A/ND-20/ND-B14.5B/ND-B15/ND-B16.6/ND-ASHI/ND-B18/ND-18/ND-B17.2/ND-42/ND-75	13		Male.marker.genes	GO:0007187	G protein-coupled receptor signaling pathway, coupled to cyclic nucleotide second messenger	33/2449	58/12275	5.77244e-10	5.84535e-09	2.89102e-09	TyrR/DopEcR/GABA-B-R2/mAChR-A/GABA-B-R1/Galphao/5-HT1A/Oct-TyrR/Galphas/CG12290/Octbeta2R/Dop2R/Octbeta3R/Galphaq/Octbeta1R/5-HT7/Ac78C/Dh31/Oamb/Dop1R1/mAChR-B/5-HT2A/5-HT1B/Ac3/Cirl/Ac13E/rut/Dop1R2/Ac76E/CG43373/rk/Lgr4/Pdfr	33		Female.marker.genes	GO:0045169	fusome	22/2074	33/11938	4.6298e-10	4.31257e-09	2.45478e-09	Calr/chb/CG12163/scrib/Vha16-1/Fer1HCH/CLIP-190/tmod/Sec61alpha/Pdi/Sap-r/Cp1/Tsp42Ee/Rab11/tral/Rtnl1/alpha-Spec/shot/TER94/sgg/beta-Spec/hts	22
Female.marker.genes	GO:0000149	SNARE binding	19/2020	46/12127	6.43502e-05	0.000459746	0.000313848	nSyb/Sytbeta/Snap25/Syx1A/Syt1/cpx/Tomosyn/Snap24/lap/alphaSnap/Syt12/gammaSnap1/Syt7/gammaSnap2/Syt4/unc-13/Syx6/Rop/Bet1	19		Male.marker.genes	GO:0012501	programmed cell death	113/2449	331/12275	6.28499e-10	6.34213e-09	3.13671e-09	Idh3b/mbl/abd-A/Abd-B/fwe/chrb/hdc/CG10257/Su(var)205/BI-1/Fili/Cam/ctp/futsch/Actbeta/aPKC/drpr/Chc/Bruce/mask/Ubr3/CG12384/Diap1/CG5059/mats/PDCD-5/br/Pka-C1/norpA/S/puc/lola/CG4238/hid/eEF5/Eip74EF/EcR/Drep3/Sirt1/Drep1/Trf2/viaf/Pdk1/Galphaq/cathD/Atg8a/pix/eIF3m/Csk/Apc/rst/rdx/Hipk/yki/Prx3/Atg1/bun/Akt1/Atg17/Mdh2/Hsp60A/rpr/mav/skl/scyl/Fis1/CG30428/wrd/mod(mdg4)/Acn/csw/Utx/hppy/arm/Dl/D…	113		Female.marker.genes	GO:0005911	cell-cell junction	44/2074	101/11938	6.55883e-10	5.99835e-09	3.41436e-09	Atpalpha/CadN/sdt/nrv2/stan/hbs/Moe/CadN2/Fas3/kune/ena/Csk/shakB/Nrg/otk/cora/dlg1/scrib/Dl/aPKC/ed/wts/kirre/crb/Mbs/pyd/Lac/pck/p120ctn/veli/crim/sqh/rst/baz/otk2/sns/cno/arm/Abl/CG45049/vari/kibra/Zyx/Rho1	44
Female.marker.genes	GO:0008289	lipid binding	47/2020	163/12127	6.60592e-05	0.00046677	0.000318643	fabp/nwk/Sytbeta/mGluR/Efa6/Moe/Gprk2/qvr/Syt1/Klp98A/cv-c/neur/DopEcR/Dl/rdgB/Cip4/mim/CG8726/lap/Graf/CG32758/rpr/IRSp53/CG6329/Syt12/CG3732/EcR/baz/Rph/gce/EndoB/Syt7/cert/Gprk1/Amph/Pcyt1/Syt4/unc-119/Npc2a/drpr/unc-13/Esyt2/AnxB11/AnxB10/FER/beta-Spec/ninaC	47		Male.marker.genes	GO:0048608	reproductive structure development	42/2449	84/12275	6.5155e-10	6.52907e-09	3.22917e-09	Btk29A/abd-A/Abd-B/dsx/Wnt4/salr/tsr/ct/sli/Invadolysin/robo1/Fas2/fz2/robo3/br/puc/lola/bab2/otk/ena/otk2/PDZ-GEF/TfAP-2/robo2/tnc/mid/rpr/salm/hep/SmB/InR/raw/dve/zfh1/aop/shg/Pvr/Myo31DF/bsk/en/Dll/Lam	42		Female.marker.genes	GO:0022626	cytosolic ribosome	70/2074	200/11938	1.18277e-09	1.06238e-08	6.04723e-09	RpLP0/RpL12/RpS6/RpL15/RpL36/RpS13/RpL23/RpS3A/sta/RpL26/RpL28/RpL41/RpS25/RpS27/RpS20/RpL27A/RpL32/RpS9/RpL23A/RpL8/RpL37A/RpL24-like/LTV1/RpL5/RpS15Aa/RpL19/RpLP2/RpL40/RpS7/RpL35/RpS2/RpL38/RpL18A/mRpL1/RpL34a/RpL36A/RpS23/CG5071/MCTS1/RpS27A/RpL34b/RpL17/RpS11/RpL39/RpS18/RpS8/RpS3/RpS12/RpL30/RpL10/RpL6/RpS16/RpL18/RpS15/RpL10Ab/RpL7/RpL14/RpL21/RpS21/RpL7A/RpLP1/RpL27/RpS17/RpS29/RpS24/RpL1…	70
Female.marker.genes	GO:0015267	channel activity	65/2020	249/12127	9.09581e-05	0.000628882	0.00042931	porin/fwe/Nmdar2/nAChRalpha6/nAChRalpha5/CG42340/GluClalpha/GluRIB/GluRIA/Shawl/pHCl-1/Ca-alpha1T/eag/CG42594/SK/para/Rdl/Sh/Mid1/nAChRalpha1/CG3638/CG1688/Shaw/KCNQ/shakB/Cngl/SLO2/Elk/CG42260/slo/nAChRbeta1/Trpm/Ca-alpha1D/Ca-beta/Hk/Shab/nAChRalpha3/nAChRalpha7/tty/CG4587/Ih/Nckx30C/tipE/RyR/jp/Task6/nAChRalpha2/nAChRbeta2/cac/Nmdar1/Trpgamma/bib/unc80/GPHR/nAChRalpha4/CG15270/Shal/MCU/NaCP60E…	65		Male.marker.genes	GO:0061458	reproductive system development	42/2449	84/12275	6.5155e-10	6.52907e-09	3.22917e-09	Btk29A/abd-A/Abd-B/dsx/Wnt4/salr/tsr/ct/sli/Invadolysin/robo1/Fas2/fz2/robo3/br/puc/lola/bab2/otk/ena/otk2/PDZ-GEF/TfAP-2/robo2/tnc/mid/rpr/salm/hep/SmB/InR/raw/dve/zfh1/aop/shg/Pvr/Myo31DF/bsk/en/Dll/Lam	42		Female.marker.genes	GO:0043235	receptor complex	37/2074	79/11938	1.27385e-09	1.12412e-08	6.39868e-09	Nmdar2/mGluR/nAChRalpha6/nAChRalpha5/drl/GluRIB/GluRIA/wit/GABA-B-R3/nAChRalpha1/Neto/put/Drl-2/Prosap/dlg1/scrib/nAChRbeta1/babo/nAChRalpha3/nAChRalpha7/Eph/PlexA/Alk/InR/GABA-B-R1/alien/Ret/nAChRalpha2/Ddr/nAChRbeta2/Ror/EcR/Pvr/Nmdar1/nAChRalpha4/Grip/CG3277	37
Female.marker.genes	GO:0022803	passive transmembrane transporter activity	65/2020	249/12127	9.09581e-05	0.000628882	0.00042931	porin/fwe/Nmdar2/nAChRalpha6/nAChRalpha5/CG42340/GluClalpha/GluRIB/GluRIA/Shawl/pHCl-1/Ca-alpha1T/eag/CG42594/SK/para/Rdl/Sh/Mid1/nAChRalpha1/CG3638/CG1688/Shaw/KCNQ/shakB/Cngl/SLO2/Elk/CG42260/slo/nAChRbeta1/Trpm/Ca-alpha1D/Ca-beta/Hk/Shab/nAChRalpha3/nAChRalpha7/tty/CG4587/Ih/Nckx30C/tipE/RyR/jp/Task6/nAChRalpha2/nAChRbeta2/cac/Nmdar1/Trpgamma/bib/unc80/GPHR/nAChRalpha4/CG15270/Shal/MCU/NaCP60E…	65		Male.marker.genes	GO:0007350	blastoderm segmentation	82/2449	217/12275	6.82355e-10	6.8141e-09	3.37014e-09	hth/Ubx/Abd-B/tsh/Antp/Rab11/tsu/CSN5/rump/Hsp83/wls/aPKC/Cow/Chc/nkd/enc/Dg/fz2/mago/SmD3/lost/dlp/stan/SoxN/Syx1A/klar/Pka-C1/pan/lilli/arr/D/orb/tud/fs(1)h/dally/AGO1/cic/Mad/Hrb27C/jing/spir/pum/sfl/sqd/Apc/rdx/Moe/Tm1/Rop/kis/glo/lgs/odd/chic/hb/fz/Rab6/dlg1/Stat92E/Syt1/csw/RasGAP1/cnc/arm/psq/scrib/bic/cni/run/oc/shg/croc/baz/apt/Pat1/en/capu/kn/Axn/TER94/tio/dome	82		Female.marker.genes	GO:0099501	exocytic vesicle membrane	14/2074	16/11938	1.85786e-09	1.61122e-08	9.1713e-09	VGAT/fwe/VGlut/Syt1/prt/Dop1R2/Atet/Clc/Syn/Rph/Syngr/Vmat/unc-13/Syx6	14
Female.marker.genes	GO:0016849	phosphorus-oxygen lyase activity	14/2020	30/12127	0.00012296	0.000832242	0.000568135	Gycbeta100B/Ac13E/rut/CG10738/Ac78C/CG34357/Gycalpha99B/CG31183/Ac3/Gyc88E/Gyc89Db/Ac76E/CG43373/Gyc89Da	14		Male.marker.genes	GO:0051050	positive regulation of transport	55/2449	125/12275	7.67499e-10	7.63794e-09	3.7776e-09	tsr/Rab11/Cam/Nrx-1/wls/CG6329/drpr/Chc/Mtor/Glut1/Sar1/Sec61alpha/SERCA/sdt/CaBP1/Snx3/qvr/norpA/cac/S/numb/AdipoR/Fife/cindr/dysc/Gprk2/Pkc53E/Syt4/mnb/Apoltp/Flo2/Abl/spri/Cortactin/Cadps/Moe/Smurf/LpR2/corn/CASK/unc-104/BicD/Syt1/Nedd4/comm/Rab27/neur/tim/prtp/O-fut1/Graf/olf186-F/Rab1/Syx7/Sec16	55		Female.marker.genes	GO:0045211	postsynaptic membrane	26/2074	47/11938	4.28789e-09	3.65561e-08	2.08083e-08	nAChRalpha6/nAChRalpha5/Ten-m/nAChRalpha1/Nlg2/inaE/Prosap/Fas2/dlg1/scrib/shi/slo/Drep2/nAChRbeta1/nAChRalpha3/nAChRalpha7/Cals/nAChRalpha2/nAChRbeta2/veli/Nmdar1/CaMKII/nAChRalpha4/Syt4/Grip/unc-13	26
Female.marker.genes	GO:0019208	phosphatase regulator activity	14/2020	30/12127	0.00012296	0.000832242	0.000568135	CanB2/CG17124/CanB/CycG/wdb/Pp2A-29B/PPP1R15/MYPT-75D/Mbs/sra/PPP4R2r/endos/mts/wrd	14		Male.marker.genes	GO:0007507	heart development	49/2449	106/12275	8.20925e-10	8.14155e-09	4.02668e-09	abd-A/Ubx/Abd-B/Antp/Lac/nrv2/Mmp2/Cont/CG3226/Nrg/sli/Gbeta13F/Sar1/robo1/Galphao/Tl/Nrx-IV/qm/mam/pan/kuz/numb/Tina-1/Mad/EcR/tup/Mef2/yki/simj/robo2/Sod2/mid/Acer/fz/sd/CHES-1-like/Nedd4/lqf/arm/cora/pyr/zfh1/shg/apt/pnt/tkv/Axn/Scgdelta/p38b	49		Female.marker.genes	GO:0030672	synaptic vesicle membrane	13/2074	15/11938	9.42317e-09	7.89975e-08	4.49667e-08	VGAT/fwe/VGlut/Syt1/prt/Dop1R2/Clc/Syn/Rph/Syngr/Vmat/unc-13/Syx6	13
Female.marker.genes	GO:0000900	translation repressor activity, mRNA regulatory element binding	8/2020	12/12127	0.000153445	0.000998081	0.000681345	Sxl/orb2/elav/msi/heph/orb/pum/Paip2	8		Male.marker.genes	GO:0050769	positive regulation of neurogenesis	47/2449	100/12275	9.11185e-10	9.00576e-09	4.4541e-09	Imp/CG10257/ctp/PlexA/Actbeta/pros/aPKC/shot/Dap160/Lis-1/Sar1/Dhc64C/stan/Rheb/nudC/Prosap/Src64B/Smox/EcR/Rac1/mnb/spg/G9a/Src42A/yki/Rop/bun/Akt1/Dab/chic/fz/PlexB/Roc1a/da/RasGAP1/Hr51/pyr/InR/oc/Myc/bsk/pnt/Vang/klu/spi/twf/Rab1	47		Female.marker.genes	GO:0070069	cytochrome complex	19/2074	30/11938	2.58754e-08	2.13366e-07	1.21451e-07	UQCR-Q/cype/UQCR-14/COX5A/COX5B/COX8/COX7C/ND-MLRQ/UQCR-6.4/RFeSP/COX4/Cyt-c1/COX6B/UQCR-C2/levy/COX7A/ox/UQCR-C1/UQCR-11	19
Female.marker.genes	GO:0008121	ubiquinol-cytochrome-c reductase activity	8/2020	12/12127	0.000153445	0.000998081	0.000681345	UQCR-Q/UQCR-14/UQCR-6.4/RFeSP/UQCR-C2/ox/UQCR-C1/UQCR-11	8		Male.marker.genes	GO:0006120	mitochondrial electron transport, NADH to ubiquinone	25/2449	38/12275	1.00182e-09	9.86778e-09	4.88044e-09	ND-SGDH/ND-42/ND-ASHI/ND-B14.5B/ND-15/ND-19/ND-B12/ND-PDSW/ND-13A/ND-MLRQ/ND-39/ND-B15/ND-B17.2/ND-B14/ND-23/ND-B18/ND-51/ND-24/ND-ACP/ND-20/ND-B16.6/ND-13B/ND-49/ND-B22/ND-B14.5A	25		Female.marker.genes	GO:0044463	cell projection part	122/2074	444/11938	4.46917e-08	3.56824e-07	2.0311e-07	Cbp53E/VGAT/hdc/nSyb/Lrp4/CadN/NetB/5-HT1A/Spn/dpr5/dpr13/dpr8/jeb/dpr18/drl/Trim9/X11Lbeta/plum/dpr20/dpr15/Shawl/dpr14/dpr4/Mical/sky/Rdl/dysc/dpr9/Mmp2/Snap25/mnb/Con/ena/dpr6/Syx1A/dpr10/orb2/dpr12/Shaw/mAChR-A/Syt1/pico/fra/unc-104/chb/erm/Prosap/Fas2/DIP-gamma/kek6/Dscam1/cdc14/gogo/Pka-C1/prt/Dop1R1/cpx/dlg1/norpA/shi/Atg8a/rdgB/metro/VAChT/trio/Lis-1/Magi/CLIP-190/Oamb/robl/nAChRalpha7/dp…	122
Female.marker.genes	GO:0016681	oxidoreductase activity, acting on diphenols and related substances as donors, cytochrome as acceptor	8/2020	12/12127	0.000153445	0.000998081	0.000681345	UQCR-Q/UQCR-14/UQCR-6.4/RFeSP/UQCR-C2/ox/UQCR-C1/UQCR-11	8		Male.marker.genes	GO:0009792	embryo development ending in birth or egg hatching	81/2449	215/12275	1.02437e-09	1.00401e-08	4.96566e-09	Btk29A/tsh/chrb/put/emc/pyd/Rab11/sqh/faf/zip/shot/ed/Sec61alpha/sns/Nrx-IV/lwr/Smn/Arpc1/msn/Mbs/crb/Eip63E/puc/Myo10A/rho/hid/mbc/lolal/chn/Mad/yrt/EcR/kay/ena/Rac1/sr/rhea/pum/Abl/kirre/shn/PDZ-GEF/Src42A/tup/grp/Dab/Smurf/chic/scyl/hep/dlg1/KCNQ/arm/cv-c/cora/scrib/elav/bic/Cka/InR/cbt/raw/stck/oc/zfh1/mirr/aop/Traf6/cno/shg/Pvr/Rho1/Myc/Arp3/bsk/kn/tkv/sced/Nmt/Bx42/spi	81		Female.marker.genes	GO:0120038	plasma membrane bounded cell projection part	122/2074	444/11938	4.46917e-08	3.56824e-07	2.0311e-07	Cbp53E/VGAT/hdc/nSyb/Lrp4/CadN/NetB/5-HT1A/Spn/dpr5/dpr13/dpr8/jeb/dpr18/drl/Trim9/X11Lbeta/plum/dpr20/dpr15/Shawl/dpr14/dpr4/Mical/sky/Rdl/dysc/dpr9/Mmp2/Snap25/mnb/Con/ena/dpr6/Syx1A/dpr10/orb2/dpr12/Shaw/mAChR-A/Syt1/pico/fra/unc-104/chb/erm/Prosap/Fas2/DIP-gamma/kek6/Dscam1/cdc14/gogo/Pka-C1/prt/Dop1R1/cpx/dlg1/norpA/shi/Atg8a/rdgB/metro/VAChT/trio/Lis-1/Magi/CLIP-190/Oamb/robl/nAChRalpha7/dp…	122
Female.marker.genes	GO:0008047	enzyme activator activity	41/2020	141/12127	0.00015367	0.000998081	0.000681345	nrv3/jeb/nrv2/plx/sky/RapGAP1/Frq1/RhoGAP19D/RhoGAP71E/drongo/CG32506/Pdk1/rad/Evi5/CenG1A/cv-c/Tomosyn/wdb/norpA/7B2/CycT/Cks85A/Graf/PlexA/vimar/alphaSnap/CG42795/RhoGAP100F/RhoGAPp190/Rlip/Dhit/RhoGAP93B/ASPP/Nf1/CG5916/CG41520/RhoGAP102A/wrd/Cdc37/RpLP1/CG7394	41		Male.marker.genes	GO:0016319	mushroom body development	40/2449	79/12275	1.02627e-09	1.00401e-08	4.96566e-09	tsr/toy/chinmo/Appl/Actbeta/Nrg/shot/Lis-1/drl/Dhc64C/Frl/Fas2/robo3/stan/Src64B/Ephrin/ftz-f1/Dscam1/Hr3/Smox/EcR/DAAM/dati/robo2/trio/bun/eas/dac/ab/PsGEF/CkIIbeta/RhoGAPp190/Ptpmeg/ey/Hr51/robl/PrBP/bsk/Dll/twf	40		Female.marker.genes	GO:0005759	mitochondrial matrix	58/2074	171/11938	1.09232e-07	8.58493e-07	4.88668e-07	P5CDh1/slgA/CG11267/tko/kdn/Sod2/IscU/Gabat/UQCR-C2/mRpL28/Gdh/CG31075/mRpS10/mRpS7/mRpL14/mRpL15/sra/UQCR-C1/Hsp60A/Mdh2/CG7834/mRpS22/Idh3b/mRpL27/P32/mRpL24/CG12848/mRpL47/muc/mRpL52/mRpL2/mRpL12/CG5214/mRpS24/mRpS6/mEFTs/Got1/mRpS2/mRpS33/mRpL21/mRpS21/CG17691/mRpL19/bonsai/mRpL41/mRpL13/mRpL1/PCB/mRpL37/mRpL17/mRpS30/CG7394/mRpL44/mRpL40/mRpL30/mRpS35/mRpL46/mRpS14	58
Female.marker.genes	GO:0019199	transmembrane receptor protein kinase activity	12/2020	24/12127	0.000165803	0.00106612	0.000727789	wit/put/otk/babo/Eph/Alk/InR/Ret/Ddr/Ror/Pvr/CG3277	12		Male.marker.genes	GO:0009725	response to hormone	64/2449	156/12275	1.11431e-09	1.08646e-08	5.37343e-09	Idh3b/DENR/PyK/Blimp-1/Nurf-38/Hr4/Eip75B/DopEcR/mAChR-A/Oatp74D/Tl/Nos/Rheb/br/tai/AdipoR/ftz-f1/DOR/hid/EcR/Hr38/Sik3/Sirt1/Trf2/Pdk1/poly/CycG/G9a/CG15537/mAChR-B/Dh44-R2/sima/Akt1/rpr/E(bx)/Roc1a/wrd/Dh44-R1/Utx/foxo/HDAC4/wdb/InR/SIFaR/SkpA/Pp2A-29B/rk/Gpb5/fkh/Lgr4/Ilp7/ImpL2/Pi3K21B/Myc/Hr39/Hydr2/Sik2/gce/Lpin/Dh44/Pa1/Thor/STUB1/dock	64		Female.marker.genes	GO:0034703	cation channel complex	27/2074	57/11938	1.62152e-07	1.25481e-06	7.14257e-07	GluRIB/GluRIA/Shawl/Ca-alpha1T/eag/para/Sh/Shaw/KCNQ/Cngl/Elk/CG42260/Trpm/Ca-alpha1D/Ca-beta/Hk/Shab/CG4587/RyR/cac/Nmdar1/Trpgamma/unc80/Shal/MCU/EMRE/NaCP60E	27
Female.marker.genes	GO:0017147	Wnt-protein binding	10/2020	18/12127	0.000192409	0.00122494	0.000836211	fz2/drl/dlp/Drl-2/Cow/otk/fz/Ror/arr/otk2	10		Male.marker.genes	GO:0006164	purine nucleotide biosynthetic process	50/2449	110/12275	1.14458e-09	1.1122e-08	5.50078e-09	Tpi/Pgk/Cyt-c1/ATPsynbeta/PyK/sesB/Pglym78/Eno/Gapdh2/Gapdh1/blw/ATPsynCF6/sun/COX5B/ATPsynB/PlexA/Dg/Gycalpha99B/Nos/awd/Scox/Hex-A/Ac78C/Gycbeta100B/ATPsynG/ATPsynC/ATPsyndelta/ATPsyngamma/ATPsynD/ATPsynO/Ac3/CG17691/CG31183/ATPsynE/muc/Gyc89Db/CG6767/CG34357/Acsl/AMPdeam/Ppcs/rut/CG2246/Ac76E/CG43373/Adk2/AdSS/CG10738/Gyc88E/Dpck	50		Female.marker.genes	GO:0000313	organellar ribosome	34/2074	81/11938	1.70755e-07	1.26682e-06	7.21097e-07	tko/mRpL28/mRpS10/mRpS7/mRpL14/mRpL15/mRpS22/mRpL27/mRpL24/CG12848/mRpL47/mRpL52/mRpL2/mRpL12/mRpS24/mRpS6/mRpS2/mRpS33/mRpL21/mRpS21/mRpL19/bonsai/mRpL41/mRpL13/mRpL1/mRpL37/mRpL17/mRpS30/mRpL44/mRpL40/mRpL30/mRpS35/mRpL46/mRpS14	34
Female.marker.genes	GO:0098631	cell adhesion mediator activity	7/2020	10/12127	0.000264597	0.00165181	0.00112762	Dscam4/tutl/Dscam2/CG44153/Fas2/Dscam3/Bsg	7		Male.marker.genes	GO:0015672	monovalent inorganic cation transport	70/2449	177/12275	1.26022e-09	1.22047e-08	6.03624e-09	Cyt-c1/ATPsynF/ATPsynbeta/nrv3/blw/ATPsynCF6/sun/COX5B/Vha26/ATPsynB/Nckx30C/CG42594/Teh1/VhaAC45/nrv2/Atpalpha/Vha16-1/Teh2/Nhe3/Vha68-1/CG6329/VhaPPA1-1/para/CG1090/Ndae1/CG1688/Shawl/CG42340/CG31030/Task7/Ih/qvr/eag/NaCP60E/tipE/Hk/SK/Shaw/ATPsynG/ATPsynC/Shab/ATPsyndelta/ATPsyngamma/ATPsynD/ATPsynO/Shal/ATPsynE/SLO2/ND-20/Sh/slo/KCNQ/Nedd4/CG43155/Task6/Elk/VhaM9.7-a/Vha13/Vha36-1/VhaM9.7-b/V…	70		Female.marker.genes	GO:0005761	mitochondrial ribosome	34/2074	81/11938	1.70755e-07	1.26682e-06	7.21097e-07	tko/mRpL28/mRpS10/mRpS7/mRpL14/mRpL15/mRpS22/mRpL27/mRpL24/CG12848/mRpL47/mRpL52/mRpL2/mRpL12/mRpS24/mRpS6/mRpS2/mRpS33/mRpL21/mRpS21/mRpL19/bonsai/mRpL41/mRpL13/mRpL1/mRpL37/mRpL17/mRpS30/mRpL44/mRpL40/mRpL30/mRpS35/mRpL46/mRpS14	34
Female.marker.genes	GO:0098632	cell-cell adhesion mediator activity	7/2020	10/12127	0.000264597	0.00165181	0.00112762	Dscam4/tutl/Dscam2/CG44153/Fas2/Dscam3/Bsg	7		Male.marker.genes	GO:0045926	negative regulation of growth	47/2449	101/12275	1.37745e-09	1.32954e-08	6.5757e-09	nwk/chrb/Syp/rin/Sema1a/Galphao/Tl/crb/RASSF8/Src64B/Dad/cic/plum/ena/Octbeta1R/Liprin-gamma/Csk/Sesn/Abl/Src42A/caup/ara/sima/Akt1/Fak/bif/scyl/Mob2/dlg1/unc-104/stj/foxo/hfp/scrib/wts/Cip4/Ac76E/dj-1beta/SkpA/Mob4/spidey/mirr/fkh/dbo/Sema2a/kibra/Syx7	47		Female.marker.genes	GO:0099738	cell cortex region	32/2074	74/11938	1.7126e-07	1.26682e-06	7.21097e-07	app/sdt/Spn/Fife/Syp/Ten-a/Rim/sano/brat/nuf/CG42684/Rbp/dlg1/brp/Dl/aPKC/wts/pros/Mbs/sqh/Clc/cindr/baz/Bsg/Rab35/Abl/kibra/stau/unc-13/Rho1/Arpc2/Arp1	32
Female.marker.genes	GO:0004383	guanylate cyclase activity	8/2020	13/12127	0.000340596	0.0021058	0.00143753	Gycbeta100B/CG10738/CG34357/Gycalpha99B/CG31183/Gyc88E/Gyc89Db/Gyc89Da	8		Male.marker.genes	GO:0048645	animal organ formation	31/2449	54/12275	1.41908e-09	1.36515e-08	6.75183e-09	hth/Ubx/Abd-B/tsh/put/Rab11/fra/sli/robo1/numb/nuf/dally/phyl/Mad/NetB/shn/robo2/mew/fz/CtBP/Nedd4/H/B-H1/B-H2/arm/exd/neur/ato/tkv/Dll/klu	31		Female.marker.genes	GO:0098805	whole membrane	76/2074	249/11938	1.96818e-07	1.43477e-06	8.16695e-07	porin/VGAT/CG32225/fwe/Msp300/Vha26/Vha55/Vha44/mGluR/VGlut/Tbh/Flo1/S/Syt1/CG6051/nuf/rho/olf413/CG5059/CG5110/CG4080/Atg17/prt/Dop1R2/comm/Atg8a/VAChT/Vha36-1/Snap24/Tom20/AP-2sigma/Lamp1/CG5065/rpr/Vha100-1/Sar1/klar/Fis1/alphaSnap/Atet/Vps24/CG5676/Rab11/CG5946/Clc/PMP34/Tspo/Sec13/epsilonCOP/Vps29/Rab7/Syn/LTV1/Rph/Syngr/Flo2/BicD/Vha13/gammaSnap1/Mgstl/Vha68-1/AP-1-2beta/gammaSnap2/Vmat/Rab…	76
Female.marker.genes	GO:0003707	steroid hormone receptor activity	9/2020	16/12127	0.000360933	0.00214889	0.00146695	ftz-f1/Hr4/Hr38/Hr3/Eip75B/Hr51/Eip78C/EcR/svp	9		Male.marker.genes	GO:0017156	calcium ion regulated exocytosis	36/2449	68/12275	1.44146e-09	1.3775e-08	6.81289e-09	gammaSnap1/Scp2/cpx/Rab3/nSyb/Chc/Tomosyn/GABA-B-R2/unc-13-4A/Nrx-IV/Syx1A/Syx6/Fife/Syt12/Rim/CG31475/Sytbeta/NFAT/Syt4/Cadps/Snap25/Rop/Syn/unc-13/Syx13/CASK/BicD/Syt1/Syt7/Snap24/Syngr/Rph/alphaSnap/X11L/gammaSnap2/Syx7	36		Female.marker.genes	GO:0048786	presynaptic active zone	17/2074	28/11938	3.45937e-07	2.4858e-06	1.41496e-06	nSyb/Rab3/Gycbeta100B/Fife/Ten-a/Rim/Syx1A/Fas2/Rbp/cpx/brp/RhoGAP100F/cac/Bsg/CaMKII/stj/unc-13	17
Female.marker.genes	GO:0003746	translation elongation factor activity	9/2020	16/12127	0.000360933	0.00214889	0.00146695	eEF5/eEF1alpha1/eEF1alpha2/eEF2/eEF1delta/mEFTs/mEFTu1/eEF1gamma/eEF1beta	9		Male.marker.genes	GO:0046552	photoreceptor cell fate commitment	36/2449	68/12275	1.44146e-09	1.3775e-08	6.81289e-09	hth/klg/emc/noc/elB/pros/rin/cdi/stan/br/S/lola/Src64B/Socs36E/rho/Rala/msi/phyl/kay/spg/Src42A/nej/Dab/dac/fz/csw/RasGAP1/ey/scrib/wts/oc/aop/sv/ato/pnt/spi	36		Female.marker.genes	GO:0098802	plasma membrane receptor complex	25/2074	53/11938	5.13835e-07	3.64027e-06	2.0721e-06	Nmdar2/mGluR/nAChRalpha6/nAChRalpha5/GluRIB/GluRIA/wit/GABA-B-R3/nAChRalpha1/Neto/put/Prosap/dlg1/scrib/nAChRbeta1/babo/nAChRalpha3/nAChRalpha7/InR/GABA-B-R1/nAChRalpha2/nAChRbeta2/Nmdar1/nAChRalpha4/Grip	25
Female.marker.genes	GO:0008307	structural constituent of muscle	9/2020	16/12127	0.000360933	0.00214889	0.00146695	Syn1/Tina-1/Dg/Dyb/Scgalpha/Dys/Syn2/Scgdelta/Scgbeta	9		Male.marker.genes	GO:0010769	regulation of cell morphogenesis involved in differentiation	44/2449	92/12275	1.56879e-09	1.49424e-08	7.39025e-09	Trim9/Lar/CadN/PlexA/tutl/pros/fra/shot/Lis-1/Sema1a/Sar1/stan/Rheb/nudC/kuz/Dlic/Dscam1/CG34401/DAAM/Rac1/NetB/G9a/vvl/trio/bif/chic/sif/fz/PlexB/RhoGAPp190/unc-104/Nedd4/cv-c/Hr51/wts/Rab35/stck/Rho1/Liprin-alpha/kn/Vang/Sema2a/CG42797/Rab1	44		Female.marker.genes	GO:0016469	proton-transporting two-sector ATPase complex	27/2074	60/11938	5.93108e-07	4.14352e-06	2.35856e-06	ATPsynF/blw/Neb-cGP/ATPsynCF6/sun/ATPsynB/Vha26/ATPsyndelta/Vha55/Vha44/ATPsynE/ATPsyngamma/ATPsynbeta/VhaAC45/Vha16-1/Vha36-1/Vha100-1/VhaM9.7-b/CG31030/ATPsynC/VhaM9.7-a/Vha13/ATPsynD/Vha68-1/ATPsynG/ATPsynO/CG10731	27
Female.marker.genes	GO:0016679	oxidoreductase activity, acting on diphenols and related substances as donors	9/2020	16/12127	0.000360933	0.00214889	0.00146695	UQCR-Q/UQCR-14/UQCR-6.4/RFeSP/UQCR-C2/ox/UQCR-C1/UQCR-11/PPO2	9		Male.marker.genes	GO:0030334	regulation of cell migration	38/2449	74/12275	1.59487e-09	1.51408e-08	7.48837e-09	Pvf3/PlexA/zip/fra/sli/Sema1a/robo1/Diap1/kuz/puc/tai/mbc/Dscam1/Evi5/kay/Hrb27C/ena/vn/Rac1/spri/robo2/kis/sima/bnl/hep/PlexB/Ptpmeg/CG44774/Sin3A/aop/shg/Pvr/Rho1/bsk/ple/Sema2a/spi/Rab1	38		Female.marker.genes	GO:0098588	bounding membrane of organelle	93/2074	331/11938	6.26433e-07	4.31638e-06	2.45695e-06	porin/VGAT/CG32225/fwe/Msp300/Vha26/Vha55/Vha44/SPoCk/VGlut/Tbh/ct/alpha-Man-Ia/Efa6/S/w/Syt1/CG6051/nuf/rho/olf413/Fur1/CG5059/CG5110/CG4080/siz/prt/Dop1R2/comm/Atg8a/VAChT/Vha36-1/Snap24/GlcAT-P/Tom20/AP-2sigma/Lamp1/syd/CG5065/rpr/GlcAT-S/Sec61beta/Vha100-1/Sar1/Sec61alpha/ergic53/alpha-Man-IIb/klar/Fis1/alphaSnap/Atet/RyR/Vps24/CG5676/Rab11/CG5946/Clc/PMP34/Tspo/Sec13/epsilonCOP/Vps29/Rab7/Sy…	93
Female.marker.genes	GO:0099094	ligand-gated cation channel activity	18/2020	48/12127	0.000421139	0.00248433	0.00169594	Nmdar2/nAChRalpha6/nAChRalpha5/GluRIB/GluRIA/nAChRalpha1/Cngl/CG42260/nAChRbeta1/Trpm/nAChRalpha3/nAChRalpha7/RyR/jp/nAChRalpha2/nAChRbeta2/Nmdar1/nAChRalpha4	18		Male.marker.genes	GO:0042752	regulation of circadian rhythm	43/2449	89/12275	1.61381e-09	1.52704e-08	7.55247e-09	Gabat/trsn/Hsp83/Rdl/rho-5/robo1/5-HT1A/Nca/Ih/qvr/Pka-C1/Mbs/norpA/Hk/eys/hid/EcR/wake/Rac1/Dh31/Plc21C/Oamb/TfAP-2/5-HT1B/Shab/Acer/Sh/ctrip/Adar/Hr51/Dop1R2/dco/InR/dod/mld/tim/Rh7/Rho1/Ets96B/Pdfr/Grd/na/nocte	43		Female.marker.genes	GO:0098552	side of membrane	28/2074	64/11938	7.4943e-07	5.0941e-06	2.89964e-06	dlp/Mmp2/Rgk3/Gprk2/qvr/Galphao/sty/Gfrl/dally/Rgk1/Toll-7/gish/trio/Galphas/Src64B/Ggamma30A/Tl/Pli/baz/Rgk2/Rab35/Galphaq/Stat92E/Spp/kibra/FER/Gbeta13F/Src42A	28
Female.marker.genes	GO:0045182	translation regulator activity	12/2020	26/12127	0.000427032	0.0024962	0.00170404	Sxl/brat/orb2/eIF4EHP/elav/msi/bol/heph/orb/pum/Paip2/P32	12		Male.marker.genes	GO:0097479	synaptic vesicle localization	42/2449	86/12275	1.64555e-09	1.55198e-08	7.67585e-09	gammaSnap1/sesB/cpx/Rab3/nSyb/Chc/Tomosyn/GABA-B-R2/unc-13-4A/Nrx-IV/Syx1A/Syx6/Fife/Rim/Sytbeta/NFAT/Syt4/Cadps/Snap25/Rop/RhoGAP100F/Syn/unc-13/Syx13/wrd/CASK/Blos1/unc-104/BicD/Syt1/Syt7/shi/Snap24/Aplip1/Syngr/Drp1/Rph/alphaSnap/Liprin-alpha/X11L/gammaSnap2/Syx7	42		Female.marker.genes	GO:0005912	adherens junction	37/2074	97/11938	8.85201e-07	5.85863e-06	3.33483e-06	sdt/Lar/smal/hbs/Efa6/Moe/CadN2/LRR/ena/a/scrib/Dl/ed/Swip-1/ckn/Magi/wts/kug/kirre/RASSF8/pyd/p120ctn/sqh/Kank/rst/baz/bib/cno/Pax/ASPP/arm/wech/Abl/shot/Zyx/FER/Src42A	37
Female.marker.genes	GO:0019905	syntaxin binding	11/2020	23/12127	0.00050823	0.00294407	0.00200979	Sytbeta/Snap25/Syt1/cpx/Tomosyn/Snap24/alphaSnap/gammaSnap1/gammaSnap2/unc-13/Bet1	11		Male.marker.genes	GO:0010160	formation of animal organ boundary	27/2449	44/12275	2.12362e-09	1.99634e-08	9.87356e-09	hth/Abd-B/tsh/put/Rab11/fra/sli/robo1/numb/nuf/dally/phyl/Mad/NetB/shn/robo2/mew/fz/CtBP/H/B-H1/B-H2/exd/neur/ato/tkv/klu	27		Female.marker.genes	GO:0070161	anchoring junction	37/2074	97/11938	8.85201e-07	5.85863e-06	3.33483e-06	sdt/Lar/smal/hbs/Efa6/Moe/CadN2/LRR/ena/a/scrib/Dl/ed/Swip-1/ckn/Magi/wts/kug/kirre/RASSF8/pyd/p120ctn/sqh/Kank/rst/baz/bib/cno/Pax/ASPP/arm/wech/Abl/shot/Zyx/FER/Src42A	37
Female.marker.genes	GO:0003714	transcription corepressor activity	16/2020	41/12127	0.000518965	0.00297942	0.00203391	Tob/sbb/Sirt1/shn/Smr/Gug/emc/alien/CG5446/Bin1/acj6/CtBP/MBD-like/CG13293/per/CG13287	16		Male.marker.genes	GO:0048863	stem cell differentiation	46/2449	99/12275	2.18687e-09	2.04913e-08	1.01347e-08	abd-A/Abd-B/Antp/Rbp6/ham/bru1/pros/nkd/Pdcd4/Sema1a/SERCA/Smn/asrij/S/kuz/numb/D/bab2/rho/spen/EcR/brat/vn/robo2/osa/mid/hb/C1GalTA/Stat92E/da/lqf/arm/Dl/scrib/Cka/pyr/run/Nedd8/Tctp/lid/inv/en/pnt/Sema2a/klu/spi	46		Female.marker.genes	GO:0012506	vesicle membrane	29/2074	68/11938	9.14709e-07	5.97531e-06	3.40124e-06	VGAT/fwe/VGlut/Nos/Tbh/Syt1/olf413/prt/Dop1R2/VAChT/Cip4/Snap24/AP-2sigma/Sar1/Atet/RyR/Rab11/CG5946/Clc/Sec13/epsilonCOP/Syn/Rph/Syngr/BicD/AP-1-2beta/Vmat/unc-13/Syx6	29
Female.marker.genes	GO:0016772	transferase activity, transferring phosphorus-containing groups	104/2020	462/12127	0.000552547	0.00314414	0.00214637	PyK/Pgk/Dak1/PhKgamma/CG4546/sdt/awd/nmo/PKD/Adk1/CG34384/cdi/JIL-1/wit/rdgA/bma/Hex-A/mnb/Gprk2/Gk2/Csk/CG2201/Hipk/CG31140/Sik3/put/Drak/Dyrk2/Dgk/fwd/Pdk1/CG4629/CG32944/otk/CG31145/eas/Pka-C3/Pka-C1/Pkc53E/dlg1/Pkc98E/Slob/CycG/gish/aPKC/trio/SRPK/Pitslre/wts/Asator/babo/Eph/Alk/InR/CASK/msn/alc/Eip63E/Src64B/Lk6/Ret/Ddr/Argk/Rpb10/Ror/hppy/Pvr/Btk29A/Pdxk/sff/CG6767/CaMKII/Strn-Mlck/Haspin/A…	104		Male.marker.genes	GO:0016331	morphogenesis of embryonic epithelium	55/2449	128/12275	2.22182e-09	2.07514e-08	1.02633e-08	Btk29A/put/emc/pyd/Lac/Mmp2/Rab11/zip/aPKC/shot/ed/Sec61alpha/Nrx-IV/sdt/lwr/msn/Mbs/crb/puc/Myo10A/rho/mbc/Mad/yrt/kay/ena/Rac1/Abl/shn/PDZ-GEF/Src42A/tup/Dab/chic/hep/dlg1/arm/cv-c/cora/btsz/scrib/Cka/cbt/raw/stck/aop/Traf6/cno/Pvr/Rho1/baz/bsk/tkv/Nmt/spi	55		Female.marker.genes	GO:0044433	cytoplasmic vesicle part	49/2074	144/11938	9.32291e-07	6.01208e-06	3.42218e-06	VGAT/CG32225/fwe/VGlut/Tbh/S/w/Syt1/CG6051/nuf/rho/olf413/CG5110/CG4080/prt/Dop1R2/comm/VAChT/Snap24/AP-2sigma/Lamp1/Sar1/Atet/RyR/Vps24/Rab11/CG5946/Clc/Sec13/epsilonCOP/Vps29/Rab7/Syn/LTV1/Rph/Syngr/BicD/AP-1-2beta/Vmat/Rab35/CG14977/g/Chmp1/Trs31/unc-13/Syx6/CG14812/spin/Scamp	49
Female.marker.genes	GO:0019901	protein kinase binding	26/2020	82/12127	0.000566166	0.00315648	0.00215479	Msp300/drl/csw/Atg17/CycG/Atg8a/CG17514/Mob2/syd/Cks85A/Aplip1/Nrx-1/crb/alc/Mbs/Lk6/spri/Rac1/Tm1/Axn/Mob4/Mtl/Mob3/Rho1/Cdc37/Rack1	26		Male.marker.genes	GO:0040017	positive regulation of locomotion	36/2449	69/12275	2.43828e-09	2.26996e-08	1.12268e-08	Pvf3/Ten-a/zip/fra/sli/Ten-m/Sema1a/robo1/Diap1/stan/Rheb/kuz/puc/tai/mbc/Dscam1/kay/Hrb27C/ena/vn/Rac1/spri/robo2/kis/chic/fz/hep/Hr51/aop/shg/Pvr/CG9784/bsk/Vang/Sema2a/spi	36		Female.marker.genes	GO:0045177	apical part of cell	52/2074	157/11938	1.1226e-06	7.14771e-06	4.06859e-06	app/sdt/Spn/Pde6/hbs/Ptp10D/cdi/Moe/boca/sosie/kek1/sano/brat/sty/RhoGAP71E/nuf/rho/dally/CG42684/a/dlg1/Dl/aPKC/btsz/mgl/Ca-alpha1D/wts/pros/crb/Mbs/pyd/sqh/sds22/sdk/cac/cindr/rst/baz/Btk29A/ZnT63C/Rab35/Stat92E/arm/Abl/Syt4/kibra/Chmp1/stau/Arf79F/corn/Rho1/Arpc2	52
Female.marker.genes	GO:0019900	kinase binding	29/2020	95/12127	0.000567458	0.00315648	0.00215479	Msp300/drl/csw/pan/Atg17/CycG/Atg8a/CG17514/Mob2/syd/Cks85A/Aplip1/Nrx-1/crb/alc/Mbs/futsch/Lk6/spri/Rac1/Tm1/arm/Axn/Mob4/Mtl/Mob3/Rho1/Cdc37/Rack1	29		Male.marker.genes	GO:2000145	regulation of cell motility	39/2449	78/12275	2.64956e-09	2.45872e-08	1.21604e-08	Pvf3/PlexA/zip/fra/sli/Sema1a/robo1/Diap1/kuz/puc/tai/mbc/Dscam1/Evi5/kay/Hrb27C/ena/vn/Rac1/spri/robo2/kis/sima/bnl/hep/PlexB/Ptpmeg/CG44774/Sin3A/aop/shg/Pvr/Rho1/CG9784/bsk/ple/Sema2a/spi/Rab1	39		Female.marker.genes	GO:0005892	acetylcholine-gated channel complex	9/2074	10/11938	1.19978e-06	7.54364e-06	4.29396e-06	nAChRalpha6/nAChRalpha5/nAChRalpha1/nAChRbeta1/nAChRalpha3/nAChRalpha7/nAChRalpha2/nAChRbeta2/nAChRalpha4	9
Female.marker.genes	GO:0015085	calcium ion transmembrane transporter activity	19/2020	53/12127	0.000569442	0.00315648	0.00215479	fwe/SPoCk/Calx/Ca-alpha1T/Mid1/rdgB/PMCA/Ca-alpha1D/Ca-beta/CG4587/Nckx30C/RyR/jp/cac/Trpgamma/MCU/olf186-F/CG1090/stj	19		Male.marker.genes	GO:0019933	cAMP-mediated signaling	28/2449	47/12275	2.78626e-09	2.57729e-08	1.27469e-08	TyrR/DopEcR/Oct-TyrR/Galphas/CG12290/dnc/Pka-C1/Octbeta2R/Dop2R/Octbeta3R/Gprk2/Octbeta1R/Pka-R1/5-HT7/Ac78C/Dh31/Dop1R1/Ac3/Cirl/Ac13E/rut/Dop1R2/Ac76E/CG43373/rk/Lgr4/Pdfr/hang	28		Female.marker.genes	GO:0030659	cytoplasmic vesicle membrane	27/2074	62/11938	1.31618e-06	8.17331e-06	4.65238e-06	VGAT/fwe/VGlut/Tbh/Syt1/olf413/prt/Dop1R2/VAChT/Snap24/AP-2sigma/Sar1/Atet/RyR/Rab11/CG5946/Clc/Sec13/epsilonCOP/Syn/Rph/Syngr/BicD/AP-1-2beta/Vmat/unc-13/Syx6	27
Female.marker.genes	GO:0060589	nucleoside-triphosphatase regulator activity	32/2020	109/12127	0.000648019	0.00355822	0.00242904	nrv3/Gdi/nrv2/plx/sky/RapGAP1/RhoGAP19D/RhoGAP71E/drongo/CG32506/rad/Evi5/CenG1A/cv-c/Tomosyn/norpA/RhoGDI/Graf/PlexA/vimar/alphaSnap/CG13551/CG42795/RhoGAP100F/RhoGAPp190/Rlip/Dhit/RhoGAP93B/Nf1/CG5916/RhoGAP102A/CG7394	32		Male.marker.genes	GO:0007298	border follicle cell migration	56/2449	132/12275	2.81248e-09	2.59324e-08	1.28257e-08	tsr/Rab11/sqh/zip/Lis-1/Dhc64C/stai/veli/Diap1/kuz/puc/tai/Socs36E/cindr/Rala/mbc/Evi5/EcR/kay/Hrb27C/ena/jing/vn/Rac1/rhea/spri/Cortactin/yki/kis/ab/fz/hep/mim/CASK/Stat92E/Ptpmeg/Dl/Ptpmeg2/shi/wts/rk/aop/shg/Pvr/Rho1/baz/Mrtf/apt/bsk/Vang/kibra/spi/twf/Rab7/dome/dop	56		Female.marker.genes	GO:0044448	cell cortex part	41/2074	114/11938	1.41724e-06	8.69358e-06	4.94853e-06	app/sdt/Spn/Fife/Syp/Ten-a/Rim/sano/brat/nuf/CG42684/pnut/Rbp/dlg1/brp/Dl/aPKC/wts/pros/Sep1/Mbs/Sep2/sqh/Clc/cindr/Tm1/capt/baz/Bsg/Rab35/Abl/kibra/stau/unc-13/Sep4/Arp2/Rho1/Arpc2/beta-Spec/Arp1/GMF	41
Female.marker.genes	GO:0019888	protein phosphatase regulator activity	12/2020	27/12127	0.000652987	0.00355822	0.00242904	CanB2/CG17124/CanB/CycG/wdb/Pp2A-29B/PPP1R15/MYPT-75D/sra/PPP4R2r/endos/wrd	12		Male.marker.genes	GO:0007517	muscle organ development	48/2449	106/12275	2.86342e-09	2.63179e-08	1.30164e-08	Scgbeta/betaTub56D/mbl/abd-A/Ubx/Abd-B/Msp300/ap/hbs/shot/Dg/ed/drl/sns/ths/SmD3/klar/Dys/kuz/Dad/CAP/mbc/Alk/jeb/Rac1/C3G/sr/rhea/rst/kirre/fru/Vrp1/Mef2/mew/salm/ab/wech/Nedd4/pcs/pyr/slou/vg/kn/tkv/up/msk/hoip/kon	48		Female.marker.genes	GO:0033178	proton-transporting two-sector ATPase complex, catalytic domain	14/2074	22/11938	1.73114e-06	1.04911e-05	5.97172e-06	blw/ATPsynCF6/sun/Vha26/ATPsyndelta/Vha55/Vha44/ATPsyngamma/ATPsynbeta/VhaAC45/Vha36-1/CG31030/Vha68-1/ATPsynO	14
Female.marker.genes	GO:0004674	protein serine/threonine kinase activity	51/2020	198/12127	0.000693074	0.00374493	0.0025565	PhKgamma/nmo/PKD/cdi/JIL-1/wit/mnb/Gprk2/Hipk/Sik3/put/Drak/Dyrk2/Pdk1/CG4629/CG32944/CG31145/Pka-C3/Pka-C1/Pkc53E/Pkc98E/gish/aPKC/trio/SRPK/Pitslre/wts/Asator/babo/msn/alc/Eip63E/Lk6/hppy/sff/CaMKII/Strn-Mlck/Haspin/Aduk/Gprk1/Sik2/Mkk4/grp/Dyrk3/aurB/sgg/ninaC/Cdk5/Tlk/Pak3/CkIIbeta	51		Male.marker.genes	GO:0070593	dendrite self-avoidance	16/2449	19/12275	3.15897e-09	2.89422e-08	1.43143e-08	Cont/Bsg/tutl/Dscam2/Fas2/stan/CG44153/Dscam3/Dscam1/Sema2b/Dscam4/PlexB/Rho1/ImpL2/esn/Vang	16		Female.marker.genes	GO:0005753	mitochondrial proton-transporting ATP synthase complex	15/2074	25/11938	2.13805e-06	1.26522e-05	7.20184e-06	ATPsynF/blw/Neb-cGP/ATPsynCF6/sun/ATPsynB/ATPsyndelta/ATPsynE/ATPsyngamma/ATPsynbeta/ATPsynC/ATPsynD/ATPsynG/ATPsynO/CG10731	15
Female.marker.genes	GO:0001228	DNA-binding transcription activator activity, RNA polymerase II-specific	27/2020	88/12127	0.000793766	0.00421811	0.00287952	ftz-f1/bi/kay/pan/Eip74EF/Mad/Mef2/Dif/sima/akirin/da/vvl/E2f1/CG43689/dmrt99B/EcR/sim/Pdp1/kn/Stat92E/pnt/oc/gcm/gcm2/trh/Camta/CG12769	27		Male.marker.genes	GO:0031329	regulation of cellular catabolic process	75/2449	198/12275	3.21299e-09	2.93439e-08	1.4513e-08	sesB/CG6878/Sod1/Hsp67Bc/BI-1/CkIIalpha/CSN5/rump/Chc/Toll-7/Bruce/mask/Dg/Sec61alpha/Sec61beta/CG12384/Rheb/CSN4/eIF4A/Pka-C1/crb/Socs36E/DOR/hid/bol/phyl/Smox/EcR/Sik3/Mitf/Fer2/Atg8a/pum/Sesn/CG33144/CG9705/CG3530/Sod2/Atg1/sima/Akt1/rpr/hep/Roc1a/Rpb7/Acn/Utx/foxo/CG31855/shi/wts/Rab21/dco/mbf1/Rad23/InR/Pax/SkpA/Traf6/Desat1/Drp1/Ubc6/CG13928/Myc/Sec61gamma/bsk/Pomp/DUBAI/scny/Axn/CkIalpha/v…	75		Female.marker.genes	GO:0045259	proton-transporting ATP synthase complex	15/2074	25/11938	2.13805e-06	1.26522e-05	7.20184e-06	ATPsynF/blw/Neb-cGP/ATPsynCF6/sun/ATPsynB/ATPsyndelta/ATPsynE/ATPsyngamma/ATPsynbeta/ATPsynC/ATPsynD/ATPsynG/ATPsynO/CG10731	15
Female.marker.genes	GO:0030695	GTPase regulator activity	27/2020	88/12127	0.000793766	0.00421811	0.00287952	Gdi/plx/sky/RapGAP1/RhoGAP19D/RhoGAP71E/drongo/CG32506/rad/Evi5/CenG1A/cv-c/Tomosyn/norpA/RhoGDI/Graf/PlexA/vimar/CG42795/RhoGAP100F/RhoGAPp190/Rlip/Dhit/RhoGAP93B/Nf1/CG5916/RhoGAP102A	27		Male.marker.genes	GO:0007435	salivary gland morphogenesis	45/2449	97/12275	3.4714e-09	3.15046e-08	1.55817e-08	Btk29A/Idh3b/Wnt4/hdc/trn/BI-1/caps/Cam/ctp/zip/drpr/drl/fz2/br/crb/pan/Src64B/rho/hid/Drl-2/Eip74EF/lolal/EcR/jeb/Trf2/Rac1/Src42A/mew/Atg17/chic/Mdh2/rpr/fz/Utx/Dif/btsz/shi/raw/fkh/shg/Pvr/CrebA/Rho1/trh/IP3K2	45		Female.marker.genes	GO:0099568	cytoplasmic region	73/2074	250/11938	2.18003e-06	1.27507e-05	7.25788e-06	app/igl/sdt/Spn/Moe/Fife/Syp/Ten-a/Rim/sano/brat/drongo/numb/nuf/toc/CG42684/pnut/cv-c/Rbp/dlg1/scrib/brp/Dl/aPKC/Lis-1/ed/Lrch/wts/robl/CD98hc/pros/Sep1/eIF4E1/tmod/Dys/msn/Mbs/Sep2/sqh/Clc/Ran/Rab7/spri/cindr/chic/Tm1/capt/baz/Bsg/cno/pum/Rab35/tral/Dhc98D/Abl/alpha-Spec/borr/Spec2/kibra/jar/capu/stau/unc-13/Sep4/spir/corn/Arp2/Rho1/Arpc2/beta-Spec/Rab5/Arp1/GMF	73
Female.marker.genes	GO:0051082	unfolded protein binding	28/2020	93/12127	0.00089181	0.00469981	0.00320835	Hsp23/Hsp67Ba/CG11267/Hsp27/Calr/Gp93/Hsp67Bc/jdp/CCT5/Hsc70-3/Cnx99A/CG14207/Tpr2/CCT4/Pfdn2/Hsc70-4/Pfdn5/CG2852/Hsp26/Hsp60A/CG14483/DnaJ-H/cyp33/Hsp83/Hsc70-5/CG5071/Cdc37/CCT8	28		Male.marker.genes	GO:0022612	gland morphogenesis	45/2449	97/12275	3.4714e-09	3.15046e-08	1.55817e-08	Btk29A/Idh3b/Wnt4/hdc/trn/BI-1/caps/Cam/ctp/zip/drpr/drl/fz2/br/crb/pan/Src64B/rho/hid/Drl-2/Eip74EF/lolal/EcR/jeb/Trf2/Rac1/Src42A/mew/Atg17/chic/Mdh2/rpr/fz/Utx/Dif/btsz/shi/raw/fkh/shg/Pvr/CrebA/Rho1/trh/IP3K2	45		Female.marker.genes	GO:0048471	perinuclear region of cytoplasm	29/2074	71/11938	2.65498e-06	1.535e-05	8.73749e-06	Msp300/hdc/Vha55/mbl/NetB/Gp93/S/orb2/nuf/AGO1/Mapmodulin/dlg1/neur/svr/Ndfip/alphaTub84B/Pdi/Plod/Cnx99A/klar/tapas/sqh/Rab11/chic/ben/Hsp83/Mlf/GMF/alphaTub84D	29
Female.marker.genes	GO:0044877	protein-containing complex binding	62/2020	254/12127	0.000899031	0.00469981	0.00320835	Msp300/Spn/smal/eEF5/Akap200/plx/orb2/Trf2/Galphao/put/His3.3B/Ccn/CG17514/Lis-1/Galphas/Svil/babo/Mtor/kug/Ret/sta/Ddr/Rab11/e(y)2/eIF2alpha/Rab7/tld/LpR2/Unc-115a/orb/Tm1/pix/sals/sog/Ilp7/BicD/poly/didum/Galphaq/bif/eEF2/P32/sn/Spt5/jar/Arpc1/His2Av/Rad23/Arpc3A/Arpc5/pod1/eIF4H1/Fs/Arp2/Arpc2/loqs/hts/GMF/RpS21/RpLP1/CG2046/Rack1	62		Male.marker.genes	GO:0032271	regulation of protein polymerization	34/2449	64/12275	3.65334e-09	3.30518e-08	1.63469e-08	Btk29A/nwk/chinmo/Arpc5/svr/Jupiter/ringer/Arpc4/Arpc3A/Arpc1/IRSp53/spir/DAAM/Cortactin/gish/Vrp1/chb/Kank/chic/RhoBTB/PsGEF/shi/Cip4/dco/sals/Arpc2/Arp3/capu/tmod/hts/Rack1/twf/Lam/CG6891	34		Female.marker.genes	GO:0043296	apical junction complex	25/2074	58/11938	4.05177e-06	2.31595e-05	1.31828e-05	Atpalpha/sdt/nrv2/Moe/Fas3/kune/Nrg/cora/dlg1/scrib/Dl/aPKC/ed/crb/Mbs/Lac/pck/veli/crim/baz/cno/arm/CG45049/vari/Zyx	25
Female.marker.genes	GO:0015405	P-P-bond-hydrolysis-driven transmembrane transporter activity	37/2020	134/12127	0.000930424	0.00480694	0.00328148	nrv3/blw/sun/Atpalpha/Tim8/ATPsynB/Vha26/ATPsyndelta/Vha55/Vha44/ATPsynE/SPoCk/ATPsyngamma/ATPsynbeta/nrv2/VhaAC45/w/Vha16-1/rdgB/PMCA/Vha36-1/Tom20/Sec61beta/Vha100-1/VhaM9.7-b/CG8860/CG31030/Atet/ATPsynC/Vha13/ATPsynD/Vha68-1/ATPsynG/ATPsynO/Tom7/CG32091/Sec61gamma	37		Male.marker.genes	GO:1902533	positive regulation of intracellular signal transduction	70/2449	181/12275	3.87291e-09	3.4833e-08	1.72278e-08	Imp/14-3-3zeta/14-3-3epsilon/CG43658/Efa6/Socs16D/ed/DopEcR/smt3/Pp1-87B/Alg-2/Rheb/CG14184/asrij/msn/crb/Src64B/Exn/mbc/Alk/siz/jeb/Gprk2/Pdk1/vn/Nplp1/Pde8/Rac1/sNPF/Ret/CycG/spg/Csk/CG42674/rdx/Src42A/PVRAP/trio/Akt1/sNPF-R/bnl/PsGEF/hep/PlexB/Sur-8/Mnn1/slim/hppy/dco/Cka/InR/syd/Mob4/Traf6/Pvr/ben/CG34393/Lpin/ave/Gadd45/olf186-F/Jafrac2/CG9098/M1BP/sqa/kibra/Mkk4/spi/E2f1/CG14812	70		Female.marker.genes	GO:0030426	growth cone	15/2074	26/11938	4.24157e-06	2.3972e-05	1.36453e-05	NetB/Trim9/Con/fra/chb/erm/gogo/trio/Lis-1/CLIP-190/robo1/Rtnl1/jar/shot/pod1	15
Female.marker.genes	GO:0004129	cytochrome-c oxidase activity	10/2020	21/12127	0.000956902	0.00480694	0.00328148	cype/COX5A/COX5B/COX8/COX7C/ND-MLRQ/COX4/COX6B/levy/COX7A	10		Male.marker.genes	GO:0072359	circulatory system development	49/2449	110/12275	3.87436e-09	3.4833e-08	1.72278e-08	abd-A/Ubx/Abd-B/Antp/Lac/nrv2/Mmp2/Cont/CG3226/Nrg/sli/Gbeta13F/Sar1/robo1/Galphao/Tl/Nrx-IV/qm/mam/pan/kuz/numb/Tina-1/Mad/EcR/tup/Mef2/yki/simj/robo2/Sod2/mid/Acer/fz/sd/CHES-1-like/Nedd4/lqf/arm/cora/pyr/zfh1/shg/apt/pnt/tkv/Axn/Scgdelta/p38b	49		Female.marker.genes	GO:0008076	voltage-gated potassium channel complex	9/2074	11/11938	5.57258e-06	3.11445e-05	1.7728e-05	Shawl/eag/Sh/Shaw/KCNQ/Elk/Hk/Shab/Shal	9
Female.marker.genes	GO:0015002	heme-copper terminal oxidase activity	10/2020	21/12127	0.000956902	0.00480694	0.00328148	cype/COX5A/COX5B/COX8/COX7C/ND-MLRQ/COX4/COX6B/levy/COX7A	10		Male.marker.genes	GO:0045055	regulated exocytosis	36/2449	70/12275	4.06131e-09	3.64004e-08	1.80031e-08	gammaSnap1/Scp2/cpx/Rab3/nSyb/Chc/Tomosyn/GABA-B-R2/unc-13-4A/Nrx-IV/Syx1A/Syx6/Fife/Syt12/Rim/CG31475/Sytbeta/NFAT/Syt4/Cadps/Snap25/Rop/Syn/unc-13/Syx13/CASK/BicD/Syt1/Syt7/Snap24/Syngr/Rph/alphaSnap/X11L/gammaSnap2/Syx7	36		Female.marker.genes	GO:0030427	site of polarized growth	15/2074	27/11938	8.0114e-06	4.42828e-05	2.52065e-05	NetB/Trim9/Con/fra/chb/erm/gogo/trio/Lis-1/CLIP-190/robo1/Rtnl1/jar/shot/pod1	15
Female.marker.genes	GO:0016675	oxidoreductase activity, acting on a heme group of donors	10/2020	21/12127	0.000956902	0.00480694	0.00328148	cype/COX5A/COX5B/COX8/COX7C/ND-MLRQ/COX4/COX6B/levy/COX7A	10		Male.marker.genes	GO:0030833	regulation of actin filament polymerization	31/2449	56/12275	4.77424e-09	4.26577e-08	2.10978e-08	Btk29A/nwk/chinmo/Arpc5/svr/Arpc4/Arpc3A/Arpc1/IRSp53/spir/DAAM/Cortactin/gish/Vrp1/Kank/chic/RhoBTB/PsGEF/shi/Cip4/dco/sals/Arpc2/Arp3/capu/tmod/hts/Rack1/twf/Lam/CG6891	31		Female.marker.genes	GO:0009898	cytoplasmic side of plasma membrane	20/2074	43/11938	9.23289e-06	5.04798e-05	2.87339e-05	Rgk3/Gprk2/Galphao/sty/Rgk1/gish/trio/Galphas/Src64B/Ggamma30A/Pli/baz/Rgk2/Rab35/Galphaq/Stat92E/kibra/FER/Gbeta13F/Src42A	20
Female.marker.genes	GO:0016676	oxidoreductase activity, acting on a heme group of donors, oxygen as acceptor	10/2020	21/12127	0.000956902	0.00480694	0.00328148	cype/COX5A/COX5B/COX8/COX7C/ND-MLRQ/COX4/COX6B/levy/COX7A	10		Male.marker.genes	GO:0010941	regulation of cell death	91/2449	258/12275	4.8284e-09	4.30085e-08	2.12713e-08	Idh3b/Abd-B/fwe/CG10257/Su(var)205/BI-1/Fili/Appl/futsch/Actbeta/Bruce/mask/Sec61alpha/Ubr3/Diap1/CG5059/Rheb/PDCD-5/br/Pka-C1/norpA/puc/vimar/CG4238/hid/eEF5/Ccn/EcR/Sirt1/Drep1/viaf/Pdk1/Galphaq/Fer2/Men/Pde8/pix/tau/eIF3m/Csk/Apc/rdx/Hipk/yki/Prx3/Atg1/bun/Akt1/Mdh2/rpr/mav/wrd/csw/Utx/hppy/spz5/Dop1R2/Drep2/pAbp/wts/Den1/dco/Sep1/CG9922/CG4230/RpL14/SkpA/fkh/Ubc6/Pvr/pnut/ben/Myc/gce/Duox/Tsp…	91		Female.marker.genes	GO:0030658	transport vesicle membrane	17/2074	34/11938	1.30524e-05	7.05952e-05	4.01839e-05	VGAT/fwe/VGlut/Syt1/prt/Dop1R2/VAChT/Sar1/Atet/Clc/Sec13/Syn/Rph/Syngr/Vmat/unc-13/Syx6	17
Female.marker.genes	GO:0015399	primary active transmembrane transporter activity	37/2020	135/12127	0.00108006	0.00538356	0.00367512	nrv3/blw/sun/Atpalpha/Tim8/ATPsynB/Vha26/ATPsyndelta/Vha55/Vha44/ATPsynE/SPoCk/ATPsyngamma/ATPsynbeta/nrv2/VhaAC45/w/Vha16-1/rdgB/PMCA/Vha36-1/Tom20/Sec61beta/Vha100-1/VhaM9.7-b/CG8860/CG31030/Atet/ATPsynC/Vha13/ATPsynD/Vha68-1/ATPsynG/ATPsynO/Tom7/CG32091/Sec61gamma	37		Male.marker.genes	GO:0046847	filopodium assembly	25/2449	40/12275	4.88913e-09	4.34155e-08	2.14726e-08	Lar/CaMKII/aPKC/shot/Arpc1/IRSp53/kug/Myo10A/ena/DAAM/Rac1/chic/kra/bnl/sif/hep/C1GalTA/mim/unc-104/sn/Rab35/Rho1/baz/Arp3/kon	25		Female.marker.genes	GO:0042734	presynaptic membrane	13/2074	22/11938	1.32041e-05	7.06562e-05	4.02187e-05	Fife/Ten-a/Syx1A/Fas2/dlg1/brp/lap/Nrx-1/gukh/Exn/DAT/Ank2/unc-13	13
Female.marker.genes	GO:0051020	GTPase binding	50/2020	197/12127	0.00110556	0.00546828	0.00373295	Gdi/Efa6/plx/CG7369/Fife/CG43658/CG42674/sif/CG32506/nuf/mbc/Evi5/CG5110/siz/Tomosyn/btsz/trio/Rgl/Magi/RhoGDI/Sec61beta/Zir/Exn/spg/Fs(2)Ket/spri/Epac/Tctp/Rph/GEFmeso/BicD/cno/Rlip/Rab3-GEF/CG34393/Cdep/CG5916/eEF1delta/CG14977/Spec2/Bet5/Trs31/Rip11/cdm/pns/CG9098/CG14812/Pak3/eEF1beta/Hem	50		Male.marker.genes	GO:0051493	regulation of cytoskeleton organization	64/2449	161/12275	5.03443e-09	4.45686e-08	2.20429e-08	Btk29A/nwk/chinmo/CG43658/p120ctn/Akap200/sqh/Arpc5/futsch/cnn/shot/svr/Mtor/Gbeta13F/ed/Dhc64C/stai/Jupiter/Arpc4/Arpc3A/Arpc1/IRSp53/Pka-C1/lilli/Src64B/CG17816/flw/ena/spir/DAAM/Apc/Abl/Cortactin/gish/Moe/Vrp1/chb/mthl1/tacc/Kank/chic/fz/RhoBTB/PsGEF/hep/Nedd4/smog/shi/Cip4/dco/sals/Arpc2/Rho1/Arp3/capu/tmod/hts/Rack1/CG1674/twf/alpha-Spec/Vhl/Lam/CG6891	64		Female.marker.genes	GO:0036477	somatodendritic compartment	74/2074	267/11938	1.45508e-05	7.70424e-05	4.38538e-05	Imp/Cbp53E/VGAT/kcc/hdc/CadN/NetB/5-HT1A/Spn/drl/X11Lbeta/plum/Shawl/Ten-m/hig/klg/SK/Rdl/Mmp2/Ten-a/ena/brat/orb2/Shaw/mAChR-A/fra/unc-104/erm/rad/Prosap/Dscam1/sNPF/Rab18/Pka-C1/Dop1R1/shi/slo/ringer/Lis-1/Oamb/Rab14/nAChRalpha7/bol/Pdi/robo1/mtt/Myo10A/futsch/Ret/RabX4/Rab11/Rab7/EcR/5-HT7/ktub/Trpgamma/DAT/ple/5-HT2A/5-HT1B/path/didum/Rab35/Rab3-GEF/mAChR-B/CaMKII/Pdfr/CG13506/sn/stau/CCKLR-1…	74
Female.marker.genes	GO:0008201	heparin binding	9/2020	18/12127	0.00111541	0.00547486	0.00373744	vn/Sema1a/Toll-6/Ccn/Appl/PlexA/robo1/sli/miple1	9		Male.marker.genes	GO:0008306	associative learning	32/2449	59/12275	5.33743e-09	4.71065e-08	2.32981e-08	14-3-3zeta/Gad1/Sap47/Nrx-1/futsch/Rdl/DopEcR/drl/Fas2/Pp1-87B/Adf1/dnc/Pka-C1/rad/AGO1/Alk/vn/Pka-R1/mnb/gish/Oamb/Dop1R1/eas/Syn/Shal/Blos1/prt/rut/shi/Nmdar1/spi/Fdh	32		Female.marker.genes	GO:0044297	cell body	49/2074	158/11938	1.75109e-05	9.175e-05	5.22256e-05	Imp/kcc/Tob/NetB/Shawl/Ten-m/hig/klg/SK/Rdl/Ten-a/brat/orb2/Shaw/fra/erm/rad/Dscam1/sNPF/Rab18/Pka-C1/slo/ringer/Lis-1/Rab14/bol/Pdi/robo1/Myo10A/futsch/RabX4/Rab11/Rab7/ktub/Trpgamma/DAT/ple/path/didum/Rab35/Rab3-GEF/Pdfr/CG13506/per/sn/stau/CCKLR-17D1/Rab5/RpL10	49
Female.marker.genes	GO:0042562	hormone binding	8/2020	15/12127	0.0012427	0.00605344	0.00413241	nAChRalpha5/Dh44-R1/DopEcR/InR/EcR/gce/CG15537/Dh44-R2	8		Male.marker.genes	GO:0097305	response to alcohol	53/2449	124/12275	5.42737e-09	4.77542e-08	2.36185e-08	Idh3b/DENR/Drat/Blimp-1/Bacc/klg/Nurf-38/Hr4/Akap200/Eip75B/Jwa/Cam/DopEcR/Oatp74D/dpr9/Fas2/Tbh/br/dnc/Pka-C1/S/ftz-f1/DOR/rho/hid/EcR/Sirt1/Trf2/Pka-R1/pum/G9a/sca/Vrp1/pxb/Syn/kra/rpr/E(bx)/CASK/dlg1/Utx/hppy/Pka-R2/rut/Pkc98E/fkh/rogdi/Nmdar1/apt/hang/CrzR/spi/Arf51F	53		Female.marker.genes	GO:0034705	potassium channel complex	9/2074	12/11938	1.88301e-05	9.7645e-05	5.55811e-05	Shawl/eag/Sh/Shaw/KCNQ/Elk/Hk/Shab/Shal	9
Female.marker.genes	GO:0030276	clathrin binding	10/2020	22/12127	0.00149443	0.00722495	0.00493215	Sytbeta/Syt1/AP-2sigma/lap/Syt12/Clc/BicD/AP-1-2beta/Syt7/Syt4	10		Male.marker.genes	GO:0007391	dorsal closure	49/2449	111/12275	5.60614e-09	4.91773e-08	2.43223e-08	Btk29A/put/emc/pyd/Rab11/zip/shot/ed/Sec61alpha/Nrx-IV/lwr/msn/Mbs/crb/puc/Myo10A/rho/mbc/Mad/yrt/kay/ena/Rac1/Abl/shn/PDZ-GEF/Src42A/tup/Dab/chic/hep/dlg1/arm/cv-c/cora/scrib/Cka/cbt/raw/stck/aop/Traf6/cno/Pvr/Rho1/bsk/tkv/Nmt/spi	49		Female.marker.genes	GO:0098562	cytoplasmic side of membrane	21/2074	49/11938	2.63363e-05	0.000135175	7.69439e-05	Rgk3/Gprk2/Galphao/sty/Rgk1/gish/trio/Galphas/Src64B/Ggamma30A/Pli/baz/Rgk2/Rab35/Galphaq/Stat92E/Spp/kibra/FER/Gbeta13F/Src42A	21
Female.marker.genes	GO:0008081	phosphoric diester hydrolase activity	13/2020	33/12127	0.00154485	0.00741299	0.00506052	CG32052/Pde6/Plc21C/CG14883/dnc/Pde1c/Pka-R2/Pka-R1/norpA/Pde9/Pde8/Pde11/PrBP	13		Male.marker.genes	GO:0030041	actin filament polymerization	33/2449	62/12275	5.81598e-09	5.08634e-08	2.51562e-08	Btk29A/nwk/tsr/chinmo/Arpc5/SelR/svr/Arpc4/Arpc3A/Arpc1/IRSp53/spir/DAAM/Cortactin/gish/Vrp1/Kank/chic/RhoBTB/PsGEF/shi/Cip4/dco/sals/Arpc2/Arp3/capu/tmod/hts/Rack1/twf/Lam/CG6891	33		Female.marker.genes	GO:0019897	extrinsic component of plasma membrane	18/2074	40/11938	4.4833e-05	0.000227788	0.00012966	CadN2/klg/Galphao/mbc/norpA/trio/Galphas/lap/Src64B/Ggamma30A/Rac1/Galphaq/arm/Abl/FER/Gbeta13F/ninaC/Src42A	18
Female.marker.genes	GO:0005230	extracellular ligand-gated ion channel activity	18/2020	53/12127	0.00161744	0.0077038	0.00525904	Nmdar2/nAChRalpha6/nAChRalpha5/GluClalpha/GluRIB/GluRIA/pHCl-1/Rdl/nAChRalpha1/nAChRbeta1/nAChRalpha3/nAChRalpha7/nAChRalpha2/nAChRbeta2/Nmdar1/nAChRalpha4/CG8916/Grd	18		Male.marker.genes	GO:0045927	positive regulation of growth	52/2449	121/12275	6.01673e-09	5.246e-08	2.59459e-08	mRpL12/Torsin/14-3-3epsilon/Hr4/PIP4K/Sdc/Actbeta/shot/eIF4E1/stan/wit/Rheb/Octbeta2R/cac/tai/nmo/Mad/Smox/Pdk1/Rac1/Ank2/sNPF/mnb/CycG/Hipk/yki/simj/kis/trio/bun/pico/Akt1/sNPF-R/chic/fz/dlg1/Nipped-B/ey/Hr51/btsz/dco/InR/Desat1/pnut/Tctp/Myc/Arp3/tkv/Vang/bchs/Synd/p38b	52		Female.marker.genes	GO:0061174	type I terminal bouton	14/2074	27/11938	4.54569e-05	0.000228648	0.00013015	jeb/ena/Fas2/kek6/cpx/dlg1/Atg8a/metro/Alk/Nrx-1/CASK/pum/stau/Pldn	14
Female.marker.genes	GO:0005096	GTPase activator activity	25/2020	83/12127	0.00163097	0.00771112	0.00526404	plx/sky/RapGAP1/RhoGAP19D/RhoGAP71E/drongo/CG32506/rad/Evi5/CenG1A/cv-c/Tomosyn/norpA/Graf/PlexA/vimar/CG42795/RhoGAP100F/RhoGAPp190/Rlip/Dhit/RhoGAP93B/Nf1/CG5916/RhoGAP102A	25		Male.marker.genes	GO:0035152	regulation of tube architecture, open tracheal system	42/2449	89/12275	6.09244e-09	5.29602e-08	2.61932e-08	Blimp-1/kune/pasi2/crim/pasi1/cold/Lac/nrv2/pck/sqh/Atpalpha/Nrg/zip/shot/Chc/Dhc64C/Fas2/Nrx-IV/awd/bou/stan/klar/Dlic/Mkp3/rho/DAAM/rhea/Moe/mew/CCT3/sano/fz/cv-c/cora/btsz/shi/Rab35/shg/Rho1/Rbcn-3B/vari/Vhl	42		Female.marker.genes	GO:0005750	mitochondrial respiratory chain complex III	9/2074	13/11938	5.17162e-05	0.000255032	0.000145168	UQCR-Q/UQCR-14/UQCR-6.4/RFeSP/Cyt-c1/UQCR-C2/ox/UQCR-C1/UQCR-11	9
Female.marker.genes	GO:0004714	transmembrane receptor protein tyrosine kinase activity	9/2020	19/12127	0.00180815	0.00848641	0.00579329	otk/Eph/Alk/InR/Ret/Ddr/Ror/Pvr/CG3277	9		Male.marker.genes	GO:0030100	regulation of endocytosis	35/2449	68/12275	6.48211e-09	5.61783e-08	2.77849e-08	pyd/PIP4K/Nrx-1/drpr/Chc/mgl/sdt/CaBP1/norpA/numb/cindr/Gprk2/brat/Pkc53E/mnb/spri/Cortactin/Moe/Smurf/mim/CASK/BicD/Nedd4/nsl1/comm/scrib/Rab4/neur/tim/prtp/O-fut1/Graf/Nak/crq/Syx7	35		Female.marker.genes	GO:0045275	respiratory chain complex III	9/2074	13/11938	5.17162e-05	0.000255032	0.000145168	UQCR-Q/UQCR-14/UQCR-6.4/RFeSP/Cyt-c1/UQCR-C2/ox/UQCR-C1/UQCR-11	9
Female.marker.genes	GO:0005200	structural constituent of cytoskeleton	12/2020	30/12127	0.0019949	0.00929507	0.00634533	betaTub56D/Jupiter/alphaTub84B/Arpc4/Strn-Mlck/Arpc1/Arpc3A/Arpc5/Arp2/Arpc2/beta-Spec/alphaTub84D	12		Male.marker.genes	GO:0001558	regulation of cell growth	40/2449	83/12275	6.53591e-09	5.6475e-08	2.79316e-08	mRpL12/Torsin/Lar/PIP4K/CadN/shot/Sema1a/Tl/cmpy/eIF4E1/stan/Rheb/kuz/CG9328/cic/Pdk1/Rac1/pix/Sesn/Atg1/bun/sima/Akt1/bif/chic/fz/foxo/hfp/ey/Hr51/dco/InR/spidey/fkh/Myc/Liprin-alpha/Paip2/Vang/Sema2a/Thor	40		Female.marker.genes	GO:0043025	neuronal cell body	45/2074	147/11938	5.40212e-05	0.000259437	0.000147676	Imp/kcc/NetB/Shawl/Ten-m/hig/klg/SK/Rdl/Ten-a/brat/Shaw/fra/erm/rad/Dscam1/sNPF/Rab18/slo/ringer/Lis-1/Rab14/bol/Pdi/robo1/Myo10A/futsch/RabX4/Rab11/Rab7/ktub/Trpgamma/DAT/ple/path/didum/Rab35/Rab3-GEF/Pdfr/CG13506/sn/stau/CCKLR-17D1/Rab5/RpL10	45
Female.marker.genes	GO:0008146	sulfotransferase activity	8/2020	16/12127	0.00212446	0.00982754	0.00670882	Hs3st-B/CG31637/sfl/CG14024/Hs3st-A/St3/CG13937/Hs6st	8		Male.marker.genes	GO:0006979	response to oxidative stress	57/2449	138/12275	6.68033e-09	5.75505e-08	2.84636e-08	ND-SGDH/SdhC/sesB/sun/Sod1/chrb/Atox1/rump/Pxn/inaE/puc/Trx-2/whd/Ddc/Fer2/Pde8/Crtc/Sesn/Oamb/ATPsynD/Prx3/Sod2/ND-B17.2/ND-B14/Atg1/Akt1/Ric/ND-20/Jafrac1/Gyc89Db/scyl/PHGPx/Idh/MCU/Mnn1/Adar/foxo/cnc/rut/Dop1R2/InR/Rpi/dj-1beta/Atg6/Sirup/Grx1/NLaz/ben/Duox/bsk/Gyc88E/hang/Jafrac2/ple/Thor/Ucp4A/p38b	57		Female.marker.genes	GO:0000315	organellar large ribosomal subunit	21/2074	51/11938	5.41568e-05	0.000259437	0.000147676	mRpL28/mRpL14/mRpL15/mRpL27/mRpL24/mRpL47/mRpL52/mRpL2/mRpL12/mRpL21/mRpL19/mRpL41/mRpL13/mRpL1/mRpL37/mRpL17/mRpS30/mRpL44/mRpL40/mRpL30/mRpL46	21
Female.marker.genes	GO:0001227	DNA-binding transcription repressor activity, RNA polymerase II-specific	21/2020	67/12127	0.00217443	0.00998686	0.00681759	Blimp-1/tsh/CG12605/CG32767/CG43347/CG9932/cic/Mad/chn/Pur-alpha/pros/CG43689/Sidpn/CG18599/aop/svp/Hey/en/CG7691/Gsc/E2f2	21		Male.marker.genes	GO:0033043	regulation of organelle organization	129/2449	406/12275	6.89642e-09	5.92354e-08	2.92968e-08	Btk29A/mamo/nwk/CG6878/QIL1/Rab3/Sod1/14-3-3epsilon/chinmo/bru1/CG43658/p120ctn/Akap200/Su(var)205/l(3)neo38/vig2/Tlk/endos/sqh/Arpc5/CG15237/BuGZ/futsch/cnn/shot/svr/Mtor/Invadolysin/ZAP3/mask/Gbeta13F/ed/GABA-B-R2/Sar1/Dhc64C/stai/Jupiter/Arpc4/Arpc3A/Arpc1/HP1c/IRSp53/Pka-C1/Gug/lilli/CG11486/Src64B/CG17816/flw/jim/cdc14/crol/JIL-1/Sirt1/Su(z)2/ena/spir/Mitf/DAAM/Syt4/CG8036/Ncoa6/Apc/upSET/Ab…	129		Female.marker.genes	GO:0005762	mitochondrial large ribosomal subunit	21/2074	51/11938	5.41568e-05	0.000259437	0.000147676	mRpL28/mRpL14/mRpL15/mRpL27/mRpL24/mRpL47/mRpL52/mRpL2/mRpL12/mRpL21/mRpL19/mRpL41/mRpL13/mRpL1/mRpL37/mRpL17/mRpS30/mRpL44/mRpL40/mRpL30/mRpL46	21
Female.marker.genes	GO:0042626	ATPase activity, coupled to transmembrane movement of substances	31/2020	112/12127	0.00222686	0.0100836	0.00688362	nrv3/blw/sun/Atpalpha/ATPsynB/Vha26/ATPsyndelta/Vha55/Vha44/ATPsynE/SPoCk/ATPsyngamma/ATPsynbeta/nrv2/VhaAC45/w/Vha16-1/rdgB/PMCA/Vha36-1/Vha100-1/VhaM9.7-b/CG31030/Atet/ATPsynC/Vha13/ATPsynD/Vha68-1/ATPsynG/ATPsynO/CG32091	31		Male.marker.genes	GO:0051146	striated muscle cell differentiation	49/2449	112/12275	8.05535e-09	6.89844e-08	3.41186e-08	Tpi/Pgk/PyK/Pglym78/Gapdh1/hbs/mspo/bru1/SelR/Bsg/zip/mask/Dg/sns/Smn/br/CanB2/mbc/siz/sty/DAAM/Rac1/C3G/rhea/rst/kirre/Vrp1/Mef2/Akt1/sd/Pak3/Mical/Nedd4/foxo/InR/Pax/aop/sals/Rho1/Arp3/pnt/Scgdelta/hts/up/Thor/Arf51F/kon/tn/dock	49		Female.marker.genes	GO:0005700	polytene chromosome	59/2074	210/11938	6.83762e-05	0.000324464	0.00018469	Nlp/Eip93F/mam/Su(var)205/Rm62/JIL-1/Moe/corto/Psc/nej/Trf2/east/His3.3B/trx/Smr/Dsp1/B52/Hrb98DE/Ubi-p5E/CycG/Gug/vig/CycT/Su(Tpl)/upSET/akirin/Sin3A/E(Pc)/Df31/sqd/Pep/bab2/Hel25E/D1/Rpt1/lawc/Sec13/tou/EcR/CrebA/fkh/Tctp/HP4/pho/CtBP/Pp1-87B/MBD-like/cnc/kto/EloC/Spt5/Abd-B/Hsp83/abd-A/Ubx/His3.3A/His2Av/MED26/Mlf	59
Female.marker.genes	GO:0043492	ATPase activity, coupled to movement of substances	31/2020	112/12127	0.00222686	0.0100836	0.00688362	nrv3/blw/sun/Atpalpha/ATPsynB/Vha26/ATPsyndelta/Vha55/Vha44/ATPsynE/SPoCk/ATPsyngamma/ATPsynbeta/nrv2/VhaAC45/w/Vha16-1/rdgB/PMCA/Vha36-1/Vha100-1/VhaM9.7-b/CG31030/Atet/ATPsynC/Vha13/ATPsynD/Vha68-1/ATPsynG/ATPsynO/CG32091	31		Male.marker.genes	GO:0060249	anatomical structure homeostasis	64/2449	163/12275	8.94116e-09	7.63438e-08	3.77584e-08	Nap1/Pgk/Torsin/Cbp53E/mbl/sesB/fwe/tsr/rdgA/Su(var)205/Lac/sqh/Atpalpha/Cam/zip/Mtor/ZAP3/SP2353/Lis-1/Dg/robo1/Nrk/Manf/disco/nAChRalpha6/Dys/norpA/cac/alc/crb/tai/vimar/Mkp3/rho/JIL-1/yrt/dysc/Galphaq/Ank2/rhea/Plc21C/Csk/Dop1R1/tup/mew/Atg1/Atg17/CG46339/cv-c/Dop1R2/InR/Cnx99A/zfh1/capt/shg/Irbp/Smg5/ninaC/Fkbp14/up/sqa/Rack1/TER94/tn	64		Female.marker.genes	GO:0045277	respiratory chain complex IV	10/2074	16/11938	7.08559e-05	0.000333089	0.0001896	cype/COX5A/COX5B/COX8/COX7C/ND-MLRQ/COX4/COX6B/levy/COX7A	10
Female.marker.genes	GO:0019955	cytokine binding	7/2020	13/12127	0.00237551	0.0106815	0.00729178	Imp/cmpy/wit/put/Tl/cv-2/sog	7		Male.marker.genes	GO:0007173	epidermal growth factor receptor signaling pathway	33/2449	63/12275	9.88568e-09	8.3912e-08	4.15015e-08	rho-5/ed/Fas2/S/Gug/Src64B/Socs36E/Mkp3/rho/spen/Ptp10D/kek1/cic/sty/vn/pum/Src42A/gro/tay/dlg1/csw/Ptpmeg/hppy/RasGAP1/scrib/Sulf1/aop/Graf/pnt/ave/Socs44A/spi/Ptp4E	33		Female.marker.genes	GO:0005667	transcription factor complex	51/2074	175/11938	7.52234e-05	0.000350346	0.000199423	hth/Ssb-c31a/ftz-f1/mam/Hr4/Hr38/kay/Trf2/sd/SoxN/pan/Smox/Eip75B/Mad/dac/NFAT/TfIIA-S/sima/da/E2f1/alien/CG16779/Dad/Sox21b/D/CG4404/Taf13/MED7/Taf10b/Smn/EcR/Chi/Ptx1/sim/gce/Bgb/Optix/pho/arm/MED4/bip2/kto/Taf12/abd-A/Ubx/CG12768/exd/jigr1/MED26/skd/E2f2	51
Female.marker.genes	GO:0051427	hormone receptor binding	6/2020	10/12127	0.00241941	0.0108033	0.00737495	tai/Hr38/alien/DOR/arm/Pa1	6		Male.marker.genes	GO:0038127	ERBB signaling pathway	33/2449	63/12275	9.88568e-09	8.3912e-08	4.15015e-08	rho-5/ed/Fas2/S/Gug/Src64B/Socs36E/Mkp3/rho/spen/Ptp10D/kek1/cic/sty/vn/pum/Src42A/gro/tay/dlg1/csw/Ptpmeg/hppy/RasGAP1/scrib/Sulf1/aop/Graf/pnt/ave/Socs44A/spi/Ptp4E	33		Female.marker.genes	GO:0005768	endosome	59/2074	212/11938	9.14408e-05	0.00042197	0.000240192	CG32225/nwk/Vha55/Rab3/fz2/hbs/CG34384/wit/S/Fas3/CG6051/nuf/Evi5/rho/CG5110/CG4080/Klp98A/Rab18/neur/comm/Dl/fz/ed/Lamp1/Rab14/CG32758/Ndfip/Vha100-1/Sap-r/aph-1/CG13784/Vps24/RabX4/Rab11/Vps29/Rab7/Tl/LTV1/Ykt6/arr/path/Rab35/Rab26/godzilla/CG14977/g/pen-2/Khc-73/Chmp1/Trs31/CG14812/Rab32/spin/Rab5/Scamp/fdl/Culd/CG30423/asrij	59
Female.marker.genes	GO:0004298	threonine-type endopeptidase activity	11/2020	27/12127	0.0025684	0.0113115	0.00772187	Prosalpha5/Prosbeta2/Prosalpha3/Prosbeta4/Prosbeta3/Prosbeta5/Prosbeta1/Prosbeta6/Prosalpha2/Prosalpha7/Prosalpha6	11		Male.marker.genes	GO:0042063	gliogenesis	40/2449	84/12275	1.00915e-08	8.491e-08	4.19951e-08	kune/pasi2/pasi1/nrv2/pck/Cont/CSN5/Sdc/pros/Nrg/fra/sli/poe/Galphao/Nrx-IV/ths/kuz/eag/numb/spen/sty/jing/Rac1/NetB/gish/yki/nej/bnl/salm/ey/cora/Dl/wts/pyr/bnb/not/cno/Rho1/CG13287/kibra	40		Female.marker.genes	GO:0044295	axonal growth cone	9/2074	14/11938	0.000122414	0.000559764	0.000318627	NetB/Trim9/Con/fra/erm/CLIP-190/robo1/Rtnl1/shot	9
Female.marker.genes	GO:0070003	threonine-type peptidase activity	11/2020	27/12127	0.0025684	0.0113115	0.00772187	Prosalpha5/Prosbeta2/Prosalpha3/Prosbeta4/Prosbeta3/Prosbeta5/Prosbeta1/Prosbeta6/Prosalpha2/Prosalpha7/Prosalpha6	11		Male.marker.genes	GO:0048489	synaptic vesicle transport	40/2449	84/12275	1.00915e-08	8.491e-08	4.19951e-08	gammaSnap1/sesB/cpx/Rab3/nSyb/Chc/Tomosyn/GABA-B-R2/unc-13-4A/Nrx-IV/Syx1A/Syx6/Fife/Rim/Sytbeta/NFAT/Syt4/Cadps/Snap25/Rop/Syn/unc-13/Syx13/CASK/Blos1/unc-104/BicD/Syt1/Syt7/shi/Snap24/Aplip1/Syngr/Drp1/Rph/alphaSnap/Liprin-alpha/X11L/gammaSnap2/Syx7	40		Female.marker.genes	GO:0045171	intercellular bridge	13/2074	26/11938	0.000138261	0.000626534	0.000356633	sosie/chb/pnut/14-3-3zeta/Src64B/14-3-3epsilon/sqh/cindr/Lpin/Btk29A/jar/sgg/hts	13
Female.marker.genes	GO:0008017	microtubule binding	30/2020	109/12127	0.00285218	0.0124758	0.0085167	CG14535/Jupiter/awd/pigs/Moe/CG17816/unc-104/chb/pnut/Klp98A/shi/Lis-1/CLIP-190/futsch/BuGZ/Kank/bif/alpha-Spec/jar/shot/capu/stau/spir/tacc/pod1/corn/Kif3C/tau/beta-Spec/Cep135	30		Male.marker.genes	GO:0097480	establishment of synaptic vesicle localization	40/2449	84/12275	1.00915e-08	8.491e-08	4.19951e-08	gammaSnap1/sesB/cpx/Rab3/nSyb/Chc/Tomosyn/GABA-B-R2/unc-13-4A/Nrx-IV/Syx1A/Syx6/Fife/Rim/Sytbeta/NFAT/Syt4/Cadps/Snap25/Rop/Syn/unc-13/Syx13/CASK/Blos1/unc-104/BicD/Syt1/Syt7/shi/Snap24/Aplip1/Syngr/Drp1/Rph/alphaSnap/Liprin-alpha/X11L/gammaSnap2/Syx7	40		Female.marker.genes	GO:0045179	apical cortex	21/2074	54/11938	0.000144808	0.000650345	0.000370187	app/sdt/Spn/sano/brat/nuf/CG42684/dlg1/Dl/aPKC/wts/pros/Mbs/sqh/cindr/baz/Abl/kibra/stau/Rho1/Arpc2	21
Female.marker.genes	GO:0001085	RNA polymerase II transcription factor binding	15/2020	43/12127	0.00287383	0.0124856	0.00852339	bi/Trf2/sd/shn/Mad/tna/Gug/emc/lilli/bin3/e(y)2/Chi/Ptx1/tup/ush	15		Male.marker.genes	GO:0048520	positive regulation of behavior	21/2449	31/12275	1.01807e-08	8.54112e-08	4.2243e-08	rho-5/Nca/Galphas/Ih/qvr/Hk/EcR/Sirt1/wake/Pka-R1/Dh31/mnb/Oamb/5-HT2A/Shab/sNPF-R/Acer/Sh/foxo/mld/Ets96B	21		Female.marker.genes	GO:1905368	peptidase complex	30/2074	90/11938	0.00017547	0.000781074	0.0004446	Prosalpha5/Spase12/Prosbeta2/Prosalpha3/Prosbeta4/Prosbeta3/Prosbeta5/Prosbeta1/Spase25/Rpt3/Rpt1/Sem1/Rpn12/Rpn9/Prosbeta6/Taf10b/Prosalpha2/Rpn10/e(y)2/Rpt6/Prosalpha7/Prosalpha6/Rpn3/Taf12/Sgf11/TER94/Rad23/Sgf29/not/Rpn6	30
Female.marker.genes	GO:0005326	neurotransmitter transporter activity	14/2020	39/12127	0.00290133	0.0125205	0.0085472	GC1/CG10804/VGAT/VGlut/CG43066/prt/cpx/VAChT/Eaat2/Vmat/DAT/CG7708/Tk/SLC22A	14		Male.marker.genes	GO:0048167	regulation of synaptic plasticity	23/2449	36/12275	1.101e-08	9.2101e-08	4.55516e-08	Cbp53E/Sap47/nemy/Rab3/Sod1/Fas2/Dys/Prosap/Src64B/kek6/Fife/Syt12/Rim/Syt4/brp/Csk/Snap25/Src42A/Sod2/Akt1/spz5/shi/dj-1beta	23		Female.marker.genes	GO:0099572	postsynaptic specialization	13/2074	27/11938	0.000224436	0.000990275	0.000563681	Spn/Neto/Prosap/Fas2/dlg1/scrib/shi/Magi/nAChRalpha7/eIF4E1/pum/Grip/hts	13
Female.marker.genes	GO:0005088	Ras guanyl-nucleotide exchange factor activity	19/2020	60/12127	0.00304188	0.0130395	0.0089015	CG7369/CG43658/CG42674/sif/mbc/trio/Rgl/Zir/Exn/spg/spri/GEFmeso/Rab3-GEF/CG34393/Cdep/Bet5/Trs31/pns/CG9098	19		Male.marker.genes	GO:0070848	response to growth factor	43/2449	94/12275	1.30302e-08	1.08685e-07	5.3754e-08	put/Mmp2/Snoo/fra/Lis-1/cmpy/smt3/lwr/ths/dlp/wit/eIF4A/Src64B/Dad/tld/kek5/dally/ttv/sty/Mad/Smox/sfl/shn/cv-2/trio/gro/Smurf/bnl/mav/sxc/csw/RasGAP1/lqf/pyr/cbt/aop/trol/sog/fuss/Lpin/pnt/tkv/p38b	43		Female.marker.genes	GO:0016324	apical plasma membrane	25/2074	71/11938	0.000227682	0.000995862	0.000566861	sdt/Pde6/hbs/Moe/sosie/kek1/dally/a/aPKC/btsz/mgl/Ca-alpha1D/crb/sqh/cac/rst/baz/ZnT63C/Rab35/Stat92E/arm/Syt4/kibra/stau/Rho1	25
Female.marker.genes	GO:0051015	actin filament binding	18/2020	56/12127	0.00322922	0.0136926	0.00934731	Msp300/Spn/Akap200/Svil/Unc-115a/Tm1/sals/didum/bif/sn/jar/Arpc1/Arpc3A/Arpc5/pod1/Arp2/Arpc2/hts	18		Male.marker.genes	GO:0007188	adenylate cyclase-modulating G protein-coupled receptor signaling pathway	30/2449	55/12275	1.34512e-08	1.11874e-07	5.5331e-08	TyrR/DopEcR/GABA-B-R2/mAChR-A/GABA-B-R1/Galphao/5-HT1A/Oct-TyrR/Galphas/CG12290/Octbeta2R/Dop2R/Octbeta3R/Galphaq/Octbeta1R/5-HT7/Ac78C/Dh31/Dop1R1/5-HT1B/Ac3/Cirl/Ac13E/rut/Dop1R2/Ac76E/CG43373/rk/Lgr4/Pdfr	30		Female.marker.genes	GO:0005751	mitochondrial respiratory chain complex IV	9/2074	15/11938	0.000258806	0.00112224	0.000638796	cype/COX5A/COX5B/COX7C/ND-MLRQ/COX4/COX6B/levy/COX7A	9
Female.marker.genes	GO:0003713	transcription coactivator activity	21/2020	69/12127	0.00323682	0.0136926	0.00934731	Ssb-c31a/mam/tai/mnb/nej/shn/Eip75B/Mad/tna/TfIIA-S/DOR/e(y)2/EcR/Lpin/Bgb/CtBP/arm/MED4/kto/Sgf11/exd	21		Male.marker.genes	GO:0007265	Ras protein signal transduction	62/2449	158/12275	1.56148e-08	1.29495e-07	6.40461e-08	14-3-3zeta/Rab3/14-3-3epsilon/CG43658/RabX4/Rab11/Efa6/PlexA/Cdep/rin/GEFmeso/smt3/Pp1-87B/CRMP/Exn/Rala/mbc/CG42684/siz/sty/RhoGDI/Ziz/Epac/Rac1/C3G/CG42674/spri/RhoGAP100F/trio/RhoGAP19D/RhoGAP71E/Ric/sif/Rab6/RhoBTB/RhoGEF3/PsGEF/Zir/PlexB/Rab26/Sur-8/Rab14/RhoGAPp190/cv-c/Rab27/Rgl/Rab35/Rab21/Cka/Rab4/Mob4/Rho1/Graf/pns/Rab40/CG34393/ave/CG9098/Rlip/Ras64B/Rab1/Rab7	62		Female.marker.genes	GO:0098595	perivitelline space	10/2074	18/11938	0.000276012	0.00118662	0.000675442	dlp/fra/CG12163/dally/CG32066/kuz/CtsB1/sdk/Sdc/Meltrin	10
Female.marker.genes	GO:0070851	growth factor receptor binding	10/2020	24/12127	0.00329238	0.0138366	0.00944563	vn/ths/kek1/dlg1/PVRAP/ed/Pvf3/bnl/pyr/drk	10		Male.marker.genes	GO:0031334	positive regulation of protein complex assembly	32/2449	61/12275	1.57663e-08	1.30377e-07	6.44823e-08	nwk/Ssb-c31a/chinmo/Rpt3/Arpc5/svr/Jupiter/ringer/Arpc4/Arpc3A/Arpc1/Taf11/IRSp53/CG11486/spir/DAAM/gish/Vrp1/chb/RhoBTB/Rpt6/shi/Cip4/dco/cal1/sals/Arpc2/Arp3/capu/Rpt4/Rack1/Lam	32		Female.marker.genes	GO:0009986	cell surface	25/2074	72/11938	0.000292005	0.00124473	0.000708522	Wnt4/dlp/Nlg3/plx/CadN2/eys/Mmp2/Nlg2/Con/wry/qvr/Gfrl/dally/Toll-7/Dl/ed/kirre/Cals/Dtg/Nlg4/Ret/Tl/Sdc/CG5027/Hsp83	25
Female.marker.genes	GO:0072341	modified amino acid binding	8/2020	17/12127	0.00343162	0.0143281	0.00978116	Sytbeta/ND-ACP/Syt1/Syt12/FASN1/Syt7/Syt4/drpr	8		Male.marker.genes	GO:0009755	hormone-mediated signaling pathway	22/2449	34/12275	1.63437e-08	1.34766e-07	6.66528e-08	DENR/Nurf-38/Hr4/Eip75B/Oatp74D/AdipoR/ftz-f1/DOR/EcR/G9a/CG15537/Dh44-R2/E(bx)/Dh44-R1/rk/Gpb5/Lgr4/Hr39/Hydr2/gce/Dh44/Pa1	22		Female.marker.genes	GO:0031902	late endosome membrane	13/2074	28/11938	0.000352711	0.00149087	0.000848628	CG32225/S/rho/CG5110/CG4080/comm/Lamp1/Vps29/Rab7/LTV1/CG14977/CG14812/spin	13
Female.marker.genes	GO:0015631	tubulin binding	35/2020	134/12127	0.00349349	0.0144924	0.00989329	stai/CG14535/Jupiter/awd/pigs/Moe/CG17816/unc-104/chb/pnut/Klp98A/shi/ringer/Lis-1/CLIP-190/futsch/CG3226/BuGZ/Kank/bif/alpha-Spec/jar/shot/capu/stau/spir/tacc/pod1/corn/TBCC/Kif3C/tau/beta-Spec/Cep135/CG1890	35		Male.marker.genes	GO:0016079	synaptic vesicle exocytosis	33/2449	64/12275	1.65201e-08	1.35832e-07	6.71803e-08	gammaSnap1/cpx/Rab3/nSyb/Chc/Tomosyn/GABA-B-R2/unc-13-4A/Nrx-IV/Syx1A/Syx6/Fife/Rim/Sytbeta/NFAT/Syt4/Cadps/Snap25/Rop/Syn/unc-13/Syx13/CASK/BicD/Syt1/Syt7/Snap24/Syngr/Rph/alphaSnap/X11L/gammaSnap2/Syx7	33		Female.marker.genes	GO:0000314	organellar small ribosomal subunit	14/2074	32/11938	0.000449463	0.00185017	0.00105315	tko/mRpS10/mRpS7/mRpS22/mRpL12/mRpS24/mRpS6/mRpS2/mRpS33/mRpS21/bonsai/mRpS30/mRpS35/mRpS14	14
Female.marker.genes	GO:0022804	active transmembrane transporter activity	60/2020	258/12127	0.00359424	0.0148147	0.0101134	sesB/Dic1/nrv3/GC1/CG10804/blw/VGAT/sun/Atpalpha/kcc/Tim8/ATPsynB/Vha26/ATPsyndelta/Vha55/Vha44/ATPsynE/SPoCk/Calx/ATPsyngamma/ATPsynbeta/nrv2/VhaAC45/w/CG43066/Oatp74D/prt/Vha16-1/rdgB/PMCA/Ndae1/Vha36-1/Tom20/Ent3/Mpcp2/Sec61beta/Eaat2/Vha100-1/VhaM9.7-b/CG8860/CG31030/Nckx30C/Atet/ATPsynC/Vha13/ATPsynD/Vha68-1/ATPsynG/ATPsynO/CG1907/Vmat/DAT/Tom7/CG7708/MCU/CG1090/CG32091/CG10960/Nhe2/Sec61gam…	60		Male.marker.genes	GO:1905879	regulation of oogenesis	35/2449	70/12275	1.72285e-08	1.41254e-07	6.98618e-08	Rab11/tsu/zip/enc/Bruce/mago/Diap1/Syx1A/klar/Pka-C1/kuz/puc/tai/mbc/kay/Hrb27C/vn/Rac1/spri/Rop/Atg1/kis/hep/dlg1/Syt1/Ptpmeg/cnc/bic/aop/shg/Pvr/bsk/spi/TER94/E2f1	35		Female.marker.genes	GO:0005763	mitochondrial small ribosomal subunit	14/2074	32/11938	0.000449463	0.00185017	0.00105315	tko/mRpS10/mRpS7/mRpS22/mRpL12/mRpS24/mRpS6/mRpS2/mRpS33/mRpS21/bonsai/mRpS30/mRpS35/mRpS14	14
Female.marker.genes	GO:0098960	postsynaptic neurotransmitter receptor activity	9/2020	21/12127	0.00419276	0.0169556	0.0115748	nAChRalpha6/nAChRalpha5/nAChRalpha1/nAChRbeta1/nAChRalpha3/nAChRalpha7/nAChRalpha2/nAChRbeta2/nAChRalpha4	9		Male.marker.genes	GO:0032273	positive regulation of protein polymerization	25/2449	42/12275	2.03413e-08	1.66303e-07	8.2251e-08	nwk/chinmo/Arpc5/svr/Jupiter/ringer/Arpc4/Arpc3A/Arpc1/IRSp53/spir/DAAM/gish/Vrp1/chb/RhoBTB/shi/Cip4/dco/sals/Arpc2/Arp3/capu/Rack1/Lam	25		Female.marker.genes	GO:0014069	postsynaptic density	8/2074	13/11938	0.000459783	0.00185017	0.00105315	Spn/Prosap/dlg1/scrib/shi/nAChRalpha7/Grip/hts	8
Female.marker.genes	GO:0099529	neurotransmitter receptor activity involved in regulation of postsynaptic membrane potential	9/2020	21/12127	0.00419276	0.0169556	0.0115748	nAChRalpha6/nAChRalpha5/nAChRalpha1/nAChRbeta1/nAChRalpha3/nAChRalpha7/nAChRalpha2/nAChRbeta2/nAChRalpha4	9		Male.marker.genes	GO:0009152	purine ribonucleotide biosynthetic process	46/2449	105/12275	2.1799e-08	1.77717e-07	8.78961e-08	Tpi/Pgk/Cyt-c1/ATPsynbeta/PyK/sesB/Pglym78/Eno/Gapdh2/Gapdh1/blw/ATPsynCF6/sun/COX5B/ATPsynB/Dg/Gycalpha99B/awd/Scox/Hex-A/Ac78C/Gycbeta100B/ATPsynG/ATPsynC/ATPsyndelta/ATPsyngamma/ATPsynD/ATPsynO/Ac3/CG17691/CG31183/ATPsynE/muc/Gyc89Db/CG34357/Acsl/AMPdeam/Ppcs/rut/Ac76E/CG43373/Adk2/AdSS/CG10738/Gyc88E/Dpck	46		Female.marker.genes	GO:0032279	asymmetric synapse	8/2074	13/11938	0.000459783	0.00185017	0.00105315	Spn/Prosap/dlg1/scrib/shi/nAChRalpha7/Grip/hts	8
Female.marker.genes	GO:1904315	transmitter-gated ion channel activity involved in regulation of postsynaptic membrane potential	9/2020	21/12127	0.00419276	0.0169556	0.0115748	nAChRalpha6/nAChRalpha5/nAChRalpha1/nAChRbeta1/nAChRalpha3/nAChRalpha7/nAChRalpha2/nAChRbeta2/nAChRalpha4	9		Male.marker.genes	GO:0015833	peptide transport	147/2449	486/12275	2.33135e-08	1.89529e-07	9.37377e-08	CG8860/gammaSnap1/CG34132/Tom7/Torsin/CG8004/UQCR-C2/UQCR-C1/CG6878/Gdi/Rab3/tsr/Tom20/app/CG9650/plx/Arl4/Hel25E/RabX4/Rab11/Vps24/Fs(2)Ket/Sem1/CaMKII/wls/CG5021/bai/eca/Chc/p24-1/Mtor/CHOp24/CG13887/rho-5/Lis-1/Glut1/Tsp86D/GABA-B-R2/Sar1/Sec61alpha/Dhc64C/Spase22-23/cmpy/Sec61beta/sdt/boca/Spase25/Srp14/CG5885/Snx3/Arpc1/ksh/Syx1A/S/crb/puc/AdipoR/Syx6/Myo10A/Rim/rho/Evi5/CG33298/Sik3/Tnpo/pi…	147		Female.marker.genes	GO:0034704	calcium channel complex	8/2074	13/11938	0.000459783	0.00185017	0.00105315	Ca-alpha1T/Ca-alpha1D/Ca-beta/CG4587/RyR/cac/MCU/EMRE	8
Female.marker.genes	GO:0008519	ammonium transmembrane transporter activity	6/2020	11/12127	0.00457539	0.0182731	0.0124743	prt/VAChT/Vmat/DAT/CG7708/SLC22A	6		Male.marker.genes	GO:0002164	larval development	63/2449	163/12275	2.36835e-08	1.91996e-07	9.49581e-08	Torsin/Msp300/ap/Nna1/trn/caps/CSN5/crp/Sar1/sns/Oatp74D/Tl/fz2/lwr/ths/SrpRbeta/Smn/asrij/SoxN/klar/pan/Gug/Eip63E/lola/Dad/D/rho/mbc/lolal/chn/sty/EcR/Tnpo/rhea/RpS8/Apc/kirre/Moe/skd/lgs/chic/fz/Top1/Alh/dlg1/Stat92E/wech/nsl1/arm/btsz/scrib/Sin3A/pyr/neur/Pvr/CrebA/lid/pnt/akirin/kn/Axn/sds22/E2f1	63		Female.marker.genes	GO:0098984	neuron to neuron synapse	8/2074	13/11938	0.000459783	0.00185017	0.00105315	Spn/Prosap/dlg1/scrib/shi/nAChRalpha7/Grip/hts	8
Female.marker.genes	GO:0050145	nucleoside monophosphate kinase activity	6/2020	11/12127	0.00457539	0.0182731	0.0124743	Dak1/sdt/Adk1/dlg1/CG11811/Adk2	6		Male.marker.genes	GO:0042886	amide transport	148/2449	491/12275	2.66863e-08	2.15257e-07	1.06462e-07	CG8860/gammaSnap1/CG34132/Tom7/Torsin/CG8004/UQCR-C2/UQCR-C1/CG6878/Gdi/Rab3/tsr/Tom20/app/CG9650/plx/Arl4/Hel25E/RabX4/Rab11/Vps24/Fs(2)Ket/Sem1/CaMKII/wls/CG5021/bai/eca/Chc/p24-1/Mtor/CHOp24/CG13887/rho-5/Lis-1/Glut1/Tsp86D/GABA-B-R2/Sar1/Sec61alpha/Dhc64C/Spase22-23/cmpy/Sec61beta/sdt/boca/Spase25/Srp14/CG5885/Snx3/Arpc1/ksh/Syx1A/S/crb/puc/AdipoR/Syx6/Myo10A/Rim/rho/Evi5/CG33298/Sik3/Tnpo/pi…	148		Female.marker.genes	GO:0000502	proteasome complex	22/2074	62/11938	0.000469401	0.00185912	0.00105824	Prosalpha5/Prosbeta2/Prosalpha3/Prosbeta4/Prosbeta3/Prosbeta5/Prosbeta1/Rpt3/Rpt1/Sem1/Rpn12/Rpn9/Prosbeta6/Prosalpha2/Rpn10/Rpt6/Prosalpha7/Prosalpha6/Rpn3/TER94/Rad23/Rpn6	22
Female.marker.genes	GO:0022824	transmitter-gated ion channel activity	15/2020	45/12127	0.00471118	0.0186993	0.0127652	Nmdar2/nAChRalpha6/nAChRalpha5/GluRIB/GluRIA/Rdl/nAChRalpha1/nAChRbeta1/nAChRalpha3/nAChRalpha7/nAChRalpha2/nAChRbeta2/Nmdar1/nAChRalpha4/Grd	15		Male.marker.genes	GO:0046928	regulation of neurotransmitter secretion	18/2449	25/12275	2.67932e-08	2.15257e-07	1.06462e-07	cpx/nemy/Rab3/sky/Frq2/GABA-B-R2/Ih/Dys/cac/Fife/Exn/Syt12/NFAT/Syt4/CASK/BicD/Frq1/twit	18		Female.marker.genes	GO:1905369	endopeptidase complex	22/2074	62/11938	0.000469401	0.00185912	0.00105824	Prosalpha5/Prosbeta2/Prosalpha3/Prosbeta4/Prosbeta3/Prosbeta5/Prosbeta1/Rpt3/Rpt1/Sem1/Rpn12/Rpn9/Prosbeta6/Prosalpha2/Rpn10/Rpt6/Prosalpha7/Prosalpha6/Rpn3/TER94/Rad23/Rpn6	22
Female.marker.genes	GO:0030674	protein binding, bridging	13/2020	37/12127	0.00500726	0.0197492	0.0134819	CG17270/phyl/csw/AP-2sigma/CG3104/BicD/AP-1-2beta/wech/raptor/sn/pod1/drk/Arp1	13		Male.marker.genes	GO:0051588	regulation of neurotransmitter transport	18/2449	25/12275	2.67932e-08	2.15257e-07	1.06462e-07	cpx/nemy/Rab3/sky/Frq2/GABA-B-R2/Ih/Dys/cac/Fife/Exn/Syt12/NFAT/Syt4/CASK/BicD/Frq1/twit	18		Female.marker.genes	GO:0015629	actin cytoskeleton	36/2074	121/11938	0.000530166	0.00208339	0.0011859	Msp300/tsr/Act42A/Spn/pigs/Moe/Myo81F/Lis-1/Act5C/DCTN3-p24/IRSp53/Myo10A/Cam/Arpc4/sqh/Unc-115a/Tm1/capt/sals/didum/sn/jar/Arpc1/capu/Zyx/Mlc-c/Arpc3A/Arpc5/pod1/Arp2/Arpc2/beta-Spec/hts/ninaC/Arp1/GMF	36
Female.marker.genes	GO:0005184	neuropeptide hormone activity	12/2020	33/12127	0.00503711	0.0197492	0.0134819	Nplp1/sNPF/Dh31/AstC/Proc/Ms/AstA/CCHa2/Tk/CCHa1/NPF/Mip	12		Male.marker.genes	GO:0007308	oocyte construction	58/2449	146/12275	2.68511e-08	2.15257e-07	1.06462e-07	14-3-3zeta/Syp/14-3-3epsilon/CkIIalpha/Rab11/tsu/CSN5/rump/Hsp83/bai/aPKC/Chc/enc/Lis-1/Dg/Dhc64C/mago/SmD3/lost/Syx1A/klar/Pka-C1/tld/flw/orb/tud/cic/Hrb27C/spir/jvl/heph/poly/Pka-R1/sqd/Moe/chb/Tm1/Rop/glo/chic/Rab6/CkIIbeta/dlg1/BicD/Syt1/cnc/psq/scrib/bic/cni/capt/sog/shg/baz/Pat1/capu/TER94/alpha-Spec	58		Female.marker.genes	GO:0005918	septate junction	14/2074	33/11938	0.000656945	0.00256158	0.00145809	Atpalpha/sdt/nrv2/Fas3/kune/Nrg/cora/dlg1/scrib/Lac/pck/crim/CG45049/vari	14
[truncated: 3,466 more rows]

## Sheet: 2.MaleDataSetGO
Table name	Analysis	# of Genes	List Description
MaleDataSetGO	Flymine	3582	GO enrichment for protein domain and pathway for the male data set marker gene list
Protein Domain Enrichment				Pathway Enrichment
GO Term	p-value	Genes	InterPro identifier	Pathway	p-value	Genes	UniProt identifier
[truncated: 140 more rows]

## Sheet: 3.FemaleDataSetGO
Table name	Analysis	# of Genes	List Description
[truncated: 248 more rows]

## Sheet: 4.FullDataSetGO
Table name	Analysis	# of Genes	List Description
[truncated: 180 more rows]

## Sheet: 5.dsxSubcluster1
Table name	Analysis	# of Genes	List Description
[truncated: 18 more rows]

## Sheet: 6.dsxSubcluster2
Table name	Analysis	# of Genes	List Description
[truncated: 10 more rows]

[truncated: 11 more sheets: 7.dsxSubcluster4, 8.MBSubcluster4, 9.DopamineCluster58, 10.DopamineCluster74, 11.DopamineCluster89, 12.MaleDopamine56, 13.MaleDopamine67 , 9.MalevsFemaleMarkerGenes, 10.Uniquetomalesinclusters, 11.Uniquetofemalesinclusters, 12.DiffExpressedinBothSexes]
