# Supplementary material for: Single-cell transcriptome profiles of Drosophila fruitless-expressing neurons from both sexes
Source: eLife. 2023 Feb 1;12:e78511. doi: 10.7554/eLife.78511 (PMC9891730; doi:10.7554/eLife.78511)
Supplement: Source data 5. — Excel data table containing cell number contributions by each sex per cluster. A scaling factor to normalize the number of male and female cells was applied to determine the sex bias in cell number. The table includes assessments of cluster data with random female cells removed, and a full Seurat re-analyses of data with downsampled female cell numbers. The table includes the cluster comparisons of downsampled analyses using clustifyr matching. [file elife-78511-data5.xlsx]

## Sheet: README
Source data 5: Assigning sex-bias to cell clusters in full and downsampled data sets
Sheet number	Sheet	Description
1	Full data set sex bias	Determination of sex-specific and sex-biased clusters in full data set using a scaling factor to normalize male and female cells
2	Female cell removal analyses	Determination of sex-specific and sex-biased clusters in three independent data sets where female cells were reduced to 7,988, to normalize the male and female cell numbers, by random cell removal from the full data analysis UMAP space
3	Full data analysis vs. cell removal	Comparison of sex-specific and sex-biased clusters between the full and data sets after random cell removal (sheet 2)
4	Re-analyzed female downsample	Determination of sex-specific and sex-biased clusters in downsampled data sets where female cells were reduced to 7,988, to normalize the number of cells between sexes, and underwent full re-analysis and clustering (see methods)
5	Clustifyr match for down sample	clustifyr spearman correlations for matching downsampled data set clusters to those in full data analysis
6	Full data set vs. matched	Comparison of sex-specific and sex-biased clusters between the full and downsampled clusters that were matched with clustifyr
	Highlighted cells on sheets 3 and 6 indicate differences in sex-specific and sex-biased assignment after random cell removal or downsampled female cell re-analysis

## Sheet: 1.Full data analysis sex-bias
Cluster	Male	Female	Female cells normalized	male/female	female/male	sex_bias		Male-biased if >2, strong male-bias if >4
0	734	430	196.347	3.73828	0.267503	Male-biased		Female-biased if >2, strong female-bias if >4
1	215	694	316.895	0.678458	1.47393	N		Female cell numbers were normalized by scaling factor of 2.19
2	17	803	366.667	0.0463636	21.5686	Female-biased, strong
3	293	513	234.247	1.25082	0.799476	N
4	124	659	300.913	0.412079	2.42672	Female-biased
5	32	737	336.53	0.0950882	10.5166	Female-biased, strong
6	298	448	204.566	1.45674	0.686464	N
7	210	484	221.005	0.950207	1.0524	N
8	220	474	216.438	1.01646	0.983811	N
9	213	424	193.607	1.10017	0.908954	N
10	67	554	252.968	0.264856	3.77564	Female-biased
11	116	466	212.785	0.54515	1.83436	N
12	576	3	1.36986	420.48	0.00237823	Male-biased, strong
13	148	381	173.973	0.850709	1.17549	N
14	524	4	1.82648	286.89	0.00348566	Male-biased, strong
15	40	438	200	0.2	5	Female-biased, strong
16	11	444	202.74	0.0542568	18.4309	Female-biased, strong
17	188	265	121.005	1.55366	0.643641	N
18	53	378	172.603	0.307063	3.25666	Female-biased
19	77	320	146.119	0.526969	1.89765	N
20	154	229	104.566	1.47275	0.679001	N
21	182	181	82.6484	2.2021	0.454112	Male-biased
22	106	240	109.589	0.96725	1.03386	N
23	214	108	49.3151	4.33944	0.230444	Male-biased, strong
24	201	119	54.3379	3.69908	0.270338	Male-biased
25	99	213	97.2603	1.01789	0.982427	N
26	73	237	108.219	0.674557	1.48245	N
27	79	217	99.0868	0.797281	1.25426	N
28	107	186	84.9315	1.25984	0.793752	N
29	123	157	71.6895	1.71573	0.582841	N
30	32	221	100.913	0.317104	3.15354	Female-biased
31	118	131	59.8174	1.97267	0.506927	N
32	114	133	60.7306	1.87714	0.532725	N
33	60	178	81.2785	0.738202	1.35464	N
34	72	161	73.516	0.979379	1.02106	N
35	32	200	91.3242	0.3504	2.85388	Female-biased
36	68	163	74.4292	0.91362	1.09455	N
37	4	220	100.457	0.0398182	25.1142	Female-biased, strong
38	118	99	45.2055	2.6103	0.383097	Male-biased
39	35	177	80.8219	0.433051	2.3092	Female-biased
40	67	143	65.2968	1.02608	0.974579	N
41	137	69	31.5068	4.34826	0.229977	Male-biased, strong
42	85	121	55.2511	1.53843	0.650013	N
43	85	113	51.5982	1.64735	0.607037	N
44	27	167	76.2557	0.354072	2.82429	Female-biased
45	55	122	55.7078	0.987295	1.01287	N
46	68	102	46.5753	1.46	0.684932	N
47	159	2	0.913242	174.105	0.00574366	Male-biased, strong
48	6	155	70.7763	0.0847742	11.796	Female-biased, strong
49	50	106	48.4018	1.03302	0.968037	N
50	98	57	26.0274	3.76526	0.265586	Male-biased
51	46	108	49.3151	0.932778	1.07207	N
52	29	121	55.2511	0.524876	1.90521	N
53	2	142	64.8402	0.0308451	32.4201	Female-biased, strong
54	56	86	39.2694	1.42605	0.701239	N
55	37	101	46.1187	0.802277	1.24645	N
56	15	123	56.1644	0.267073	3.74429	Female-biased
57	91	46	21.0046	4.33239	0.230819	Male-biased, strong
58	11	120	54.7945	0.20075	4.98132	Female-biased, strong
59	7	124	56.621	0.123629	8.08871	Female-biased, strong
60	22	102	46.5753	0.472353	2.11706	Female-biased
61	5	116	52.968	0.0943966	10.5936	Female-biased, strong
62	23	94	42.9224	0.535851	1.86619	N
63	20	90	41.0959	0.486667	2.05479	Female-biased
64	29	75	34.2466	0.8468	1.18092	N
65	8	95	43.379	0.184421	5.42237	Female-biased, strong
66	15	85	38.8128	0.386471	2.58752	Female-biased
67	8	90	41.0959	0.194667	5.13699	Female-biased, strong
68	95	0	0	#DIV/0!	0	Male-specific
69	2	91	41.5525	0.0481319	20.7763	Female-biased, strong
70	13	79	36.0731	0.36038	2.77485	Female-biased
71	20	72	32.8767	0.608333	1.64384	N
72	4	84	38.3562	0.104286	9.58904	Female-biased, strong
73	28	59	26.9406	1.03932	0.962166	N
74	2	85	38.8128	0.0515294	19.4064	Female-biased, strong
75	19	67	30.5936	0.621045	1.61019	N
76	23	61	27.8539	0.825738	1.21104	N
77	22	61	27.8539	0.789836	1.26609	N
78	15	68	31.0502	0.483088	2.07002	Female-biased
79	4	76	34.7032	0.115263	8.6758	Female-biased, strong
80	26	54	24.6575	1.05444	0.948367	N
81	52	27	12.3288	4.21778	0.237092	Male-biased, strong
82	8	69	31.5068	0.253913	3.93836	Female-biased
83	14	61	27.8539	0.502623	1.98956	N
84	24	48	21.9178	1.095	0.913242	N
85	20	51	23.2877	0.858824	1.16438	N
86	23	46	21.0046	1.095	0.913242	N
87	9	59	26.9406	0.334068	2.9934	Female-biased
88	2	66	30.137	0.0663636	15.0685	Female-biased, strong
89	1	60	27.3973	0.0365	27.3973	Female-biased, strong
90	3	55	25.1142	0.119455	8.37139	Female-biased, strong
91	23	31	14.1553	1.62484	0.615446	N
92	3	51	23.2877	0.128824	7.76256	Female-biased, strong
93	10	44	20.0913	0.497727	2.00913	Female-biased
94	7	46	21.0046	0.333261	3.00065	Female-biased
95	8	43	19.6347	0.407442	2.45434	Female-biased
96	1	50	22.8311	0.0438	22.8311	Female-biased, strong
97	0	49	22.3744	0	#DIV/0!	Female-specific
98	10	39	17.8082	0.561538	1.78082	N
99	0	48	21.9178	0	#DIV/0!	Female-specific
100	15	33	15.0685	0.995455	1.00457	N
101	2	44	20.0913	0.0995455	10.0457	Female-biased, strong
102	22	24	10.9589	2.0075	0.498132	Male-biased
103	10	33	15.0685	0.663636	1.50685	N
104	1	42	19.1781	0.0521429	19.1781	Female-biased, strong
105	3	39	17.8082	0.168462	5.93607	Female-biased, strong
106	2	40	18.2648	0.1095	9.13242	Female-biased, strong
107	0	30	13.6986	0	#DIV/0!	Female-specific
108	8	18	8.21918	0.973333	1.0274	N
109	15	10	4.56621	3.285	0.304414	Male-biased
110	4	19	8.6758	0.461053	2.16895	Female-biased
111	5	17	7.76256	0.644118	1.55251	N
112	2	17	7.76256	0.257647	3.88128	Female-biased
total number of cells	7988	17530

## Sheet: 2.Female cell removal analyses
		Cell removal 1								Cell removal 2								Cell removal 3
			Male-biased if >2, strong male-bias if >4	Female-biased if >2, strong female-bias if >4					Male-biased if >2, strong male-bias if >4	Female-biased if >2, strong female-bias if >4							Male-biased if >2, strong male-bias if >4	Female-biased if >2, strong female-bias if >4
Cluster	Male	Female	Male/Female	Female/Male	sex_bias			Cluster	Male	Female	male/female	female/male	sex_bias			Cluster	Male	Female	male/female	female/male	sex_bias
0	734	186	3.94624	0.253406	Male-biased			0	734	200	3.67	0.27248	Male-biased			0	734	186	3.94624	0.253406	Male-biased
1	215	321	0.669782	1.49302	N			1	215	287	0.749129	1.33488	N			1	215	321	0.669782	1.49302	N
2	17	363	0.046832	21.3529	Female-bias, strong			2	17	381	0.0446194	22.4118	Female-biased, strong			2	17	363	0.046832	21.3529	Female-biased, strong
3	293	209	1.40191	0.713311	N			3	293	246	1.19106	0.83959	N			3	293	209	1.40191	0.713311	N
4	124	301	0.41196	2.42742	Female-bias			4	124	318	0.389937	2.56452	Female-biased			4	124	301	0.41196	2.42742	Female-biased
5	32	326	0.0981595	10.1875	Female-bias, strong			5	32	347	0.092219	10.8438	Female-biased, strong			5	32	326	0.0981595	10.1875	Female-biased, strong
6	298	195	1.52821	0.654362	N			6	298	205	1.45366	0.687919	N			6	298	195	1.52821	0.654362	N
7	210	202	1.0396	0.961905	N			7	210	221	0.950226	1.05238	N			7	210	202	1.0396	0.961905	N
8	220	218	1.00917	0.990909	N			8	220	205	1.07317	0.931818	N			8	220	218	1.00917	0.990909	N
9	213	201	1.0597	0.943662	N			9	213	199	1.07035	0.934272	N			9	213	201	1.0597	0.943662	N
10	67	268	0.25	4	Female-bias, strong			10	67	263	0.254753	3.92537	Female-biased			10	67	268	0.25	4	Female-biased, strong
11	116	218	0.53211	1.87931	N			11	116	227	0.511013	1.9569	N			11	116	218	0.53211	1.87931	N
12	576	0	#DIV/0!	0	Male-specific			12	576	0	#DIV/0!	0	Male-specific			12	576	0	#DIV/0!	0	Male-specific
13	148	184	0.804348	1.24324	N			13	148	164	0.902439	1.10811	N			13	148	184	0.804348	1.24324	N
14	524	1	524	0.0019084	Male-biased, strong			14	524	1	524	0.0019084	Male-biased, strong			14	524	1	524	0.0019084	Male-biased, strong
15	40	193	0.207254	4.825	Female-bias, strong			15	40	205	0.195122	5.125	Female-biased, strong			15	40	193	0.207254	4.825	Female-biased, strong
16	11	211	0.0521327	19.1818	Female-bias, strong			16	11	205	0.0536585	18.6364	Female-biased, strong			16	11	211	0.0521327	19.1818	Female-biased, strong
17	188	116	1.62069	0.617021	N			17	188	125	1.504	0.664894	N			17	188	116	1.62069	0.617021	N
18	53	173	0.306358	3.26415	Female-bias			18	53	159	0.333333	3	Female-biased			18	53	173	0.306358	3.26415	Female-biased
19	77	132	0.583333	1.71429	N			19	77	157	0.490446	2.03896	Female-biased			19	77	132	0.583333	1.71429	N
20	154	113	1.36283	0.733766	N			20	154	103	1.49515	0.668831	N			20	154	113	1.36283	0.733766	N
21	182	81	2.24691	0.445055	Male-biased			21	182	81	2.24691	0.445055	Male-biased			21	182	81	2.24691	0.445055	Male-biased
22	106	104	1.01923	0.981132	N			22	106	112	0.946429	1.0566	N			22	106	104	1.01923	0.981132	N
23	214	44	4.86364	0.205607	Male-biased, strong			23	214	52	4.11538	0.242991	Male-biased, strong			23	214	44	4.86364	0.205607	Male-biased, strong
24	201	51	3.94118	0.253731	Male-biased			24	201	50	4.02	0.248756	Male-biased, strong			24	201	51	3.94118	0.253731	Male-biased
25	99	104	0.951923	1.05051	N			25	99	89	1.11236	0.89899	N			25	99	104	0.951923	1.05051	N
26	73	111	0.657658	1.52055	N			26	73	96	0.760417	1.31507	N			26	73	111	0.657658	1.52055	N
27	79	97	0.814433	1.22785	N			27	79	113	0.699115	1.43038	N			27	79	97	0.814433	1.22785	N
28	107	95	1.12632	0.88785	N			28	107	90	1.18889	0.841121	N			28	107	95	1.12632	0.88785	N
29	123	70	1.75714	0.569106	N			29	123	71	1.73239	0.577236	N			29	123	70	1.75714	0.569106	N
30	32	107	0.299065	3.34375	Female-bias			30	32	103	0.31068	3.21875	Female-biased			30	32	107	0.299065	3.34375	Female-biased
31	118	66	1.78788	0.559322	N			31	118	57	2.07018	0.483051	Male-biased			31	118	66	1.78788	0.559322	N
32	114	70	1.62857	0.614035	N			32	114	63	1.80952	0.552632	N			32	114	70	1.62857	0.614035	N
33	60	79	0.759494	1.31667	N			33	60	92	0.652174	1.53333	N			33	60	79	0.759494	1.31667	N
34	72	76	0.947368	1.05556	N			34	72	73	0.986301	1.01389	N			34	72	76	0.947368	1.05556	N
35	32	95	0.336842	2.96875	Female-bias			35	32	81	0.395062	2.53125	Female-biased			35	32	95	0.336842	2.96875	Female-biased
36	68	54	1.25926	0.794118	N			36	68	62	1.09677	0.911765	N			36	68	54	1.25926	0.794118	N
37	4	101	0.039604	25.25	Female-bias, strong			37	4	92	0.0434783	23	Female-biased, strong			37	4	101	0.039604	25.25	Female-biased, strong
38	118	45	2.62222	0.381356	Male-biased			38	118	44	2.68182	0.372881	Male-biased			38	118	45	2.62222	0.381356	Male-biased
39	35	76	0.460526	2.17143	Female-bias			39	35	82	0.426829	2.34286	Female-biased			39	35	76	0.460526	2.17143	Female-biased
40	67	63	1.06349	0.940299	N			40	67	56	1.19643	0.835821	N			40	67	63	1.06349	0.940299	N
41	137	27	5.07407	0.19708	Male-biased, strong			41	137	33	4.15152	0.240876	Male-biased, strong			41	137	27	5.07407	0.19708	Male-biased, strong
42	85	53	1.60377	0.623529	N			42	85	54	1.57407	0.635294	N			42	85	53	1.60377	0.623529	N
43	85	60	1.41667	0.705882	N			43	85	50	1.7	0.588235	N			43	85	60	1.41667	0.705882	N
44	27	82	0.329268	3.03704	Female-bias			44	27	70	0.385714	2.59259	Female-biased			44	27	82	0.329268	3.03704	Female-biased
45	55	58	0.948276	1.05455	N			45	55	54	1.01852	0.981818	N			45	55	58	0.948276	1.05455	N
46	68	50	1.36	0.735294	N			46	68	44	1.54545	0.647059	N			46	68	50	1.36	0.735294	N
47	159	0	#DIV/0!	0	Male-specific			47	159	0	#DIV/0!	0	Male-specific			47	159	0	#DIV/0!	0	Male-specific
48	6	73	0.0821918	12.1667	Female-bias, strong			48	6	64	0.09375	10.6667	Female-biased, strong			48	6	73	0.0821918	12.1667	Female-biased, strong
49	50	44	1.13636	0.88	N			49	50	60	0.833333	1.2	N			49	50	44	1.13636	0.88	N
50	98	32	3.0625	0.326531	Male-biased			50	98	20	4.9	0.204082	Male-biased, strong			50	98	32	3.0625	0.326531	Male-biased
51	46	37	1.24324	0.804348	N			51	46	53	0.867925	1.15217	N			51	46	37	1.24324	0.804348	N
52	29	58	0.5	2	Female-bias			52	29	64	0.453125	2.2069	Female-biased			52	29	58	0.5	2	Female-biased
53	2	60	0.0333333	30	Female-bias, strong			53	2	72	0.0277778	36	Female-biased, strong			53	2	60	0.0333333	30	Female-biased, strong
54	56	39	1.4359	0.696429	N			54	56	33	1.69697	0.589286	N			54	56	39	1.4359	0.696429	N
55	37	46	0.804348	1.24324	N			55	37	52	0.711538	1.40541	N			55	37	46	0.804348	1.24324	N
56	15	66	0.227273	4.4	Female-bias, strong			56	15	56	0.267857	3.73333	Female-biased			56	15	66	0.227273	4.4	Female-biased, strong
57	91	21	4.33333	0.230769	Male-biased, strong			57	91	15	6.06667	0.164835	Male-biased, strong			57	91	21	4.33333	0.230769	Male-biased, strong
58	11	54	0.203704	4.90909	Female-bias, strong			58	11	51	0.215686	4.63636	Female-biased, strong			58	11	54	0.203704	4.90909	Female-biased, strong
59	7	56	0.125	8	Female-bias, strong			59	7	56	0.125	8	Female-biased, strong			59	7	56	0.125	8	Female-biased, strong
60	22	40	0.55	1.81818	N			60	22	51	0.431373	2.31818	Female-biased			60	22	40	0.55	1.81818	N
61	5	55	0.0909091	11	Female-bias, strong			61	5	47	0.106383	9.4	Female-biased, strong			61	5	55	0.0909091	11	Female-biased, strong
62	23	42	0.547619	1.82609	N			62	23	50	0.46	2.17391	Female-biased			62	23	42	0.547619	1.82609	N
63	20	41	0.487805	2.05	Female-bias			63	20	40	0.5	2	Female-biased			63	20	41	0.487805	2.05	Female-biased
64	29	28	1.03571	0.965517	N			64	29	29	1	1	N			64	29	28	1.03571	0.965517	N
65	8	46	0.173913	5.75	Female-bias, strong			65	8	43	0.186047	5.375	Female-biased, strong			65	8	46	0.173913	5.75	Female-biased, strong
66	15	36	0.416667	2.4	Female-bias			66	15	42	0.357143	2.8	Female-biased			66	15	36	0.416667	2.4	Female-biased
67	8	39	0.205128	4.875	Female-bias, strong			67	8	38	0.210526	4.75	Female-biased, strong			67	8	39	0.205128	4.875	Female-biased, strong
68	95	0	#DIV/0!	0	Male-specific			68	95	0	#DIV/0!	0	Male-specific			68	95	0	#DIV/0!	0	Male-specific
69	2	47	0.0425532	23.5	Female-bias, strong			69	2	46	0.0434783	23	Female-biased, strong			69	2	47	0.0425532	23.5	Female-biased, strong
70	13	42	0.309524	3.23077	Female-bias			70	13	37	0.351351	2.84615	Female-biased			70	13	42	0.309524	3.23077	Female-biased
71	20	27	0.740741	1.35	N			71	20	25	0.8	1.25	N			71	20	27	0.740741	1.35	N
72	4	31	0.129032	7.75	Female-bias, strong			72	4	42	0.0952381	10.5	Female-biased, strong			72	4	31	0.129032	7.75	Female-biased, strong
73	28	27	1.03704	0.964286	N			73	28	27	1.03704	0.964286	N			73	28	27	1.03704	0.964286	N
74	2	35	0.0571429	17.5	Female-bias, strong			74	2	35	0.0571429	17.5	Female-biased, strong			74	2	35	0.0571429	17.5	Female-biased, strong
75	19	29	0.655172	1.52632	N			75	19	29	0.655172	1.52632	N			75	19	29	0.655172	1.52632	N
76	23	34	0.676471	1.47826	N			76	23	28	0.821429	1.21739	N			76	23	34	0.676471	1.47826	N
77	22	27	0.814815	1.22727	N			77	22	24	0.916667	1.09091	N			77	22	27	0.814815	1.22727	N
78	15	29	0.517241	1.93333	N			78	15	28	0.535714	1.86667	N			78	15	29	0.517241	1.93333	N
79	4	39	0.102564	9.75	Female-bias, strong			79	4	38	0.105263	9.5	Female-biased, strong			79	4	39	0.102564	9.75	Female-biased, strong
80	26	30	0.866667	1.15385	N			80	26	18	1.44444	0.692308	N			80	26	30	0.866667	1.15385	N
81	52	18	2.88889	0.346154	Male-biased			81	52	11	4.72727	0.211538	Male-biased, strong			81	52	18	2.88889	0.346154	Male-biased
82	8	33	0.242424	4.125	Female-bias, strong			82	8	30	0.266667	3.75	Female-biased			82	8	33	0.242424	4.125	Female-biased, strong
83	14	31	0.451613	2.21429	Female-bias			83	14	30	0.466667	2.14286	Female-biased			83	14	31	0.451613	2.21429	Female-biased
84	24	23	1.04348	0.958333	N			84	24	19	1.26316	0.791667	N			84	24	23	1.04348	0.958333	N
85	20	24	0.833333	1.2	N			85	20	18	1.11111	0.9	N			85	20	24	0.833333	1.2	N
86	23	23	1	1	N			86	23	21	1.09524	0.913043	N			86	23	23	1	1	N
87	9	29	0.310345	3.22222	Female-bias			87	9	23	0.391304	2.55556	Female-biased			87	9	29	0.310345	3.22222	Female-biased
88	2	33	0.0606061	16.5	Female-bias, strong			88	2	32	0.0625	16	Female-biased, strong			88	2	33	0.0606061	16.5	Female-biased, strong
89	1	32	0.03125	32	Female-bias, strong			89	1	24	0.0416667	24	Female-biased, strong			89	1	32	0.03125	32	Female-biased, strong
90	3	17	0.176471	5.66667	Female-bias, strong			90	3	25	0.12	8.33333	Female-biased, strong			90	3	17	0.176471	5.66667	Female-biased, strong
91	23	17	1.35294	0.73913	N			91	23	9	2.55556	0.391304	Male-biased			91	23	17	1.35294	0.73913	N
92	3	22	0.136364	7.33333	Female-bias, strong			92	3	25	0.12	8.33333	Female-biased, strong			92	3	22	0.136364	7.33333	Female-biased, strong
93	10	21	0.47619	2.1	Female-bias			93	10	28	0.357143	2.8	Female-biased			93	10	21	0.47619	2.1	Female-biased
94	7	29	0.241379	4.14286	Female-bias, strong			94	7	20	0.35	2.85714	Female-biased			94	7	29	0.241379	4.14286	Female-biased, strong
95	8	20	0.4	2.5	Female-bias			95	8	22	0.363636	2.75	Female-biased			95	8	20	0.4	2.5	Female-biased
96	1	20	0.05	20	Female-bias, strong			96	1	25	0.04	25	Female-biased, strong			96	1	20	0.05	20	Female-biased, strong
97	0	18	0	#DIV/0!	Female-specific			97	0	19	0	#DIV/0!	Female-specific			97	0	18	0	#DIV/0!	Female-specific
98	10	16	0.625	1.6	N			98	10	19	0.526316	1.9	N			98	10	16	0.625	1.6	N
99	0	23	0	#DIV/0!	Female-specific			99	0	21	0	#DIV/0!	Female-specific			99	0	23	0	#DIV/0!	Female-specific
100	15	12	1.25	0.8	N			100	15	14	1.07143	0.933333	N			100	15	12	1.25	0.8	N
101	2	20	0.1	10	Female-bias, strong			101	2	22	0.0909091	11	Female-biased, strong			101	2	20	0.1	10	Female-biased, strong
102	22	11	2	0.5	Male-biased			102	22	10	2.2	0.454545	Male-biased			102	22	11	2	0.5	Male-biased
103	10	16	0.625	1.6	N			103	10	17	0.588235	1.7	N			103	10	16	0.625	1.6	N
104	1	22	0.0454546	22	Female-bias, strong			104	1	16	0.0625	16	Female-biased, strong			104	1	22	0.0454545	22	Female-biased, strong
105	3	20	0.15	6.66667	Female-bias, strong			105	3	21	0.142857	7	Female-biased, strong			105	3	20	0.15	6.66667	Female-biased, strong
106	2	22	0.0909091	11	Female-bias, strong			106	2	22	0.0909091	11	Female-biased, strong			106	2	22	0.0909091	11	Female-biased, strong
107	0	12	0	#DIV/0!	Female-specific			107	0	13	0	#DIV/0!	Female-specific			107	0	12	0	#DIV/0!	Female-specific
108	8	11	0.727273	1.375	N			108	8	9	0.888889	1.125	N			108	8	11	0.727273	1.375	N
109	15	7	2.14286	0.466667	Male-biased			109	15	5	3	0.333333	Male-biased			109	15	7	2.14286	0.466667	Male-biased
110	4	10	0.4	2.5	Female-bias			110	4	8	0.5	2	Female-biased			110	4	10	0.4	2.5	Female-biased
111	5	8	0.625	1.6	N			111	5	8	0.625	1.6	N			111	5	8	0.625	1.6	N
112	2	8	0.25	4	Female-bias, strong			112	2	7	0.285714	3.5	Female-biased			112	2	8	0.25	4	Female-biased, strong

## Sheet: 3.Full data vs. cell removal
Full data set			Cell removal 1			Cell removal 2			Cell removal 3
														Male-biased if >2, strong male-bias if >4
Cluster	sex_bias		Cluster	sex_bias		Cluster	sex_bias		Cluster	sex_bias				Female-biased if >2, strong female-bias if >4
0	Male-biased		0	Male-biased		0	Male-biased		0	Male-biased
1	N		1	N		1	N		1	N
2	Female-biased, strong		2	Female-biased, strong		2	Female-biased, strong		2	Female-biased, strong
3	N		3	N		3	N		3	N
4	Female-biased		4	Female-biased		4	Female-biased		4	Female-biased
5	Female-biased, strong		5	Female-biased, strong		5	Female-biased, strong		5	Female-biased, strong
6	N		6	N		6	N		6	N
7	N		7	N		7	N		7	N
8	N		8	N		8	N		8	N
9	N		9	N		9	N		9	N
10	Female-biased		10	Female-biased, strong		10	Female-biased		10	Female-biased, strong
11	N		11	N		11	N		11	N
12	Male-biased, strong		12	Male-specific		12	Male-specific		12	Male-specific
13	N		13	N		13	N		13	N
14	Male-biased, strong		14	Male-biased, strong		14	Male-biased, strong		14	Male-biased, strong
15	Female-biased, strong		15	Female-biased, strong		15	Female-biased, strong		15	Female-biased, strong
16	Female-biased, strong		16	Female-biased, strong		16	Female-biased, strong		16	Female-biased, strong
17	N		17	N		17	N		17	N
18	Female-biased		18	Female-biased		18	Female-biased		18	Female-biased
19	N		19	N		19	Female-biased		19	N
20	N		20	N		20	N		20	N
21	Male-biased		21	Male-biased		21	Male-biased		21	Male-biased
22	N		22	N		22	N		22	N
23	Male-biased, strong		23	Male-biased, strong		23	Male-biased, strong		23	Male-biased, strong
24	Male-biased		24	Male-biased		24	Male-biased, strong		24	Male-biased
25	N		25	N		25	N		25	N
26	N		26	N		26	N		26	N
27	N		27	N		27	N		27	N
28	N		28	N		28	N		28	N
29	N		29	N		29	N		29	N
30	Female-biased		30	Female-biased		30	Female-biased		30	Female-biased
31	N		31	N		31	Male-biased		31	N
32	N		32	N		32	N		32	N
33	N		33	N		33	N		33	N
34	N		34	N		34	N		34	N
35	Female-biased		35	Female-biased		35	Female-biased		35	Female-biased
36	N		36	N		36	N		36	N
37	Female-biased, strong		37	Female-bias, strong		37	Female-biased, strong		37	Female-biased, strong
38	Male-biased		38	Male-biased		38	Male-biased		38	Male-biased
39	Female-biased		39	Female-biased		39	Female-biased		39	Female-biased
40	N		40	N		40	N		40	N
41	Male-biased, strong		41	Male-biased, strong		41	Male-biased, strong		41	Male-biased, strong
42	N		42	N		42	N		42	N
43	N		43	N		43	N		43	N
44	Female-biased		44	Female-bias		44	Female-biased		44	Female-biased
45	N		45	N		45	N		45	N
46	N		46	N		46	N		46	N
47	Male-biased, strong		47	Male-specific		47	Male-specific		47	Male-specific
48	Female-biased, strong		48	Female-biased, strong		48	Female-biased, strong		48	Female-biased, strong
49	N		49	N		49	N		49	N
50	Male-biased		50	Male-biased		50	Male-biased, strong		50	Male-biased
51	N		51	N		51	N		51	N
52	N		52	Female-biased		52	Female-biased		52	Female-biased
53	Female-biased, strong		53	Female-biased, strong		53	Female-biased, strong		53	Female-biased, strong
54	N		54	N		54	N		54	N
55	N		55	N		55	N		55	N
56	Female-biased		56	Female-biased, strong		56	Female-biased		56	Female-biased, strong
57	Male-biased, strong		57	Male-biased, strong		57	Male-biased, strong		57	Male-biased, strong
58	Female-biased, strong		58	Female-biased, strong		58	Female-biased, strong		58	Female-biased, strong
59	Female-biased, strong		59	Female-biased, strong		59	Female-biased, strong		59	Female-biased, strong
60	Female-biased		60	N		60	Female-biased		60	N
61	Female-biased, strong		61	Female-biased, strong		61	Female-biased, strong		61	Female-biased, strong
62	N		62	N		62	Female-biased		62	N
63	Female-biased		63	Female-biased		63	Female-biased		63	Female-biased
64	N		64	N		64	N		64	N
65	Female-biased, strong		65	Female-biased, strong		65	Female-biased, strong		65	Female-biased, strong
66	Female-biased		66	Female-biased		66	Female-biased		66	Female-biased
67	Female-biased, strong		67	Female-bias, strong		67	Female-biased, strong		67	Female-biased, strong
68	Male-specific		68	Male-specific		68	Male-specific		68	Male-specific
69	Female-biased, strong		69	Female-biased, strong		69	Female-biased, strong		69	Female-biased, strong
70	Female-biased		70	Female-biased		70	Female-biased		70	Female-biased
71	N		71	N		71	N		71	N
72	Female-biased, strong		72	Female-biased, strong		72	Female-biased, strong		72	Female-biased, strong
73	N		73	N		73	N		73	N
74	Female-biased, strong		74	Female-biased, strong		74	Female-biased, strong		74	Female-biased, strong
75	N		75	N		75	N		75	N
76	N		76	N		76	N		76	N
77	N		77	N		77	N		77	N
78	Female-biased		78	N		78	N		78	N
79	Female-biased, strong		79	Female-biased, strong		79	Female-biased, strong		79	Female-biased, strong
80	N		80	N		80	N		80	N
81	Male-biased, strong		81	Male-biased		81	Male-biased, strong		81	Male-biased
82	Female-biased		82	Female-bias, strong		82	Female-biased		82	Female-biased, strong
83	N		83	Female-biased		83	Female-biased		83	Female-biased
84	N		84	N		84	N		84	N
85	N		85	N		85	N		85	N
86	N		86	N		86	N		86	N
87	Female-biased		87	Female-biased		87	Female-biased		87	Female-biased
88	Female-biased, strong		88	Female-biased, strong		88	Female-biased, strong		88	Female-biased, strong
89	Female-biased, strong		89	Female-biased, strong		89	Female-biased, strong		89	Female-biased, strong
90	Female-biased, strong		90	Female-biased, strong		90	Female-biased, strong		90	Female-biased, strong
91	N		91	N		91	Male-biased		91	N
92	Female-biased, strong		92	Female-biased, strong		92	Female-biased, strong		92	Female-biased, strong
93	Female-biased		93	Female-biased		93	Female-biased		93	Female-biased
94	Female-biased		94	Female-biased, strong		94	Female-biased		94	Female-biased, strong
95	Female-biased		95	Female-biased		95	Female-biased		95	Female-biased
96	Female-biased, strong		96	Female-biased, strong		96	Female-biased, strong		96	Female-biased, strong
97	Female-specific		97	Female-specific		97	Female-specific		97	Female-specific
98	N		98	N		98	N		98	N
99	Female-specific		99	Female-specific		99	Female-specific		99	Female-specific
100	N		100	N		100	N		100	N
101	Female-biased, strong		101	Female-biased, strong		101	Female-biased, strong		101	Female-biased, strong
102	Male-biased		102	Male-biased		102	Male-biased		102	Male-biased
103	N		103	N		103	N		103	N
104	Female-biased, strong		104	Female-biased, strong		104	Female-biased, strong		104	Female-biased, strong
105	Female-biased, strong		105	Female-biased, strong		105	Female-biased, strong		105	Female-biased, strong
106	Female-biased, strong		106	Female-biased, strong		106	Female-biased, strong		106	Female-biased, strong
107	Female-specific		107	Female-specific		107	Female-specific		107	Female-specific
108	N		108	N		108	N		108	N
109	Male-biased		109	Male-biased		109	Male-biased		109	Male-biased
110	Female-biased		110	Female-biased		110	Female-biased		110	Female-biased
111	N		111	N		111	N		111	N
112	Female-biased		112	Female-biased, strong		112	Female-biased		112	Female-biased, strong

## Sheet: 4.Re-analyzed female downsample
		Down sampled 1							Down sampled 2							Down sampled 3
			Male-biased if >2, strong male-bias if >4	Female-biased if >2, strong female-bias if >4					Male-biased if >2, strong male-bias if >4	Female-biased if >2, strong female-bias if >4							Male-biased if >2, strong male-bias if >4	Female-biased if >2, strong female-bias if >4
Cluster	Male Cells	Female Cells	male/female	female/male	sex_bias		Cluster	Male cells	Female cells	male/female	female/male	sex_bias		Cluster	Male cells	Female cells	male/female	female/male	sex_bias
0	629	162	3.88272	0.257552	Male-biased		0	637	163	3.90798	0.255887	Male-biased		0	625	162	3.85802	0.2592	Male-biased
1	186	351	0.529915	1.8871	N		1	214	323	0.662539	1.50935	N		1	186	353	0.526912	1.89785	N
2	214	302	0.708609	1.41121	N		2	293	210	1.39524	0.716724	N		2	294	239	1.23013	0.812925	N
3	297	192	1.54688	0.646465	N		3	138	311	0.44373	2.25362	Female-biased		3	214	302	0.708609	1.41121	N
4	225	238	0.945378	1.05778	N		4	116	327	0.35474	2.81897	Female-biased		4	118	323	0.365325	2.73729	Female-biased
5	118	323	0.365325	2.73729	Female-biased		5	206	202	1.0198	0.980583	N		5	208	232	0.896552	1.11538	N
6	208	232	0.896552	1.11538	N		6	156	223	0.699552	1.42949	N		6	214	196	1.09184	0.915888	N
7	214	196	1.09184	0.915888	N		7	15	361	0.0415512	24.0667	Female biased, strong		7	154	187	0.823529	1.21429	N
8	154	189	0.814815	1.22727	N		8	315	1	315	0.0031746	Male-biased, strong		8	66	261	0.252874	3.95455	Female-biased
9	66	261	0.252874	3.95455	Female-biased		9	152	159	0.955975	1.04605	N		9	158	165	0.957576	1.0443	N
10	158	164	0.963415	1.03797	N		10	304	3	101.333	0.00986842	Male-biased, strong		10	187	126	1.48413	0.673797	N
11	187	126	1.48413	0.673797	N		11	187	117	1.59829	0.625668	N		11	305	1	305	0.00327869	Male-biased, strong
12	305	1	305	0.00327869	Male-biased, strong		12	159	138	1.15217	0.867925	N		12	300	0	#DIV/0!	0	Male-specific
13	300	0	#DIV/0!	0	Male-specific		13	191	103	1.85437	0.539267	N		13	190	102	1.86275	0.536842	N
14	88	194	0.453608	2.20455	Female-biased		14	155	116	1.33621	0.748387	N		14	88	194	0.453608	2.20455	Female-biased
15	134	136	0.985294	1.01493	N		15	181	86	2.10465	0.475138	Male-biased		15	137	123	1.11382	0.89781	N
16	155	115	1.34783	0.741935	N		16	203	48	4.22917	0.236453	Male-biased, strong		16	127	133	0.954887	1.04724	N
17	41	215	0.190698	5.2439	Female-biased, strong		17	131	118	1.11017	0.900763	N		17	41	215	0.190698	5.2439	Female-biased, strong
18	111	129	0.860465	1.16216	N		18	49	191	0.256545	3.89796	Female-biased		18	139	92	1.51087	0.661871	N
19	224	1	224	0.00446429	Male-biased, strong		19	61	179	0.340782	2.93443	Female-biased		19	224	1	224	0.00446429	Male-biased, strong
20	9	214	0.0420561	23.7778	Female-biased, strong		20	219	1	219	0.00456621	Male-biased, strong		20	9	214	0.0420561	23.7778	Female-biased, strong
21	5	217	0.0230415	43.4	Female-biased, strong		21	7	209	0.0334928	29.8571	Female biased, strong		21	5	217	0.0230415	43.4	Female-biased, strong
22	43	174	0.247126	4.04651	Female-biased, strong		22	38	167	0.227545	4.39474	Female biased, strong		22	43	173	0.248555	4.02326	Female-biased, strong
23	162	46	3.52174	0.283951	Male-biased		23	106	98	1.08163	0.924528	N		23	107	98	1.09184	0.915888	N
24	107	98	1.09184	0.915888	N		24	107	94	1.1383	0.878505	N		24	155	45	3.44444	0.290323	Male-biased
25	167	30	5.56667	0.179641	Male-biased, strong		25	100	94	1.06383	0.94	N		25	170	30	5.66667	0.176471	Male-biased, strong
26	132	65	2.03077	0.492424	Male-biased		26	191	0	#DIV/0!	0	Male-specific		26	107	89	1.20225	0.831776	N
27	192	3	64	0.015625	Male-biased, strong		27	113	70	1.61429	0.619469	N		27	192	3	64	0.015625	Male-biased, strong
28	113	75	1.50667	0.663717	N		28	71	111	0.63964	1.56338	N		28	113	75	1.50667	0.663717	N
29	84	102	0.823529	1.21429	N		29	141	29	4.86207	0.205674	Male-biased, strong		29	84	102	0.823529	1.21429	N
30	45	135	0.333333	3	Female-biased		30	83	85	0.976471	1.0241	N		30	45	139	0.323741	3.08889	Female-biased
31	139	37	3.75676	0.266187	Male-biased		31	76	91	0.835165	1.19737	N		31	139	37	3.75676	0.266187	Male-biased
32	71	102	0.696078	1.43662	N		32	124	41	3.02439	0.330645	Male-biased		32	164	10	16.4	0.0609756	Male-biased, strong
33	163	10	16.3	0.0613497	Male-biased, strong		33	108	46	2.34783	0.425926	Male-biased		33	71	102	0.696078	1.43662	N
34	54	111	0.486486	2.05556	Female-biased		34	75	78	0.961538	1.04	N		34	54	111	0.486486	2.05556	Female-biased
35	7	153	0.0457516	21.8571	Female-biased, strong		35	54	98	0.55102	1.81481	N		35	7	153	0.0457516	21.8571	Female-biased, strong
36	121	37	3.27027	0.305785	Male-biased		36	47	104	0.451923	2.21277	Female-biased		36	121	37	3.27027	0.305785	Male-biased
37	54	98	0.55102	1.81481	N		37	72	76	0.947368	1.05556	N		37	55	98	0.561224	1.78182	N
38	77	73	1.05479	0.948052	N		38	54	93	0.580645	1.72222	N		38	77	73	1.05479	0.948052	N
39	60	87	0.689655	1.45	N		39	17	127	0.133858	7.47059	Female biased, strong		39	60	87	0.689655	1.45	N
40	72	72	1	1	N		40	87	55	1.58182	0.632184	N		40	72	72	1	1	N
41	85	55	1.54545	0.647059	N		41	77	64	1.20312	0.831169	N		41	86	56	1.53571	0.651163	N
42	33	105	0.314286	3.18182	Female-biased		42	59	81	0.728395	1.37288	N		42	82	56	1.46429	0.682927	N
43	68	61	1.11475	0.897059	N		43	60	80	0.75	1.33333	N		43	33	105	0.314286	3.18182	Female-biased
44	54	73	0.739726	1.35185	N		44	31	107	0.28972	3.45161	Female-biased		44	73	59	1.23729	0.808219	N
45	22	104	0.211538	4.72727	Female-biased, strong		45	65	73	0.890411	1.12308	N		45	68	61	1.11475	0.897059	N
46	63	57	1.10526	0.904762	N		46	26	107	0.242991	4.11538	Female biased, strong		46	54	73	0.739726	1.35185	N
47	89	31	2.87097	0.348315	Male-biased		47	99	33	3	0.333333	Male-biased		47	21	100	0.21	4.7619	Female-biased, strong
48	4	114	0.0350877	28.5	Female-biased, strong		48	29	102	0.284314	3.51724	Female-biased		48	63	57	1.10526	0.904762	N
49	97	20	4.85	0.206186	Male-biased, strong		49	62	69	0.898551	1.1129	N		49	100	20	5	0.2	Male-biased, strong
50	35	81	0.432099	2.31429	Female-biased		50	69	50	1.38	0.724638	N		50	4	114	0.0350877	28.5	Female-biased, strong
51	93	19	4.89474	0.204301	Male-biased, strong		51	41	76	0.539474	1.85366	N		51	86	31	2.77419	0.360465	Male-biased
52	69	42	1.64286	0.608696	N		52	93	22	4.22727	0.236559	Male-biased, strong		52	35	81	0.432099	2.31429	Female-biased
53	14	95	0.147368	6.78571	Female-biased, strong		53	36	76	0.473684	2.11111	Female-biased		53	93	19	4.89474	0.204301	Male-biased, strong
54	107	0	#DIV/0!	0	Male-specific		54	83	27	3.07407	0.325301	Male-biased		54	69	42	1.64286	0.608696	N
55	30	75	0.4	2.5	Female-biased		55	108	0	#DIV/0!	0	Male-specific		55	14	95	0.147368	6.78571	Female-biased, strong
56	97	0	#DIV/0!	0	Male-specific		56	4	101	0.039604	25.25	Female biased, strong		56	107	0	#DIV/0!	0	Male-specific
57	46	49	0.938776	1.06522	N		57	16	86	0.186047	5.375	Female biased, strong		57	97	0	#DIV/0!	0	Male-specific
58	15	79	0.189873	5.26667	Female-biased, strong		58	62	39	1.58974	0.629032	N		58	46	49	0.938776	1.06522	N
59	54	38	1.42105	0.703704	N		59	15	84	0.178571	5.6	Female biased, strong		59	15	79	0.189873	5.26667	Female-biased, strong
60	40	51	0.784314	1.275	N		60	96	0	#DIV/0!	0	Male-specific		60	54	38	1.42105	0.703704	N
61	59	31	1.90323	0.525424	N		61	94	0	#DIV/0!	0	Male-specific		61	40	51	0.784314	1.275	N
62	27	54	0.5	2	Female-biased		62	59	31	1.90323	0.525424	N		62	59	31	1.90323	0.525424	N
63	22	52	0.423077	2.36364	Female-biased		63	30	56	0.535714	1.86667	N		63	27	54	0.5	2	Female-biased
64	35	37	0.945946	1.05714	N		64	29	57	0.508772	1.96552	N		64	31	46	0.673913	1.48387	N
65	32	39	0.820513	1.21875	N		65	46	37	1.24324	0.804348	N		65	22	52	0.423077	2.36364	Female-biased
66	6	65	0.0923077	10.8333	Female-biased, strong		66	6	73	0.0821918	12.1667	Female biased, strong		66	35	37	0.945946	1.05714	N
67	70	1	70	0.0142857	Male-biased, strong		67	8	68	0.117647	8.5	Female biased, strong		67	6	65	0.0923077	10.8333	Female-biased, strong
68	2	67	0.0298507	33.5	Female-biased, strong		68	28	44	0.636364	1.57143	N		68	2	68	0.0294118	34	Female-biased, strong
69	53	12	4.41667	0.226415	Male-biased, strong		69	26	45	0.577778	1.73077	N		69	32	38	0.842105	1.1875	N
70	20	44	0.454545	2.2	Female-biased		70	36	35	1.02857	0.972222	N		70	53	12	4.41667	0.226415	Male-biased, strong
71	26	38	0.684211	1.46154	N		71	52	18	2.88889	0.346154	Male-biased		71	26	38	0.684211	1.46154	N
72	18	45	0.4	2.5	Female-biased		72	22	43	0.511628	1.95455	N		72	20	44	0.454545	2.2	Female-biased
73	21	41	0.512195	1.95238	Female-biased		73	21	44	0.477273	2.09524	Female-biased		73	18	45	0.4	2.5	Female-biased
74	28	34	0.823529	1.21429	N		74	21	43	0.488372	2.04762	Female-biased		74	11	51	0.215686	4.63636	Female-biased, strong
75	11	51	0.215686	4.63636	Female-biased, strong		75	16	46	0.347826	2.875	Female-biased		75	21	41	0.512195	1.95238	N
76	35	25	1.4	0.714286	N		76	2	60	0.0333333	30	Female biased, strong		76	28	34	0.823529	1.21429	N
77	5	53	0.0943396	10.6	Female-biased, strong		77	5	54	0.0925926	10.8	Female biased, strong		77	35	25	1.4	0.714286	N
78	53	1	53	0.0188679	Male-biased, strong		78	49	6	8.16667	0.122449	Male-biased, strong		78	5	53	0.0943396	10.6	Female-biased, strong
79	50	2	25	0.04	Male-biased, strong		79	13	42	0.309524	3.23077	Female-biased		79	53	1	53	0.0188679	Male-biased, strong
80	8	44	0.181818	5.5	Female-biased, strong		80	24	30	0.8	1.25	N		80	9	44	0.204545	4.88889	Female-biased, strong
81	29	22	1.31818	0.758621	N		81	12	42	0.285714	3.5	Female-biased		81	50	2	25	0.04	Male-biased, strong
82	30	21	1.42857	0.7	N		82	19	34	0.558824	1.78947	N		82	8	44	0.181818	5.5	Female-biased, strong
83	38	12	3.16667	0.315789	Male-biased		83	53	0	#DIV/0!	0	Male-specific		83	30	21	1.42857	0.7	N
84	24	23	1.04348	0.958333	N		84	27	26	1.03846	0.962963	N		84	29	22	1.31818	0.758621	N
85	24	22	1.09091	0.916667	N		85	50	2	25	0.04	Male-biased, strong		85	38	12	3.16667	0.315789	Male-biased
86	2	42	0.047619	21	Female-biased, strong		86	24	27	0.888889	1.125	N		86	24	23	1.04348	0.958333	N
87	24	17	1.41176	0.708333	N		87	38	12	3.16667	0.315789	Male-biased		87	24	22	1.09091	0.916667	N
88	20	21	0.952381	1.05	N		88	9	41	0.219512	4.55556	Female biased, strong		88	2	40	0.05	20	Female-biased, strong
89	2	39	0.0512821	19.5	Female-biased, strong		89	3	47	0.0638298	15.6667	Female biased, strong		89	2	39	0.0512821	19.5	Female-biased, strong
90	15	23	0.652174	1.53333	N		90	19	29	0.655172	1.52632	N		90	24	17	1.41176	0.708333	N
91	9	27	0.333333	3	Female-biased		91	25	23	1.08696	0.92	N		91	20	21	0.952381	1.05	N
92	10	25	0.4	2.5	Female-biased		92	27	21	1.28571	0.777778	N		92	15	23	0.652174	1.53333	N
93	23	11	2.09091	0.478261	Male-biased		93	3	44	0.0681818	14.6667	Female biased, strong		93	9	27	0.333333	3	Female-biased
94	22	12	1.83333	0.545455	N		94	20	24	0.833333	1.2	N		94	10	25	0.4	2.5	Female-biased
95	19	14	1.35714	0.736842	N		95	3	39	0.0769231	13	Female biased, strong		95	23	11	2.09091	0.478261	Male-biased
96	1	32	0.03125	32	Female-biased, strong		96	15	26	0.576923	1.73333	N		96	22	12	1.83333	0.545455	N
97	3	30	0.1	10	Female-biased, strong		97	23	17	1.35294	0.73913	N		97	1	32	0.03125	32	Female-biased, strong
98	15	17	0.882353	1.13333	N		98	8	30	0.266667	3.75	Female-biased		98	3	30	0.1	10	Female-biased, strong
99	1	30	0.0333333	30	Female-biased, strong		99	9	29	0.310345	3.22222	Female-biased		99	15	17	0.882353	1.13333	N
100	3	27	0.111111	9	Female-biased, strong		100	1	33	0.030303	33	Female biased, strong		100	1	30	0.0333333	30	Female-biased, strong
101	8	20	0.4	2.5	Female-biased		101	10	22	0.454545	2.2	Female-biased		101	3	27	0.111111	9	Female-biased, strong
102	1	27	0.037037	27	Female-biased, strong		102	16	13	1.23077	0.8125	N		102	8	20	0.4	2.5	Female-biased
103	27	0	#DIV/0!	0	Male-specific		103	9	19	0.473684	2.11111	Female-biased		103	1	27	0.037037	27	Female-biased, strong
104	3	24	0.125	8	Female-biased, strong		104	11	16	0.6875	1.45455	N		104	27	0	#DIV/0!	0	Male-specific
105	10	15	0.666667	1.5	N		105	15	12	1.25	0.8	N		105	3	24	0.125	8	Female-biased, strong
106	2	22	0.0909091	11	Female-biased, strong		106	26	0	#DIV/0!	0	Male-specific		106	2	22	0.0909091	11	Female-biased, strong
107	15	7	2.14286	0.466667	Male-biased		107	2	22	0.0909091	11	Female biased, strong		107	15	7	2.14286	0.466667	Male-biased
108	2	19	0.105263	9.5	Female-biased, strong		108	3	20	0.15	6.66667	Female biased, strong		108	2	19	0.105263	9.5	Female-biased, strong
109	8	11	0.727273	1.375	N		109	15	7	2.14286	0.466667	Male-biased		109	8	11	0.727273	1.375	N
110	11	7	1.57143	0.636364	N		110	2	20	0.1	10	Female biased, strong		110	11	7	1.57143	0.636364	N
111	0	18	0	#DIV/0!	Female-specific		111	1	19	0.0526316	19	Female biased, strong		111	0	18	0	#DIV/0!	Female-specific
							112	8	11	0.727273	1.375	N
							113	11	7	1.57143	0.636364	N

## Sheet: 5.Clustifyrmatch for downsample
	Down sampled 1				Down sampled 2				Down sampled 3
Downsampled cluster number	Full data set cluster number	clustifyr spearman correlation		Downsampled cluster number	Full data set cluster number	clustifyr spearman correlation		Downsampled cluster number	Full data set cluster number	clustifyr spearman correlation
0	0	0.959284		0	0	0.951019		0	0	0.959334
47	0	0.890533		54	0	0.884075		51	0	0.890053
2	1	0.980856		1	1	0.982985		3	1	0.980856
21	2	0.947191		7	2	0.973404		21	2	0.947191
35	2	0.943205		2	3	0.98899		35	2	0.943205
4	3	0.986281		3	4	0.977228		2	3	0.990438
67	3	0.908492		4	5	0.974586		1	4	0.977051
1	4	0.977007		13	6	0.965487		4	5	0.977482
5	5	0.977482		24	6	0.949918		13	6	0.963747
3	6	0.985041		5	7	0.98508		26	6	0.954012
6	7	0.98844		106	8	0.868905		5	7	0.98844
103	8	0.869971		25	8	0.938424		104	8	0.869971
18	8	0.950116		6	8	0.970847		16	8	0.948977
8	8	0.967196		17	9	0.971566		7	8	0.967217
7	9	0.98575		30	9	0.952758		6	9	0.98575
9	10	0.975902		22	10	0.954468		8	10	0.975902
14	11	0.978672		48	10	0.939349		14	11	0.978672
13	12	0.982614		19	11	0.959226		64	11	0.918849
27	12	0.947156		63	11	0.921539		12	12	0.982614
10	13	0.974667		10	12	0.982708		27	12	0.947156
12	14	0.970418		26	12	0.944532		9	13	0.974648
19	14	0.969206		9	13	0.969305		11	14	0.970418
17	15	0.972561		20	14	0.968197		19	14	0.969206
20	16	0.971111		8	14	0.972094		17	15	0.972561
11	17	0.988801		46	15	0.939962		20	16	0.971111
22	18	0.971663		57	15	0.933276		10	17	0.988801
30	19	0.96484		21	16	0.975641		22	18	0.971612
81	19	0.854516		11	17	0.987506		30	19	0.964012
16	20	0.989389		18	18	0.968985		84	19	0.854516
110	21	0.811762		36	19	0.966176		42	20	0.971056
23	21	0.958009		92	19	0.835584		44	20	0.959907
34	22	0.971861		14	20	0.990105		110	21	0.811762
79	22	0.9097		113	21	0.776918		24	21	0.956802
33	23	0.97305		15	21	0.955169		34	22	0.971861
59	23	0.942567		35	22	0.972789		81	22	0.9097
25	24	0.976078		85	22	0.903323		32	23	0.973031
76	24	0.930405		32	23	0.970743		60	23	0.942567
46	25	0.95579		61	23	0.936921		25	24	0.976027
64	25	0.930843		16	24	0.990919		77	24	0.930405
32	26	0.980632		49	25	0.957282		48	25	0.95579
38	27	0.97455		70	25	0.927086		66	25	0.930843
24	28	0.987743		28	26	0.986768		33	26	0.980632
15	29	0.970365		41	27	0.973425		38	27	0.97455
42	30	0.975639		23	28	0.988324		23	28	0.987743
26	31	0.981926		31	29	0.973705		18	29	0.9794
28	32	0.983367		78	29	0.918599		43	30	0.975639
39	33	0.984148		44	30	0.976888		15	31	0.967658
40	34	0.98704		12	31	0.957502		28	32	0.983367
72	35	0.942837		27	32	0.98054		39	33	0.984148
29	36	0.971786		43	33	0.979082		40	34	0.98704
48	37	0.976866		37	34	0.986851		73	35	0.942837
36	38	0.977294		75	35	0.938845		29	36	0.971786
50	39	0.975262		58	36	0.966073		50	37	0.976866
43	40	0.983181		56	37	0.959759		36	38	0.977294
31	41	0.994171		33	38	0.974608		52	39	0.975262
41	42	0.98041		53	39	0.973932		45	40	0.983181
61	43	0.964595		34	40	0.975822		31	41	0.994171
84	43	0.928111		29	41	0.991608		41	42	0.977896
65	45	0.956807		40	42	0.981547		62	43	0.964595
82	45	0.944314		62	43	0.962038		86	43	0.928111
52	46	0.98255		86	43	0.928412		69	45	0.955727
54	47	0.974761		45	45	0.980005		83	45	0.944314
78	47	0.95058		50	46	0.985955		54	46	0.98255
66	48	0.949776		55	47	0.97486		56	47	0.974761
44	49	0.978041		83	47	0.948408		79	47	0.95058
49	50	0.988998		66	48	0.956628		67	48	0.949776
57	51	0.980591		42	49	0.969752		46	49	0.978041
62	52	0.965892		47	50	0.992523		49	50	0.988831
68	53	0.960843		65	51	0.973654		58	51	0.980591
83	54	0.931885		64	52	0.973916		63	52	0.965892
60	55	0.974113		76	53	0.96294		68	53	0.959896
86	56	0.930231		87	54	0.925538		85	54	0.931885
51	57	0.990802		51	55	0.960295		61	55	0.974113
53	58	0.961112		93	56	0.930973		88	56	0.928414
58	59	0.962918		52	57	0.987939		53	57	0.990802
63	60	0.974307		39	58	0.949011		55	58	0.961112
77	61	0.957254		59	59	0.960381		59	59	0.962918
70	63	0.986003		72	60	0.956483		65	60	0.974307
37	64	0.946468		77	61	0.972499		78	61	0.957254
80	65	0.956437		73	62	0.973615		72	63	0.986003
75	66	0.967311		74	63	0.981064		37	64	0.946151
55	67	0.944751		38	64	0.94613		82	65	0.956437
56	68	0.999801		67	65	0.955945		74	66	0.967311
89	69	0.954441		81	66	0.961766		80	67	0.964782
45	70	0.934681		88	67	0.968125		57	68	0.999801
71	75	0.948083		60	68	0.99992		89	69	0.954441
74	76	0.975092		89	69	0.958738		47	70	0.936512
73	78	0.770904		79	70	0.976911		71	75	0.948083
97	79	0.955105		84	73	0.979306		76	76	0.975092
95	80	0.85917		90	75	0.972978		75	78	0.770904
69	81	0.988789		68	76	0.975147		98	79	0.955105
90	83	0.964267		82	78	0.751371		70	81	0.988789
87	84	0.978465		95	79	0.964836		92	83	0.964267
88	85	0.974933		80	80	0.986348		90	84	0.978465
85	86	0.982057		71	81	0.996134		91	85	0.974933
91	87	0.949963		96	83	0.967239		87	86	0.982057
96	88	0.97014		91	84	0.983429		93	87	0.949963
99	89	0.964315		94	85	0.975303		97	88	0.97014
100	90	0.979924		69	86	0.970004		100	89	0.964315
93	91	0.976211		99	87	0.951239		101	90	0.979924
104	92	0.969044		100	88	0.9702		95	91	0.976211
92	93	0.979481		97	91	0.984408		105	92	0.969044
101	95	0.974952		101	93	0.970205		94	93	0.979481
102	96	0.982375		98	94	0.974214		102	95	0.974952
98	100	0.972191		103	95	0.96991		103	96	0.982375
106	101	0.975864		111	96	0.955104		99	100	0.972191
94	102	0.985517		104	98	0.963388		106	101	0.975864
105	103	0.977115		105	100	0.973235		96	102	0.985517
108	104	0.941931		110	101	0.972131		108	104	0.941931
111	107	0.965289		107	104	0.953544		111	107	0.965289
109	108	0.973048		108	105	0.963718		109	108	0.973048
107	109	0.991722		102	107	0.932759		107	109	0.991722
				112	108	0.975477
				109	109	0.990863

## Sheet: 6.Full data set vs. matched
	Full data set							Down sampled 1							Down sampled 2							Down sampled 3
Cluster	Male	Female	sex_bias			Cluster	Male	Female	male/female	female/male	sex_bias		Cluster	Male cells	Female cells	male/female	female/male	sex_bias		Cluster	Male cells	Female cells	male/female	female/male	sex_bias
0	734	430	Male-biased			0	718	193	3.72021	0.268802	Male-biased		0	720	190	3.78947	0.263889	Male-biased, strong		0	711	193	3.68394	0.271449	Male-biased
1	215	694	N			1	214	302	0.708609	1.41121	N		1	214	323	0.662539	1.50935	N		1	214	302	0.708609	1.41121	N
2	17	803	Female-biased, strong			2	12	370	0.0324324	30.8333	Female-biased, strong		2	15	361	0.0415512	24.0667	Female-biased, strong		2	12	370	0.0324324	30.8333	Female-biased, strong
3	293	513	N			3	295	239	1.23431	0.810169	N		3	293	210	1.39524	0.716724	N		3	294	239	1.23013	0.812925	N
4	124	659	Female-biased			4	186	351	0.529915	1.8871	N		4	138	311	0.44373	2.25362	Female-biased		4	186	352	0.528409	1.89247	N
5	32	737	Female-biased, strong			5	118	323	0.365325	2.73729	Female-biased		5	116	327	0.35474	2.81897	Female-biased		5	118	323	0.365325	2.73729	Female-biased
6	298	448	N			6	297	192	1.54688	0.646465	N		6	298	197	1.51269	0.661074	N		6	297	192	1.54688	0.646465	N
7	210	484	N			7	208	232	0.896552	1.11538	N		7	206	202	1.0198	0.980583	N		7	208	232	0.896552	1.11538	N
8	220	474	N			8	292	318	0.918239	1.08904	N		8	282	317	0.88959	1.12411	N		8	318	333	0.954955	1.04717	N
9	213	424	N			9	214	196	1.09184	0.915888	N		9	214	203	1.05419	0.948598	N		9	214	196	1.09184	0.915888	N
10	67	554	Female-biased			10	66	261	0.252874	3.95455	Female-biased		10	67	269	0.249071	4.01493	Female-biased, strong		10	66	261	0.252874	3.95455	Female-biased, strong
11	116	466	N			11	88	194	0.453608	2.20455	Female-biased		11	91	235	0.387234	2.58242	Female-biased		11	119	240	0.495833	2.01681	Female-biased
12	576	3	Male-biased, strong			12	492	3	164	0.00609756	Male-biased, strong		12	495	3	165	0.00606061	Male-biased, strong		12	492	3	164	0.00609756	Male-biased, strong
13	148	381	N			13	158	164	0.963415	1.03797	N		13	152	159	0.955975	1.04605	N		13	156	164	0.95122	1.05128	N
14	524	4	Male-biased, strong			14	529	2	264.5	0.00378072	Male-biased, strong		14	534	2	267	0.00374532	Male-biased, strong		14	538	2	269	0.00371747	Male-biased, strong
15	40	438	Female-biased, strong			15	41	215	0.190698	5.2439	Female-biased, strong		15	42	193	0.217617	4.59524	Female-biased, strong		15	41	215	0.190698	5.2439	Female-biased, strong
16	11	444	Female-biased, strong			16	9	214	0.0420561	23.7778	Female-biased, strong		16	7	209	0.0334928	29.8571	Female-biased, strong		16	9	214	0.0420561	23.7778	Female-biased, strong
17	188	265	N			17	187	126	1.48413	0.673797	N		17	187	117	1.59829	0.625668	N		17	187	126	1.48413	0.673797	N
18	53	378	Female-biased			18	43	174	0.247126	4.04651	Female-biased, strong		18	49	191	0.256545	3.89796	Female-biased		18	45	174	0.258621	3.86667	Female-biased
19	77	320	N			19	74	157	0.471338	2.12162	Female-biased		19	74	125	0.592	1.68919	N		19	74	161	0.459627	2.17568	Female-biased
20	154	229	N			20	155	115	1.34783	0.741935	N		20	155	116	1.33621	0.748387	N		20	155	115	1.34783	0.741935	N
21	182	181	Male-biased			21	173	53	3.26415	0.306358	Male-biased		21	192	93	2.06452	0.484375	Male-biased		21	166	52	3.19231	0.313253	Male-biased
22	106	240	N			22	104	113	0.920354	1.08654	N		22	104	100	1.04	0.961538	N		22	104	113	0.920354	1.08654	N
23	214	108	Male-biased, strong			23	217	48	4.52083	0.221198	Male-biased, strong		23	218	41	5.31707	0.188073	Male-biased, strong		23	218	49	4.44898	0.224771	Male-biased, strong
24	201	119	Male-biased			24	202	55	3.67273	0.272277	Male-biased		24	203	48	4.22917	0.236453	Male-biased, strong		24	205	55	3.72727	0.268293	Male-biased
25	99	213	N			25	98	94	1.04255	0.959184	N		25	98	104	0.942308	1.06122	N		25	98	94	1.04255	0.959184	N
26	73	237	N			26	71	102	0.696078	1.43662	N		26	71	111	0.63964	1.56338	N		26	71	102	0.696078	1.43662	N
27	79	217	N			27	77	73	1.05479	0.948052	N		27	77	64	1.20312	0.831169	N		27	79	73	1.08219	0.924051	N
28	107	186	N			28	107	98	1.09184	0.915888	N		28	106	98	1.08163	0.924528	N		28	107	98	1.09184	0.915888	N
29	123	157	N			29	134	136	0.985294	1.01493	N		29	125	97	1.28866	0.776	N		29	129	78	1.65385	0.604651	N
30	32	221	Female-biased			30	33	105	0.314286	3.18182	Female-biased		30	31	107	0.28972	3.45161	Female-biased		30	33	105	0.314286	3.18182	Female-biased
31	118	131	N			31	132	65	2.03077	0.492424	Male-biased		31	159	138	1.15217	0.867925	N		31	135	123	1.09756	0.911111	N
32	114	133	N			32	113	75	1.50667	0.663717	N		32	113	70	1.61429	0.619469	N		32	113	75	1.50667	0.663717	N
33	60	178	N			33	60	87	0.689655	1.45	N		33	60	80	0.75	1.33333	N		33	60	87	0.689655	1.45	N
34	72	161	N			34	72	72	1	1	N		34	72	76	0.947368	1.05556	N		34	72	72	1	1	N
35	32	200	Female-biased			35	18	45	0.4	2.5	Female-biased		35	16	46	0.347826	2.875	Female-biased		35	18	45	0.4	2.5	Female-biased
36	68	163	N			36	84	102	0.823529	1.21429	N		36	62	39	1.58974	0.629032	N		36	84	102	0.823529	1.21429	N
37	4	220	Female-biased, strong			37	4	114	0.0350877	28.5	Female-biased, strong		37	4	101	0.039604	25.25	Female-biased, strong		37	4	114	0.0350877	28.5	Female-biased, strong
38	118	99	Male-biased			38	121	37	3.27027	0.305785	Male-biased		38	108	46	2.34783	0.425926	Male-biased		38	112	37	3.02703	0.330357	Male-biased
39	35	177	Female-biased			39	35	81	0.432099	2.31429	Female-biased		39	36	76	0.473684	2.11111	Female-biased		39	35	81	0.432099	2.31429	Female-biased
40	67	143	N			40	68	61	1.11475	0.897059	N		40	75	78	0.961538	1.04	N		40	68	61	1.11475	0.897059	N
41	137	69	Male-biased, strong			41	139	37	3.75676	0.266187	Male-biased		41	141	29	4.86207	0.205674	Male-biased, strong		41	139	37	3.75676	0.266187	Male-biased
42	85	121	N			42	85	55	1.54545	0.647059	N		42	87	55	1.58182	0.632184	N		42	86	56	1.53571	0.651163	N
43	85	113	N			43	83	54	1.53704	0.650602	N		43	83	58	1.43103	0.698795	N		43	83	54	1.53704	0.650602	N
44	27	167	Female-biased			45	62	60	1.03333	0.967742	N		45	65	73	0.890411	1.12308	N		45	62	59	1.05085	0.951613	N
45	55	122	N			46	69	42	1.64286	0.608696	N		46	69	50	1.38	0.724638	N		46	69	42	1.64286	0.608696	N
46	68	102	N			47	160	1	160	0.00625	Male-biased, strong		47	161	0	#DIV/0!	0	Male-specific		47	160	1	160	0.00625	Male-biased, strong
47	159	2	Male-biased, strong			48	6	65	0.0923077	10.8333	Female-biased, strong		48	6	73	0.0821918	12.1667	Female-biased, strong		48	6	65	0.0923077	10.8333	Female-biased, strong
48	6	155	Female-biased, strong			49	54	73	0.739726	1.35185	N		49	59	81	0.728395	1.37288	N		49	54	73	0.739726	1.35185	N
49	50	106	N			50	97	20	4.85	0.206186	Male-biased, strong		50	99	33	3	0.333333	Male-biased, strong		50	100	20	5	0.2	Male-biased, strong
50	98	57	Male-biased			51	46	49	0.938776	1.06522	N		51	46	37	1.24324	0.804348	N		51	46	49	0.938776	1.06522	N
51	46	108	N			52	27	54	0.5	2	Female-biased		52	29	57	0.508772	1.96552	N		52	27	54	0.5	2	Female-biased
52	29	121	N			53	2	67	0.0298507	33.5	Female-biased, strong		53	2	60	0.0333333	30	Female-biased, strong		53	2	67	0.0298507	33.5	Female-biased, strong
53	2	142	Female-biased, strong			54	38	12	3.16667	0.315789	Male-biased		54	38	12	3.16667	0.315789	Male-biased, strong		54	38	12	3.16667	0.315789	Male-biased
54	56	86	N			55	40	51	0.784314	1.275	N		55	41	76	0.539474	1.85366	N		55	40	51	0.784314	1.275	N
55	37	101	N			56	2	42	0.047619	21	Female-biased, strong		56	3	44	0.0681818	14.6667	Female-biased, strong		56	2	40	0.05	20	Female-biased, strong
56	15	123	Female-biased			57	93	19	4.89474	0.204301	Male-biased, strong		57	93	22	4.22727	0.236559	Male-biased, strong		57	93	19	4.89474	0.204301	Male-biased, strong
57	91	46	Male-biased, strong			58	14	95	0.147368	6.78571	Female-biased, strong		58	17	127	0.133858	7.47059	Female-biased, strong		58	15	125	0.12	8.33333	Female-biased, strong
58	11	120	Female-biased, strong			59	15	79	0.189873	5.26667	Female-biased, strong		59	15	84	0.178571	5.6	Female-biased, strong		59	15	79	0.189873	5.26667	Female-biased, strong
59	7	124	Female-biased, strong			60	22	52	0.423077	2.36364	Female-biased		60	22	43	0.511628	1.95455	N		60	22	52	0.423077	2.36364	Female-biased
60	22	102	Female-biased			61	5	53	0.0943396	10.6	Female-biased, strong		61	5	54	0.0925926	10.8	Female-biased, strong		61	5	53	0.0943396	10.6	Female-biased, strong
61	5	116	Female-biased, strong			63	20	44	0.454545	2.2	Female-biased		62	21	44	0.477273	2.09524	Female-biased		63	20	44	0.454545	2.2	Female-biased
62	23	94	N			64	54	98	0.55102	1.81481	N		63	21	43	0.488372	2.04762	Female-biased		64	55	99	0.555556	1.8	N
63	20	90	Female-biased			65	8	44	0.181818	5.5	Female-biased, strong		64	54	93	0.580645	1.72222	N		65	8	44	0.181818	5.5	Female-biased, strong
64	29	75	N			66	11	51	0.215686	4.63636	Female-biased, strong		65	8	68	0.117647	8.5	Female-biased, strong		66	11	51	0.215686	4.63636	Female-biased, strong
65	8	95	Female-biased, strong			67	30	75	0.4	2.5	Female-biased		66	12	42	0.285714	3.5	Female-biased		67	9	44	0.204545	4.88889	Female-biased, strong
66	15	85	Female-biased			68	97	0	#DIV/0!	0	Male-specific		67	9	41	0.219512	4.55556	Female-biased, strong		68	97	0	#DIV/0!	0	Male-specific
67	8	90	Female-biased, strong			69	2	39	0.0512821	19.5	Female-biased, strong		68	96	0	#DIV/0!	0	Male-specific		69	2	39	0.0512821	19.5	Female-biased, strong
68	95	0	Male-specific			70	22	104	0.211538	4.72727	Female-biased, strong		69	3	47	0.0638298	15.6667	Female-biased, strong		70	21	100	0.21	4.7619	Female-biased, strong
69	2	91	Female-biased, strong			75	26	38	0.684211	1.46154	N		70	13	42	0.309524	3.23077	Female-biased		75	26	38	0.684211	1.46154	N
70	13	79	Female-biased			76	28	34	0.823529	1.21429	N		73	27	26	1.03846	0.962963	N		76	28	34	0.823529	1.21429	N
71	20	72	N			78	21	41	0.512195	1.95238	Female-biased		75	19	29	0.655172	1.52632	N		78	21	41	0.512195	1.95238	Female-biased
72	4	84	Female-biased, strong			79	3	30	0.1	10	Female-biased, strong		76	28	44	0.636364	1.57143	N		79	3	30	0.1	10	Female-biased, strong
73	28	59	N			80	19	14	1.35714	0.736842	N		78	19	34	0.558824	1.78947	N		81	53	12	4.41667	0.226415	Male-biased, strong
74	2	85	Female-biased, strong			81	53	12	4.41667	0.226415	Male-biased, strong		79	3	39	0.0769231	13	Female-biased, strong		83	15	23	0.652174	1.53333	N
75	19	67	N			83	15	23	0.652174	1.53333	N		80	24	30	0.8	1.25	N		84	24	17	1.41176	0.708333	N
76	23	61	N			84	24	17	1.41176	0.708333	N		81	52	18	2.88889	0.346154	Male-biased		85	20	21	0.952381	1.05	N
77	22	61	N			85	20	21	0.952381	1.05	N		83	15	26	0.576923	1.73333	N		86	24	22	1.09091	0.916667	N
78	15	68	Female-biased			86	24	22	1.09091	0.916667	N		84	25	23	1.08696	0.92	N		87	9	27	0.333333	3	Female-biased
79	4	76	Female-biased, strong			87	9	27	0.333333	3	Female-biased		85	20	24	0.833333	1.2	N		88	1	32	0.03125	32	Female-biased, strong
80	26	54	N			88	1	32	0.03125	32	Female-biased, strong		86	26	45	0.577778	1.73077	N		90	3	27	0.111111	9	Female-biased, strong
81	52	27	Male-biased, strong			89	1	30	0.0333333	30	Female-biased, strong		87	9	29	0.310345	3.22222	Female-biased		91	23	11	2.09091	0.478261	Male-biased
82	8	69	Female-biased			90	3	27	0.111111	9	Female-biased, strong		88	1	33	0.030303	33	Female-biased, strong		92	3	24	0.125	8	Female-biased, strong
83	14	61	N			91	23	11	2.09091	0.478261	Male-biased		91	23	17	1.35294	0.73913	N		93	10	25	0.4	2.5	Female-biased
84	24	48	N			92	3	24	0.125	8	Female-biased, strong		93	10	22	0.454545	2.2	Female-biased		95	8	20	0.4	2.5	Female-biased
85	20	51	N			93	10	25	0.4	2.5	Female-biased		94	8	30	0.266667	3.75	Female-biased		96	1	27	0.037037	27	Female-biased, strong
86	23	46	N			95	8	20	0.4	2.5	Female-biased		95	9	19	0.473684	2.11111	Female-biased		100	15	17	0.882353	1.13333	N
87	9	59	Female-biased			96	1	27	0.037037	27	Female-biased, strong		96	1	19	0.0526316	19	Female-biased, strong		101	2	22	0.0909091	11	Female-biased, strong
88	2	66	Female-biased, strong			100	15	17	0.882353	1.13333	N		98	11	16	0.6875	1.45455	N		102	22	12	1.83333	0.545455	N
89	1	60	Female-biased, strong			101	2	22	0.0909091	11	Female-biased, strong		100	15	12	1.25	0.8	N		104	2	19	0.105263	9.5	Female-biased, strong
90	3	55	Female-biased, strong			102	22	12	1.83333	0.545455	N		101	2	20	0.1	10	Female-biased, strong		107	0	18	0	#DIV/0!	Female-specific
91	23	31	N			103	10	15	0.666667	1.5	N		104	2	22	0.0909091	11	Female-biased, strong		108	8	11	0.727273	1.375	N
92	3	51	Female-biased, strong			104	2	19	0.105263	9.5	Female-biased, strong		105	3	20	0.15	6.66667	Female-biased, strong		109	15	7	2.14286	0.466667	Male-biased
93	10	44	Female-biased			107	0	18	0	#DIV/0!	Female-specific		107	16	13	1.23077	0.8125	N
94	7	46	Female-biased			108	8	11	0.727273	1.375	N		108	8	11	0.727273	1.375	N
95	8	43	Female-biased			109	15	7	2.14286	0.466667	Male-biased		109	15	7	2.14286	0.466667	Male-biased
96	1	50	Female-biased, strong
97	0	49	Female-specific
98	10	39	N
99	0	48	Female-specific
100	15	33	N
101	2	44	Female-biased, strong
102	22	24	Male-biased
103	10	33	N
104	1	42	Female-biased, strong
105	3	39	Female-biased, strong
106	2	40	Female-biased, strong
107	0	30	Female-specific
108	8	18	N
109	15	10	Male-biased
110	4	19	Female-biased
111	5	17	N
112	2	17	Female-biased
	total number of cells	17530
