# Supplementary material for: Single-cell transcriptome profiles of Drosophila fruitless-expressing neurons from both sexes
Source: eLife. 2023 Feb 1;12:e78511. doi: 10.7554/eLife.78511 (PMC9891730; doi:10.7554/eLife.78511)
Supplement: Source data 6. — Excel data table containing marker genes for dsx, Kenyon cell, and circadian clock neuron subclustering. [file elife-78511-data6.xlsx]

## Sheet: README
Source data 6: Marker genes for subclustering analyses
Sheet number:	Sheet:		Description
1	dsxSubclustering		Marker genes from dsx subclusters from dsx subclustering analysis
2	KCSubclustering		Marker genes from mushroombody Kenyon cell (KC) subclusters from KC subclustering analysis
3	CircadianSubclustering		Marker genes from circadian subclusters from circadian subclustering analysis

## Sheet: 1.dsxSubclustering
	p_val	avg_logFC	pct.1	pct.2	p_val_adj	cluster	gene
Imp	1.57567e-61	1.91548	0.92	0.038	2.19538e-57	0	Imp
abd-A	2.37611e-59	1.51519	0.876	0.017	3.31063e-55	0	abd-A
Abd-B	9.04432e-37	1.8175	0.69	0.075	1.26015e-32	0	Abd-B
mamo	2.03877e-28	1.19394	0.947	0.588	2.84061e-24	0	mamo
Wnt4	3.86083e-28	1.72023	0.637	0.112	5.37929e-24	0	Wnt4
noe	9.23696e-28	0.640032	1	1	1.28699e-23	0	noe
tsh	5.02236e-27	0.953781	0.558	0.062	6.99765e-23	0	tsh
iab-8	3.54925e-24	0.80129	0.407	0.008	4.94517e-20	0	iab-8
Antp	1.60267e-23	1.09189	0.434	0.021	2.233e-19	0	Antp
ct	1.74301e-23	0.961698	0.416	0.017	2.42853e-19	0	ct
cpx	1.17248e-20	0.660122	0.991	0.975	1.63361e-16	0	cpx
CG43689	8.54191e-19	1.15471	0.31	0.004	1.19014e-14	0	CG43689
Ubx	5.49286e-18	1.04423	0.381	0.038	7.6532e-14	0	Ubx
CG2201	3.38009e-16	0.595015	0.566	0.158	4.70948e-12	0	CG2201
CG3402	4.76843e-16	0.66198	0.876	0.575	6.64385e-12	0	CG3402
CBP	1.6051e-15	0.301623	0.301	0.017	2.23638e-11	0	CBP
sens-2	2.14823e-15	0.472262	0.257	0.004	2.99313e-11	0	sens-2
Dh31	1.04574e-14	1.52323	0.327	0.038	1.45703e-10	0	Dh31
slgA	6.94972e-14	0.527318	0.912	0.8	9.68304e-10	0	slgA
CG9650	1.79762e-13	0.714399	0.292	0.029	2.50463e-09	0	CG9650
CG13928	6.4245e-13	0.413357	0.965	0.967	8.95125e-09	0	CG13928
Rbp	8.2807e-13	0.453318	0.947	0.821	1.15375e-08	0	Rbp
Dscam4	1.69663e-12	0.928237	0.867	0.675	2.36392e-08	0	Dscam4
Lac	1.7579e-12	0.825108	0.327	0.054	2.44928e-08	0	Lac
RpS6	1.83066e-12	0.321038	0.991	0.979	2.55066e-08	0	RpS6
tna	1.30477e-11	0.566734	0.956	0.929	1.81794e-07	0	tna
robo2	1.37932e-11	0.465527	0.372	0.088	1.92181e-07	0	robo2
Pvf3	7.02383e-11	0.791694	0.876	0.658	9.7863e-07	0	Pvf3
CG10650	1.48137e-10	0.355488	0.319	0.062	2.06399e-06	0	CG10650
chrb	1.6758e-10	0.662233	0.956	0.967	2.33489e-06	0	chrb
wry	1.85257e-10	0.443207	0.912	0.562	2.58118e-06	0	wry
Dop1R2	5.64112e-10	0.560568	0.398	0.125	7.85977e-06	0	Dop1R2
CG14989	6.06888e-10	3.41264	0.363	0.108	8.45577e-06	0	CG14989
CG45781	1.01853e-09	0.507633	0.257	0.042	1.41912e-05	0	CG45781
Octbeta1R	1.46464e-09	0.465681	0.496	0.196	2.04069e-05	0	Octbeta1R
nAChRalpha7	1.74359e-09	0.519344	0.982	0.954	2.42935e-05	0	nAChRalpha7
CG12484	9.71163e-09	0.48343	0.46	0.175	0.000135312	0	CG12484
nAChRalpha6	1.10656e-08	0.615097	0.938	0.946	0.000154178	0	nAChRalpha6
otk2	1.16992e-08	0.370657	0.398	0.138	0.000163006	0	otk2
Pp1alpha-96A	2.44816e-08	0.364303	0.912	0.842	0.000341103	0	Pp1alpha-96A
VGAT	6.47293e-08	0.364198	0.372	0.125	0.000901873	0	VGAT
Nnf1a	7.25305e-08	0.294649	0.478	0.192	0.00101057	0	Nnf1a
P5CDh1	7.25789e-08	0.332674	0.584	0.308	0.00101124	0	P5CDh1
scyl	8.18729e-08	0.563523	0.85	0.817	0.00114073	0	scyl
Nrx-1	8.49462e-08	0.446697	0.982	0.925	0.00118355	0	Nrx-1
CG10804	1.07637e-07	0.491352	0.558	0.292	0.0014997	0	CG10804
CG45049	1.23436e-07	0.251099	0.956	0.962	0.00171984	0	CG45049
CG31676	1.38948e-07	0.612076	0.504	0.242	0.00193596	0	CG31676
px	1.79481e-07	0.439507	0.912	0.846	0.00250071	0	px
emc	2.39682e-07	0.573736	0.655	0.458	0.00333949	0	emc
Scp2	2.56877e-07	1.23879	0.655	0.446	0.00357907	0	Scp2
app	3.56629e-07	0.567091	0.549	0.292	0.00496892	0	app
Mmp2	5.14456e-07	0.506834	0.611	0.362	0.00716792	0	Mmp2
drl	5.53331e-07	0.285397	0.628	0.362	0.00770956	0	drl
CG2269	8.85809e-07	0.483357	0.876	0.792	0.012342	0	CG2269
PyK	9.13714e-07	0.254114	0.496	0.225	0.0127308	0	PyK
sdk	9.47667e-07	0.516881	0.407	0.175	0.0132038	0	sdk
eEF2	9.76335e-07	0.330344	0.894	0.862	0.0136033	0	eEF2
Tomosyn	1.38509e-06	0.399564	0.85	0.767	0.0192984	0	Tomosyn
CG30089	2.25345e-06	0.361277	0.575	0.325	0.0313974	0	CG30089
robo3	2.30824e-06	0.519225	0.487	0.262	0.0321608	0	robo3
CG6959	3.47981e-06	0.472014	0.575	0.35	0.0484841	0	CG6959
CR42862	4.53916e-06	0.292769	0.956	0.971	0.0632441	0	CR42862
Cad87A	5.26435e-06	0.381722	0.469	0.242	0.0733481	0	Cad87A
esn	5.53862e-06	0.280852	0.31	0.117	0.0771696	0	esn
Gs1	6.73248e-06	0.357799	0.673	0.512	0.0938037	0	Gs1
Vha44	7.01922e-06	0.302567	0.788	0.704	0.0977988	0	Vha44
CG6543	8.55437e-06	0.271682	0.487	0.254	0.119188	0	CG6543
CG31324	1.17429e-05	0.414701	0.504	0.271	0.163614	0	CG31324
l(2)41Ab	1.20894e-05	0.273737	0.416	0.196	0.168441	0	l(2)41Ab
CG45263	1.24964e-05	0.723862	0.823	0.821	0.174112	0	CG45263
dpr4	1.29864e-05	0.35524	0.637	0.412	0.180939	0	dpr4
plum	1.38947e-05	0.267902	0.593	0.338	0.193595	0	plum
Eno	1.43494e-05	0.326465	0.876	0.871	0.199931	0	Eno
7B2	1.50588e-05	0.356253	0.938	0.996	0.209814	0	7B2
CG7971	1.54188e-05	0.283753	0.929	0.921	0.21483	0	CG7971
kdn	1.79778e-05	0.317164	0.69	0.483	0.250484	0	kdn
CG3726	2.33964e-05	0.441354	0.699	0.533	0.325982	0	CG3726
hig	2.43782e-05	0.597462	0.575	0.392	0.339662	0	hig
Hasp	2.64866e-05	0.347776	0.867	0.792	0.369038	0	Hasp
CG6154	2.6588e-05	0.384319	0.717	0.562	0.370451	0	CG6154
DOR	2.91961e-05	0.35515	0.858	0.779	0.406789	0	DOR
Drat	3.62203e-05	0.263993	0.912	0.871	0.504657	0	Drat
Glut4EF	3.6441e-05	0.270291	0.894	0.771	0.507732	0	Glut4EF
Fs(2)Ket	4.81582e-05	0.304042	0.708	0.471	0.670989	0	Fs(2)Ket
CG32432	5.17985e-05	0.280988	0.416	0.212	0.721709	0	CG32432
Sam-S	5.47787e-05	0.255566	0.788	0.621	0.763231	0	Sam-S
tou	6.52555e-05	0.337207	0.779	0.638	0.909205	0	tou
Sxl	7.18814e-05	0.25546	0.92	0.854	1	0	Sxl
sgll	7.4508e-05	0.278238	0.283	0.117	1	0	sgll
cmpy	7.99265e-05	0.551567	0.894	0.879	1	0	cmpy
unc-104	8.53458e-05	0.301112	0.885	0.875	1	0	unc-104
CG17124	9.74079e-05	0.259755	0.947	0.962	1	0	CG17124
mtt	9.82497e-05	0.287578	0.407	0.212	1	0	mtt
CG31814	0.00012019	0.537906	0.478	0.312	1	0	CG31814
CG34113	0.000129387	0.392341	0.779	0.638	1	0	CG34113
CG33181	0.00014763	0.305549	0.531	0.333	1	0	CG33181
CG32017	0.000158442	0.368018	0.717	0.562	1	0	CG32017
CG9674	0.000183183	0.282987	0.619	0.433	1	0	CG9674
egh	0.00020538	0.311165	0.867	0.771	1	0	egh
CG9005	0.000208261	0.349457	0.566	0.367	1	0	CG9005
twz	0.000214337	0.441195	0.434	0.25	1	0	twz
Lar	0.00026332	0.309566	0.947	0.942	1	0	Lar
CG6184	0.000322225	0.25552	0.619	0.442	1	0	CG6184
CG31323	0.000381611	0.294714	0.425	0.25	1	0	CG31323
l(1)G0156	0.00039006	0.313813	0.761	0.654	1	0	l(1)G0156
Vha68-1	0.000408178	0.324634	0.796	0.742	1	0	Vha68-1
Hs3st-A	0.000450091	0.60275	0.841	0.833	1	0	Hs3st-A
beat-IIIc	0.000465625	0.669135	0.646	0.579	1	0	beat-IIIc
Mob2	0.000468177	0.260083	0.664	0.5	1	0	Mob2
Gfrl	0.000496361	0.483319	0.832	0.692	1	0	Gfrl
CG14431	0.000578493	0.282211	0.434	0.275	1	0	CG14431
kek1	0.000605809	0.313455	0.947	0.862	1	0	kek1
fwe	0.000633145	0.25493	0.841	0.742	1	0	fwe
Gbeta5	0.000633811	0.284591	0.655	0.492	1	0	Gbeta5
Frq1	0.000684823	0.262848	0.956	0.908	1	0	Frq1
beat-IIIb	0.000703256	0.396406	0.69	0.546	1	0	beat-IIIb
CG32264	0.000837456	0.331645	0.858	0.846	1	0	CG32264
kuz	0.000990387	0.332209	0.841	0.8	1	0	kuz
Tet	0.0010504	0.263136	0.92	0.917	1	0	Tet
beat-Vc	0.00121855	0.431792	0.46	0.317	1	0	beat-Vc
bru1	0.00123719	0.399065	0.54	0.375	1	0	bru1
CG6024	0.00123767	0.261523	0.894	0.833	1	0	CG6024
crol	0.00143706	0.254362	0.832	0.767	1	0	crol
Syngr	0.00148795	0.268595	0.407	0.258	1	0	Syngr
akirin	0.00167963	0.276081	0.779	0.683	1	0	akirin
Hex-A	0.00189412	0.285963	0.805	0.688	1	0	Hex-A
Ttd14	0.00208772	0.27746	0.407	0.267	1	0	Ttd14
CG42394	0.00220957	0.308937	0.593	0.496	1	0	CG42394
CG33639	0.00240698	0.312803	0.637	0.5	1	0	CG33639
dpr9	0.00242122	0.263376	0.805	0.729	1	0	dpr9
CG42663	0.00253685	0.338874	0.442	0.325	1	0	CG42663
rad	0.00351772	0.551444	0.814	0.746	1	0	rad
rho	0.00471335	0.45337	0.442	0.3	1	0	rho
Tbh	0.00486823	0.324275	0.31	0.171	1	0	Tbh
eag	0.00643688	0.262032	0.699	0.592	1	0	eag
bab2	0.00648261	0.400307	0.292	0.179	1	0	bab2
Ten-m	0.00669179	0.254629	0.77	0.688	1	0	Ten-m
CG32698	0.00839979	0.412411	0.469	0.367	1	0	CG32698
CG8031	0.00903177	0.250085	0.575	0.492	1	0	CG8031
CG8602	0.00920149	0.266742	0.469	0.338	1	0	CG8602
dpr18	0.00924354	0.35093	0.673	0.621	1	0	dpr18
dpr13	0.00936141	0.394756	0.717	0.592	1	0	dpr13
PMCA	0.0097729	0.290687	0.956	0.971	1	0	PMCA
CG42458	3.14437e-49	1.81415	0.928	0.164	4.38105e-45	1	CG42458
heph	1.96238e-32	1.30039	0.979	0.852	2.73419e-28	1	heph
Fer2	2.827e-31	1.33741	0.856	0.195	3.93886e-27	1	Fer2
Dbx	3.52768e-31	0.520367	0.464	0	4.91511e-27	1	Dbx
Optix	4.72687e-28	0.897962	0.928	0.219	6.58595e-24	1	Optix
otp	4.07457e-26	0.806998	0.938	0.227	5.6771e-22	1	otp
Ac76E	1.58235e-20	0.935501	0.68	0.234	2.20469e-16	1	Ac76E
Rx	3.87004e-20	0.69302	0.588	0.117	5.39213e-16	1	Rx
Vsx1	9.77145e-20	0.597504	0.557	0.113	1.36146e-15	1	Vsx1
Lim1	3.25726e-19	0.636209	0.907	0.375	4.53835e-15	1	Lim1
run	5.6751e-18	0.32955	0.289	0.004	7.90711e-14	1	run
br	1.27122e-17	0.949825	0.732	0.262	1.77119e-13	1	br
Hr51	3.72668e-17	0.525179	0.732	0.211	5.19239e-13	1	Hr51
opa	4.24824e-17	0.270729	0.258	0	5.91907e-13	1	opa
Pxn	5.79459e-17	0.933655	0.825	0.375	8.0736e-13	1	Pxn
CadN	2.38696e-16	0.444454	1	0.984	3.32575e-12	1	CadN
cpo	2.99686e-16	0.576689	1	0.965	4.17552e-12	1	cpo
NetB	9.81349e-16	0.498393	0.887	0.551	1.36731e-11	1	NetB
mbl	9.01515e-15	0.728307	0.99	0.875	1.25608e-10	1	mbl
CR43283	3.30293e-14	0.568886	0.835	0.395	4.60197e-10	1	CR43283
Epac	5.35504e-14	0.718961	0.835	0.531	7.46117e-10	1	Epac
CG4829	3.12933e-13	0.66944	0.619	0.234	4.3601e-09	1	CG4829
jim	1.16893e-12	0.51433	1	0.996	1.62867e-08	1	jim
fru	6.10632e-12	0.522778	0.969	0.973	8.50794e-08	1	fru
otk	6.60748e-12	0.647952	0.825	0.578	9.2062e-08	1	otk
Vsx2	6.86875e-12	0.357025	0.423	0.098	9.57023e-08	1	Vsx2
CG30419	1.23118e-11	0.683614	0.773	0.477	1.7154e-07	1	CG30419
Sema1a	2.32048e-11	0.460444	1	0.988	3.23313e-07	1	Sema1a
Fur1	2.50938e-11	0.710405	0.856	0.582	3.49632e-07	1	Fur1
CG14535	6.73179e-11	0.621502	0.773	0.559	9.3794e-07	1	CG14535
MYPT-75D	1.43384e-10	0.651309	0.742	0.445	1.99777e-06	1	MYPT-75D
Pde9	1.48557e-10	0.459547	1	0.965	2.06984e-06	1	Pde9
klg	2.40137e-10	0.418746	0.979	0.992	3.34582e-06	1	klg
CG32700	3.05639e-10	0.699712	0.804	0.555	4.25847e-06	1	CG32700
LRP1	4.05429e-10	0.628497	0.784	0.504	5.64884e-06	1	LRP1
nAChRalpha5	8.41457e-10	0.484591	1	0.992	1.1724e-05	1	nAChRalpha5
CG46301	1.28897e-09	0.8013	0.804	0.645	1.79592e-05	1	CG46301
Lkr	1.38813e-09	0.376572	0.289	0.059	1.93409e-05	1	Lkr
fz2	1.39264e-09	0.450277	0.918	0.703	1.94037e-05	1	fz2
beat-IIa	2.29624e-09	0.534795	0.835	0.645	3.19935e-05	1	beat-IIa
Dscam2	2.70126e-09	0.323367	1	0.996	3.76367e-05	1	Dscam2
RapGAP1	3.17281e-09	0.482732	0.928	0.855	4.42068e-05	1	RapGAP1
Hsromega	3.74571e-09	0.339493	1	0.992	5.2189e-05	1	Hsromega
Sdc	3.86605e-09	0.348139	0.979	0.977	5.38657e-05	1	Sdc
Cngl	5.75248e-09	0.636693	0.918	0.789	8.01493e-05	1	Cngl
nAChRalpha3	5.7615e-09	0.384802	0.897	0.637	8.0275e-05	1	nAChRalpha3
CNMaR	8.46998e-09	0.505748	0.608	0.309	0.000118012	1	CNMaR
Sema2b	1.0843e-08	0.433464	0.897	0.789	0.000151075	1	Sema2b
CG7991	1.15144e-08	0.851548	0.649	0.438	0.00016043	1	CG7991
Myo81F	2.12115e-08	0.316098	0.99	0.973	0.000295539	1	Myo81F
kug	2.18098e-08	0.368744	0.784	0.453	0.000303876	1	kug
Trim9	3.45189e-08	0.418997	0.711	0.422	0.000480953	1	Trim9
Pkc53E	4.64231e-08	0.384595	0.887	0.719	0.000646813	1	Pkc53E
CG14509	6.49216e-08	0.339227	0.979	0.938	0.000904553	1	CG14509
bnl	7.14594e-08	0.343142	0.33	0.098	0.000995643	1	bnl
GILT3	1.15999e-07	0.37959	0.412	0.148	0.00161621	1	GILT3
nvy	2.29084e-07	0.475578	0.598	0.363	0.00319183	1	nvy
CG11317	2.34005e-07	0.409667	0.608	0.336	0.00326039	1	CG11317
Con	2.4489e-07	0.776844	0.979	0.895	0.00341205	1	Con
Tsp39D	2.45179e-07	0.284091	0.938	0.938	0.00341607	1	Tsp39D
Ace	3.86416e-07	0.345908	0.969	0.965	0.00538393	1	Ace
rin	4.92249e-07	0.262605	0.99	0.973	0.0068585	1	rin
CG2862	6.09747e-07	0.28199	0.959	0.918	0.0084956	1	CG2862
CG32206	6.17649e-07	0.416492	0.814	0.695	0.00860571	1	CG32206
CG11030	6.81475e-07	0.326455	0.897	0.762	0.00949499	1	CG11030
CG33977	1.04695e-06	0.31742	0.856	0.789	0.0145871	1	CG33977
nAChRalpha2	1.13778e-06	0.368395	0.835	0.645	0.0158526	1	nAChRalpha2
HnRNP-K	1.25594e-06	0.325171	0.866	0.762	0.017499	1	HnRNP-K
dpr3	1.35987e-06	0.389656	0.546	0.297	0.0189471	1	dpr3
Eip63E	1.4118e-06	0.353285	0.897	0.871	0.0196706	1	Eip63E
PVRAP	1.83946e-06	0.363398	0.732	0.484	0.0256292	1	PVRAP
Nlg3	2.65401e-06	0.268081	0.99	0.941	0.0369783	1	Nlg3
CG16779	2.9565e-06	0.263219	0.959	0.945	0.0411929	1	CG16779
CG43324	2.95871e-06	0.307842	0.948	0.859	0.0412237	1	CG43324
CG13408	3.17291e-06	0.34938	0.423	0.188	0.0442082	1	CG13408
whd	3.22704e-06	0.282683	0.505	0.258	0.0449624	1	whd
brat	3.26857e-06	0.278729	0.959	0.965	0.0455409	1	brat
CG43795	3.75529e-06	0.378443	0.722	0.461	0.0523225	1	CG43795
CG5934	5.02348e-06	0.327143	0.866	0.77	0.0699922	1	CG5934
mub	5.61403e-06	0.317167	0.979	0.957	0.0782202	1	mub
Hsp23	5.80608e-06	0.269256	1	0.969	0.0808962	1	Hsp23
Frq2	7.38518e-06	0.333819	0.907	0.848	0.102898	1	Frq2
Glut1	7.80474e-06	0.452819	0.918	0.867	0.108743	1	Glut1
dUTPase	8.73006e-06	0.304171	0.763	0.594	0.121636	1	dUTPase
Frq11	1.09167e-05	0.306154	1	0.895	0.152102	1	Frq1
Fife	1.32888e-05	0.269627	0.825	0.625	0.185152	1	Fife
sn	1.32903e-05	0.351374	0.856	0.805	0.185174	1	sn
Tm1	1.8659e-05	0.272071	0.99	0.98	0.259976	1	Tm1
scrt	2.25214e-05	0.354404	0.979	0.98	0.31379	1	scrt
Nipsnap	2.39666e-05	0.274457	0.825	0.691	0.333927	1	Nipsnap
CG1402	2.51797e-05	0.348479	0.402	0.203	0.350829	1	CG1402
nrv2	2.80881e-05	0.327961	0.887	0.777	0.391352	1	nrv2
tok	2.81889e-05	0.302656	0.392	0.188	0.392756	1	tok
ChAT	2.8803e-05	0.335052	0.67	0.469	0.401312	1	ChAT
cathD	3.74372e-05	0.375988	0.866	0.812	0.521613	1	cathD
CG10428	4.02649e-05	0.259347	0.68	0.473	0.561011	1	CG10428
Ost48	4.40645e-05	0.254523	0.928	0.875	0.613951	1	Ost48
nAChRalpha1	4.97472e-05	0.293044	0.938	0.902	0.693128	1	nAChRalpha1
Ktl	5.15281e-05	0.385111	0.897	0.848	0.717941	1	Ktl
GluRIB	5.57228e-05	0.381062	0.835	0.773	0.776386	1	GluRIB
mgl	7.38349e-05	0.419933	0.598	0.434	1	1	mgl
CG3408	7.67647e-05	0.356997	0.505	0.324	1	1	CG3408
Tsp97E	7.97699e-05	0.37818	0.876	0.793	1	1	Tsp97E
cnc	9.02362e-05	0.441134	0.629	0.477	1	1	cnc
GPHR	0.000107054	0.25002	0.722	0.551	1	1	GPHR
CG13685	0.000133367	0.321215	0.804	0.719	1	1	CG13685
CG13375	0.000149061	0.295704	0.515	0.324	1	1	CG13375
orb2	0.000193518	0.26798	0.948	0.953	1	1	orb2
CG2061	0.000200417	0.251273	0.361	0.184	1	1	CG2061
CG31145	0.000200971	0.340103	0.557	0.375	1	1	CG31145
Eip93F	0.00024511	0.66997	0.433	0.254	1	1	Eip93F
beat-IIb	0.000273721	0.281412	0.598	0.402	1	1	beat-IIb
alpha-Man-IIb	0.00029051	0.279189	0.598	0.414	1	1	alpha-Man-IIb
2021-09-01	0.000293619	0.289468	0.784	0.648	1	1	2021-09-01
hfp	0.000315134	0.311372	0.856	0.812	1	1	hfp
CG8460	0.000333068	0.26267	0.649	0.488	1	1	CG8460
Corin	0.000351862	0.424351	0.536	0.371	1	1	Corin
sff	0.000375695	0.289488	0.804	0.672	1	1	sff
CG32052	0.00039333	0.461433	0.515	0.332	1	1	CG32052
jp	0.00041181	0.266924	0.495	0.324	1	1	jp
glob1	0.000491094	0.251074	0.371	0.199	1	1	glob1
CG3961	0.000537849	0.294906	0.577	0.406	1	1	CG3961
Ac78C	0.000896447	0.28719	0.381	0.211	1	1	Ac78C
Hsp27	0.0011225	0.260188	0.866	0.828	1	1	Hsp27
Pax	0.00112736	0.31186	0.443	0.27	1	1	Pax
Pde1c	0.00115174	0.254188	0.804	0.652	1	1	Pde1c
ktub	0.00120231	0.306245	0.299	0.164	1	1	ktub
CG12994	0.00152177	0.302463	0.474	0.316	1	1	CG12994
norpA	0.00169695	0.28047	0.794	0.719	1	1	norpA
rdgA	0.00175998	0.282841	0.825	0.75	1	1	rdgA
CG43078	0.00235199	0.269897	0.485	0.355	1	1	CG43078
CG42541	0.00237516	0.283667	0.938	0.883	1	1	CG42541
Piezo	0.00281653	0.257283	0.423	0.312	1	1	Piezo
dpr2	0.00322599	0.306834	0.567	0.477	1	1	dpr2
RhoGAP102A	0.00332633	0.271687	0.371	0.258	1	1	RhoGAP102A
CG9813	0.00657917	0.293535	0.588	0.496	1	1	CG9813
CG6084	0.00756906	0.297055	0.474	0.379	1	1	CG6084
CG4168	0.00760288	0.269064	0.711	0.617	1	1	CG4168
stan	0.00826167	0.283937	0.464	0.352	1	1	stan
beat-IV	0.00869314	0.252499	0.629	0.496	1	1	beat-IV
CG32532	9.21105e-42	0.87291	0.814	0.071	1.28338e-37	2	CG32532
CG11768	8.87744e-36	1.03584	0.914	0.201	1.23689e-31	2	CG11768
vvl	2.65979e-34	1.08271	1	0.208	3.70588e-30	2	vvl
sv	7.47169e-33	0.763077	0.714	0.071	1.04103e-28	2	sv
DIP-zeta	7.13147e-32	0.945329	0.614	0.049	9.93627e-28	2	DIP-zeta
CG10031	1.48286e-31	0.892053	0.443	0	2.06608e-27	2	CG10031
pros	5.78456e-31	1.50796	1	0.781	8.05963e-27	2	pros
CG14086	1.82717e-29	0.858213	0.414	0	2.5458e-25	2	CG14086
DIP-theta	2.48413e-29	1.14026	1	0.367	3.46113e-25	2	DIP-theta
dpr17	3.12115e-29	1.09363	0.914	0.332	4.3487e-25	2	dpr17
Sox102F	3.60145e-29	0.725731	0.529	0.032	5.0179e-25	2	Sox102F
Drgx	1.89695e-25	0.612602	0.629	0.078	2.64302e-21	2	Drgx
Atox1	9.67681e-25	0.642795	1	0.972	1.34827e-20	2	Atox1
CG15236	1.76015e-24	0.941204	1	0.686	2.45241e-20	2	CG15236
CG15365	1.18408e-23	0.741104	0.657	0.113	1.64978e-19	2	CG15365
Cam	7.72414e-22	0.572557	1	0.996	1.07621e-17	2	Cam
CR45315	3.47319e-20	0.514916	0.414	0.032	4.83919e-16	2	CR45315
Neto	4.80014e-20	0.837847	0.771	0.265	6.68804e-16	2	Neto
CG42342	2.12579e-19	0.808703	1	0.76	2.96186e-15	2	CG42342
CG43759	5.7854e-19	0.844466	0.943	0.548	8.06079e-15	2	CG43759
beat-Ia	5.95927e-19	1.05742	0.914	0.647	8.30305e-15	2	beat-Ia
FK506-bp2	3.44661e-18	0.29845	1	0.996	4.80216e-14	2	FK506-bp2
CG30116	1.76425e-16	0.768425	0.957	0.587	2.45813e-12	2	CG30116
dally	3.64336e-16	0.715574	0.871	0.431	5.07629e-12	2	dally
CG10019	1.77993e-15	0.596915	0.886	0.495	2.47997e-11	2	CG10019
CG14563	2.14506e-15	0.342505	0.329	0.028	2.98872e-11	2	CG14563
Dop1R1	2.53436e-15	0.750102	0.971	0.64	3.53112e-11	2	Dop1R1
dpr16	3.3826e-15	0.557715	0.657	0.205	4.71297e-11	2	dpr16
5-HT2B	4.54117e-15	0.658061	0.629	0.173	6.32721e-11	2	5-HT2B
His4r	4.83828e-15	0.285561	1	1	6.74117e-11	2	His4r
tfc	8.45324e-15	0.398254	0.414	0.06	1.17779e-10	2	tfc
CG42339	3.86007e-14	0.477378	0.786	0.286	5.37823e-10	2	CG42339
Ssb-c31a	3.96915e-14	0.493362	0.971	0.876	5.53022e-10	2	Ssb-c31a
jim1	4.6299e-14	0.759746	1	0.996	6.45084e-10	2	jim
CG463011	9.22992e-14	0.642881	0.943	0.625	1.28601e-09	2	CG46301
CG31221	2.15681e-13	0.574756	0.986	0.837	3.00508e-09	2	CG31221
ST6Gal	2.18433e-13	0.480541	0.771	0.279	3.04343e-09	2	ST6Gal
CG44422	2.23592e-13	0.680185	0.929	0.587	3.11531e-09	2	CG44422
CycJ	7.96709e-13	0.396956	0.529	0.131	1.11006e-08	2	CycJ
CG8641	3.42089e-12	0.531911	0.8	0.364	4.76632e-08	2	CG8641
CG32204	4.77115e-12	0.674494	0.743	0.357	6.64765e-08	2	CG32204
ab	5.87516e-12	0.595326	0.886	0.572	8.18586e-08	2	ab
sfl	1.02283e-11	0.467529	0.829	0.449	1.42511e-07	2	sfl
CG12163	1.55047e-11	0.547711	0.786	0.445	2.16027e-07	2	CG12163
chinmo	2.34462e-11	0.503028	1	0.947	3.26676e-07	2	chinmo
hdc	2.97974e-11	0.491737	0.986	0.784	4.15167e-07	2	hdc
hig1	3.02072e-11	0.277591	0.829	0.357	4.20876e-07	2	hig
beat-Ib	5.48591e-11	0.535489	0.971	0.604	7.64352e-07	2	beat-Ib
CG11319	6.53932e-11	0.516735	0.914	0.615	9.11123e-07	2	CG11319
CG32982	1.40158e-10	0.442304	0.771	0.389	1.95283e-06	2	CG32982
DIP-gamma	1.52163e-10	0.634151	0.8	0.516	2.12009e-06	2	DIP-gamma
Octbeta2R	1.82507e-10	0.552314	0.929	0.703	2.54286e-06	2	Octbeta2R
CanB2	2.79564e-10	0.347901	1	0.989	3.89517e-06	2	CanB2
Mp	3.49111e-10	0.515204	1	0.795	4.86416e-06	2	Mp
emc1	4.12669e-10	0.359264	0.929	0.42	5.74972e-06	2	emc
TrissinR	4.37767e-10	0.522282	0.771	0.406	6.0994e-06	2	TrissinR
CG14864	4.98128e-10	0.304783	0.443	0.117	6.94041e-06	2	CG14864
tup	7.17779e-10	0.348446	0.5	0.145	1.00008e-05	2	tup
pdm3	1.3789e-09	0.565386	0.843	0.449	1.92122e-05	2	pdm3
Sulf1	1.53109e-09	0.313553	0.5	0.163	2.13327e-05	2	Sulf1
CG30424	2.3835e-09	0.27239	0.3	0.057	3.32093e-05	2	CG30424
kek2	2.80655e-09	0.460252	1	0.746	3.91036e-05	2	kek2
pgant2	6.28456e-09	0.441418	0.857	0.509	8.75628e-05	2	pgant2
kirre	6.83894e-09	0.389449	0.986	0.841	9.5287e-05	2	kirre
trv	6.91314e-09	0.276916	1	0.975	9.63207e-05	2	trv
dysc	7.13279e-09	0.373317	1	0.989	9.93812e-05	2	dysc
CG16892	8.47474e-09	0.418357	0.671	0.35	0.000118079	2	CG16892
Pde6	1.75002e-08	0.336482	1	0.883	0.00024383	2	Pde6
caps	1.78691e-08	0.472712	0.886	0.689	0.000248971	2	caps
CG43729	1.85765e-08	0.431671	1	0.929	0.000258826	2	CG43729
CR432831	4.0081e-08	0.417954	0.814	0.442	0.000558448	2	CR43283
beat-Ic	6.83722e-08	0.344051	0.957	0.608	0.00095263	2	beat-Ic
CG41681	9.14513e-08	0.463136	0.871	0.587	0.00127419	2	CG4168
rgn	9.71244e-08	0.507019	0.743	0.42	0.00135323	2	rgn
rst	1.03706e-07	0.330569	0.743	0.389	0.00144494	2	rst
SLO2	1.2283e-07	0.494644	0.829	0.587	0.00171139	2	SLO2
Slob	1.31773e-07	0.365621	0.857	0.608	0.00183599	2	Slob
Pde11	3.60799e-07	0.520871	0.643	0.339	0.00502702	2	Pde11
Srp9	5.30373e-07	0.312611	0.957	0.848	0.00738969	2	Srp9
pxb	5.36541e-07	0.367605	0.829	0.527	0.00747563	2	pxb
pyd	6.39364e-07	0.279489	0.786	0.438	0.00890826	2	pyd
CanA-14F	8.95046e-07	0.25613	0.986	0.958	0.0124707	2	CanA-14F
crb	1.33481e-06	0.334075	0.429	0.145	0.0185978	2	crb
Ten-a	1.61152e-06	0.324688	1	0.975	0.0224533	2	Ten-a
msi	1.63996e-06	0.305916	1	0.929	0.0228496	2	msi
beat-Va	1.69981e-06	0.299529	0.7	0.382	0.0236834	2	beat-Va
dati	1.80825e-06	0.35953	0.914	0.611	0.0251943	2	dati
CG14762	1.92732e-06	0.327791	0.971	0.799	0.0268534	2	CG14762
dpr12	2.04217e-06	0.330721	0.943	0.845	0.0284535	2	dpr12
trn	2.13574e-06	0.480375	0.8	0.569	0.0297573	2	trn
U4-U6-60K	2.98449e-06	0.363614	0.786	0.569	0.0415829	2	U4-U6-60K
beat-IIIb1	3.32935e-06	0.28324	0.829	0.534	0.0463879	2	beat-IIIb
Dop2R	4.63352e-06	0.317761	0.943	0.763	0.0645588	2	Dop2R
PrBP	4.86874e-06	0.346267	0.886	0.724	0.0678362	2	PrBP
Sema1a1	5.00263e-06	0.258426	1	0.989	0.0697016	2	Sema1a
CG34155	5.05567e-06	0.289569	0.814	0.456	0.0704406	2	CG34155
CG4341	5.47163e-06	0.441313	0.743	0.527	0.0762362	2	CG4341
CG32521	6.54549e-06	0.316882	0.786	0.537	0.0911982	2	CG32521
CG437951	7.21213e-06	0.252733	0.814	0.463	0.100487	2	CG43795
CG1504	1.00782e-05	0.259394	0.743	0.417	0.140419	2	CG1504
CG14015	1.03274e-05	0.396697	0.757	0.491	0.143892	2	CG14015
FMRFaR	1.09719e-05	0.50617	0.571	0.322	0.152871	2	FMRFaR
oaf	1.1331e-05	0.320241	0.557	0.29	0.157875	2	oaf
mam	1.50553e-05	0.292108	0.957	0.89	0.209766	2	mam
Lmpt	1.75693e-05	0.349873	0.643	0.42	0.244792	2	Lmpt
Dscam3	2.26222e-05	0.372236	0.729	0.449	0.315195	2	Dscam3
DopEcR	2.66331e-05	0.301702	1	0.951	0.371079	2	DopEcR
CG6180	4.16304e-05	0.295165	0.843	0.569	0.580036	2	CG6180
sick	5.77498e-05	0.415686	0.657	0.435	0.804628	2	sick
CG32137	5.77511e-05	0.251358	0.386	0.17	0.804646	2	CG32137
Hk	6.331e-05	0.258117	0.986	0.922	0.882098	2	Hk
lbk	8.69123e-05	0.282025	0.757	0.583	1	2	lbk
X11Lbeta	0.00010206	0.26145	0.914	0.696	1	2	X11Lbeta
Nca	0.000159102	0.272718	0.929	0.852	1	2	Nca
VhaAC45	0.000191099	0.251869	0.786	0.583	1	2	VhaAC45
Rh7	0.000209372	0.361531	0.514	0.304	1	2	Rh7
Apf	0.000381481	0.259154	0.586	0.35	1	2	Apf
sty	0.00038225	0.344973	0.943	0.781	1	2	sty
nolo	0.000476151	0.42444	0.814	0.682	1	2	nolo
CG14372	0.000487328	0.252142	0.757	0.555	1	2	CG14372
CG31690	0.000564404	0.289873	0.743	0.583	1	2	CG31690
GlcAT-P	0.000572499	0.259783	0.771	0.608	1	2	GlcAT-P
rn	0.000643556	0.32008	0.371	0.191	1	2	rn
Ace1	0.000826948	0.25127	0.986	0.961	1	2	Ace
shn	0.00117487	0.278979	0.414	0.24	1	2	shn
Rgk3	0.00122993	0.266654	0.629	0.417	1	2	Rgk3
5-HT2A	0.00139227	0.254234	0.571	0.364	1	2	5-HT2A
CG32758	0.00287932	0.252723	0.643	0.435	1	2	CG32758
Hr38	0.00836664	0.353496	0.857	0.806	1	2	Hr38
RunxA	3.77549e-40	1.04559	0.769	0.05	5.26039e-36	3	RunxA
Dscam31	4.70015e-25	1.13966	1	0.419	6.54871e-21	3	Dscam3
otp1	8.84707e-25	1.12651	0.981	0.326	1.23266e-20	3	otp
CG31997	8.89387e-25	1.31632	0.808	0.169	1.23918e-20	3	CG31997
Optix1	1.68337e-23	1.10021	1	0.312	2.34544e-19	3	Optix
Dh44	6.25991e-22	1.18338	0.596	0.086	8.72193e-18	3	Dh44
TyrR	5.46316e-21	0.963898	0.885	0.336	7.61182e-17	3	TyrR
CG10384	1.99898e-19	1.00389	1	0.664	2.78518e-15	3	CG10384
SPR	6.44807e-19	0.796407	0.827	0.246	8.9841e-15	3	SPR
Ilp7	4.22958e-18	0.794271	0.346	0.02	5.89308e-14	3	Ilp7
Fili	3.76273e-17	0.619263	0.962	0.412	5.24261e-13	3	Fili
Trx-2	5.0081e-16	0.757797	1	0.95	6.97778e-12	3	Trx-2
hth	5.02262e-16	0.914925	1	0.738	6.99802e-12	3	hth
beat-VII	6.06449e-16	0.823787	0.962	0.515	8.44965e-12	3	beat-VII
Hr511	9.58015e-16	0.669422	0.827	0.272	1.3348e-11	3	Hr51
dpr6	4.61212e-15	0.98433	0.942	0.575	6.42607e-11	3	dpr6
Fer21	5.69676e-15	0.575338	0.923	0.282	7.9373e-11	3	Fer2
bab21	7.1386e-15	0.569133	0.635	0.143	9.94621e-11	3	bab2
Ten-a1	2.66559e-14	0.566057	1	0.977	3.71397e-10	3	Ten-a
Ddc	3.52317e-14	0.680444	0.712	0.233	4.90883e-10	3	Ddc
Scgdelta	3.91953e-14	0.343002	0.288	0.02	5.46108e-10	3	Scgdelta
Fas3	1.66162e-13	0.883958	1	0.575	2.31513e-09	3	Fas3
CG31475	1.88235e-13	0.571492	0.731	0.239	2.62267e-09	3	CG31475
luna	4.62079e-13	0.695313	1	0.847	6.43815e-09	3	luna
chic	7.26631e-13	0.538037	0.981	0.977	1.01242e-08	3	chic
Drl-2	1.26672e-12	0.698438	0.865	0.425	1.76492e-08	3	Drl-2
Act42A	1.57599e-12	0.643976	1	0.973	2.19583e-08	3	Act42A
GstZ2	2.82e-12	0.633734	0.981	0.787	3.92911e-08	3	GstZ2
Eip63F-1	3.49833e-12	1.10661	0.519	0.15	4.87423e-08	3	Eip63F-1
MRE16	3.81114e-12	0.461402	1	0.973	5.31007e-08	3	MRE16
CG13288	5.29973e-12	0.379171	0.481	0.103	7.38411e-08	3	CG13288
ringer	7.84173e-12	0.438816	1	0.94	1.09259e-07	3	ringer
simj	1.59284e-11	0.545776	0.904	0.605	2.2193e-07	3	simj
Syn1	1.60312e-11	0.667941	0.942	0.904	2.23363e-07	3	Syn1
Dh44-R2	1.63567e-11	0.663272	0.558	0.173	2.27898e-07	3	Dh44-R2
bab1	1.86298e-11	0.418661	0.423	0.076	2.5957e-07	3	bab1
CG42361	2.01243e-11	0.497243	1	0.894	2.80391e-07	3	CG42361
CG30172	2.99735e-11	0.331333	1	0.997	4.17621e-07	3	CG30172
CG3940	3.40085e-11	0.34495	0.308	0.04	4.73841e-07	3	CG3940
CR44024	3.59063e-11	0.50967	0.731	0.286	5.00283e-07	3	CR44024
Argk	4.85461e-11	0.404698	1	0.99	6.76392e-07	3	Argk
LpR2	7.71666e-11	0.555637	0.692	0.279	1.07516e-06	3	LpR2
Tina-1	1.58777e-10	0.525546	0.981	0.897	2.21224e-06	3	Tina-1
CG31637	1.76206e-10	0.858993	0.846	0.575	2.45508e-06	3	CG31637
CG31751	1.79553e-10	0.575923	0.404	0.093	2.50172e-06	3	CG31751
sno	2.30143e-10	0.689019	0.962	0.781	3.20658e-06	3	sno
pdm31	3.95654e-10	0.530349	0.904	0.462	5.51264e-06	3	pdm3
exd	4.73655e-10	0.506998	0.923	0.551	6.59944e-06	3	exd
Act5C	7.8559e-10	0.381858	1	0.993	1.09456e-05	3	Act5C
LpR1	8.20491e-10	0.569024	0.846	0.468	1.14319e-05	3	LpR1
Sec61beta	1.24089e-09	0.402869	1	0.93	1.72894e-05	3	Sec61beta
CG43737	2.01963e-09	0.450031	1	0.927	2.81395e-05	3	CG43737
Akap200	3.32872e-09	0.459891	0.942	0.821	4.63791e-05	3	Akap200
CG44837	3.90583e-09	0.523192	0.75	0.409	5.44199e-05	3	CG44837
CG31191	4.4923e-09	0.508322	0.885	0.555	6.25913e-05	3	CG31191
roX2	8.97056e-09	0.622281	0.962	0.804	0.000124987	3	roX2
noc	9.18643e-09	0.479453	0.692	0.332	0.000127995	3	noc
fax	1.10561e-08	0.305666	1	0.993	0.000154045	3	fax
Rx1	1.29982e-08	0.372893	0.577	0.189	0.000181104	3	Rx
NK7.1	1.55224e-08	0.597742	0.692	0.349	0.000216274	3	NK7.1
RhoGAP100F	1.67685e-08	0.391166	0.981	0.963	0.000233636	3	RhoGAP100F
sdt	2.0729e-08	0.409935	1	0.887	0.000288817	3	sdt
Tapdelta	2.19815e-08	0.403602	0.962	0.731	0.000306268	3	Tapdelta
Oct-TyrR	2.87974e-08	0.396674	0.846	0.495	0.000401234	3	Oct-TyrR
Msp300	3.54631e-08	0.474023	1	0.98	0.000494108	3	Msp300
CG425411	3.98706e-08	0.494419	1	0.88	0.000555517	3	CG42541
dpr11	4.27652e-08	0.428188	1	0.668	0.000595848	3	dpr11
CG34114	4.40292e-08	0.623937	0.942	0.591	0.000613459	3	CG34114
SKIP	4.66472e-08	0.645596	0.904	0.708	0.000649935	3	SKIP
CG44838	4.69901e-08	0.407512	0.788	0.432	0.000654714	3	CG44838
CG433241	6.08688e-08	0.459691	1	0.864	0.000848086	3	CG43324
dati1	6.87122e-08	0.441044	1	0.615	0.000957367	3	dati
bru3	7.04507e-08	0.36275	1	0.96	0.000981589	3	bru3
Prp3	7.84878e-08	0.276129	0.442	0.146	0.00109357	3	Prp3
CG9368	8.9827e-08	0.459817	0.904	0.688	0.00125156	3	CG9368
CG14767	9.33345e-08	0.371467	0.942	0.781	0.00130043	3	CG14767
klar	9.76647e-08	0.430768	0.981	0.894	0.00136076	3	klar
Swip-1	1.11348e-07	0.424463	0.962	0.834	0.00155142	3	Swip-1
CG12279	1.12285e-07	0.449776	0.865	0.628	0.00156446	3	CG12279
Scgbeta	1.35685e-07	0.479532	0.981	0.787	0.0018905	3	Scgbeta
alphaTub84B	1.55077e-07	0.336273	1	0.997	0.00216069	3	alphaTub84B
CG7920	1.72921e-07	0.307331	0.904	0.681	0.00240931	3	CG7920
CaMKI	1.85192e-07	0.365161	0.942	0.811	0.00258028	3	CaMKI
NetB1	2.12928e-07	0.779336	0.904	0.598	0.00296672	3	NetB
CG6583	2.16321e-07	0.356695	0.5	0.193	0.003014	3	CG6583
tsr	2.98584e-07	0.531017	1	0.967	0.00416017	3	tsr
ND-B14	3.14054e-07	0.334814	0.962	0.907	0.00437571	3	ND-B14
Gpb5	3.6424e-07	0.361704	0.615	0.276	0.00507495	3	Gpb5
MED7	3.69945e-07	0.446238	0.808	0.585	0.00515445	3	MED7
stai	4.00998e-07	0.268244	1	0.957	0.00558711	3	stai
yki	4.42397e-07	0.34056	0.654	0.339	0.00616392	3	yki
CG4101	4.76625e-07	0.348314	1	0.884	0.00664081	3	CG4101
elB	5.48354e-07	0.420052	0.788	0.495	0.00764022	3	elB
Dim1	7.06169e-07	0.384019	0.865	0.674	0.00983905	3	Dim1
CG12594	7.10387e-07	0.527216	0.827	0.548	0.00989782	3	CG12594
CG33107	8.43286e-07	0.345408	0.558	0.256	0.0117495	3	CG33107
CG17716	1.0836e-06	0.347469	0.962	0.854	0.0150977	3	CG17716
Hs3st-B	1.30249e-06	0.458419	0.885	0.784	0.0181475	3	Hs3st-B
CG42594	1.30624e-06	0.371015	0.942	0.641	0.0181999	3	CG42594
Bgb	1.45816e-06	0.324826	0.981	0.85	0.0203166	3	Bgb
dpr7	1.45934e-06	0.3211	1	0.92	0.0203329	3	dpr7
CG9914	1.55748e-06	0.276671	0.269	0.063	0.0217003	3	CG9914
His3.3A	1.66508e-06	0.312405	1	0.917	0.0231995	3	His3.3A
viaf	1.83479e-06	0.400848	0.865	0.718	0.0255641	3	viaf
Rbp9	1.8525e-06	0.278437	1	0.983	0.0258108	3	Rbp9
Pka-R1	2.0816e-06	0.475465	0.846	0.512	0.0290029	3	Pka-R1
CG33543	2.59377e-06	0.633613	0.904	0.761	0.0361391	3	CG33543
CG7708	2.6241e-06	0.33852	0.769	0.452	0.0365616	3	CG7708
CG59341	3.36219e-06	0.374924	0.923	0.774	0.0468454	3	CG5934
CRMP	3.69184e-06	0.339212	0.981	0.91	0.0514384	3	CRMP
CG15537	3.80589e-06	0.528478	0.423	0.159	0.0530274	3	CG15537
mri	4.12763e-06	0.344979	0.577	0.279	0.0575102	3	mri
CG12730	4.3317e-06	0.486334	0.385	0.153	0.0603535	3	CG12730
CG42674	4.45535e-06	0.313319	0.923	0.708	0.0620764	3	CG42674
betaTub56D	4.47803e-06	0.347938	1	0.993	0.0623924	3	betaTub56D
Spred	5.10467e-06	0.324116	0.942	0.827	0.0711234	3	Spred
mgr	6.18635e-06	0.336093	0.942	0.804	0.0861944	3	mgr
comm	6.34249e-06	0.296644	0.654	0.342	0.08837	3	comm
CG8974	6.47761e-06	0.335299	0.827	0.608	0.0902525	3	CG8974
CG14312	6.49028e-06	0.269421	1	0.924	0.090429	3	CG14312
Gld2	6.81536e-06	0.281971	0.442	0.179	0.0949584	3	Gld2
AP-1sigma	7.04605e-06	0.283068	0.981	0.874	0.0981727	3	AP-1sigma
CG7985	7.11186e-06	0.325663	0.692	0.409	0.0990896	3	CG7985
CG11000	7.54255e-06	0.332322	0.827	0.558	0.10509	3	CG11000
Not10	8.03554e-06	0.251222	0.423	0.166	0.111959	3	Not10
CG9932	8.14941e-06	0.497163	0.788	0.485	0.113546	3	CG9932
mRpS26	9.53579e-06	0.259778	0.712	0.419	0.132862	3	mRpS26
CG16817	1.03049e-05	0.309128	1	0.914	0.143578	3	CG16817
nvy1	1.20884e-05	0.29605	0.692	0.382	0.168428	3	nvy
bma	1.29184e-05	0.402324	0.615	0.332	0.179992	3	bma
CG2059	1.32307e-05	0.300585	0.481	0.206	0.184344	3	CG2059
CG15041	1.73533e-05	0.38806	0.712	0.442	0.241784	3	CG1504
ND-SGDH	1.74225e-05	0.268365	0.942	0.777	0.242747	3	ND-SGDH
CG6770	1.78067e-05	0.307348	1	0.95	0.2481	3	CG6770
mRpL27	1.78204e-05	0.311487	0.865	0.568	0.248292	3	mRpL27
CSN8	1.8975e-05	0.319895	0.808	0.551	0.264379	3	CSN8
CG11982	1.94457e-05	0.252479	0.5	0.226	0.270937	3	CG11982
bru11	1.99923e-05	0.267862	0.654	0.389	0.278554	3	bru1
cib	2.25535e-05	0.369982	0.923	0.827	0.314238	3	cib
CG9391	2.44297e-05	0.27571	0.692	0.422	0.340378	3	CG9391
Rap2l	2.6957e-05	0.254964	0.865	0.651	0.375592	3	Rap2l
CG13585	2.98527e-05	0.289	0.904	0.738	0.415938	3	CG13585
Tpi	3.08454e-05	0.284843	0.942	0.761	0.429769	3	Tpi
Nup62	3.42773e-05	0.288486	0.692	0.405	0.477585	3	Nup62
kuz1	3.42786e-05	0.283973	0.981	0.784	0.477603	3	kuz
l(1)G0469	3.99931e-05	0.28106	0.731	0.449	0.557224	3	l(1)G0469
Kank	4.3652e-05	0.268098	0.885	0.751	0.608204	3	Kank
Pect	5.14416e-05	0.376562	0.808	0.611	0.716736	3	Pect
dpr91	5.28118e-05	0.385909	0.942	0.721	0.735827	3	dpr9
sqh	5.36298e-05	0.277364	0.981	0.791	0.747224	3	sqh
jigr1	5.48613e-05	0.302203	0.615	0.355	0.764383	3	jigr1
eIF4E1	5.84113e-05	0.252746	1	0.914	0.813845	3	eIF4E1
CG12173	6.56822e-05	0.26806	0.808	0.548	0.915149	3	CG12173
mRpL22	8.0088e-05	0.269187	0.75	0.555	1	3	mRpL22
CG13108	9.01942e-05	0.270344	0.981	0.91	1	3	CG13108
CG2258	9.06927e-05	0.25708	0.712	0.449	1	3	CG2258
Ntf-2	9.16249e-05	0.254948	0.981	0.867	1	3	Ntf-2
ND-30	9.59436e-05	0.288968	0.846	0.648	1	3	ND-30
CG42260	0.000105145	0.323987	0.981	0.924	1	3	CG42260
lbm	0.000112236	0.460107	0.462	0.233	1	3	lbm
p47	0.000113712	0.34894	0.75	0.575	1	3	p47
UQCR-11	0.000116415	0.261265	1	0.967	1	3	UQCR-11
Cyt-b5	0.000134369	0.265624	0.942	0.748	1	3	Cyt-b5
Arpc4	0.000151019	0.314619	0.885	0.801	1	3	Arpc4
Shawl	0.000160469	0.396741	0.577	0.365	1	3	Shawl
CR45332	0.000160734	0.358193	0.615	0.369	1	3	CR45332
CG42337	0.000161092	0.436602	0.75	0.601	1	3	CG42337
l(2)SH0834	0.00018023	0.298117	0.712	0.465	1	3	l(2)SH0834
CG44242	0.000208206	0.268075	0.981	0.907	1	3	CG44242
GILT31	0.000248826	0.282835	0.404	0.189	1	3	GILT3
Alg-2	0.0002697	0.26364	0.885	0.698	1	3	Alg-2
Ubc7	0.0002771	0.255424	0.481	0.246	1	3	Ubc7
cic	0.000290258	0.285388	0.923	0.841	1	3	cic
CG11077	0.000292155	0.250828	0.423	0.219	1	3	CG11077
Ostgamma	0.000321735	0.318022	0.808	0.698	1	3	Ostgamma
CG13594	0.000327113	0.260149	0.712	0.495	1	3	CG13594
eIF2beta	0.000338712	0.253328	0.865	0.688	1	3	eIF2beta
Roc1a	0.000354877	0.26495	0.981	0.897	1	3	Roc1a
CG110301	0.00037758	0.254024	0.904	0.781	1	3	CG11030
sm	0.000437268	0.376422	1	0.99	1	3	sm
Arf102F	0.000459589	0.27381	0.923	0.831	1	3	Arf102F
CG9413	0.00047063	0.336735	0.75	0.615	1	3	CG9413
CG42806	0.000520572	0.264442	0.596	0.372	1	3	CG42806
nrv21	0.000531905	0.258274	0.923	0.787	1	3	nrv2
Manf	0.000549271	0.274765	0.635	0.442	1	3	Manf
sr	0.000578925	0.531292	0.692	0.442	1	3	sr
Pis	0.000582902	0.25873	0.885	0.754	1	3	Pis
Ras85D	0.000600589	0.252163	0.923	0.804	1	3	Ras85D
CG32267	0.000615575	0.262627	0.981	0.771	1	3	CG32267
jeb	0.000616037	0.255081	0.962	0.88	1	3	jeb
Drep1	0.000650945	0.283743	0.731	0.525	1	3	Drep1
CG5168	0.0009141	0.264003	0.731	0.535	1	3	CG5168
CG31075	0.000991128	0.329095	0.538	0.342	1	3	CG31075
SLO21	0.0010119	0.253678	0.808	0.605	1	3	SLO2
CG3226	0.00106133	0.267609	0.731	0.548	1	3	CG3226
CG10283	0.0010921	0.251768	0.404	0.223	1	3	CG10283
DIP-delta	0.0011122	0.411766	0.769	0.608	1	3	DIP-delta
Arf51F	0.00120776	0.253138	0.712	0.558	1	3	Arf51F
Su(var)205	0.00123312	0.256908	1	0.884	1	3	Su(var)205
Xbp1	0.00125576	0.299173	0.538	0.352	1	3	Xbp1
Tl	0.00133232	0.413187	0.538	0.355	1	3	Tl
MESR3	0.00135303	0.25868	0.423	0.226	1	3	MESR3
CG15803	0.00139304	0.284855	0.577	0.385	1	3	CG15803
Tango11	0.00150034	0.271981	0.692	0.545	1	3	Tango11
Prosbeta1	0.00177241	0.265845	0.923	0.787	1	3	Prosbeta1
CR31451	0.00182228	0.36689	0.981	0.96	1	3	CR31451
CG316761	0.00190918	0.393812	0.5	0.296	1	3	CG31676
CG14853	0.00193506	0.27534	0.423	0.239	1	3	CG14853
Prosalpha5	0.00208806	0.256813	0.808	0.698	1	3	Prosalpha5
rad1	0.00231653	0.520246	0.865	0.751	1	3	rad
CG1416	0.00289994	0.279753	0.808	0.601	1	3	CG1416
ND-39	0.00395041	0.253434	0.885	0.834	1	3	ND-39
spidey	0.00401739	0.264488	0.904	0.841	1	3	spidey
Fas2	0.00410524	0.727692	0.654	0.621	1	3	Fas2
capt	0.00513482	0.296573	0.769	0.701	1	3	capt
CG9119	0.00514369	0.30535	0.404	0.236	1	3	CG9119
cpb	0.00555437	0.254148	0.519	0.359	1	3	cpb
CG8243	0.00624649	0.26591	0.577	0.412	1	3	CG8243
CG134081	0.00642094	0.260638	0.385	0.229	1	3	CG13408
HmgZ	0.00747914	0.30121	1	0.997	1	3	HmgZ
Pde61	0.00758682	0.272613	0.981	0.894	1	3	Pde6
CG13055	0.00807467	0.275514	0.885	0.777	1	3	CG13055
CG43658	0.00834495	0.867103	0.673	0.621	1	3	CG43658
ImpL2	1.85653e-34	1.39516	0.524	0.006	2.58671e-30	4	ImpL2
Tk	9.245e-24	1.60786	0.714	0.063	1.28811e-19	4	Tk
DIP-epsilon	5.98233e-19	0.738216	0.667	0.069	8.33518e-15	4	DIP-epsilon
CG43155	7.14363e-18	0.626309	0.571	0.051	9.95322e-14	4	CG43155
CG4766	1.8374e-17	0.906721	0.81	0.136	2.56005e-13	4	CG4766
B-H1	3.17434e-16	0.69047	0.619	0.075	4.42281e-12	4	B-H1
mab-21	4.4481e-16	0.991062	0.81	0.142	6.19753e-12	4	mab-21
vvl1	1.0098e-15	1.56368	1	0.325	1.40696e-11	4	vvl
vn	1.4183e-14	0.89698	0.857	0.202	1.97612e-10	4	vn
CG177161	4.48236e-14	1.61956	1	0.861	6.24527e-10	4	CG17716
CG4297	4.66033e-14	1.37352	0.905	0.31	6.49323e-10	4	CG4297
AstC-R2	8.63919e-14	1.47307	1	0.419	1.2037e-09	4	AstC-R2
jim2	2.00907e-13	1.34368	1	0.997	2.79923e-09	4	jim
tup1	1.4035e-12	0.697911	0.81	0.178	1.95549e-08	4	tup
eys	1.49047e-12	1.40534	1	0.666	2.07668e-08	4	eys
CG14298	2.62079e-12	0.549569	0.524	0.066	3.65155e-08	4	CG14298
pyd1	3.75533e-12	0.944301	1	0.476	5.2323e-08	4	pyd
Pvf31	4.18068e-12	1.36547	1	0.711	5.82494e-08	4	Pvf3
crb1	1.10751e-11	0.815289	0.714	0.169	1.54309e-07	4	crb
CG3655	1.23722e-11	1.07367	1	0.602	1.72381e-07	4	CG3655
CG42673	2.26413e-11	1.10503	0.857	0.361	3.15461e-07	4	CG42673
br1	4.24802e-11	1.05925	1	0.352	5.91877e-07	4	br
rk	6.06198e-11	0.431002	0.571	0.096	8.44615e-07	4	rk
Dat	7.78345e-11	1.24371	1	0.509	1.08447e-06	4	Dat
Ca-alpha1T	5.03396e-10	0.995819	1	0.729	7.01382e-06	4	Ca-alpha1T
sv1	5.27654e-10	0.704704	0.714	0.166	7.3518e-06	4	sv
spab	1.04869e-09	1.35563	0.762	0.283	1.46114e-05	4	spab
Drl-21	1.14251e-09	0.840061	1	0.458	1.59186e-05	4	Drl-2
ed	1.69431e-09	0.855631	1	0.765	2.36068e-05	4	ed
igl	2.15611e-09	0.754162	1	0.967	3.00411e-05	4	igl
dpr10	3.32061e-09	0.797	0.857	0.392	4.62661e-05	4	dpr10
CG42340	5.54643e-09	0.780193	1	0.759	7.72784e-05	4	CG42340
CG321371	6.43217e-09	0.445047	0.667	0.184	8.96194e-05	4	CG32137
beat-Ic1	9.09291e-09	0.969839	0.952	0.66	0.000126691	4	beat-Ic
CG436581	9.1287e-09	0.701469	1	0.605	0.00012719	4	CG43658
cv-2	1.41815e-08	1.02781	0.905	0.398	0.000197592	4	cv-2
fred	4.17509e-08	0.784483	1	0.828	0.000581716	4	fred
CG9008	7.72868e-08	0.459501	0.714	0.211	0.00107684	4	CG9008
skl	9.19855e-08	0.496072	0.81	0.295	0.00128163	4	skl
Ppcs	9.6324e-08	0.691816	0.952	0.566	0.00134208	4	Ppcs
Pka-R2	1.04729e-07	0.543853	1	0.925	0.00145918	4	Pka-R2
CG44325	1.67831e-07	0.569731	0.476	0.102	0.00233839	4	CG44325
spg	2.8597e-07	0.67344	0.762	0.346	0.00398442	4	spg
ST6Gal1	2.99455e-07	0.710971	0.81	0.349	0.00417231	4	ST6Gal
CG327001	3.11244e-07	0.646581	1	0.599	0.00433656	4	CG32700
CG325321	3.24226e-07	0.518784	0.667	0.19	0.00451745	4	CG32532
rpr	5.64741e-07	0.470799	0.81	0.304	0.00786853	4	rpr
CR46003	6.7229e-07	0.407431	0.619	0.184	0.00936702	4	CR46003
dpr131	7.30249e-07	0.66879	0.952	0.611	0.0101746	4	dpr13
CG1688	7.85402e-07	0.476381	0.952	0.452	0.010943	4	CG1688
GABA-B-R3	1.33116e-06	0.587164	0.81	0.319	0.0185471	4	GABA-B-R3
CG31760	3.06147e-06	0.449672	0.667	0.247	0.0426555	4	CG31760
nkd	3.80435e-06	0.593349	1	0.786	0.053006	4	nkd
kune	3.85932e-06	0.657628	0.762	0.377	0.0537719	4	kune
CG13337	3.9681e-06	0.296371	0.429	0.102	0.0552875	4	CG13337
CG326981	4.04897e-06	0.414927	0.857	0.37	0.0564142	4	CG32698
Tis11	4.3196e-06	0.378211	0.381	0.084	0.060185	4	Tis11
fz	5.08071e-06	0.518389	1	0.78	0.0707896	4	fz
CG125941	5.14722e-06	0.746086	0.952	0.566	0.0717163	4	CG12594
Wdr62	6.21626e-06	0.54196	0.952	0.837	0.0866112	4	Wdr62
dpr15	1.02837e-05	0.491189	0.762	0.331	0.143282	4	dpr15
CG10512	1.03379e-05	0.541688	0.619	0.247	0.144038	4	CG10512
Oct-TyrR1	1.45317e-05	0.950394	0.905	0.524	0.20247	4	Oct-TyrR
CG437291	1.6983e-05	0.505008	1	0.94	0.236624	4	CG43729
DIP-delta1	1.75718e-05	0.589998	1	0.608	0.244827	4	DIP-delta
ctp	1.94509e-05	0.260443	1	1	0.27101	4	ctp
CG42817	1.98474e-05	0.579449	0.952	0.705	0.276534	4	CG42817
Ggamma30A	2.01349e-05	0.434888	1	0.985	0.280539	4	Ggamma30A
trn1	2.02182e-05	0.623543	0.905	0.596	0.2817	4	trn
eIF4EHP	2.41888e-05	0.446459	1	0.925	0.337022	4	eIF4EHP
GluClalpha	2.47229e-05	0.39436	1	0.949	0.344464	4	GluClalpha
CG69591	2.50353e-05	0.557339	0.762	0.401	0.348817	4	CG6959
CG13300	2.53897e-05	0.324206	0.81	0.41	0.353755	4	CG13300
sick1	2.94052e-05	0.544905	0.81	0.458	0.409703	4	sick
Cngl1	2.97354e-05	0.530228	1	0.813	0.414303	4	Cngl
dpr20	4.01035e-05	0.458781	0.81	0.349	0.558762	4	dpr20
CG9896	4.13172e-05	0.304519	0.381	0.102	0.575673	4	CG9896
Syx1A	4.45392e-05	0.307691	1	0.988	0.620564	4	Syx1A
CG43740	4.50915e-05	0.576672	0.667	0.34	0.628259	4	CG43740
pros1	4.62568e-05	0.616874	1	0.813	0.644496	4	pros
CG18208	5.62421e-05	0.496008	1	0.837	0.783621	4	CG18208
drongo	5.66692e-05	0.330646	0.667	0.31	0.789572	4	drongo
blp	5.81306e-05	0.266954	0.524	0.181	0.809934	4	blp
CG34351	5.96472e-05	0.416545	0.571	0.226	0.831065	4	CG34351
kek21	6.97602e-05	0.589704	0.952	0.786	0.971969	4	kek2
mspo	7.01612e-05	0.459825	0.905	0.636	0.977557	4	mspo
X11Lbeta1	8.89311e-05	0.587446	0.905	0.729	1	4	X11Lbeta
Octbeta2R1	9.26964e-05	0.510453	0.952	0.735	1	4	Octbeta2R
dnc	9.67954e-05	0.363699	1	0.973	1	4	dnc
CG65831	0.000108753	0.255237	0.571	0.217	1	4	CG6583
CG8861	0.000114771	0.597333	0.905	0.533	1	4	CG8861
beat-Ia1	0.0001222	0.498711	1	0.681	1	4	beat-Ia
CG42389	0.000144778	0.365421	1	0.864	1	4	CG42389
CrzR	0.000152876	0.336972	0.381	0.111	1	4	CrzR
Rab26	0.000175356	0.436157	0.905	0.726	1	4	Rab26
CG3277	0.000185999	0.329462	0.381	0.114	1	4	CG3277
Mid1	0.000214023	0.471322	0.952	0.843	1	4	Mid1
CG43902	0.000242412	0.498779	0.905	0.566	1	4	CG43902
jvl	0.000258439	0.318135	1	0.741	1	4	jvl
Drgx1	0.000263332	0.357943	0.476	0.169	1	4	Drgx
Tsp42Ej	0.000282776	0.357328	1	0.97	1	4	Tsp42Ej
CG14903	0.000289542	0.314164	0.714	0.386	1	4	CG14903
dati2	0.000319371	0.529715	0.952	0.654	1	4	dati
beat-Ib1	0.000323523	0.430013	1	0.657	1	4	beat-Ib
CG8301	0.00032965	0.443117	0.714	0.41	1	4	CG8301
CG341141	0.000338383	0.41293	0.952	0.623	1	4	CG34114
dpr8	0.000394372	0.492068	0.952	0.883	1	4	dpr8
DIP-theta1	0.000405975	0.472526	0.905	0.467	1	4	DIP-theta
CG5694	0.000442083	0.311294	0.857	0.521	1	4	CG5694
CG117681	0.000464034	0.386251	0.714	0.319	1	4	CG11768
Lmpt1	0.000495036	0.331934	0.857	0.44	1	4	Lmpt
nolo1	0.000518393	0.677414	0.81	0.702	1	4	nolo
CG1542	0.000530744	0.277491	0.524	0.232	1	4	CG1542
CG11695	0.000568843	0.262951	0.333	0.102	1	4	CG11695
IA-2	0.000692339	0.314458	1	0.949	1	4	IA-2
msi1	0.000729142	0.360069	1	0.94	1	4	msi
galectin	0.000752682	0.4609	0.619	0.377	1	4	galectin
CG428061	0.000775416	0.51753	0.667	0.389	1	4	CG42806
Teh1	0.00101334	0.357135	0.952	0.783	1	4	Teh1
pyr	0.00108802	0.323946	0.571	0.286	1	4	pyr
rdgA1	0.00111845	0.373336	0.952	0.759	1	4	rdgA
CG42788	0.00127148	0.352197	0.571	0.31	1	4	CG42788
disp	0.00169316	0.289421	0.571	0.277	1	4	disp
CG335431	0.00171034	0.300314	1	0.768	1	4	CG33543
pdm32	0.00178655	0.409977	0.857	0.506	1	4	pdm3
Oamb	0.0018386	0.254973	0.524	0.235	1	4	Oamb
CG12253	0.00193828	0.2665	0.429	0.178	1	4	CG12253
CG18368	0.00194838	0.363011	0.381	0.154	1	4	CG18368
CG34383	0.00216759	0.391896	0.857	0.648	1	4	CG34383
Dl	0.00225951	0.27927	0.333	0.114	1	4	Dl
CG32428	0.00232824	0.374383	0.81	0.536	1	4	CG32428
rn1	0.00234743	0.451613	0.476	0.211	1	4	rn
grp	0.00245715	0.283858	1	0.801	1	4	grp
smog	0.00250049	0.341622	0.857	0.642	1	4	smog
row	0.00255382	0.260175	0.476	0.229	1	4	row
kirre1	0.00265192	0.348795	1	0.861	1	4	kirre
Dh31-R	0.00272188	0.318276	0.381	0.145	1	4	Dh31-R
chinmo1	0.00281916	0.370277	0.952	0.958	1	4	chinmo
pgant21	0.00306354	0.274419	0.81	0.563	1	4	pgant2
Sdc1	0.00307398	0.254086	1	0.976	1	4	Sdc
CG5641	0.00318814	0.326343	0.762	0.56	1	4	CG5641
Uhg2	0.0034482	0.298999	0.476	0.229	1	4	Uhg2
CG84601	0.00360146	0.367812	0.762	0.518	1	4	CG8460
CG329821	0.00374758	0.377055	0.714	0.449	1	4	CG32982
Rgk1	0.0037727	0.290047	0.905	0.795	1	4	Rgk1
rept	0.00377723	0.253489	0.333	0.127	1	4	rept
CG31038	0.00393766	0.2685	0.476	0.232	1	4	CG31038
Hmt-1	0.00433313	0.2697	0.381	0.163	1	4	Hmt-1
GluRIB1	0.00521554	0.281664	0.952	0.78	1	4	GluRIB
olf413	0.00567856	0.375412	0.857	0.768	1	4	olf413
CG7115	0.00611252	0.389219	0.667	0.482	1	4	CG7115
CG33143	0.00620259	0.284936	0.857	0.78	1	4	CG33143
CASK	0.0062292	0.274518	0.952	0.952	1	4	CASK
CG11436	0.00626129	0.289959	0.476	0.271	1	4	CG11436
CG152361	0.00649017	0.479766	0.905	0.738	1	4	CG15236
Cow	0.00653508	0.261381	1	0.88	1	4	Cow
Blos1	0.00656654	0.307147	0.762	0.584	1	4	Blos1
CG5045	0.00662838	0.277404	0.714	0.551	1	4	CG5045
CG12541	0.00670989	0.262125	0.571	0.322	1	4	CG12541
CG148641	0.00680218	0.258371	0.381	0.169	1	4	CG14864
pr	0.00806942	0.314281	0.333	0.142	1	4	pr
CG110302	0.00825784	0.388479	0.952	0.789	1	4	CG11030
CG34136	0.00945556	0.294969	0.857	0.633	1	4	CG34136

## Sheet: 2.KCSubclustering
	p_val	avg_logFC	pct.1	pct.2	p_val_adj	cluster	gene
jdp	1.01336e-130	0.769399	1	0.853	1.41192e-126	0	jdp
14-3-3zeta	1.60298e-104	0.591552	1	0.999	2.23343e-100	0	14-3-3zeta
Dop1R1	1.44655e-96	0.810779	0.979	0.734	2.01548e-92	0	Dop1R1
ab	9.89056e-93	0.77337	0.998	0.733	1.37805e-88	0	ab
dysc	1.21106e-92	0.543899	0.998	0.982	1.68737e-88	0	dysc
GFP	1.40008e-92	0.811714	0.965	0.903	1.95073e-88	0	GFP
Pka-R2	6.47538e-92	0.702498	1	0.898	9.02214e-88	0	Pka-R2
Glut4EF	7.21061e-84	0.663836	0.994	0.88	1.00465e-79	0	Glut4EF
Rgk3	5.90912e-82	0.810657	0.933	0.575	8.23318e-78	0	Rgk3
Pka-C3	3.62361e-78	0.766193	0.958	0.465	5.04877e-74	0	Pka-C3
Toll-7	4.88223e-78	0.84548	0.858	0.476	6.80242e-74	0	Toll-7
Nlg3	1.862e-77	0.520121	0.994	0.958	2.59433e-73	0	Nlg3
Gfrl	2.02409e-76	0.574954	0.992	0.901	2.82016e-72	0	Gfrl
dnc	3.54658e-76	0.521199	0.994	0.965	4.94145e-72	0	dnc
Pkc53E	1.31171e-75	0.64686	0.99	0.799	1.82761e-71	0	Pkc53E
CG17778	5.53451e-75	0.845622	0.925	0.643	7.71124e-71	0	CG17778
Cngl	2.21531e-74	0.466364	0.998	0.962	3.08659e-70	0	Cngl
CG32700	3.21429e-74	0.656564	0.992	0.695	4.47848e-70	0	CG32700
rut	4.56885e-73	0.668811	0.99	0.724	6.36578e-69	0	rut
olf413	1.93944e-69	0.648122	0.979	0.724	2.70223e-65	0	olf413
CG32647	4.59513e-69	0.761288	0.871	0.538	6.40239e-65	0	CG32647
CG42260	3.79988e-65	0.595749	0.975	0.841	5.29437e-61	0	CG42260
Pka-C1	1.71726e-64	0.560406	1	0.953	2.39265e-60	0	Pka-C1
Fas2	3.90848e-64	0.487073	1	0.878	5.44569e-60	0	Fas2
Rgk1	3.50606e-63	0.57561	0.971	0.813	4.88499e-59	0	Rgk1
Hr38	8.61518e-63	0.749237	0.923	0.642	1.20035e-58	0	Hr38
mub	1.87289e-61	0.47765	1	0.981	2.6095e-57	0	mub
Rim	3.01837e-61	0.507005	0.99	0.931	4.2055e-57	0	Rim
Ubi-p5E	4.77759e-59	0.40454	1	0.983	6.65662e-55	0	Ubi-p5E
sNPF	1.34951e-56	0.599571	0.944	0.589	1.88028e-52	0	sNPF
CG10947	1.88033e-53	0.704463	0.764	0.383	2.61986e-49	0	CG10947
CG31140	1.94555e-53	0.507439	0.96	0.844	2.71074e-49	0	CG31140
CG11835	2.71771e-53	0.67561	0.593	0.197	3.78659e-49	0	CG11835
cv-c	1.54047e-52	0.641163	0.752	0.347	2.14634e-48	0	cv-c
CanB	2.90623e-52	0.415486	0.996	0.963	4.04925e-48	0	CanB
Octbeta1R	1.76937e-51	0.640565	0.829	0.464	2.46526e-47	0	Octbeta1R
cora	2.12199e-51	0.627352	0.871	0.604	2.95657e-47	0	cora
DopEcR	2.30255e-51	0.498518	0.958	0.888	3.20814e-47	0	DopEcR
Appl	4.20461e-51	0.388324	0.998	0.977	5.85829e-47	0	Appl
CG45263	1.01395e-49	0.431848	0.99	0.864	1.41274e-45	0	CG45263
GluRIB	3.49709e-49	0.466429	0.979	0.843	4.87249e-45	0	GluRIB
prt	6.2436e-49	0.644382	0.791	0.399	8.69921e-45	0	prt
w	3.6144e-48	0.652762	0.866	0.613	5.03595e-44	0	w
CG42541	1.19833e-47	0.399704	0.994	0.96	1.66964e-43	0	CG42541
CG34402	1.51933e-47	0.492182	0.975	0.538	2.11689e-43	0	CG34402
Bx	7.4592e-47	0.519326	0.958	0.654	1.03929e-42	0	Bx
amon	2.03835e-46	0.563634	0.871	0.63	2.84003e-42	0	amon
Pka-R1	2.97571e-45	0.523265	0.939	0.735	4.14605e-41	0	Pka-R1
CG43324	2.2185e-43	0.449585	1	0.88	3.09104e-39	0	CG43324
HDAC4	5.61492e-39	0.527304	0.787	0.575	7.82327e-35	0	HDAC4
Imp	1.09303e-38	0.486508	0.925	0.576	1.52292e-34	0	Imp
dpr8	3.92027e-38	0.390834	0.973	0.883	5.46211e-34	0	dpr8
Rbp	1.00526e-36	0.422275	0.937	0.859	1.40062e-32	0	Rbp
brp	8.68685e-36	0.362003	0.985	0.948	1.21034e-31	0	brp
CG10738	3.03988e-35	0.588099	0.42	0.144	4.23547e-31	0	CG10738
rad	1.92487e-34	0.374739	1	0.92	2.68193e-30	0	rad
CG10019	1.41717e-33	0.549757	0.658	0.406	1.97454e-29	0	CG10019
CG13954	2.6988e-33	0.596312	0.597	0.332	3.76023e-29	0	CG13954
Sh	4.57898e-33	0.261707	1	0.995	6.37989e-29	0	Sh
Pde1c	3.30913e-32	0.407373	0.889	0.735	4.6106e-28	0	Pde1c
norpA	3.39921e-32	0.513383	0.772	0.558	4.73613e-28	0	norpA
puc	1.16516e-31	0.574112	0.672	0.43	1.62342e-27	0	puc
sdt	1.62032e-31	0.364017	0.952	0.897	2.2576e-27	0	sdt
Mef2	8.78242e-30	0.408101	0.902	0.609	1.22365e-25	0	Mef2
dpr12	1.13823e-29	0.36846	0.925	0.812	1.58589e-25	0	dpr12
rdgA	1.53683e-29	0.423215	0.787	0.492	2.14127e-25	0	rdgA
scyl	3.17006e-29	0.357738	0.969	0.885	4.41684e-25	0	scyl
bma	1.06467e-28	0.500405	0.731	0.493	1.4834e-24	0	bma
ctp	4.01908e-28	0.261174	1	0.975	5.59978e-24	0	ctp
bru3	4.42278e-28	0.297922	0.998	0.951	6.16226e-24	0	bru3
Pkc98E	4.71565e-28	0.398311	0.883	0.782	6.57031e-24	0	Pkc98E
Rab27	5.19901e-28	0.573224	0.47	0.219	7.24378e-24	0	Rab27
scrib	1.13995e-27	0.477881	0.674	0.427	1.58828e-23	0	scrib
NaCP60E	2.68999e-27	0.344455	0.935	0.87	3.74797e-23	0	NaCP60E
Shawl	6.11331e-27	0.469297	0.687	0.453	8.51768e-23	0	Shawl
CG30158	7.13283e-27	0.445647	0.704	0.431	9.93817e-23	0	CG30158
dac	9.15195e-27	0.457838	0.662	0.356	1.27514e-22	0	dac
MRE16	9.58682e-27	0.27028	1	0.986	1.33573e-22	0	MRE16
sty	1.03232e-26	0.44764	0.71	0.483	1.43832e-22	0	sty
pAbp	1.54996e-26	0.283143	0.985	0.95	2.15956e-22	0	pAbp
CG5830	2.07709e-25	0.564127	0.568	0.339	2.89401e-21	0	CG5830
bun	3.48364e-25	0.316474	0.96	0.922	4.85375e-21	0	bun
CG42313	4.54042e-25	0.329571	0.906	0.722	6.32616e-21	0	CG42313
tow	1.0728e-24	0.443905	0.779	0.644	1.49474e-20	0	tow
cact	1.18848e-24	0.500817	0.643	0.445	1.65591e-20	0	cact
CG31997	1.40531e-24	0.416173	0.779	0.491	1.95802e-20	0	CG31997
kek1	2.90563e-24	0.322194	0.967	0.854	4.04841e-20	0	kek1
2mit	3.12143e-24	0.479442	0.587	0.374	4.34908e-20	0	2mit
danr	4.53762e-24	0.444396	0.434	0.2	6.32226e-20	0	danr
nAChRalpha6	5.20592e-24	0.290461	0.952	0.893	7.25341e-20	0	nAChRalpha6
Dop2R	1.46928e-23	0.331683	0.908	0.731	2.04715e-19	0	Dop2R
CG32506	3.04519e-23	0.418094	0.689	0.48	4.24287e-19	0	CG32506
CG34114	3.09962e-23	0.319541	0.931	0.847	4.3187e-19	0	CG34114
dpr10	3.23001e-23	0.420751	0.754	0.559	4.50038e-19	0	dpr10
CycG	5.97518e-23	0.309281	0.958	0.912	8.32522e-19	0	CycG
toy	1.2818e-22	0.340094	0.877	0.621	1.78594e-18	0	toy
Tob	2.2082e-22	0.398338	0.8	0.629	3.07669e-18	0	Tob
Drep2	2.50197e-22	0.295839	0.927	0.903	3.486e-18	0	Drep2
Tomosyn	5.71637e-22	0.30395	0.9	0.769	7.96462e-18	0	Tomosyn
Pde9	1.69385e-21	0.322927	0.944	0.855	2.36004e-17	0	Pde9
fok	1.87219e-21	0.414031	0.768	0.631	2.60852e-17	0	fok
wdb	3.25189e-21	0.295436	0.925	0.885	4.53086e-17	0	wdb
eys	1.2094e-20	0.31388	0.887	0.748	1.68506e-16	0	eys
NFAT	2.03134e-20	0.390244	0.622	0.425	2.83027e-16	0	NFAT
aPKC	3.2159e-20	0.40132	0.664	0.502	4.48072e-16	0	aPKC
Calx	3.74245e-20	0.330608	0.86	0.734	5.21435e-16	0	Calx
CG42402	6.73965e-20	0.25691	0.985	0.905	9.39035e-16	0	CG42402
CG11221	6.86756e-20	0.460731	0.478	0.264	9.56857e-16	0	CG11221
mspo	7.36441e-20	0.292666	0.925	0.827	1.02608e-15	0	mspo
ed	7.5441e-20	0.370639	0.695	0.481	1.05112e-15	0	ed
Unc-76	8.74802e-20	0.372097	0.758	0.64	1.21886e-15	0	Unc-76
Hr51	1.295e-19	0.416638	0.572	0.346	1.80433e-15	0	Hr51
CG30116	2.43946e-19	0.355849	0.816	0.683	3.3989e-15	0	CG30116
Ac78C	6.70663e-19	0.380746	0.595	0.36	9.34435e-15	0	Ac78C
GluRIA	3.14934e-18	0.306378	0.825	0.674	4.38798e-14	0	GluRIA
Frq1	3.71207e-18	0.283282	0.931	0.805	5.17202e-14	0	Frq1
kek3	5.75869e-18	0.371943	0.63	0.435	8.02358e-14	0	kek3
Rdh	5.81362e-18	0.343382	0.739	0.631	8.10012e-14	0	Rdh
Elk	7.78611e-18	0.400689	0.434	0.234	1.08484e-13	0	Elk
mtd	9.21154e-18	0.39681	0.662	0.508	1.28344e-13	0	mtd
a	1.02548e-17	0.372875	0.286	0.117	1.4288e-13	0	a
CG8910	1.13669e-17	0.425692	0.564	0.383	1.58374e-13	0	CG8910
CG10543	1.40665e-17	0.289287	0.793	0.687	1.95989e-13	0	CG10543
shi	1.50406e-17	0.259367	0.962	0.919	2.09561e-13	0	shi
CG42750	2.31112e-17	0.278159	0.804	0.659	3.22008e-13	0	CG42750
fend	4.28002e-17	0.269661	0.9	0.824	5.96335e-13	0	fend
VAChT	4.83305e-17	0.34564	0.764	0.599	6.73389e-13	0	VAChT
Syt1	7.83082e-17	0.250504	0.956	0.921	1.09107e-12	0	Syt1
rdgB	8.42681e-17	0.446202	0.53	0.372	1.17411e-12	0	rdgB
Ric	1.31692e-16	0.307281	0.871	0.783	1.83487e-12	0	Ric
RapGAP1	1.33776e-16	0.322394	0.831	0.718	1.8639e-12	0	RapGAP1
wry	1.46276e-16	0.308152	0.804	0.647	2.03807e-12	0	wry
neur	2.59129e-16	0.4107	0.33	0.156	3.61045e-12	0	neur
gprs	3.41302e-16	0.382449	0.524	0.35	4.75536e-12	0	gprs
CG32066	3.95383e-16	0.371266	0.641	0.487	5.50887e-12	0	CG32066
Dif	7.42204e-16	0.372063	0.415	0.223	1.03411e-11	0	Dif
larp	8.81135e-16	0.326028	0.716	0.584	1.22769e-11	0	larp
DOR	2.06708e-15	0.328367	0.745	0.646	2.88006e-11	0	DOR
dpr9	2.12526e-15	0.2747	0.873	0.763	2.96113e-11	0	dpr9
SPR	2.68619e-15	0.364518	0.566	0.387	3.74267e-11	0	SPR
Nep1	4.54938e-15	0.328239	0.438	0.236	6.33865e-11	0	Nep1
Dop1R2	7.8429e-15	0.265784	0.783	0.641	1.09275e-10	0	Dop1R2
stx	9.20407e-15	0.370625	0.626	0.498	1.2824e-10	0	stx
Slob	2.00639e-14	0.276941	0.783	0.648	2.7955e-10	0	Slob
CG31760	2.25911e-14	0.40342	0.34	0.183	3.14762e-10	0	CG31760
UbcE2H	2.98823e-14	0.415023	0.426	0.28	4.16351e-10	0	UbcE2H
SRPK	4.37967e-14	0.372665	0.62	0.495	6.10219e-10	0	SRPK
svr	7.45216e-14	0.297575	0.706	0.603	1.03831e-09	0	svr
CG33993	7.82862e-14	0.337401	0.386	0.209	1.09076e-09	0	CG33993
trio	9.76875e-14	0.337135	0.612	0.472	1.36108e-09	0	trio
ey	1.19974e-13	0.296574	0.697	0.531	1.6716e-09	0	ey
CG31191	3.04045e-13	0.270311	0.641	0.434	4.23626e-09	0	CG31191
CG32758	4.13717e-13	0.411967	0.476	0.348	5.76432e-09	0	CG32758
CG11537	1.03326e-12	0.350013	0.428	0.281	1.43964e-08	0	CG11537
mGluR	1.76821e-12	0.298763	0.614	0.45	2.46365e-08	0	mGluR
CR43651	2.43841e-11	0.303659	0.296	0.16	3.39743e-07	0	CR43651
Rgl	2.93603e-11	0.342585	0.509	0.376	4.09077e-07	0	Rgl
Dmtn	2.94677e-11	0.310266	0.543	0.409	4.10573e-07	0	Dmtn
comm	2.98128e-11	0.309199	0.461	0.313	4.15382e-07	0	comm
pHCl-1	4.13642e-11	0.288879	0.539	0.392	5.76327e-07	0	pHCl-1
numb	5.60645e-11	0.361638	0.526	0.416	7.81146e-07	0	numb
CG9813	1.1287e-10	0.288819	0.564	0.435	1.57262e-06	0	CG9813
CG12531	1.59055e-10	0.286119	0.572	0.47	2.21612e-06	0	CG12531
CG34370	1.60602e-10	0.335715	0.374	0.247	2.23766e-06	0	CG34370
CG14669	1.73639e-10	0.334964	0.507	0.388	2.41931e-06	0	CG14669
CG13921	2.48941e-10	0.300725	0.493	0.361	3.46849e-06	0	CG13921
CG14442	3.78321e-10	0.337346	0.532	0.433	5.27115e-06	0	CG14442
Cip4	5.63727e-10	0.305859	0.568	0.467	7.85441e-06	0	Cip4
bru1	6.50989e-10	0.275828	0.528	0.376	9.07023e-06	0	bru1
Ktl	7.31034e-10	0.288101	0.608	0.505	1.01855e-05	0	Ktl
phyl	5.20133e-09	0.276153	0.593	0.494	7.24701e-05	0	phyl
CG32486	8.31624e-09	0.271107	0.555	0.47	0.00011587	0	CG32486
Sirt1	9.59004e-09	0.268105	0.614	0.531	0.000133618	0	Sirt1
RSG7	1.13052e-08	0.269858	0.641	0.576	0.000157516	0	RSG7
sick	4.47095e-08	0.271613	0.443	0.328	0.000622937	0	sick
Gycbeta100B	4.63664e-08	0.310338	0.376	0.267	0.000646023	0	Gycbeta100B
CG15309	7.86509e-08	0.289587	0.459	0.373	0.00109584	0	CG15309
btsz	8.36518e-08	0.311086	0.351	0.246	0.00116552	0	btsz
CG7985	1.26626e-07	0.295227	0.434	0.338	0.00176429	0	CG7985
CG13055	1.38078e-07	0.296047	0.595	0.521	0.00192384	0	CG13055
CG12194	2.52836e-07	0.263077	0.436	0.336	0.00352276	0	CG12194
CG16711	3.50952e-07	0.271249	0.566	0.52	0.00488982	0	CG16711
fest	4.2067e-07	0.271904	0.251	0.154	0.00586119	0	fest
CG10132	4.73208e-07	0.288751	0.424	0.338	0.00659321	0	CG10132
beat-IV	7.3511e-07	0.269519	0.353	0.251	0.0102423	0	beat-IV
Frq2	9.32598e-07	0.268717	0.564	0.486	0.0129939	0	Frq2
CG30389	9.46842e-07	0.2566	0.489	0.414	0.0131924	0	CG30389
eag	1.08986e-06	0.262993	0.547	0.462	0.015185	0	eag
CG14024	1.11293e-06	0.260283	0.497	0.416	0.0155064	0	CG14024
Lrch	1.226e-06	0.265475	0.451	0.377	0.0170819	0	Lrch
CycT	1.3439e-06	0.295481	0.455	0.377	0.0187246	0	CycT
CG3530	1.45965e-06	0.279952	0.355	0.269	0.0203373	0	CG3530
CG12769	2.80156e-06	0.283162	0.255	0.169	0.0390341	0	CG12769
wts	2.87919e-06	0.253827	0.359	0.266	0.0401157	0	wts
mim	1.24483e-05	0.25624	0.424	0.353	0.173442	0	mim
CG42788	1.33511e-05	0.259601	0.43	0.35	0.18602	0	CG42788
CG34357	3.3089e-05	0.257643	0.344	0.278	0.461029	0	CG34357
Trpm	4.20091e-05	0.274928	0.357	0.286	0.585313	0	Trpm
Hsp67Bc	2.65245e-57	0.551076	0.99	0.999	3.69566e-53	1	Hsp67Bc
CG344021	2.46595e-36	0.776166	0.929	0.633	3.4358e-32	1	CG34402
ab1	2.99288e-34	0.643667	0.98	0.789	4.16998e-30	1	ab
14-3-3zeta1	1.04343e-33	0.446455	1	0.999	1.45381e-29	1	14-3-3zeta
CG433241	7.05036e-27	0.477964	0.99	0.906	9.82327e-23	1	CG43324
jdp1	2.33504e-26	0.474205	0.995	0.883	3.25341e-22	1	jdp
Eip75B	2.13385e-25	0.761667	0.717	0.436	2.97309e-21	1	Eip75B
CG32204	2.13967e-23	0.693992	0.768	0.499	2.98121e-19	1	CG32204
sNPF1	6.70859e-22	0.542728	0.904	0.666	9.34707e-18	1	sNPF
Pka-C11	2.58588e-20	0.420745	0.99	0.964	3.60291e-16	1	Pka-C1
PH4alphaNE1	4.56999e-19	0.715635	0.424	0.169	6.36737e-15	1	PH4alphaNE1
Pka-C31	3.55551e-18	0.51883	0.869	0.578	4.95389e-14	1	Pka-C3
CG424021	6.97678e-18	0.428331	0.965	0.924	9.72075e-14	1	CG42402
olf4131	4.09159e-17	0.444442	0.914	0.785	5.70082e-13	1	olf413
Pka-R21	3.38012e-16	0.404607	0.985	0.921	4.70952e-12	1	Pka-R2
CG118351	9.33928e-16	0.628768	0.545	0.284	1.30124e-11	1	CG11835
Pdcd4	3.29744e-15	0.436075	0.864	0.852	4.59433e-11	1	Pdcd4
Mef21	2.75236e-14	0.430886	0.848	0.676	3.83486e-10	1	Mef2
Cpr65Ea	6.63924e-14	0.637764	0.5	0.268	9.25045e-10	1	Cpr65Ea
metro	6.26038e-13	0.619885	0.525	0.342	8.72258e-09	1	metro
rad1	1.26359e-12	0.350194	0.995	0.937	1.76056e-08	1	rad
mts	2.41643e-12	0.407276	0.874	0.862	3.36681e-08	1	mts
Atg8a	3.08871e-12	0.314162	0.914	0.914	4.3035e-08	1	Atg8a
Hsc70-4	5.87266e-12	0.370988	0.884	0.878	8.18238e-08	1	Hsc70-4
mspo1	1.94153e-11	0.37267	0.879	0.854	2.70513e-07	1	mspo
CG15628	2.42083e-10	0.545496	0.601	0.457	3.37295e-06	1	CG15628
CG7646	4.92965e-10	0.264088	0.934	0.954	6.86848e-06	1	CG7646
Imp1	1.83027e-09	0.339752	0.874	0.654	2.55012e-05	1	Imp
dpr21	1.93102e-09	0.37739	0.843	0.818	2.69049e-05	1	dpr21
CG13920	1.08509e-08	0.358591	0.879	0.884	0.000151186	1	CG13920
RabX4	1.09471e-08	0.517411	0.53	0.424	0.000152526	1	RabX4
ringer	1.78577e-08	0.251093	0.894	0.963	0.000248812	1	ringer
CG109471	2.55811e-08	0.35534	0.652	0.476	0.000356421	1	CG10947
Mapmodulin	4.06039e-08	0.377633	0.667	0.554	0.000565734	1	Mapmodulin
cora1	5.02595e-08	0.357169	0.788	0.67	0.000700266	1	cora
mub1	1.18106e-07	0.266885	0.985	0.987	0.00164557	1	mub
CR45312	2.61004e-07	0.563414	0.414	0.279	0.00363656	1	CR45312
CG1943	6.55835e-07	0.258576	0.864	0.901	0.00913775	1	CG1943
w1	1.56433e-06	0.288888	0.768	0.679	0.0217957	1	w
CkIalpha	1.63709e-06	0.293532	0.778	0.779	0.0228095	1	CkIalpha
Fas21	1.96779e-06	0.276774	0.949	0.91	0.0274172	1	Fas2
CG319971	3.90038e-06	0.343732	0.702	0.561	0.0543441	1	CG31997
Pka-R11	4.47437e-06	0.268993	0.833	0.792	0.0623414	1	Pka-R1
veli	5.02194e-06	0.360943	0.667	0.622	0.0699707	1	veli
5PtaseI	6.09306e-06	0.376377	0.49	0.38	0.0848946	1	5PtaseI
nAChRalpha2	7.40445e-06	0.352782	0.561	0.468	0.103166	1	nAChRalpha2
CG301581	8.17985e-06	0.338653	0.596	0.501	0.11397	1	CG30158
Vha14-1	1.16533e-05	0.29354	0.783	0.781	0.162365	1	Vha14-1
CG8498	1.1851e-05	0.295115	0.763	0.696	0.16512	1	CG8498
Tomosyn1	1.4657e-05	0.314992	0.813	0.808	0.204215	1	Tomosyn
ghi	1.83182e-05	0.344533	0.419	0.307	0.255228	1	ghi
Mob4	1.83962e-05	0.417382	0.621	0.555	0.256314	1	Mob4
akirin	2.29606e-05	0.320804	0.626	0.554	0.31991	1	akirin
CG2269	5.37759e-05	0.254255	0.742	0.824	0.74926	1	CG2269
Gycalpha99B	6.93188e-05	0.339202	0.591	0.542	0.965819	1	Gycalpha99B
TfIIS	0.000112608	0.385789	0.404	0.32	1	1	TfIIS
Cdk5alpha	0.000115738	0.314487	0.626	0.562	1	1	Cdk5alpha
thoc7	0.000119761	0.359272	0.414	0.318	1	1	thoc7
Nep11	0.000155152	0.333723	0.404	0.282	1	1	Nep1
Cyt-c-p	0.000183644	0.259141	0.859	0.903	1	1	Cyt-c-p
neur1	0.000190258	0.336454	0.303	0.195	1	1	neur
GstD11	0.000195242	0.299689	0.323	0.21	1	1	GstD11
Unc-761	0.00020514	0.278356	0.677	0.676	1	1	Unc-76
CR44030	0.000225541	0.343819	0.263	0.169	1	1	CR44030
CG79851	0.000236885	0.267595	0.449	0.355	1	1	CG7985
rdgBbeta	0.000242357	0.395035	0.298	0.202	1	1	rdgBbeta
Lis-1	0.00027771	0.350527	0.677	0.672	1	1	Lis-1
PVRAP	0.000301442	0.31882	0.586	0.512	1	1	PVRAP
SLC22A	0.000347706	0.270958	0.263	0.166	1	1	SLC22A
Lamp1	0.000478446	0.296129	0.702	0.725	1	1	Lamp1
CG3726	0.00065025	0.321125	0.475	0.376	1	1	CG3726
CG9368	0.000660685	0.33389	0.672	0.63	1	1	CG9368
Task7	0.000838752	0.360377	0.369	0.29	1	1	Task7
B52	0.00122352	0.260987	0.722	0.741	1	1	B52
ey1	0.00144756	0.257227	0.636	0.573	1	1	ey
Pitslre	0.00169764	0.335014	0.667	0.676	1	1	Pitslre
SC35	0.00182321	0.297659	0.525	0.48	1	1	SC35
Pp1-87B	0.00194901	0.252899	0.672	0.654	1	1	Pp1-87B
Oamb	0.00195407	0.291348	0.318	0.235	1	1	Oamb
HP1c	0.00232925	0.275485	0.323	0.251	1	1	HP1c
Gpb5	0.00247974	0.326272	0.369	0.307	1	1	Gpb5
CG6767	0.00270293	0.299628	0.561	0.533	1	1	CG6767
CG15097	0.00301949	0.308552	0.288	0.21	1	1	CG15097
l(1)G0469	0.0033593	0.290832	0.328	0.258	1	1	l(1)G0469
CG8149	0.00340137	0.340873	0.293	0.223	1	1	CG8149
Psc	0.00399041	0.390315	0.384	0.326	1	1	Psc
Rpt1	0.00417379	0.324645	0.409	0.353	1	1	Rpt1
mRpL48	0.00421278	0.366299	0.298	0.236	1	1	mRpL48
CG98131	0.00440224	0.334026	0.5	0.47	1	1	CG9813
AIMP3	0.00450765	0.306037	0.444	0.403	1	1	AIMP3
jigr1	0.00483038	0.290218	0.338	0.271	1	1	jigr1
CG5174	0.00491286	0.330789	0.47	0.44	1	1	CG5174
CG325061	0.0062555	0.307969	0.566	0.54	1	1	CG32506
gus	0.00946995	0.259036	0.591	0.596	1	1	gus
GstD1	5.16968e-130	1.75309	0.849	0.128	7.20291e-126	2	GstD1
mamo	3.41653e-98	1.7644	1	0.636	4.76025e-94	2	mamo
Con	1.24918e-63	1.11805	0.909	0.434	1.74049e-59	2	Con
CG6154	6.67227e-63	1.09623	0.575	0.12	9.29647e-59	2	CG6154
CG13739	1.83143e-54	0.981	0.952	0.64	2.55173e-50	2	CG13739
nAChRalpha7	5.82827e-49	0.801221	0.968	0.796	8.12052e-45	2	nAChRalpha7
CG43658	1.12251e-47	0.659322	0.968	0.53	1.56399e-43	2	CG43658
CG31221	4.52862e-45	0.717432	0.995	0.758	6.30973e-41	2	CG31221
trv	1.17522e-41	0.706619	0.978	0.728	1.63743e-37	2	trv
igl	8.62451e-41	0.75634	0.925	0.635	1.20165e-36	2	igl
CG15765	1.04327e-37	0.751515	0.876	0.522	1.45359e-33	2	CG15765
Fife	7.12706e-35	0.788353	0.898	0.616	9.93014e-31	2	Fife
nAChRalpha5	3.77574e-33	0.426072	0.995	0.99	5.26074e-29	2	nAChRalpha5
pros	1.63306e-30	0.256233	0.995	0.9	2.27534e-26	2	pros
Ten-a	3.10068e-26	0.352218	1	0.991	4.32018e-22	2	Ten-a
kek11	2.06354e-25	0.47925	0.968	0.877	2.87513e-21	2	kek1
GstD111	2.53697e-25	0.778556	0.5	0.188	3.53476e-21	2	GstD11
rgn	1.95871e-22	0.667039	0.452	0.175	2.72907e-18	2	rgn
kuz	2.5361e-21	0.461709	0.903	0.744	3.53355e-17	2	kuz
coro	2.95764e-21	0.710383	0.398	0.149	4.12088e-17	2	coro
eEF1alpha2	1.714e-20	0.314893	0.995	0.989	2.38812e-16	2	eEF1alpha2
hdc	2.62286e-20	0.605109	0.78	0.536	3.65443e-16	2	hdc
CG32698	2.93884e-20	0.262114	0.548	0.211	4.09468e-16	2	CG32698
pyd	1.28423e-19	0.585329	0.661	0.406	1.78932e-15	2	pyd
CLIP-190	3.27701e-19	0.557973	0.844	0.749	4.56586e-15	2	CLIP-190
path	4.08784e-19	0.587945	0.538	0.28	5.69559e-15	2	path
Nep12	6.88103e-19	0.568883	0.548	0.264	9.58734e-15	2	Nep1
SK	7.43762e-19	0.536421	0.866	0.757	1.03628e-14	2	SK
5-HT1A	1.04209e-18	0.430089	0.71	0.356	1.45194e-14	2	5-HT1A
klg	2.15926e-18	0.302413	0.855	0.578	3.00849e-14	2	klg
lbm	3.75592e-18	0.600227	0.414	0.171	5.23313e-14	2	lbm
heph	4.84339e-18	0.394345	0.919	0.799	6.7483e-14	2	heph
zfh2	8.22427e-18	0.621621	0.543	0.261	1.14589e-13	2	zfh2
kek31	2.16792e-17	0.552269	0.71	0.465	3.02056e-13	2	kek3
GluRIB1	4.61909e-17	0.37478	0.968	0.873	6.43578e-13	2	GluRIB
tna	7.90849e-17	0.391099	0.962	0.926	1.10189e-12	2	tna
fz	9.49343e-17	0.4566	0.892	0.767	1.32272e-12	2	fz
Sema1a	1.06587e-16	0.321097	0.989	0.967	1.48508e-12	2	Sema1a
CG311911	3.27275e-16	0.541076	0.694	0.47	4.55992e-12	2	CG31191
CG11319	6.88615e-16	0.543931	0.634	0.433	9.59448e-12	2	CG11319
dlg1	1.33378e-15	0.304063	0.978	0.966	1.85836e-11	2	dlg1
hppy	1.46988e-15	0.600517	0.392	0.183	2.04799e-11	2	hppy
jeb	1.85881e-15	0.51684	0.79	0.631	2.58988e-11	2	jeb
Mef22	9.8045e-15	0.410279	0.898	0.671	1.36606e-10	2	Mef2
Pkc53E1	9.9368e-15	0.362188	0.984	0.84	1.38449e-10	2	Pkc53E
Fas3	1.17004e-14	0.542884	0.586	0.357	1.63021e-10	2	Fas3
CG327001	3.8011e-14	0.379014	0.995	0.756	5.29608e-10	2	CG32700
MYPT-75D	7.26282e-14	0.438186	0.661	0.431	1.01193e-09	2	MYPT-75D
CG422601	7.47017e-14	0.36203	0.914	0.877	1.04082e-09	2	CG42260
CG14509	9.99053e-14	0.308413	0.968	0.926	1.39198e-09	2	CG14509
rdx	1.1751e-13	0.490507	0.737	0.595	1.63727e-09	2	rdx
Df31	2.2196e-13	0.264763	0.995	0.976	3.09256e-09	2	Df31
HmgZ	3.3575e-13	0.285713	0.989	0.976	4.67801e-09	2	HmgZ
Tet	4.71368e-13	0.31917	0.93	0.783	6.56757e-09	2	Tet
GABA-B-R1	5.08281e-13	0.423941	0.737	0.63	7.08188e-09	2	GABA-B-R1
Bx1	2.11788e-12	0.350582	0.925	0.722	2.95084e-08	2	Bx
Slob1	5.39924e-12	0.393035	0.801	0.674	7.52277e-08	2	Slob
CG42342	1.02908e-11	0.389308	0.731	0.569	1.43382e-07	2	CG42342
CG5890	1.62564e-11	0.381739	0.769	0.646	2.265e-07	2	CG5890
CG11768	3.27619e-11	0.478982	0.511	0.323	4.56472e-07	2	CG11768
Cow	8.30562e-11	0.388144	0.758	0.607	1.15722e-06	2	Cow
CG319972	1.39341e-10	0.323994	0.785	0.551	1.94144e-06	2	CG31997
Dhit	5.01887e-10	0.254383	0.962	0.969	6.99279e-06	2	Dhit
rdgC	5.07221e-10	0.4633	0.371	0.197	7.06711e-06	2	rdgC
sca	8.28708e-10	0.453386	0.543	0.376	1.15464e-05	2	sca
Imp2	9.02802e-10	0.344392	0.86	0.658	1.25787e-05	2	Imp
CG344022	1.16367e-09	0.305478	0.952	0.633	1.62134e-05	2	CG34402
CG15312	2.05712e-09	0.532456	0.355	0.204	2.86619e-05	2	CG15312
CG42238	2.21348e-09	0.445138	0.473	0.314	3.08404e-05	2	CG42238
Eip93F	2.86923e-09	0.292057	0.737	0.529	3.9977e-05	2	Eip93F
Dop2R1	3.1129e-09	0.294167	0.86	0.774	4.33721e-05	2	Dop2R
CG34354	3.12775e-09	0.406644	0.559	0.373	4.3579e-05	2	CG34354
dpr81	5.38023e-09	0.277803	0.93	0.908	7.49628e-05	2	dpr8
Tomosyn2	6.94308e-09	0.32703	0.849	0.803	9.67379e-05	2	Tomosyn
GluRIA1	7.97597e-09	0.310475	0.796	0.709	0.000111129	2	GluRIA
Eip78C	8.21564e-09	0.338904	0.769	0.684	0.000114468	2	Eip78C
CG1504	8.40128e-09	0.391192	0.344	0.183	0.000117055	2	CG1504
ckn	1.29469e-08	0.397661	0.629	0.523	0.000180389	2	ckn
CG17272	1.70766e-08	0.331366	0.667	0.575	0.000237928	2	CG17272
CG105431	1.71948e-08	0.333709	0.758	0.714	0.000239575	2	CG10543
Pka-R12	1.87213e-08	0.265105	0.903	0.783	0.000260844	2	Pka-R1
CG18812	1.93834e-08	0.421005	0.72	0.666	0.000270068	2	CG18812
Ank2	2.13941e-08	0.270262	0.903	0.892	0.000298083	2	Ank2
Magi	3.04407e-08	0.389028	0.398	0.241	0.00042413	2	Magi
sdt1	4.2343e-08	0.258876	0.93	0.911	0.000589965	2	sdt
CG301161	7.16409e-08	0.304398	0.79	0.714	0.000998172	2	CG30116
toy1	1.02541e-07	0.303492	0.839	0.68	0.0014287	2	toy
CG423131	1.34702e-07	0.290812	0.887	0.763	0.00187681	2	CG42313
CG17124	2.1788e-07	0.274702	0.866	0.827	0.00303572	2	CG17124
CG33543	2.33186e-07	0.267841	0.699	0.571	0.00324898	2	CG33543
trio1	2.58912e-07	0.355076	0.613	0.501	0.00360742	2	trio
l(3)neo38	2.97029e-07	0.408134	0.478	0.351	0.0041385	2	l(3)neo38
Ac78C1	3.26385e-07	0.370995	0.554	0.414	0.00454752	2	Ac78C
NK7.1	3.27912e-07	0.323244	0.527	0.376	0.00456879	2	NK7.1
CG433242	3.33865e-07	0.251579	1	0.905	0.00465174	2	CG43324
Cip41	4.02164e-07	0.348537	0.591	0.485	0.00560335	2	Cip4
didum	4.07314e-07	0.342938	0.296	0.166	0.00567511	2	didum
CG89101	4.6189e-07	0.356277	0.548	0.423	0.00643551	2	CG8910
mgl	5.10141e-07	0.337278	0.565	0.445	0.0071078	2	mgl
CG14431	6.33571e-07	0.338236	0.29	0.159	0.00882754	2	CG14431
drl	8.41948e-07	0.46823	0.376	0.259	0.0117309	2	drl
CG5151	8.43478e-07	0.402318	0.613	0.543	0.0117522	2	CG5151
CG14535	8.79353e-07	0.431971	0.414	0.292	0.012252	2	CG14535
wry1	1.12867e-06	0.284099	0.774	0.684	0.0157257	2	wry
Elk1	1.26452e-06	0.379852	0.419	0.278	0.0176186	2	Elk
CG30463	2.59307e-06	0.260601	0.71	0.576	0.0361293	2	CG30463
CG4297	3.3329e-06	0.400774	0.392	0.265	0.0464372	2	CG4297
CG6959	4.8229e-06	0.292519	0.527	0.404	0.0671975	2	CG6959
Smox	6.01317e-06	0.311123	0.586	0.505	0.0837814	2	Smox
sima	6.35651e-06	0.334405	0.634	0.577	0.0885653	2	sima
dac1	6.37889e-06	0.264466	0.591	0.429	0.0888771	2	dac
CG112211	9.00211e-06	0.304491	0.457	0.311	0.125426	2	CG11221
Flo1	9.00259e-06	0.29588	0.597	0.525	0.125433	2	Flo1
CG301582	9.10713e-06	0.309244	0.613	0.5	0.12689	2	CG30158
CG42324	9.14453e-06	0.367653	0.484	0.381	0.127411	2	CG42324
CG14762	1.09234e-05	0.293871	0.651	0.575	0.152196	2	CG14762
Pep	1.11208e-05	0.287379	0.72	0.668	0.154945	2	Pep
CG322041	1.25114e-05	0.301035	0.629	0.52	0.174321	2	CG32204
Cyt-b5	1.50517e-05	0.27415	0.64	0.577	0.209716	2	Cyt-b5
CG6700	1.90452e-05	0.257119	0.699	0.639	0.265356	2	CG6700
CG11658	2.07987e-05	0.418768	0.274	0.172	0.289789	2	CG11658
CG34355	3.40186e-05	0.287996	0.306	0.194	0.473981	2	CG34355
tral	3.51373e-05	0.302815	0.575	0.531	0.489568	2	tral
Shab	5.19467e-05	0.26272	0.634	0.574	0.723774	2	Shab
Tl	5.31488e-05	0.319477	0.371	0.261	0.740523	2	Tl
CG30015	6.07415e-05	0.335471	0.328	0.231	0.846311	2	CG30015
Rab35	8.41242e-05	0.299939	0.591	0.567	1	2	Rab35
Dif1	9.90504e-05	0.272789	0.387	0.267	1	2	Dif
CG32432	0.000108045	0.325756	0.452	0.36	1	2	CG32432
Pli	0.00012539	0.427525	0.409	0.336	1	2	Pli
pcs	0.000138969	0.319491	0.505	0.451	1	2	pcs
Xrp1	0.000186548	0.389502	0.43	0.35	1	2	Xrp1
CG17075	0.000208378	0.304096	0.328	0.236	1	2	CG17075
mGluR1	0.000241434	0.290916	0.581	0.489	1	2	mGluR
NFAT1	0.0002726	0.255647	0.538	0.478	1	2	NFAT
CG1648	0.000362103	0.432399	0.258	0.175	1	2	CG1648
btsz1	0.000411937	0.274684	0.36	0.266	1	2	btsz
Dat	0.000436075	0.269427	0.333	0.236	1	2	Dat
CG42389	0.000463769	0.262978	0.559	0.509	1	2	CG42389
CG67671	0.00049243	0.255117	0.565	0.533	1	2	CG6767
Svil	0.000538477	0.370523	0.344	0.257	1	2	Svil
CG3967	0.000557909	0.27423	0.522	0.486	1	2	CG3967
Pp1-87B1	0.000613109	0.273541	0.661	0.656	1	2	Pp1-87B
gogo	0.0012484	0.283015	0.312	0.235	1	2	gogo
kek6	0.00126422	0.295355	0.398	0.341	1	2	kek6
Mi-2	0.00172833	0.291304	0.452	0.421	1	2	Mi-2
unc-13-4A	0.00194863	0.251708	0.371	0.293	1	2	unc-13-4A
fwe	0.00252453	0.287585	0.5	0.473	1	2	fwe
CG7834	0.00344415	0.251769	0.269	0.202	1	2	CG7834
unc-5	0.0041929	0.297798	0.263	0.201	1	2	unc-5
CG320661	0.00606997	0.283498	0.532	0.534	1	2	CG32066
vg	0	2.54621	0.98	0.006	0	3	vg
tey	0	1.95781	0.928	0.002	0	3	tey
disco	5.19136e-288	1.92285	0.948	0.013	7.23312e-284	3	disco
Wnt10	1.36827e-270	1.77347	0.804	0.001	1.90641e-266	3	Wnt10
Gad1	3.40165e-258	1.62794	0.85	0.01	4.73952e-254	3	Gad1
disco-r	1.96025e-252	1.41988	0.791	0.005	2.73122e-248	3	disco-r
bi	3.38022e-219	1.61121	0.935	0.04	4.70966e-215	3	bi
zfh1	2.80103e-214	1.26328	0.66	0.002	3.90267e-210	3	zfh1
bnl	4.94202e-206	1.48271	0.745	0.017	6.88572e-202	3	bnl
hig	5.23815e-187	1.8117	0.954	0.08	7.29832e-183	3	hig
CR45141	1.43054e-186	0.925354	0.582	0.002	1.99317e-182	3	CR45141
CG34155	5.61832e-178	2.37383	0.948	0.084	7.828e-174	3	CG34155
CG14989	6.40114e-171	4.9435	1	0.142	8.91871e-167	3	CG14989
bab2	8.70903e-157	1.33037	0.771	0.053	1.21343e-152	3	bab2
Scp2	1.30319e-156	2.46429	0.654	0.027	1.81573e-152	3	Scp2
beat-IIa	2.60572e-153	1.69938	0.928	0.108	3.63055e-149	3	beat-IIa
DIP-theta	2.07737e-152	1.49731	0.83	0.07	2.89439e-148	3	DIP-theta
RYa-R	1.21612e-151	0.984423	0.556	0.011	1.69442e-147	3	RYa-R
CG17716	3.45815e-143	2.14948	0.993	0.167	4.81825e-139	3	CG17716
CG32521	1.44859e-141	1.34938	0.85	0.089	2.01832e-137	3	CG32521
fred	1.28827e-137	1.63064	0.967	0.137	1.79494e-133	3	fred
Tsp42Eg	3.15784e-131	1.36162	0.438	0.004	4.39981e-127	3	Tsp42Eg
CG18599	2.10395e-126	0.593986	0.392	0.001	2.93143e-122	3	CG18599
CG15522	6.60639e-124	1.53703	0.902	0.14	9.20469e-120	3	CG15522
CG326981	4.91369e-123	2.11849	0.922	0.179	6.84624e-119	3	CG32698
ninaC	6.88312e-109	0.65034	0.34	0.001	9.59025e-105	3	ninaC
DIP-beta	1.91508e-108	0.996517	0.549	0.034	2.66829e-104	3	DIP-beta
CG31814	2.32418e-104	1.12426	0.712	0.076	3.23828e-100	3	CG31814
dati	1.0829e-102	1.32108	0.908	0.174	1.50881e-98	3	dati
CG44153	2.79049e-99	1.2328	0.928	0.172	3.88799e-95	3	CG44153
bab1	3.98132e-98	0.688581	0.405	0.013	5.54718e-94	3	bab1
msi	2.46732e-92	1.33716	0.948	0.24	3.43772e-88	3	msi
Pde6	1.43717e-91	1.84867	0.993	0.346	2.00242e-87	3	Pde6
CG45781	1.49234e-89	0.851084	0.484	0.032	2.07929e-85	3	CG45781
CG14257	2.2034e-89	0.442848	0.294	0.002	3.07e-85	3	CG14257
Hs3st-B	2.23563e-88	1.13892	0.765	0.137	3.1149e-84	3	Hs3st-B
Lac	5.69704e-88	0.907362	0.562	0.051	7.93769e-84	3	Lac
Fili	1.36574e-85	0.930849	0.621	0.07	1.90289e-81	3	Fili
dpr18	2.22858e-85	0.80616	0.575	0.061	3.10508e-81	3	dpr18
Lmx1a	2.3294e-83	0.492933	0.255	0	3.24556e-79	3	Lmx1a
Neto	1.1853e-81	0.82057	0.621	0.075	1.65148e-77	3	Neto
NPFR	1.53404e-81	0.694955	0.412	0.024	2.13737e-77	3	NPFR
nolo	2.02272e-78	1.04822	0.739	0.13	2.81825e-74	3	nolo
kek2	1.47501e-76	1.10666	0.928	0.233	2.05513e-72	3	kek2
VGAT	3.94846e-76	0.770087	0.614	0.08	5.50139e-72	3	VGAT
CG30172	1.70451e-75	1.24973	1	0.768	2.37489e-71	3	CG30172
Dscam3	6.20543e-74	0.956716	0.824	0.178	8.64602e-70	3	Dscam3
CG11030	7.06423e-74	0.860738	0.719	0.122	9.84259e-70	3	CG11030
CG15236	2.02752e-72	1.00089	0.804	0.175	2.82494e-68	3	CG15236
beat-IIb	4.97774e-72	0.742799	0.575	0.075	6.93548e-68	3	beat-IIb
Cad87A	6.10793e-71	0.690678	0.588	0.08	8.51019e-67	3	Cad87A
GstZ2	1.26611e-70	1.09578	0.804	0.188	1.76407e-66	3	GstZ2
Pdfr	1.88504e-69	0.556327	0.379	0.026	2.62642e-65	3	Pdfr
CG3655	1.96262e-69	0.988772	0.869	0.218	2.73452e-65	3	CG3655
Adk1	3.71788e-69	0.854992	0.51	0.061	5.18012e-65	3	Adk1
shakB	4.02537e-69	1.01891	1	0.936	5.60855e-65	3	shakB
CG18549	7.53417e-69	0.48064	0.34	0.018	1.04974e-64	3	CG18549
Tsp66E	3.36212e-68	1.06314	0.954	0.272	4.68445e-64	3	Tsp66E
Nplp1	6.72589e-68	0.759035	0.523	0.066	9.37119e-64	3	Nplp1
app	6.51889e-67	0.881511	0.621	0.101	9.08277e-63	3	app
5-HT1A1	2.56831e-66	1.20801	0.948	0.339	3.57843e-62	3	5-HT1A
Mp	4.94746e-65	0.985964	0.993	0.821	6.8933e-61	3	Mp
Tdc2	3.00365e-63	0.729916	0.261	0.008	4.18499e-59	3	Tdc2
CG12730	5.78739e-63	0.452553	0.314	0.017	8.06357e-59	3	CG12730
Octbeta3R	9.56063e-61	0.971599	0.843	0.243	1.33208e-56	3	Octbeta3R
wake	1.02505e-59	0.59753	0.386	0.036	1.42821e-55	3	wake
Rbp6	2.0909e-59	0.842149	1	0.924	2.91325e-55	3	Rbp6
sli	2.38213e-59	0.760643	0.516	0.079	3.31902e-55	3	sli
Teh1	9.56456e-59	0.849899	0.85	0.228	1.33263e-54	3	Teh1
side	4.89577e-57	0.768936	0.752	0.162	6.82128e-53	3	side
kug	1.42184e-56	0.768299	0.699	0.148	1.98105e-52	3	kug
Corin	2.90804e-55	1.01161	0.791	0.232	4.05177e-51	3	Corin
Ddc	3.86274e-55	0.707817	0.706	0.151	5.38195e-51	3	Ddc
beat-Ib	2.71581e-54	0.726203	0.752	0.174	3.78393e-50	3	beat-Ib
CG13937	5.72676e-54	0.840478	0.745	0.189	7.97909e-50	3	CG13937
5-HT7	6.11512e-54	0.576419	0.373	0.038	8.5202e-50	3	5-HT7
Ca-alpha1T	1.15382e-53	0.90118	0.804	0.227	1.60761e-49	3	Ca-alpha1T
CG42594	2.06387e-53	0.712561	0.634	0.124	2.8756e-49	3	CG42594
Eno	3.94676e-53	0.954744	0.967	0.452	5.49902e-49	3	Eno
sno	4.97524e-53	0.989442	0.967	0.507	6.93201e-49	3	sno
ST6Gal	9.6472e-53	0.580922	0.399	0.047	1.34414e-48	3	ST6Gal
bnb	5.21723e-51	0.578548	0.32	0.028	7.26917e-47	3	bnb
GABA-B-R3	3.58446e-50	0.536762	0.333	0.033	4.99423e-46	3	GABA-B-R3
slgA	5.32961e-50	0.864861	0.961	0.579	7.42575e-46	3	slgA
dpr2	5.80526e-50	0.712075	0.641	0.14	8.08847e-46	3	dpr2
CG43795	1.92878e-49	0.536845	0.444	0.064	2.68736e-45	3	CG43795
CG9932	2.01228e-49	0.926715	0.712	0.191	2.80372e-45	3	CG9932
CG12484	2.01585e-49	0.551546	0.451	0.068	2.80868e-45	3	CG12484
CG15041	7.40078e-49	0.658288	0.673	0.151	1.03115e-44	3	CG1504
CG8861	3.20279e-48	0.962655	0.889	0.346	4.46244e-44	3	CG8861
CG17193	3.89444e-48	0.414021	0.281	0.022	5.42613e-44	3	CG17193
CR45332	4.34675e-48	0.627778	0.458	0.073	6.05632e-44	3	CR45332
CG10283	9.39005e-48	0.508636	0.34	0.036	1.30831e-43	3	CG10283
CG12994	2.16846e-47	0.794597	0.523	0.097	3.02132e-43	3	CG12994
CG44838	9.85875e-47	0.936105	0.843	0.336	1.37362e-42	3	CG44838
CG9119	2.31492e-46	0.614477	0.32	0.032	3.22537e-42	3	CG9119
fne	5.24e-46	0.7065	1	0.982	7.30089e-42	3	fne
Dscam2	5.57934e-46	0.754737	0.993	0.881	7.7737e-42	3	Dscam2
dpr16	1.5995e-45	0.511011	0.294	0.027	2.22859e-41	3	dpr16
sm	2.80831e-45	0.995767	0.987	0.828	3.91282e-41	3	sm
Rbp9	5.4791e-45	0.84809	0.967	0.646	7.63403e-41	3	Rbp9
sns	8.3762e-45	0.685557	0.497	0.097	1.16706e-40	3	sns
LRP1	9.33589e-45	0.676059	0.621	0.148	1.30077e-40	3	LRP1
AstA-R1	1.08536e-44	0.50904	0.288	0.026	1.51222e-40	3	AstA-R1
Cbp53E	2.8548e-44	0.432563	0.739	0.202	3.97759e-40	3	Cbp53E
Pvf3	3.05924e-44	0.722668	0.837	0.264	4.26244e-40	3	Pvf3
CG42613	2.00873e-43	0.784266	0.961	0.579	2.79876e-39	3	CG42613
CG43759	2.69324e-43	0.608722	0.667	0.165	3.75249e-39	3	CG43759
ASPP	1.03992e-42	0.482795	0.275	0.024	1.44892e-38	3	ASPP
CG10804	2.52415e-42	0.770715	0.81	0.288	3.5169e-38	3	CG10804
fru	2.84006e-42	1.42811	1	0.9	3.95705e-38	3	fru
CR31451	4.14532e-42	1.09446	0.98	0.9	5.77567e-38	3	CR31451
beat-Ic	8.50723e-42	0.273393	0.739	0.183	1.18531e-37	3	beat-Ic
CG31475	1.04425e-41	0.669983	0.542	0.121	1.45496e-37	3	CG31475
GluClalpha	1.75903e-41	0.776427	0.987	0.755	2.45086e-37	3	GluClalpha
Liprin-gamma	3.88085e-39	0.79749	0.941	0.539	5.40718e-35	3	Liprin-gamma
AstC-R1	1.65581e-38	0.527198	0.451	0.084	2.30704e-34	3	AstC-R1
dpr3	2.13483e-38	0.483786	0.516	0.108	2.97445e-34	3	dpr3
VhaAC45	1.07553e-37	0.546378	0.556	0.137	1.49854e-33	3	VhaAC45
Ppa	5.80369e-37	0.548348	0.542	0.126	8.08628e-33	3	Ppa
CG4629	9.64807e-37	0.571037	0.464	0.1	1.34427e-32	3	CG4629
Sik2	1.40985e-36	0.66973	0.647	0.191	1.96434e-32	3	Sik2
Sdc	3.2821e-36	0.588254	1	0.922	4.57295e-32	3	Sdc
CG12913	3.61868e-36	0.366798	0.346	0.051	5.0419e-32	3	CG12913
CG1265	1.56098e-35	0.558413	0.569	0.149	2.17491e-31	3	CG1265
pgant2	2.43588e-35	0.769466	0.922	0.504	3.39391e-31	3	pgant2
IA-2	2.97054e-35	0.692183	0.98	0.639	4.13885e-31	3	IA-2
DIP-delta	4.68283e-35	0.6266	0.451	0.093	6.52458e-31	3	DIP-delta
pxb	6.30486e-35	0.694781	0.386	0.073	8.78456e-31	3	pxb
CG13108	6.86402e-35	0.739425	0.863	0.418	9.56364e-31	3	CG13108
sano	1.10572e-34	0.710433	0.431	0.092	1.5406e-30	3	sano
CG34371	1.36045e-34	0.618724	0.647	0.191	1.89552e-30	3	CG34371
Msp300	2.33631e-34	0.728769	0.961	0.617	3.25518e-30	3	Msp300
Mmp2	5.25146e-34	0.589286	0.529	0.135	7.31686e-30	3	Mmp2
simj	1.23788e-33	0.678344	0.85	0.348	1.72474e-29	3	simj
dpr6	1.36202e-33	0.658601	0.771	0.274	1.8977e-29	3	dpr6
Ssadh	1.6284e-33	0.557017	0.497	0.117	2.26885e-29	3	Ssadh
AstC-R2	1.63661e-33	0.626578	0.575	0.157	2.28029e-29	3	AstC-R2
Sec61beta	2.47274e-33	0.650315	0.935	0.491	3.44527e-29	3	Sec61beta
gce	1.24123e-32	0.653694	0.778	0.299	1.72941e-28	3	gce
CG3961	1.77539e-32	0.560113	0.529	0.139	2.47365e-28	3	CG3961
GLS	2.03549e-32	0.476828	0.438	0.098	2.83604e-28	3	GLS
CG5196	2.58369e-32	0.598262	0.438	0.097	3.59986e-28	3	CG5196
nkd	2.79269e-32	0.570789	0.712	0.232	3.89105e-28	3	nkd
CanB2	3.99004e-32	0.713355	0.922	0.491	5.55933e-28	3	CanB2
eEF1alpha1	4.9531e-32	0.652775	0.752	0.269	6.90115e-28	3	eEF1alpha1
klg1	1.11087e-31	1.03465	0.941	0.575	1.54778e-27	3	klg
CG14015	1.4209e-31	0.615731	0.673	0.224	1.97975e-27	3	CG14015
CG32850	1.45444e-31	0.81298	0.719	0.265	2.02647e-27	3	CG32850
rdo	1.82061e-31	0.689276	0.529	0.154	2.53665e-27	3	rdo
Ptp99A	2.54248e-31	0.638657	0.967	0.731	3.54244e-27	3	Ptp99A
Gadd45	5.35183e-31	0.438205	0.32	0.053	7.4567e-27	3	Gadd45
Wnt4	1.19381e-30	0.39345	0.294	0.045	1.66333e-26	3	Wnt4
CadN2	1.35897e-30	0.541225	0.379	0.08	1.89346e-26	3	CadN2
Ih	1.59032e-30	0.790764	0.993	0.783	2.21579e-26	3	Ih
FMRFaR	2.23474e-30	0.29966	0.294	0.045	3.11366e-26	3	FMRFaR
CR43283	2.3643e-30	0.388616	0.307	0.05	3.29418e-26	3	CR43283
CG31145	3.22252e-30	0.402529	0.32	0.058	4.48993e-26	3	CG31145
LTV1	4.12026e-30	0.596842	0.673	0.239	5.74076e-26	3	LTV1
Dat1	8.61678e-30	0.649585	0.641	0.205	1.20058e-25	3	Dat
5-HT2A	1.02175e-29	0.503746	0.392	0.085	1.42361e-25	3	5-HT2A
dUTPase	1.03928e-29	0.537176	0.373	0.08	1.44802e-25	3	dUTPase
Mlc-c	1.29173e-29	0.609371	0.588	0.188	1.79977e-25	3	Mlc-c
ome	1.86513e-29	0.533618	0.536	0.144	2.59868e-25	3	ome
His4r	2.33103e-29	0.266266	1	0.997	3.24783e-25	3	His4r
Fife1	3.22163e-29	0.712058	0.967	0.615	4.4887e-25	3	Fife
QIL1	4.39898e-29	0.616467	0.81	0.345	6.12909e-25	3	QIL1
CadN	6.01838e-29	0.587411	0.954	0.529	8.38541e-25	3	CadN
CG157651	8.10746e-29	0.808771	0.889	0.529	1.12961e-24	3	CG15765
jim	8.79908e-29	0.509476	0.993	0.874	1.22598e-24	3	jim
CCKLR-17D3	1.05871e-28	0.655281	0.784	0.355	1.47509e-24	3	CCKLR-17D3
CG42492	1.20038e-28	0.43465	0.993	0.952	1.67249e-24	3	CG42492
mei-P26	2.32054e-28	0.557022	0.993	0.856	3.23321e-24	3	mei-P26
CG4101	3.50353e-28	0.601847	0.837	0.402	4.88147e-24	3	CG4101
ps	4.31044e-28	0.430098	0.993	0.95	6.00573e-24	3	ps
CG43737	6.08429e-27	0.57545	0.961	0.65	8.47725e-23	3	CG43737
Frq11	7.03512e-27	0.56115	0.993	0.827	9.80203e-23	3	Frq1
CG12594	1.07573e-26	0.904063	0.686	0.301	1.49881e-22	3	CG12594
Eaat2	1.88341e-26	0.50776	0.614	0.204	2.62416e-22	3	Eaat2
Kdm4A	2.96788e-26	0.351853	0.34	0.07	4.13515e-22	3	Kdm4A
cv-2	7.45585e-26	0.43897	0.484	0.131	1.03882e-21	3	cv-2
bol	1.03578e-25	0.563061	0.961	0.62	1.44315e-21	3	bol
shep	1.1989e-25	0.457576	0.987	0.97	1.67043e-21	3	shep
eIF4E1	2.95332e-25	0.51309	0.961	0.592	4.11487e-21	3	eIF4E1
Trp1	5.60957e-25	0.577065	0.908	0.521	7.81581e-21	3	Trp1
Tctp	6.15637e-25	0.363464	1	0.972	8.57767e-21	3	Tctp
rho	7.4296e-25	0.436397	0.425	0.11	1.03517e-20	3	rho
RpL18A	9.49577e-25	0.336553	1	0.976	1.32305e-20	3	RpL18A
Fas31	1.01351e-24	0.557971	0.804	0.339	1.41212e-20	3	Fas3
CG14715	1.02499e-24	0.430705	0.464	0.133	1.42811e-20	3	CG14715
trn	1.51756e-24	0.463049	0.595	0.196	2.11442e-20	3	trn
Sap47	1.61825e-24	0.39209	0.98	0.923	2.2547e-20	3	Sap47
miple1	2.81441e-24	0.360386	1	0.983	3.92132e-20	3	miple1
qtc	3.45414e-24	0.49283	0.654	0.239	4.81266e-20	3	qtc
tsr	3.48181e-24	0.705961	0.908	0.588	4.8512e-20	3	tsr
Tet1	4.01211e-24	0.512699	1	0.779	5.59008e-20	3	Tet
CG43740	4.52315e-24	0.579465	0.608	0.231	6.30211e-20	3	CG43740
sta	5.48854e-24	0.327775	1	0.988	7.64718e-20	3	sta
su(w[a])	1.02655e-23	0.500592	0.634	0.23	1.43029e-19	3	su(w[a])
CG42265	1.58805e-23	0.551017	0.856	0.448	2.21263e-19	3	CG42265
CG343541	1.66778e-23	0.551911	0.791	0.352	2.32372e-19	3	CG34354
CG17270	1.67645e-23	0.569568	0.784	0.4	2.3358e-19	3	CG17270
Fie	1.73758e-23	0.458834	0.477	0.145	2.42097e-19	3	Fie
Ac13E	2.46328e-23	0.464402	0.32	0.071	3.43209e-19	3	Ac13E
Invadolysin	5.75473e-23	0.432529	0.536	0.178	8.01807e-19	3	Invadolysin
Prp3	7.93413e-23	0.308498	0.346	0.079	1.10546e-18	3	Prp3
CG4364	1.07612e-22	0.369869	0.412	0.113	1.49935e-18	3	CG4364
CG423421	1.27309e-22	0.712608	0.824	0.562	1.7738e-18	3	CG42342
RpL37a	1.788e-22	0.300811	1	0.995	2.49121e-18	3	RpL37a
lbm1	1.87555e-22	0.643021	0.51	0.167	2.61321e-18	3	lbm
Ald	2.13109e-22	0.409113	0.614	0.215	2.96925e-18	3	Ald
Fur1	2.38376e-22	0.505833	0.752	0.322	3.32129e-18	3	Fur1
Efa6	2.39503e-22	0.391476	0.471	0.144	3.33699e-18	3	Efa6
CG10960	2.98552e-22	0.314979	0.386	0.1	4.15972e-18	3	CG10960
CR44024	3.1356e-22	0.484469	0.588	0.202	4.36883e-18	3	CR44024
RpL6	3.92106e-22	0.301057	1	0.98	5.46321e-18	3	RpL6
2021-09-01	5.04441e-22	0.489475	0.556	0.198	7.02838e-18	3	2021-09-01
eIF3l	5.11369e-22	0.537571	0.941	0.594	7.1249e-18	3	eIF3l
CG42663	5.69545e-22	0.430897	0.412	0.117	7.93547e-18	3	CG42663
CG33143	1.30214e-21	0.438236	0.556	0.191	1.81427e-17	3	CG33143
Ac3	1.71912e-21	0.484171	0.634	0.246	2.39524e-17	3	Ac3
RyR	3.85421e-21	0.382008	0.327	0.08	5.37007e-17	3	RyR
icln	4.60288e-21	0.410813	0.542	0.186	6.41319e-17	3	icln
Got1	7.58105e-21	0.314985	0.327	0.081	1.05627e-16	3	Got1
Sucb	7.76475e-21	0.341369	0.268	0.057	1.08186e-16	3	Sucb
CG324321	8.90079e-21	0.515282	0.752	0.33	1.24015e-16	3	CG32432
Act5C	1.56178e-20	0.542442	0.948	0.704	2.17603e-16	3	Act5C
CG14312	2.12486e-20	0.454739	0.954	0.738	2.96056e-16	3	CG14312
ths	3.33012e-20	0.319942	0.438	0.135	4.63986e-16	3	ths
nemy	3.56292e-20	0.46405	0.582	0.218	4.96422e-16	3	nemy
CG4587	3.99104e-20	0.389693	0.993	0.911	5.56072e-16	3	CG4587
Ctl2	4.23135e-20	0.391404	0.288	0.068	5.89554e-16	3	Ctl2
CG3262	6.28769e-20	0.39191	0.575	0.211	8.76064e-16	3	CG3262
Spp	6.67608e-20	0.383168	0.503	0.175	9.30178e-16	3	Spp
Cyp1	9.72756e-20	0.276951	1	0.99	1.35534e-15	3	Cyp1
CG1907	1.34282e-19	0.312843	0.333	0.087	1.87095e-15	3	CG1907
CG14591	2.53978e-19	0.382982	0.431	0.137	3.53867e-15	3	CG14591
unc-13-4A1	2.70019e-19	0.554617	0.627	0.267	3.76217e-15	3	unc-13-4A
Hasp	3.51313e-19	0.514494	0.81	0.448	4.89484e-15	3	Hasp
dpr15	4.48715e-19	0.398983	0.359	0.103	6.25194e-15	3	dpr15
dpr17	4.63068e-19	0.637101	0.431	0.147	6.45192e-15	3	dpr17
ttv	1.02429e-18	0.530156	0.869	0.57	1.42714e-14	3	ttv
RNASEK	1.22882e-18	0.399297	0.993	0.926	1.71211e-14	3	RNASEK
IscU	2.70262e-18	0.423024	0.935	0.599	3.76556e-14	3	IscU
CG5946	4.2774e-18	0.426887	0.601	0.25	5.9597e-14	3	CG5946
CG9164	5.29978e-18	0.347479	0.464	0.161	7.38418e-14	3	CG9164
CG31678	7.00292e-18	0.317204	0.431	0.141	9.75716e-14	3	CG31678
Hsp67Ba	1.53669e-17	0.321954	0.621	0.243	2.14107e-13	3	Hsp67Ba
CG33977	1.61929e-17	0.379427	0.673	0.285	2.25616e-13	3	CG33977
Nrk	1.62806e-17	0.342189	0.333	0.096	2.26837e-13	3	Nrk
Gapdh2	1.90864e-17	0.481234	0.882	0.526	2.65931e-13	3	Gapdh2
CG15431	2.51122e-17	0.312768	0.294	0.077	3.49889e-13	3	CG15431
CG12502	2.60206e-17	0.301177	0.431	0.143	3.62545e-13	3	CG12502
CG69591	3.46806e-17	0.760288	0.673	0.391	4.83206e-13	3	CG6959
Ten-m	3.65397e-17	0.381583	0.706	0.317	5.09108e-13	3	Ten-m
DnaJ-H	3.91037e-17	0.362903	0.49	0.179	5.44831e-13	3	DnaJ-H
CG33107	6.33063e-17	0.304953	0.458	0.159	8.82047e-13	3	CG33107
Tina-1	6.4688e-17	0.410428	0.935	0.615	9.01298e-13	3	Tina-1
Dak1	8.97894e-17	0.431094	0.699	0.334	1.25104e-12	3	Dak1
ND-MLRQ	1.10347e-16	0.365552	0.987	0.824	1.53746e-12	3	ND-MLRQ
Hsromega	1.25591e-16	0.330552	0.993	0.972	1.74986e-12	3	Hsromega
CG6044	1.33132e-16	0.352018	0.477	0.174	1.85493e-12	3	CG6044
hwt	1.40553e-16	0.431963	0.882	0.513	1.95832e-12	3	hwt
CG32225	1.63737e-16	0.264981	0.333	0.096	2.28135e-12	3	CG32225
Rtnl1	2.42526e-16	0.354722	0.993	0.918	3.37912e-12	3	Rtnl1
CG42674	2.60197e-16	0.579514	0.804	0.494	3.62532e-12	3	CG42674
CG3556	3.7049e-16	0.379671	0.699	0.322	5.16203e-12	3	CG3556
Meltrin	5.42877e-16	0.312417	0.255	0.065	7.56391e-12	3	Meltrin
prim	6.06028e-16	0.432543	0.791	0.428	8.44379e-12	3	prim
CG43143	6.0947e-16	0.441743	0.719	0.357	8.49174e-12	3	CG43143
Wee1	6.33208e-16	0.314877	0.379	0.126	8.82249e-12	3	Wee1
CR45520	7.29958e-16	0.315599	0.412	0.142	1.01705e-11	3	CR45520
Ufc1	7.97677e-16	0.309987	0.477	0.179	1.1114e-11	3	Ufc1
Rack1	1.45744e-15	0.290984	1	0.967	2.03065e-11	3	Rack1
crp	1.46507e-15	0.435212	0.81	0.433	2.04129e-11	3	crp
Parp	1.65935e-15	0.390246	0.869	0.511	2.31197e-11	3	Parp
Tsp42Ej	1.75997e-15	0.336996	0.993	0.898	2.45216e-11	3	Tsp42Ej
CNPYb	1.8092e-15	0.314518	0.444	0.161	2.52075e-11	3	CNPYb
RpLP2	2.27813e-15	0.262455	1	0.976	3.17411e-11	3	RpLP2
CG12402	2.34847e-15	0.260028	0.327	0.1	3.27213e-11	3	CG12402
eEF1beta	3.30382e-15	0.41087	0.882	0.59	4.60322e-11	3	eEF1beta
RpL4	3.34514e-15	0.284441	0.987	0.944	4.66078e-11	3	RpL4
CG11138	3.76002e-15	0.389676	0.993	0.821	5.23884e-11	3	CG11138
yki	3.77218e-15	0.349934	0.327	0.103	5.25578e-11	3	yki
B4	4.11279e-15	0.409327	0.699	0.348	5.73035e-11	3	B4
Nos	4.34304e-15	0.395403	0.307	0.094	6.05115e-11	3	Nos
eIF3i	4.46436e-15	0.376751	0.954	0.734	6.2202e-11	3	eIF3i
Nckx30C	4.47209e-15	0.3828	0.954	0.733	6.23096e-11	3	Nckx30C
Csl4	5.05194e-15	0.290255	0.268	0.073	7.03887e-11	3	Csl4
Calr	6.52065e-15	0.42713	0.837	0.488	9.08523e-11	3	Calr
Tpi	8.17988e-15	0.360631	0.758	0.359	1.1397e-10	3	Tpi
Psc1	8.49777e-15	0.325099	0.667	0.298	1.18399e-10	3	Psc
CG113191	1.03057e-14	0.415061	0.797	0.42	1.43589e-10	3	CG11319
put	1.04915e-14	0.394744	0.614	0.27	1.46178e-10	3	put
CG11360	1.1984e-14	0.407657	0.928	0.623	1.66974e-10	3	CG11360
CaBP1	1.94847e-14	0.38672	0.425	0.164	2.71481e-10	3	CaBP1
CG42322	2.29695e-14	0.421509	0.614	0.294	3.20034e-10	3	CG42322
zip	2.38328e-14	0.388663	0.634	0.29	3.32062e-10	3	zip
CG42394	2.39276e-14	0.406736	0.556	0.244	3.33384e-10	3	CG42394
SrpRbeta	2.53696e-14	0.325588	0.451	0.176	3.53475e-10	3	SrpRbeta
Syn1	2.5473e-14	0.380451	0.85	0.488	3.54915e-10	3	Syn1
14-3-3epsilon	2.90207e-14	0.269087	1	0.973	4.04345e-10	3	14-3-3epsilon
EndoB	3.43081e-14	0.320929	0.641	0.285	4.78014e-10	3	EndoB
chinmo	3.85894e-14	0.395294	0.954	0.71	5.37667e-10	3	chinmo
Myo81F	4.69159e-14	0.367295	0.889	0.5	6.53679e-10	3	Myo81F
orb2	5.18912e-14	0.408658	0.954	0.74	7.23e-10	3	orb2
5-HT1B	5.32963e-14	0.346367	0.32	0.107	7.42577e-10	3	5-HT1B
l(1)G0320	5.7298e-14	0.386233	0.712	0.38	7.98333e-10	3	l(1)G0320
CG6770	6.06437e-14	0.318563	0.993	0.846	8.44949e-10	3	CG6770
CG18081	6.12228e-14	0.31141	0.562	0.236	8.53017e-10	3	CG18081
Ostgamma	6.38941e-14	0.345859	0.503	0.212	8.90237e-10	3	Ostgamma
CG7781	7.48548e-14	0.294293	1	0.904	1.04295e-09	3	CG7781
CG9121	8.3797e-14	0.27282	0.366	0.128	1.16754e-09	3	CG9121
CG9413	8.69388e-14	0.369071	0.536	0.241	1.21132e-09	3	CG9413
CG32982	8.75264e-14	0.275752	0.333	0.108	1.2195e-09	3	CG32982
CG3198	9.3829e-14	0.406836	0.647	0.336	1.30732e-09	3	CG3198
EMC8-9	1.3566e-13	0.319483	0.549	0.244	1.89015e-09	3	EMC8-9
eIF3g1	1.52758e-13	0.372649	0.908	0.647	2.12838e-09	3	eIF3g1
CG1640	1.55342e-13	0.275511	0.314	0.101	2.16438e-09	3	CG1640
COX7A	1.83174e-13	0.280544	0.98	0.939	2.55216e-09	3	COX7A
Blimp-1	2.10622e-13	0.364785	0.386	0.147	2.9346e-09	3	Blimp-1
mAChR-B	2.61681e-13	0.257962	0.301	0.093	3.646e-09	3	mAChR-B
Eip63E	2.67038e-13	0.363672	0.922	0.629	3.72065e-09	3	Eip63E
beat-IIIc	3.48567e-13	0.257505	0.379	0.14	4.85658e-09	3	beat-IIIc
eIF3f1	3.62264e-13	0.348463	0.941	0.692	5.04743e-09	3	eIF3f1
CG33170	5.01713e-13	0.358165	0.608	0.293	6.99036e-09	3	CG33170
CR453121	5.60831e-13	0.317661	0.582	0.265	7.81406e-09	3	CR45312
rogdi	6.27532e-13	0.284767	0.418	0.161	8.7434e-09	3	rogdi
nwk	8.50862e-13	0.326747	0.673	0.336	1.18551e-08	3	nwk
CG11448	1.00037e-12	0.275905	0.464	0.195	1.39382e-08	3	CG11448
Dim1	1.03334e-12	0.29837	0.549	0.242	1.43975e-08	3	Dim1
2021-09-04	1.35346e-12	0.327385	0.634	0.297	1.88577e-08	3	2021-09-04
Rab26	1.66036e-12	0.329582	0.83	0.458	2.31338e-08	3	Rab26
CG13300	2.11605e-12	0.306858	0.425	0.172	2.9483e-08	3	CG13300
CG16779	2.77122e-12	0.350967	0.908	0.627	3.86115e-08	3	CG16779
Pak3	2.88925e-12	0.295009	0.621	0.288	4.02559e-08	3	Pak3
CG9384	2.92014e-12	0.257238	0.327	0.116	4.06863e-08	3	CG9384
trv1	2.93362e-12	0.288461	0.974	0.734	4.08742e-08	3	trv
CG16481	3.02637e-12	0.375779	0.399	0.162	4.21664e-08	3	CG1648
jagn	3.02893e-12	0.309579	0.386	0.152	4.22021e-08	3	jagn
RpL39	3.8742e-12	0.254151	0.993	0.935	5.39793e-08	3	RpL39
CR42862	4.75219e-12	0.337612	0.987	0.855	6.62122e-08	3	CR42862
Mnn1	4.82881e-12	0.379195	0.784	0.484	6.72798e-08	3	Mnn1
Act42A	5.29303e-12	0.273965	0.902	0.56	7.37478e-08	3	Act42A
Gapdh1	7.58344e-12	0.346889	0.595	0.293	1.0566e-07	3	Gapdh1
hang	8.25935e-12	0.306925	0.634	0.316	1.15078e-07	3	hang
CG34113	8.40825e-12	0.532209	0.941	0.754	1.17152e-07	3	CG34113
CG34136	1.07974e-11	0.292709	0.484	0.214	1.5044e-07	3	CG34136
UQCR-11	1.1484e-11	0.350421	0.98	0.846	1.60006e-07	3	UQCR-11
PhKgamma	1.1624e-11	0.286492	0.516	0.235	1.61957e-07	3	PhKgamma
HmgZ1	1.22749e-11	0.309885	1	0.975	1.71026e-07	3	HmgZ
sfl	1.33931e-11	0.346418	0.569	0.275	1.86607e-07	3	sfl
CG7991	1.4248e-11	0.333847	0.784	0.447	1.98517e-07	3	CG7991
CG10803	1.61705e-11	0.270897	0.471	0.204	2.25303e-07	3	CG10803
GABPI	1.87246e-11	0.267763	0.542	0.246	2.6089e-07	3	GABPI
FKBP59	2.15722e-11	0.295834	0.614	0.294	3.00566e-07	3	FKBP59
Plod	2.29513e-11	0.321173	0.34	0.13	3.1978e-07	3	Plod
SmD3	2.39584e-11	0.297754	0.359	0.144	3.33812e-07	3	SmD3
CG11000	2.8652e-11	0.276128	0.556	0.255	3.99208e-07	3	CG11000
CG13751	2.98671e-11	0.272565	0.484	0.215	4.16138e-07	3	CG13751
Rsf1	3.15177e-11	0.308316	0.987	0.805	4.39137e-07	3	Rsf1
Cnx99A	3.30933e-11	0.285321	0.673	0.336	4.61089e-07	3	Cnx99A
pho	3.32689e-11	0.336552	0.673	0.363	4.63535e-07	3	pho
E2f1	3.58206e-11	0.253179	0.529	0.236	4.99088e-07	3	E2f1
Idh	4.68533e-11	0.295206	0.405	0.174	6.52807e-07	3	Idh
CG3662	4.77613e-11	0.299313	0.837	0.486	6.65459e-07	3	CG3662
Atf6	4.7971e-11	0.300882	0.464	0.209	6.68381e-07	3	Atf6
RpL24-like	7.34869e-11	0.303816	0.928	0.713	1.02389e-06	3	RpL24-like
Hsc70-3	7.97937e-11	0.343342	0.712	0.389	1.11176e-06	3	Hsc70-3
Gabat	8.54363e-11	0.351881	0.68	0.368	1.19038e-06	3	Gabat
CG16791	8.89341e-11	0.330873	0.843	0.512	1.23912e-06	3	CG16791
CG43778	9.02185e-11	0.266121	0.392	0.163	1.25701e-06	3	CG43778
CG45049	9.66771e-11	0.268256	0.993	0.869	1.347e-06	3	CG45049
Adar	1.64007e-10	0.281073	0.621	0.308	2.28511e-06	3	Adar
CG13594	1.92029e-10	0.262718	0.405	0.175	2.67554e-06	3	CG13594
ND-13A	1.94576e-10	0.326617	0.778	0.465	2.71102e-06	3	ND-13A
Jafrac1	2.05679e-10	0.295264	0.85	0.544	2.86572e-06	3	Jafrac1
twr	2.07056e-10	0.330936	0.739	0.406	2.88491e-06	3	twr
Tm1	2.34551e-10	0.264802	0.948	0.754	3.268e-06	3	Tm1
Rop	3.36071e-10	0.334185	0.765	0.431	4.68248e-06	3	Rop
CG39671	3.97484e-10	0.361378	0.745	0.463	5.53815e-06	3	CG3967
Mid1	4.66122e-10	0.323874	0.889	0.644	6.49447e-06	3	Mid1
flw	5.15316e-10	0.307134	0.732	0.392	7.1799e-06	3	flw
CG6024	5.26484e-10	0.324958	0.739	0.448	7.3355e-06	3	CG6024
ergic53	5.32454e-10	0.266393	0.523	0.253	7.41868e-06	3	ergic53
CG42340	5.44275e-10	0.320824	0.889	0.576	7.58338e-06	3	CG42340
InR	5.76015e-10	0.252866	0.614	0.314	8.02561e-06	3	InR
Toll-6	6.38951e-10	0.402287	0.869	0.586	8.9025e-06	3	Toll-6
GMF	7.07967e-10	0.260412	0.627	0.311	9.8641e-06	3	GMF
CG31324	7.47182e-10	0.334385	0.49	0.254	1.04105e-05	3	CG31324
CG41378	9.01106e-10	0.296385	0.608	0.32	1.25551e-05	3	CG41378
CG2993	9.50782e-10	0.301062	0.804	0.482	1.32472e-05	3	CG2993
ClC-b	9.95306e-10	0.258957	0.255	0.093	1.38676e-05	3	ClC-b
Hk	1.03018e-09	0.267992	0.889	0.621	1.43535e-05	3	Hk
CG14853	1.05507e-09	0.270592	0.536	0.26	1.47003e-05	3	CG14853
CG43066	1.18059e-09	0.295298	0.66	0.361	1.64491e-05	3	CG43066
brat	1.31694e-09	0.291752	0.922	0.713	1.83489e-05	3	brat
nAChRalpha71	1.32801e-09	0.368058	0.935	0.803	1.85032e-05	3	nAChRalpha7
Vha26	1.37566e-09	0.346701	0.856	0.58	1.91671e-05	3	Vha26
Snap25	1.69726e-09	0.29657	0.967	0.786	2.3648e-05	3	Snap25
KdelR	1.7371e-09	0.286655	0.784	0.467	2.42031e-05	3	KdelR
Sod1	1.78563e-09	0.26706	0.974	0.738	2.48791e-05	3	Sod1
Lsm12	1.97541e-09	0.265463	0.817	0.5	2.75234e-05	3	Lsm12
l(1)G0156	2.26555e-09	0.30138	0.824	0.518	3.15658e-05	3	l(1)G0156
CG7484	2.3856e-09	0.262683	0.595	0.297	3.32386e-05	3	CG7484
CG44242	2.38843e-09	0.290563	0.889	0.648	3.3278e-05	3	CG44242
Akap200	3.17289e-09	0.329205	0.569	0.308	4.42078e-05	3	Akap200
alpha-Man-IIb	3.32397e-09	0.268813	0.366	0.161	4.63128e-05	3	alpha-Man-IIb
UQCR-Q	3.44048e-09	0.296089	0.941	0.773	4.79361e-05	3	UQCR-Q
kcc	3.97573e-09	0.268993	0.686	0.378	5.53939e-05	3	kcc
Bgb	4.22772e-09	0.257569	0.804	0.482	5.89048e-05	3	Bgb
HisRS	4.24785e-09	0.273529	0.281	0.111	5.91853e-05	3	HisRS
CG3542	4.34139e-09	0.319923	0.307	0.13	6.04886e-05	3	CG3542
CG10139	4.43e-09	0.29637	0.477	0.238	6.17232e-05	3	CG10139
TM4SF	5.12858e-09	0.325254	0.837	0.512	7.14565e-05	3	TM4SF
CG8818	5.21813e-09	0.257706	0.542	0.271	7.27043e-05	3	CG8818
Pp1alpha-96A	5.24748e-09	0.283093	0.856	0.573	7.31132e-05	3	Pp1alpha-96A
kek5	5.81404e-09	0.25181	0.425	0.195	8.1007e-05	3	kek5
Spase22-23	6.48852e-09	0.285184	0.503	0.255	9.04046e-05	3	Spase22-23
CG10384	7.27619e-09	0.455481	0.706	0.445	0.000101379	3	CG10384
Hex-A	8.62898e-09	0.385603	0.771	0.49	0.000120228	3	Hex-A
Shal	8.7518e-09	0.300342	0.588	0.334	0.000121939	3	Shal
elm	1.00087e-08	0.282058	0.68	0.375	0.000139452	3	elm
RpL34a	1.10146e-08	0.27594	0.889	0.632	0.000153466	3	RpL34a
PsGEF	1.17424e-08	0.251506	0.608	0.335	0.000163606	3	PsGEF
Galphao	1.26014e-08	0.276278	0.948	0.821	0.000175575	3	Galphao
CG13685	1.41286e-08	0.306541	0.667	0.407	0.000196855	3	CG13685
Pglym78	1.45772e-08	0.290219	0.706	0.4	0.000203104	3	Pglym78
rin	1.4786e-08	0.27874	0.935	0.759	0.000206013	3	rin
P5CDh1	1.57416e-08	0.271263	0.438	0.216	0.000219328	3	P5CDh1
NUCB1	1.65103e-08	0.32296	0.765	0.462	0.000230039	3	NUCB1
CG423132	1.92423e-08	0.304696	0.961	0.758	0.000268103	3	CG42313
scrt	2.28739e-08	0.256742	0.967	0.819	0.000318702	3	scrt
Nadsyn	2.48124e-08	0.27402	0.562	0.301	0.000345712	3	Nadsyn
AdSS	2.57413e-08	0.26995	0.654	0.359	0.000358654	3	AdSS
Pdi	3.13e-08	0.295184	0.641	0.37	0.000436103	3	Pdi
CG7945	3.90017e-08	0.250759	0.66	0.371	0.000543411	3	CG7945
CkIIbeta	3.95986e-08	0.253775	0.817	0.509	0.000551727	3	CkIIbeta
vih	4.55578e-08	0.270138	0.556	0.307	0.000634757	3	vih
csw	4.83036e-08	0.253436	0.81	0.521	0.000673014	3	csw
KrT95D	6.64772e-08	0.30801	0.882	0.606	0.000926227	3	KrT95D
CG12605	6.97991e-08	0.281597	0.869	0.6	0.000972511	3	CG12605
Evi5	1.30777e-07	0.254299	0.908	0.648	0.00182212	3	Evi5
ND-B14	1.51129e-07	0.259701	0.869	0.633	0.00210568	3	ND-B14
CG3625	2.10355e-07	0.29942	0.752	0.498	0.00293087	3	CG3625
CG17698	2.17889e-07	0.269682	0.575	0.338	0.00303585	3	CG17698
X11Lbeta	2.23382e-07	0.305496	0.85	0.581	0.00311239	3	X11Lbeta
Sema2b	3.33923e-07	0.289484	0.804	0.522	0.00465255	3	Sema2b
CG9674	3.84156e-07	0.256428	0.464	0.255	0.00535244	3	CG9674
Reph	4.38269e-07	0.275773	0.843	0.567	0.00610641	3	Reph
betaTub56D	1.7363e-06	0.321108	0.902	0.784	0.0241919	3	betaTub56D
Mpcp2	2.60799e-06	0.250525	0.915	0.754	0.0363371	3	Mpcp2
roX1	4.48833e-06	0.431613	0.359	0.191	0.0625359	3	roX1
Shab1	6.64119e-06	0.256935	0.804	0.557	0.0925317	3	Shab
eIF4EHP	1.32064e-05	0.253871	0.817	0.585	0.184004	3	eIF4EHP
Drl-2	1.61396e-05	0.262928	0.536	0.328	0.224872	3	Drl-2
roX2	3.69767e-177	2.51521	0.987	0.098	5.15196e-173	4	roX2
roX11	9.65906e-147	2.05292	0.987	0.125	1.3458e-142	4	roX1
rad2	1.56296e-31	0.551886	1	0.938	2.17768e-27	4	rad
RpL35	2.26044e-28	0.625041	0.927	0.838	3.14947e-24	4	RpL35
RpL27A	2.68949e-27	0.330249	1	0.988	3.74727e-23	4	RpL27A
CG76461	2.13564e-25	0.508357	1	0.946	2.97559e-21	4	CG7646
RpL36	2.68953e-25	0.335763	1	0.983	3.74733e-21	4	RpL36
RpL15	4.97121e-24	0.313695	1	0.992	6.92639e-20	4	RpL15
gish	5.17203e-20	0.382747	0.993	0.945	7.20619e-16	4	gish
Sema1a1	1.08994e-19	0.389785	1	0.967	1.51861e-15	4	Sema1a
Rgk11	1.3424e-19	0.499707	0.987	0.847	1.87037e-15	4	Rgk1
Pka-C32	4.03492e-19	0.56152	0.927	0.581	5.62186e-15	4	Pka-C3
pan	4.29958e-19	0.467431	0.947	0.893	5.99061e-15	4	pan
CG9821	8.81336e-19	0.296682	1	0.992	1.22797e-14	4	CG9821
rdgA1	2.17049e-18	0.587988	0.828	0.555	3.02414e-14	4	rdgA
prt1	4.0334e-18	0.647091	0.781	0.49	5.61973e-14	4	prt
mub2	5.59347e-18	0.376998	1	0.985	7.79339e-14	4	mub
RpL8	7.68899e-18	0.31124	0.993	0.985	1.07131e-13	4	RpL8
RpL7A	8.38236e-18	0.265519	1	0.991	1.16791e-13	4	RpL7A
RpL31	1.11798e-17	0.302026	1	0.98	1.55768e-13	4	RpL31
tna1	1.75707e-17	0.445091	0.987	0.924	2.44812e-13	4	tna
RpL10Ab	7.23799e-17	0.266217	1	0.985	1.00847e-12	4	RpL10Ab
CG425411	5.47262e-16	0.407583	1	0.967	7.62501e-12	4	CG42541
RpS9	6.26849e-16	0.265178	1	0.985	8.73388e-12	4	RpS9
RpS26	4.12888e-15	0.250238	1	0.981	5.75276e-11	4	RpS26
pum	6.31366e-15	0.282094	1	0.985	8.79682e-11	4	pum
dan	7.36919e-15	0.524473	0.278	0.087	1.02675e-10	4	dan
CG424022	1.06578e-14	0.354196	1	0.922	1.48494e-10	4	CG42402
RpS3A	1.27568e-14	0.25733	0.987	0.982	1.77741e-10	4	RpS3A
FoxP	2.38981e-14	0.509764	0.775	0.61	3.32972e-10	4	FoxP
Nacalpha	3.21754e-14	0.300662	0.987	0.966	4.483e-10	4	Nacalpha
Pka-C12	4.72201e-14	0.388267	1	0.964	6.57918e-10	4	Pka-C1
Pka-R22	1.56932e-13	0.38149	1	0.921	2.18653e-09	4	Pka-R2
CG427881	1.57038e-13	0.521472	0.583	0.352	2.188e-09	4	CG42788
bru31	2.56036e-13	0.305265	1	0.962	3.56734e-09	4	bru3
Dl	2.91361e-13	0.532537	0.364	0.148	4.05954e-09	4	Dl
VhaM9.7-a	3.80476e-13	0.352601	0.98	0.942	5.30117e-09	4	VhaM9.7-a
Hsromega1	7.17437e-13	0.302367	0.993	0.972	9.99604e-09	4	Hsromega
rut1	7.81813e-13	0.382871	0.96	0.787	1.0893e-08	4	rut
Swip-1	1.48939e-12	0.463107	0.775	0.626	2.07517e-08	4	Swip-1
olf4132	2.19015e-12	0.369606	0.974	0.783	3.05154e-08	4	olf413
fend1	2.73026e-12	0.396681	0.887	0.843	3.80407e-08	4	fend
CG32276	3.04324e-12	0.361168	0.795	0.634	4.24015e-08	4	CG32276
CG433243	9.386e-12	0.348882	0.993	0.908	1.30775e-07	4	CG43324
CG327002	9.5952e-12	0.38526	0.993	0.762	1.3369e-07	4	CG32700
CG58301	1.12024e-11	0.497941	0.616	0.386	1.56083e-07	4	CG5830
CG41128	1.62563e-11	0.48462	0.682	0.509	2.26499e-07	4	CG41128
Calx1	1.95113e-11	0.417286	0.854	0.764	2.71851e-07	4	Calx
CG40045	2.17013e-11	0.365083	0.828	0.751	3.02364e-07	4	CG40045
NfI	3.08176e-11	0.443558	0.49	0.281	4.29381e-07	4	NfI
cv-c1	3.41365e-11	0.451256	0.689	0.446	4.75623e-07	4	cv-c
danr1	6.95199e-11	0.534038	0.464	0.25	9.68621e-07	4	danr
dpr211	8.0392e-11	0.411911	0.868	0.817	1.1201e-06	4	dpr21
Dop1R11	1.33569e-10	0.325232	0.947	0.794	1.86102e-06	4	Dop1R1
w2	2.43072e-10	0.467114	0.841	0.674	3.38673e-06	4	w
Cyt-c-p1	2.73891e-10	0.302521	0.954	0.892	3.81612e-06	4	Cyt-c-p
ab2	3.19116e-10	0.324306	1	0.793	4.44624e-06	4	ab
RpL38	3.44678e-10	0.273889	1	0.978	4.80239e-06	4	RpL38
Bx2	4.60382e-10	0.34046	0.96	0.723	6.4145e-06	4	Bx
Dop2R2	5.65597e-10	0.323009	0.894	0.773	7.88047e-06	4	Dop2R
Rgk31	1.10374e-09	0.355162	0.861	0.665	1.53784e-05	4	Rgk3
amon1	1.40831e-09	0.347982	0.841	0.688	1.9622e-05	4	amon
bma1	1.42616e-09	0.435575	0.728	0.548	1.98706e-05	4	bma
CG319973	2.62432e-09	0.528808	0.762	0.559	3.65647e-05	4	CG31997
CG344023	2.84064e-09	0.327686	0.954	0.64	3.95786e-05	4	CG34402
heph1	3.23829e-09	0.309099	0.914	0.802	4.51191e-05	4	heph
Glut4EF1	4.81869e-09	0.265087	0.974	0.908	6.71388e-05	4	Glut4EF
dac2	7.06458e-09	0.357607	0.669	0.425	9.84308e-05	4	dac
CG100191	1.21023e-08	0.444732	0.623	0.467	0.000168621	4	CG10019
HDAC41	2.96069e-08	0.346621	0.755	0.626	0.000412513	4	HDAC4
Pde1c1	3.49768e-08	0.325809	0.861	0.774	0.000487332	4	Pde1c
Spred	3.56841e-08	0.298855	0.848	0.768	0.000497187	4	Spred
skd	4.12755e-08	0.264648	0.934	0.875	0.000575091	4	skd
Imp3	6.34228e-08	0.303953	0.874	0.661	0.00088367	4	Imp
norpA1	6.53524e-08	0.328721	0.748	0.61	0.000910555	4	norpA
CG172721	6.68072e-08	0.321159	0.728	0.571	0.000930825	4	CG17272
puc1	1.29859e-07	0.41467	0.649	0.488	0.00180933	4	puc
Tsp39D	1.95953e-07	0.284472	0.821	0.715	0.00273022	4	Tsp39D
Toll-71	3.48716e-07	0.317313	0.762	0.574	0.00485865	4	Toll-7
CG37261	4.1845e-07	0.378815	0.536	0.373	0.00583026	4	CG3726
SPR1	4.62494e-07	0.398669	0.556	0.429	0.00644393	4	SPR
REPTOR-BP	5.23576e-07	0.455881	0.444	0.309	0.00729498	4	REPTOR-BP
CG42971	7.83945e-07	0.401044	0.417	0.266	0.0109227	4	CG4297
ftz-f1	8.14086e-07	0.623733	0.457	0.337	0.0113427	4	ftz-f1
comm1	1.01301e-06	0.444097	0.483	0.345	0.0141142	4	comm
CG40178	1.0607e-06	0.267124	0.881	0.822	0.0147787	4	CG40178
Pdp1	1.06243e-06	0.310337	0.801	0.73	0.0148028	4	Pdp1
mura	1.30625e-06	0.346301	0.682	0.627	0.0182	4	mura
ed1	1.33098e-06	0.328629	0.682	0.532	0.0185446	4	ed
CG139211	1.36338e-06	0.381126	0.53	0.387	0.018996	4	CG13921
Sam-S	1.43928e-06	0.368766	0.563	0.454	0.0200535	4	Sam-S
CR46006	1.52274e-06	0.447895	0.457	0.311	0.0212163	4	CR46006
Asator	1.74865e-06	0.382872	0.556	0.452	0.0243639	4	Asator
Apc	2.33715e-06	0.426963	0.411	0.283	0.0325636	4	Apc
Ip259	2.53082e-06	0.306361	0.828	0.777	0.0352619	4	Ip259
CG44422	3.61921e-06	0.383292	0.371	0.22	0.0504265	4	CG44422
Cpr65Ea1	4.19061e-06	0.291222	0.45	0.281	0.0583877	4	Cpr65Ea
onecut	4.50364e-06	0.36176	0.57	0.476	0.0627493	4	onecut
ey2	5.03702e-06	0.261729	0.709	0.568	0.0701808	4	ey
RpL5	5.23377e-06	0.298105	0.801	0.764	0.0729221	4	RpL5
Arf102F	6.54859e-06	0.296749	0.642	0.557	0.0912415	4	Arf102F
phyl1	6.55553e-06	0.283192	0.642	0.511	0.0913382	4	phyl
bru11	6.86142e-06	0.298488	0.55	0.408	0.0956001	4	bru1
Hr511	7.0958e-06	0.285674	0.576	0.397	0.0988658	4	Hr51
toy2	8.1176e-06	0.266556	0.854	0.682	0.113102	4	toy
robl	8.99115e-06	0.270525	0.642	0.55	0.125274	4	robl
CG5934	9.71454e-06	0.363041	0.444	0.332	0.135353	4	CG5934
CG89102	9.7521e-06	0.303568	0.563	0.424	0.135876	4	CG8910
CG43736	1.27453e-05	0.3909	0.55	0.459	0.177581	4	CG43736
CycT1	1.94863e-05	0.308434	0.503	0.39	0.271503	4	CycT
Trpm1	2.44921e-05	0.286511	0.43	0.295	0.341249	4	Trpm
CG12950	2.61507e-05	0.318982	0.464	0.352	0.364358	4	CG12950
Maf1	2.6422e-05	0.265157	0.695	0.622	0.368138	4	Maf1
PVRAP1	2.78471e-05	0.301779	0.623	0.511	0.387994	4	PVRAP
flw1	3.61802e-05	0.371448	0.503	0.417	0.504099	4	flw
klar	3.74704e-05	0.266381	0.675	0.646	0.522075	4	klar
qkr58E-3	8.62335e-05	0.340709	0.457	0.351	1	4	qkr58E-3
CG14464	9.10569e-05	0.262693	0.629	0.569	1	4	CG14464
SLO2	0.000105727	0.257904	0.596	0.514	1	4	SLO2
spir	0.000108326	0.331526	0.424	0.318	1	4	spir
Dif2	0.000145524	0.255466	0.404	0.268	1	4	Dif
CG4660	0.000153448	0.369496	0.351	0.245	1	4	CG4660
loqs	0.00017535	0.283609	0.556	0.502	1	4	loqs
mgl1	0.00019517	0.280845	0.543	0.45	1	4	mgl
Hipk	0.000231784	0.283848	0.755	0.734	1	4	Hipk
Hr3	0.000301699	0.279988	0.675	0.629	1	4	Hr3
CG32017	0.000316755	0.275706	0.523	0.441	1	4	CG32017
scyl1	0.000316859	0.259711	0.934	0.908	1	4	scyl
CG5861	0.000318589	0.263314	0.497	0.42	1	4	CG5861
NK7.11	0.000322178	0.291727	0.483	0.385	1	4	NK7.1
stck	0.000389418	0.308539	0.258	0.164	1	4	stck
CG40228	0.000456748	0.251053	0.616	0.566	1	4	CG40228
Klp98A	0.000492769	0.364504	0.411	0.342	1	4	Klp98A
siz	0.000566111	0.301667	0.444	0.369	1	4	siz
Rab21	0.000581699	0.254185	0.384	0.296	1	4	Rab21
VhaM9.7-b	0.000587744	0.312547	0.444	0.38	1	4	VhaM9.7-b
PlexA	0.000804199	0.251208	0.669	0.606	1	4	PlexA
mim1	0.0008488	0.277157	0.45	0.367	1	4	mim
MED21	0.00123001	0.333628	0.258	0.176	1	4	MED21
ckn1	0.00147172	0.258609	0.57	0.532	1	4	ckn
CG5746	0.00180199	0.265034	0.444	0.386	1	4	CG5746
CR440241	0.00198211	0.298848	0.311	0.231	1	4	CR44024
dpr7	0.00240261	0.258742	0.623	0.595	1	4	dpr7
CG32772	0.00268708	0.258135	0.397	0.33	1	4	CG32772
CG15715	0.00428496	0.302627	0.338	0.271	1	4	CG15715
CG5110	0.00469962	0.272689	0.278	0.206	1	4	CG5110
toc	0.00558667	0.27186	0.497	0.462	1	4	toc
CG9896	5.08789e-157	2.14264	0.934	0.06	7.08896e-153	5	CG9896
SoxN	4.37715e-142	2.09354	0.934	0.071	6.09868e-138	5	SoxN
DIP-eta	1.28964e-136	2.52782	0.989	0.098	1.79686e-132	5	DIP-eta
CG9650	1.61313e-122	2.22857	0.978	0.11	2.24758e-118	5	CG9650
Sox102F	9.52707e-106	1.42008	0.725	0.055	1.32741e-101	5	Sox102F
glob1	2.42382e-104	1.54747	0.747	0.063	3.37711e-100	5	glob1
beat-Ic1	1.12376e-99	2.52569	1	0.19	1.56574e-95	5	beat-Ic
pdm3	2.18134e-97	1.95139	0.978	0.161	3.03926e-93	5	pdm3
beat-Ia	2.58329e-93	2.12075	0.967	0.173	3.5993e-89	5	beat-Ia
dpr13	2.90626e-88	2.40174	1	0.228	4.0493e-84	5	dpr13
CG43902	5.88083e-84	2.09183	1	0.227	8.19376e-80	5	CG43902
beat-Ib1	1.00959e-79	1.87323	0.934	0.187	1.40665e-75	5	beat-Ib
nuf	7.46364e-78	1.54459	0.868	0.153	1.03991e-73	5	nuf
Ptp10D	6.13948e-74	1.97866	0.967	0.262	8.55414e-70	5	Ptp10D
Pvf31	1.08497e-70	2.04878	0.989	0.278	1.51169e-66	5	Pvf3
Grip	2.41802e-65	0.781462	0.341	0.014	3.36902e-61	5	Grip
scro	5.96095e-64	1.13815	0.527	0.049	8.30539e-60	5	scro
CG34347	1.11636e-63	1.07706	0.648	0.086	1.55542e-59	5	CG34347
cv-21	7.56212e-61	1.42872	0.736	0.13	1.05363e-56	5	cv-2
CG33639	1.55417e-60	1.42297	0.813	0.173	2.16543e-56	5	CG33639
luna	7.11999e-59	1.57252	0.945	0.28	9.92027e-55	5	luna
CG99321	1.6377e-57	1.31867	0.879	0.202	2.28181e-53	5	CG9932
CG31690	3.52021e-57	1.24089	0.681	0.116	4.90471e-53	5	CG31690
CG42540	6.00927e-56	2.12928	1	0.731	8.37271e-52	5	CG42540
dpr1	1.03372e-55	2.19219	1	0.583	1.44028e-51	5	dpr1
robo3	1.58228e-55	0.980809	0.593	0.082	2.20459e-51	5	robo3
CG125941	2.54937e-54	1.53733	0.945	0.302	3.55204e-50	5	CG12594
Syp	4.87959e-54	1.77342	0.989	0.539	6.79874e-50	5	Syp
CG34377	5.70974e-54	0.885696	0.385	0.029	7.95538e-50	5	CG34377
CG436581	3.00816e-50	1.66151	0.989	0.557	4.19127e-46	5	CG43658
SKIP	8.46971e-49	1.3146	0.78	0.191	1.18008e-44	5	SKIP
Ccn	1.19439e-48	1.44717	0.835	0.243	1.66414e-44	5	Ccn
shep1	1.46493e-47	1.18308	1	0.97	2.04109e-43	5	shep
mbl	6.70767e-47	1.01804	0.901	0.245	9.3458e-43	5	mbl
hbs	1.49052e-46	0.909019	0.538	0.08	2.07674e-42	5	hbs
CG14795	1.65113e-46	0.805181	0.407	0.04	2.30052e-42	5	CG14795
Dscam4	1.17243e-44	1.37237	0.978	0.569	1.63355e-40	5	Dscam4
cmpy	5.02542e-44	1.05028	1	0.89	7.00192e-40	5	cmpy
CG437591	4.69765e-43	1.24534	0.725	0.183	6.54524e-39	5	CG43759
mam	1.63056e-42	1.14341	1	0.801	2.27186e-38	5	mam
CG42747	5.71175e-42	0.951809	0.582	0.104	7.95818e-38	5	CG42747
Tsp66E1	6.84914e-42	1.13971	0.923	0.302	9.54291e-38	5	Tsp66E
ap	1.3235e-41	1.0195	0.582	0.11	1.84403e-37	5	ap
TkR86C	1.71647e-41	0.965617	0.56	0.1	2.39156e-37	5	TkR86C
shakB1	2.14036e-40	1.02753	1	0.939	2.98216e-36	5	shakB
Spn	3.20524e-40	0.930932	0.989	0.93	4.46586e-36	5	Spn
dpr22	1.06785e-39	1.06921	0.67	0.159	1.48783e-35	5	dpr2
kirre	1.30292e-39	1.17223	0.769	0.211	1.81536e-35	5	kirre
dpr31	2.63325e-39	1.04066	0.582	0.121	3.6689e-35	5	dpr3
CG135941	7.42796e-39	1.10653	0.67	0.169	1.03494e-34	5	CG13594
Ace	2.50049e-38	1.26245	0.824	0.309	3.48393e-34	5	Ace
pros1	2.58907e-38	0.837386	1	0.906	3.60735e-34	5	pros
cpo	2.88535e-38	0.889423	0.989	0.957	4.02016e-34	5	cpo
CG2082	7.44074e-37	1.02626	0.637	0.155	1.03672e-32	5	CG2082
CG441531	8.93357e-37	1.06619	0.769	0.213	1.24471e-32	5	CG44153
oaf	1.14756e-36	1.16241	0.714	0.214	1.59889e-32	5	oaf
spab	1.47837e-36	1.06651	0.989	0.676	2.05981e-32	5	spab
Ca-alpha1T1	4.15972e-36	1.42849	0.78	0.252	5.79574e-32	5	Ca-alpha1T
GluClalpha1	4.93722e-36	0.958953	0.978	0.765	6.87903e-32	5	GluClalpha
CR314511	1.14385e-35	0.927729	0.978	0.903	1.59373e-31	5	CR31451
SP2353	1.30415e-34	1.08453	0.813	0.3	1.81707e-30	5	SP2353
HmgD	2.04044e-33	1.05821	0.835	0.309	2.84295e-29	5	HmgD
smal	6.86495e-32	0.873023	0.56	0.131	9.56494e-28	5	smal
nAChRalpha3	1.44867e-31	0.82418	0.538	0.12	2.01843e-27	5	nAChRalpha3
tok	2.124e-31	1.03411	0.648	0.181	2.95937e-27	5	tok
nmo	2.24264e-31	0.802997	0.978	0.843	3.12467e-27	5	nmo
jim1	2.81479e-31	0.816218	1	0.878	3.92185e-27	5	jim
LRP11	4.3748e-31	0.894351	0.615	0.168	6.09541e-27	5	LRP1
Eip63F-1	4.91216e-31	0.820249	0.385	0.061	6.84411e-27	5	Eip63F-1
kek21	1.74156e-30	0.878648	0.802	0.27	2.42651e-26	5	kek2
AstC-R11	2.80071e-30	0.7947	0.473	0.098	3.90223e-26	5	AstC-R1
Ten-m1	1.69952e-28	0.976195	0.791	0.328	2.36793e-24	5	Ten-m
SP1029	2.05832e-28	0.620277	0.253	0.025	2.86785e-24	5	SP1029
beat-IIIc1	2.12768e-28	1.21167	0.538	0.14	2.9645e-24	5	beat-IIIc
CG36551	2.36593e-28	0.954547	0.736	0.254	3.29645e-24	5	CG3655
Nrg	2.42585e-28	0.913019	0.945	0.643	3.37994e-24	5	Nrg
CG424921	3.72523e-27	0.612444	1	0.953	5.19037e-23	5	CG42492
Hk1	1.05528e-26	0.909853	0.956	0.628	1.47032e-22	5	Hk
CadN1	1.14921e-26	0.836222	0.956	0.546	1.60119e-22	5	CadN
CG341131	1.43418e-26	0.88215	0.956	0.761	1.99824e-22	5	CG34113
chinmo1	1.49914e-26	0.80175	0.956	0.72	2.08876e-22	5	chinmo
Hsp23	4.34609e-26	0.879083	0.912	0.408	6.05541e-22	5	Hsp23
CG33144	9.53679e-26	0.985221	0.604	0.194	1.32876e-21	5	CG33144
Btk29A	1.90948e-25	0.870697	0.824	0.383	2.66048e-21	5	Btk29A
otk	3.32886e-25	1.0395	0.681	0.252	4.6381e-21	5	otk
beat-Vc	3.51936e-25	0.838977	0.505	0.13	4.90353e-21	5	beat-Vc
beat-Va	4.40494e-25	0.823593	0.505	0.136	6.1374e-21	5	beat-Va
CG423401	6.51472e-24	0.811692	0.923	0.587	9.07696e-20	5	CG42340
tld	7.95968e-24	0.638239	0.319	0.052	1.10902e-19	5	tld
CG4341	1.77456e-23	0.947253	0.56	0.177	2.47249e-19	5	CG4341
scrt1	1.46297e-22	0.753916	0.967	0.825	2.03835e-18	5	scrt
sm1	3.34758e-22	0.6029	0.989	0.834	4.66419e-18	5	sm
Rbfox1	4.04476e-22	0.467755	0.989	0.986	5.63556e-18	5	Rbfox1
eEF5	5.7958e-22	0.47114	0.978	0.983	8.07529e-18	5	eEF5
CG301721	9.74035e-22	0.653947	0.978	0.779	1.35712e-17	5	CG30172
beat-Vb	1.76109e-21	0.736711	0.473	0.13	2.45373e-17	5	beat-Vb
sif	2.26706e-21	0.853487	0.835	0.555	3.15869e-17	5	sif
Df311	2.36553e-21	0.438663	0.989	0.977	3.29589e-17	5	Df31
Chd64	2.49982e-21	0.543924	0.319	0.059	3.483e-17	5	Chd64
Trim9	2.52273e-21	0.678244	0.462	0.122	3.51492e-17	5	Trim9
KrT95D1	1.21058e-20	0.828222	0.857	0.619	1.6867e-16	5	KrT95D
CG331431	2.68863e-20	0.766984	0.604	0.203	3.74607e-16	5	CG33143
dpr61	2.9549e-20	1.01614	0.681	0.3	4.11706e-16	5	dpr6
CG11317	3.68379e-20	0.800539	0.495	0.146	5.13262e-16	5	CG11317
Drak	7.55305e-20	0.758219	0.725	0.355	1.05237e-15	5	Drak
AstC-R21	8.27826e-20	0.783445	0.538	0.177	1.15341e-15	5	AstC-R2
CG31323	1.20412e-19	0.582372	0.308	0.061	1.6777e-15	5	CG31323
RpL391	2.39832e-19	0.51356	0.956	0.94	3.34158e-15	5	RpL39
RpL23	3.51044e-19	0.41353	0.989	0.989	4.8911e-15	5	RpL23
bol1	4.01373e-19	0.83305	0.89	0.638	5.59233e-15	5	bol
Hr4	5.23218e-19	0.696746	0.945	0.906	7.29e-15	5	Hr4
noc	5.98492e-19	0.774869	0.484	0.148	8.33879e-15	5	noc
fra	6.1349e-19	0.622243	0.385	0.098	8.54775e-15	5	fra
CG126051	6.1563e-19	0.656066	0.901	0.609	8.57757e-15	5	CG12605
Rbp91	2.548e-18	0.636897	0.934	0.662	3.55012e-14	5	Rbp9
CG136851	4.68878e-18	0.962247	0.725	0.414	6.53288e-14	5	CG13685
awd	6.15227e-18	0.619489	0.934	0.664	8.57196e-14	5	awd
Syx1A	3.10925e-17	0.442469	0.978	0.93	4.33212e-13	5	Syx1A
rst	3.47201e-17	0.631273	0.33	0.078	4.83755e-13	5	rst
nAChRalpha51	4.03562e-17	0.415488	1	0.99	5.62283e-13	5	nAChRalpha5
RpS21	4.8152e-17	0.443673	0.978	0.968	6.70902e-13	5	RpS21
E2f11	4.9986e-17	0.754898	0.582	0.245	6.96454e-13	5	E2f1
5-HT1A2	7.82513e-17	0.683951	0.813	0.373	1.09028e-12	5	5-HT1A
COX7C	1.72992e-16	0.548687	0.967	0.878	2.41029e-12	5	COX7C
ATPsynC	2.97488e-16	0.405973	0.978	0.988	4.14489e-12	5	ATPsynC
Nlg4	7.61596e-16	0.683796	0.582	0.25	1.06113e-11	5	Nlg4
Spec2	1.57364e-15	0.609179	0.374	0.1	2.19255e-11	5	Spec2
mnb	1.59617e-15	0.600362	0.945	0.795	2.22395e-11	5	mnb
CG14086	1.77129e-15	0.451415	0.253	0.048	2.46795e-11	5	CG14086
qvr	1.93756e-15	0.550968	0.934	0.813	2.6996e-11	5	qvr
Snoo	2.15549e-15	0.766798	0.714	0.398	3.00325e-11	5	Snoo
RpS12	5.2182e-15	0.378252	0.956	0.969	7.27052e-11	5	RpS12
janA	1.44746e-14	0.545548	0.527	0.208	2.01674e-10	5	janA
msi1	1.68155e-14	0.726455	0.67	0.286	2.34291e-10	5	msi
hwt1	1.83285e-14	0.676146	0.824	0.532	2.55371e-10	5	hwt
CG34383	1.94662e-14	0.650525	0.835	0.584	2.71222e-10	5	CG34383
Calr1	5.08035e-14	0.580304	0.846	0.502	7.07846e-10	5	Calr
CG3638	5.78351e-14	0.622773	0.802	0.518	8.05817e-10	5	CG3638
trx	6.14012e-14	0.564963	0.879	0.686	8.55503e-10	5	trx
Glut1	1.24169e-13	0.656665	0.78	0.455	1.73005e-09	5	Glut1
RpLP21	1.36148e-13	0.330169	0.989	0.977	1.89696e-09	5	RpLP2
CG1688	2.08144e-13	0.655883	0.484	0.184	2.90007e-09	5	CG1688
alphaSnap	2.31414e-13	0.524218	0.934	0.737	3.22429e-09	5	alphaSnap
fne1	2.39877e-13	0.27973	0.989	0.983	3.34221e-09	5	fne
CanB21	3.01609e-13	0.563885	0.846	0.514	4.20233e-09	5	CanB2
CG9705	3.61473e-13	0.57938	0.363	0.115	5.03641e-09	5	CG9705
CG172701	6.4435e-13	0.623834	0.725	0.419	8.97773e-09	5	CG17270
CG77811	7.32895e-13	0.438226	0.967	0.91	1.02114e-08	5	CG7781
trn1	1.08777e-12	0.572857	0.527	0.217	1.51559e-08	5	trn
Myo81F1	1.11984e-12	0.667709	0.802	0.521	1.56027e-08	5	Myo81F
kug1	1.7849e-12	0.566972	0.473	0.185	2.4869e-08	5	kug
plum	2.15186e-12	0.555405	0.308	0.088	2.99818e-08	5	plum
CG4467	2.57358e-12	0.651031	0.769	0.512	3.58577e-08	5	CG4467
drl1	3.05215e-12	0.659274	0.56	0.256	4.25257e-08	5	drl
CG32333	3.41433e-12	0.624712	0.659	0.358	4.75718e-08	5	CG32333
CG79911	3.6592e-12	0.661944	0.747	0.464	5.09837e-08	5	CG7991
Atpalpha	4.20085e-12	0.2852	1	0.994	5.85305e-08	5	Atpalpha
fax	5.18871e-12	0.275451	1	0.99	7.22943e-08	5	fax
RpS2	8.36301e-12	0.266074	0.978	0.988	1.16522e-07	5	RpS2
CG113601	9.99656e-12	0.572435	0.868	0.639	1.39282e-07	5	CG11360
His3.3B	1.00471e-11	0.329272	1	0.974	1.39987e-07	5	His3.3B
fabp	1.57666e-11	0.433504	0.879	0.518	2.19677e-07	5	fabp
Hrb27C	3.08709e-11	0.364304	0.978	0.943	4.30124e-07	5	Hrb27C
caps	3.72274e-11	0.570244	0.659	0.353	5.1869e-07	5	caps
MESK2	5.2772e-11	0.475013	0.901	0.759	7.35272e-07	5	MESK2
GlcAT-S	5.48791e-11	0.526757	0.374	0.138	7.64631e-07	5	GlcAT-S
Teh11	1.26117e-10	0.606873	0.549	0.272	1.75719e-06	5	Teh1
Dscam1	1.46145e-10	0.525962	0.813	0.589	2.03623e-06	5	Dscam1
Nckx30C1	1.83672e-10	0.426921	0.923	0.744	2.55911e-06	5	Nckx30C
CG32206	2.56631e-10	0.590151	0.714	0.481	3.57564e-06	5	CG32206
CG59461	2.75681e-10	0.530358	0.538	0.268	3.84106e-06	5	CG5946
CG110001	2.7621e-10	0.629383	0.538	0.268	3.84843e-06	5	CG11000
RpS16	3.23437e-10	0.304291	0.967	0.967	4.50644e-06	5	RpS16
sca1	3.24959e-10	0.62157	0.648	0.38	4.52765e-06	5	sca
CG32052	3.43119e-10	0.504139	0.275	0.088	4.78068e-06	5	CG32052
Cad87A1	4.35805e-10	0.548859	0.319	0.117	6.07207e-06	5	Cad87A
glec	4.35984e-10	0.510216	0.714	0.406	6.07457e-06	5	glec
CG44837	5.86662e-10	0.551223	0.385	0.158	8.17396e-06	5	CG44837
Dop1R21	6.54483e-10	0.518036	0.846	0.674	9.11891e-06	5	Dop1R2
Cdep	6.60745e-10	0.509059	0.879	0.631	9.20615e-06	5	Cdep
RpLP0	8.6333e-10	0.296116	0.945	0.951	1.20288e-05	5	RpLP0
HnRNP-K	8.6552e-10	0.577317	0.725	0.499	1.20593e-05	5	HnRNP-K
CASK	9.73637e-10	0.469586	0.912	0.768	1.35657e-05	5	CASK
ena	1.52054e-09	0.527412	0.703	0.462	2.11856e-05	5	ena
Act42A1	2.06676e-09	0.461542	0.813	0.58	2.87961e-05	5	Act42A
levy	2.25729e-09	0.456551	0.967	0.898	3.14508e-05	5	levy
elB	2.45278e-09	0.522784	0.495	0.242	3.41746e-05	5	elB
Argk	2.69794e-09	0.420545	0.923	0.744	3.75904e-05	5	Argk
14-3-3epsilon1	3.50895e-09	0.283875	0.989	0.975	4.88902e-05	5	14-3-3epsilon
Snap251	4.05277e-09	0.433513	0.89	0.799	5.64672e-05	5	Snap25
snRNA:7SK	4.38679e-09	0.463576	0.835	0.72	6.11212e-05	5	snRNA:7SK
spoon	4.67137e-09	0.560117	0.429	0.201	6.50862e-05	5	spoon
nAChRalpha1	7.5132e-09	0.418534	0.912	0.766	0.000104681	5	nAChRalpha1
U4-U6-60K	9.95563e-09	0.575472	0.407	0.191	0.000138712	5	U4-U6-60K
ATPsynG	1.31839e-08	0.317325	0.956	0.941	0.000183691	5	ATPsynG
RpL40	1.37654e-08	0.252368	0.967	0.987	0.000191793	5	RpL40
RpL41	1.55229e-08	0.290499	0.978	0.946	0.000216281	5	RpL4
gpp	1.73223e-08	0.435096	0.857	0.688	0.000241352	5	gpp
Su(var)205	1.76755e-08	0.450311	0.758	0.53	0.000246272	5	Su(var)205
Sec61beta1	2.51555e-08	0.424859	0.725	0.522	0.000350491	5	Sec61beta
blw	2.5172e-08	0.357721	0.967	0.898	0.000350722	5	blw
cdc14	5.88025e-08	0.460648	0.758	0.601	0.000819295	5	cdc14
CG41011	6.32692e-08	0.445327	0.67	0.43	0.000881529	5	CG4101
CG31637	6.69895e-08	0.546297	0.484	0.263	0.000933365	5	CG31637
Prx3	7.31319e-08	0.434949	0.582	0.331	0.00101895	5	Prx3
RpL30	7.50609e-08	0.293072	0.945	0.916	0.00104582	5	RpL30
CG423891	8.32172e-08	0.565006	0.659	0.506	0.00115946	5	CG42389
fz2	8.9766e-08	0.588624	0.681	0.461	0.00125071	5	fz2
eIF4E11	9.20073e-08	0.449018	0.802	0.617	0.00128194	5	eIF4E1
Syn11	9.50669e-08	0.486997	0.725	0.511	0.00132457	5	Syn1
CG7630	1.02038e-07	0.345017	0.989	0.921	0.00142169	5	CG7630
Tsp42Ee	1.25482e-07	0.502652	0.473	0.251	0.00174835	5	Tsp42Ee
Sxl	1.30603e-07	0.381681	0.857	0.722	0.00181969	5	Sxl
Oct-TyrR	1.97929e-07	0.567889	0.593	0.382	0.00275774	5	Oct-TyrR
RpS7	2.3381e-07	0.253748	0.989	0.991	0.00325768	5	RpS7
AGO1	2.46664e-07	0.34887	0.879	0.849	0.00343677	5	AGO1
COX4	2.96327e-07	0.285056	0.967	0.966	0.00412872	5	COX4
Frl	3.74963e-07	0.372883	0.846	0.623	0.00522436	5	Frl
UQCR-Q1	3.95947e-07	0.38654	0.912	0.782	0.00551673	5	UQCR-Q
FucTA	4.35243e-07	0.440403	0.352	0.16	0.00606424	5	FucTA
stan	6.38773e-07	0.387811	0.253	0.097	0.00890003	5	stan
Hsp27	7.52305e-07	0.449074	0.44	0.214	0.0104819	5	Hsp27
l(1)G0255	8.41073e-07	0.450325	0.538	0.316	0.0117187	5	l(1)G0255
CG34401	8.79153e-07	0.337215	0.901	0.751	0.0122492	5	CG34401
CG422651	9.61313e-07	0.376655	0.736	0.472	0.013394	5	CG42265
sn	1.02105e-06	0.414939	0.385	0.192	0.0142263	5	sn
PPP4R2r	1.03396e-06	0.451268	0.571	0.346	0.0144061	5	PPP4R2r
CG1090	1.09998e-06	0.43366	0.571	0.355	0.015326	5	CG1090
eEF1alpha11	1.1606e-06	0.436605	0.527	0.303	0.0161707	5	eEF1alpha1
CG18208	1.22966e-06	0.346871	0.923	0.852	0.0171329	5	CG18208
Ras85D	1.32978e-06	0.457129	0.615	0.427	0.0185278	5	Ras85D
beat-VI	1.41704e-06	0.504477	0.352	0.165	0.0197436	5	beat-VI
Syx6	1.53669e-06	0.42613	0.451	0.245	0.0214107	5	Syx6
ATPsyndelta	2.10619e-06	0.362969	0.89	0.72	0.0293456	5	ATPsyndelta
CG32809	2.42097e-06	0.465269	0.659	0.456	0.0337313	5	CG32809
crp1	2.73082e-06	0.46162	0.681	0.457	0.0380485	5	crp
eIF4EHP1	2.93974e-06	0.458787	0.835	0.593	0.0409594	5	eIF4EHP
Prosbeta3	3.13511e-06	0.478553	0.505	0.309	0.0436814	5	Prosbeta3
pnut	3.22688e-06	0.398081	0.637	0.458	0.0449601	5	pnut
Trpgamma	4.12743e-06	0.404361	0.253	0.105	0.0575074	5	Trpgamma
ND-B14.5B	4.94558e-06	0.362567	0.659	0.457	0.0689068	5	ND-B14.5B
CG147151	5.40186e-06	0.406145	0.319	0.155	0.0752642	5	CG14715
chic	5.92107e-06	0.327463	0.879	0.698	0.0824983	5	chic
COX5A	5.97531e-06	0.287058	0.967	0.865	0.083254	5	COX5A
Actbeta	8.74005e-06	0.346856	0.527	0.334	0.121775	5	Actbeta
CG43347	9.04023e-06	0.391674	0.637	0.473	0.125958	5	CG43347
cic	9.26977e-06	0.350619	0.857	0.67	0.129156	5	cic
Sik21	9.6869e-06	0.477494	0.396	0.225	0.134968	5	Sik2
vimar	9.77597e-06	0.355765	0.253	0.105	0.136209	5	vimar
csw1	1.02905e-05	0.380292	0.747	0.536	0.143377	5	csw
CG42724	1.05042e-05	0.410735	0.418	0.244	0.146355	5	CG42724
COX8	1.06524e-05	0.323736	0.89	0.873	0.14842	5	COX8
CG30122	1.18777e-05	0.357691	0.516	0.313	0.165492	5	CG30122
ox	1.39292e-05	0.413539	0.725	0.563	0.194075	5	ox
Sod2	1.43576e-05	0.308713	0.648	0.428	0.200045	5	Sod2
VAChT1	1.44342e-05	0.307749	0.835	0.637	0.201111	5	VAChT
nAChRalpha61	1.45859e-05	0.287652	0.989	0.906	0.203226	5	nAChRalpha6
ths1	1.47011e-05	0.349293	0.308	0.156	0.204831	5	ths
Fili1	1.47227e-05	0.362994	0.264	0.115	0.205131	5	Fili
CG450491	1.5047e-05	0.296018	0.967	0.876	0.20965	5	CG45049
CNBP	1.52028e-05	0.398332	0.692	0.489	0.211821	5	CNBP
arm	1.55976e-05	0.349291	0.78	0.589	0.217321	5	arm
tai	2.0362e-05	0.376116	0.681	0.509	0.283704	5	tai
gek	2.04833e-05	0.304701	0.253	0.109	0.285394	5	gek
Ald1	2.63195e-05	0.439402	0.44	0.242	0.36671	5	Ald
Hsc70-31	2.66753e-05	0.448016	0.582	0.411	0.371666	5	Hsc70-3
Toll-61	2.83307e-05	0.378936	0.758	0.605	0.394731	5	Toll-6
homer	2.89124e-05	0.379862	0.319	0.168	0.402836	5	homer
ND-PDSW	2.96997e-05	0.262225	0.835	0.662	0.413806	5	ND-PDSW
su(w[a])1	3.18163e-05	0.349087	0.44	0.258	0.443297	5	su(w[a])
Nmdar2	3.43886e-05	0.425701	0.451	0.258	0.479136	5	Nmdar2
RpS24	4.11142e-05	0.272782	0.912	0.885	0.572844	5	RpS24
ND-24	4.30389e-05	0.373184	0.516	0.339	0.599661	5	ND-24
cib	4.34817e-05	0.340331	0.549	0.364	0.605831	5	cib
robo1	4.37115e-05	0.334386	0.374	0.206	0.609033	5	robo1
CG12991	4.53191e-05	0.368993	0.505	0.337	0.631431	5	CG12991
Gp93	5.24573e-05	0.381808	0.407	0.243	0.730887	5	Gp93
CG139371	5.25749e-05	0.408909	0.396	0.233	0.732526	5	CG13937
rdo1	5.51927e-05	0.277882	0.341	0.181	0.769	5	rdo
Pp1alpha-96A1	5.8742e-05	0.282044	0.791	0.589	0.818453	5	Pp1alpha-96A
cdi	6.82017e-05	0.369405	0.67	0.506	0.950254	5	cdi
CG8500	6.96579e-05	0.405624	0.484	0.335	0.970543	5	CG8500
eIF4H1	7.17469e-05	0.393381	0.615	0.428	0.99965	5	eIF4H1
CG42524	7.30122e-05	0.308425	0.275	0.136	1	5	CG42524
SmD1	8.73283e-05	0.32148	0.319	0.175	1	5	SmD1
Rsf11	8.78246e-05	0.27487	0.879	0.819	1	5	Rsf1
phyl2	9.52897e-05	0.293011	0.692	0.514	1	5	phyl
l(3)neo381	0.000103067	0.350672	0.549	0.355	1	5	l(3)neo38
Sod11	0.000106368	0.290886	0.89	0.753	1	5	Sod1
g	0.000109635	0.387575	0.33	0.184	1	5	g
mEFTs	0.000113206	0.372441	0.286	0.151	1	5	mEFTs
CG327721	0.000116313	0.314842	0.505	0.326	1	5	CG32772
CG5676	0.000116396	0.285247	0.857	0.708	1	5	CG5676
CR44922	0.000129288	0.322934	0.341	0.192	1	5	CR44922
Fim	0.00013476	0.410693	0.418	0.258	1	5	Fim
CG2258	0.000144345	0.398983	0.374	0.217	1	5	CG2258
CR45758	0.000156771	0.46554	0.615	0.476	1	5	CR45758
cindr	0.000164662	0.356202	0.681	0.526	1	5	cindr
ERp60	0.000182654	0.378349	0.385	0.233	1	5	ERp60
dtn	0.000185524	0.290882	0.758	0.551	1	5	dtn
CG13220	0.000191895	0.324675	0.363	0.209	1	5	CG13220
CG14883	0.000192429	0.318383	0.297	0.16	1	5	CG14883
ND-B15	0.000206574	0.301603	0.758	0.627	1	5	ND-B15
sns1	0.000209239	0.274737	0.253	0.128	1	5	sns
CG5522	0.000233851	0.300611	0.286	0.154	1	5	CG5522
Trp11	0.000254094	0.289723	0.736	0.548	1	5	Trp1
Tlk	0.000296259	0.293873	0.736	0.661	1	5	Tlk
CG2862	0.000313302	0.33067	0.516	0.344	1	5	CG2862
Lpin	0.000341455	0.292639	0.473	0.3	1	5	Lpin
cathD	0.00034896	0.286339	0.385	0.235	1	5	cathD
CG4300	0.000351646	0.358267	0.308	0.179	1	5	CG4300
eIF2gamma	0.000356055	0.382061	0.33	0.201	1	5	eIF2gamma
CG402281	0.000392005	0.325064	0.714	0.562	1	5	CG40228
CG33181	0.000408447	0.331989	0.56	0.396	1	5	CG33181
Aps	0.000468318	0.398597	0.549	0.417	1	5	Aps
px	0.000481928	0.260993	0.813	0.675	1	5	px
nocte	0.000484713	0.272374	0.89	0.777	1	5	nocte
Hel25E	0.000490979	0.350322	0.484	0.353	1	5	Hel25E
ND-20	0.000496488	0.302898	0.67	0.52	1	5	ND-20
Sfxn2	0.000502612	0.253192	0.297	0.166	1	5	Sfxn2
CG13887	0.000506664	0.28072	0.637	0.496	1	5	CG13887
zip1	0.000519212	0.318666	0.473	0.314	1	5	zip
RhoGAP100F	0.000539204	0.255038	0.879	0.862	1	5	RhoGAP100F
Cyt-c1	0.00055919	0.351729	0.67	0.542	1	5	Cyt-c1
CG7971	0.000591936	0.281999	0.923	0.863	1	5	CG7971
CG58901	0.000597579	0.324498	0.736	0.656	1	5	CG5890
drongo	0.000616869	0.271281	0.308	0.172	1	5	drongo
Non2	0.000635888	0.372424	0.571	0.408	1	5	Non2
ChAT	0.000637604	0.266282	0.484	0.305	1	5	ChAT
hth	0.00073706	0.309645	0.582	0.411	1	5	hth
CG11638	0.00077633	0.404602	0.253	0.146	1	5	CG11638
Adar1	0.000886319	0.351004	0.462	0.331	1	5	Adar
ND-MWFE	0.000924875	0.355566	0.615	0.49	1	5	ND-MWFE
C1GalTA	0.000944475	0.305011	0.396	0.266	1	5	C1GalTA
CG31694	0.0010376	0.275707	0.527	0.375	1	5	CG31694
MED7	0.00106671	0.301736	0.527	0.377	1	5	MED7
CG108031	0.00112328	0.326995	0.352	0.222	1	5	CG10803
FKBP591	0.00113055	0.257404	0.473	0.316	1	5	FKBP59
DAAM	0.00121593	0.265535	0.297	0.174	1	5	DAAM
CG133001	0.00125588	0.258115	0.319	0.189	1	5	CG13300
CG11267	0.00128777	0.280215	0.692	0.573	1	5	CG11267
bin3	0.00133809	0.303146	0.571	0.429	1	5	bin3
Mid11	0.00138646	0.341692	0.769	0.662	1	5	Mid1
CG35561	0.00140966	0.316245	0.495	0.35	1	5	CG3556
gogo1	0.00148344	0.325001	0.385	0.235	1	5	gogo
CG180811	0.00154671	0.25123	0.396	0.26	1	5	CG18081
l(3)05822	0.00157544	0.268705	0.308	0.185	1	5	l(3)05822
EndoB1	0.00157675	0.440634	0.418	0.313	1	5	EndoB
Nrt	0.00167886	0.307387	0.505	0.363	1	5	Nrt
Snx3	0.00193645	0.353434	0.418	0.295	1	5	Snx3
Ubr3	0.00201529	0.253782	0.758	0.61	1	5	Ubr3
Tspo	0.00212648	0.326009	0.297	0.189	1	5	Tspo
Shaw	0.00221674	0.253971	0.593	0.458	1	5	Shaw
CG341361	0.00231984	0.254939	0.363	0.233	1	5	CG34136
Nipsnap	0.00252512	0.252485	0.429	0.293	1	5	Nipsnap
CG17065	0.00265862	0.312215	0.56	0.477	1	5	CG17065
Ptpmeg2	0.00283449	0.315852	0.637	0.528	1	5	Ptpmeg2
CG9662	0.00287888	0.301073	0.319	0.204	1	5	CG9662
msn	0.0029225	0.293592	0.462	0.329	1	5	msn
Nurf-38	0.00295755	0.333037	0.484	0.377	1	5	Nurf-38
wech	0.00309882	0.312249	0.495	0.372	1	5	wech
CG13293	0.00343363	0.352024	0.505	0.406	1	5	CG13293
Lam	0.00358333	0.284262	0.407	0.284	1	5	Lam
SLO21	0.00393755	0.329198	0.648	0.514	1	5	SLO2
yrt	0.00395771	0.272935	0.462	0.325	1	5	yrt
CG103841	0.00399977	0.290918	0.593	0.462	1	5	CG10384
Arpc3A	0.00400172	0.282684	0.396	0.274	1	5	Arpc3A
nonA	0.00409106	0.289948	0.56	0.462	1	5	nonA
Nipped-A	0.00417008	0.313468	0.484	0.353	1	5	Nipped-A
Mad	0.00454559	0.315675	0.352	0.237	1	5	Mad
Sc2	0.00502558	0.297357	0.286	0.188	1	5	Sc2
CG150971	0.00521692	0.303645	0.319	0.213	1	5	CG15097
Map205	0.00536601	0.28616	0.363	0.254	1	5	Map205
Nmdar1	0.00562511	0.267634	0.264	0.163	1	5	Nmdar1
CG12054	0.00599916	0.285885	0.681	0.542	1	5	CG12054
CG1307	0.00600212	0.282318	0.44	0.323	1	5	CG1307
NKAIN	0.00620415	0.264706	0.297	0.195	1	5	NKAIN
Nph	0.00746308	0.332006	0.286	0.189	1	5	Nph
l(1)G0334	0.00760107	0.284129	0.385	0.272	1	5	l(1)G0334
SppL	0.00815856	0.25093	0.516	0.394	1	5	SppL
CG5554	0.00831842	0.279513	0.363	0.26	1	5	CG5554
eIF2alpha	0.00849354	0.26129	0.396	0.286	1	5	eIF2alpha
Paf-AHalpha	0.00883242	0.257719	0.308	0.199	1	5	Paf-AHalpha
S	0.00889123	0.351079	0.385	0.278	1	5	S
KdelR1	0.00947016	0.33095	0.582	0.492	1	5	KdelR
Mtch	0.00949757	0.360718	0.374	0.276	1	5	Mtch
CG1636	0.00954972	0.283856	0.286	0.191	1	5	CG1636
CG7946	0.00972546	0.268487	0.264	0.172	1	5	CG7946
CG14459	2.10526e-37	1.16454	0.345	0.035	2.93326e-33	6	CG14459
CG43689	1.7346e-34	1.35279	0.264	0.021	2.41682e-30	6	CG43689
ap1	6.94263e-33	0.65575	0.575	0.112	9.67317e-29	6	ap
klg2	1.28006e-26	1.13318	0.977	0.589	1.7835e-22	6	klg
side1	2.80378e-26	0.952224	0.655	0.193	3.9065e-22	6	side
nolo1	1.95668e-23	0.552363	0.621	0.163	2.72624e-19	6	nolo
CG331432	2.86921e-22	0.634124	0.655	0.201	3.99767e-18	6	CG33143
CG444221	3.20337e-20	0.570409	0.655	0.209	4.46326e-16	6	CG44422
dpr151	3.7369e-18	0.355854	0.448	0.109	5.20662e-14	6	dpr15
dpr11	6.42011e-18	0.475793	0.46	0.12	8.94514e-14	6	dpr11
Ace1	1.02495e-16	0.604734	0.77	0.314	1.42807e-12	6	Ace
fz21	1.65082e-16	0.889039	0.885	0.45	2.30009e-12	6	fz2
CG135942	2.17714e-16	0.437702	0.552	0.177	3.03342e-12	6	CG13594
Hsp271	1.29787e-14	0.459843	0.598	0.205	1.80832e-10	6	Hsp27
Octbeta2R	2.57464e-14	0.679172	0.724	0.333	3.58724e-10	6	Octbeta2R
Fas32	7.31703e-14	0.751032	0.77	0.362	1.01948e-09	6	Fas3
Trpm2	7.7667e-14	0.44792	0.713	0.284	1.08213e-09	6	Trpm
Kank	9.5509e-14	0.423285	0.391	0.112	1.33073e-09	6	Kank
DIP-gamma	1.12951e-13	0.395145	0.483	0.154	1.57375e-09	6	DIP-gamma
CG4829	1.62992e-13	0.395799	0.264	0.056	2.27097e-09	6	CG4829
Teh12	3.74639e-13	0.453578	0.667	0.266	5.21985e-09	6	Teh1
CG30419	9.97534e-13	0.295275	0.31	0.079	1.38986e-08	6	CG30419
CG46301	1.01523e-12	0.362975	0.667	0.259	1.41452e-08	6	CG46301
Rh7	1.42464e-12	0.411521	0.333	0.093	1.98495e-08	6	Rh7
Ten-m2	2.42709e-12	0.641174	0.713	0.334	3.38166e-08	6	Ten-m
CG425941	2.667e-12	0.471446	0.46	0.157	3.71593e-08	6	CG42594
luna1	2.78457e-12	0.427516	0.701	0.296	3.87974e-08	6	luna
otk1	2.88266e-12	0.279591	0.667	0.254	4.01642e-08	6	otk
smal1	3.02295e-12	0.503643	0.425	0.14	4.21187e-08	6	smal
nkd1	3.47183e-12	0.400873	0.644	0.258	4.8373e-08	6	nkd
SP23531	3.55262e-12	0.403429	0.701	0.308	4.94986e-08	6	SP2353
beat-IIIb	3.55818e-12	0.337645	0.655	0.248	4.95761e-08	6	beat-IIIb
CG177161	5.31548e-12	0.304244	0.609	0.226	7.40606e-08	6	CG17716
plum1	5.51748e-12	0.334407	0.322	0.087	7.68751e-08	6	plum
fra1	1.1454e-11	0.347498	0.345	0.101	1.59589e-07	6	fra
Pxn	1.71266e-11	0.501926	0.828	0.456	2.38625e-07	6	Pxn
CR44978	3.37351e-11	0.347058	0.253	0.063	4.70032e-07	6	CR44978
msi2	3.42015e-11	0.448401	0.655	0.288	4.76529e-07	6	msi
TyrR	3.59772e-11	0.311338	0.379	0.117	5.0127e-07	6	TyrR
CG30089	4.50692e-11	0.305468	0.552	0.197	6.2795e-07	6	CG30089
Taf12	4.80446e-11	0.342331	0.747	0.318	6.69406e-07	6	Taf12
CG341362	5.25939e-11	0.460769	0.54	0.223	7.32791e-07	6	CG34136
Cont	5.88991e-11	0.263882	0.287	0.077	8.20642e-07	6	Cont
fne2	6.56431e-11	0.299073	1	0.983	9.14605e-07	6	fne
fabp1	8.99362e-11	0.486739	0.92	0.517	1.25308e-06	6	fabp
Dscam21	1.0294e-10	0.481631	0.977	0.887	1.43426e-06	6	Dscam2
eEF1alpha12	1.0356e-10	0.318291	0.701	0.294	1.4429e-06	6	eEF1alpha1
beat-VI1	1.12609e-10	0.465094	0.437	0.16	1.56898e-06	6	beat-VI
app1	1.56261e-10	0.278251	0.414	0.136	2.17718e-06	6	app
CG424922	1.62346e-10	0.302083	0.977	0.955	2.26196e-06	6	CG42492
18w	1.97583e-10	0.254822	0.529	0.19	2.75292e-06	6	18w
aop	1.9909e-10	0.449867	0.644	0.284	2.77392e-06	6	aop
kirre1	2.00141e-10	0.315668	0.575	0.223	2.78856e-06	6	kirre
Tsp66E2	2.41858e-10	0.417121	0.701	0.317	3.36981e-06	6	Tsp66E
Trim91	2.62039e-10	0.365386	0.379	0.128	3.65099e-06	6	Trim9
CG124841	2.65619e-10	0.290951	0.31	0.093	3.70087e-06	6	CG12484
Myo81F2	2.68505e-10	0.477468	0.92	0.515	3.74108e-06	6	Myo81F
Hsp67Ba1	2.8909e-10	0.345156	0.621	0.26	4.02789e-06	6	Hsp67Ba
sns2	4.48511e-10	0.314744	0.368	0.122	6.24911e-06	6	sns
CG110002	5.51313e-10	0.318713	0.632	0.264	7.68144e-06	6	CG11000
beat-IIIc2	6.12859e-10	0.316007	0.414	0.148	8.53896e-06	6	beat-IIIc
nAChRalpha31	6.67167e-10	0.376175	0.379	0.131	9.29564e-06	6	nAChRalpha3
CG4577	7.52524e-10	0.310071	0.471	0.178	1.04849e-05	6	CG4577
CG4168	8.84568e-10	0.318955	0.264	0.075	1.23247e-05	6	CG4168
Epac	9.38048e-10	0.415752	0.448	0.173	1.30698e-05	6	Epac
Syp1	1.18052e-09	0.318038	0.874	0.547	1.64481e-05	6	Syp
sm2	1.29491e-09	0.424296	1	0.834	1.80419e-05	6	sm
jim2	1.37545e-09	0.536104	0.977	0.88	1.91642e-05	6	jim
CG448371	1.63799e-09	0.264653	0.425	0.156	2.28221e-05	6	CG44837
Rbp92	1.99125e-09	0.379845	0.954	0.661	2.77441e-05	6	Rbp9
CG329821	2.23635e-09	0.366013	0.345	0.117	3.11591e-05	6	CG32982
Idh1	3.53319e-09	0.269471	0.471	0.181	4.92279e-05	6	Idh
Cbp53E1	4.97693e-09	0.471145	0.529	0.238	6.93435e-05	6	Cbp53E
Hsromega2	6.65523e-09	0.348639	1	0.973	9.27274e-05	6	Hsromega
kek22	7.45595e-09	0.627807	0.598	0.283	0.000103884	6	kek2
dpr5	9.95092e-09	0.335558	0.655	0.296	0.000138646	6	dpr5
Hsp231	1.16017e-08	0.278914	0.805	0.416	0.000161647	6	Hsp23
Pde61	1.67602e-08	0.586525	0.701	0.392	0.000233519	6	Pde6
kek61	2.16975e-08	0.325582	0.701	0.327	0.000302311	6	kek6
Syn12	2.19648e-08	0.397245	0.828	0.506	0.000306035	6	Syn1
alphaTub84B	2.5592e-08	0.316014	1	0.931	0.000356574	6	alphaTub84B
CG343711	3.61319e-08	0.366938	0.494	0.219	0.000503426	6	CG34371
beat-Vc1	3.90193e-08	0.35483	0.368	0.139	0.000543657	6	beat-Vc
Nlg41	4.5731e-08	0.333492	0.563	0.252	0.00063717	6	Nlg4
CR457581	4.75318e-08	0.438457	0.759	0.468	0.000662261	6	CR45758
CanB22	5.51825e-08	0.331423	0.885	0.512	0.000768857	6	CanB2
Argk1	5.6763e-08	0.323758	0.977	0.741	0.000790879	6	Argk
Ggamma30A	5.80198e-08	0.254757	1	0.997	0.00080839	6	Ggamma30A
Rtnl11	5.99465e-08	0.280055	1	0.921	0.000835235	6	Rtnl1
cib1	6.51708e-08	0.352531	0.724	0.354	0.000908024	6	cib
Calr2	7.56174e-08	0.280222	0.885	0.501	0.00105358	6	Calr
CG437781	1.06318e-07	0.341444	0.402	0.172	0.00148133	6	CG43778
Nlp	1.20862e-07	0.25324	0.713	0.336	0.00168397	6	Nlp
Con1	1.27961e-07	0.594931	0.747	0.475	0.00178288	6	Con
CG318141	1.38588e-07	0.373333	0.333	0.126	0.00193095	6	CG31814
bi1	1.41713e-07	0.853978	0.299	0.116	0.00197448	6	bi
Ptp99A1	1.5659e-07	0.437439	0.908	0.744	0.00218177	6	Ptp99A
CR453122	2.20154e-07	0.263306	0.586	0.279	0.00306741	6	CR45312
Msp3001	2.66361e-07	0.367669	0.931	0.634	0.00371121	6	Msp300
Sf3b6	2.77999e-07	0.364315	0.862	0.515	0.00387335	6	Sf3b6
klar1	2.89999e-07	0.345118	0.92	0.633	0.00404056	6	klar
Act42A2	3.26879e-07	0.318976	0.92	0.574	0.0045544	6	Act42A
GlcAT-S1	5.41866e-07	0.279783	0.345	0.141	0.00754983	6	GlcAT-S
CadN3	5.7944e-07	0.301507	0.874	0.552	0.00807334	6	CadN
CG431431	5.94942e-07	0.280497	0.724	0.372	0.00828933	6	CG43143
CG60241	6.55419e-07	0.299109	0.816	0.456	0.00913196	6	CG6024
Cow1	7.522e-07	0.297569	0.885	0.61	0.0104804	6	Cow
CG147152	7.82135e-07	0.265497	0.368	0.153	0.0108975	6	CG14715
CG172702	1.03867e-06	0.264034	0.77	0.418	0.0144718	6	CG17270
Neto1	1.24253e-06	0.261495	0.31	0.117	0.0173121	6	Neto
nrm	1.25159e-06	0.281913	0.874	0.547	0.0174383	6	nrm
Wdr62	1.26298e-06	0.345506	0.862	0.575	0.017597	6	Wdr62
Octbeta3R1	1.54362e-06	0.316176	0.586	0.284	0.0215073	6	Octbeta3R
CG32683	2.86391e-06	0.310834	0.529	0.26	0.0399028	6	CG32683
Nrt1	2.90689e-06	0.286656	0.655	0.355	0.0405018	6	Nrt
CG132201	3.10816e-06	0.307269	0.437	0.205	0.043306	6	CG13220
CG167911	3.14978e-06	0.321862	0.851	0.526	0.0438858	6	CG16791
corto	4.16456e-06	0.310437	0.874	0.577	0.0580248	6	corto
dpr20	4.53075e-06	0.278902	0.391	0.18	0.063127	6	dpr20
KrT95D2	5.31572e-06	0.295646	0.897	0.618	0.0740639	6	KrT95D
tsr1	5.38398e-06	0.286127	0.908	0.602	0.075015	6	tsr
stan1	6.26472e-06	0.29181	0.253	0.097	0.0872863	6	stan
hwt2	7.10782e-06	0.304082	0.874	0.53	0.0990333	6	hwt
Evi51	7.23466e-06	0.323422	0.885	0.661	0.100801	6	Evi5
Frq21	9.01437e-06	0.259953	0.816	0.492	0.125597	6	Frq2
Ca-alpha1T2	1.84677e-05	0.316263	0.494	0.27	0.257311	6	Ca-alpha1T
beat-Va1	2.51149e-05	0.25187	0.322	0.148	0.349926	6	beat-Va
CG139201	2.6132e-05	0.27177	0.977	0.878	0.364097	6	CG13920
trv2	2.6713e-05	0.391057	0.862	0.751	0.372192	6	trv
fru1	3.79789e-05	0.547751	0.989	0.905	0.52916	6	fru
lbk	7.00289e-05	0.270685	0.563	0.32	0.975713	6	lbk
CG34353	0.00016197	0.491893	0.816	0.628	1	6	CG34353
CG423402	0.000176059	0.302476	0.805	0.594	1	6	CG42340
CG103842	0.000217318	0.310962	0.667	0.458	1	6	CG10384
Shab2	0.000248037	0.258614	0.828	0.566	1	6	Shab
Rbp61	0.000313025	0.3273	0.989	0.928	1	6	Rbp6
rdgA2	0.000404052	0.318161	0.747	0.572	1	6	rdgA
5-HT1B1	0.000600323	0.25714	0.253	0.121	1	6	5-HT1B
Toll-62	0.000735233	0.345441	0.874	0.598	1	6	Toll-6
CG427501	0.00458941	0.370976	0.908	0.69	1	6	CG42750
SoxN1	4.68751e-104	1.61612	0.957	0.082	6.5311e-100	7	SoxN
CG98961	2.24252e-102	1.55897	0.913	0.074	3.1245e-98	7	CG9896
DIP-eta1	3.5774e-95	1.91362	1	0.111	4.98439e-91	7	DIP-eta
CG96501	2.90027e-87	1.7186	0.986	0.123	4.04095e-83	7	CG9650
scro1	7.42386e-76	1.1417	0.652	0.051	1.03437e-71	7	scro
beat-Ia1	3.10518e-66	1.54284	0.986	0.183	4.32644e-62	7	beat-Ia
beat-Ic2	2.66118e-60	1.44277	1	0.202	3.70783e-56	7	beat-Ic
CG439021	2.29173e-59	1.86179	0.986	0.239	3.19307e-55	7	CG43902
CG2911	3.48922e-59	0.655128	0.391	0.02	4.86153e-55	7	CG2911
pdm31	3.92326e-59	1.38687	0.942	0.174	5.46628e-55	7	pdm3
hbs1	3.96118e-58	1.07913	0.667	0.08	5.51911e-54	7	hbs
CG147951	7.18927e-58	1.01241	0.507	0.041	1.00168e-53	7	CG14795
dpr131	6.93357e-57	1.69604	1	0.239	9.66054e-53	7	dpr13
Sox102F1	2.71312e-56	0.972105	0.638	0.069	3.7802e-52	7	Sox102F
Pvf32	4.21472e-55	2.00265	1	0.288	5.87237e-51	7	Pvf3
glob11	1.3813e-52	1.11404	0.638	0.078	1.92456e-48	7	glob1
Hsp272	1.89225e-52	1.47371	0.899	0.196	2.63647e-48	7	Hsp27
Ptp10D1	3.53475e-46	1.363	0.957	0.273	4.92496e-42	7	Ptp10D
tok1	2.3569e-43	1.12886	0.812	0.181	3.28388e-39	7	tok
dpr14	1.1497e-42	2.10541	1	0.589	1.60188e-38	7	dpr1
HmgD1	1.56998e-42	1.45305	0.913	0.313	2.18745e-38	7	HmgD
CG316901	9.09245e-42	1.02112	0.696	0.123	1.26685e-37	7	CG31690
Syp2	1.25084e-41	1.62617	1	0.545	1.74279e-37	7	Syp
Ccn1	1.28919e-40	1.31982	0.884	0.249	1.79623e-36	7	Ccn
Tsp66E3	2.66046e-38	1.15572	0.986	0.309	3.70682e-34	7	Tsp66E
CG125942	3.36518e-38	1.14946	0.971	0.31	4.68871e-34	7	CG12594
CG436582	7.03421e-38	1.41624	1	0.562	9.80076e-34	7	CG43658
beat-Ib2	8.34947e-38	1.0788	0.841	0.202	1.16333e-33	7	beat-Ib
CG425401	3.08574e-37	1.56401	1	0.735	4.29936e-33	7	CG42540
cv-22	5.33301e-36	0.961274	0.696	0.141	7.43049e-32	7	cv-2
shep2	2.33262e-35	1.11473	1	0.97	3.25003e-31	7	shep
Hsp67Ba2	1.182e-34	1.08005	0.87	0.252	1.64688e-30	7	Hsp67Ba
Spec21	1.30872e-34	0.915273	0.565	0.095	1.82344e-30	7	Spec2
beat-Vb1	7.01214e-33	0.872171	0.623	0.129	9.77001e-29	7	beat-Vb
Spn1	1.29905e-32	0.914962	1	0.931	1.80997e-28	7	Spn
AstC-R22	2.61891e-32	0.927451	0.725	0.173	3.64892e-28	7	AstC-R2
dpr23	2.78203e-32	1.10044	0.681	0.165	3.87621e-28	7	dpr2
luna2	2.95426e-32	0.929701	0.942	0.289	4.11617e-28	7	luna
SKIP1	3.91049e-32	0.942406	0.783	0.199	5.44848e-28	7	SKIP
CG343771	7.27982e-32	0.657198	0.348	0.036	1.0143e-27	7	CG34377
spab1	8.11655e-32	1.14328	1	0.68	1.13088e-27	7	spab
cmpy1	3.42713e-30	0.874684	1	0.891	4.77502e-26	7	cmpy
Calr3	3.75896e-30	1.22619	0.957	0.502	5.23736e-26	7	Calr
Hsp232	6.28881e-30	1.16093	0.971	0.413	8.7622e-26	7	Hsp23
CG140861	8.10084e-30	0.663666	0.377	0.045	1.12869e-25	7	CG14086
CG20821	5.60619e-29	1.02211	0.652	0.161	7.81111e-25	7	CG2082
dpr32	1.81223e-28	0.907548	0.58	0.128	2.52498e-24	7	dpr3
ATPsynbeta	3.88108e-28	0.839979	1	0.925	5.4075e-24	7	ATPsynbeta
CG427471	1.79744e-27	0.83751	0.551	0.112	2.50437e-23	7	CG42747
alphaTub84B1	1.00361e-26	0.800469	1	0.932	1.39833e-22	7	alphaTub84B
CG301722	1.44775e-26	0.948389	1	0.781	2.01715e-22	7	CG30172
TkR86C1	9.87121e-26	0.799693	0.522	0.108	1.37536e-21	7	TkR86C
HnRNP-K1	2.11965e-25	1.03319	0.942	0.492	2.9533e-21	7	HnRNP-K
CG135943	3.29443e-25	0.942195	0.638	0.177	4.59014e-21	7	CG13594
janA1	6.61749e-25	0.829302	0.681	0.206	9.22015e-21	7	janA
14-3-3epsilon2	1.50934e-24	0.597057	1	0.975	2.10297e-20	7	14-3-3epsilon
CG336391	1.5767e-24	0.801634	0.681	0.188	2.19682e-20	7	CG33639
SP23532	5.2132e-24	0.868171	0.841	0.307	7.26356e-20	7	SP2353
Act42A3	6.50178e-24	0.886206	0.971	0.576	9.05893e-20	7	Act42A
Su(var)2051	7.22866e-24	0.795457	0.986	0.523	1.00717e-19	7	Su(var)205
Prosbeta31	1.0544e-23	0.912115	0.768	0.3	1.4691e-19	7	Prosbeta3
Dscam41	6.87695e-23	0.810318	0.971	0.575	9.58166e-19	7	Dscam4
CG343471	7.89692e-23	0.786685	0.478	0.102	1.10028e-18	7	CG34347
CG437592	1.0204e-22	0.978618	0.652	0.194	1.42173e-18	7	CG43759
mam1	1.314e-22	0.808395	1	0.804	1.83079e-18	7	mam
Df312	1.31835e-22	0.512502	1	0.977	1.83686e-18	7	Df31
CR45668	1.93569e-22	0.580677	0.391	0.069	2.69699e-18	7	CR45668
kirre2	2.00019e-22	0.715965	0.739	0.22	2.78687e-18	7	kirre
fabp2	2.70684e-22	0.774221	0.986	0.519	3.77143e-18	7	fabp
Eip75B1	7.72309e-22	0.855945	0.957	0.449	1.07606e-17	7	Eip75B
beat-Vc2	9.57997e-22	0.80272	0.536	0.134	1.33478e-17	7	beat-Vc
cpo1	2.78399e-21	0.59678	1	0.956	3.87893e-17	7	cpo
noc1	3.36127e-21	0.76995	0.565	0.15	4.68326e-17	7	noc
blw1	1.09328e-20	0.653355	1	0.898	1.52326e-16	7	blw
CG99322	1.12407e-20	0.764835	0.696	0.22	1.56616e-16	7	CG9932
chinmo2	1.32589e-20	0.780203	1	0.721	1.84737e-16	7	chinmo
robo31	1.97774e-20	0.574802	0.449	0.096	2.75558e-16	7	robo3
awd1	3.67715e-20	0.789598	0.942	0.668	5.12337e-16	7	awd
HIP-R	1.10327e-19	0.784812	0.725	0.274	1.53718e-15	7	HIP-R
CG77812	1.86326e-19	0.600047	1	0.91	2.59608e-15	7	CG7781
nuf1	2.42969e-19	0.841275	0.58	0.176	3.38528e-15	7	nuf
ATPsynC1	3.49477e-19	0.483896	1	0.987	4.86926e-15	7	ATPsynC
CG5446	6.58641e-19	0.82564	0.623	0.219	9.17685e-15	7	CG5446
CG172703	8.49549e-19	0.743103	0.87	0.417	1.18368e-14	7	CG17270
Act5C1	8.78533e-19	0.75662	1	0.715	1.22406e-14	7	Act5C
SmD31	1.35352e-18	0.67155	0.522	0.148	1.88586e-14	7	SmD3
Set	1.37329e-18	0.805639	0.623	0.217	1.9134e-14	7	Set
Argk2	2.29531e-18	0.734057	0.957	0.745	3.19806e-14	7	Argk
mbl1	2.36957e-18	0.576598	0.754	0.261	3.30153e-14	7	mbl
128up	2.83811e-18	0.598051	0.435	0.105	3.95434e-14	7	128up
ATPsyngamma	4.39554e-18	0.600011	1	0.843	6.1243e-14	7	ATPsyngamma
Nurf-381	4.68955e-18	0.806277	0.797	0.364	6.53396e-14	7	Nurf-38
ATPsynB	1.74687e-17	0.532749	1	0.904	2.43391e-13	7	ATPsynB
bou	2.22124e-17	0.488893	0.275	0.044	3.09485e-13	7	bou
beat-IIIc3	2.22885e-17	0.96718	0.507	0.147	3.10545e-13	7	beat-IIIc
Btk29A1	2.52068e-17	0.729258	0.841	0.389	3.51206e-13	7	Btk29A
otk2	2.79353e-17	0.802	0.667	0.259	3.89223e-13	7	otk
CG320521	3.57572e-17	0.725617	0.377	0.086	4.98205e-13	7	CG32052
FKBP592	3.91079e-17	0.705941	0.768	0.305	5.4489e-13	7	FKBP59
shakB2	4.12317e-17	0.546002	1	0.94	5.74482e-13	7	shakB
smt3	9.61951e-17	0.532891	1	0.905	1.34029e-12	7	smt3
l(1)G02551	1.01813e-16	0.782755	0.71	0.312	1.41855e-12	7	l(1)G0255
CG31075	1.53285e-16	0.556494	0.304	0.058	2.13572e-12	7	CG31075
Drak1	1.57032e-16	0.839522	0.768	0.358	2.18793e-12	7	Drak
CG41012	2.37917e-16	0.723178	0.812	0.427	3.3149e-12	7	CG4101
jim3	3.00232e-16	0.585855	0.986	0.881	4.18313e-12	7	jim
COX41	3.80835e-16	0.467911	1	0.964	5.30617e-12	7	COX4
Sec61beta2	4.34093e-16	0.739373	0.87	0.518	6.04822e-12	7	Sec61beta
AstC-R12	5.2545e-16	0.575745	0.42	0.105	7.32109e-12	7	AstC-R1
alphaSnap1	7.39607e-16	0.628455	0.957	0.739	1.0305e-11	7	alphaSnap
pros2	7.82742e-16	0.347911	1	0.907	1.09059e-11	7	pros
plum2	9.022e-16	0.53762	0.377	0.088	1.25704e-11	7	plum
CG10880	9.18983e-16	0.598013	0.42	0.113	1.28042e-11	7	CG10880
KdelR2	1.07576e-15	0.698683	0.87	0.481	1.49886e-11	7	KdelR
Fis1	1.29144e-15	0.597193	0.986	0.806	1.79936e-11	7	Fis1
E2f12	1.30456e-15	0.728518	0.638	0.247	1.81764e-11	7	E2f1
COX5A1	1.90384e-15	0.52898	1	0.865	2.65262e-11	7	COX5A
CG31460	1.95008e-15	0.702158	0.478	0.146	2.71705e-11	7	CG31460
CNBP1	2.24994e-15	0.685536	0.899	0.483	3.13484e-11	7	CNBP
Trim92	2.72003e-15	0.648263	0.449	0.128	3.78982e-11	7	Trim9
CG16817	2.85987e-15	0.588061	0.986	0.744	3.98466e-11	7	CG16817
kek23	3.06849e-15	0.595222	0.739	0.28	4.27533e-11	7	kek2
mRpL27	4.67935e-15	0.622457	0.551	0.188	6.51974e-11	7	mRpL27
CG132202	5.05267e-15	0.760513	0.565	0.202	7.03989e-11	7	CG13220
porin	6.35195e-15	0.432935	1	0.973	8.85018e-11	7	porin
kug2	8.24046e-15	0.615412	0.565	0.185	1.14814e-10	7	kug
Hr41	9.7512e-15	0.565778	1	0.904	1.35863e-10	7	Hr4
smal2	1.51311e-14	0.559351	0.478	0.141	2.10821e-10	7	smal
Stt3B	1.53391e-14	0.556999	0.449	0.133	2.13719e-10	7	Stt3B
CanB23	2.14387e-14	0.659955	0.899	0.516	2.98706e-10	7	CanB2
Rsf12	3.4252e-14	0.547037	0.971	0.816	4.77232e-10	7	Rsf1
mRpL15	6.50756e-14	0.593348	0.406	0.115	9.06698e-10	7	mRpL15
CG10166	7.35409e-14	0.421707	0.29	0.06	1.02465e-09	7	CG10166
Gp931	8.07966e-14	0.630916	0.609	0.237	1.12574e-09	7	Gp93
CaBP11	8.21059e-14	0.662093	0.507	0.175	1.14398e-09	7	CaBP1
Dip-B	1.77685e-13	0.520174	0.304	0.07	2.47568e-09	7	Dip-B
CG112671	2.1462e-13	0.624494	0.899	0.566	2.99031e-09	7	CG11267
CG42239	2.43511e-13	0.494147	0.348	0.088	3.39283e-09	7	CG42239
ND-PDSW1	2.46886e-13	0.576233	0.87	0.662	3.43986e-09	7	ND-PDSW
UQCR-Q2	3.52927e-13	0.532123	0.971	0.781	4.91734e-09	7	UQCR-Q
mRpL35	5.5968e-13	0.541681	0.42	0.129	7.79801e-09	7	mRpL35
nmo1	7.33713e-13	0.514155	1	0.844	1.02228e-08	7	nmo
Ace2	1.00882e-12	0.584078	0.725	0.321	1.40559e-08	7	Ace
betaTub56D1	1.02293e-12	0.490294	0.971	0.788	1.42525e-08	7	betaTub56D
tko	1.2475e-12	0.524836	0.71	0.311	1.73815e-08	7	tko
Syn13	1.59927e-12	0.677875	0.826	0.51	2.22827e-08	7	Syn1
bai	1.64488e-12	0.540553	0.71	0.318	2.29181e-08	7	bai
Ten-m3	1.8108e-12	0.582614	0.739	0.337	2.52298e-08	7	Ten-m
CG147153	2.01035e-12	0.642084	0.449	0.152	2.80101e-08	7	CG14715
ap2	2.29602e-12	0.480602	0.42	0.125	3.19904e-08	7	ap
sds22	2.42885e-12	0.520609	0.319	0.082	3.38411e-08	7	sds22
Prosbeta4	3.82002e-12	0.548145	0.797	0.429	5.32244e-08	7	Prosbeta4
eIF4E12	3.9108e-12	0.628026	0.928	0.614	5.44891e-08	7	eIF4E1
CG10418	4.31193e-12	0.523351	0.377	0.111	6.00781e-08	7	CG10418
Mgstl	4.75129e-12	0.543874	0.377	0.112	6.61997e-08	7	Mgstl
ATPsyndelta1	5.44162e-12	0.520072	0.957	0.72	7.58181e-08	7	ATPsyndelta
UQCR-111	8.47561e-12	0.506363	1	0.852	1.18091e-07	7	UQCR-11
dpr62	8.5479e-12	0.557851	0.681	0.305	1.19098e-07	7	dpr6
CG6180	8.99985e-12	0.638318	0.623	0.281	1.25395e-07	7	CG6180
Ostgamma1	9.23318e-12	0.574095	0.551	0.226	1.28646e-07	7	Ostgamma
Hat1	9.49892e-12	0.468349	0.348	0.096	1.32348e-07	7	Hat1
twr1	1.11713e-11	0.63911	0.768	0.423	1.5565e-07	7	twr
CG12279	1.19926e-11	0.55936	0.594	0.241	1.67092e-07	7	CG12279
CG28621	1.54058e-11	0.588619	0.725	0.337	2.14648e-07	7	CG2862
vimar1	1.56031e-11	0.505393	0.362	0.102	2.17398e-07	7	vimar
CG113602	1.9511e-11	0.540164	0.957	0.639	2.71847e-07	7	CG11360
Rbp1	1.98048e-11	0.558937	0.739	0.376	2.7594e-07	7	Rbp1
ND-MWFE1	3.11174e-11	0.597871	0.826	0.482	4.33558e-07	7	ND-MWFE
CG59462	4.09138e-11	0.629296	0.594	0.27	5.70052e-07	7	CG5946
CR43264	4.76135e-11	0.678071	0.29	0.071	6.63399e-07	7	CR43264
ND-39	5.00475e-11	0.640866	0.768	0.471	6.97312e-07	7	ND-39
ox1	5.062e-11	0.561958	0.826	0.561	7.05289e-07	7	ox
Frl1	5.42809e-11	0.500697	0.942	0.622	7.56296e-07	7	Frl
Idh2	5.528e-11	0.561793	0.478	0.184	7.70217e-07	7	Idh
trsn	6.0084e-11	0.433906	0.348	0.1	8.3715e-07	7	trsn
CG136852	6.43157e-11	0.642165	0.754	0.417	8.9611e-07	7	CG13685
Spase25	8.21646e-11	0.579848	0.696	0.357	1.1448e-06	7	Spase25
CG442421	8.87611e-11	0.483796	0.913	0.66	1.23671e-06	7	CG44242
asrij	8.98836e-11	0.503724	0.362	0.113	1.25235e-06	7	asrij
boca	9.38525e-11	0.553966	0.551	0.241	1.30765e-06	7	boca
GluClalpha2	9.77973e-11	0.493151	0.971	0.769	1.36261e-06	7	GluClalpha
CG42376	1.0264e-10	0.563102	0.565	0.245	1.43008e-06	7	CG42376
Ost48	1.33996e-10	0.599748	0.623	0.3	1.86697e-06	7	Ost48
glec1	1.40546e-10	0.54832	0.754	0.409	1.95823e-06	7	glec
tsr2	1.63499e-10	0.511747	0.899	0.606	2.27803e-06	7	tsr
CG10470	1.70714e-10	0.603331	0.565	0.259	2.37855e-06	7	CG10470
ATPsynO	1.92803e-10	0.4654	0.986	0.844	2.68632e-06	7	ATPsynO
CG76301	2.06806e-10	0.362898	0.971	0.923	2.88143e-06	7	CG7630
ND-B14.5A	2.16785e-10	0.596026	0.696	0.372	3.02046e-06	7	ND-B14.5A
Cyp4p2	2.37623e-10	0.439484	0.333	0.095	3.3108e-06	7	Cyp4p2
Prosalpha6	2.47284e-10	0.546331	0.594	0.274	3.4454e-06	7	Prosalpha6
EndoB2	2.75504e-10	0.645364	0.58	0.307	3.83859e-06	7	EndoB
Scox	3.04623e-10	0.476999	0.362	0.121	4.24431e-06	7	Scox
COX7C1	3.05646e-10	0.465702	0.957	0.88	4.25857e-06	7	COX7C
CG9953	3.31906e-10	0.504664	0.42	0.148	4.62445e-06	7	CG9953
oaf1	3.41295e-10	0.674349	0.522	0.23	4.75527e-06	7	oaf
ND-B141	3.55314e-10	0.566972	0.87	0.646	4.95059e-06	7	ND-B14
CG2852	3.8477e-10	0.372783	1	0.949	5.361e-06	7	CG2852
P32	4.06635e-10	0.528745	0.435	0.162	5.66564e-06	7	P32
fax1	4.56885e-10	0.272733	1	0.99	6.36577e-06	7	fax
COX5B	4.80488e-10	0.457073	0.971	0.809	6.69465e-06	7	COX5B
ND-241	5.22847e-10	0.607066	0.652	0.336	7.28482e-06	7	ND-24
Sod12	6.83541e-10	0.443684	0.957	0.752	9.52378e-06	7	Sod1
CG11752	6.93694e-10	0.561712	0.754	0.473	9.66523e-06	7	CG11752
CG341132	7.34278e-10	0.557576	0.942	0.765	1.02307e-05	7	CG34113
scrt2	7.85398e-10	0.417119	0.971	0.827	1.09429e-05	7	scrt
nAChRalpha32	8.46851e-10	0.450989	0.391	0.133	1.17992e-05	7	nAChRalpha3
RFeSP	8.55466e-10	0.454701	0.942	0.791	1.19192e-05	7	RFeSP
CG43411	8.67041e-10	0.553978	0.478	0.186	1.20805e-05	7	CG4341
CG36552	9.23172e-10	0.503147	0.594	0.267	1.28626e-05	7	CG3655
CG33947	9.7084e-10	0.567663	0.435	0.176	1.35267e-05	7	CG33947
eEF51	9.91152e-10	0.317217	1	0.982	1.38097e-05	7	eEF5
CG15012	1.02261e-09	0.472632	0.942	0.759	1.4248e-05	7	CG15012
Hsc70-32	1.13085e-09	0.57184	0.739	0.406	1.57561e-05	7	Hsc70-3
Prosalpha5	1.1913e-09	0.565421	0.594	0.274	1.65984e-05	7	Prosalpha5
CG423403	1.20652e-09	0.565157	0.884	0.593	1.68105e-05	7	CG42340
levy1	1.53613e-09	0.363542	0.971	0.899	2.14029e-05	7	levy
CG17776	1.54036e-09	0.456708	0.449	0.173	2.14619e-05	7	CG17776
gukh	1.77949e-09	0.511098	0.522	0.233	2.47936e-05	7	gukh
dod	1.8969e-09	0.489769	0.754	0.431	2.64295e-05	7	dod
CG110003	2.3221e-09	0.584621	0.565	0.271	3.23537e-05	7	CG11000
ND-51	2.4967e-09	0.536419	0.725	0.388	3.47865e-05	7	ND-51
Ca-alpha1T3	2.58804e-09	0.624832	0.58	0.269	3.60591e-05	7	Ca-alpha1T
CG11999	2.72296e-09	0.525283	0.362	0.129	3.7939e-05	7	CG11999
GABPI1	3.12523e-09	0.527395	0.551	0.262	4.35439e-05	7	GABPI
CG11858	3.17439e-09	0.492772	0.348	0.119	4.42288e-05	7	CG11858
RpS121	3.21256e-09	0.314711	1	0.966	4.47606e-05	7	RpS12
CG96621	3.33555e-09	0.511376	0.478	0.198	4.64742e-05	7	CG9662
Cbs	3.35206e-09	0.346863	0.348	0.111	4.67042e-05	7	Cbs
pnut1	3.40742e-09	0.553434	0.739	0.456	4.74755e-05	7	pnut
CG441532	3.44255e-09	0.504044	0.551	0.231	4.7965e-05	7	CG44153
Cchl	3.66746e-09	0.499963	0.667	0.359	5.10987e-05	7	Cchl
CG5516	3.95493e-09	0.507791	0.507	0.22	5.5104e-05	7	CG5516
CG137511	3.99785e-09	0.485382	0.507	0.229	5.5702e-05	7	CG13751
Syx1A1	4.06537e-09	0.32474	1	0.929	5.66429e-05	7	Syx1A
RpL392	4.58434e-09	0.339978	1	0.938	6.38736e-05	7	RpL39
RpLP22	4.72866e-09	0.294202	1	0.977	6.58844e-05	7	RpLP2
miple11	5.07369e-09	0.305205	1	0.984	7.06917e-05	7	miple1
CCT4	5.43288e-09	0.492735	0.551	0.259	7.56964e-05	7	CCT4
Tom7	5.68183e-09	0.491682	0.884	0.558	7.9165e-05	7	Tom7
Klc	5.91233e-09	0.510074	0.594	0.286	8.23764e-05	7	Klc
ATPsynCF6	6.12285e-09	0.376109	0.986	0.889	8.53097e-05	7	ATPsynCF6
KrT95D3	6.42913e-09	0.513032	0.899	0.621	8.95771e-05	7	KrT95D
Scgalpha	6.86897e-09	0.568658	0.681	0.402	9.57054e-05	7	Scgalpha
CG97051	7.5522e-09	0.423685	0.348	0.119	0.000105225	7	CG9705
GPHR	7.98404e-09	0.427036	0.319	0.104	0.000111242	7	GPHR
Tspo1	1.03356e-08	0.454368	0.449	0.184	0.000144007	7	Tspo
CG14321	1.03835e-08	0.437054	0.812	0.504	0.000144673	7	CG14321
Aos1	1.15571e-08	0.42371	0.377	0.138	0.000161025	7	Aos1
Non21	1.17055e-08	0.58666	0.667	0.406	0.000163093	7	Non2
CG56761	1.32225e-08	0.465503	0.928	0.707	0.000184229	7	CG5676
cype	1.33106e-08	0.37275	1	0.958	0.000185457	7	cype
2021-09-02	1.42425e-08	0.512853	0.739	0.44	0.000198441	7	2021-09-02
mRpS33	1.48165e-08	0.503583	0.609	0.313	0.000206438	7	mRpS33
ND-15	1.52374e-08	0.494223	0.826	0.648	0.000212303	7	ND-15
MED71	1.54113e-08	0.534472	0.652	0.374	0.000214726	7	MED7
CG12129	1.56966e-08	0.391734	0.319	0.107	0.000218701	7	CG12129
Cyt-c11	1.58763e-08	0.510451	0.841	0.537	0.000221204	7	Cyt-c1
Tapdelta	1.67695e-08	0.504414	0.754	0.465	0.00023365	7	Tapdelta
Snx31	2.37932e-08	0.494972	0.58	0.289	0.000331511	7	Snx3
Pfdn5	2.49563e-08	0.478645	0.812	0.575	0.000347716	7	Pfdn5
CG15881	2.81657e-08	0.539204	0.435	0.188	0.000392432	7	CG15881
CG11444	3.04027e-08	0.525167	0.565	0.288	0.000423601	7	CG11444
CG12817	3.07027e-08	0.50286	0.42	0.18	0.000427781	7	CG12817
CG16986	3.12005e-08	0.456059	0.319	0.109	0.000434716	7	CG16986
crp2	3.29e-08	0.521339	0.754	0.457	0.000458395	7	crp
Uch-L5	3.42744e-08	0.422911	0.406	0.163	0.000477545	7	Uch-L5
Tsp42Ee1	3.94382e-08	0.500366	0.522	0.252	0.000549492	7	Tsp42Ee
drl2	3.95587e-08	0.426606	0.565	0.26	0.000551171	7	drl
CG31712	4.10961e-08	0.526082	0.739	0.481	0.000572592	7	CG31712
ERp601	4.30005e-08	0.491166	0.493	0.231	0.000599126	7	ERp60
CG13551	4.30676e-08	0.397752	0.942	0.79	0.000600061	7	CG13551
CG138871	4.90685e-08	0.568414	0.739	0.494	0.000683672	7	CG13887
su(w[a])2	5.07894e-08	0.557887	0.522	0.257	0.000707648	7	su(w[a])
ena1	5.19305e-08	0.489517	0.768	0.462	0.000723548	7	ena
Mtch1	5.68031e-08	0.440536	0.551	0.269	0.000791437	7	Mtch
CG8860	5.9656e-08	0.495182	0.71	0.457	0.000831187	7	CG8860
ND-ASHI	6.32527e-08	0.467624	0.739	0.467	0.000881299	7	ND-ASHI
Fnta	6.41214e-08	0.419309	0.362	0.138	0.000893403	7	Fnta
CG13071	6.707e-08	0.494285	0.594	0.318	0.000934486	7	CG1307
Trx-2	7.84583e-08	0.367324	0.971	0.835	0.00109316	7	Trx-2
ND-B14.5B1	8.10069e-08	0.531947	0.725	0.457	0.00112867	7	ND-B14.5B
Rbp93	8.13138e-08	0.35733	0.928	0.666	0.00113295	7	Rbp9
CG13365	8.28447e-08	0.453038	0.478	0.22	0.00115427	7	CG13365
Tm11	8.62096e-08	0.409824	0.913	0.766	0.00120116	7	Tm1
Uch	9.07771e-08	0.47635	0.377	0.154	0.0012648	7	Uch
mRpL21	9.85189e-08	0.492889	0.42	0.183	0.00137266	7	mRpL21
icln1	9.88647e-08	0.473853	0.449	0.21	0.00137748	7	icln
CG8891	1.06884e-07	0.376036	0.304	0.105	0.00148921	7	CG8891
CG9669	1.12845e-07	0.471044	0.493	0.225	0.00157227	7	CG9669
cyp33	1.13757e-07	0.442381	0.348	0.134	0.00158498	7	cyp33
CG13994	1.17206e-07	0.351498	0.29	0.096	0.00163303	7	CG13994
Arpc3A1	1.17213e-07	0.462794	0.551	0.268	0.00163313	7	Arpc3A
Tim17b	1.22645e-07	0.362106	0.957	0.822	0.00170881	7	Tim17b
COX81	1.26213e-07	0.379717	0.986	0.869	0.00175852	7	COX8
ATPsynF	1.27458e-07	0.279152	0.957	0.962	0.00177587	7	ATPsynF
arm1	1.27639e-07	0.429508	0.855	0.589	0.0017784	7	arm
ND-201	1.31386e-07	0.490998	0.783	0.517	0.0018306	7	ND-20
CG5323	1.41489e-07	0.343344	0.275	0.088	0.00197137	7	CG5323
CG331701	1.46975e-07	0.445928	0.609	0.31	0.0020478	7	CG33170
CG402282	1.48473e-07	0.5628	0.797	0.56	0.00206868	7	CG40228
ND-18	1.50609e-07	0.499272	0.783	0.541	0.00209843	7	ND-18
muc	1.52837e-07	0.501982	0.478	0.235	0.00212948	7	muc
mEFTs1	1.54214e-07	0.392617	0.377	0.149	0.00214866	7	mEFTs
CG10098	1.61839e-07	0.465267	0.783	0.511	0.0022549	7	CG10098
UQCR-C1	1.72567e-07	0.431951	0.884	0.669	0.00240438	7	UQCR-C1
CG12091	1.88523e-07	0.403317	0.783	0.477	0.00262669	7	CG12091
Pdi1	1.88564e-07	0.419385	0.681	0.383	0.00262727	7	Pdi
CG31717	1.93872e-07	0.487424	0.536	0.276	0.00270122	7	CG31717
CG34132	2.08778e-07	0.473767	0.667	0.39	0.0029089	7	CG34132
Sh3beta	2.14777e-07	0.500968	0.638	0.363	0.00299248	7	Sh3beta
CG13364	2.21466e-07	0.414623	0.899	0.697	0.00308569	7	CG13364
APC10	2.39916e-07	0.367699	0.261	0.084	0.00334275	7	APC10
CG9257	2.48632e-07	0.502209	0.42	0.187	0.00346419	7	CG9257
Cisd2	2.49187e-07	0.468533	0.841	0.535	0.00347192	7	Cisd2
Hsc70-41	2.67646e-07	0.359849	0.957	0.875	0.00372912	7	Hsc70-4
Fili2	2.68106e-07	0.398111	0.319	0.115	0.00373552	7	Fili
Nph1	2.78745e-07	0.410984	0.42	0.184	0.00388375	7	Nph
mEFTu1	2.86644e-07	0.450732	0.435	0.201	0.0039938	7	mEFTu1
Arpc5	2.86688e-07	0.44907	0.594	0.316	0.00399443	7	Arpc5
mRpL19	3.1195e-07	0.35959	0.348	0.132	0.0043464	7	mRpL19
Ubc10	3.36639e-07	0.428611	0.435	0.198	0.00469039	7	Ubc10
CG331433	3.43147e-07	0.473382	0.464	0.215	0.00478107	7	CG33143
CG341363	3.44948e-07	0.390128	0.493	0.229	0.00480616	7	CG34136
BCAS2	3.48242e-07	0.407567	0.304	0.11	0.00485206	7	BCAS2
SmD11	3.59476e-07	0.509124	0.391	0.173	0.00500858	7	SmD1
Arpc4	3.64277e-07	0.491869	0.725	0.473	0.00507547	7	Arpc4
CG145911	3.69819e-07	0.510793	0.362	0.156	0.00515268	7	CG14591
CG331441	3.93751e-07	0.416769	0.449	0.207	0.00548613	7	CG33144
HP1c1	3.96353e-07	0.403182	0.522	0.249	0.00552238	7	HP1c
CG3887	4.47284e-07	0.444948	0.565	0.299	0.00623201	7	CG3887
Ras85D1	4.50818e-07	0.411776	0.725	0.425	0.00628125	7	Ras85D
CG14210	4.68848e-07	0.395502	0.261	0.087	0.00653246	7	CG14210
CG15922	5.67633e-07	0.321061	0.275	0.094	0.00790883	7	CG15922
fra2	5.70751e-07	0.453341	0.29	0.107	0.00795227	7	fra
Akap2001	6.10511e-07	0.441749	0.594	0.321	0.00850625	7	Akap200
CG8993	6.33823e-07	0.481021	0.797	0.509	0.00883106	7	CG8993
CG9922	6.41972e-07	0.441425	0.696	0.436	0.0089446	7	CG9922
CG5168	6.55578e-07	0.42017	0.507	0.262	0.00913417	7	CG5168
beat-Va2	6.60197e-07	0.357062	0.362	0.148	0.00919852	7	beat-Va
MagR	6.675e-07	0.407154	0.667	0.412	0.00930027	7	MagR
GlcAT-S2	7.79877e-07	0.405366	0.348	0.143	0.010866	7	GlcAT-S
CNPYb1	7.88589e-07	0.360636	0.406	0.179	0.0109874	7	CNPYb
CG425241	7.91439e-07	0.434438	0.333	0.136	0.0110271	7	CG42524
beat-VI2	8.60133e-07	0.33414	0.406	0.165	0.0119842	7	beat-VI
ND-42	8.69028e-07	0.46441	0.623	0.383	0.0121082	7	ND-42
l(3)neo382	8.79265e-07	0.380041	0.638	0.354	0.0122508	7	l(3)neo38
Drat	8.92401e-07	0.424966	0.841	0.6	0.0124338	7	Drat
CG3420	8.9624e-07	0.345903	0.275	0.096	0.0124873	7	CG3420
SmB	9.09195e-07	0.478321	0.652	0.413	0.0126678	7	SmB
CG6115	9.61381e-07	0.374152	0.913	0.662	0.0133949	7	CG6115
AspRS	9.80322e-07	0.344339	0.29	0.103	0.0136588	7	AspRS
Nrg1	9.90546e-07	0.480714	0.884	0.651	0.0138013	7	Nrg
CCT3	9.95822e-07	0.422683	0.449	0.207	0.0138748	7	CCT3
Hrb98DE	1.00977e-06	0.463825	0.826	0.608	0.0140691	7	Hrb98DE
mRpS21	1.02787e-06	0.417538	0.391	0.171	0.0143213	7	mRpS21
SmF	1.07681e-06	0.436142	0.29	0.108	0.0150031	7	SmF
CadN4	1.21769e-06	0.313998	0.899	0.555	0.0169661	7	CadN
CG9125	1.33747e-06	0.332973	0.261	0.09	0.018635	7	CG9125
CSN7	1.46745e-06	0.381015	0.696	0.42	0.0204459	7	CSN7
TM4SF1	1.49698e-06	0.409641	0.768	0.533	0.0208574	7	TM4SF
CG15118	1.5931e-06	0.387182	0.304	0.119	0.0221967	7	CG15118
CRIF	1.74894e-06	0.340566	0.304	0.115	0.024368	7	CRIF
D1	1.76964e-06	0.420259	0.87	0.641	0.0246564	7	D1
CG2611	1.81814e-06	0.36804	0.304	0.118	0.0253322	7	CG2611
ths2	1.85627e-06	0.584041	0.348	0.156	0.0258634	7	ths
sn1	1.93571e-06	0.458839	0.406	0.194	0.0269703	7	sn
mRpL34	2.02065e-06	0.326696	0.304	0.116	0.0281538	7	mRpL34
CG8778	2.03271e-06	0.394481	0.377	0.169	0.0283218	7	CG8778
RpII18	2.13969e-06	0.397369	0.522	0.272	0.0298123	7	RpII18
Nrt2	2.20738e-06	0.464494	0.609	0.361	0.0307554	7	Nrt
Prosalpha7	2.26916e-06	0.412244	0.522	0.278	0.0316162	7	Prosalpha7
CG116381	2.76512e-06	0.414507	0.333	0.144	0.0385264	7	CG11638
mRpS26	2.90183e-06	0.400989	0.522	0.271	0.0404312	7	mRpS26
SCAR	2.93355e-06	0.430882	0.551	0.307	0.0408732	7	SCAR
CG148831	2.95243e-06	0.38893	0.362	0.159	0.0411362	7	CG14883
CG7903	3.20128e-06	0.375191	0.42	0.202	0.0446035	7	CG7903
CSN4	3.28377e-06	0.338599	0.362	0.155	0.0457528	7	CSN4
DMAP1	3.59482e-06	0.296477	0.275	0.1	0.0500866	7	DMAP1
roh	3.66786e-06	0.39887	0.87	0.817	0.0511043	7	roh
CG11781	3.74835e-06	0.460474	0.565	0.32	0.0522258	7	CG11781
lost	3.75658e-06	0.415458	0.58	0.325	0.0523405	7	lost
snRNA:7SK1	3.93893e-06	0.471084	0.87	0.721	0.0548811	7	snRNA:7SK
CG12848	4.20027e-06	0.38192	0.362	0.163	0.0585223	7	CG12848
U4-U6-60K1	4.28445e-06	0.422436	0.406	0.194	0.0596952	7	U4-U6-60K
opm	4.43354e-06	0.359974	0.275	0.107	0.0617725	7	opm
bol2	4.54313e-06	0.356689	0.913	0.641	0.0632995	7	bol
Rheb	4.6179e-06	0.408505	0.464	0.236	0.0643412	7	Rheb
ND-B151	4.82444e-06	0.427421	0.855	0.624	0.0672189	7	ND-B15
Hsp60A	4.83849e-06	0.296388	0.797	0.5	0.0674147	7	Hsp60A
Myo81F3	5.01772e-06	0.40921	0.783	0.526	0.0699119	7	Myo81F
x16	5.24794e-06	0.371635	0.522	0.277	0.0731196	7	x16
CG15891	5.27967e-06	0.472537	0.42	0.217	0.0735617	7	CG15891
CG5903	5.40045e-06	0.385444	0.768	0.554	0.0752445	7	CG5903
ND-ACP	5.62346e-06	0.336727	0.928	0.771	0.0783517	7	ND-ACP
LRP12	5.78891e-06	0.423562	0.391	0.185	0.0806569	7	LRP1
Prosbeta5	5.90915e-06	0.365259	0.754	0.528	0.0823322	7	Prosbeta5
msi3	6.03798e-06	0.311882	0.58	0.296	0.0841272	7	msi
emc	6.07043e-06	0.335004	0.913	0.804	0.0845793	7	emc
CG79461	6.32287e-06	0.418473	0.362	0.169	0.0880965	7	CG7946
cathD1	6.35427e-06	0.425488	0.449	0.234	0.088534	7	cathD
InR1	6.47052e-06	0.49093	0.565	0.333	0.0901537	7	InR
Rpn10	7.02618e-06	0.420714	0.565	0.324	0.0978958	7	Rpn10
mRpL12	7.07297e-06	0.3718	0.623	0.384	0.0985477	7	mRpL12
Pabp2	7.61922e-06	0.385577	0.536	0.295	0.106159	7	Pabp2
CG10802	8.23711e-06	0.357538	0.29	0.118	0.114768	7	CG10802
CG11134	8.37722e-06	0.358256	0.29	0.121	0.11672	7	CG11134
mRpS2	9.51407e-06	0.392458	0.348	0.162	0.132559	7	mRpS2
ATPsynD	9.63783e-06	0.274909	0.928	0.844	0.134284	7	ATPsynD
eIF2beta	1.01199e-05	0.354128	0.681	0.436	0.141	7	eIF2beta
Ran	1.02275e-05	0.374902	0.754	0.524	0.1425	7	Ran
Prosbeta1	1.04502e-05	0.404068	0.623	0.382	0.145602	7	Prosbeta1
l(2)37Cc	1.0789e-05	0.428785	0.319	0.14	0.150323	7	l(2)37Cc
FucTA1	1.08993e-05	0.344878	0.362	0.162	0.15186	7	FucTA
CG8931	1.11531e-05	0.31413	0.275	0.106	0.155396	7	CG8931
Mdh1	1.1228e-05	0.37805	0.435	0.221	0.156439	7	Mdh1
ND-19	1.12626e-05	0.411145	0.696	0.482	0.156922	7	ND-19
CG42336	1.13634e-05	0.440081	0.507	0.285	0.158326	7	CG42336
COX6B	1.18839e-05	0.279863	0.986	0.928	0.165578	7	COX6B
CG74841	1.21134e-05	0.416499	0.536	0.316	0.168776	7	CG7484
CG32441	1.23636e-05	0.445155	0.725	0.488	0.172262	7	CG32441
Dad1	1.251e-05	0.390365	0.522	0.312	0.174302	7	Dad1
ND-B17.2	1.31673e-05	0.318761	0.768	0.473	0.18346	7	ND-B17.2
SerRS	1.32259e-05	0.407405	0.29	0.123	0.184276	7	SerRS
CG4393	1.4946e-05	0.407858	0.449	0.243	0.208242	7	CG4393
[truncated: 2,640 more rows]

## Sheet: 3.CircadianSubclustering
	p_val	avg_logFC	pct.1	pct.2	p_val_adj	cluster	gene		Genes used to annotate subclusters
bab2	1.58709e-09	0.945262	0.824	0	2.21129e-05	0	bab2
CG34136	1.08461e-08	1.60164	1	0.147	0.000151119	0	CG34136
lov	3.61443e-08	0.694271	0.824	0.029	0.000503599	0	lov
VGlut	5.32018e-08	1.73216	1	0.324	0.000741261	0	VGlut
CG6330	5.84706e-08	0.757305	1	0.206	0.000814671	0	CG6330
gl	1.16266e-07	0.702944	0.882	0.059	0.00161993	0	gl
twit	2.82912e-07	0.65406	0.941	0.088	0.00394182	0	twit
ST6Gal	2.82912e-07	0.645342	0.941	0.088	0.00394182	0	ST6Gal
Usp8	3.05843e-07	0.640608	1	0.147	0.0042613	0	Usp8
emc	3.39741e-07	0.996286	0.882	0.118	0.00473361	0	emc
TrpA1	3.59527e-07	0.98198	0.882	0.088	0.00500928	0	TrpA1
CG17364	4.8824e-07	0.707312	0.882	0.118	0.00680264	0	CG17364
beat-Ic	6.98415e-07	0.719107	0.882	0.118	0.00973102	0	beat-Ic
CG30089	7.27789e-07	0.900017	1	0.176	0.0101403	0	CG30089
DIP-theta	9.50493e-07	0.959604	1	0.235	0.0132432	0	DIP-theta
tyn	1.03051e-06	0.503601	0.588	0	0.0143581	0	tyn
dpr9	1.497e-06	1.01277	0.941	0.206	0.0208577	0	dpr9
jeb	1.96532e-06	0.830702	1	0.176	0.0273828	0	jeb
slgA	2.52976e-06	0.804423	1	0.941	0.0352471	0	slgA
CG6154	2.61011e-06	0.552101	0.765	0.088	0.0363667	0	CG6154
AstA	2.72634e-06	1.38496	1	0.265	0.0379862	0	AstA
Rfx	3.23386e-06	0.745792	0.941	0.176	0.0450574	0	Rfx
CCHa1-R	3.56479e-06	0.468933	0.647	0.029	0.0496682	0	CCHa1-R
Lac	3.56479e-06	0.362918	0.647	0.029	0.0496682	0	Lac
Dh31	4.501e-06	0.595645	0.706	0.059	0.0627124	0	Dh31
Oct-TyrR	5.91703e-06	0.438675	0.765	0.088	0.082442	0	Oct-TyrR
PVRAP	5.94341e-06	0.823015	1	0.676	0.0828096	0	PVRAP
CG13375	6.77722e-06	0.686712	0.882	0.206	0.0944269	0	CG13375
br	6.825e-06	0.488341	0.588	0.029	0.0950927	0	br
Ald	7.63119e-06	0.719889	1	0.529	0.106325	0	Ald
mew	9.23605e-06	0.553951	0.706	0.059	0.128686	0	mew
bab1	9.23605e-06	0.318211	0.706	0.059	0.128686	0	bab1
P5CDh1	1.43714e-05	0.700828	1	0.294	0.200237	0	P5CDh1
CG8910	1.47465e-05	0.40338	0.588	0.029	0.205462	0	CG8910
CG9650	1.577e-05	0.464025	0.706	0.088	0.219723	0	CG9650
sano	1.62695e-05	0.380523	0.765	0.088	0.226683	0	sano
nompB	1.89409e-05	0.377894	0.471	0	0.263903	0	nompB
pall	1.89409e-05	0.318236	0.471	0	0.263903	0	pall
DOR	1.96521e-05	0.582494	0.941	0.265	0.273813	0	DOR
CG31145	2.09707e-05	0.566119	0.941	0.235	0.292185	0	CG31145
Sytbeta	2.23623e-05	0.49803	0.647	0.059	0.311573	0	Sytbeta
Got1	2.23623e-05	0.470583	0.647	0.059	0.311573	0	Got1
noe	2.37821e-05	0.463774	1	1	0.331356	0	noe
Sap47	2.83676e-05	0.538282	1	0.941	0.395247	0	Sap47
Top3beta	3.41374e-05	0.439541	0.706	0.088	0.475636	0	Top3beta
pyd	3.54136e-05	0.454296	0.647	0.059	0.493418	0	pyd
CG43340	3.54136e-05	0.354601	0.647	0.059	0.493418	0	CG43340
CG13698	3.62022e-05	0.73622	0.882	0.176	0.504405	0	CG13698
CG31957	4.00027e-05	0.428284	0.529	0.029	0.557358	0	CG31957
Ttc19	4.53e-05	0.386339	0.529	0.029	0.631164	0	Ttc19
Ubr1	4.5944e-05	0.356874	0.824	0.147	0.640137	0	Ubr1
twz	4.68172e-05	0.670017	0.588	0.059	0.652304	0	twz
Ggamma1	4.74087e-05	0.484375	1	0.853	0.660545	0	Ggamma1
CG13408	4.80283e-05	0.679749	1	0.235	0.669179	0	CG13408
CG13384	4.89069e-05	0.441214	0.765	0.118	0.68142	0	CG13384
dpr2	5.07097e-05	0.472884	0.824	0.147	0.706538	0	dpr2
dlp	5.1258e-05	0.335835	0.529	0.029	0.714178	0	dlp
CAP	5.1258e-05	0.33259	0.529	0.029	0.714178	0	CAP
spz5	5.79538e-05	0.334247	0.529	0.029	0.80747	0	spz5
ktub	5.79538e-05	0.256054	0.529	0.029	0.80747	0	ktub
CG42806	5.88861e-05	0.483851	0.588	0.059	0.82046	0	CG42806
stau	6.10849e-05	0.51567	1	0.382	0.851096	0	stau
mspo	6.11136e-05	0.560285	1	0.529	0.851496	0	mspo
ham	6.46763e-05	0.40468	0.706	0.088	0.901134	0	ham
CG31637	6.65039e-05	0.462898	0.941	0.294	0.926599	0	CG31637
igl	6.70915e-05	0.495934	1	0.941	0.934785	0	igl
ASPP	7.56507e-05	0.424755	0.412	0	1	0	ASPP
Gsc	7.56507e-05	0.396417	0.412	0	1	0	Gsc
Mct1	7.56507e-05	0.342841	0.412	0	1	0	Mct1
Rh7	7.88211e-05	0.611386	1	0.353	1	0	Rh7
Gyc89Da	7.93121e-05	0.677729	0.706	0.118	1	0	Gyc89Da
CG43373	8.26382e-05	0.321218	0.588	0.059	1	0	CG43373
CG12484	9.08338e-05	0.40544	0.824	0.176	1	0	CG12484
sra	0.000111261	0.703864	1	0.353	1	0	sra
VhaSFD	0.000117873	0.349502	1	0.235	1	0	VhaSFD
dnd	0.000128596	0.388335	0.588	0.059	1	0	dnd
exp	0.000128596	0.2812	0.588	0.059	1	0	exp
CG31814	0.000129966	0.586411	1	0.441	1	0	CG31814
CG14274	0.000130751	0.331847	0.706	0.118	1	0	CG14274
DIP-gamma	0.000141316	0.40599	0.824	0.206	1	0	DIP-gamma
rdgB	0.000144907	0.5845	0.882	0.265	1	0	rdgB
dpr3	0.000159344	0.35237	0.824	0.147	1	0	dpr3
bma	0.000162678	0.5233	0.941	0.382	1	0	bma
nord	0.000167813	0.430805	1	0.324	1	0	nord
rho	0.000167813	0.364316	1	0.324	1	0	rho
cos	0.000170852	0.320268	0.471	0.029	1	0	cos
futsch	0.000179315	0.478772	1	1	1	0	futsch
stmA	0.000190639	0.416708	0.588	0.088	1	0	stmA
Ufl1	0.000192583	0.345018	0.471	0.029	1	0	Ufl1
CG12818	0.000192583	0.311895	0.471	0.029	1	0	CG12818
CG31176	0.00019339	0.405801	0.882	0.176	1	0	CG31176
CG9674	0.000197808	0.44627	0.882	0.294	1	0	CG9674
CG45263	0.000198972	0.408737	1	0.412	1	0	CG45263
beat-Ia	0.000200181	0.691336	1	0.353	1	0	beat-Ia
B4	0.000200741	0.598336	0.824	0.265	1	0	B4
Octbeta2R	0.000208213	0.370553	1	0.471	1	0	Octbeta2R
CG11563	0.000216892	0.285757	0.471	0.029	1	0	CG11563
l(1)G0196	0.000216892	0.255974	0.471	0.029	1	0	l(1)G0196
Toll-6	0.000217444	0.487365	0.941	0.412	1	0	Toll-6
CG7546	0.000233853	0.334288	0.706	0.118	1	0	CG7546
Ggamma30A	0.000245737	0.585353	1	0.941	1	0	Ggamma30A
CG10353	0.000260179	0.259123	0.529	0.059	1	0	CG10353
ths	0.000264201	0.42133	0.882	0.265	1	0	ths
sca	0.0002832	0.582316	1	0.647	1	0	sca
Pdxk	0.000287426	0.406031	0.765	0.176	1	0	Pdxk
CG32091	0.000289651	0.420836	0.353	0	1	0	CG32091
Gyc89Db	0.000289651	0.326749	0.353	0	1	0	Gyc89Db
CR43148	0.000289651	0.270134	0.353	0	1	0	CR43148
ple	0.000289651	0.258294	0.353	0	1	0	ple
CG33228	0.000322549	0.376642	0.529	0.059	1	0	CG33228
RN-tre	0.000322549	0.265024	0.529	0.059	1	0	RN-tre
tok	0.000334689	0.286934	0.824	0.265	1	0	tok
Snap25	0.000337648	0.553297	1	0.676	1	0	Snap25
CG13502	0.000358743	0.665987	0.529	0.059	1	0	CG13502
shakB	0.000361543	0.507513	1	1	1	0	shakB
Tim17b	0.000400204	0.521919	1	0.706	1	0	Tim17b
nAChRalpha1	0.000405737	0.500367	1	0.735	1	0	nAChRalpha1
CG9328	0.00046571	0.599775	0.706	0.206	1	0	CG9328
CG7582	0.000486821	0.369116	0.412	0.029	1	0	CG7582
rad	0.000496155	0.447757	1	0.588	1	0	rad
CG12541	0.000499104	0.519491	0.765	0.235	1	0	CG12541
Su(z)2	0.000511399	0.524142	0.706	0.176	1	0	Su(z)2
mbl	0.0005214	0.431617	1	0.824	1	0	mbl
sel	0.000537048	0.361494	0.647	0.118	1	0	sel
CG9705	0.000539222	0.541473	1	0.529	1	0	CG9705
CG6959	0.000539222	0.476814	1	0.529	1	0	CG6959
Dhit	0.000566646	0.464187	1	0.912	1	0	Dhit
Nos	0.000587356	0.478914	0.765	0.206	1	0	Nos
twf	0.00058874	0.317198	0.647	0.118	1	0	twf
Glut4EF	0.000592052	0.490984	0.941	0.647	1	0	Glut4EF
Cad87A	0.000602742	0.453009	0.882	0.353	1	0	Cad87A
Men-b	0.000604381	0.364042	0.706	0.147	1	0	Men-b
pho	0.000606866	0.337192	1	0.382	1	0	pho
CG42540	0.000607251	0.471699	1	0.853	1	0	CG42540
O-fut1	0.00063081	0.291108	0.588	0.088	1	0	O-fut1
CG10804	0.00063508	0.256693	1	0.441	1	0	CG10804
Meltrin	0.00064446	0.362409	0.647	0.147	1	0	Meltrin
eIF1	0.000652086	0.55304	1	0.647	1	0	eIF1
Ace	0.000684647	0.440129	0.882	0.5	1	0	Ace
beat-IIIc	0.000691697	0.295604	1	0.265	1	0	beat-IIIc
CG4629	0.000706984	0.400022	0.471	0.059	1	0	CG4629
eEF2	0.000715048	0.381149	1	0.676	1	0	eEF2
Gprk2	0.000755108	0.611921	1	0.647	1	0	Gprk2
CR31451	0.000760085	0.760799	1	0.941	1	0	CR31451
2mit	0.000819032	0.569692	0.647	0.176	1	0	2mit
Mkrn1	0.000839837	0.426835	0.647	0.147	1	0	Mkrn1
Papst2	0.000845379	0.298128	0.647	0.118	1	0	Papst2
ATP8B	0.000870934	0.344165	0.471	0.059	1	0	ATP8B
CG46339	0.000912454	0.367551	0.588	0.118	1	0	CG46339
nAChRalpha7	0.000940778	0.390048	1	0.882	1	0	nAChRalpha7
lap	0.000952376	0.476351	0.941	0.412	1	0	lap
Faa	0.000965528	0.299758	0.471	0.059	1	0	Faa
PhKgamma	0.00103336	0.55772	0.882	0.412	1	0	PhKgamma
sick	0.00103796	0.608188	0.765	0.324	1	0	sick
Spn55B	0.00106814	0.318171	0.294	0	1	0	Spn55B
CG14075	0.00106814	0.295525	0.294	0	1	0	CG14075
Grik	0.00106814	0.292459	0.294	0	1	0	Grik
Apoltp	0.00106814	0.260498	0.294	0	1	0	Apoltp
CG42327	0.00106814	0.255239	0.294	0	1	0	CG42327
pds5	0.00106956	0.329762	0.471	0.059	1	0	pds5
Sucb	0.00106956	0.317893	0.471	0.059	1	0	Sucb
CG11000	0.00107219	0.497666	0.941	0.382	1	0	CG11000
Syn	0.00108439	0.387606	0.941	0.559	1	0	Syn
Axud1	0.00109803	0.410286	0.706	0.176	1	0	Axud1
rdgA	0.00113065	0.371194	1	0.735	1	0	rdgA
CG43902	0.00114583	0.312567	1	0.441	1	0	CG43902
Ipp	0.00115457	0.557808	0.765	0.353	1	0	Ipp
CG16758	0.00118388	0.268256	0.471	0.059	1	0	CG16758
CG14135	0.00118388	0.259369	0.471	0.059	1	0	CG14135
qkr54B	0.00118621	0.344744	0.647	0.147	1	0	qkr54B
CG13054	0.00119889	0.408184	0.824	0.324	1	0	CG13054
SdhD	0.00122177	0.369238	1	0.618	1	0	SdhD
CG11319	0.00125015	0.46524	1	0.5	1	0	CG11319
kek3	0.00125015	0.443269	1	0.5	1	0	kek3
EndoB	0.00128514	0.327397	0.882	0.353	1	0	EndoB
Sur-8	0.00129391	0.290995	0.706	0.176	1	0	Sur-8
CG34155	0.00130941	0.264916	0.471	0.059	1	0	CG34155
GluClalpha	0.00132943	0.288142	1	0.824	1	0	GluClalpha
dnc	0.00134089	0.42986	1	0.971	1	0	dnc
CG42265	0.00139485	0.436046	1	0.735	1	0	CG42265
TBCC	0.00142688	0.310374	0.588	0.118	1	0	TBCC
CG11444	0.00144496	0.397383	0.882	0.294	1	0	CG11444
CG10483	0.00145141	0.26598	0.529	0.088	1	0	CG10483
dpr13	0.00161514	0.369356	1	0.618	1	0	dpr13
CG43778	0.00166068	0.303868	0.647	0.147	1	0	CG43778
Ppcs	0.00167552	0.288708	0.765	0.206	1	0	Ppcs
Drl-2	0.00171949	0.320114	0.882	0.353	1	0	Drl-2
Ktl	0.00174006	0.483887	0.706	0.206	1	0	Ktl
Snoo	0.00178573	0.338399	0.706	0.176	1	0	Snoo
cpa	0.00178573	0.310966	0.706	0.176	1	0	cpa
CG14591	0.00180138	0.282792	0.882	0.294	1	0	CG14591
Xrp1	0.00185061	0.289742	0.882	0.382	1	0	Xrp1
smog	0.00185643	0.410095	0.941	0.441	1	0	smog
CG12502	0.0020184	0.279997	0.588	0.118	1	0	CG12502
CG8273	0.00212129	0.311454	0.353	0.029	1	0	CG8273
D19A	0.00212129	0.283871	0.353	0.029	1	0	D19A
eIF3g1	0.00218181	0.495514	1	0.5	1	0	eIF3g1
dpr1	0.00226161	0.257925	0.706	0.176	1	0	dpr1
Las	0.00227322	0.323781	0.412	0.059	1	0	Las
eIF3c	0.00228539	0.394659	0.882	0.353	1	0	eIF3c
CG31678	0.00230455	0.278548	0.647	0.147	1	0	CG31678
Cisd2	0.00234733	0.370955	1	0.676	1	0	Cisd2
MFS3	0.00237125	0.281815	0.353	0.029	1	0	MFS3
CG42336	0.00239193	0.27742	0.588	0.118	1	0	CG42336
CG30122	0.00245377	0.531529	0.706	0.235	1	0	CG30122
DCP1	0.00246867	0.292517	0.471	0.088	1	0	DCP1
Nmdar2	0.00260302	0.367975	0.765	0.235	1	0	Nmdar2
CG2082	0.00267769	0.443749	0.588	0.147	1	0	CG2082
Apf	0.00276743	0.328006	0.882	0.294	1	0	Apf
Dop1R2	0.0027718	0.512511	0.941	0.647	1	0	Dop1R2
CG31140	0.00280911	0.457558	1	0.882	1	0	CG31140
sesB	0.00281284	0.345411	1	0.912	1	0	sesB
Sik3	0.0029763	0.385714	0.706	0.206	1	0	Sik3
Dak1	0.00304674	0.28373	0.941	0.5	1	0	Dak1
Gtp-bp	0.00306239	0.268022	0.529	0.118	1	0	Gtp-bp
Clk	0.00306724	0.5528	0.647	0.265	1	0	Clk
nocte	0.00319232	0.41962	1	0.853	1	0	nocte
spab	0.00325959	0.463949	0.941	0.529	1	0	spab
CG17075	0.00330094	0.433331	0.706	0.235	1	0	CG17075
CG10479	0.00337086	0.272111	0.412	0.059	1	0	CG10479
CG6364	0.00354475	0.306813	0.471	0.088	1	0	CG6364
l(1)G0156	0.00355446	0.393189	1	0.735	1	0	l(1)G0156
Vha26	0.00360299	0.500877	1	0.794	1	0	Vha26
Liprin-alpha	0.00363482	0.328313	0.765	0.265	1	0	Liprin-alpha
CG6329	0.00364578	0.342251	1	0.971	1	0	CG6329
CG34113	0.00365755	0.355123	1	0.353	1	0	CG34113
Syx16	0.0038066	0.33515	0.647	0.176	1	0	Syx16
DopEcR	0.00386944	0.324387	1	0.853	1	0	DopEcR
CG7879	0.00387337	0.285545	0.471	0.088	1	0	CG7879
CG42594	0.00390711	0.359231	0.941	0.441	1	0	CG42594
msi	0.00401329	0.337316	1	0.588	1	0	msi
Vta1	0.00401759	0.335582	0.765	0.235	1	0	Vta1
Ddc	0.00403695	0.368231	1	0.412	1	0	Ddc
EndoA	0.0040399	0.319719	0.941	0.382	1	0	EndoA
Drp1	0.00404702	0.479121	0.824	0.324	1	0	Drp1
pHCl-1	0.00409064	0.339238	1	0.618	1	0	pHCl-1
l(2)tid	0.00416241	0.397036	0.706	0.265	1	0	l(2)tid
Syngr	0.00427615	0.267332	0.529	0.118	1	0	Syngr
CG1907	0.00432268	0.364161	0.588	0.176	1	0	CG1907
tutl	0.00433399	0.437733	1	0.765	1	0	tutl
RpS20	0.00439966	0.390105	1	0.882	1	0	RpS20
Hk	0.00442949	0.308297	1	0.647	1	0	Hk
unc-13-4A	0.00445031	0.408216	0.941	0.441	1	0	unc-13-4A
Cyt-c-p	0.00466057	0.481312	1	0.824	1	0	Cyt-c-p
CG12290	0.00467222	0.318331	0.588	0.147	1	0	CG12290
Fmr1	0.00479027	0.250206	0.706	0.265	1	0	Fmr1
Atx2	0.00480283	0.423845	0.941	0.529	1	0	Atx2
CG7430	0.00480587	0.484701	0.706	0.294	1	0	CG7430
CG13937	0.0048247	0.345457	0.882	0.324	1	0	CG13937
brp	0.00483358	0.464021	1	0.706	1	0	brp
Pp1alpha-96A	0.00487721	0.39134	1	0.735	1	0	Pp1alpha-96A
CG4364	0.00504744	0.251966	0.588	0.147	1	0	CG4364
Ndae1	0.00515672	0.380898	0.882	0.353	1	0	Ndae1
faf	0.0055111	0.293896	0.765	0.265	1	0	faf
dikar	0.00566285	0.438549	0.765	0.294	1	0	dikar
alc	0.00573285	0.457521	0.941	0.588	1	0	alc
Gapdh1	0.00575868	0.415805	1	0.676	1	0	Gapdh1
bif	0.00587467	0.328747	0.824	0.353	1	0	bif
Rgl	0.00591112	0.267858	0.529	0.118	1	0	Rgl
CG9279	0.00597131	0.37546	0.647	0.206	1	0	CG9279
Eno	0.00609431	0.371675	0.941	0.794	1	0	Eno
CG5355	0.00634212	0.257028	0.588	0.147	1	0	CG5355
CG43293	0.00645166	0.364456	0.412	0.088	1	0	CG43293
tyf	0.00655237	0.343763	0.882	0.412	1	0	tyf
wdb	0.00657497	0.382351	1	0.706	1	0	wdb
syd	0.00670123	0.318553	0.706	0.235	1	0	syd
CG2747	0.00688088	0.327708	0.647	0.206	1	0	CG2747
Reps	0.0070184	0.256884	0.294	0.029	1	0	Reps
COX5B	0.00719382	0.300209	1	0.912	1	0	COX5B
CG7382	0.00722082	0.349774	0.706	0.265	1	0	CG7382
Zcchc7	0.00750251	0.334302	0.471	0.118	1	0	Zcchc7
CG3961	0.00767029	0.352666	0.412	0.088	1	0	CG3961
Reep1	0.00784096	0.292913	0.941	0.441	1	0	Reep1
Pdfr	0.00806209	0.33308	1	0.618	1	0	Pdfr
Vha55	0.00808178	0.38353	0.882	0.588	1	0	Vha55
tadr	0.00835383	0.313228	0.412	0.088	1	0	tadr
CngB	0.00835383	0.281801	0.412	0.088	1	0	CngB
Dhpr	0.0084179	0.369443	1	0.588	1	0	Dhpr
Vha36-1	0.00847449	0.26566	1	0.765	1	0	Vha36-1
CG43729	0.00847449	0.254445	1	0.765	1	0	CG43729
retm	0.00849406	0.251747	0.647	0.176	1	0	retm
CG42671	0.00853592	0.348869	0.529	0.147	1	0	CG42671
CG34384	0.00858388	0.360169	0.882	0.353	1	0	CG34384
RIC-3	0.00861249	0.353511	0.824	0.353	1	0	RIC-3
Cngl	0.00893122	0.251006	1	0.735	1	0	Cngl
CG6767	0.00905241	0.263537	0.882	0.382	1	0	CG6767
cert	0.00909134	0.257598	0.412	0.088	1	0	cert
Pgk	0.00910618	0.403096	0.882	0.588	1	0	Pgk
CR18166	0.0092118	0.273864	0.353	0.059	1	0	CR18166
Atf3	0.0092118	0.270501	0.353	0.059	1	0	Atf3
sNPF-R	0.0092118	0.259991	0.353	0.059	1	0	sNPF-R
Pur-alpha	0.00944616	0.282182	0.882	0.5	1	0	Pur-alpha
ox	0.00947421	0.364454	1	0.588	1	0	ox
FoxK	0.00951257	0.250307	0.471	0.118	1	0	FoxK
CG8602	0.00967542	0.38639	0.765	0.324	1	0	CG8602
Rop	0.00986628	0.380706	1	0.676	1	0	Rop
CG11975	0.00988645	0.265992	0.412	0.088	1	0	CG11975
CG32368	0.00988645	0.264649	0.412	0.088	1	0	CG32368
CG341131	2.00315e-06	1.7136	1	0.476	0.0279098	1	CG34113
Dscam4	9.19689e-06	1.06796	1	0.952	0.12814	1	Dscam4
klg	2.26047e-05	0.907569	1	1	0.314952	1	klg
CG425941	2.75735e-05	1.33681	1	0.524	0.384182	1	CG42594
Fur1	5.81495e-05	1.32706	1	0.833	0.810196	1	Fur1
dpr131	7.85037e-05	1.38266	1	0.69	1	1	dpr13
rdgA1	8.60323e-05	1.28372	1	0.786	1	1	rdgA
Nrx-1	0.00011021	1.35045	1	0.952	1	1	Nrx-1
beat-IIIc1	0.000160249	1.43216	0.889	0.429	1	1	beat-IIIc
Rim	0.000164325	0.915192	1	0.929	1	1	Rim
beat-Ia1	0.000197164	1.31461	1	0.476	1	1	beat-Ia
CG452631	0.000254783	1.56016	1	0.524	1	1	CG45263
sif	0.000398037	1.14757	0.889	0.667	1	1	sif
beat-Ib	0.000416532	1.28996	0.778	0.381	1	1	beat-Ib
shakB1	0.000471889	0.711289	1	1	1	1	shakB
nAChRbeta1	0.000680313	0.869798	0.889	1	1	1	nAChRbeta1
CG12163	0.00071992	1.15352	0.889	0.81	1	1	CG12163
kirre	0.000732902	1.15754	0.889	0.857	1	1	kirre
Ptp99A	0.000776353	0.913857	0.889	0.929	1	1	Ptp99A
Pka-C1	0.000813818	0.647445	1	0.952	1	1	Pka-C1
Prosap	0.000889455	0.687802	1	1	1	1	Prosap
CG42750	0.00094073	1.37708	0.889	0.738	1	1	CG42750
GluClalpha1	0.001198	1.1196	0.889	0.881	1	1	GluClalpha
Ggamma30A1	0.0012619	0.892597	1	0.952	1	1	Ggamma30A
CG31030	0.00126222	0.809204	1	0.976	1	1	CG31030
rad1	0.00139477	1.24563	0.889	0.69	1	1	rad
Diap1	0.00147759	0.577634	0.889	0.857	1	1	Diap1
Imp	0.00149827	0.593668	0.889	1	1	1	Imp
sra1	0.00153103	1.15253	0.889	0.5	1	1	sra
CG7781	0.00156294	0.359825	0.889	0.976	1	1	CG7781
CG69591	0.0015654	1.07113	0.889	0.643	1	1	CG6959
Wnt10	0.00193372	1.19085	0.333	0.024	1	1	Wnt10
CG437291	0.00297172	1.00241	0.889	0.833	1	1	CG43729
vri	0.00352406	0.758592	0.889	0.881	1	1	vri
sdt	0.003979	0.991298	0.889	0.905	1	1	sdt
dnc1	0.00399466	0.687338	1	0.976	1	1	dnc
CG134081	0.00435076	1.12454	0.778	0.429	1	1	CG13408
Sh	0.00466415	1.08027	0.889	0.952	1	1	Sh
GCS2alpha	0.00482551	0.953373	0.778	0.786	1	1	GCS2alpha
CG9919	0.00544011	0.873319	1	0.952	1	1	CG9919
PlexA	0.00573629	1.30047	0.778	0.833	1	1	PlexA
AstA1	0.0064797	0.779702	1	0.405	1	1	AstA
Osi4	0.00682441	0.910725	0.333	0.048	1	1	Osi4
CG108041	0.00689137	1.3239	0.778	0.595	1	1	CG10804
Mob2	0.00697627	1.03015	0.778	0.667	1	1	Mob2
Rh71	0.00709954	1.1664	0.778	0.524	1	1	Rh7
svr	0.00723215	1.08259	0.778	0.857	1	1	svr
CG42402	0.008178	1.23276	0.778	0.786	1	1	CG42402
Lar	0.00818389	0.907161	0.889	0.929	1	1	Lar
CG311761	0.00854016	1.28647	0.667	0.357	1	1	CG31176
mbl1	0.00876318	0.915908	0.889	0.881	1	1	mbl
CG31324	0.00881517	0.764699	0.889	0.976	1	1	CG31324
bi	5.23468e-11	2.25942	1	0	7.29348e-07	2	bi
CG13950	2.02266e-10	1.87243	0.96	0	2.81818e-06	2	CG13950
CG33543	2.31025e-10	2.67017	1	0.192	3.21887e-06	2	CG33543
Fkbp14	3.15385e-10	2.76091	0.96	0.038	4.39426e-06	2	Fkbp14
toy	3.83481e-10	1.64758	1	0.077	5.34304e-06	2	toy
pros	4.02841e-10	3.71563	1	0.308	5.61278e-06	2	pros
ct	7.44517e-10	1.36606	0.92	0	1.03733e-05	2	ct
Bx	9.64312e-10	1.88757	1	0.346	1.34358e-05	2	Bx
Rbfox1	1.72857e-09	1.14069	1	0.846	2.40841e-05	2	Rbfox1
hth	2.30554e-09	1.82413	1	0.577	3.21231e-05	2	hth
CG42342	2.58402e-09	1.47451	1	0.692	3.60032e-05	2	CG42342
CG31221	7.83395e-09	1.28952	1	0.654	0.00010915	2	CG31221
betaTub56D	1.33963e-08	1.07374	1	1	0.00018665	2	betaTub56D
GstD1	2.82194e-08	2.22467	0.8	0	0.000393181	2	GstD1
CG42674	3.23168e-08	1.13464	1	0.538	0.00045027	2	CG42674
CG11317	5.77774e-08	1.33702	0.8	0.038	0.000805012	2	CG11317
Hsp23	6.72758e-08	0.877288	1	0.962	0.000937354	2	Hsp23
HnRNP-K	7.19797e-08	1.55879	0.96	0.577	0.00100289	2	HnRNP-K
Hsp67Bc	7.47111e-08	0.72089	1	0.962	0.00104095	2	Hsp67Bc
Con	8.62061e-08	0.929956	1	0.423	0.00120111	2	Con
VAChT	8.69852e-08	1.05287	0.76	0	0.00121196	2	VAChT
cry	9.83825e-08	1.15064	1	0.731	0.00137076	2	cry
cmpy	1.01714e-07	1.10358	0.96	0.731	0.00141718	2	cmpy
Sdc	1.38762e-07	0.954289	1	0.885	0.00193337	2	Sdc
Fili	2.57547e-07	1.18426	0.72	0	0.0035884	2	Fili
Ac78C	2.57547e-07	1.1755	0.72	0	0.0035884	2	Ac78C
Fer2	2.57547e-07	1.08374	0.72	0	0.0035884	2	Fer2
CR44024	2.57547e-07	1.05565	0.72	0	0.0035884	2	CR44024
Hr51	3.83009e-07	1.1477	0.76	0.077	0.00533647	2	Hr51
CG11768	4.08574e-07	0.864672	0.88	0.154	0.00569267	2	CG11768
CG42673	4.6759e-07	1.19253	0.92	0.231	0.00651493	2	CG42673
mAChR-B	5.92159e-07	1.21236	0.72	0.038	0.00825056	2	mAChR-B
dpr15	7.33627e-07	1.08415	0.68	0	0.0102216	2	dpr15
app	7.33627e-07	1.08046	0.68	0	0.0102216	2	app
oaf	7.40866e-07	1.01712	0.72	0.038	0.0103225	2	oaf
kek1	9.00179e-07	0.836469	1	0.769	0.0125422	2	kek1
Pde9	9.36913e-07	1.28318	0.8	0.231	0.013054	2	Pde9
nAChRalpha5	1.11195e-06	0.746832	1	0.962	0.0154927	2	nAChRalpha5
Gfrl	1.13888e-06	1.04906	0.92	0.346	0.015868	2	Gfrl
CG30172	1.62393e-06	0.515551	1	1	0.0226263	2	CG30172
CG43324	1.9543e-06	0.690925	1	0.885	0.0272293	2	CG43324
CG42747	2.01368e-06	0.793514	0.64	0	0.0280566	2	CG42747
DIP-delta	2.26473e-06	0.979711	0.96	0.654	0.0315545	2	DIP-delta
alphaTub84B	2.3587e-06	0.6986	1	1	0.0328637	2	alphaTub84B
kug	2.52739e-06	0.950091	0.8	0.154	0.0352141	2	kug
beat-IV	2.97075e-06	0.960613	0.92	0.385	0.0413915	2	beat-IV
Tsp66E	3.07773e-06	0.710316	1	0.808	0.042882	2	Tsp66E
CG14762	3.49086e-06	0.976219	0.88	0.308	0.0486381	2	CG14762
Fas3	4.8853e-06	0.889497	1	0.885	0.0680669	2	Fas3
Proc	5.33435e-06	1.2258	0.6	0	0.0743235	2	Proc
side	5.86098e-06	1.13243	0.92	0.577	0.081661	2	side
CG32700	6.15369e-06	0.94455	0.76	0.231	0.0857393	2	CG32700
tsr	9.06515e-06	0.676966	1	0.846	0.126305	2	tsr
CCKLR-17D3	1.36593e-05	0.735236	0.56	0	0.190315	2	CCKLR-17D3
CG33143	1.38282e-05	1.19424	0.84	0.346	0.192668	2	CG33143
stai	1.97356e-05	0.496299	1	0.923	0.274976	2	stai
eIF4A	2.14801e-05	0.403908	1	1	0.299282	2	eIF4A
CG15168	2.36353e-05	0.734391	0.92	0.577	0.329311	2	CG15168
dlg1	2.42559e-05	0.694952	0.96	0.885	0.337957	2	dlg1
CG14715	2.55568e-05	0.866809	0.8	0.385	0.356082	2	CG14715
cib	2.85133e-05	0.730808	1	0.654	0.397276	2	cib
CG34357	3.1627e-05	0.760866	0.84	0.269	0.440659	2	CG34357
SkpA	3.21039e-05	0.542258	1	0.769	0.447303	2	SkpA
CG3967	3.36649e-05	0.799877	0.96	0.692	0.469053	2	CG3967
CG12643	3.38619e-05	0.734767	0.52	0	0.471798	2	CG12643
St3	3.43989e-05	0.630784	0.8	0.231	0.47928	2	St3
tai	3.45743e-05	0.829051	0.92	0.538	0.481723	2	tai
dpr10	3.81678e-05	0.688098	0.56	0.038	0.531791	2	dpr10
Hr4	5.02866e-05	0.631756	0.96	0.808	0.700643	2	Hr4
ringer	5.06352e-05	0.853353	0.96	0.692	0.705499	2	ringer
CG14321	7.27089e-05	0.707125	0.92	0.654	1	2	CG14321
CG11221	7.47524e-05	1.02659	0.6	0.115	1	2	CG11221
GILT1	7.48683e-05	0.723149	0.88	0.538	1	2	GILT1
mam	7.49482e-05	0.666616	0.96	0.808	1	2	mam
CG15237	7.854e-05	0.702812	0.8	0.346	1	2	CG15237
Lmpt	9.43447e-05	0.878715	0.56	0.077	1	2	Lmpt
bsk	9.55878e-05	0.475715	0.96	0.692	1	2	bsk
RpL37a	9.98285e-05	0.46821	1	0.923	1	2	RpL37a
RpL34b	0.000107873	0.421971	1	0.923	1	2	RpL34b
fabp	0.000133238	0.634658	0.96	0.769	1	2	fabp
plum	0.00013779	0.647947	0.76	0.308	1	2	plum
dpr16	0.000141709	0.754012	0.68	0.231	1	2	dpr16
CG13739	0.000156113	0.885151	0.76	0.269	1	2	CG13739
CG13551	0.000158123	0.562562	1	0.923	1	2	CG13551
nvy	0.000175161	0.888055	0.76	0.308	1	2	nvy
CG1648	0.000176697	0.746086	0.52	0.038	1	2	CG1648
Ac13E	0.000190039	0.533245	0.44	0	1	2	Ac13E
CR45358	0.000190039	0.420006	0.44	0	1	2	CR45358
LRP1	0.000223613	0.598262	0.64	0.154	1	2	LRP1
Prosalpha2	0.000242746	0.660225	0.92	0.615	1	2	Prosalpha2
CG3760	0.00024947	0.506784	0.72	0.346	1	2	CG3760
Hsp26	0.000263405	0.557167	1	0.769	1	2	Hsp26
RpS16	0.000266384	0.400753	1	0.962	1	2	RpS16
whd	0.000274112	0.469402	0.52	0.077	1	2	whd
CG5554	0.000276373	0.72736	0.88	0.577	1	2	CG5554
CG15894	0.000290244	0.785563	0.68	0.269	1	2	CG15894
CG5532	0.000311666	0.812296	0.76	0.462	1	2	CG5532
alphaTub84D	0.000320517	0.61593	0.88	0.5	1	2	alphaTub84D
CG8405	0.000357774	0.626198	0.84	0.538	1	2	CG8405
beat-Va	0.00036719	0.622434	0.68	0.269	1	2	beat-Va
RpL38	0.000376159	0.610001	1	0.731	1	2	RpL38
CG15387	0.000407895	0.665506	0.64	0.231	1	2	CG15387
CG42394	0.000424478	0.630327	0.88	0.615	1	2	CG42394
CR44663	0.000431636	0.759261	0.4	0	1	2	CR44663
ChAT	0.000431636	0.455753	0.4	0	1	2	ChAT
CG17508	0.000462893	0.636492	0.72	0.231	1	2	CG17508
CG1542	0.000477247	0.575146	0.64	0.231	1	2	CG1542
Prosbeta3	0.000495606	0.619269	0.84	0.577	1	2	Prosbeta3
Act5C	0.000544955	0.490359	1	0.923	1	2	Act5C
Alg-2	0.000563958	0.649639	0.88	0.615	1	2	Alg-2
CG11191	0.000564849	0.622386	0.76	0.423	1	2	CG11191
CG13751	0.000634766	0.597949	0.84	0.538	1	2	CG13751
CG13994	0.00063849	0.543443	0.48	0.077	1	2	CG13994
Cbs	0.00063849	0.484485	0.48	0.077	1	2	Cbs
CR43241	0.000695537	0.546102	0.56	0.115	1	2	CR43241
CG13827	0.000695537	0.519307	0.56	0.115	1	2	CG13827
CG11899	0.000695537	0.37272	0.56	0.115	1	2	CG11899
VhaM9.7-a	0.000736997	0.539591	0.96	0.808	1	2	VhaM9.7-a
CG7484	0.00075183	0.542615	0.88	0.577	1	2	CG7484
Vps16A	0.000760491	0.481661	0.48	0.077	1	2	Vps16A
atms	0.000793479	0.561416	0.52	0.115	1	2	atms
mats	0.00082933	0.572451	0.56	0.154	1	2	mats
CG44153	0.000838414	0.468793	0.8	0.346	1	2	CG44153
MED7	0.000857275	0.579158	0.8	0.5	1	2	MED7
snRNP-U1-C	0.000899706	0.518939	0.72	0.423	1	2	snRNP-U1-C
Oamb	0.000900889	0.491101	0.68	0.346	1	2	Oamb
SKIP	0.000903849	0.650772	0.48	0.077	1	2	SKIP
Rap2l	0.000928482	0.543828	0.76	0.346	1	2	Rap2l
comm	0.000947702	0.381552	0.6	0.192	1	2	comm
Cht6	0.000955446	0.652555	0.36	0	1	2	Cht6
CG15630	0.000955446	0.455599	0.36	0	1	2	CG15630
msn	0.000986226	0.745687	0.76	0.462	1	2	msn
RpL28	0.00100913	0.359328	1	0.962	1	2	RpL28
corto	0.00102056	0.554356	0.96	0.731	1	2	corto
Ptpmeg2	0.00103438	0.568711	0.96	0.577	1	2	Ptpmeg2
RpS14b	0.00106345	0.521872	0.8	0.615	1	2	RpS14b
RpL13A	0.00119138	0.324914	0.96	0.962	1	2	RpL13A
CCT8	0.00119186	0.508776	0.52	0.077	1	2	CCT8
Pka-R2	0.00120933	0.630031	0.88	0.577	1	2	Pka-R2
CG33639	0.00122852	0.473359	1	0.846	1	2	CG33639
5-HT2A	0.00132538	0.63575	0.56	0.154	1	2	5-HT2A
robl	0.00132839	0.557016	0.88	0.692	1	2	robl
lbk	0.00133461	0.881034	0.76	0.538	1	2	lbk
pck	0.00139815	0.4472	0.4	0.038	1	2	pck
chrb	0.00140399	0.454678	1	0.923	1	2	chrb
Bet1	0.00154158	0.341488	0.56	0.115	1	2	Bet1
Tfb1	0.00156884	0.437124	0.44	0.077	1	2	Tfb1
CG11781	0.00158652	0.603637	0.76	0.462	1	2	CG11781
mRpS10	0.00166433	0.530923	0.88	0.615	1	2	mRpS10
Prosbeta6	0.00169561	0.513151	0.76	0.462	1	2	Prosbeta6
shams	0.00176504	0.307617	0.48	0.077	1	2	shams
eIF2gamma	0.00190245	0.438426	0.68	0.308	1	2	eIF2gamma
CBP	0.00191476	0.441972	0.52	0.115	1	2	CBP
RpS3A	0.00193817	0.393341	1	0.962	1	2	RpS3A
Prosalpha7	0.00202881	0.54226	0.84	0.423	1	2	Prosalpha7
Flo1	0.00206047	0.662297	0.8	0.577	1	2	Flo1
CG7708	0.00206512	0.538198	0.32	0	1	2	CG7708
CG4168	0.00206512	0.535502	0.32	0	1	2	CG4168
CG31323	0.00206512	0.360617	0.32	0	1	2	CG31323
CG14561	0.00206512	0.345373	0.32	0	1	2	CG14561
Prosbeta5	0.00213909	0.456323	0.96	0.692	1	2	Prosbeta5
CG17600	0.00224331	0.432783	0.52	0.192	1	2	CG17600
LpR1	0.00225661	0.835357	0.76	0.538	1	2	LpR1
mbf1	0.00233503	0.485888	0.92	0.615	1	2	mbf1
klar	0.00237094	0.568669	0.92	0.654	1	2	klar
Syx6	0.00243109	0.495961	0.64	0.308	1	2	Syx6
UQCR-11	0.0024931	0.321698	1	1	1	2	UQCR-11
mago	0.0026007	0.291863	0.68	0.269	1	2	mago
Arl4	0.00261979	0.455994	0.96	0.769	1	2	Arl4
Hr3	0.00265752	0.463518	0.8	0.538	1	2	Hr3
CG8726	0.00267434	0.604674	0.76	0.462	1	2	CG8726
HP1c	0.00278512	0.417692	0.64	0.269	1	2	HP1c
CG13920	0.00281948	0.314704	0.96	0.923	1	2	CG13920
Rtnl1	0.00282197	0.352438	1	0.962	1	2	Rtnl1
Glut1	0.00285873	0.508289	1	0.577	1	2	Glut1
spidey	0.0029967	0.460819	0.92	0.615	1	2	spidey
Oda	0.00300019	0.306286	1	0.923	1	2	Oda
l(1)10Bb	0.00300023	0.501451	0.52	0.192	1	2	l(1)10Bb
MRE16	0.00300085	0.496925	1	0.962	1	2	MRE16
Tspo	0.0030119	0.543683	0.72	0.423	1	2	Tspo
tara	0.00308925	0.433495	0.68	0.346	1	2	tara
Arf102F	0.0031328	0.552856	0.88	0.615	1	2	Arf102F
CG1105	0.00318656	0.502448	0.36	0.038	1	2	CG1105
btsz	0.00318656	0.444839	0.36	0.038	1	2	btsz
p38b	0.00318656	0.330544	0.36	0.038	1	2	p38b
RpS27	0.00318932	0.328883	1	0.923	1	2	RpS27
schlank	0.00322965	0.3276	0.96	0.731	1	2	schlank
CG10674	0.00333119	0.433196	0.88	0.615	1	2	CG10674
CG15432	0.00350107	0.431468	0.48	0.154	1	2	CG15432
Spf45	0.00363733	0.477826	0.64	0.269	1	2	Spf45
TppII	0.00371357	0.535521	0.52	0.192	1	2	TppII
CG10395	0.00371573	0.429663	0.4	0.077	1	2	CG10395
CG11857	0.00371573	0.418175	0.4	0.077	1	2	CG11857
CG3164	0.00371573	0.387194	0.4	0.077	1	2	CG3164
CG8498	0.00378008	0.460639	0.92	0.808	1	2	CG8498
CG32243	0.00382	0.533347	0.64	0.346	1	2	CG32243
Pak3	0.00385728	0.412397	0.84	0.5	1	2	Pak3
Dyb	0.00386622	0.454626	0.64	0.308	1	2	Dyb
Pldn	0.00388279	0.475305	0.44	0.115	1	2	Pldn
CG11555	0.00405143	0.445623	0.48	0.154	1	2	CG11555
DCTN3-p24	0.00412475	0.407637	0.64	0.308	1	2	DCTN3-p24
dpr21	0.0042359	0.438761	0.92	0.769	1	2	dpr21
brat	0.00426023	0.536715	0.96	0.769	1	2	brat
CG12594	0.00427513	0.502899	0.8	0.423	1	2	CG12594
chic	0.00430038	0.435865	1	0.846	1	2	chic
CG11791	0.00436797	0.344725	0.28	0	1	2	CG11791
5-HT7	0.00436797	0.304457	0.28	0	1	2	5-HT7
CCHa2-R	0.00436797	0.286226	0.28	0	1	2	CCHa2-R
Phf5a	0.00457069	0.440264	0.6	0.308	1	2	Phf5a
sqh	0.0046397	0.481816	0.92	0.654	1	2	sqh
Prosalpha3	0.00491056	0.399954	0.96	0.731	1	2	Prosalpha3
CG13364	0.00498305	0.358549	0.96	0.885	1	2	CG13364
Adf1	0.00498853	0.411101	0.56	0.269	1	2	Adf1
fdl	0.00502502	0.494192	0.48	0.154	1	2	fdl
CG7646	0.00512075	0.466036	0.96	0.846	1	2	CG7646
ics	0.00520501	0.413596	0.8	0.5	1	2	ics
CG33170	0.00528305	0.523777	0.84	0.615	1	2	CG33170
Fas1	0.00532321	0.525253	0.64	0.308	1	2	Fas1
flw	0.00560203	0.577818	0.84	0.615	1	2	flw
CG9391	0.00560456	0.35579	0.72	0.423	1	2	CG9391
Calr	0.00575125	0.391978	0.96	0.846	1	2	Calr
COX8	0.00576227	0.34952	1	0.846	1	2	COX8
Rpn9	0.00581904	0.588133	0.68	0.423	1	2	Rpn9
CG17272	0.00593071	0.349954	0.96	0.885	1	2	CG17272
RpL11	0.00601854	0.444034	1	0.692	1	2	RpL11
CR45009	0.00607413	0.599723	0.44	0.115	1	2	CR45009
RpLP0	0.00609204	0.453319	1	0.808	1	2	RpLP0
Urm1	0.00620549	0.449004	0.48	0.154	1	2	Urm1
drl	0.00637332	0.430824	0.56	0.231	1	2	drl
cpo	0.00647021	0.331483	1	0.885	1	2	cpo
CG9723	0.00653234	0.472844	0.44	0.115	1	2	CG9723
Wdr62	0.00653419	0.624541	0.8	0.615	1	2	Wdr62
CG7946	0.00656767	0.438351	0.64	0.385	1	2	CG7946
CG13594	0.00665124	0.401442	0.48	0.154	1	2	CG13594
Dip-B	0.00686873	0.480015	0.52	0.231	1	2	Dip-B
CG6178	0.00706636	0.353084	0.32	0.038	1	2	CG6178
Rbp1-like	0.00717898	0.419937	0.96	0.769	1	2	Rbp1-like
RpL9	0.0072526	0.272881	1	0.962	1	2	RpL9
exd	0.00732874	0.355192	0.84	0.577	1	2	exd
cwo	0.00736931	0.52583	0.76	0.5	1	2	cwo
galectin	0.0074088	0.606722	0.64	0.385	1	2	galectin
RpL34a	0.00762249	0.493367	1	0.769	1	2	RpL34a
ebd2	0.00769091	0.405436	0.32	0.038	1	2	ebd2
Gpb5	0.0077149	0.567625	0.64	0.308	1	2	Gpb5
Arpc4	0.00779994	0.392427	0.88	0.692	1	2	Arpc4
CG42797	0.00781338	0.372086	0.6	0.385	1	2	CG42797
CG5339	0.00783701	0.303483	0.6	0.269	1	2	CG5339
dpr17	0.00809932	0.368868	0.44	0.115	1	2	dpr17
roX2	0.00823335	0.98102	0.56	0.231	1	2	roX2
Rgk1	0.00823335	0.50754	0.56	0.231	1	2	Rgk1
CG42389	0.00826661	0.818451	0.68	0.577	1	2	CG42389
Syp	0.00828906	0.391164	0.96	0.808	1	2	Syp
CG3702	0.00833579	0.446545	0.56	0.308	1	2	CG3702
TyrR	0.00847219	0.445752	0.4	0.115	1	2	TyrR
PGAP3	0.00847219	0.406492	0.4	0.115	1	2	PGAP3
beat-Vc	0.00848906	0.593829	0.36	0.077	1	2	beat-Vc
CG10795	0.00848906	0.474416	0.36	0.077	1	2	CG10795
bru1	0.0085959	0.528598	0.48	0.192	1	2	bru1
Not1	0.00880728	0.38354	0.92	0.692	1	2	Not1
RpII18	0.00880786	0.386627	0.68	0.423	1	2	RpII18
ATPsynE	0.00897615	0.368249	0.96	0.769	1	2	ATPsynE
l(3)neo38	0.00906856	0.476398	0.64	0.346	1	2	l(3)neo38
AIMP1	0.00907975	0.372848	0.44	0.154	1	2	AIMP1
Tsp42Ek	0.00909037	0.383452	0.32	0.038	1	2	Tsp42Ek
AIMP2	0.00909037	0.278486	0.32	0.038	1	2	AIMP2
FK506-bp1	0.00918041	0.371427	0.48	0.192	1	2	FK506-bp1
CadN2	0.00920236	0.480075	0.8	0.423	1	2	CadN2
GstO2	0.00920236	0.40389	0.72	0.5	1	2	GstO2
CG17321	0.00938637	0.379456	0.64	0.385	1	2	CG17321
Glo1	0.00950293	0.359605	0.88	0.615	1	2	Glo1
kune	0.009525	0.509199	0.52	0.192	1	2	kune
CG11858	0.00980491	0.388072	0.6	0.346	1	2	CG11858
dpr4	0.00990535	0.554003	0.6	0.385	1	2	dpr4
