# Supplementary material for: Single-cell transcriptome profiles of Drosophila fruitless-expressing neurons from both sexes
Source: eLife. 2023 Feb 1;12:e78511. doi: 10.7554/eLife.78511 (PMC9891730; doi:10.7554/eLife.78511)
Supplement: Source data 7. — Excel data table containing the number of Clk856 ∩ fru P1 cell bodies per region in adult male and female brains. The DAM data underlying graphs and plots in Figure 7—figure supplement 2. [file elife-78511-data7.xlsx]

## Sheet: README
Source data 7: Clk856 and fru P1 co-expressing neuron cell counts and DAM data
Sheets:
Sheet number	List	Description
1	Unblinded cell counts by genotype and sex	Raw cell count data from both sexes for all genotypes and stages
2	0-24h sm.GDP.myc	Cell counts for 0-24hr adults expressing sm.GDP.myc in Clk856-Gal4 and fru P1 co-expressing neurons
3	4-7d sm.GDP.myc	Cell counts for 4-7 day adults expressing sm.GDP.myc in Clk856-Gal4 and fru P1 co-expressing neurons
4	4-7d TrpA1.myc	Cell counts for 4-7 day adults expressing TrpA1.myc in Clk856-Gal4 and fru P1 co-expressing neurons
5	Average_individual_locomotor	Average locomotor counts per day in LD for individuals of each genotype calculated in ShinyR-DAM (data plotted in Figure 7 - figure supplement 2A)
6	Mean_and_median_actogram	Data for mean and median actograms in LD calculated in ShinyR-DAM. This data was used to generate mean actograms in Figure 7 - figure supplement 2B-C
7	DD_mean_and_median_actogram	Data for mean and median actograms with 2 days in LD prior to the DD shift, followed by 10 days in DD, calculated in ShinyR-DAM. This data was used to generate mean actograms in Figure 7 - figure supplement 3A-B
8	Mean_periodograms	Data for mean periodograms using DD data only calculated in ShinyR-DAM (Figure 7 - figure supplement 3C)
9	Period_peaks_and_strength	Data for individual fly period peaks and period peak strength from DD data calculated in ShinyR-DAM (Figure 7 - figure supplement 3D-E)
	LD= 12hr light:12hr dark
	DD= 12hr dark:12hr dark

## Sheet: 1.Unblinded counts
Image name	DN1 left H	DN1 right H	Potential DN2 left	DN3 cells left Hemisphere	DN3 cells right Hemisphere	LNds left H	LNds right H	SEZ expression	Cell bodies in SEZ	Median bundle	Cell body below median bundle	Faint potential staining of additional LNs
clk856 smGDPmyc 4-7d adult female anti-myc anti-NC82 20X_Render_Series	0	1	0	5	5	0	0	Y	2	Y	1	Y
clk856 smGDPmyc 4-7d adult female anti-myc anti-NC82 20X-2	0	0	0	0	3	0	0	Y	2	Y	3	Y
clk856 smGDPmyc 4-7d adult female anti-myc anti-NC82 20X-3	0	0	0	5	2	1	1	Y	2	N	0	Y
clk856 smGDPmyc 4-7d adult female anti-myc anti-NC82 20X-4	1	1	0	4	5	3	0	Y	0	Y	0	Y
clk856 smGDPmyc 4-7d adult female anti-myc anti-NC82 20X-5	1	0	0	4	4	0	0	Y	1	N	0	Y
clk856 smGDPmyc 4-7d adult male anti-myc anti-NC82 20X	2	2	0	7	6	1	1	Y	3	Y	1	N
clk856 smGDPmyc 4-7d adult male anti-myc anti-NC82 20X-2	1	2	0	4	6	0	1	Y	2	Y	2	Y
clk856 smGDPmyc 4-7d adult male anti-myc anti-NC82 20X-3	1	2	0	0	3	2	1	Y	2	Y	1	Y
clk856 smGDPmyc 4-7d adult male anti-myc anti-NC82 20X-4	0	0	0	0	1	0	0	N	0	Y	1	N
clk856 smGDPmyc 4-7d adult male anti-myc anti-NC82 20X-5	3	2	0	1	4	0	0	Y	2	Y	2	N
clk856 smGDPmyc fruflp 0-24hr female adult anti-myc anti-NC82 20x-1	0	0	0	1	1	0	0	N	0	Y	1	N
clk856 smGDPmyc fruflp 0-24hr female adult anti-myc anti-NC82 20x-2	0	0	0	1	2	0	0	Y	1	Y	1	N
clk856 smGDPmyc fruflp 0-24hr female adult anti-myc anti-NC82 20x-3	0	0	0	2	0	0	0	N	0	Y	0	N
clk856 smGDPmyc fruflp 0-24hr female adult anti-myc anti-NC82 20x-4version2	0	0	0	0	1	0	0	Y	0	N	0	N
clk856 smGDPmyc fruflp 0-24hr female adult anti-myc anti-NC82 20x-5	0	1	0	1	0	0	0	Y	1	Y	0	N
clk856 smGDPmyc fruflp 0-24hr female adult anti-myc anti-NC82 20x-6	0	1	0	0	0	0	0	Y	1	N	0	N
clk856 smGDPmyc fruflp 0-24hr female adult anti-myc anti-NC82 20x-7	3	1	0	2	1	0	0	N	0	Y	2	N
clk856 smGDPmyc fruflp 0-24hr male adult anti-myc anti-NC82 20x-1	1	0	0	3	3	0	1	Y	1	Y	0	N
clk856 smGDPmyc fruflp 0-24hr male adult anti-myc anti-NC82 20x-2	0	0	0	3	3	0	0	Y	0	Y	1	N
clk856 smGDPmyc fruflp 0-24hr male adult anti-myc anti-NC82 20x-3	2	0	0	3	2	0	0	N	0	Y	1	N
clk856 smGDPmyc fruflp 0-24hr male adult anti-myc anti-NC82 20x-4	0	0	0	1	0	0	0	N	0	Y	1	N
clk856 smGDPmyc fruflp 0-24hr male adult anti-myc anti-NC82 20x-5_version2	0	0	0	0	2	0	0	Y	0	Y	1	N
clk856 smGDPmyc fruflp 0-24hr male adult anti-myc anti-NC82 20x-6	0	0	0	0	3	0	0	N	0	N	0	N
clk856 smGDPmyc fruflp 0-24hr male adult anti-myc anti-NC82 20x-7	2	0	0	1	5	0	0	Y	1	Y	2	N
clk856 TrpA1 myc 4-7d adult female anti-myc anti-NC82 20X	1	0	0	0	2	4	1	Y	1	N	0	N
clk856 TrpA1 myc 4-7d adult female anti-myc anti-NC82 20X-10	2	1	0	1	1	3	1	Y	2	N	0	N
clk856 TrpA1 myc 4-7d adult female anti-myc anti-NC82 20X-11	0	0	0	1	0	2	2	Y	1	N	0	N
clk856 TrpA1 myc 4-7d adult female anti-myc anti-NC82 20X-12	1	0	0	0	0	0	2	Y	2	Y	0	N
clk856 TrpA1 myc 4-7d adult female anti-myc anti-NC82 20X-13	1	0	0	1	1	2	1	Y	0	N	0	N
clk856 TrpA1 myc 4-7d adult female anti-myc anti-NC82 20X-2	0	3	1	0	0	0	1	Y	0	N	0	N
clk856 TrpA1 myc 4-7d adult female anti-myc anti-NC82 20X-3	0	0	0	0	0	2	1	Y	0	N	0	N
clk856 TrpA1 myc 4-7d adult female anti-myc anti-NC82 20X-4	0	0	0	1	1	1	0	Y	1	N	0	N
clk856 TrpA1 myc 4-7d adult female anti-myc anti-NC82 20X-5	0	0	0	0	1	2	2	Y	0	N	0	N
clk856 TrpA1 myc 4-7d adult female anti-myc anti-NC82 20X-6	0	1	0	1	1	0	0	Y	3	N	0	N
clk856 TrpA1 myc 4-7d adult female anti-myc anti-NC82 20X-7	1	0	0	3	1	0	1	Y	1	N	0	N
clk856 TrpA1 myc 4-7d adult female anti-myc anti-NC82 20X-8	0	0	0	0	0	0	2	Y	1	Y	1	N
clk856 TrpA1 myc 4-7d adult female anti-myc anti-NC82 20X-9	0	0	0	0	1	2	0	Y	2	N	0	N
clk856 TrpA1 myc 4-7d adult male anti-myc anti-NC82 20X	2	3	0	1	1	1	3	Y	3	N	0	N
clk856 TrpA1 myc 4-7d adult male anti-myc anti-NC82 20X-10	2	0	0	1	1	2	4	Y	1	N	0	N
clk856 TrpA1 myc 4-7d adult male anti-myc anti-NC82 20X-11	0	0	0	1	0	3	3	Y	1	N	1	N
clk856 TrpA1 myc 4-7d adult male anti-myc anti-NC82 20X-2	5	4	0	0	0	3	2	Y	4	Y	1	N
clk856 TrpA1 myc 4-7d adult male anti-myc anti-NC82 20X-3	1	1	0	0	0	4	3	Y	4	Y	1	N
clk856 TrpA1 myc 4-7d adult male anti-myc anti-NC82 20X-4	3	4	0	4	0	0	3	Y	2	N	0	N
clk856 TrpA1 myc 4-7d adult male anti-myc anti-NC82 20X-5	1	2	0	2	4	3	2	Y	2	N	0	N
clk856 TrpA1 myc 4-7d adult male anti-myc anti-NC82 20X-6	1	2	0	3	1	3	3	Y	1	Y	2	N
clk856 TrpA1 myc 4-7d adult male anti-myc anti-NC82 20X-7	0	0	0	0	0	2	4	Y	3	N	1	N
clk856 TrpA1 myc 4-7d adult male anti-myc anti-NC82 20X-8	4	2	0	3	3	1	2	Y	2	Y	2	N
clk856 TrpA1 myc 4-7d adult male anti-myc anti-NC82 20X-9	1	1	1	1	3	3	2	Y	2	N	0	N

## Sheet: 2.0-24h sm.GDP.myc
Image name	DN1 left H	DN1 right H	DN3 cells left Hemisphere	DN3 cells right Hemisphere	LNds left H	LNds right H	SEZ expression	Cell bodies in SEZ	Median bundle	Cell body below median bundle	Faint potential staining of additional LNs
clk856 smGDPmyc fruflp 0-24hr female adult anti-myc anti-NC82 20x-1	0	0	1	1	0	0	N	0	Y	1	N
clk856 smGDPmyc fruflp 0-24hr female adult anti-myc anti-NC82 20x-2	0	0	1	2	0	0	Y	1	Y	1	N
clk856 smGDPmyc fruflp 0-24hr female adult anti-myc anti-NC82 20x-3	0	0	2	0	0	0	N	0	Y	0	N
clk856 smGDPmyc fruflp 0-24hr female adult anti-myc anti-NC82 20x-4version2	0	0	0	1	0	0	Y	0	N	0	N
clk856 smGDPmyc fruflp 0-24hr female adult anti-myc anti-NC82 20x-5	0	1	1	0	0	0	Y	1	Y	0	N
clk856 smGDPmyc fruflp 0-24hr female adult anti-myc anti-NC82 20x-6	0	1	0	0	0	0	Y	1	N	0	N
clk856 smGDPmyc fruflp 0-24hr female adult anti-myc anti-NC82 20x-7	3	1	2	1	0	0	N	0	Y	2	N
Female Range	0-3	0-1	0-2	0-2	0	0	N/A	0-1	N/A	0-2	N/A
Female Average	0.428571	0.428571	1	0.714286	0	0	N/A	0.428571	N/A	0.571429	N/A
clk856 smGDPmyc fruflp 0-24hr male adult anti-myc anti-NC82 20x-1	1	0	3	3	0	1	Y	1	Y	0	N
clk856 smGDPmyc fruflp 0-24hr male adult anti-myc anti-NC82 20x-2	0	0	3	3	0	0	Y	0	Y	1	N
clk856 smGDPmyc fruflp 0-24hr male adult anti-myc anti-NC82 20x-3	2	0	3	2	0	0	N	0	Y	1	N
clk856 smGDPmyc fruflp 0-24hr male adult anti-myc anti-NC82 20x-4	0	0	1	0	0	0	N	0	Y	1	N
clk856 smGDPmyc fruflp 0-24hr male adult anti-myc anti-NC82 20x-5_version2	0	0	0	2	0	0	Y	0	Y	1	N
clk856 smGDPmyc fruflp 0-24hr male adult anti-myc anti-NC82 20x-6	0	0	0	3	0	0	N	0	N	0	N
clk856 smGDPmyc fruflp 0-24hr male adult anti-myc anti-NC82 20x-7	2	0	1	5	0	0	Y	1	Y	2	N
Male Range	0-2	0	0-3	0-5	0	0	N/A	0-1	N/A		N/A
Male Average	0.714286	0	1.57143	2.57143	0	0.142857	N/A	0.285714	N/A	0.857143	N/A

## Sheet: 3.4-7d sm.GDP.myc
Image name	DN1 left H	DN1 right H	DN3 cells left Hemisphere	DN3 cells right Hemisphere	LNds left H	LNds right H	SEZ expression	Cell bodies in SEZ	Median bundle	Cell body below median bundle	Faint potential staining of additional LNs
clk856 smGDPmyc 4-7d adult female anti-myc anti-NC82 20X_Render_Series	0	1	5	5	0	0	Y	2	Y	1	Y
clk856 smGDPmyc 4-7d adult female anti-myc anti-NC82 20X-2	0	0	0	3	0	0	Y	2	Y	3	Y
clk856 smGDPmyc 4-7d adult female anti-myc anti-NC82 20X-3	0	0	5	2	1	1	Y	2	N	0	Y
clk856 smGDPmyc 4-7d adult female anti-myc anti-NC82 20X-4	1	1	4	5	3	0	Y	0	Y	0	Y
clk856 smGDPmyc 4-7d adult female anti-myc anti-NC82 20X-5	1	0	4	4	0	0	Y	1	N	0	Y
Female Range	0-1	0-1	0-5	2-5	0-3	0-1	0	0-2	N/A	0-3	N/A
Female Average	0.4	0.4	3.6	3.8	0.8	0.2	N/A	1.4	N/A	0.8	N/A
clk856 smGDPmyc 4-7d adult male anti-myc anti-NC82 20X	2	2	7	6	1	1	Y	3	Y	1	N
clk856 smGDPmyc 4-7d adult male anti-myc anti-NC82 20X-2	1	2	4	6	0	1	Y	2	Y	2	Y
clk856 smGDPmyc 4-7d adult male anti-myc anti-NC82 20X-3	1	2	0	3	2	1	Y	2	Y	1	Y
clk856 smGDPmyc 4-7d adult male anti-myc anti-NC82 20X-4	0	0	0	1	0	0	N	0	Y	1	N
clk856 smGDPmyc 4-7d adult male anti-myc anti-NC82 20X-5	3	2	1	4	0	0	Y	2	Y	2	N
MaleRange	0-3	0-2	0-7	1-6	0-2	0-1	N/A	0-3	N/A	1-2	N/A
Male Average	1.4	1.6	2.4	4	0.6	0.6	N/A	1.8	N/A	1.4	N/A

## Sheet: 4.4-7d TrpA1.myc
Image name	DN1 left H	DN1 right H	DN3 cells left Hemisphere	DN3 cells right Hemisphere	LNds left H	LNds right H	SEZ expression	Cell bodies in SEZ	Median bundle	Cell body below median bundle	Faint potential staining of additional LNs
clk856 TrpA1 myc 4-7d adult female anti-myc anti-NC82 20X	1	0	0	2	4	1	Y	1	N	0	N
clk856 TrpA1 myc 4-7d adult female anti-myc anti-NC82 20X-10	2	1	1	1	3	1	Y	2	N	0	N
clk856 TrpA1 myc 4-7d adult female anti-myc anti-NC82 20X-11	0	0	1	0	2	2	Y	1	N	0	N
clk856 TrpA1 myc 4-7d adult female anti-myc anti-NC82 20X-12	1	0	0	0	0	2	Y	2	Y	0	N
clk856 TrpA1 myc 4-7d adult female anti-myc anti-NC82 20X-13	1	0	1	1	2	1	Y	0	N	0	N
clk856 TrpA1 myc 4-7d adult female anti-myc anti-NC82 20X-2	0	3	0	0	0	1	Y	0	N	0	N
clk856 TrpA1 myc 4-7d adult female anti-myc anti-NC82 20X-3	0	0	0	0	2	1	Y	0	N	0	N
clk856 TrpA1 myc 4-7d adult female anti-myc anti-NC82 20X-4	0	0	1	1	1	0	Y	1	N	0	N
clk856 TrpA1 myc 4-7d adult female anti-myc anti-NC82 20X-5	0	0	0	1	2	2	Y	0	N	0	N
clk856 TrpA1 myc 4-7d adult female anti-myc anti-NC82 20X-6	0	1	1	1	0	0	Y	3	N	0	N
clk856 TrpA1 myc 4-7d adult female anti-myc anti-NC82 20X-7	1	0	3	1	0	1	Y	1	N	0	N
clk856 TrpA1 myc 4-7d adult female anti-myc anti-NC82 20X-8	0	0	0	0	0	2	Y	1	Y	1	N
clk856 TrpA1 myc 4-7d adult female anti-myc anti-NC82 20X-9	0	0	0	1	2	0	Y	2	N	0	N
Female Range	0-2	0-3	0-3	0-2	0-4	0-2	N/A	0-3	N/A	0-1	N/A
Female Average	0.461538	0.384615	0.615385	0.692308	1.38462	1.07692	N/A	1.07692	N/A	0.0769231	N/A
clk856 TrpA1 myc 4-7d adult male anti-myc anti-NC82 20X	2	3	1	1	1	3	Y	3	N	0	N
clk856 TrpA1 myc 4-7d adult male anti-myc anti-NC82 20X-10	2	0	1	1	2	4	Y	1	N	0	N
clk856 TrpA1 myc 4-7d adult male anti-myc anti-NC82 20X-11	0	0	1	0	3	3	Y	1	N	1	N
clk856 TrpA1 myc 4-7d adult male anti-myc anti-NC82 20X-2	5	4	0	0	3	2	Y	4	Y	1	N
clk856 TrpA1 myc 4-7d adult male anti-myc anti-NC82 20X-3	1	1	0	0	4	3	Y	4	Y	1	N
clk856 TrpA1 myc 4-7d adult male anti-myc anti-NC82 20X-4	3	4	4	0	0	3	Y	2	N	0	N
clk856 TrpA1 myc 4-7d adult male anti-myc anti-NC82 20X-5	1	2	2	4	3	2	Y	2	N	0	N
clk856 TrpA1 myc 4-7d adult male anti-myc anti-NC82 20X-6	1	2	3	1	3	3	Y	1	Y	2	N
clk856 TrpA1 myc 4-7d adult male anti-myc anti-NC82 20X-7	0	0	0	0	2	4	Y	3	N	1	N
clk856 TrpA1 myc 4-7d adult male anti-myc anti-NC82 20X-8	4	2	3	3	1	2	Y	2	Y	2	N
clk856 TrpA1 myc 4-7d adult male anti-myc anti-NC82 20X-9	1	1	1	3	3	2	Y	2	N	0	N
Male Range	0-5	0-4	0-4	0-4	0-4	2-4	N/A	1-4	N/A	0-2	N/A
Male Average	1.81818	1.72727	1.45455	1.18182	2.27273	2.81818	N/A	2.27273	N/A	0.727273	N/A

## Sheet: 5.Average_individual_locomotor
	Condition	variable	Light_cycle	mean_value
1	Trp_Fru_FLP_F	LDclkactCtM001_ch1	LD	757.9
2	Trp_Fru_FLP_F	LDclkactCtM001_ch3	LD	1016.3
3	Trp_Fru_FLP_F	LDclkactCtM001_ch4	LD	940.9
4	Trp_Fru_FLP_F	LDclkactCtM001_ch5	LD	819.4
5	Trp_Fru_FLP_F	LDclkactCtM001_ch6	LD	785.8
6	Trp_Fru_FLP_F	LDclkactCtM001_ch7	LD	915.6
7	Trp_Fru_FLP_F	LDclkactCtM001_ch8	LD	733
8	Trp_Fru_FLP_F	LDclkactCtM001_ch9	LD	598.2
9	Trp_Fru_FLP_F	LDclkactCtM001_ch10	LD	892.5
10	Trp_Fru_FLP_F	LDclkactCtM001_ch12	LD	668
11	Trp_Fru_FLP_F	LDclkactCtM001_ch14	LD	733.1
12	Trp_Fru_FLP_F	LDclkactCtM001_ch16	LD	1111.8
13	Trp_Fru_FLP_F	LDclkactCtM001_ch18	LD	560.7
14	Trp_Fru_FLP_F	LDclkactCtM001_ch19	LD	1015.1
15	Trp_Fru_FLP_F	LDclkactCtM001_ch20	LD	846.1
16	Trp_Fru_FLP_F	LDclkactCtM001_ch21	LD	794.5
17	Trp_Fru_FLP_F	LDclkactCtM001_ch24	LD	891.5
18	Trp_Fru_FLP_F	LDclkactCtM001_ch27	LD	615.9
19	Trp_Fru_FLP_F	LDclkactCtM001_ch28	LD	978.1
20	Trp_Fru_FLP_F	LDclkactCtM001_ch29	LD	588.8
21	Trp_Fru_FLP_F	LDclkactCtM001_ch30	LD	740.6
22	Trp_Fru_FLP_F	LDclkactCtM001_ch31	LD	1299
23	Trp_Fru_FLP_F	LDclkactCtM001_ch32	LD	1364
24	Trp_Fru_FLP_F	LDclkactCtM003_ch1	LD	665.6
25	Trp_Fru_FLP_F	LDclkactCtM003_ch2	LD	692.8
26	Trp_Fru_FLP_F	LDclkactCtM003_ch3	LD	585.7
27	CLK_TRPA1_F	LDclkactCtM003_ch4	LD	1027.3
28	CLK_TRPA1_F	LDclkactCtM003_ch5	LD	684.4
29	CLK_TRPA1_F	LDclkactCtM003_ch8	LD	960.8
30	CLK_TRPA1_F	LDclkactCtM003_ch9	LD	1290.3
31	CLK_TRPA1_F	LDclkactCtM003_ch10	LD	1194
32	CLK_TRPA1_F	LDclkactCtM003_ch11	LD	588.9
33	CLK_TRPA1_F	LDclkactCtM003_ch12	LD	767.4
34	CLK_TRPA1_F	LDclkactCtM003_ch13	LD	905.4
35	CLK_TRPA1_F	LDclkactCtM003_ch15	LD	854.8
36	CLK_TRPA1_F	LDclkactCtM003_ch16	LD	685.5
37	CLK_TRPA1_F	LDclkactCtM003_ch17	LD	979.5
38	CLK_TRPA1_F	LDclkactCtM003_ch19	LD	705.4
39	CLK_TRPA1_F	LDclkactCtM003_ch20	LD	674.6
40	CLK_TRPA1_F	LDclkactCtM003_ch21	LD	910.1
41	CLK_TRPA1_F	LDclkactCtM003_ch22	LD	1004.2
42	CLK_TRPA1_F	LDclkactCtM003_ch23	LD	719.1
43	CLK_TRPA1_F	LDclkactCtM003_ch24	LD	756.7
44	CLK_TRPA1_F	LDclkactCtM003_ch26	LD	1525.1
45	CLK_TRPA1_F	LDclkactCtM003_ch27	LD	912.6
46	CLK_TRPA1_F	LDclkactCtM003_ch28	LD	1469.4
47	CLK_TRPA1_F	LDclkactCtM003_ch29	LD	664.5
48	CLK_TRPA1_F	LDclkactCtM003_ch31	LD	754.8
49	CLK_TRPA1_F	LDclkactCtM004_ch1	LD	1047.4
50	CLK_TRPA1_F	LDclkactCtM004_ch4	LD	988.9
51	CLK_TRPA1_F	LDclkactCtM004_ch6	LD	552.4
52	CLK_TRPA1_F	LDclkactCtM004_ch7	LD	882.4
53	CS_F	LDclkactCtM004_ch8	LD	638.5
54	CS_F	LDclkactCtM004_ch9	LD	909
55	CS_F	LDclkactCtM004_ch11	LD	825.9
56	CS_F	LDclkactCtM004_ch12	LD	622
57	CS_F	LDclkactCtM004_ch14	LD	418.5
58	CS_F	LDclkactCtM004_ch15	LD	411.5
59	CS_F	LDclkactCtM004_ch16	LD	538.1
60	CS_F	LDclkactCtM004_ch18	LD	953.8
61	CS_F	LDclkactCtM004_ch19	LD	720.6
62	CS_F	LDclkactCtM004_ch21	LD	688.4
63	CS_F	LDclkactCtM004_ch22	LD	730.1
64	CS_F	LDclkactCtM004_ch23	LD	657.4
65	CS_F	LDclkactCtM004_ch24	LD	558.1
66	CS_F	LDclkactCtM004_ch25	LD	645.1
67	CS_F	LDclkactCtM004_ch26	LD	709.3
68	CS_F	LDclkactCtM004_ch27	LD	618.8
69	CS_F	LDclkactCtM004_ch28	LD	1031.2
70	CS_F	LDclkactCtM004_ch29	LD	368
71	CS_F	LDclkactCtM004_ch30	LD	674.8
72	CS_F	LDclkactCtM004_ch31	LD	839.3
73	CS_F	LDclkactCtM004_ch32	LD	810.1
74	CS_F	LDclkactCtM005_ch1	LD	396.6
75	CS_F	LDclkactCtM005_ch2	LD	546.8
76	CS_F	LDclkactCtM005_ch3	LD	1009
77	CS_F	LDclkactCtM005_ch4	LD	866.4
78	CS_F	LDclkactCtM005_ch5	LD	485.5
79	CS_F	LDclkactCtM005_ch6	LD	596.2
80	CS_F	LDclkactCtM005_ch7	LD	681.5
81	CS_F	LDclkactCtM008_ch6	LD	730.9
82	CS_F	LDclkactCtM008_ch7	LD	775.7
83	Trp_Fru_FLP_M	LDclkactCtM005_ch8	LD	750.6
84	Trp_Fru_FLP_M	LDclkactCtM005_ch9	LD	1019.9
85	Trp_Fru_FLP_M	LDclkactCtM005_ch10	LD	960.5
86	Trp_Fru_FLP_M	LDclkactCtM005_ch12	LD	654.2
87	Trp_Fru_FLP_M	LDclkactCtM005_ch13	LD	1014.8
88	Trp_Fru_FLP_M	LDclkactCtM005_ch14	LD	595.8
89	Trp_Fru_FLP_M	LDclkactCtM005_ch15	LD	483.6
90	Trp_Fru_FLP_M	LDclkactCtM005_ch17	LD	1006.5
91	Trp_Fru_FLP_M	LDclkactCtM005_ch18	LD	887.5
92	Trp_Fru_FLP_M	LDclkactCtM005_ch19	LD	803.9
93	Trp_Fru_FLP_M	LDclkactCtM005_ch21	LD	521.2
94	Trp_Fru_FLP_M	LDclkactCtM005_ch22	LD	1128.4
95	Trp_Fru_FLP_M	LDclkactCtM005_ch23	LD	729.4
96	Trp_Fru_FLP_M	LDclkactCtM005_ch24	LD	792.9
97	Trp_Fru_FLP_M	LDclkactCtM005_ch25	LD	711.7
98	Trp_Fru_FLP_M	LDclkactCtM005_ch26	LD	616.6
99	Trp_Fru_FLP_M	LDclkactCtM005_ch27	LD	631.7
100	Trp_Fru_FLP_M	LDclkactCtM005_ch28	LD	1032.2
101	Trp_Fru_FLP_M	LDclkactCtM005_ch29	LD	893
102	Trp_Fru_FLP_M	LDclkactCtM008_ch8	LD	842
103	Trp_Fru_FLP_M	LDclkactCtM008_ch9	LD	1049.2
104	Trp_Fru_FLP_M	LDclkactCtM008_ch10	LD	1309.4
105	Trp_Fru_FLP_M	LDclkactCtM008_ch11	LD	704.8
106	Trp_Fru_FLP_M	LDclkactCtM008_ch12	LD	828.4
107	Trp_Fru_FLP_M	LDclkactCtM008_ch13	LD	1614.6
108	Trp_Fru_FLP_M	LDclkactCtM008_ch14	LD	1829.5
109	Trp_Fru_FLP_M	LDclkactCtM008_ch15	LD	980.6
110	Trp_Fru_FLP_M	LDclkactCtM008_ch16	LD	1589.9
111	Trp_Fru_FLP_M	LDclkactCtM008_ch17	LD	1207.5
112	CLK_TRPA1_M	LDclkactCtM005_ch30	LD	417.7
113	CLK_TRPA1_M	LDclkactCtM005_ch31	LD	615.3
114	CLK_TRPA1_M	LDclkactCtM005_ch32	LD	792.8
115	CLK_TRPA1_M	LDclkactCtM006_ch1	LD	460.9
116	CLK_TRPA1_M	LDclkactCtM006_ch2	LD	1009
117	CLK_TRPA1_M	LDclkactCtM006_ch4	LD	809.2
118	CLK_TRPA1_M	LDclkactCtM006_ch5	LD	698
119	CLK_TRPA1_M	LDclkactCtM006_ch6	LD	617.2
120	CLK_TRPA1_M	LDclkactCtM006_ch7	LD	796.4
121	CLK_TRPA1_M	LDclkactCtM006_ch9	LD	564.8
122	CLK_TRPA1_M	LDclkactCtM006_ch11	LD	761.7
123	CLK_TRPA1_M	LDclkactCtM006_ch12	LD	836.7
124	CLK_TRPA1_M	LDclkactCtM006_ch13	LD	1084.5
125	CLK_TRPA1_M	LDclkactCtM006_ch14	LD	744.5
126	CLK_TRPA1_M	LDclkactCtM006_ch15	LD	801.7
127	CLK_TRPA1_M	LDclkactCtM006_ch17	LD	847.3
128	CLK_TRPA1_M	LDclkactCtM006_ch18	LD	1011.6
129	CLK_TRPA1_M	LDclkactCtM006_ch19	LD	773.8
130	CLK_TRPA1_M	LDclkactCtM006_ch20	LD	761.7
131	CLK_TRPA1_M	LDclkactCtM006_ch21	LD	725.4
132	CLK_TRPA1_M	LDclkactCtM006_ch22	LD	783
133	CLK_TRPA1_M	LDclkactCtM006_ch23	LD	442.9
134	CLK_TRPA1_M	LDclkactCtM006_ch24	LD	592.2
135	CLK_TRPA1_M	LDclkactCtM006_ch25	LD	874.3
136	CLK_TRPA1_M	LDclkactCtM006_ch26	LD	546.1
137	CLK_TRPA1_M	LDclkactCtM006_ch27	LD	841.1
138	CLK_TRPA1_M	LDclkactCtM006_ch28	LD	480.4
139	CLK_TRPA1_M	LDclkactCtM006_ch29	LD	883.7
140	CS_M	LDclkactCtM006_ch31	LD	739.4
141	CS_M	LDclkactCtM006_ch32	LD	748.9
142	CS_M	LDclkactCtM007_ch2	LD	809
143	CS_M	LDclkactCtM007_ch3	LD	819.9
144	CS_M	LDclkactCtM007_ch4	LD	527.9
145	CS_M	LDclkactCtM007_ch5	LD	870.3
146	CS_M	LDclkactCtM007_ch6	LD	1096
147	CS_M	LDclkactCtM007_ch7	LD	1114.5
148	CS_M	LDclkactCtM007_ch8	LD	887.9
149	CS_M	LDclkactCtM007_ch9	LD	1348.6
150	CS_M	LDclkactCtM007_ch10	LD	396
151	CS_M	LDclkactCtM007_ch11	LD	786.8
152	CS_M	LDclkactCtM007_ch12	LD	400.7
153	CS_M	LDclkactCtM007_ch13	LD	1045.5
154	CS_M	LDclkactCtM007_ch14	LD	743.3
155	CS_M	LDclkactCtM007_ch15	LD	1394.2
156	CS_M	LDclkactCtM007_ch16	LD	634.8
157	CS_M	LDclkactCtM007_ch17	LD	952.1
158	CS_M	LDclkactCtM007_ch18	LD	769.4
159	CS_M	LDclkactCtM007_ch20	LD	734.8
160	CS_M	LDclkactCtM007_ch21	LD	961.3
161	CS_M	LDclkactCtM007_ch22	LD	1453.5
162	CS_M	LDclkactCtM007_ch23	LD	837.1
163	CS_M	LDclkactCtM007_ch24	LD	910.5
164	CS_M	LDclkactCtM007_ch25	LD	968.1
165	CS_M	LDclkactCtM007_ch26	LD	698.7
166	CS_M	LDclkactCtM008_ch2	LD	1542.1
167	CS_M	LDclkactCtM008_ch3	LD	878.4
168	CS_M	LDclkactCtM008_ch5	LD	894.1

## Sheet: 6.Mean_and_median_actogram
	Dec_time	Condition	date	Dec_ZT_time	median	mean	sem
1	0	Trp_Fru_FLP_F	2022-01-29	960	0	0.0769231	0.0769231
2	1	Trp_Fru_FLP_F	2022-01-29	961	0	0.153846	0.153846
3	2	Trp_Fru_FLP_F	2022-01-29	962	0	1.42308	1.01401
4	3	Trp_Fru_FLP_F	2022-01-29	963	0	1.03846	0.821782
5	4	Trp_Fru_FLP_F	2022-01-29	964	0	0.846154	0.846154
6	5	Trp_Fru_FLP_F	2022-01-29	965	0	0.576923	0.278309
7	6	Trp_Fru_FLP_F	2022-01-29	966	0	1.03846	0.922339
8	7	Trp_Fru_FLP_F	2022-01-29	967	0	0.307692	0.240315
9	8	Trp_Fru_FLP_F	2022-01-29	968	0	0.307692	0.307692
10	9	Trp_Fru_FLP_F	2022-01-29	969	0	0.461538	0.294727
11	10	Trp_Fru_FLP_F	2022-01-29	970	0	0.192308	0.157081
12	11	Trp_Fru_FLP_F	2022-01-29	971	0	0.153846	0.106588
13	12	Trp_Fru_FLP_F	2022-01-29	972	0	0.384615	0.272182
14	13	Trp_Fru_FLP_F	2022-01-29	973	0	0.153846	0.120158
15	14	Trp_Fru_FLP_F	2022-01-29	974	0	0.0384615	0.0384615
16	15	Trp_Fru_FLP_F	2022-01-29	975	0	0.384615	0.384615
17	16	Trp_Fru_FLP_F	2022-01-29	976	0	0.538462	0.373057
18	17	Trp_Fru_FLP_F	2022-01-29	977	0	0.269231	0.130769
19	18	Trp_Fru_FLP_F	2022-01-29	978	0	0.115385	0.0846154
20	19	Trp_Fru_FLP_F	2022-01-29	979	0	0.307692	0.173376
21	20	Trp_Fru_FLP_F	2022-01-29	980	0	0.192308	0.111206
22	21	Trp_Fru_FLP_F	2022-01-29	981	0	0.192308	0.136091
23	22	Trp_Fru_FLP_F	2022-01-29	982	0	0.0384615	0.0384615
24	23	Trp_Fru_FLP_F	2022-01-29	983	0	0.0384615	0.0384615
25	24	Trp_Fru_FLP_F	2022-01-29	984	0	0.0769231	0.0769231
26	25	Trp_Fru_FLP_F	2022-01-29	985	0	0.0384615	0.0384615
27	26	Trp_Fru_FLP_F	2022-01-29	986	0	0.346154	0.199556
28	27	Trp_Fru_FLP_F	2022-01-29	987	0	0.307692	0.240315
29	28	Trp_Fru_FLP_F	2022-01-29	988	0	0.230769	0.169231
30	29	Trp_Fru_FLP_F	2022-01-29	989	0	0.346154	0.214421
31	30	Trp_Fru_FLP_F	2022-01-29	990	0	0.384615	0.346752
32	31	Trp_Fru_FLP_F	2022-01-29	991	0	0.384615	0.215385
33	32	Trp_Fru_FLP_F	2022-01-29	992	0	1	0.768615
34	33	Trp_Fru_FLP_F	2022-01-29	993	0	0.653846	0.384077
35	34	Trp_Fru_FLP_F	2022-01-29	994	0	0.807692	0.617736
36	35	Trp_Fru_FLP_F	2022-01-29	995	0	0.0769231	0.0532939
37	36	Trp_Fru_FLP_F	2022-01-29	996	0	2.38462	1.68895
38	37	Trp_Fru_FLP_F	2022-01-29	997	0	1.19231	0.776618
39	38	Trp_Fru_FLP_F	2022-01-29	998	0	0.153846	0.153846
40	39	Trp_Fru_FLP_F	2022-01-29	999	0	0.730769	0.442224
41	40	Trp_Fru_FLP_F	2022-01-29	1000	0	0.307692	0.173376
42	41	Trp_Fru_FLP_F	2022-01-29	1001	0	0.5	0.319856
43	42	Trp_Fru_FLP_F	2022-01-29	1002	0	0.307692	0.182033
44	43	Trp_Fru_FLP_F	2022-01-29	1003	0	0.230769	0.115128
45	44	Trp_Fru_FLP_F	2022-01-29	1004	0	0.346154	0.199556
46	45	Trp_Fru_FLP_F	2022-01-29	1005	0	0.192308	0.136091
47	46	Trp_Fru_FLP_F	2022-01-29	1006	0	0.153846	0.106588
48	47	Trp_Fru_FLP_F	2022-01-29	1007	0	0.692308	0.387375
49	48	Trp_Fru_FLP_F	2022-01-29	1008	0	0.153846	0.153846
50	49	Trp_Fru_FLP_F	2022-01-29	1009	0	0.538462	0.423287
51	50	Trp_Fru_FLP_F	2022-01-29	1010	0	0.230769	0.159882
52	51	Trp_Fru_FLP_F	2022-01-29	1011	0	0.0769231	0.0532939
53	52	Trp_Fru_FLP_F	2022-01-29	1012	0	0.692308	0.387375
54	53	Trp_Fru_FLP_F	2022-01-29	1013	0	0.0769231	0.0532939
55	54	Trp_Fru_FLP_F	2022-01-29	1014	0	0.153846	0.153846
56	55	Trp_Fru_FLP_F	2022-01-29	1015	0	0.846154	0.767999
57	56	Trp_Fru_FLP_F	2022-01-29	1016	0	0.269231	0.196568
58	57	Trp_Fru_FLP_F	2022-01-29	1017	0	0.538462	0.461538
59	58	Trp_Fru_FLP_F	2022-01-29	1018	0	0.307692	0.182033
60	59	Trp_Fru_FLP_F	2022-01-29	1019	0	0.192308	0.157081
61	60	Trp_Fru_FLP_F	2022-01-29	1020	0	0.346154	0.253846
62	61	Trp_Fru_FLP_F	2022-01-29	1021	0	0	0
63	62	Trp_Fru_FLP_F	2022-01-29	1022	0	0.153846	0.153846
64	63	Trp_Fru_FLP_F	2022-01-29	1023	0	0.115385	0.0846154
65	64	Trp_Fru_FLP_F	2022-01-29	1024	0	0.384615	0.384615
66	65	Trp_Fru_FLP_F	2022-01-29	1025	0	0.730769	0.564481
67	66	Trp_Fru_FLP_F	2022-01-29	1026	0	0	0
68	67	Trp_Fru_FLP_F	2022-01-29	1027	0	0	0
69	68	Trp_Fru_FLP_F	2022-01-29	1028	0	0.461538	0.294727
70	69	Trp_Fru_FLP_F	2022-01-29	1029	0	0.346154	0.346154
71	70	Trp_Fru_FLP_F	2022-01-29	1030	0	0.5	0.273158
72	71	Trp_Fru_FLP_F	2022-01-29	1031	0	0.961538	0.593505
73	72	Trp_Fru_FLP_F	2022-01-29	1032	0	1	0.433235
74	73	Trp_Fru_FLP_F	2022-01-29	1033	0	0.730769	0.330769
75	74	Trp_Fru_FLP_F	2022-01-29	1034	0	0.423077	0.255241
76	75	Trp_Fru_FLP_F	2022-01-29	1035	0	0.0769231	0.0532939
77	76	Trp_Fru_FLP_F	2022-01-29	1036	0	0.115385	0.0846154
78	77	Trp_Fru_FLP_F	2022-01-29	1037	0	0.153846	0.153846
79	78	Trp_Fru_FLP_F	2022-01-29	1038	0	0.115385	0.115385
80	79	Trp_Fru_FLP_F	2022-01-29	1039	0	0	0
81	80	Trp_Fru_FLP_F	2022-01-29	1040	0	0.0384615	0.0384615
82	81	Trp_Fru_FLP_F	2022-01-29	1041	0	0.153846	0.153846
83	82	Trp_Fru_FLP_F	2022-01-29	1042	0	0.115385	0.0846154
84	83	Trp_Fru_FLP_F	2022-01-29	1043	0	0.346154	0.18349
85	84	Trp_Fru_FLP_F	2022-01-29	1044	0	0.153846	0.120158
86	85	Trp_Fru_FLP_F	2022-01-29	1045	0	0.0384615	0.0384615
87	86	Trp_Fru_FLP_F	2022-01-29	1046	0	0.384615	0.242277
88	87	Trp_Fru_FLP_F	2022-01-29	1047	0	0.346154	0.27703
89	88	Trp_Fru_FLP_F	2022-01-29	1048	0	0.0769231	0.0532939
90	89	Trp_Fru_FLP_F	2022-01-29	1049	0	0.230769	0.115128
91	90	Trp_Fru_FLP_F	2022-01-29	1050	0	0.115385	0.0846154
92	91	Trp_Fru_FLP_F	2022-01-29	1051	0	0.0384615	0.0384615
93	92	Trp_Fru_FLP_F	2022-01-29	1052	0	0.538462	0.329245
94	93	Trp_Fru_FLP_F	2022-01-29	1053	0	0.461538	0.249497
95	94	Trp_Fru_FLP_F	2022-01-29	1054	0	0.576923	0.392911
96	95	Trp_Fru_FLP_F	2022-01-29	1055	0	1.19231	0.880593
97	96	Trp_Fru_FLP_F	2022-01-29	1056	0	0.5	0.289562
98	97	Trp_Fru_FLP_F	2022-01-29	1057	0	0.0384615	0.0384615
99	98	Trp_Fru_FLP_F	2022-01-29	1058	0	0.269231	0.162269
100	99	Trp_Fru_FLP_F	2022-01-29	1059	0	0.576923	0.372819
101	100	Trp_Fru_FLP_F	2022-01-29	1060	0	0.5	0.261652
102	101	Trp_Fru_FLP_F	2022-01-29	1061	0	0.192308	0.111206
103	102	Trp_Fru_FLP_F	2022-01-29	1062	0	0.423077	0.261199
104	103	Trp_Fru_FLP_F	2022-01-29	1063	0	0.538462	0.236843
105	104	Trp_Fru_FLP_F	2022-01-29	1064	0	0.692308	0.395238
106	105	Trp_Fru_FLP_F	2022-01-29	1065	0	0.846154	0.286584
107	106	Trp_Fru_FLP_F	2022-01-29	1066	0	0.346154	0.308556
108	107	Trp_Fru_FLP_F	2022-01-29	1067	0	0.346154	0.18349
109	108	Trp_Fru_FLP_F	2022-01-29	1068	0	0.461538	0.230256
110	109	Trp_Fru_FLP_F	2022-01-29	1069	0	0.884615	0.385614
111	110	Trp_Fru_FLP_F	2022-01-29	1070	0	1.5	1.00192
112	111	Trp_Fru_FLP_F	2022-01-29	1071	0	0.576923	0.267024
113	112	Trp_Fru_FLP_F	2022-01-29	1072	0	0.384615	0.215385
114	113	Trp_Fru_FLP_F	2022-01-29	1073	0	0.346154	0.146154
115	114	Trp_Fru_FLP_F	2022-01-29	1074	0	0.692308	0.575845
116	115	Trp_Fru_FLP_F	2022-01-29	1075	0	0.615385	0.299111
117	116	Trp_Fru_FLP_F	2022-01-29	1076	0	0.923077	0.429393
118	117	Trp_Fru_FLP_F	2022-01-29	1077	0	0.269231	0.142048
119	118	Trp_Fru_FLP_F	2022-01-29	1078	0	0.384615	0.184615
120	119	Trp_Fru_FLP_F	2022-01-29	1079	0	0.384615	0.16712
121	120	Trp_Fru_FLP_F	2022-01-29	1080	0	0.538462	0.461538
122	121	Trp_Fru_FLP_F	2022-01-29	1081	0	0.576923	0.338199
123	122	Trp_Fru_FLP_F	2022-01-29	1082	0	0.884615	0.427252
124	123	Trp_Fru_FLP_F	2022-01-29	1083	0	0.423077	0.21607
125	124	Trp_Fru_FLP_F	2022-01-29	1084	0	0.269231	0.162269
126	125	Trp_Fru_FLP_F	2022-01-29	1085	0	0.230769	0.194602
127	126	Trp_Fru_FLP_F	2022-01-29	1086	0	0.576923	0.338199
128	127	Trp_Fru_FLP_F	2022-01-29	1087	0	0.5	0.310087
129	128	Trp_Fru_FLP_F	2022-01-29	1088	0	0.846154	0.692137
130	129	Trp_Fru_FLP_F	2022-01-29	1089	0	0.423077	0.261199
131	130	Trp_Fru_FLP_F	2022-01-29	1090	0	0.192308	0.157081
132	131	Trp_Fru_FLP_F	2022-01-29	1091	0	0.0384615	0.0384615
133	132	Trp_Fru_FLP_F	2022-01-29	1092	0	0.230769	0.139314
134	133	Trp_Fru_FLP_F	2022-01-29	1093	0	0.0769231	0.0532939
135	134	Trp_Fru_FLP_F	2022-01-29	1094	0	0.846154	0.731053
136	135	Trp_Fru_FLP_F	2022-01-29	1095	0	0.115385	0.0638971
137	136	Trp_Fru_FLP_F	2022-01-29	1096	0	0.0384615	0.0384615
138	137	Trp_Fru_FLP_F	2022-01-29	1097	0	0.230769	0.194602
139	138	Trp_Fru_FLP_F	2022-01-29	1098	0	0.153846	0.106588
140	139	Trp_Fru_FLP_F	2022-01-29	1099	0	0.0769231	0.0532939
141	140	Trp_Fru_FLP_F	2022-01-29	1100	0	0.346154	0.207122
142	141	Trp_Fru_FLP_F	2022-01-29	1101	0	0.692308	0.292308
143	142	Trp_Fru_FLP_F	2022-01-29	1102	0	0.192308	0.136091
144	143	Trp_Fru_FLP_F	2022-01-29	1103	0	0.461538	0.423287
145	144	Trp_Fru_FLP_F	2022-01-29	1104	0	0.230769	0.139314
146	145	Trp_Fru_FLP_F	2022-01-29	1105	0	0.115385	0.115385
147	146	Trp_Fru_FLP_F	2022-01-29	1106	0	0.153846	0.120158
148	147	Trp_Fru_FLP_F	2022-01-29	1107	0	0.0384615	0.0384615
149	148	Trp_Fru_FLP_F	2022-01-29	1108	0	0.192308	0.192308
150	149	Trp_Fru_FLP_F	2022-01-29	1109	0	0.115385	0.115385
151	150	Trp_Fru_FLP_F	2022-01-29	1110	0	0.0769231	0.0769231
152	151	Trp_Fru_FLP_F	2022-01-29	1111	0	0.0769231	0.0532939
153	152	Trp_Fru_FLP_F	2022-01-29	1112	0	0.0769231	0.0769231
154	153	Trp_Fru_FLP_F	2022-01-29	1113	0	1.23077	1.15333
155	154	Trp_Fru_FLP_F	2022-01-29	1114	0	0.0384615	0.0384615
156	155	Trp_Fru_FLP_F	2022-01-29	1115	0	0.153846	0.120158
157	156	Trp_Fru_FLP_F	2022-01-29	1116	0	0.153846	0.153846
158	157	Trp_Fru_FLP_F	2022-01-29	1117	0	0.0384615	0.0384615
159	158	Trp_Fru_FLP_F	2022-01-29	1118	0	0	0
160	159	Trp_Fru_FLP_F	2022-01-29	1119	0	0.0769231	0.0532939
161	160	Trp_Fru_FLP_F	2022-01-29	1120	0	0.153846	0.106588
162	161	Trp_Fru_FLP_F	2022-01-29	1121	0	0.115385	0.0638971
163	162	Trp_Fru_FLP_F	2022-01-29	1122	0	0.846154	0.424961
164	163	Trp_Fru_FLP_F	2022-01-29	1123	0	0.615385	0.342286
165	164	Trp_Fru_FLP_F	2022-01-29	1124	0	0.0769231	0.0532939
166	165	Trp_Fru_FLP_F	2022-01-29	1125	0	0.961538	0.547669
167	166	Trp_Fru_FLP_F	2022-01-29	1126	0	0.269231	0.152494
168	167	Trp_Fru_FLP_F	2022-01-29	1127	0	0.346154	0.27142
169	168	Trp_Fru_FLP_F	2022-01-29	1128	0	0.538462	0.393136
170	169	Trp_Fru_FLP_F	2022-01-29	1129	0	0.0384615	0.0384615
171	170	Trp_Fru_FLP_F	2022-01-29	1130	0	0	0
172	171	Trp_Fru_FLP_F	2022-01-29	1131	0	0.0769231	0.0769231
173	172	Trp_Fru_FLP_F	2022-01-29	1132	0	0.0769231	0.0769231
174	173	Trp_Fru_FLP_F	2022-01-29	1133	0	0.269231	0.269231
175	174	Trp_Fru_FLP_F	2022-01-29	1134	0	0.192308	0.136091
176	175	Trp_Fru_FLP_F	2022-01-29	1135	0	0.0769231	0.0769231
177	176	Trp_Fru_FLP_F	2022-01-29	1136	0	0.0769231	0.0769231
178	177	Trp_Fru_FLP_F	2022-01-29	1137	0	0.153846	0.0910166
179	178	Trp_Fru_FLP_F	2022-01-29	1138	0	0.269231	0.162269
180	179	Trp_Fru_FLP_F	2022-01-29	1139	0	0.307692	0.270437
181	180	Trp_Fru_FLP_F	2022-01-29	1140	0	0.5	0.32463
182	181	Trp_Fru_FLP_F	2022-01-29	1141	0	0.0769231	0.0532939
183	182	Trp_Fru_FLP_F	2022-01-29	1142	0	0.576923	0.400665
184	183	Trp_Fru_FLP_F	2022-01-29	1143	0	0.423077	0.385
185	184	Trp_Fru_FLP_F	2022-01-29	1144	0	0.0384615	0.0384615
186	185	Trp_Fru_FLP_F	2022-01-29	1145	0	0.269231	0.188579
187	186	Trp_Fru_FLP_F	2022-01-29	1146	0	0.115385	0.0846154
188	187	Trp_Fru_FLP_F	2022-01-29	1147	0	0.192308	0.124273
189	188	Trp_Fru_FLP_F	2022-01-29	1148	0	0.346154	0.214421
190	189	Trp_Fru_FLP_F	2022-01-29	1149	0	0.0769231	0.0769231
191	190	Trp_Fru_FLP_F	2022-01-29	1150	0	0.192308	0.124273
192	191	Trp_Fru_FLP_F	2022-01-29	1151	0	0.0384615	0.0384615
193	192	Trp_Fru_FLP_F	2022-01-29	1152	0	0	0
194	193	Trp_Fru_FLP_F	2022-01-29	1153	0	0.192308	0.124273
195	194	Trp_Fru_FLP_F	2022-01-29	1154	0	0.0769231	0.0769231
196	195	Trp_Fru_FLP_F	2022-01-29	1155	0	0.153846	0.153846
197	196	Trp_Fru_FLP_F	2022-01-29	1156	0	0.0769231	0.0769231
198	197	Trp_Fru_FLP_F	2022-01-29	1157	0	0.153846	0.120158
199	198	Trp_Fru_FLP_F	2022-01-29	1158	0	0.192308	0.136091
200	199	Trp_Fru_FLP_F	2022-01-29	1159	0	0.115385	0.0638971
201	200	Trp_Fru_FLP_F	2022-01-29	1160	0	0.192308	0.124273
202	201	Trp_Fru_FLP_F	2022-01-29	1161	0	0.423077	0.423077
203	202	Trp_Fru_FLP_F	2022-01-29	1162	0	0.192308	0.0963843
204	203	Trp_Fru_FLP_F	2022-01-29	1163	0	0.0769231	0.0769231
205	204	Trp_Fru_FLP_F	2022-01-29	1164	0	0.384615	0.384615
206	205	Trp_Fru_FLP_F	2022-01-29	1165	0	0.0384615	0.0384615
207	206	Trp_Fru_FLP_F	2022-01-29	1166	0	0.0384615	0.0384615
208	207	Trp_Fru_FLP_F	2022-01-29	1167	0	0.0384615	0.0384615
209	208	Trp_Fru_FLP_F	2022-01-29	1168	0	0.0384615	0.0384615
210	209	Trp_Fru_FLP_F	2022-01-29	1169	0	0.0384615	0.0384615
211	210	Trp_Fru_FLP_F	2022-01-29	1170	0	0	0
212	211	Trp_Fru_FLP_F	2022-01-29	1171	0	0.307692	0.307692
213	212	Trp_Fru_FLP_F	2022-01-29	1172	0	0.307692	0.213175
214	213	Trp_Fru_FLP_F	2022-01-29	1173	0	0.115385	0.115385
215	214	Trp_Fru_FLP_F	2022-01-29	1174	0	0.230769	0.159882
216	215	Trp_Fru_FLP_F	2022-01-29	1175	0	1.23077	0.879349
217	216	Trp_Fru_FLP_F	2022-01-29	1176	0	0.115385	0.0638971
218	217	Trp_Fru_FLP_F	2022-01-29	1177	0	0.153846	0.106588
219	218	Trp_Fru_FLP_F	2022-01-29	1178	0	0.0769231	0.0532939
220	219	Trp_Fru_FLP_F	2022-01-29	1179	0	0.346154	0.22148
221	220	Trp_Fru_FLP_F	2022-01-29	1180	0	0.423077	0.201327
222	221	Trp_Fru_FLP_F	2022-01-29	1181	0	0.5	0.294827
223	222	Trp_Fru_FLP_F	2022-01-29	1182	0	2.69231	1.95784
224	223	Trp_Fru_FLP_F	2022-01-29	1183	0	1.42308	0.762936
225	224	Trp_Fru_FLP_F	2022-01-29	1184	0	0.615385	0.342286
226	225	Trp_Fru_FLP_F	2022-01-29	1185	0	0.5	0.249615
227	226	Trp_Fru_FLP_F	2022-01-29	1186	0	0.269231	0.162269
228	227	Trp_Fru_FLP_F	2022-01-29	1187	0	0.384615	0.346752
229	228	Trp_Fru_FLP_F	2022-01-29	1188	0	1.46154	0.946623
230	229	Trp_Fru_FLP_F	2022-01-29	1189	0	0.423077	0.22987
231	230	Trp_Fru_FLP_F	2022-01-29	1190	0	0.5	0.32463
232	231	Trp_Fru_FLP_F	2022-01-29	1191	0	0.192308	0.136091
233	232	Trp_Fru_FLP_F	2022-01-29	1192	0	0.5	0.294827
234	233	Trp_Fru_FLP_F	2022-01-29	1193	0	1	0.473936
235	234	Trp_Fru_FLP_F	2022-01-29	1194	0	0.346154	0.207122
236	235	Trp_Fru_FLP_F	2022-01-29	1195	0	0.307692	0.190297
237	236	Trp_Fru_FLP_F	2022-01-29	1196	0	0.461538	0.261538
238	237	Trp_Fru_FLP_F	2022-01-29	1197	0	0.346154	0.156326
239	238	Trp_Fru_FLP_F	2022-01-29	1198	0	0.115385	0.0846154
240	239	Trp_Fru_FLP_F	2022-01-29	1199	0	0.307692	0.173376
241	240	Trp_Fru_FLP_F	2022-01-29	1200	0	1	0.807656
242	241	Trp_Fru_FLP_F	2022-01-29	1201	0	0.692308	0.46333
243	242	Trp_Fru_FLP_F	2022-01-29	1202	0	0.5	0.201914
244	243	Trp_Fru_FLP_F	2022-01-29	1203	0	0.846154	0.591458
245	244	Trp_Fru_FLP_F	2022-01-29	1204	0	0.692308	0.399111
246	245	Trp_Fru_FLP_F	2022-01-29	1205	0	0.576923	0.223077
247	246	Trp_Fru_FLP_F	2022-01-29	1206	0	0.538462	0.309991
248	247	Trp_Fru_FLP_F	2022-01-29	1207	0	0.461538	0.209253
249	248	Trp_Fru_FLP_F	2022-01-29	1208	0	0.923077	0.4365
250	249	Trp_Fru_FLP_F	2022-01-29	1209	0	0.153846	0.120158
251	250	Trp_Fru_FLP_F	2022-01-29	1210	0	0.538462	0.304988
252	251	Trp_Fru_FLP_F	2022-01-29	1211	0	0.423077	0.314633
253	252	Trp_Fru_FLP_F	2022-01-29	1212	0	0.192308	0.136091
254	253	Trp_Fru_FLP_F	2022-01-29	1213	0	0.423077	0.208829
255	254	Trp_Fru_FLP_F	2022-01-29	1214	0	0.576923	0.261199
256	255	Trp_Fru_FLP_F	2022-01-29	1215	0	0.846154	0.413958
257	256	Trp_Fru_FLP_F	2022-01-29	1216	0	0.230769	0.139314
258	257	Trp_Fru_FLP_F	2022-01-29	1217	0	0.307692	0.182033
259	258	Trp_Fru_FLP_F	2022-01-29	1218	0	0.615385	0.426351
260	259	Trp_Fru_FLP_F	2022-01-29	1219	0	0.192308	0.157081
261	260	Trp_Fru_FLP_F	2022-01-29	1220	0	0.384615	0.184615
262	261	Trp_Fru_FLP_F	2022-01-29	1221	0	0.346154	0.253846
263	262	Trp_Fru_FLP_F	2022-01-29	1222	0	0.538462	0.499941
264	263	Trp_Fru_FLP_F	2022-01-29	1223	0	0.692308	0.439473
265	264	Trp_Fru_FLP_F	2022-01-29	1224	0	0.346154	0.308556
266	265	Trp_Fru_FLP_F	2022-01-29	1225	0	0.0384615	0.0384615
267	266	Trp_Fru_FLP_F	2022-01-29	1226	0	0	0
268	267	Trp_Fru_FLP_F	2022-01-29	1227	0	1.03846	0.925669
269	268	Trp_Fru_FLP_F	2022-01-29	1228	0	0.269231	0.162269
270	269	Trp_Fru_FLP_F	2022-01-29	1229	0	0.0384615	0.0384615
271	270	Trp_Fru_FLP_F	2022-01-29	1230	0	0.153846	0.106588
272	271	Trp_Fru_FLP_F	2022-01-29	1231	0	0.153846	0.153846
273	272	Trp_Fru_FLP_F	2022-01-29	1232	0	0.346154	0.22148
274	273	Trp_Fru_FLP_F	2022-01-29	1233	0	2.07692	1.2913
275	274	Trp_Fru_FLP_F	2022-01-29	1234	0	0.461538	0.278627
276	275	Trp_Fru_FLP_F	2022-01-29	1235	0	2.73077	2.0453
277	276	Trp_Fru_FLP_F	2022-01-29	1236	0	1.03846	0.401845
278	277	Trp_Fru_FLP_F	2022-01-29	1237	0	0.576923	0.388975
279	278	Trp_Fru_FLP_F	2022-01-29	1238	0	0.5	0.216617
280	279	Trp_Fru_FLP_F	2022-01-29	1239	0	0.730769	0.31161
281	280	Trp_Fru_FLP_F	2022-01-29	1240	0	0.615385	0.272182
282	281	Trp_Fru_FLP_F	2022-01-29	1241	0	0.653846	0.282529
283	282	Trp_Fru_FLP_F	2022-01-29	1242	0	0.769231	0.295128
284	283	Trp_Fru_FLP_F	2022-01-29	1243	0	1.11538	0.785105
285	284	Trp_Fru_FLP_F	2022-01-29	1244	0	0.884615	0.461859
286	285	Trp_Fru_FLP_F	2022-01-29	1245	0	1.03846	0.518818
287	286	Trp_Fru_FLP_F	2022-01-29	1246	0	0.423077	0.261199
288	287	Trp_Fru_FLP_F	2022-01-29	1247	0	0.346154	0.174905
289	288	Trp_Fru_FLP_F	2022-01-29	1248	0	0.576923	0.283783
290	289	Trp_Fru_FLP_F	2022-01-29	1249	0	0.576923	0.242887
291	290	Trp_Fru_FLP_F	2022-01-29	1250	0	0.730769	0.507051
292	291	Trp_Fru_FLP_F	2022-01-29	1251	0	0.115385	0.0638971
293	292	Trp_Fru_FLP_F	2022-01-29	1252	0	0.730769	0.296428
294	293	Trp_Fru_FLP_F	2022-01-29	1253	0	0.423077	0.168003
295	294	Trp_Fru_FLP_F	2022-01-29	1254	0	0.461538	0.230256
296	295	Trp_Fru_FLP_F	2022-01-29	1255	0	0.384615	0.254661
297	296	Trp_Fru_FLP_F	2022-01-29	1256	0	0.461538	0.209253
298	297	Trp_Fru_FLP_F	2022-01-29	1257	0	0.923077	0.403535
299	298	Trp_Fru_FLP_F	2022-01-29	1258	0	0.653846	0.265691
300	299	Trp_Fru_FLP_F	2022-01-29	1259	0	0.230769	0.127794
301	300	Trp_Fru_FLP_F	2022-01-29	1260	0	0.346154	0.253846
302	301	Trp_Fru_FLP_F	2022-01-29	1261	0	0.653846	0.327894
303	302	Trp_Fru_FLP_F	2022-01-29	1262	0	1.26923	1.01004
304	303	Trp_Fru_FLP_F	2022-01-29	1263	0	0.153846	0.120158
305	304	Trp_Fru_FLP_F	2022-01-29	1264	0	0.115385	0.0846154
306	305	Trp_Fru_FLP_F	2022-01-29	1265	0	0.153846	0.153846
307	306	Trp_Fru_FLP_F	2022-01-29	1266	0	0.0384615	0.0384615
308	307	Trp_Fru_FLP_F	2022-01-29	1267	0	0.0769231	0.0769231
309	308	Trp_Fru_FLP_F	2022-01-29	1268	0	0.192308	0.192308
310	309	Trp_Fru_FLP_F	2022-01-29	1269	0	0.153846	0.153846
311	310	Trp_Fru_FLP_F	2022-01-29	1270	0	0.0384615	0.0384615
312	311	Trp_Fru_FLP_F	2022-01-29	1271	0	0.230769	0.127794
313	312	Trp_Fru_FLP_F	2022-01-29	1272	0	0.269231	0.142048
314	313	Trp_Fru_FLP_F	2022-01-29	1273	0	0.423077	0.283783
315	314	Trp_Fru_FLP_F	2022-01-29	1274	0	2.11538	1.95828
316	315	Trp_Fru_FLP_F	2022-01-29	1275	0	0.538462	0.373057
317	316	Trp_Fru_FLP_F	2022-01-29	1276	0	0.615385	0.400296
318	317	Trp_Fru_FLP_F	2022-01-29	1277	0	0.769231	0.404998
319	318	Trp_Fru_FLP_F	2022-01-29	1278	0	0.923077	0.379972
320	319	Trp_Fru_FLP_F	2022-01-29	1279	0	0.423077	0.208829
321	320	Trp_Fru_FLP_F	2022-01-29	1280	0	0.115385	0.0846154
322	321	Trp_Fru_FLP_F	2022-01-29	1281	0	0.269231	0.118422
323	322	Trp_Fru_FLP_F	2022-01-29	1282	0	1.07692	0.592058
324	323	Trp_Fru_FLP_F	2022-01-29	1283	0	0.615385	0.333176
325	324	Trp_Fru_FLP_F	2022-01-29	1284	0	0.230769	0.139314
326	325	Trp_Fru_FLP_F	2022-01-29	1285	0	0.115385	0.0638971
327	326	Trp_Fru_FLP_F	2022-01-29	1286	0	0.153846	0.0910166
328	327	Trp_Fru_FLP_F	2022-01-29	1287	0	0.730769	0.330769
329	328	Trp_Fru_FLP_F	2022-01-29	1288	0	0.0769231	0.0532939
330	329	Trp_Fru_FLP_F	2022-01-29	1289	0	0.538462	0.351834
331	330	Trp_Fru_FLP_F	2022-01-29	1290	0	0.269231	0.162269
332	331	Trp_Fru_FLP_F	2022-01-29	1291	0	0.538462	0.28946
333	332	Trp_Fru_FLP_F	2022-01-29	1292	0	1.34615	0.913055
334	333	Trp_Fru_FLP_F	2022-01-29	1293	0	0.615385	0.396434
335	334	Trp_Fru_FLP_F	2022-01-29	1294	0	0.192308	0.124273
336	335	Trp_Fru_FLP_F	2022-01-29	1295	0	0.807692	0.318744
337	336	Trp_Fru_FLP_F	2022-01-29	1296	0	1.30769	0.774138
338	337	Trp_Fru_FLP_F	2022-01-29	1297	0	0.692308	0.292308
339	338	Trp_Fru_FLP_F	2022-01-29	1298	0	0.692308	0.410513
340	339	Trp_Fru_FLP_F	2022-01-29	1299	0	0.230769	0.139314
341	340	Trp_Fru_FLP_F	2022-01-29	1300	0	0.461538	0.216481
342	341	Trp_Fru_FLP_F	2022-01-29	1301	0	0.653846	0.429462
343	342	Trp_Fru_FLP_F	2022-01-29	1302	0	0.230769	0.159882
344	343	Trp_Fru_FLP_F	2022-01-29	1303	0	0.5	0.230384
345	344	Trp_Fru_FLP_F	2022-01-29	1304	0	1.30769	0.733315
346	345	Trp_Fru_FLP_F	2022-01-29	1305	0	0.384615	0.242277
347	346	Trp_Fru_FLP_F	2022-01-29	1306	0	0.230769	0.127794
348	347	Trp_Fru_FLP_F	2022-01-29	1307	0	1.76923	0.900099
349	348	Trp_Fru_FLP_F	2022-01-29	1308	0	0.846154	0.463074
350	349	Trp_Fru_FLP_F	2022-01-29	1309	0	0.576923	0.309705
351	350	Trp_Fru_FLP_F	2022-01-29	1310	0	0.576923	0.255241
352	351	Trp_Fru_FLP_F	2022-01-29	1311	0	0.653846	0.265691
353	352	Trp_Fru_FLP_F	2022-01-29	1312	0	0.653846	0.37598
354	353	Trp_Fru_FLP_F	2022-01-29	1313	0	0.307692	0.220274
355	354	Trp_Fru_FLP_F	2022-01-29	1314	0	0.576923	0.208829
356	355	Trp_Fru_FLP_F	2022-01-29	1315	0	0.807692	0.288333
357	356	Trp_Fru_FLP_F	2022-01-29	1316	0	0.615385	0.254661
358	357	Trp_Fru_FLP_F	2022-01-29	1317	0	0.653846	0.467209
359	358	Trp_Fru_FLP_F	2022-01-29	1318	0	0.269231	0.118422
360	359	Trp_Fru_FLP_F	2022-01-29	1319	0	0.346154	0.135218
361	360	Trp_Fru_FLP_F	2022-01-29	1320	0	0.5	0.315009
362	361	Trp_Fru_FLP_F	2022-01-29	1321	0	0.307692	0.173376
363	362	Trp_Fru_FLP_F	2022-01-29	1322	0	0.5	0.389279
364	363	Trp_Fru_FLP_F	2022-01-29	1323	0	0.961538	0.424194
365	364	Trp_Fru_FLP_F	2022-01-29	1324	0	0.230769	0.115128
366	365	Trp_Fru_FLP_F	2022-01-29	1325	0	0.384615	0.215385
367	366	Trp_Fru_FLP_F	2022-01-29	1326	0	0.153846	0.0910166
368	367	Trp_Fru_FLP_F	2022-01-29	1327	0	0.346154	0.18349
369	368	Trp_Fru_FLP_F	2022-01-29	1328	0	0.230769	0.127794
370	369	Trp_Fru_FLP_F	2022-01-29	1329	0	2.38462	1.24663
371	370	Trp_Fru_FLP_F	2022-01-29	1330	0	0.653846	0.30353
372	371	Trp_Fru_FLP_F	2022-01-29	1331	0	0.461538	0.230256
373	372	Trp_Fru_FLP_F	2022-01-29	1332	0	0.230769	0.115128
374	373	Trp_Fru_FLP_F	2022-01-29	1333	0	0.307692	0.173376
375	374	Trp_Fru_FLP_F	2022-01-29	1334	0	0.461538	0.223474
376	375	Trp_Fru_FLP_F	2022-01-29	1335	0	0.5	0.201914
377	376	Trp_Fru_FLP_F	2022-01-29	1336	0	0.576923	0.21607
378	377	Trp_Fru_FLP_F	2022-01-29	1337	0	0.230769	0.084265
379	378	Trp_Fru_FLP_F	2022-01-29	1338	0	0.269231	0.118422
380	379	Trp_Fru_FLP_F	2022-01-29	1339	0	0.115385	0.0638971
381	380	Trp_Fru_FLP_F	2022-01-29	1340	0	0.346154	0.156326
382	381	Trp_Fru_FLP_F	2022-01-29	1341	0	0.192308	0.0963843
383	382	Trp_Fru_FLP_F	2022-01-29	1342	0	0.5	0.278733
384	383	Trp_Fru_FLP_F	2022-01-29	1343	0	0.576923	0.35593
385	384	Trp_Fru_FLP_F	2022-01-29	1344	0	0.269231	0.118422
386	385	Trp_Fru_FLP_F	2022-01-29	1345	0	0.0384615	0.0384615
387	386	Trp_Fru_FLP_F	2022-01-29	1346	0	0.269231	0.196568
388	387	Trp_Fru_FLP_F	2022-01-29	1347	0	0.153846	0.106588
389	388	Trp_Fru_FLP_F	2022-01-29	1348	0	0.0384615	0.0384615
390	389	Trp_Fru_FLP_F	2022-01-29	1349	0	0.230769	0.194602
391	390	Trp_Fru_FLP_F	2022-01-29	1350	0	0	0
392	391	Trp_Fru_FLP_F	2022-01-29	1351	0	0.192308	0.136091
393	392	Trp_Fru_FLP_F	2022-01-29	1352	0	0.0769231	0.0532939
394	393	Trp_Fru_FLP_F	2022-01-29	1353	0	0.230769	0.230769
395	394	Trp_Fru_FLP_F	2022-01-29	1354	0	0.153846	0.106588
396	395	Trp_Fru_FLP_F	2022-01-29	1355	0	0.538462	0.389203
397	396	Trp_Fru_FLP_F	2022-01-29	1356	0	1.07692	1.03764
398	397	Trp_Fru_FLP_F	2022-01-29	1357	0	0.884615	0.544418
399	398	Trp_Fru_FLP_F	2022-01-29	1358	0	0.461538	0.324539
400	399	Trp_Fru_FLP_F	2022-01-29	1359	0	0.884615	0.635675
401	400	Trp_Fru_FLP_F	2022-01-29	1360	0	0.807692	0.517447
402	401	Trp_Fru_FLP_F	2022-01-29	1361	0	0.307692	0.133235
403	402	Trp_Fru_FLP_F	2022-01-29	1362	0	0.615385	0.328525
404	403	Trp_Fru_FLP_F	2022-01-29	1363	0	0.307692	0.205832
405	404	Trp_Fru_FLP_F	2022-01-29	1364	0	0.5	0.305085
406	405	Trp_Fru_FLP_F	2022-01-29	1365	0	0.5	0.249615
407	406	Trp_Fru_FLP_F	2022-01-29	1366	0	0.769231	0.334239
408	407	Trp_Fru_FLP_F	2022-01-29	1367	0	0.961538	0.655112
409	408	Trp_Fru_FLP_F	2022-01-29	1368	0	2.19231	1.72673
410	409	Trp_Fru_FLP_F	2022-01-29	1369	0	0.769231	0.389507
411	410	Trp_Fru_FLP_F	2022-01-29	1370	0	0.692308	0.252795
412	411	Trp_Fru_FLP_F	2022-01-29	1371	0	0.384615	0.272182
413	412	Trp_Fru_FLP_F	2022-01-29	1372	0	1.53846	0.798519
414	413	Trp_Fru_FLP_F	2022-01-29	1373	0	0.653846	0.392006
415	414	Trp_Fru_FLP_F	2022-01-29	1374	0	0.5	0.209395
416	415	Trp_Fru_FLP_F	2022-01-29	1375	0	0.653846	0.27142
417	416	Trp_Fru_FLP_F	2022-01-29	1376	0	1.23077	0.506292
418	417	Trp_Fru_FLP_F	2022-01-29	1377	0	2.11538	1.56532
419	418	Trp_Fru_FLP_F	2022-01-29	1378	0	1.69231	0.874896
420	419	Trp_Fru_FLP_F	2022-01-29	1379	0	1.11538	0.329694
421	420	Trp_Fru_FLP_F	2022-01-29	1380	0	0.346154	0.123317
422	421	Trp_Fru_FLP_F	2022-01-29	1381	0	0.807692	0.31388
423	422	Trp_Fru_FLP_F	2022-01-29	1382	0	1.03846	0.530546
424	423	Trp_Fru_FLP_F	2022-01-29	1383	0	0.461538	0.249497
425	424	Trp_Fru_FLP_F	2022-01-29	1384	0	0.423077	0.22987
426	425	Trp_Fru_FLP_F	2022-01-29	1385	0	0.230769	0.100884
427	426	Trp_Fru_FLP_F	2022-01-29	1386	0	0.538462	0.223474
428	427	Trp_Fru_FLP_F	2022-01-29	1387	0	0.730769	0.306633
429	428	Trp_Fru_FLP_F	2022-01-29	1388	0	0.576923	0.388975
430	429	Trp_Fru_FLP_F	2022-01-29	1389	0	0.307692	0.154613
431	430	Trp_Fru_FLP_F	2022-01-29	1390	0	0.423077	0.137819
432	431	Trp_Fru_FLP_F	2022-01-29	1391	0	0.961538	0.40943
433	432	Trp_Fru_FLP_F	2022-01-29	1392	0	0.807692	0.415171
434	433	Trp_Fru_FLP_F	2022-01-29	1393	0	0.961538	0.374087
435	434	Trp_Fru_FLP_F	2022-01-29	1394	0	0.615385	0.215385
436	435	Trp_Fru_FLP_F	2022-01-29	1395	0	0.653846	0.30353
437	436	Trp_Fru_FLP_F	2022-01-29	1396	0	0.884615	0.408852
438	437	Trp_Fru_FLP_F	2022-01-29	1397	0	0.730769	0.257549
439	438	Trp_Fru_FLP_F	2022-01-29	1398	0	1.23077	0.668656
440	439	Trp_Fru_FLP_F	2022-01-29	1399	0	0.923077	0.39193
441	440	Trp_Fru_FLP_F	2022-01-29	1400	0	1.11538	0.468474
442	441	Trp_Fru_FLP_F	2022-01-29	1401	0	0.615385	0.235842
443	442	Trp_Fru_FLP_F	2022-01-29	1402	0	0.961538	0.274455
444	443	Trp_Fru_FLP_F	2022-01-29	1403	0	0.923077	0.327804
445	444	Trp_Fru_FLP_F	2022-01-29	1404	1	1.34615	0.318372
446	445	Trp_Fru_FLP_F	2022-01-29	1405	1	1.61538	0.304211
447	446	Trp_Fru_FLP_F	2022-01-29	1406	2	4.19231	1.46132
448	447	Trp_Fru_FLP_F	2022-01-29	1407	2	1.80769	0.298814
449	448	Trp_Fru_FLP_F	2022-01-29	1408	2	2.46154	0.721602
450	449	Trp_Fru_FLP_F	2022-01-29	1409	1	2.34615	0.69491
451	450	Trp_Fru_FLP_F	2022-01-29	1410	2	1.80769	0.298814
452	451	Trp_Fru_FLP_F	2022-01-29	1411	2	2.34615	0.395911
453	452	Trp_Fru_FLP_F	2022-01-29	1412	2	2	0.254196
454	453	Trp_Fru_FLP_F	2022-01-29	1413	1.5	2.03846	0.488265
455	454	Trp_Fru_FLP_F	2022-01-29	1414	1	2.38462	0.65651
456	455	Trp_Fru_FLP_F	2022-01-29	1415	2	2.42308	0.615625
457	456	Trp_Fru_FLP_F	2022-01-29	1416	1.5	1.65385	0.214421
458	457	Trp_Fru_FLP_F	2022-01-29	1417	1	1.57692	0.324265
459	458	Trp_Fru_FLP_F	2022-01-29	1418	1	2.30769	0.835315
460	459	Trp_Fru_FLP_F	2022-01-29	1419	1	1.61538	0.610364
461	460	Trp_Fru_FLP_F	2022-01-29	1420	2	2	0.40762
462	461	Trp_Fru_FLP_F	2022-01-29	1421	1	1.15385	0.456381
463	462	Trp_Fru_FLP_F	2022-01-29	1422	2	3.23077	1.15866
464	463	Trp_Fru_FLP_F	2022-01-29	1423	1	1.53846	0.267356
465	464	Trp_Fru_FLP_F	2022-01-29	1424	1	1.69231	0.336357
466	465	Trp_Fru_FLP_F	2022-01-29	1425	1	1.69231	0.307692
467	466	Trp_Fru_FLP_F	2022-01-29	1426	1	1.11538	0.250089
468	467	Trp_Fru_FLP_F	2022-01-29	1427	1	2.38462	0.936568
469	468	Trp_Fru_FLP_F	2022-01-29	1428	1	1.03846	0.296029
470	469	Trp_Fru_FLP_F	2022-01-29	1429	1	3.19231	1.93432
471	470	Trp_Fru_FLP_F	2022-01-29	1430	1	0.961538	0.187951
472	471	Trp_Fru_FLP_F	2022-01-29	1431	1	1.26923	0.23243
473	472	Trp_Fru_FLP_F	2022-01-29	1432	1	1	0.175412
474	473	Trp_Fru_FLP_F	2022-01-29	1433	1	1.30769	0.395238
475	474	Trp_Fru_FLP_F	2022-01-29	1434	1	0.884615	0.139526
476	475	Trp_Fru_FLP_F	2022-01-29	1435	1	1.38462	0.333176
477	476	Trp_Fru_FLP_F	2022-01-29	1436	1	1.69231	0.425239
478	477	Trp_Fru_FLP_F	2022-01-29	1437	1.5	1.96154	0.424194
479	478	Trp_Fru_FLP_F	2022-01-29	1438	1	1.5	0.356263
480	479	Trp_Fru_FLP_F	2022-01-29	1439	1	1.57692	0.342718
481	480	Trp_Fru_FLP_F	2022-01-29	0	1	1.23077	0.243738
482	481	Trp_Fru_FLP_F	2022-01-29	1	1	1.42308	0.324265
483	482	Trp_Fru_FLP_F	2022-01-29	2	1	1.80769	0.70606
484	483	Trp_Fru_FLP_F	2022-01-29	3	1	2.65385	1.55409
485	484	Trp_Fru_FLP_F	2022-01-29	4	2	3.34615	1.3598
486	485	Trp_Fru_FLP_F	2022-01-29	5	1	1.53846	0.546966
487	486	Trp_Fru_FLP_F	2022-01-29	6	1	1.92308	0.649078
488	487	Trp_Fru_FLP_F	2022-01-29	7	1	1.34615	0.318372
489	488	Trp_Fru_FLP_F	2022-01-29	8	1	1.5	0.356263
490	489	Trp_Fru_FLP_F	2022-01-29	9	1	1.15385	0.21262
491	490	Trp_Fru_FLP_F	2022-01-29	10	1	1.03846	0.280004
492	491	Trp_Fru_FLP_F	2022-01-29	11	1	1.15385	0.246154
493	492	Trp_Fru_FLP_F	2022-01-29	12	1	1.5	0.40096
494	493	Trp_Fru_FLP_F	2022-01-29	13	0	1.88462	0.950023
495	494	Trp_Fru_FLP_F	2022-01-29	14	0.5	0.807692	0.192308
496	495	Trp_Fru_FLP_F	2022-01-29	15	1	1.07692	0.199407
497	496	Trp_Fru_FLP_F	2022-01-29	16	1.5	1.53846	0.294727
498	497	Trp_Fru_FLP_F	2022-01-29	17	1	1.26923	0.218792
499	498	Trp_Fru_FLP_F	2022-01-29	18	1	1.38462	0.342286
500	499	Trp_Fru_FLP_F	2022-01-29	19	0	1.15385	0.331395
501	500	Trp_Fru_FLP_F	2022-01-29	20	1	1.38462	0.404121
502	501	Trp_Fru_FLP_F	2022-01-29	21	1	0.884615	0.186687
503	502	Trp_Fru_FLP_F	2022-01-29	22	0	0.961538	0.335035
504	503	Trp_Fru_FLP_F	2022-01-29	23	1.5	2.42308	0.798408
505	504	Trp_Fru_FLP_F	2022-01-29	24	1	0.961538	0.203665
506	505	Trp_Fru_FLP_F	2022-01-29	25	1	1.19231	0.241911
507	506	Trp_Fru_FLP_F	2022-01-29	26	0	1.26923	0.580604
508	507	Trp_Fru_FLP_F	2022-01-29	27	1	1.61538	0.602755
509	508	Trp_Fru_FLP_F	2022-01-29	28	1	0.961538	0.23192
510	509	Trp_Fru_FLP_F	2022-01-29	29	0	1.19231	0.323534
511	510	Trp_Fru_FLP_F	2022-01-29	30	1	0.961538	0.203665
512	511	Trp_Fru_FLP_F	2022-01-29	31	0.5	0.692308	0.154613
513	512	Trp_Fru_FLP_F	2022-01-29	32	1	0.846154	0.197619
514	513	Trp_Fru_FLP_F	2022-01-29	33	1	2.80769	1.16357
515	514	Trp_Fru_FLP_F	2022-01-29	34	1	1.5	0.633063
516	515	Trp_Fru_FLP_F	2022-01-29	35	0	0.615385	0.147564
517	516	Trp_Fru_FLP_F	2022-01-29	36	0	0.769231	0.194602
518	517	Trp_Fru_FLP_F	2022-01-29	37	0	0.423077	0.137819
519	518	Trp_Fru_FLP_F	2022-01-29	38	0.5	0.730769	0.196568
520	519	Trp_Fru_FLP_F	2022-01-29	39	0	0.615385	0.16712
521	520	Trp_Fru_FLP_F	2022-01-29	40	0	0.423077	0.126163
522	521	Trp_Fru_FLP_F	2022-01-29	41	0	0.923077	0.308461
523	522	Trp_Fru_FLP_F	2022-01-29	42	0	0.384615	0.124985
524	523	Trp_Fru_FLP_F	2022-01-29	43	0	0.576923	0.158581
525	524	Trp_Fru_FLP_F	2022-01-29	44	0	2.73077	1.42673
526	525	Trp_Fru_FLP_F	2022-01-29	45	0	1.19231	0.41886
527	526	Trp_Fru_FLP_F	2022-01-29	46	0	1.84615	0.77
528	527	Trp_Fru_FLP_F	2022-01-29	47	1	0.846154	0.189674
529	528	Trp_Fru_FLP_F	2022-01-29	48	1	1.19231	0.337499
530	529	Trp_Fru_FLP_F	2022-01-29	49	0	1.11538	0.465178
531	530	Trp_Fru_FLP_F	2022-01-29	50	0	0.769231	0.186529
532	531	Trp_Fru_FLP_F	2022-01-29	51	0	1.19231	0.350908
533	532	Trp_Fru_FLP_F	2022-01-29	52	0	1.73077	0.814404
534	533	Trp_Fru_FLP_F	2022-01-29	53	0.5	0.846154	0.21262
535	534	Trp_Fru_FLP_F	2022-01-29	54	0	0.807692	0.467462
536	535	Trp_Fru_FLP_F	2022-01-29	55	0	1.30769	0.439473
537	536	Trp_Fru_FLP_F	2022-01-29	56	0	0.576923	0.176923
538	537	Trp_Fru_FLP_F	2022-01-29	57	0	1.07692	0.690425
539	538	Trp_Fru_FLP_F	2022-01-29	58	0	0.576923	0.255241
540	539	Trp_Fru_FLP_F	2022-01-29	59	0	0.692308	0.312652
541	540	Trp_Fru_FLP_F	2022-01-29	60	0.5	2.5	1.82736
542	541	Trp_Fru_FLP_F	2022-01-29	61	0	2.5	1.0986
543	542	Trp_Fru_FLP_F	2022-01-29	62	0.5	0.730769	0.162269
544	543	Trp_Fru_FLP_F	2022-01-29	63	0	1.11538	0.360883
545	544	Trp_Fru_FLP_F	2022-01-29	64	0	0.5	0.138675
546	545	Trp_Fru_FLP_F	2022-01-29	65	0	0.269231	0.118422
547	546	Trp_Fru_FLP_F	2022-01-29	66	0.5	1.26923	0.339944
548	547	Trp_Fru_FLP_F	2022-01-29	67	0	1.73077	0.920798
549	548	Trp_Fru_FLP_F	2022-01-29	68	0	0.346154	0.146154
550	549	Trp_Fru_FLP_F	2022-01-29	69	0	1.19231	0.411449
551	550	Trp_Fru_FLP_F	2022-01-29	70	0	0.769231	0.230769
552	551	Trp_Fru_FLP_F	2022-01-29	71	0	0.346154	0.123317
553	552	Trp_Fru_FLP_F	2022-01-29	72	0	1.07692	0.476923
554	553	Trp_Fru_FLP_F	2022-01-29	73	0.5	2.03846	1.23223
555	554	Trp_Fru_FLP_F	2022-01-29	74	0	1.92308	1.45277
556	555	Trp_Fru_FLP_F	2022-01-29	75	0	0.730769	0.280427
557	556	Trp_Fru_FLP_F	2022-01-29	76	0	0.576923	0.249141
558	557	Trp_Fru_FLP_F	2022-01-29	77	0	0.769231	0.360801
559	558	Trp_Fru_FLP_F	2022-01-29	78	0	1.84615	1.34243
560	559	Trp_Fru_FLP_F	2022-01-29	79	0	0.384615	0.184615
561	560	Trp_Fru_FLP_F	2022-01-29	80	0	0.692308	0.213175
562	561	Trp_Fru_FLP_F	2022-01-29	81	0	0.307692	0.121139
563	562	Trp_Fru_FLP_F	2022-01-29	82	0	0.423077	0.137819
564	563	Trp_Fru_FLP_F	2022-01-29	83	0	0.730769	0.23243
565	564	Trp_Fru_FLP_F	2022-01-29	84	0	0.384615	0.184615
566	565	Trp_Fru_FLP_F	2022-01-29	85	0	0.538462	0.185893
567	566	Trp_Fru_FLP_F	2022-01-29	86	0	0.384615	0.208119
568	567	Trp_Fru_FLP_F	2022-01-29	87	0	0.884615	0.295228
569	568	Trp_Fru_FLP_F	2022-01-29	88	0	1.23077	0.582588
570	569	Trp_Fru_FLP_F	2022-01-29	89	0	0.230769	0.139314
571	570	Trp_Fru_FLP_F	2022-01-29	90	0	0.230769	0.100884
572	571	Trp_Fru_FLP_F	2022-01-29	91	0	0.653846	0.265691
573	572	Trp_Fru_FLP_F	2022-01-29	92	0	0.5	0.138675
574	573	Trp_Fru_FLP_F	2022-01-29	93	0	0.692308	0.213175
575	574	Trp_Fru_FLP_F	2022-01-29	94	0	0.730769	0.28586
576	575	Trp_Fru_FLP_F	2022-01-29	95	0	1.23077	0.538681
577	576	Trp_Fru_FLP_F	2022-01-29	96	0	0.615385	0.235842
578	577	Trp_Fru_FLP_F	2022-01-29	97	0	0.692308	0.240315
579	578	Trp_Fru_FLP_F	2022-01-29	98	0	0.538462	0.223474
580	579	Trp_Fru_FLP_F	2022-01-29	99	0	0.692308	0.227151
581	580	Trp_Fru_FLP_F	2022-01-29	100	0	0.5	0.315009
582	581	Trp_Fru_FLP_F	2022-01-29	101	0	0.192308	0.0788227
583	582	Trp_Fru_FLP_F	2022-01-29	102	0	0.576923	0.319486
584	583	Trp_Fru_FLP_F	2022-01-29	103	0	0.692308	0.258809
585	584	Trp_Fru_FLP_F	2022-01-29	104	0	0.423077	0.158581
586	585	Trp_Fru_FLP_F	2022-01-29	105	0	0.384615	0.176085
587	586	Trp_Fru_FLP_F	2022-01-29	106	0	0.653846	0.265691
588	587	Trp_Fru_FLP_F	2022-01-29	107	0	0.192308	0.0963843
589	588	Trp_Fru_FLP_F	2022-01-29	108	0	0.269231	0.162269
590	589	Trp_Fru_FLP_F	2022-01-29	109	0	0.384615	0.192769
591	590	Trp_Fru_FLP_F	2022-01-29	110	0	0.192308	0.0788227
592	591	Trp_Fru_FLP_F	2022-01-29	111	0	0.384615	0.192769
593	592	Trp_Fru_FLP_F	2022-01-29	112	0	0.384615	0.184615
594	593	Trp_Fru_FLP_F	2022-01-29	113	0	0.346154	0.18349
595	594	Trp_Fru_FLP_F	2022-01-29	114	0	0.5	0.201914
596	595	Trp_Fru_FLP_F	2022-01-29	115	0	0.230769	0.100884
597	596	Trp_Fru_FLP_F	2022-01-29	116	0	0.769231	0.408779
598	597	Trp_Fru_FLP_F	2022-01-29	117	0	0.423077	0.176923
599	598	Trp_Fru_FLP_F	2022-01-29	118	0	0.192308	0.0963843
600	599	Trp_Fru_FLP_F	2022-01-29	119	0	0.269231	0.162269
601	600	Trp_Fru_FLP_F	2022-01-29	120	0	0.346154	0.191691
602	601	Trp_Fru_FLP_F	2022-01-29	121	0	0.192308	0.124273
603	602	Trp_Fru_FLP_F	2022-01-29	122	0	0.307692	0.164263
604	603	Trp_Fru_FLP_F	2022-01-29	123	0	0.346154	0.191691
605	604	Trp_Fru_FLP_F	2022-01-29	124	0	0.5	0.186052
606	605	Trp_Fru_FLP_F	2022-01-29	125	0	0.307692	0.121139
607	606	Trp_Fru_FLP_F	2022-01-29	126	0	0.307692	0.121139
608	607	Trp_Fru_FLP_F	2022-01-29	127	0	0.769231	0.284511
609	608	Trp_Fru_FLP_F	2022-01-29	128	0	0.538462	0.255588
610	609	Trp_Fru_FLP_F	2022-01-29	129	0	0.538462	0.177424
611	610	Trp_Fru_FLP_F	2022-01-29	130	0	1.38462	1.03638
612	611	Trp_Fru_FLP_F	2022-01-29	131	0	0.384615	0.16712
613	612	Trp_Fru_FLP_F	2022-01-29	132	0	0.192308	0.0963843
614	613	Trp_Fru_FLP_F	2022-01-29	133	0	1.73077	1.41916
615	614	Trp_Fru_FLP_F	2022-01-29	134	0	0.153846	0.120158
616	615	Trp_Fru_FLP_F	2022-01-29	135	0	0.153846	0.0910166
617	616	Trp_Fru_FLP_F	2022-01-29	136	0	0.846154	0.264239
618	617	Trp_Fru_FLP_F	2022-01-29	137	0	0.384615	0.184615
619	618	Trp_Fru_FLP_F	2022-01-29	138	0	0.307692	0.198217
620	619	Trp_Fru_FLP_F	2022-01-29	139	0	0.307692	0.173376
621	620	Trp_Fru_FLP_F	2022-01-29	140	0	0.576923	0.499763
622	621	Trp_Fru_FLP_F	2022-01-29	141	0	0.461538	0.243252
623	622	Trp_Fru_FLP_F	2022-01-29	142	0	0.115385	0.0638971
624	623	Trp_Fru_FLP_F	2022-01-29	143	0	0.384615	0.222413
625	624	Trp_Fru_FLP_F	2022-01-29	144	0	0.153846	0.0910166
626	625	Trp_Fru_FLP_F	2022-01-29	145	0	1.30769	1.15128
627	626	Trp_Fru_FLP_F	2022-01-29	146	0	0.192308	0.111206
628	627	Trp_Fru_FLP_F	2022-01-29	147	0	1.11538	0.434394
629	628	Trp_Fru_FLP_F	2022-01-29	148	0	0.230769	0.194602
630	629	Trp_Fru_FLP_F	2022-01-29	149	0	1.15385	1.03581
631	630	Trp_Fru_FLP_F	2022-01-29	150	0	2.53846	2.26154
632	631	Trp_Fru_FLP_F	2022-01-29	151	0	0.423077	0.148563
633	632	Trp_Fru_FLP_F	2022-01-29	152	0	0.230769	0.115128
634	633	Trp_Fru_FLP_F	2022-01-29	153	0	0.230769	0.159882
635	634	Trp_Fru_FLP_F	2022-01-29	154	0	0.346154	0.199556
636	635	Trp_Fru_FLP_F	2022-01-29	155	0	0.230769	0.127794
637	636	Trp_Fru_FLP_F	2022-01-29	156	0	0.115385	0.0846154
638	637	Trp_Fru_FLP_F	2022-01-29	157	0	0.423077	0.385
639	638	Trp_Fru_FLP_F	2022-01-29	158	0	0.307692	0.233826
640	639	Trp_Fru_FLP_F	2022-01-29	159	0	0.115385	0.0638971
641	640	Trp_Fru_FLP_F	2022-01-29	160	0	0.115385	0.0638971
642	641	Trp_Fru_FLP_F	2022-01-29	161	0	0.230769	0.159882
643	642	Trp_Fru_FLP_F	2022-01-29	162	0	0.423077	0.278309
644	643	Trp_Fru_FLP_F	2022-01-29	163	0	0.846154	0.417658
645	644	Trp_Fru_FLP_F	2022-01-29	164	0	0.269231	0.171488
646	645	Trp_Fru_FLP_F	2022-01-29	165	0	0.115385	0.0846154
647	646	Trp_Fru_FLP_F	2022-01-29	166	0	0.0769231	0.0532939
648	647	Trp_Fru_FLP_F	2022-01-29	167	0	0.115385	0.0846154
649	648	Trp_Fru_FLP_F	2022-01-29	168	0	0.115385	0.0846154
650	649	Trp_Fru_FLP_F	2022-01-29	169	0	0.230769	0.169231
651	650	Trp_Fru_FLP_F	2022-01-29	170	0	0.384615	0.288641
652	651	Trp_Fru_FLP_F	2022-01-29	171	0	0.269231	0.188579
653	652	Trp_Fru_FLP_F	2022-01-29	172	0	0.307692	0.270437
654	653	Trp_Fru_FLP_F	2022-01-29	173	0	0.115385	0.115385
655	654	Trp_Fru_FLP_F	2022-01-29	174	0	0.0769231	0.0769231
656	655	Trp_Fru_FLP_F	2022-01-29	175	0	0.230769	0.127794
657	656	Trp_Fru_FLP_F	2022-01-29	176	0	0.5	0.360555
658	657	Trp_Fru_FLP_F	2022-01-29	177	0	0.384615	0.314163
659	658	Trp_Fru_FLP_F	2022-01-29	178	0	0.192308	0.111206
660	659	Trp_Fru_FLP_F	2022-01-29	179	0	0.730769	0.390494
661	660	Trp_Fru_FLP_F	2022-01-29	180	0	0.615385	0.540874
662	661	Trp_Fru_FLP_F	2022-01-29	181	0	0	0
663	662	Trp_Fru_FLP_F	2022-01-29	182	0	0.192308	0.136091
664	663	Trp_Fru_FLP_F	2022-01-29	183	0	0.192308	0.157081
665	664	Trp_Fru_FLP_F	2022-01-29	184	0	0.230769	0.159882
666	665	Trp_Fru_FLP_F	2022-01-29	185	0	0.0384615	0.0384615
667	666	Trp_Fru_FLP_F	2022-01-29	186	0	0.269231	0.171488
668	667	Trp_Fru_FLP_F	2022-01-29	187	0	0.192308	0.111206
669	668	Trp_Fru_FLP_F	2022-01-29	188	0	0.192308	0.111206
670	669	Trp_Fru_FLP_F	2022-01-29	189	0	0.5	0.347519
671	670	Trp_Fru_FLP_F	2022-01-29	190	0	0.115385	0.0846154
672	671	Trp_Fru_FLP_F	2022-01-29	191	0	0.115385	0.0846154
673	672	Trp_Fru_FLP_F	2022-01-29	192	0	0.153846	0.0910166
674	673	Trp_Fru_FLP_F	2022-01-29	193	0	0.423077	0.385
675	674	Trp_Fru_FLP_F	2022-01-29	194	0	0.307692	0.233826
676	675	Trp_Fru_FLP_F	2022-01-29	195	0	0.269231	0.196568
677	676	Trp_Fru_FLP_F	2022-01-29	196	0	0.153846	0.0910166
678	677	Trp_Fru_FLP_F	2022-01-29	197	0	0.269231	0.196568
679	678	Trp_Fru_FLP_F	2022-01-29	198	0	0.0384615	0.0384615
680	679	Trp_Fru_FLP_F	2022-01-29	199	0	0.153846	0.106588
681	680	Trp_Fru_FLP_F	2022-01-29	200	0	0.0769231	0.0532939
682	681	Trp_Fru_FLP_F	2022-01-29	201	0	0.0769231	0.0769231
683	682	Trp_Fru_FLP_F	2022-01-29	202	0	0.153846	0.120158
684	683	Trp_Fru_FLP_F	2022-01-29	203	0	0.115385	0.0846154
685	684	Trp_Fru_FLP_F	2022-01-29	204	0	0.269231	0.269231
686	685	Trp_Fru_FLP_F	2022-01-29	205	0	0	0
687	686	Trp_Fru_FLP_F	2022-01-29	206	0	0.0769231	0.0769231
688	687	Trp_Fru_FLP_F	2022-01-29	207	0	0	0
689	688	Trp_Fru_FLP_F	2022-01-29	208	0	0.0384615	0.0384615
690	689	Trp_Fru_FLP_F	2022-01-29	209	0	0.153846	0.120158
691	690	Trp_Fru_FLP_F	2022-01-29	210	0	0	0
692	691	Trp_Fru_FLP_F	2022-01-29	211	0	0.0769231	0.0769231
693	692	Trp_Fru_FLP_F	2022-01-29	212	0	0.0384615	0.0384615
694	693	Trp_Fru_FLP_F	2022-01-29	213	0	0	0
695	694	Trp_Fru_FLP_F	2022-01-29	214	0	0.115385	0.0846154
696	695	Trp_Fru_FLP_F	2022-01-29	215	0	0	0
697	696	Trp_Fru_FLP_F	2022-01-29	216	0	0	0
698	697	Trp_Fru_FLP_F	2022-01-29	217	0	0	0
699	698	Trp_Fru_FLP_F	2022-01-29	218	0	0.0384615	0.0384615
700	699	Trp_Fru_FLP_F	2022-01-29	219	0	0.0384615	0.0384615
701	700	Trp_Fru_FLP_F	2022-01-29	220	0	0	0
702	701	Trp_Fru_FLP_F	2022-01-29	221	0	0.384615	0.384615
703	702	Trp_Fru_FLP_F	2022-01-29	222	0	0	0
704	703	Trp_Fru_FLP_F	2022-01-29	223	0	0	0
705	704	Trp_Fru_FLP_F	2022-01-29	224	0	0.192308	0.192308
706	705	Trp_Fru_FLP_F	2022-01-29	225	0	0.0769231	0.0769231
707	706	Trp_Fru_FLP_F	2022-01-29	226	0	0.269231	0.269231
708	707	Trp_Fru_FLP_F	2022-01-29	227	0	0.423077	0.423077
709	708	Trp_Fru_FLP_F	2022-01-29	228	0	0	0
710	709	Trp_Fru_FLP_F	2022-01-29	229	0	0	0
711	710	Trp_Fru_FLP_F	2022-01-29	230	0	0.0769231	0.0769231
712	711	Trp_Fru_FLP_F	2022-01-29	231	0	0.384615	0.222413
713	712	Trp_Fru_FLP_F	2022-01-29	232	0	0.153846	0.120158
714	713	Trp_Fru_FLP_F	2022-01-29	233	0	0.461538	0.389203
715	714	Trp_Fru_FLP_F	2022-01-29	234	0	0.384615	0.176085
716	715	Trp_Fru_FLP_F	2022-01-29	235	0	0.423077	0.261199
717	716	Trp_Fru_FLP_F	2022-01-29	236	0	0.153846	0.106588
718	717	Trp_Fru_FLP_F	2022-01-29	237	0	0.153846	0.106588
719	718	Trp_Fru_FLP_F	2022-01-29	238	0	0.153846	0.106588
720	719	Trp_Fru_FLP_F	2022-01-29	239	0	0.423077	0.267024
721	720	Trp_Fru_FLP_F	2022-01-29	240	0	0.115385	0.0846154
722	721	Trp_Fru_FLP_F	2022-01-29	241	0	0.192308	0.157081
723	722	Trp_Fru_FLP_F	2022-01-29	242	0	0.192308	0.124273
724	723	Trp_Fru_FLP_F	2022-01-29	243	0	0.230769	0.194602
725	724	Trp_Fru_FLP_F	2022-01-29	244	0	0	0
726	725	Trp_Fru_FLP_F	2022-01-29	245	0	0	0
727	726	Trp_Fru_FLP_F	2022-01-29	246	0	0	0
728	727	Trp_Fru_FLP_F	2022-01-29	247	0	0	0
729	728	Trp_Fru_FLP_F	2022-01-29	248	0	0	0
730	729	Trp_Fru_FLP_F	2022-01-29	249	0	0	0
731	730	Trp_Fru_FLP_F	2022-01-29	250	0	0.230769	0.194602
732	731	Trp_Fru_FLP_F	2022-01-29	251	0	0.0384615	0.0384615
733	732	Trp_Fru_FLP_F	2022-01-29	252	0	0.115385	0.115385
734	733	Trp_Fru_FLP_F	2022-01-29	253	0	0	0
735	734	Trp_Fru_FLP_F	2022-01-29	254	0	0	0
736	735	Trp_Fru_FLP_F	2022-01-29	255	0	0.0769231	0.0769231
737	736	Trp_Fru_FLP_F	2022-01-29	256	0	0.115385	0.0846154
738	737	Trp_Fru_FLP_F	2022-01-29	257	0	0.153846	0.120158
739	738	Trp_Fru_FLP_F	2022-01-29	258	0	0.346154	0.241421
740	739	Trp_Fru_FLP_F	2022-01-29	259	0	0.0769231	0.0769231
741	740	Trp_Fru_FLP_F	2022-01-29	260	0	0.0769231	0.0769231
742	741	Trp_Fru_FLP_F	2022-01-29	261	0	0.153846	0.153846
743	742	Trp_Fru_FLP_F	2022-01-29	262	0	0	0
744	743	Trp_Fru_FLP_F	2022-01-29	263	0	0.5	0.5
745	744	Trp_Fru_FLP_F	2022-01-29	264	0	0.0384615	0.0384615
746	745	Trp_Fru_FLP_F	2022-01-29	265	0	0	0
747	746	Trp_Fru_FLP_F	2022-01-29	266	0	0.192308	0.157081
748	747	Trp_Fru_FLP_F	2022-01-29	267	0	0.0769231	0.0769231
749	748	Trp_Fru_FLP_F	2022-01-29	268	0	0.269231	0.23243
750	749	Trp_Fru_FLP_F	2022-01-29	269	0	0	0
751	750	Trp_Fru_FLP_F	2022-01-29	270	0	0.0384615	0.0384615
752	751	Trp_Fru_FLP_F	2022-01-29	271	0	0.115385	0.115385
753	752	Trp_Fru_FLP_F	2022-01-29	272	0	0.0384615	0.0384615
754	753	Trp_Fru_FLP_F	2022-01-29	273	0	0	0
755	754	Trp_Fru_FLP_F	2022-01-29	274	0	0	0
756	755	Trp_Fru_FLP_F	2022-01-29	275	0	0	0
757	756	Trp_Fru_FLP_F	2022-01-29	276	0	0.192308	0.136091
758	757	Trp_Fru_FLP_F	2022-01-29	277	0	0.576923	0.576923
759	758	Trp_Fru_FLP_F	2022-01-29	278	0	0.0384615	0.0384615
760	759	Trp_Fru_FLP_F	2022-01-29	279	0	0.115385	0.115385
761	760	Trp_Fru_FLP_F	2022-01-29	280	0	0.0384615	0.0384615
762	761	Trp_Fru_FLP_F	2022-01-29	281	0	0.0769231	0.0532939
763	762	Trp_Fru_FLP_F	2022-01-29	282	0	0.192308	0.136091
764	763	Trp_Fru_FLP_F	2022-01-29	283	0	0.153846	0.120158
765	764	Trp_Fru_FLP_F	2022-01-29	284	0	0	0
766	765	Trp_Fru_FLP_F	2022-01-29	285	0	0	0
767	766	Trp_Fru_FLP_F	2022-01-29	286	0	0.0384615	0.0384615
768	767	Trp_Fru_FLP_F	2022-01-29	287	0	0	0
769	768	Trp_Fru_FLP_F	2022-01-29	288	0	0.269231	0.23243
770	769	Trp_Fru_FLP_F	2022-01-29	289	0	0	0
771	770	Trp_Fru_FLP_F	2022-01-29	290	0	0.0769231	0.0769231
772	771	Trp_Fru_FLP_F	2022-01-29	291	0	0.576923	0.44436
773	772	Trp_Fru_FLP_F	2022-01-29	292	0	1.11538	0.905244
774	773	Trp_Fru_FLP_F	2022-01-29	293	0	0	0
775	774	Trp_Fru_FLP_F	2022-01-29	294	0	0	0
776	775	Trp_Fru_FLP_F	2022-01-29	295	0	0	0
777	776	Trp_Fru_FLP_F	2022-01-29	296	0	0	0
778	777	Trp_Fru_FLP_F	2022-01-29	297	0	0	0
779	778	Trp_Fru_FLP_F	2022-01-29	298	0	0.115385	0.115385
780	779	Trp_Fru_FLP_F	2022-01-29	299	0	0	0
781	780	Trp_Fru_FLP_F	2022-01-29	300	0	0	0
782	781	Trp_Fru_FLP_F	2022-01-29	301	0	0.0769231	0.0769231
783	782	Trp_Fru_FLP_F	2022-01-29	302	0	0.423077	0.294426
784	783	Trp_Fru_FLP_F	2022-01-29	303	0	0	0
785	784	Trp_Fru_FLP_F	2022-01-29	304	0	0	0
786	785	Trp_Fru_FLP_F	2022-01-29	305	0	0	0
787	786	Trp_Fru_FLP_F	2022-01-29	306	0	0.153846	0.153846
788	787	Trp_Fru_FLP_F	2022-01-29	307	0	0	0
789	788	Trp_Fru_FLP_F	2022-01-29	308	0	0.192308	0.192308
790	789	Trp_Fru_FLP_F	2022-01-29	309	0	0.0769231	0.0769231
791	790	Trp_Fru_FLP_F	2022-01-29	310	0	0.115385	0.115385
792	791	Trp_Fru_FLP_F	2022-01-29	311	0	0.423077	0.351581
793	792	Trp_Fru_FLP_F	2022-01-29	312	0	1.23077	1.07747
794	793	Trp_Fru_FLP_F	2022-01-29	313	0	0.5	0.373136
795	794	Trp_Fru_FLP_F	2022-01-29	314	0	0.0384615	0.0384615
796	795	Trp_Fru_FLP_F	2022-01-29	315	0	0.423077	0.242887
797	796	Trp_Fru_FLP_F	2022-01-29	316	0	0.5	0.461603
798	797	Trp_Fru_FLP_F	2022-01-29	317	0	0.115385	0.115385
799	798	Trp_Fru_FLP_F	2022-01-29	318	0	0.769231	0.455083
800	799	Trp_Fru_FLP_F	2022-01-29	319	0	0.346154	0.241421
801	800	Trp_Fru_FLP_F	2022-01-29	320	0	0.307692	0.240315
802	801	Trp_Fru_FLP_F	2022-01-29	321	0	0.576923	0.249141
803	802	Trp_Fru_FLP_F	2022-01-29	322	0	0.0769231	0.0769231
804	803	Trp_Fru_FLP_F	2022-01-29	323	0	0.115385	0.115385
805	804	Trp_Fru_FLP_F	2022-01-29	324	0	0.461538	0.389203
806	805	Trp_Fru_FLP_F	2022-01-29	325	0	0.0384615	0.0384615
807	806	Trp_Fru_FLP_F	2022-01-29	326	0	0	0
808	807	Trp_Fru_FLP_F	2022-01-29	327	0	0.153846	0.120158
809	808	Trp_Fru_FLP_F	2022-01-29	328	0	0.0769231	0.0532939
810	809	Trp_Fru_FLP_F	2022-01-29	329	0	0.115385	0.115385
811	810	Trp_Fru_FLP_F	2022-01-29	330	0	0.0769231	0.0769231
812	811	Trp_Fru_FLP_F	2022-01-29	331	0	0.115385	0.115385
813	812	Trp_Fru_FLP_F	2022-01-29	332	0	0.0384615	0.0384615
814	813	Trp_Fru_FLP_F	2022-01-29	333	0	0.461538	0.294727
815	814	Trp_Fru_FLP_F	2022-01-29	334	0	0.269231	0.171488
816	815	Trp_Fru_FLP_F	2022-01-29	335	0	0	0
817	816	Trp_Fru_FLP_F	2022-01-29	336	0	0	0
818	817	Trp_Fru_FLP_F	2022-01-29	337	0	0	0
819	818	Trp_Fru_FLP_F	2022-01-29	338	0	0.230769	0.159882
820	819	Trp_Fru_FLP_F	2022-01-29	339	0	0.269231	0.269231
821	820	Trp_Fru_FLP_F	2022-01-29	340	0	0.269231	0.162269
822	821	Trp_Fru_FLP_F	2022-01-29	341	0	0.307692	0.270437
823	822	Trp_Fru_FLP_F	2022-01-29	342	0	0.0769231	0.0769231
824	823	Trp_Fru_FLP_F	2022-01-29	343	0	0.0384615	0.0384615
825	824	Trp_Fru_FLP_F	2022-01-29	344	0	0.0769231	0.0769231
826	825	Trp_Fru_FLP_F	2022-01-29	345	0	0.192308	0.192308
827	826	Trp_Fru_FLP_F	2022-01-29	346	0	0.0769231	0.0769231
828	827	Trp_Fru_FLP_F	2022-01-29	347	0	0.0769231	0.0769231
829	828	Trp_Fru_FLP_F	2022-01-29	348	0	0	0
830	829	Trp_Fru_FLP_F	2022-01-29	349	0	0.115385	0.115385
831	830	Trp_Fru_FLP_F	2022-01-29	350	0	0.115385	0.0846154
832	831	Trp_Fru_FLP_F	2022-01-29	351	0	0	0
833	832	Trp_Fru_FLP_F	2022-01-29	352	0	0.0769231	0.0532939
834	833	Trp_Fru_FLP_F	2022-01-29	353	0	1.03846	0.720002
835	834	Trp_Fru_FLP_F	2022-01-29	354	0	0.692308	0.459997
836	835	Trp_Fru_FLP_F	2022-01-29	355	0	0.269231	0.171488
837	836	Trp_Fru_FLP_F	2022-01-29	356	0	0.0769231	0.0769231
838	837	Trp_Fru_FLP_F	2022-01-29	357	0	0.153846	0.153846
839	838	Trp_Fru_FLP_F	2022-01-29	358	0	0.153846	0.106588
840	839	Trp_Fru_FLP_F	2022-01-29	359	0	0.615385	0.502538
841	840	Trp_Fru_FLP_F	2022-01-29	360	0	0.538462	0.461538
842	841	Trp_Fru_FLP_F	2022-01-29	361	0	0.576923	0.408272
843	842	Trp_Fru_FLP_F	2022-01-29	362	0	0.0769231	0.0532939
844	843	Trp_Fru_FLP_F	2022-01-29	363	0	0.192308	0.111206
845	844	Trp_Fru_FLP_F	2022-01-29	364	0	0.153846	0.0721602
846	845	Trp_Fru_FLP_F	2022-01-29	365	0	0.846154	0.57564
847	846	Trp_Fru_FLP_F	2022-01-29	366	0	0.230769	0.159882
848	847	Trp_Fru_FLP_F	2022-01-29	367	0	0.307692	0.240315
849	848	Trp_Fru_FLP_F	2022-01-29	368	0	1.11538	0.825231
850	849	Trp_Fru_FLP_F	2022-01-29	369	0	0.0769231	0.0532939
851	850	Trp_Fru_FLP_F	2022-01-29	370	0	0.461538	0.294727
852	851	Trp_Fru_FLP_F	2022-01-29	371	0	0	0
853	852	Trp_Fru_FLP_F	2022-01-29	372	0	0.0384615	0.0384615
854	853	Trp_Fru_FLP_F	2022-01-29	373	0	0.307692	0.182033
855	854	Trp_Fru_FLP_F	2022-01-29	374	0	0.538462	0.329245
856	855	Trp_Fru_FLP_F	2022-01-29	375	0	0.307692	0.190297
857	856	Trp_Fru_FLP_F	2022-01-29	376	0	0.192308	0.136091
858	857	Trp_Fru_FLP_F	2022-01-29	377	0	0.115385	0.115385
859	858	Trp_Fru_FLP_F	2022-01-29	378	0	0.0769231	0.0769231
860	859	Trp_Fru_FLP_F	2022-01-29	379	0	0.307692	0.240315
861	860	Trp_Fru_FLP_F	2022-01-29	380	0	0.846154	0.77
862	861	Trp_Fru_FLP_F	2022-01-29	381	0	0.192308	0.192308
863	862	Trp_Fru_FLP_F	2022-01-29	382	0	0.115385	0.115385
864	863	Trp_Fru_FLP_F	2022-01-29	383	0	0.384615	0.242277
865	864	Trp_Fru_FLP_F	2022-01-29	384	0	0.0769231	0.0769231
866	865	Trp_Fru_FLP_F	2022-01-29	385	0	0.0384615	0.0384615
867	866	Trp_Fru_FLP_F	2022-01-29	386	0	0.346154	0.191691
868	867	Trp_Fru_FLP_F	2022-01-29	387	0	0.692308	0.692308
869	868	Trp_Fru_FLP_F	2022-01-29	388	0	0.961538	0.757487
870	869	Trp_Fru_FLP_F	2022-01-29	389	0	0.307692	0.270437
871	870	Trp_Fru_FLP_F	2022-01-29	390	0	0.192308	0.192308
872	871	Trp_Fru_FLP_F	2022-01-29	391	0	0	0
873	872	Trp_Fru_FLP_F	2022-01-29	392	0	0.192308	0.136091
874	873	Trp_Fru_FLP_F	2022-01-29	393	0	0.0769231	0.0532939
875	874	Trp_Fru_FLP_F	2022-01-29	394	0	0.0769231	0.0769231
876	875	Trp_Fru_FLP_F	2022-01-29	395	0	0.192308	0.157081
877	876	Trp_Fru_FLP_F	2022-01-29	396	0	0.307692	0.307692
878	877	Trp_Fru_FLP_F	2022-01-29	397	0	0.115385	0.115385
879	878	Trp_Fru_FLP_F	2022-01-29	398	0	0.0384615	0.0384615
880	879	Trp_Fru_FLP_F	2022-01-29	399	0	0	0
881	880	Trp_Fru_FLP_F	2022-01-29	400	0	0	0
882	881	Trp_Fru_FLP_F	2022-01-29	401	0	0.0384615	0.0384615
883	882	Trp_Fru_FLP_F	2022-01-29	402	0	0	0
884	883	Trp_Fru_FLP_F	2022-01-29	403	0	0	0
885	884	Trp_Fru_FLP_F	2022-01-29	404	0	0.269231	0.269231
886	885	Trp_Fru_FLP_F	2022-01-29	405	0	0.307692	0.307692
887	886	Trp_Fru_FLP_F	2022-01-29	406	0	0	0
888	887	Trp_Fru_FLP_F	2022-01-29	407	0	0	0
889	888	Trp_Fru_FLP_F	2022-01-29	408	0	0	0
890	889	Trp_Fru_FLP_F	2022-01-29	409	0	0	0
891	890	Trp_Fru_FLP_F	2022-01-29	410	0	0	0
892	891	Trp_Fru_FLP_F	2022-01-29	411	0	0	0
893	892	Trp_Fru_FLP_F	2022-01-29	412	0	0	0
894	893	Trp_Fru_FLP_F	2022-01-29	413	0	0	0
895	894	Trp_Fru_FLP_F	2022-01-29	414	0	0	0
896	895	Trp_Fru_FLP_F	2022-01-29	415	0	0.153846	0.153846
897	896	Trp_Fru_FLP_F	2022-01-29	416	0	0.576923	0.408272
898	897	Trp_Fru_FLP_F	2022-01-29	417	0	0.115385	0.0846154
899	898	Trp_Fru_FLP_F	2022-01-29	418	0	0.192308	0.136091
900	899	Trp_Fru_FLP_F	2022-01-29	419	0	0.269231	0.269231
901	900	Trp_Fru_FLP_F	2022-01-29	420	0	0.346154	0.346154
902	901	Trp_Fru_FLP_F	2022-01-29	421	0	0	0
903	902	Trp_Fru_FLP_F	2022-01-29	422	0	0	0
904	903	Trp_Fru_FLP_F	2022-01-29	423	0	0	0
905	904	Trp_Fru_FLP_F	2022-01-29	424	0	0	0
906	905	Trp_Fru_FLP_F	2022-01-29	425	0	0.0384615	0.0384615
907	906	Trp_Fru_FLP_F	2022-01-29	426	0	0.0769231	0.0769231
908	907	Trp_Fru_FLP_F	2022-01-29	427	0	0.115385	0.0846154
909	908	Trp_Fru_FLP_F	2022-01-29	428	0	1.34615	1.34615
910	909	Trp_Fru_FLP_F	2022-01-29	429	0	0.884615	0.711071
911	910	Trp_Fru_FLP_F	2022-01-29	430	0	0.0769231	0.0532939
912	911	Trp_Fru_FLP_F	2022-01-29	431	0	0	0
913	912	Trp_Fru_FLP_F	2022-01-29	432	0	0	0
914	913	Trp_Fru_FLP_F	2022-01-29	433	0	0	0
915	914	Trp_Fru_FLP_F	2022-01-29	434	0	0	0
916	915	Trp_Fru_FLP_F	2022-01-29	435	0	0.192308	0.192308
917	916	Trp_Fru_FLP_F	2022-01-29	436	0	0	0
918	917	Trp_Fru_FLP_F	2022-01-29	437	0	0	0
919	918	Trp_Fru_FLP_F	2022-01-29	438	0	0.153846	0.153846
920	919	Trp_Fru_FLP_F	2022-01-29	439	0	0.0769231	0.0532939
921	920	Trp_Fru_FLP_F	2022-01-29	440	0	0.0769231	0.0532939
922	921	Trp_Fru_FLP_F	2022-01-29	441	0	0	0
923	922	Trp_Fru_FLP_F	2022-01-29	442	0	0.423077	0.385
924	923	Trp_Fru_FLP_F	2022-01-29	443	0	0.0384615	0.0384615
925	924	Trp_Fru_FLP_F	2022-01-29	444	0	0.807692	0.565738
926	925	Trp_Fru_FLP_F	2022-01-29	445	0	0.269231	0.204245
927	926	Trp_Fru_FLP_F	2022-01-29	446	0	0.115385	0.115385
928	927	Trp_Fru_FLP_F	2022-01-29	447	0	0	0
929	928	Trp_Fru_FLP_F	2022-01-29	448	0	0.115385	0.115385
930	929	Trp_Fru_FLP_F	2022-01-29	449	0	0	0
931	930	Trp_Fru_FLP_F	2022-01-29	450	0	0.307692	0.233826
932	931	Trp_Fru_FLP_F	2022-01-29	451	0	0.0769231	0.0769231
933	932	Trp_Fru_FLP_F	2022-01-29	452	0	0.0384615	0.0384615
934	933	Trp_Fru_FLP_F	2022-01-29	453	0	0.0384615	0.0384615
935	934	Trp_Fru_FLP_F	2022-01-29	454	0	0.115385	0.0846154
936	935	Trp_Fru_FLP_F	2022-01-29	455	0	0	0
937	936	Trp_Fru_FLP_F	2022-01-29	456	0	0	0
938	937	Trp_Fru_FLP_F	2022-01-29	457	0	0	0
939	938	Trp_Fru_FLP_F	2022-01-29	458	0	0.153846	0.153846
940	939	Trp_Fru_FLP_F	2022-01-29	459	0	0	0
941	940	Trp_Fru_FLP_F	2022-01-29	460	0	0	0
942	941	Trp_Fru_FLP_F	2022-01-29	461	0	0.115385	0.115385
943	942	Trp_Fru_FLP_F	2022-01-29	462	0	0.115385	0.115385
944	943	Trp_Fru_FLP_F	2022-01-29	463	0	0.115385	0.115385
945	944	Trp_Fru_FLP_F	2022-01-29	464	0	0	0
946	945	Trp_Fru_FLP_F	2022-01-29	465	0	0	0
947	946	Trp_Fru_FLP_F	2022-01-29	466	0	0.0384615	0.0384615
948	947	Trp_Fru_FLP_F	2022-01-29	467	0	0	0
949	948	Trp_Fru_FLP_F	2022-01-29	468	0	0.0769231	0.0769231
950	949	Trp_Fru_FLP_F	2022-01-29	469	0	0	0
951	950	Trp_Fru_FLP_F	2022-01-29	470	0	0	0
952	951	Trp_Fru_FLP_F	2022-01-29	471	0	0.0769231	0.0532939
953	952	Trp_Fru_FLP_F	2022-01-29	472	0	0.115385	0.0846154
954	953	Trp_Fru_FLP_F	2022-01-29	473	0	0.0769231	0.0769231
955	954	Trp_Fru_FLP_F	2022-01-29	474	0	0.423077	0.242887
956	955	Trp_Fru_FLP_F	2022-01-29	475	0	0.730769	0.510076
957	956	Trp_Fru_FLP_F	2022-01-29	476	0	0.423077	0.294426
958	957	Trp_Fru_FLP_F	2022-01-29	477	0	0.576923	0.319486
959	958	Trp_Fru_FLP_F	2022-01-29	478	0	0.153846	0.0910166
960	959	Trp_Fru_FLP_F	2022-01-29	479	0	0.307692	0.220274
961	960	Trp_Fru_FLP_F	2022-01-29	480	0	1	0.7317
962	961	Trp_Fru_FLP_F	2022-01-29	481	0	0.346154	0.241421
963	962	Trp_Fru_FLP_F	2022-01-29	482	0	0.115385	0.115385
964	963	Trp_Fru_FLP_F	2022-01-29	483	0	0.384615	0.384615
965	964	Trp_Fru_FLP_F	2022-01-29	484	0	0.923077	0.748173
966	965	Trp_Fru_FLP_F	2022-01-29	485	0	0	0
967	966	Trp_Fru_FLP_F	2022-01-29	486	0	0	0
968	967	Trp_Fru_FLP_F	2022-01-29	487	0	0.384615	0.384615
969	968	Trp_Fru_FLP_F	2022-01-29	488	0	0.307692	0.240315
970	969	Trp_Fru_FLP_F	2022-01-29	489	0	0.0769231	0.0769231
971	970	Trp_Fru_FLP_F	2022-01-29	490	0	0.192308	0.111206
972	971	Trp_Fru_FLP_F	2022-01-29	491	0	0.0384615	0.0384615
973	972	Trp_Fru_FLP_F	2022-01-29	492	0	1.19231	1.11358
974	973	Trp_Fru_FLP_F	2022-01-29	493	0	0.807692	0.73174
975	974	Trp_Fru_FLP_F	2022-01-29	494	0	0.692308	0.379349
976	975	Trp_Fru_FLP_F	2022-01-29	495	0	0.384615	0.192769
977	976	Trp_Fru_FLP_F	2022-01-29	496	0	1.30769	0.905996
978	977	Trp_Fru_FLP_F	2022-01-29	497	0	0.269231	0.171488
979	978	Trp_Fru_FLP_F	2022-01-29	498	0	0.0769231	0.0532939
980	979	Trp_Fru_FLP_F	2022-01-29	499	0	0.0769231	0.0769231
981	980	Trp_Fru_FLP_F	2022-01-29	500	0	0.307692	0.14432
982	981	Trp_Fru_FLP_F	2022-01-29	501	0	0.461538	0.319763
983	982	Trp_Fru_FLP_F	2022-01-29	502	0	0.0769231	0.0769231
984	983	Trp_Fru_FLP_F	2022-01-29	503	0	0.153846	0.106588
985	984	Trp_Fru_FLP_F	2022-01-29	504	0	0.0769231	0.0532939
986	985	Trp_Fru_FLP_F	2022-01-29	505	0	0	0
987	986	Trp_Fru_FLP_F	2022-01-29	506	0	0.153846	0.106588
988	987	Trp_Fru_FLP_F	2022-01-29	507	0	0.115385	0.0846154
989	988	Trp_Fru_FLP_F	2022-01-29	508	0	0.0384615	0.0384615
990	989	Trp_Fru_FLP_F	2022-01-29	509	0	0	0
991	990	Trp_Fru_FLP_F	2022-01-29	510	0	0.0384615	0.0384615
992	991	Trp_Fru_FLP_F	2022-01-29	511	0	0.192308	0.124273
993	992	Trp_Fru_FLP_F	2022-01-29	512	0	0.307692	0.240315
994	993	Trp_Fru_FLP_F	2022-01-29	513	0	0.230769	0.127794
995	994	Trp_Fru_FLP_F	2022-01-29	514	0	0.307692	0.213175
996	995	Trp_Fru_FLP_F	2022-01-29	515	0	0.884615	0.600838
997	996	Trp_Fru_FLP_F	2022-01-29	516	0	0.615385	0.615385
998	997	Trp_Fru_FLP_F	2022-01-29	517	0	0.884615	0.711071
999	998	Trp_Fru_FLP_F	2022-01-29	518	0	0.307692	0.270437
1000	999	Trp_Fru_FLP_F	2022-01-29	519	0	0.653846	0.354931
1001	1000	Trp_Fru_FLP_F	2022-01-29	520	0	1	0.44028
1002	1001	Trp_Fru_FLP_F	2022-01-29	521	0	0.5	0.389279
1003	1002	Trp_Fru_FLP_F	2022-01-29	522	0	1.26923	1.19171
1004	1003	Trp_Fru_FLP_F	2022-01-29	523	0	0.153846	0.0910166
1005	1004	Trp_Fru_FLP_F	2022-01-29	524	0	0.461538	0.351834
1006	1005	Trp_Fru_FLP_F	2022-01-29	525	0	0.0384615	0.0384615
1007	1006	Trp_Fru_FLP_F	2022-01-29	526	0	0.576923	0.35593
1008	1007	Trp_Fru_FLP_F	2022-01-29	527	0	0.0384615	0.0384615
1009	1008	Trp_Fru_FLP_F	2022-01-29	528	0	0.230769	0.159882
1010	1009	Trp_Fru_FLP_F	2022-01-29	529	0	0.115385	0.0638971
1011	1010	Trp_Fru_FLP_F	2022-01-29	530	0	0.692308	0.653439
1012	1011	Trp_Fru_FLP_F	2022-01-29	531	0	0.384615	0.200591
1013	1012	Trp_Fru_FLP_F	2022-01-29	532	0	1.03846	0.455668
1014	1013	Trp_Fru_FLP_F	2022-01-29	533	0	1.15385	0.773985
1015	1014	Trp_Fru_FLP_F	2022-01-29	534	0	1.03846	0.352925
1016	1015	Trp_Fru_FLP_F	2022-01-29	535	0	0.538462	0.309991
1017	1016	Trp_Fru_FLP_F	2022-01-29	536	0	0.807692	0.61524
1018	1017	Trp_Fru_FLP_F	2022-01-29	537	0	0.269231	0.171488
1019	1018	Trp_Fru_FLP_F	2022-01-29	538	0	0.192308	0.0963843
1020	1019	Trp_Fru_FLP_F	2022-01-29	539	0	0.538462	0.249497
1021	1020	Trp_Fru_FLP_F	2022-01-29	540	0	1	0.921537
1022	1021	Trp_Fru_FLP_F	2022-01-29	541	0	0.615385	0.380594
1023	1022	Trp_Fru_FLP_F	2022-01-29	542	0	1.26923	0.997779
1024	1023	Trp_Fru_FLP_F	2022-01-29	543	0	1.15385	0.718315
1025	1024	Trp_Fru_FLP_F	2022-01-29	544	0	2.73077	2.15018
1026	1025	Trp_Fru_FLP_F	2022-01-29	545	0	0.846154	0.362438
1027	1026	Trp_Fru_FLP_F	2022-01-29	546	0	0.384615	0.208119
1028	1027	Trp_Fru_FLP_F	2022-01-29	547	0	1.5	1.08734
1029	1028	Trp_Fru_FLP_F	2022-01-29	548	0	1.92308	1.37888
1030	1029	Trp_Fru_FLP_F	2022-01-29	549	0	0.538462	0.267356
1031	1030	Trp_Fru_FLP_F	2022-01-29	550	0	0.346154	0.156326
1032	1031	Trp_Fru_FLP_F	2022-01-29	551	0	0.423077	0.176923
1033	1032	Trp_Fru_FLP_F	2022-01-29	552	0	0.384615	0.192769
1034	1033	Trp_Fru_FLP_F	2022-01-29	553	0	0.807692	0.30894
1035	1034	Trp_Fru_FLP_F	2022-01-29	554	0	0.5	0.223607
1036	1035	Trp_Fru_FLP_F	2022-01-29	555	0	0.807692	0.380361
1037	1036	Trp_Fru_FLP_F	2022-01-29	556	0	0.576923	0.223077
1038	1037	Trp_Fru_FLP_F	2022-01-29	557	0	0.807692	0.61524
1039	1038	Trp_Fru_FLP_F	2022-01-29	558	0	0.153846	0.120158
1040	1039	Trp_Fru_FLP_F	2022-01-29	559	0	0.230769	0.139314
1041	1040	Trp_Fru_FLP_F	2022-01-29	560	0	0.461538	0.223474
1042	1041	Trp_Fru_FLP_F	2022-01-29	561	0	0.230769	0.100884
1043	1042	Trp_Fru_FLP_F	2022-01-29	562	0	0.807692	0.470742
1044	1043	Trp_Fru_FLP_F	2022-01-29	563	0	1.34615	1.22781
1045	1044	Trp_Fru_FLP_F	2022-01-29	564	0	0.115385	0.0638971
1046	1045	Trp_Fru_FLP_F	2022-01-29	565	0	0.653846	0.411161
1047	1046	Trp_Fru_FLP_F	2022-01-29	566	0	0.346154	0.18349
1048	1047	Trp_Fru_FLP_F	2022-01-29	567	0	0.769231	0.577282
1049	1048	Trp_Fru_FLP_F	2022-01-29	568	0	0.346154	0.123317
1050	1049	Trp_Fru_FLP_F	2022-01-29	569	0	0.923077	0.4959
1051	1050	Trp_Fru_FLP_F	2022-01-29	570	0	0.153846	0.0910166
1052	1051	Trp_Fru_FLP_F	2022-01-29	571	0	0.384615	0.16712
1053	1052	Trp_Fru_FLP_F	2022-01-29	572	0	0.576923	0.267024
1054	1053	Trp_Fru_FLP_F	2022-01-29	573	0	1.15385	0.456381
1055	1054	Trp_Fru_FLP_F	2022-01-29	574	0	0.307692	0.14432
1056	1055	Trp_Fru_FLP_F	2022-01-29	575	0	0.576923	0.242887
1057	1056	Trp_Fru_FLP_F	2022-01-29	576	0	0.846154	0.362438
1058	1057	Trp_Fru_FLP_F	2022-01-29	577	0	0.576923	0.21607
1059	1058	Trp_Fru_FLP_F	2022-01-29	578	0	0.5	0.201914
1060	1059	Trp_Fru_FLP_F	2022-01-29	579	0	0.961538	0.583044
1061	1060	Trp_Fru_FLP_F	2022-01-29	580	0	0.807692	0.303919
1062	1061	Trp_Fru_FLP_F	2022-01-29	581	0	0.769231	0.320133
1063	1062	Trp_Fru_FLP_F	2022-01-29	582	0	0.961538	0.472248
1064	1063	Trp_Fru_FLP_F	2022-01-29	583	0	0.461538	0.16853
1065	1064	Trp_Fru_FLP_F	2022-01-29	584	0	0.576923	0.242887
1066	1065	Trp_Fru_FLP_F	2022-01-29	585	0	0.5	0.351918
1067	1066	Trp_Fru_FLP_F	2022-01-29	586	0	0.923077	0.450378
1068	1067	Trp_Fru_FLP_F	2022-01-29	587	0	0.846154	0.264239
1069	1068	Trp_Fru_FLP_F	2022-01-29	588	0	0.692308	0.281585
1070	1069	Trp_Fru_FLP_F	2022-01-29	589	0	0.884615	0.28997
1071	1070	Trp_Fru_FLP_F	2022-01-29	590	0.5	1.38462	0.433508
1072	1071	Trp_Fru_FLP_F	2022-01-29	591	0	0.846154	0.281164
1073	1072	Trp_Fru_FLP_F	2022-01-29	592	0	0.730769	0.263455
1074	1073	Trp_Fru_FLP_F	2022-01-29	593	0	0.769231	0.256051
1075	1074	Trp_Fru_FLP_F	2022-01-29	594	1.5	2.53846	0.944996
1076	1075	Trp_Fru_FLP_F	2022-01-29	595	0	1.07692	0.379972
1077	1076	Trp_Fru_FLP_F	2022-01-29	596	0	1.42308	0.529653
1078	1077	Trp_Fru_FLP_F	2022-01-29	597	1	0.807692	0.17558
1079	1078	Trp_Fru_FLP_F	2022-01-29	598	0	0.884615	0.273591
1080	1079	Trp_Fru_FLP_F	2022-01-29	599	1	1.26923	0.482167
1081	1080	Trp_Fru_FLP_F	2022-01-29	600	1	1.96154	0.640867
1082	1081	Trp_Fru_FLP_F	2022-01-29	601	1	1.34615	0.35057
1083	1082	Trp_Fru_FLP_F	2022-01-29	602	0.5	1.07692	0.26558
1084	1083	Trp_Fru_FLP_F	2022-01-29	603	0	0.846154	0.258352
1085	1084	Trp_Fru_FLP_F	2022-01-29	604	1	1.26923	0.28586
1086	1085	Trp_Fru_FLP_F	2022-01-29	605	1	0.730769	0.171488
1087	1086	Trp_Fru_FLP_F	2022-01-29	606	1	0.807692	0.184134
1088	1087	Trp_Fru_FLP_F	2022-01-29	607	0	1.30769	0.513717
1089	1088	Trp_Fru_FLP_F	2022-01-29	608	1.5	1.73077	0.402139
1090	1089	Trp_Fru_FLP_F	2022-01-29	609	1	0.961538	0.238462
1091	1090	Trp_Fru_FLP_F	2022-01-29	610	0	0.923077	0.259722
1092	1091	Trp_Fru_FLP_F	2022-01-29	611	1	2.61538	1.70707
1093	1092	Trp_Fru_FLP_F	2022-01-29	612	0	0.807692	0.235465
1094	1093	Trp_Fru_FLP_F	2022-01-29	613	1	2.38462	1.02594
1095	1094	Trp_Fru_FLP_F	2022-01-29	614	1	1	0.214834
1096	1095	Trp_Fru_FLP_F	2022-01-29	615	0.5	0.807692	0.192308
1097	1096	Trp_Fru_FLP_F	2022-01-29	616	1	0.923077	0.276923
1098	1097	Trp_Fru_FLP_F	2022-01-29	617	1	1.76923	0.512333
1099	1098	Trp_Fru_FLP_F	2022-01-29	618	1	1.11538	0.230897
1100	1099	Trp_Fru_FLP_F	2022-01-29	619	1	1.11538	0.237467
1101	1100	Trp_Fru_FLP_F	2022-01-29	620	1	2.26923	1.12395
1102	1101	Trp_Fru_FLP_F	2022-01-29	621	1	1.30769	0.425239
1103	1102	Trp_Fru_FLP_F	2022-01-29	622	1	1.23077	0.194602
1104	1103	Trp_Fru_FLP_F	2022-01-29	623	1	1.19231	0.241911
1105	1104	Trp_Fru_FLP_F	2022-01-29	624	1	1.30769	0.270437
1106	1105	Trp_Fru_FLP_F	2022-01-29	625	1	1.61538	0.364066
1107	1106	Trp_Fru_FLP_F	2022-01-29	626	2	1.57692	0.304697
1108	1107	Trp_Fru_FLP_F	2022-01-29	627	1	1.92308	0.641928
1109	1108	Trp_Fru_FLP_F	2022-01-29	628	1	2.84615	0.976166
1110	1109	Trp_Fru_FLP_F	2022-01-29	629	1	0.923077	0.165697
1111	1110	Trp_Fru_FLP_F	2022-01-29	630	0.5	0.807692	0.248189
1112	1111	Trp_Fru_FLP_F	2022-01-29	631	1	0.923077	0.183329
1113	1112	Trp_Fru_FLP_F	2022-01-29	632	1	1.46154	0.261538
1114	1113	Trp_Fru_FLP_F	2022-01-29	633	1	1.38462	0.314163
1115	1114	Trp_Fru_FLP_F	2022-01-29	634	1	1.30769	0.322343
1116	1115	Trp_Fru_FLP_F	2022-01-29	635	0.5	0.730769	0.188579
1117	1116	Trp_Fru_FLP_F	2022-01-29	636	1	1.65385	0.327894
1118	1117	Trp_Fru_FLP_F	2022-01-29	637	1	1.34615	0.47049
1119	1118	Trp_Fru_FLP_F	2022-01-29	638	1	0.961538	0.244828
1120	1119	Trp_Fru_FLP_F	2022-01-29	639	1	1.15385	0.21262
1121	1120	Trp_Fru_FLP_F	2022-01-29	640	1	0.846154	0.153846
1122	1121	Trp_Fru_FLP_F	2022-01-29	641	1	1.30769	0.246634
1123	1122	Trp_Fru_FLP_F	2022-01-29	642	1.5	3.38462	1.64745
1124	1123	Trp_Fru_FLP_F	2022-01-29	643	1	1.19231	0.342027
1125	1124	Trp_Fru_FLP_F	2022-01-29	644	1	1.38462	0.260632
1126	1125	Trp_Fru_FLP_F	2022-01-29	645	1	1.42308	0.457999
1127	1126	Trp_Fru_FLP_F	2022-01-29	646	1	1.38462	0.266469
1128	1127	Trp_Fru_FLP_F	2022-01-29	647	1	1.42308	0.278309
1129	1128	Trp_Fru_FLP_F	2022-01-29	648	1	1.19231	0.235465
1130	1129	Trp_Fru_FLP_F	2022-01-29	649	1	1.19231	0.254312
1131	1130	Trp_Fru_FLP_F	2022-01-29	650	1	1.07692	0.134999
1132	1131	Trp_Fru_FLP_F	2022-01-29	651	1	1.34615	0.18349
1133	1132	Trp_Fru_FLP_F	2022-01-29	652	1	1.80769	0.350908
1134	1133	Trp_Fru_FLP_F	2022-01-29	653	1	1.19231	0.207692
1135	1134	Trp_Fru_FLP_F	2022-01-29	654	1	1.65385	0.436568
1136	1135	Trp_Fru_FLP_F	2022-01-29	655	1	1.19231	0.298814
1137	1136	Trp_Fru_FLP_F	2022-01-29	656	1	1.61538	0.422727
1138	1137	Trp_Fru_FLP_F	2022-01-29	657	1	1.34615	0.367705
1139	1138	Trp_Fru_FLP_F	2022-01-29	658	1	1.73077	0.321332
1140	1139	Trp_Fru_FLP_F	2022-01-29	659	1	1.80769	0.342027
1141	1140	Trp_Fru_FLP_F	2022-01-29	660	1	1.15385	0.233319
1142	1141	Trp_Fru_FLP_F	2022-01-29	661	1	0.846154	0.181382
1143	1142	Trp_Fru_FLP_F	2022-01-29	662	1	1.42308	0.21607
1144	1143	Trp_Fru_FLP_F	2022-01-29	663	1	1.11538	0.186687
1145	1144	Trp_Fru_FLP_F	2022-01-29	664	1	1.53846	0.309991
1146	1145	Trp_Fru_FLP_F	2022-01-29	665	1	1.92308	0.460512
1147	1146	Trp_Fru_FLP_F	2022-01-29	666	1	1.61538	0.222413
1148	1147	Trp_Fru_FLP_F	2022-01-29	667	1	1.19231	0.184134
1149	1148	Trp_Fru_FLP_F	2022-01-29	668	1	1.46154	0.177424
1150	1149	Trp_Fru_FLP_F	2022-01-29	669	1	1.34615	0.4802
1151	1150	Trp_Fru_FLP_F	2022-01-29	670	1	1.42308	0.22987
1152	1151	Trp_Fru_FLP_F	2022-01-29	671	1	2.30769	0.995017
1153	1152	Trp_Fru_FLP_F	2022-01-29	672	1	3.61538	2.22923
1154	1153	Trp_Fru_FLP_F	2022-01-29	673	1	1.34615	0.207122
1155	1154	Trp_Fru_FLP_F	2022-01-29	674	1	2.03846	0.420552
1156	1155	Trp_Fru_FLP_F	2022-01-29	675	2	2	0.328165
1157	1156	Trp_Fru_FLP_F	2022-01-29	676	1	1.07692	0.183329
1158	1157	Trp_Fru_FLP_F	2022-01-29	677	1	1.26923	0.196568
1159	1158	Trp_Fru_FLP_F	2022-01-29	678	1	1.65385	0.313503
1160	1159	Trp_Fru_FLP_F	2022-01-29	679	1	1.53846	0.230256
1161	1160	Trp_Fru_FLP_F	2022-01-29	680	1	1.38462	0.208119
1162	1161	Trp_Fru_FLP_F	2022-01-29	681	1	2.30769	0.772148
1163	1162	Trp_Fru_FLP_F	2022-01-29	682	1	1.5	0.230384
1164	1163	Trp_Fru_FLP_F	2022-01-29	683	1	1.53846	0.261538
1165	1164	Trp_Fru_FLP_F	2022-01-29	684	2	1.92308	0.247592
1166	1165	Trp_Fru_FLP_F	2022-01-29	685	2	1.80769	0.254312
1167	1166	Trp_Fru_FLP_F	2022-01-29	686	2	1.88462	0.397403
1168	1167	Trp_Fru_FLP_F	2022-01-29	687	2	1.76923	0.267798
1169	1168	Trp_Fru_FLP_F	2022-01-29	688	2	1.61538	0.254661
1170	1169	Trp_Fru_FLP_F	2022-01-29	689	1	1.26923	0.204245
1171	1170	Trp_Fru_FLP_F	2022-01-29	690	2	2.26923	0.321332
1172	1171	Trp_Fru_FLP_F	2022-01-29	691	1	1.11538	0.160067
1173	1172	Trp_Fru_FLP_F	2022-01-29	692	1	1.5	0.338549
1174	1173	Trp_Fru_FLP_F	2022-01-29	693	1	1.11538	0.217163
1175	1174	Trp_Fru_FLP_F	2022-01-29	694	1	1.53846	0.338462
1176	1175	Trp_Fru_FLP_F	2022-01-29	695	1	1.42308	0.360227
1177	1176	Trp_Fru_FLP_F	2022-01-29	696	0.5	1.84615	0.747699
1178	1177	Trp_Fru_FLP_F	2022-01-29	697	0	0.884615	0.300394
1179	1178	Trp_Fru_FLP_F	2022-01-29	698	0	0.615385	0.184615
1180	1179	Trp_Fru_FLP_F	2022-01-29	699	1	1.15385	0.286584
1181	1180	Trp_Fru_FLP_F	2022-01-29	700	0	0.576923	0.176923
1182	1181	Trp_Fru_FLP_F	2022-01-29	701	0	0.538462	0.209253
1183	1182	Trp_Fru_FLP_F	2022-01-29	702	0	0.538462	0.216481
1184	1183	Trp_Fru_FLP_F	2022-01-29	703	0	0.846154	0.336005
1185	1184	Trp_Fru_FLP_F	2022-01-29	704	0	0.730769	0.280427
1186	1185	Trp_Fru_FLP_F	2022-01-29	705	0	1.07692	0.418507
1187	1186	Trp_Fru_FLP_F	2022-01-29	706	0	0.615385	0.208119
1188	1187	Trp_Fru_FLP_F	2022-01-29	707	0	0.692308	0.258809
1189	1188	Trp_Fru_FLP_F	2022-01-29	708	0	0.769231	0.224003
1190	1189	Trp_Fru_FLP_F	2022-01-29	709	0	1	0.323443
1191	1190	Trp_Fru_FLP_F	2022-01-29	710	0	0.807692	0.271855
1192	1191	Trp_Fru_FLP_F	2022-01-29	711	0	0.461538	0.15914
1193	1192	Trp_Fru_FLP_F	2022-01-29	712	0	0.461538	0.223474
1194	1193	Trp_Fru_FLP_F	2022-01-29	713	0	0.807692	0.303919
1195	1194	Trp_Fru_FLP_F	2022-01-29	714	0	1.03846	0.564272
1196	1195	Trp_Fru_FLP_F	2022-01-29	715	0	0.653846	0.30353
1197	1196	Trp_Fru_FLP_F	2022-01-29	716	0	0.576923	0.185415
1198	1197	Trp_Fru_FLP_F	2022-01-29	717	0	0.5	0.216617
1199	1198	Trp_Fru_FLP_F	2022-01-29	718	0	0.269231	0.118422
1200	1199	Trp_Fru_FLP_F	2022-01-29	719	0	0.423077	0.158581
1201	1200	Trp_Fru_FLP_F	2022-01-29	720	0	1.26923	0.53366
1202	1201	Trp_Fru_FLP_F	2022-01-29	721	0	0.769231	0.320133
1203	1202	Trp_Fru_FLP_F	2022-01-29	722	0	0.730769	0.326085
1204	1203	Trp_Fru_FLP_F	2022-01-29	723	0	0.961538	0.280004
1205	1204	Trp_Fru_FLP_F	2022-01-29	724	0	0.730769	0.335388
1206	1205	Trp_Fru_FLP_F	2022-01-29	725	0	0.615385	0.288641
1207	1206	Trp_Fru_FLP_F	2022-01-29	726	0	0.230769	0.100884
1208	1207	Trp_Fru_FLP_F	2022-01-29	727	0	0.576923	0.294426
1209	1208	Trp_Fru_FLP_F	2022-01-29	728	0	0.230769	0.159882
1210	1209	Trp_Fru_FLP_F	2022-01-29	729	0	0.307692	0.154613
1211	1210	Trp_Fru_FLP_F	2022-01-29	730	0	0.730769	0.34444
1212	1211	Trp_Fru_FLP_F	2022-01-29	731	0	0.346154	0.156326
1213	1212	Trp_Fru_FLP_F	2022-01-29	732	0	0.538462	0.329245
1214	1213	Trp_Fru_FLP_F	2022-01-29	733	0	0.807692	0.260291
1215	1214	Trp_Fru_FLP_F	2022-01-29	734	0	0.615385	0.293923
1216	1215	Trp_Fru_FLP_F	2022-01-29	735	0	0.692308	0.302651
1217	1216	Trp_Fru_FLP_F	2022-01-29	736	0	0.730769	0.306633
1218	1217	Trp_Fru_FLP_F	2022-01-29	737	0	0.384615	0.157645
1219	1218	Trp_Fru_FLP_F	2022-01-29	738	0	0.769231	0.284511
1220	1219	Trp_Fru_FLP_F	2022-01-29	739	0	1.11538	0.41631
1221	1220	Trp_Fru_FLP_F	2022-01-29	740	0	0.653846	0.241421
1222	1221	Trp_Fru_FLP_F	2022-01-29	741	0	1.5	1.03812
1223	1222	Trp_Fru_FLP_F	2022-01-29	742	0	1.42308	0.68427
1224	1223	Trp_Fru_FLP_F	2022-01-29	743	0	0.346154	0.18349
1225	1224	Trp_Fru_FLP_F	2022-01-29	744	0	0.346154	0.174905
1226	1225	Trp_Fru_FLP_F	2022-01-29	745	0	0.653846	0.247711
1227	1226	Trp_Fru_FLP_F	2022-01-29	746	0	0.807692	0.277457
1228	1227	Trp_Fru_FLP_F	2022-01-29	747	0	0.576923	0.278309
1229	1228	Trp_Fru_FLP_F	2022-01-29	748	0	0.230769	0.127794
1230	1229	Trp_Fru_FLP_F	2022-01-29	749	0	0.307692	0.133235
1231	1230	Trp_Fru_FLP_F	2022-01-29	750	0	0.192308	0.111206
1232	1231	Trp_Fru_FLP_F	2022-01-29	751	0	0.153846	0.120158
1233	1232	Trp_Fru_FLP_F	2022-01-29	752	0	0.346154	0.22148
1234	1233	Trp_Fru_FLP_F	2022-01-29	753	0	0.769231	0.305376
1235	1234	Trp_Fru_FLP_F	2022-01-29	754	0	0.615385	0.538022
1236	1235	Trp_Fru_FLP_F	2022-01-29	755	0	1.23077	0.997393
1237	1236	Trp_Fru_FLP_F	2022-01-29	756	0	0.5	0.223607
1238	1237	Trp_Fru_FLP_F	2022-01-29	757	0	0.961538	0.427806
1239	1238	Trp_Fru_FLP_F	2022-01-29	758	0	0.307692	0.164263
1240	1239	Trp_Fru_FLP_F	2022-01-29	759	0	0.538462	0.329245
1241	1240	Trp_Fru_FLP_F	2022-01-29	760	0	0.192308	0.192308
1242	1241	Trp_Fru_FLP_F	2022-01-29	761	0	0.153846	0.120158
1243	1242	Trp_Fru_FLP_F	2022-01-29	762	0	0.423077	0.324265
1244	1243	Trp_Fru_FLP_F	2022-01-29	763	0	0.153846	0.120158
1245	1244	Trp_Fru_FLP_F	2022-01-29	764	0	0.115385	0.0846154
1246	1245	Trp_Fru_FLP_F	2022-01-29	765	0	0.230769	0.115128
1247	1246	Trp_Fru_FLP_F	2022-01-29	766	0	0.346154	0.156326
1248	1247	Trp_Fru_FLP_F	2022-01-29	767	0	0.653846	0.392006
1249	1248	Trp_Fru_FLP_F	2022-01-29	768	0	0.153846	0.0721602
1250	1249	Trp_Fru_FLP_F	2022-01-29	769	0	0.461538	0.27305
1251	1250	Trp_Fru_FLP_F	2022-01-29	770	0	0.615385	0.372422
1252	1251	Trp_Fru_FLP_F	2022-01-29	771	0	0.115385	0.0846154
1253	1252	Trp_Fru_FLP_F	2022-01-29	772	0	0.461538	0.261538
1254	1253	Trp_Fru_FLP_F	2022-01-29	773	0	0.192308	0.124273
1255	1254	Trp_Fru_FLP_F	2022-01-29	774	0	0.423077	0.249141
1256	1255	Trp_Fru_FLP_F	2022-01-29	775	0	0.346154	0.18349
1257	1256	Trp_Fru_FLP_F	2022-01-29	776	0	0.884615	0.590507
1258	1257	Trp_Fru_FLP_F	2022-01-29	777	0	0.384615	0.222413
1259	1258	Trp_Fru_FLP_F	2022-01-29	778	0	0.269231	0.130769
1260	1259	Trp_Fru_FLP_F	2022-01-29	779	0	0.153846	0.0910166
1261	1260	Trp_Fru_FLP_F	2022-01-29	780	0	0.846154	0.501359
1262	1261	Trp_Fru_FLP_F	2022-01-29	781	0	0.0769231	0.0532939
1263	1262	Trp_Fru_FLP_F	2022-01-29	782	0	0.0384615	0.0384615
1264	1263	Trp_Fru_FLP_F	2022-01-29	783	0	0.230769	0.100884
1265	1264	Trp_Fru_FLP_F	2022-01-29	784	0	0.5	0.315009
1266	1265	Trp_Fru_FLP_F	2022-01-29	785	0	0.346154	0.174905
1267	1266	Trp_Fru_FLP_F	2022-01-29	786	0	0.0384615	0.0384615
1268	1267	Trp_Fru_FLP_F	2022-01-29	787	0	0.423077	0.314633
1269	1268	Trp_Fru_FLP_F	2022-01-29	788	0	0.769231	0.434326
1270	1269	Trp_Fru_FLP_F	2022-01-29	789	0	0.115385	0.0846154
1271	1270	Trp_Fru_FLP_F	2022-01-29	790	0	0.346154	0.207122
1272	1271	Trp_Fru_FLP_F	2022-01-29	791	0	0.192308	0.157081
1273	1272	Trp_Fru_FLP_F	2022-01-29	792	0	0.192308	0.124273
1274	1273	Trp_Fru_FLP_F	2022-01-29	793	0	1.19231	0.887554
1275	1274	Trp_Fru_FLP_F	2022-01-29	794	0	1.76923	1.42969
1276	1275	Trp_Fru_FLP_F	2022-01-29	795	0	0.307692	0.307692
1277	1276	Trp_Fru_FLP_F	2022-01-29	796	0	0.461538	0.255588
1278	1277	Trp_Fru_FLP_F	2022-01-29	797	0	0.192308	0.192308
1279	1278	Trp_Fru_FLP_F	2022-01-29	798	0	0.423077	0.347178
1280	1279	Trp_Fru_FLP_F	2022-01-29	799	0	0.115385	0.115385
1281	1280	Trp_Fru_FLP_F	2022-01-29	800	0	0.307692	0.198217
1282	1281	Trp_Fru_FLP_F	2022-01-29	801	0	0.730769	0.482167
1283	1282	Trp_Fru_FLP_F	2022-01-29	802	0	0.538462	0.499941
1284	1283	Trp_Fru_FLP_F	2022-01-29	803	0	0.307692	0.220274
1285	1284	Trp_Fru_FLP_F	2022-01-29	804	0	0.0384615	0.0384615
1286	1285	Trp_Fru_FLP_F	2022-01-29	805	0	0.115385	0.0846154
1287	1286	Trp_Fru_FLP_F	2022-01-29	806	0	0.153846	0.120158
1288	1287	Trp_Fru_FLP_F	2022-01-29	807	0	0.269231	0.23243
1289	1288	Trp_Fru_FLP_F	2022-01-29	808	0	0.115385	0.0846154
1290	1289	Trp_Fru_FLP_F	2022-01-29	809	0	0.307692	0.164263
1291	1290	Trp_Fru_FLP_F	2022-01-29	810	0	0.115385	0.0846154
1292	1291	Trp_Fru_FLP_F	2022-01-29	811	0	0.653846	0.298418
1293	1292	Trp_Fru_FLP_F	2022-01-29	812	0	0.884615	0.427252
1294	1293	Trp_Fru_FLP_F	2022-01-29	813	0	0.230769	0.169231
1295	1294	Trp_Fru_FLP_F	2022-01-29	814	0	0.692308	0.516703
1296	1295	Trp_Fru_FLP_F	2022-01-29	815	0	0.115385	0.115385
1297	1296	Trp_Fru_FLP_F	2022-01-29	816	0	0.269231	0.204245
1298	1297	Trp_Fru_FLP_F	2022-01-29	817	0	0.538462	0.304988
1299	1298	Trp_Fru_FLP_F	2022-01-29	818	0	0	0
1300	1299	Trp_Fru_FLP_F	2022-01-29	819	0	0.153846	0.153846
1301	1300	Trp_Fru_FLP_F	2022-01-29	820	0	0.615385	0.396434
1302	1301	Trp_Fru_FLP_F	2022-01-29	821	0	0.192308	0.157081
1303	1302	Trp_Fru_FLP_F	2022-01-29	822	0	0.346154	0.191691
1304	1303	Trp_Fru_FLP_F	2022-01-29	823	0	0.461538	0.236843
1305	1304	Trp_Fru_FLP_F	2022-01-29	824	0	0.0384615	0.0384615
1306	1305	Trp_Fru_FLP_F	2022-01-29	825	0	0.0384615	0.0384615
1307	1306	Trp_Fru_FLP_F	2022-01-29	826	0	1.07692	0.554487
1308	1307	Trp_Fru_FLP_F	2022-01-29	827	0	0.423077	0.324265
1309	1308	Trp_Fru_FLP_F	2022-01-29	828	0	0.384615	0.215385
1310	1309	Trp_Fru_FLP_F	2022-01-29	829	0	0.115385	0.0846154
1311	1310	Trp_Fru_FLP_F	2022-01-29	830	0	0.307692	0.270437
1312	1311	Trp_Fru_FLP_F	2022-01-29	831	0	0.230769	0.159882
1313	1312	Trp_Fru_FLP_F	2022-01-29	832	0	0.538462	0.426906
1314	1313	Trp_Fru_FLP_F	2022-01-29	833	0	1.15385	1.00566
1315	1314	Trp_Fru_FLP_F	2022-01-29	834	0	1.57692	1.13568
1316	1315	Trp_Fru_FLP_F	2022-01-29	835	0	0.0384615	0.0384615
1317	1316	Trp_Fru_FLP_F	2022-01-29	836	0	0.0384615	0.0384615
1318	1317	Trp_Fru_FLP_F	2022-01-29	837	0	0.5	0.423357
1319	1318	Trp_Fru_FLP_F	2022-01-29	838	0	0.461538	0.324539
1320	1319	Trp_Fru_FLP_F	2022-01-29	839	0	0.538462	0.46486
1321	1320	Trp_Fru_FLP_F	2022-01-29	840	0	0.5	0.294827
1322	1321	Trp_Fru_FLP_F	2022-01-29	841	0	0.423077	0.185415
1323	1322	Trp_Fru_FLP_F	2022-01-29	842	0	0.115385	0.115385
1324	1323	Trp_Fru_FLP_F	2022-01-29	843	0	0.346154	0.199556
1325	1324	Trp_Fru_FLP_F	2022-01-29	844	0	0.115385	0.115385
1326	1325	Trp_Fru_FLP_F	2022-01-29	845	0	0.307692	0.270437
1327	1326	Trp_Fru_FLP_F	2022-01-29	846	0	0.0769231	0.0532939
1328	1327	Trp_Fru_FLP_F	2022-01-29	847	0	0.461538	0.28946
1329	1328	Trp_Fru_FLP_F	2022-01-29	848	0	0.0769231	0.0532939
1330	1329	Trp_Fru_FLP_F	2022-01-29	849	0	0.0384615	0.0384615
1331	1330	Trp_Fru_FLP_F	2022-01-29	850	0	0.423077	0.347178
1332	1331	Trp_Fru_FLP_F	2022-01-29	851	0	0.461538	0.294727
1333	1332	Trp_Fru_FLP_F	2022-01-29	852	0	0.192308	0.111206
1334	1333	Trp_Fru_FLP_F	2022-01-29	853	0	0.423077	0.278309
1335	1334	Trp_Fru_FLP_F	2022-01-29	854	0	0.423077	0.347178
1336	1335	Trp_Fru_FLP_F	2022-01-29	855	0	0.384615	0.242277
1337	1336	Trp_Fru_FLP_F	2022-01-29	856	0	0.653846	0.411161
1338	1337	Trp_Fru_FLP_F	2022-01-29	857	0	0.807692	0.464159
1339	1338	Trp_Fru_FLP_F	2022-01-29	858	0	0.653846	0.653846
1340	1339	Trp_Fru_FLP_F	2022-01-29	859	0	0.269231	0.269231
1341	1340	Trp_Fru_FLP_F	2022-01-29	860	0	0.153846	0.106588
1342	1341	Trp_Fru_FLP_F	2022-01-29	861	0	0.423077	0.314633
1343	1342	Trp_Fru_FLP_F	2022-01-29	862	0	0.846154	0.456381
1344	1343	Trp_Fru_FLP_F	2022-01-29	863	0	0.5	0.267467
1345	1344	Trp_Fru_FLP_F	2022-01-29	864	0	0.730769	0.370271
1346	1345	Trp_Fru_FLP_F	2022-01-29	865	0	0.423077	0.185415
1347	1346	Trp_Fru_FLP_F	2022-01-29	866	0	0.769231	0.320133
1348	1347	Trp_Fru_FLP_F	2022-01-29	867	0	0.5	0.294827
1349	1348	Trp_Fru_FLP_F	2022-01-29	868	0	1	0.367946
1350	1349	Trp_Fru_FLP_F	2022-01-29	869	0	0.423077	0.309705
1351	1350	Trp_Fru_FLP_F	2022-01-29	870	0	0.653846	0.346154
1352	1351	Trp_Fru_FLP_F	2022-01-29	871	0	0.423077	0.289153
1353	1352	Trp_Fru_FLP_F	2022-01-29	872	0	0.192308	0.111206
1354	1353	Trp_Fru_FLP_F	2022-01-29	873	0	0.0769231	0.0769231
1355	1354	Trp_Fru_FLP_F	2022-01-29	874	0	0.230769	0.139314
1356	1355	Trp_Fru_FLP_F	2022-01-29	875	0	0.730769	0.655293
1357	1356	Trp_Fru_FLP_F	2022-01-29	876	0	0.0384615	0.0384615
1358	1357	Trp_Fru_FLP_F	2022-01-29	877	0	0.192308	0.111206
1359	1358	Trp_Fru_FLP_F	2022-01-29	878	0	0.807692	0.496199
1360	1359	Trp_Fru_FLP_F	2022-01-29	879	0	1.76923	1.53854
1361	1360	Trp_Fru_FLP_F	2022-01-29	880	0	0.5	0.305085
1362	1361	Trp_Fru_FLP_F	2022-01-29	881	0	0	0
1363	1362	Trp_Fru_FLP_F	2022-01-29	882	0	0.0384615	0.0384615
1364	1363	Trp_Fru_FLP_F	2022-01-29	883	0	0.576923	0.364473
1365	1364	Trp_Fru_FLP_F	2022-01-29	884	0	0.0769231	0.0532939
1366	1365	Trp_Fru_FLP_F	2022-01-29	885	0	0.269231	0.204245
1367	1366	Trp_Fru_FLP_F	2022-01-29	886	0	0.615385	0.47093
1368	1367	Trp_Fru_FLP_F	2022-01-29	887	0	0.307692	0.173376
1369	1368	Trp_Fru_FLP_F	2022-01-29	888	0	0.615385	0.337762
1370	1369	Trp_Fru_FLP_F	2022-01-29	889	0	0.653846	0.422237
1371	1370	Trp_Fru_FLP_F	2022-01-29	890	0	0.307692	0.198217
1372	1371	Trp_Fru_FLP_F	2022-01-29	891	0	0.961538	0.682711
1373	1372	Trp_Fru_FLP_F	2022-01-29	892	0	0.192308	0.157081
1374	1373	Trp_Fru_FLP_F	2022-01-29	893	0	0.0769231	0.0532939
1375	1374	Trp_Fru_FLP_F	2022-01-29	894	0	0.461538	0.423287
1376	1375	Trp_Fru_FLP_F	2022-01-29	895	0	0.153846	0.106588
1377	1376	Trp_Fru_FLP_F	2022-01-29	896	0	0	0
1378	1377	Trp_Fru_FLP_F	2022-01-29	897	0	0.153846	0.120158
1379	1378	Trp_Fru_FLP_F	2022-01-29	898	0	0.0384615	0.0384615
1380	1379	Trp_Fru_FLP_F	2022-01-29	899	0	0	0
1381	1380	Trp_Fru_FLP_F	2022-01-29	900	0	0.153846	0.120158
1382	1381	Trp_Fru_FLP_F	2022-01-29	901	0	0.192308	0.136091
1383	1382	Trp_Fru_FLP_F	2022-01-29	902	0	0.115385	0.0846154
1384	1383	Trp_Fru_FLP_F	2022-01-29	903	0	0.0769231	0.0532939
1385	1384	Trp_Fru_FLP_F	2022-01-29	904	0	0.423077	0.385
1386	1385	Trp_Fru_FLP_F	2022-01-29	905	0	0.269231	0.23243
1387	1386	Trp_Fru_FLP_F	2022-01-29	906	0	0.0769231	0.0769231
1388	1387	Trp_Fru_FLP_F	2022-01-29	907	0	0.0384615	0.0384615
1389	1388	Trp_Fru_FLP_F	2022-01-29	908	0	0.538462	0.538462
1390	1389	Trp_Fru_FLP_F	2022-01-29	909	0	0.846154	0.731053
1391	1390	Trp_Fru_FLP_F	2022-01-29	910	0	0.615385	0.429944
1392	1391	Trp_Fru_FLP_F	2022-01-29	911	0	0.230769	0.194602
1393	1392	Trp_Fru_FLP_F	2022-01-29	912	0	0.423077	0.283783
1394	1393	Trp_Fru_FLP_F	2022-01-29	913	0	1.11538	0.732387
1395	1394	Trp_Fru_FLP_F	2022-01-29	914	0	0.346154	0.18349
1396	1395	Trp_Fru_FLP_F	2022-01-29	915	0	0.730769	0.34444
1397	1396	Trp_Fru_FLP_F	2022-01-29	916	0	0.692308	0.35418
1398	1397	Trp_Fru_FLP_F	2022-01-29	917	0	0.692308	0.391326
1399	1398	Trp_Fru_FLP_F	2022-01-29	918	0	0.346154	0.174905
1400	1399	Trp_Fru_FLP_F	2022-01-29	919	0	0.307692	0.154613
1401	1400	Trp_Fru_FLP_F	2022-01-29	920	0	0.307692	0.14432
1402	1401	Trp_Fru_FLP_F	2022-01-29	921	0	0.461538	0.261538
1403	1402	Trp_Fru_FLP_F	2022-01-29	922	0	0.615385	0.283261
1404	1403	Trp_Fru_FLP_F	2022-01-29	923	0	0.615385	0.46435
1405	1404	Trp_Fru_FLP_F	2022-01-29	924	0	0.384615	0.309227
1406	1405	Trp_Fru_FLP_F	2022-01-29	925	0	0.0769231	0.0532939
1407	1406	Trp_Fru_FLP_F	2022-01-29	926	0	0.5	0.267467
1408	1407	Trp_Fru_FLP_F	2022-01-29	927	0	0.423077	0.289153
1409	1408	Trp_Fru_FLP_F	2022-01-29	928	0	1.23077	0.769231
1410	1409	Trp_Fru_FLP_F	2022-01-29	929	0	0.5	0.389279
1411	1410	Trp_Fru_FLP_F	2022-01-29	930	0	0	0
1412	1411	Trp_Fru_FLP_F	2022-01-29	931	0	0.346154	0.18349
1413	1412	Trp_Fru_FLP_F	2022-01-29	932	0	1.30769	0.7601
1414	1413	Trp_Fru_FLP_F	2022-01-29	933	0	0.730769	0.616585
1415	1414	Trp_Fru_FLP_F	2022-01-29	934	0	0.0384615	0.0384615
1416	1415	Trp_Fru_FLP_F	2022-01-29	935	0	0.769231	0.478162
1417	1416	Trp_Fru_FLP_F	2022-01-29	936	0	0.461538	0.230256
1418	1417	Trp_Fru_FLP_F	2022-01-29	937	0	0.0769231	0.0532939
1419	1418	Trp_Fru_FLP_F	2022-01-29	938	0	0.153846	0.153846
1420	1419	Trp_Fru_FLP_F	2022-01-29	939	0	0.576923	0.333619
1421	1420	Trp_Fru_FLP_F	2022-01-29	940	0	0.692308	0.653439
1422	1421	Trp_Fru_FLP_F	2022-01-29	941	0	0.576923	0.351581
1423	1422	Trp_Fru_FLP_F	2022-01-29	942	0	0.0384615	0.0384615
1424	1423	Trp_Fru_FLP_F	2022-01-29	943	0	0.0769231	0.0769231
1425	1424	Trp_Fru_FLP_F	2022-01-29	944	0	0.115385	0.115385
1426	1425	Trp_Fru_FLP_F	2022-01-29	945	0	0.153846	0.153846
1427	1426	Trp_Fru_FLP_F	2022-01-29	946	0	0.384615	0.248546
1428	1427	Trp_Fru_FLP_F	2022-01-29	947	0	0.423077	0.267024
1429	1428	Trp_Fru_FLP_F	2022-01-29	948	0	0.346154	0.346154
1430	1429	Trp_Fru_FLP_F	2022-01-29	949	0	0.5	0.284199
1431	1430	Trp_Fru_FLP_F	2022-01-29	950	0	1.23077	1.11674
1432	1431	Trp_Fru_FLP_F	2022-01-29	951	0	0.346154	0.22148
1433	1432	Trp_Fru_FLP_F	2022-01-29	952	0	0.0769231	0.0769231
1434	1433	Trp_Fru_FLP_F	2022-01-29	953	0	0.884615	0.625919
1435	1434	Trp_Fru_FLP_F	2022-01-29	954	0	0.538462	0.243252
1436	1435	Trp_Fru_FLP_F	2022-01-29	955	0	0.192308	0.0963843
1437	1436	Trp_Fru_FLP_F	2022-01-29	956	0	0.346154	0.346154
1438	1437	Trp_Fru_FLP_F	2022-01-29	957	0	0.192308	0.111206
1439	1438	Trp_Fru_FLP_F	2022-01-29	958	0	0.576923	0.499763
1440	1439	Trp_Fru_FLP_F	2022-01-29	959	0	0.346154	0.241421
1441	0	Trp_Fru_FLP_F	2022-01-30	960	0	0.0384615	0.0384615
1442	1	Trp_Fru_FLP_F	2022-01-30	961	0	0.115385	0.0846154
1443	2	Trp_Fru_FLP_F	2022-01-30	962	0	0.423077	0.289153
1444	3	Trp_Fru_FLP_F	2022-01-30	963	0	0.576923	0.304697
1445	4	Trp_Fru_FLP_F	2022-01-30	964	0	0.0384615	0.0384615
1446	5	Trp_Fru_FLP_F	2022-01-30	965	0	0.269231	0.196568
1447	6	Trp_Fru_FLP_F	2022-01-30	966	0	0.461538	0.423287
1448	7	Trp_Fru_FLP_F	2022-01-30	967	0	0.307692	0.270437
1449	8	Trp_Fru_FLP_F	2022-01-30	968	0	0.346154	0.241421
1450	9	Trp_Fru_FLP_F	2022-01-30	969	0	0.0769231	0.0769231
1451	10	Trp_Fru_FLP_F	2022-01-30	970	0	0.115385	0.0846154
1452	11	Trp_Fru_FLP_F	2022-01-30	971	0	0.230769	0.230769
1453	12	Trp_Fru_FLP_F	2022-01-30	972	0	0.346154	0.27703
1454	13	Trp_Fru_FLP_F	2022-01-30	973	0	0.269231	0.152494
1455	14	Trp_Fru_FLP_F	2022-01-30	974	0	1.15385	0.596638
1456	15	Trp_Fru_FLP_F	2022-01-30	975	0	0.538462	0.329245
1457	16	Trp_Fru_FLP_F	2022-01-30	976	0	0.423077	0.185415
1458	17	Trp_Fru_FLP_F	2022-01-30	977	0	0.423077	0.236468
1459	18	Trp_Fru_FLP_F	2022-01-30	978	0	1.88462	1.49494
1460	19	Trp_Fru_FLP_F	2022-01-30	979	0	1.23077	0.825195
1461	20	Trp_Fru_FLP_F	2022-01-30	980	0	0.538462	0.304988
1462	21	Trp_Fru_FLP_F	2022-01-30	981	0	0.538462	0.299901
1463	22	Trp_Fru_FLP_F	2022-01-30	982	0	0.0769231	0.0532939
1464	23	Trp_Fru_FLP_F	2022-01-30	983	0	0.269231	0.118422
1465	24	Trp_Fru_FLP_F	2022-01-30	984	0	0.192308	0.124273
1466	25	Trp_Fru_FLP_F	2022-01-30	985	0	0.461538	0.324539
1467	26	Trp_Fru_FLP_F	2022-01-30	986	0	0.153846	0.120158
1468	27	Trp_Fru_FLP_F	2022-01-30	987	0	0.230769	0.115128
1469	28	Trp_Fru_FLP_F	2022-01-30	988	0	0.538462	0.267356
1470	29	Trp_Fru_FLP_F	2022-01-30	989	0	0.230769	0.159882
1471	30	Trp_Fru_FLP_F	2022-01-30	990	0	0.192308	0.136091
1472	31	Trp_Fru_FLP_F	2022-01-30	991	0	0.769231	0.490863
1473	32	Trp_Fru_FLP_F	2022-01-30	992	0	0.230769	0.159882
1474	33	Trp_Fru_FLP_F	2022-01-30	993	0	0.538462	0.329245
1475	34	Trp_Fru_FLP_F	2022-01-30	994	0	0.307692	0.173376
1476	35	Trp_Fru_FLP_F	2022-01-30	995	0	0.269231	0.188579
1477	36	Trp_Fru_FLP_F	2022-01-30	996	0	0.115385	0.0638971
1478	37	Trp_Fru_FLP_F	2022-01-30	997	0	0.576923	0.289153
1479	38	Trp_Fru_FLP_F	2022-01-30	998	0	0.230769	0.139314
1480	39	Trp_Fru_FLP_F	2022-01-30	999	0	0.192308	0.0963843
1481	40	Trp_Fru_FLP_F	2022-01-30	1000	0	0.269231	0.196568
1482	41	Trp_Fru_FLP_F	2022-01-30	1001	0	0.192308	0.0963843
1483	42	Trp_Fru_FLP_F	2022-01-30	1002	0	0.307692	0.213175
1484	43	Trp_Fru_FLP_F	2022-01-30	1003	0	0.384615	0.242277
1485	44	Trp_Fru_FLP_F	2022-01-30	1004	0	0.153846	0.106588
1486	45	Trp_Fru_FLP_F	2022-01-30	1005	0	0.961538	0.675917
1487	46	Trp_Fru_FLP_F	2022-01-30	1006	0	1	0.746273
1488	47	Trp_Fru_FLP_F	2022-01-30	1007	0	0.384615	0.184615
1489	48	Trp_Fru_FLP_F	2022-01-30	1008	0	0.192308	0.192308
1490	49	Trp_Fru_FLP_F	2022-01-30	1009	0	0.115385	0.115385
1491	50	Trp_Fru_FLP_F	2022-01-30	1010	0	0.5	0.356263
1492	51	Trp_Fru_FLP_F	2022-01-30	1011	0	0.269231	0.142048
1493	52	Trp_Fru_FLP_F	2022-01-30	1012	0	0.538462	0.393136
1494	53	Trp_Fru_FLP_F	2022-01-30	1013	0	0.307692	0.205832
1495	54	Trp_Fru_FLP_F	2022-01-30	1014	0	0.692308	0.492308
1496	55	Trp_Fru_FLP_F	2022-01-30	1015	0	0.576923	0.430288
1497	56	Trp_Fru_FLP_F	2022-01-30	1016	0	0.0384615	0.0384615
1498	57	Trp_Fru_FLP_F	2022-01-30	1017	0	0	0
1499	58	Trp_Fru_FLP_F	2022-01-30	1018	0	0.423077	0.242887
1500	59	Trp_Fru_FLP_F	2022-01-30	1019	0	0.692308	0.399111
1501	60	Trp_Fru_FLP_F	2022-01-30	1020	0	0.346154	0.191691
1502	61	Trp_Fru_FLP_F	2022-01-30	1021	0	0.5	0.351918
1503	62	Trp_Fru_FLP_F	2022-01-30	1022	0	0.961538	0.536314
1504	63	Trp_Fru_FLP_F	2022-01-30	1023	0	0.692308	0.331752
1505	64	Trp_Fru_FLP_F	2022-01-30	1024	0	0	0
1506	65	Trp_Fru_FLP_F	2022-01-30	1025	0	0.730769	0.583247
1507	66	Trp_Fru_FLP_F	2022-01-30	1026	0	0.692308	0.55406
1508	67	Trp_Fru_FLP_F	2022-01-30	1027	0	0.153846	0.120158
1509	68	Trp_Fru_FLP_F	2022-01-30	1028	0	0.346154	0.27703
1510	69	Trp_Fru_FLP_F	2022-01-30	1029	0	0.384615	0.184615
1511	70	Trp_Fru_FLP_F	2022-01-30	1030	0	0.538462	0.329245
1512	71	Trp_Fru_FLP_F	2022-01-30	1031	0	1	0.688365
1513	72	Trp_Fru_FLP_F	2022-01-30	1032	0	0.923077	0.375901
1514	73	Trp_Fru_FLP_F	2022-01-30	1033	0	0.461538	0.193993
1515	74	Trp_Fru_FLP_F	2022-01-30	1034	0	0.769231	0.381526
1516	75	Trp_Fru_FLP_F	2022-01-30	1035	0	0.5	0.284199
1517	76	Trp_Fru_FLP_F	2022-01-30	1036	0	0.576923	0.314633
1518	77	Trp_Fru_FLP_F	2022-01-30	1037	0	0.692308	0.362764
1519	78	Trp_Fru_FLP_F	2022-01-30	1038	0	0.769231	0.300296
1520	79	Trp_Fru_FLP_F	2022-01-30	1039	0	0.576923	0.236468
1521	80	Trp_Fru_FLP_F	2022-01-30	1040	0	0.538462	0.304988
1522	81	Trp_Fru_FLP_F	2022-01-30	1041	0	0.115385	0.0846154
1523	82	Trp_Fru_FLP_F	2022-01-30	1042	0	0.0384615	0.0384615
1524	83	Trp_Fru_FLP_F	2022-01-30	1043	0	0.192308	0.111206
1525	84	Trp_Fru_FLP_F	2022-01-30	1044	0	0.423077	0.255241
1526	85	Trp_Fru_FLP_F	2022-01-30	1045	0	1.03846	0.734807
1527	86	Trp_Fru_FLP_F	2022-01-30	1046	0	0.807692	0.508449
1528	87	Trp_Fru_FLP_F	2022-01-30	1047	0	0.269231	0.171488
1529	88	Trp_Fru_FLP_F	2022-01-30	1048	0	0.5	0.273158
1530	89	Trp_Fru_FLP_F	2022-01-30	1049	0	0.461538	0.236843
1531	90	Trp_Fru_FLP_F	2022-01-30	1050	0	0.692308	0.362764
1532	91	Trp_Fru_FLP_F	2022-01-30	1051	0	1.23077	0.673242
1533	92	Trp_Fru_FLP_F	2022-01-30	1052	0	0.230769	0.139314
1534	93	Trp_Fru_FLP_F	2022-01-30	1053	0	0.461538	0.243252
1535	94	Trp_Fru_FLP_F	2022-01-30	1054	0	0.807692	0.470742
1536	95	Trp_Fru_FLP_F	2022-01-30	1055	0	1.11538	0.852737
1537	96	Trp_Fru_FLP_F	2022-01-30	1056	0	0.576923	0.289153
1538	97	Trp_Fru_FLP_F	2022-01-30	1057	0	0.230769	0.194602
1539	98	Trp_Fru_FLP_F	2022-01-30	1058	0	0.115385	0.0846154
1540	99	Trp_Fru_FLP_F	2022-01-30	1059	0	0.192308	0.111206
1541	100	Trp_Fru_FLP_F	2022-01-30	1060	0	0.230769	0.159882
1542	101	Trp_Fru_FLP_F	2022-01-30	1061	0	0.692308	0.539998
1543	102	Trp_Fru_FLP_F	2022-01-30	1062	0	0.5	0.305085
1544	103	Trp_Fru_FLP_F	2022-01-30	1063	0	0.192308	0.111206
1545	104	Trp_Fru_FLP_F	2022-01-30	1064	0	0.192308	0.111206
1546	105	Trp_Fru_FLP_F	2022-01-30	1065	0	0.538462	0.389203
1547	106	Trp_Fru_FLP_F	2022-01-30	1066	0	0.769231	0.481369
1548	107	Trp_Fru_FLP_F	2022-01-30	1067	0	0.269231	0.196568
1549	108	Trp_Fru_FLP_F	2022-01-30	1068	0	0.230769	0.230769
1550	109	Trp_Fru_FLP_F	2022-01-30	1069	0	0.846154	0.522398
1551	110	Trp_Fru_FLP_F	2022-01-30	1070	0	0.884615	0.451755
1552	111	Trp_Fru_FLP_F	2022-01-30	1071	0	0.230769	0.159882
1553	112	Trp_Fru_FLP_F	2022-01-30	1072	0	0.538462	0.338462
1554	113	Trp_Fru_FLP_F	2022-01-30	1073	0	0.576923	0.388975
1555	114	Trp_Fru_FLP_F	2022-01-30	1074	0	0.346154	0.191691
1556	115	Trp_Fru_FLP_F	2022-01-30	1075	0	0.5	0.216617
1557	116	Trp_Fru_FLP_F	2022-01-30	1076	0	0.461538	0.28946
1558	117	Trp_Fru_FLP_F	2022-01-30	1077	0	0.192308	0.124273
1559	118	Trp_Fru_FLP_F	2022-01-30	1078	0	1.5	1.2307
1560	119	Trp_Fru_FLP_F	2022-01-30	1079	0	0.0769231	0.0532939
1561	120	Trp_Fru_FLP_F	2022-01-30	1080	0	0.307692	0.173376
1562	121	Trp_Fru_FLP_F	2022-01-30	1081	0	0.115385	0.0846154
1563	122	Trp_Fru_FLP_F	2022-01-30	1082	0	0.307692	0.205832
1564	123	Trp_Fru_FLP_F	2022-01-30	1083	0	1.80769	1.07706
1565	124	Trp_Fru_FLP_F	2022-01-30	1084	0	1.92308	1.32308
1566	125	Trp_Fru_FLP_F	2022-01-30	1085	0	2.07692	1.84468
1567	126	Trp_Fru_FLP_F	2022-01-30	1086	0	0.884615	0.535873
1568	127	Trp_Fru_FLP_F	2022-01-30	1087	0	0.230769	0.194602
1569	128	Trp_Fru_FLP_F	2022-01-30	1088	0	0.0769231	0.0769231
1570	129	Trp_Fru_FLP_F	2022-01-30	1089	0	0.269231	0.188579
1571	130	Trp_Fru_FLP_F	2022-01-30	1090	0	0	0
1572	131	Trp_Fru_FLP_F	2022-01-30	1091	0	1.26923	1.26923
1573	132	Trp_Fru_FLP_F	2022-01-30	1092	0	0.615385	0.37653
1574	133	Trp_Fru_FLP_F	2022-01-30	1093	0	0.384615	0.314163
1575	134	Trp_Fru_FLP_F	2022-01-30	1094	0	0.153846	0.0910166
1576	135	Trp_Fru_FLP_F	2022-01-30	1095	0	0.115385	0.115385
1577	136	Trp_Fru_FLP_F	2022-01-30	1096	0	0.346154	0.346154
1578	137	Trp_Fru_FLP_F	2022-01-30	1097	0	0.0769231	0.0769231
1579	138	Trp_Fru_FLP_F	2022-01-30	1098	0	0.307692	0.182033
1580	139	Trp_Fru_FLP_F	2022-01-30	1099	0	0.115385	0.0846154
1581	140	Trp_Fru_FLP_F	2022-01-30	1100	0	0.230769	0.159882
1582	141	Trp_Fru_FLP_F	2022-01-30	1101	0	0.5	0.230384
1583	142	Trp_Fru_FLP_F	2022-01-30	1102	0	0.576923	0.319486
1584	143	Trp_Fru_FLP_F	2022-01-30	1103	0	0.0384615	0.0384615
1585	144	Trp_Fru_FLP_F	2022-01-30	1104	0	0.230769	0.169231
1586	145	Trp_Fru_FLP_F	2022-01-30	1105	0	0.423077	0.385
1587	146	Trp_Fru_FLP_F	2022-01-30	1106	0	0.192308	0.124273
1588	147	Trp_Fru_FLP_F	2022-01-30	1107	0	0.153846	0.0910166
1589	148	Trp_Fru_FLP_F	2022-01-30	1108	0	0.384615	0.314163
1590	149	Trp_Fru_FLP_F	2022-01-30	1109	0	1.19231	1.15295
1591	150	Trp_Fru_FLP_F	2022-01-30	1110	0	0.730769	0.730769
1592	151	Trp_Fru_FLP_F	2022-01-30	1111	0	0.153846	0.0910166
1593	152	Trp_Fru_FLP_F	2022-01-30	1112	0	0.192308	0.136091
1594	153	Trp_Fru_FLP_F	2022-01-30	1113	0	0	0
1595	154	Trp_Fru_FLP_F	2022-01-30	1114	0	0.115385	0.0846154
1596	155	Trp_Fru_FLP_F	2022-01-30	1115	0	0.346154	0.241421
1597	156	Trp_Fru_FLP_F	2022-01-30	1116	0	0.115385	0.0846154
1598	157	Trp_Fru_FLP_F	2022-01-30	1117	0	0.846154	0.281164
1599	158	Trp_Fru_FLP_F	2022-01-30	1118	0	0.615385	0.328525
1600	159	Trp_Fru_FLP_F	2022-01-30	1119	0	0.884615	0.389583
1601	160	Trp_Fru_FLP_F	2022-01-30	1120	0	0.923077	0.446949
1602	161	Trp_Fru_FLP_F	2022-01-30	1121	0	1.30769	0.665107
1603	162	Trp_Fru_FLP_F	2022-01-30	1122	0	0.461538	0.28946
1604	163	Trp_Fru_FLP_F	2022-01-30	1123	0	0.346154	0.308556
1605	164	Trp_Fru_FLP_F	2022-01-30	1124	0	0.0769231	0.0532939
1606	165	Trp_Fru_FLP_F	2022-01-30	1125	0	0.153846	0.106588
1607	166	Trp_Fru_FLP_F	2022-01-30	1126	0	0.115385	0.0638971
1608	167	Trp_Fru_FLP_F	2022-01-30	1127	0	0.192308	0.157081
1609	168	Trp_Fru_FLP_F	2022-01-30	1128	0	0.153846	0.120158
1610	169	Trp_Fru_FLP_F	2022-01-30	1129	0	0.961538	0.773565
1611	170	Trp_Fru_FLP_F	2022-01-30	1130	0	0.115385	0.0846154
1612	171	Trp_Fru_FLP_F	2022-01-30	1131	0	0.461538	0.249497
1613	172	Trp_Fru_FLP_F	2022-01-30	1132	0	0.576923	0.499763
1614	173	Trp_Fru_FLP_F	2022-01-30	1133	0	0.230769	0.194602
1615	174	Trp_Fru_FLP_F	2022-01-30	1134	0	0.153846	0.120158
1616	175	Trp_Fru_FLP_F	2022-01-30	1135	0	0.115385	0.115385
1617	176	Trp_Fru_FLP_F	2022-01-30	1136	0	0.0384615	0.0384615
1618	177	Trp_Fru_FLP_F	2022-01-30	1137	0	0.153846	0.0910166
1619	178	Trp_Fru_FLP_F	2022-01-30	1138	0	0.115385	0.115385
1620	179	Trp_Fru_FLP_F	2022-01-30	1139	0	0.0769231	0.0769231
1621	180	Trp_Fru_FLP_F	2022-01-30	1140	0	0.0384615	0.0384615
1622	181	Trp_Fru_FLP_F	2022-01-30	1141	0	0.192308	0.136091
1623	182	Trp_Fru_FLP_F	2022-01-30	1142	0	0.269231	0.162269
1624	183	Trp_Fru_FLP_F	2022-01-30	1143	0	0.115385	0.0846154
1625	184	Trp_Fru_FLP_F	2022-01-30	1144	0	0.653846	0.47049
1626	185	Trp_Fru_FLP_F	2022-01-30	1145	0	0.0769231	0.0532939
1627	186	Trp_Fru_FLP_F	2022-01-30	1146	0	0.192308	0.192308
1628	187	Trp_Fru_FLP_F	2022-01-30	1147	0	0.230769	0.169231
1629	188	Trp_Fru_FLP_F	2022-01-30	1148	0	0.230769	0.169231
1630	189	Trp_Fru_FLP_F	2022-01-30	1149	0	1.73077	1.04889
1631	190	Trp_Fru_FLP_F	2022-01-30	1150	0	2.57692	1.79758
1632	191	Trp_Fru_FLP_F	2022-01-30	1151	0	0.153846	0.153846
1633	192	Trp_Fru_FLP_F	2022-01-30	1152	0	0.307692	0.205832
1634	193	Trp_Fru_FLP_F	2022-01-30	1153	0	0.115385	0.115385
1635	194	Trp_Fru_FLP_F	2022-01-30	1154	0	1.03846	0.720002
1636	195	Trp_Fru_FLP_F	2022-01-30	1155	0	0.115385	0.0846154
1637	196	Trp_Fru_FLP_F	2022-01-30	1156	0	0.307692	0.240315
1638	197	Trp_Fru_FLP_F	2022-01-30	1157	0	0.153846	0.120158
1639	198	Trp_Fru_FLP_F	2022-01-30	1158	0	0.0769231	0.0769231
1640	199	Trp_Fru_FLP_F	2022-01-30	1159	0	0.0384615	0.0384615
1641	200	Trp_Fru_FLP_F	2022-01-30	1160	0	0.269231	0.196568
1642	201	Trp_Fru_FLP_F	2022-01-30	1161	0	0.538462	0.267356
1643	202	Trp_Fru_FLP_F	2022-01-30	1162	0	0.846154	0.472936
1644	203	Trp_Fru_FLP_F	2022-01-30	1163	0	0.423077	0.278309
1645	204	Trp_Fru_FLP_F	2022-01-30	1164	0	0.192308	0.124273
1646	205	Trp_Fru_FLP_F	2022-01-30	1165	0	0.192308	0.0788227
1647	206	Trp_Fru_FLP_F	2022-01-30	1166	0	0.192308	0.111206
1648	207	Trp_Fru_FLP_F	2022-01-30	1167	0	0.423077	0.249141
1649	208	Trp_Fru_FLP_F	2022-01-30	1168	0	0.269231	0.204245
1650	209	Trp_Fru_FLP_F	2022-01-30	1169	0	0.576923	0.464669
1651	210	Trp_Fru_FLP_F	2022-01-30	1170	0	0.461538	0.294727
1652	211	Trp_Fru_FLP_F	2022-01-30	1171	0	0.384615	0.222413
1653	212	Trp_Fru_FLP_F	2022-01-30	1172	0	1.26923	0.671526
1654	213	Trp_Fru_FLP_F	2022-01-30	1173	0	1.19231	0.710404
1655	214	Trp_Fru_FLP_F	2022-01-30	1174	0	0.153846	0.0910166
1656	215	Trp_Fru_FLP_F	2022-01-30	1175	0	1.34615	0.632315
1657	216	Trp_Fru_FLP_F	2022-01-30	1176	0	0.961538	0.640867
1658	217	Trp_Fru_FLP_F	2022-01-30	1177	0	0.346154	0.234962
1659	218	Trp_Fru_FLP_F	2022-01-30	1178	0	0.346154	0.199556
1660	219	Trp_Fru_FLP_F	2022-01-30	1179	0	0.0384615	0.0384615
1661	220	Trp_Fru_FLP_F	2022-01-30	1180	0	0.5	0.461603
1662	221	Trp_Fru_FLP_F	2022-01-30	1181	0	0.192308	0.136091
1663	222	Trp_Fru_FLP_F	2022-01-30	1182	0	0.5	0.278733
1664	223	Trp_Fru_FLP_F	2022-01-30	1183	0	0.307692	0.182033
1665	224	Trp_Fru_FLP_F	2022-01-30	1184	0	1.15385	1.03729
1666	225	Trp_Fru_FLP_F	2022-01-30	1185	0	0.269231	0.152494
1667	226	Trp_Fru_FLP_F	2022-01-30	1186	0	0.346154	0.241421
1668	227	Trp_Fru_FLP_F	2022-01-30	1187	0	0.230769	0.194602
1669	228	Trp_Fru_FLP_F	2022-01-30	1188	0	0.192308	0.136091
1670	229	Trp_Fru_FLP_F	2022-01-30	1189	0	1.34615	0.97656
1671	230	Trp_Fru_FLP_F	2022-01-30	1190	0	1.34615	1.30672
1672	231	Trp_Fru_FLP_F	2022-01-30	1191	0	1.26923	0.938997
1673	232	Trp_Fru_FLP_F	2022-01-30	1192	0	1	0.68388
1674	233	Trp_Fru_FLP_F	2022-01-30	1193	0	0.192308	0.124273
1675	234	Trp_Fru_FLP_F	2022-01-30	1194	0	0.538462	0.389203
1676	235	Trp_Fru_FLP_F	2022-01-30	1195	0	0.884615	0.444892
1677	236	Trp_Fru_FLP_F	2022-01-30	1196	0	0.653846	0.502126
1678	237	Trp_Fru_FLP_F	2022-01-30	1197	0	0.269231	0.171488
1679	238	Trp_Fru_FLP_F	2022-01-30	1198	0	0.192308	0.111206
1680	239	Trp_Fru_FLP_F	2022-01-30	1199	0	0.153846	0.0721602
1681	240	Trp_Fru_FLP_F	2022-01-30	1200	0	1.03846	0.709237
1682	241	Trp_Fru_FLP_F	2022-01-30	1201	0	0.807692	0.499289
1683	242	Trp_Fru_FLP_F	2022-01-30	1202	0	0.230769	0.127794
1684	243	Trp_Fru_FLP_F	2022-01-30	1203	0	0.384615	0.215385
1685	244	Trp_Fru_FLP_F	2022-01-30	1204	0	0.5	0.5
1686	245	Trp_Fru_FLP_F	2022-01-30	1205	0	0.230769	0.139314
1687	246	Trp_Fru_FLP_F	2022-01-30	1206	0	0.346154	0.191691
1688	247	Trp_Fru_FLP_F	2022-01-30	1207	0	0.192308	0.157081
1689	248	Trp_Fru_FLP_F	2022-01-30	1208	0	0.269231	0.188579
1690	249	Trp_Fru_FLP_F	2022-01-30	1209	0	0	0
1691	250	Trp_Fru_FLP_F	2022-01-30	1210	0	0.384615	0.242277
1692	251	Trp_Fru_FLP_F	2022-01-30	1211	0	0.961538	0.648028
1693	252	Trp_Fru_FLP_F	2022-01-30	1212	0	0.807692	0.511466
1694	253	Trp_Fru_FLP_F	2022-01-30	1213	0	0.346154	0.18349
1695	254	Trp_Fru_FLP_F	2022-01-30	1214	0	1.69231	1.14458
1696	255	Trp_Fru_FLP_F	2022-01-30	1215	0	0.653846	0.313503
1697	256	Trp_Fru_FLP_F	2022-01-30	1216	0	2.07692	1.22402
1698	257	Trp_Fru_FLP_F	2022-01-30	1217	0	1.88462	1.38933
1699	258	Trp_Fru_FLP_F	2022-01-30	1218	0	0.307692	0.154613
1700	259	Trp_Fru_FLP_F	2022-01-30	1219	0	0.153846	0.0910166
1701	260	Trp_Fru_FLP_F	2022-01-30	1220	0	0.615385	0.37653
1702	261	Trp_Fru_FLP_F	2022-01-30	1221	0	0.423077	0.201327
1703	262	Trp_Fru_FLP_F	2022-01-30	1222	0	0.192308	0.0963843
1704	263	Trp_Fru_FLP_F	2022-01-30	1223	0	0.346154	0.174905
1705	264	Trp_Fru_FLP_F	2022-01-30	1224	0	0.423077	0.176923
1706	265	Trp_Fru_FLP_F	2022-01-30	1225	0	0.576923	0.223077
1707	266	Trp_Fru_FLP_F	2022-01-30	1226	0	0.115385	0.0638971
1708	267	Trp_Fru_FLP_F	2022-01-30	1227	0	0.423077	0.278309
1709	268	Trp_Fru_FLP_F	2022-01-30	1228	0	1.07692	0.792121
1710	269	Trp_Fru_FLP_F	2022-01-30	1229	0	0.423077	0.22987
1711	270	Trp_Fru_FLP_F	2022-01-30	1230	0	0.461538	0.389203
1712	271	Trp_Fru_FLP_F	2022-01-30	1231	0	0.423077	0.201327
1713	272	Trp_Fru_FLP_F	2022-01-30	1232	0	1	0.473936
1714	273	Trp_Fru_FLP_F	2022-01-30	1233	0	1.03846	0.494526
1715	274	Trp_Fru_FLP_F	2022-01-30	1234	0	0.192308	0.0963843
1716	275	Trp_Fru_FLP_F	2022-01-30	1235	0	0.307692	0.164263
1717	276	Trp_Fru_FLP_F	2022-01-30	1236	0	0.615385	0.342286
1718	277	Trp_Fru_FLP_F	2022-01-30	1237	0	0.5	0.261652
1719	278	Trp_Fru_FLP_F	2022-01-30	1238	0	0.384615	0.157645
1720	279	Trp_Fru_FLP_F	2022-01-30	1239	0	0.5	0.315009
1721	280	Trp_Fru_FLP_F	2022-01-30	1240	0	1.46154	0.925254
1722	281	Trp_Fru_FLP_F	2022-01-30	1241	0	0.615385	0.319022
1723	282	Trp_Fru_FLP_F	2022-01-30	1242	0	0.730769	0.269231
1724	283	Trp_Fru_FLP_F	2022-01-30	1243	0	0.384615	0.157645
1725	284	Trp_Fru_FLP_F	2022-01-30	1244	0	0.0769231	0.0532939
1726	285	Trp_Fru_FLP_F	2022-01-30	1245	0	0.384615	0.346752
1727	286	Trp_Fru_FLP_F	2022-01-30	1246	0	0.730769	0.34444
1728	287	Trp_Fru_FLP_F	2022-01-30	1247	0	1.15385	0.84797
1729	288	Trp_Fru_FLP_F	2022-01-30	1248	0	0.230769	0.139314
1730	289	Trp_Fru_FLP_F	2022-01-30	1249	0	0.461538	0.309991
1731	290	Trp_Fru_FLP_F	2022-01-30	1250	0	1.19231	0.610219
1732	291	Trp_Fru_FLP_F	2022-01-30	1251	0	1	0.56022
1733	292	Trp_Fru_FLP_F	2022-01-30	1252	0	2.65385	1.06546
1734	293	Trp_Fru_FLP_F	2022-01-30	1253	0	0.846154	0.353846
1735	294	Trp_Fru_FLP_F	2022-01-30	1254	0	0.884615	0.360883
1736	295	Trp_Fru_FLP_F	2022-01-30	1255	0	1.30769	0.607059
1737	296	Trp_Fru_FLP_F	2022-01-30	1256	0	0.5	0.32463
1738	297	Trp_Fru_FLP_F	2022-01-30	1257	0	0.384615	0.208119
1739	298	Trp_Fru_FLP_F	2022-01-30	1258	0	0.653846	0.395911
1740	299	Trp_Fru_FLP_F	2022-01-30	1259	0	0.5	0.223607
1741	300	Trp_Fru_FLP_F	2022-01-30	1260	0	0.884615	0.356595
1742	301	Trp_Fru_FLP_F	2022-01-30	1261	0	0.423077	0.193535
1743	302	Trp_Fru_FLP_F	2022-01-30	1262	0	0.5	0.230384
1744	303	Trp_Fru_FLP_F	2022-01-30	1263	0	0.807692	0.277457
1745	304	Trp_Fru_FLP_F	2022-01-30	1264	0	1.07692	0.4365
1746	305	Trp_Fru_FLP_F	2022-01-30	1265	0	0.730769	0.35326
1747	306	Trp_Fru_FLP_F	2022-01-30	1266	0	0.653846	0.282529
1748	307	Trp_Fru_FLP_F	2022-01-30	1267	0	0.692308	0.220274
1749	308	Trp_Fru_FLP_F	2022-01-30	1268	0	0.615385	0.426351
1750	309	Trp_Fru_FLP_F	2022-01-30	1269	0	0.5	0.249615
1751	310	Trp_Fru_FLP_F	2022-01-30	1270	0	0.307692	0.190297
1752	311	Trp_Fru_FLP_F	2022-01-30	1271	0	0.923077	0.592058
1753	312	Trp_Fru_FLP_F	2022-01-30	1272	0	2.26923	1.20071
1754	313	Trp_Fru_FLP_F	2022-01-30	1273	0	1.53846	1.04988
1755	314	Trp_Fru_FLP_F	2022-01-30	1274	0	0.961538	0.431387
1756	315	Trp_Fru_FLP_F	2022-01-30	1275	0	0.384615	0.208119
1757	316	Trp_Fru_FLP_F	2022-01-30	1276	0	0.5	0.261652
1758	317	Trp_Fru_FLP_F	2022-01-30	1277	0	0.192308	0.0788227
1759	318	Trp_Fru_FLP_F	2022-01-30	1278	0	0.346154	0.27142
1760	319	Trp_Fru_FLP_F	2022-01-30	1279	0	0.384615	0.200591
1761	320	Trp_Fru_FLP_F	2022-01-30	1280	0	0.115385	0.0846154
1762	321	Trp_Fru_FLP_F	2022-01-30	1281	0	0.846154	0.731053
1763	322	Trp_Fru_FLP_F	2022-01-30	1282	0	0.538462	0.46486
1764	323	Trp_Fru_FLP_F	2022-01-30	1283	0	0.538462	0.255588
1765	324	Trp_Fru_FLP_F	2022-01-30	1284	0	0.0769231	0.0532939
1766	325	Trp_Fru_FLP_F	2022-01-30	1285	0	0.384615	0.200591
1767	326	Trp_Fru_FLP_F	2022-01-30	1286	0	0.153846	0.120158
1768	327	Trp_Fru_FLP_F	2022-01-30	1287	0	0.615385	0.277776
1769	328	Trp_Fru_FLP_F	2022-01-30	1288	0	0.5	0.243374
1770	329	Trp_Fru_FLP_F	2022-01-30	1289	0	0.192308	0.0963843
1771	330	Trp_Fru_FLP_F	2022-01-30	1290	0	0.730769	0.366092
1772	331	Trp_Fru_FLP_F	2022-01-30	1291	0	1.34615	0.897762
1773	332	Trp_Fru_FLP_F	2022-01-30	1292	0	0.576923	0.249141
1774	333	Trp_Fru_FLP_F	2022-01-30	1293	0	1.03846	0.596092
1775	334	Trp_Fru_FLP_F	2022-01-30	1294	0	0.615385	0.215385
1776	335	Trp_Fru_FLP_F	2022-01-30	1295	0	0.692308	0.307692
1777	336	Trp_Fru_FLP_F	2022-01-30	1296	0	0.269231	0.204245
1778	337	Trp_Fru_FLP_F	2022-01-30	1297	0	0.884615	0.41631
1779	338	Trp_Fru_FLP_F	2022-01-30	1298	0	0.384615	0.176085
1780	339	Trp_Fru_FLP_F	2022-01-30	1299	0	0.653846	0.323168
1781	340	Trp_Fru_FLP_F	2022-01-30	1300	0	0.846154	0.358168
1782	341	Trp_Fru_FLP_F	2022-01-30	1301	0	0.423077	0.223077
1783	342	Trp_Fru_FLP_F	2022-01-30	1302	0	0.423077	0.242887
1784	343	Trp_Fru_FLP_F	2022-01-30	1303	0	0.538462	0.230256
1785	344	Trp_Fru_FLP_F	2022-01-30	1304	0	0.730769	0.339944
1786	345	Trp_Fru_FLP_F	2022-01-30	1305	0	0.730769	0.301574
1787	346	Trp_Fru_FLP_F	2022-01-30	1306	0	0.576923	0.21607
1788	347	Trp_Fru_FLP_F	2022-01-30	1307	0	0.461538	0.177424
1789	348	Trp_Fru_FLP_F	2022-01-30	1308	0	1.34615	1.07552
1790	349	Trp_Fru_FLP_F	2022-01-30	1309	0	0.538462	0.267356
1791	350	Trp_Fru_FLP_F	2022-01-30	1310	0	0.384615	0.254661
1792	351	Trp_Fru_FLP_F	2022-01-30	1311	0	0.307692	0.154613
1793	352	Trp_Fru_FLP_F	2022-01-30	1312	0	0.0769231	0.0532939
1794	353	Trp_Fru_FLP_F	2022-01-30	1313	0	0.307692	0.14432
1795	354	Trp_Fru_FLP_F	2022-01-30	1314	0	0.0769231	0.0769231
1796	355	Trp_Fru_FLP_F	2022-01-30	1315	0	0.307692	0.107692
1797	356	Trp_Fru_FLP_F	2022-01-30	1316	0	0.5	0.32463
1798	357	Trp_Fru_FLP_F	2022-01-30	1317	0	0.576923	0.278309
1799	358	Trp_Fru_FLP_F	2022-01-30	1318	0	0.115385	0.0638971
1800	359	Trp_Fru_FLP_F	2022-01-30	1319	0	0.384615	0.254661
1801	360	Trp_Fru_FLP_F	2022-01-30	1320	0	0.423077	0.168003
1802	361	Trp_Fru_FLP_F	2022-01-30	1321	0	0.461538	0.201767
1803	362	Trp_Fru_FLP_F	2022-01-30	1322	0	0.230769	0.115128
1804	363	Trp_Fru_FLP_F	2022-01-30	1323	0	1.69231	1.1777
1805	364	Trp_Fru_FLP_F	2022-01-30	1324	0	1.65385	1.25385
1806	365	Trp_Fru_FLP_F	2022-01-30	1325	0	1.34615	0.646749
1807	366	Trp_Fru_FLP_F	2022-01-30	1326	0	0.269231	0.188579
1808	367	Trp_Fru_FLP_F	2022-01-30	1327	0	0.307692	0.182033
1809	368	Trp_Fru_FLP_F	2022-01-30	1328	0	0.307692	0.173376
1810	369	Trp_Fru_FLP_F	2022-01-30	1329	0	0.269231	0.204245
1811	370	Trp_Fru_FLP_F	2022-01-30	1330	0	0.230769	0.115128
1812	371	Trp_Fru_FLP_F	2022-01-30	1331	0	0.192308	0.0963843
1813	372	Trp_Fru_FLP_F	2022-01-30	1332	0	0.153846	0.0910166
1814	373	Trp_Fru_FLP_F	2022-01-30	1333	0	0.423077	0.255241
1815	374	Trp_Fru_FLP_F	2022-01-30	1334	0	0.5	0.201914
1816	375	Trp_Fru_FLP_F	2022-01-30	1335	0	2.34615	1.35072
1817	376	Trp_Fru_FLP_F	2022-01-30	1336	0	0.846154	0.428566
1818	377	Trp_Fru_FLP_F	2022-01-30	1337	0	0.5	0.230384
1819	378	Trp_Fru_FLP_F	2022-01-30	1338	0	0.192308	0.0963843
1820	379	Trp_Fru_FLP_F	2022-01-30	1339	0	0.961538	0.606328
1821	380	Trp_Fru_FLP_F	2022-01-30	1340	0	0.615385	0.328525
1822	381	Trp_Fru_FLP_F	2022-01-30	1341	0	0.0769231	0.0769231
1823	382	Trp_Fru_FLP_F	2022-01-30	1342	0	0.576923	0.388975
1824	383	Trp_Fru_FLP_F	2022-01-30	1343	0	0.423077	0.309705
1825	384	Trp_Fru_FLP_F	2022-01-30	1344	0	0.538462	0.278627
1826	385	Trp_Fru_FLP_F	2022-01-30	1345	0	0.423077	0.201327
1827	386	Trp_Fru_FLP_F	2022-01-30	1346	0	0.153846	0.0910166
1828	387	Trp_Fru_FLP_F	2022-01-30	1347	0	0.423077	0.158581
1829	388	Trp_Fru_FLP_F	2022-01-30	1348	0	0.269231	0.142048
1830	389	Trp_Fru_FLP_F	2022-01-30	1349	0	0.5	0.186052
1831	390	Trp_Fru_FLP_F	2022-01-30	1350	0	0.423077	0.242887
1832	391	Trp_Fru_FLP_F	2022-01-30	1351	0	0.307692	0.14432
1833	392	Trp_Fru_FLP_F	2022-01-30	1352	0	0.538462	0.230256
1834	393	Trp_Fru_FLP_F	2022-01-30	1353	0	0.807692	0.411449
1835	394	Trp_Fru_FLP_F	2022-01-30	1354	0	0.230769	0.115128
1836	395	Trp_Fru_FLP_F	2022-01-30	1355	0	0.961538	0.590907
1837	396	Trp_Fru_FLP_F	2022-01-30	1356	0	0.538462	0.201767
1838	397	Trp_Fru_FLP_F	2022-01-30	1357	0	0.269231	0.162269
1839	398	Trp_Fru_FLP_F	2022-01-30	1358	0	0.615385	0.304211
1840	399	Trp_Fru_FLP_F	2022-01-30	1359	0	0.346154	0.156326
1841	400	Trp_Fru_FLP_F	2022-01-30	1360	0	0.538462	0.236843
1842	401	Trp_Fru_FLP_F	2022-01-30	1361	0	0.307692	0.121139
1843	402	Trp_Fru_FLP_F	2022-01-30	1362	0	0.692308	0.399111
1844	403	Trp_Fru_FLP_F	2022-01-30	1363	0	0.384615	0.16712
1845	404	Trp_Fru_FLP_F	2022-01-30	1364	0	0.461538	0.209253
1846	405	Trp_Fru_FLP_F	2022-01-30	1365	0	0.423077	0.314633
1847	406	Trp_Fru_FLP_F	2022-01-30	1366	0	0.423077	0.201327
1848	407	Trp_Fru_FLP_F	2022-01-30	1367	0	1.30769	0.89403
1849	408	Trp_Fru_FLP_F	2022-01-30	1368	0	0.307692	0.198217
1850	409	Trp_Fru_FLP_F	2022-01-30	1369	0	0.576923	0.21607
1851	410	Trp_Fru_FLP_F	2022-01-30	1370	0	0.5	0.186052
1852	411	Trp_Fru_FLP_F	2022-01-30	1371	0	0.730769	0.263455
1853	412	Trp_Fru_FLP_F	2022-01-30	1372	0	1.03846	0.344096
1854	413	Trp_Fru_FLP_F	2022-01-30	1373	0	1.03846	0.263005
1855	414	Trp_Fru_FLP_F	2022-01-30	1374	0	1.03846	0.306247
1856	415	Trp_Fru_FLP_F	2022-01-30	1375	0	0.576923	0.176923
1857	416	Trp_Fru_FLP_F	2022-01-30	1376	0	0.769231	0.356512
1858	417	Trp_Fru_FLP_F	2022-01-30	1377	0	0.884615	0.262103
1859	418	Trp_Fru_FLP_F	2022-01-30	1378	0	0.615385	0.200591
1860	419	Trp_Fru_FLP_F	2022-01-30	1379	0.5	1.34615	0.367705
1861	420	Trp_Fru_FLP_F	2022-01-30	1380	0	0.884615	0.343408
1862	421	Trp_Fru_FLP_F	2022-01-30	1381	0	0.384615	0.200591
1863	422	Trp_Fru_FLP_F	2022-01-30	1382	0	0.538462	0.230256
1864	423	Trp_Fru_FLP_F	2022-01-30	1383	0	0.153846	0.106588
1865	424	Trp_Fru_FLP_F	2022-01-30	1384	0	0.423077	0.201327
1866	425	Trp_Fru_FLP_F	2022-01-30	1385	0	0.384615	0.176085
1867	426	Trp_Fru_FLP_F	2022-01-30	1386	0	0.615385	0.235842
1868	427	Trp_Fru_FLP_F	2022-01-30	1387	0	0.307692	0.133235
1869	428	Trp_Fru_FLP_F	2022-01-30	1388	0	0.846154	0.692137
1870	429	Trp_Fru_FLP_F	2022-01-30	1389	0	0.269231	0.142048
1871	430	Trp_Fru_FLP_F	2022-01-30	1390	0	0.269231	0.142048
1872	431	Trp_Fru_FLP_F	2022-01-30	1391	0	0.384615	0.229226
1873	432	Trp_Fru_FLP_F	2022-01-30	1392	0	0.307692	0.164263
1874	433	Trp_Fru_FLP_F	2022-01-30	1393	0	0.269231	0.204245
1875	434	Trp_Fru_FLP_F	2022-01-30	1394	0	0.384615	0.222413
1876	435	Trp_Fru_FLP_F	2022-01-30	1395	0	0.307692	0.133235
1877	436	Trp_Fru_FLP_F	2022-01-30	1396	0	0.423077	0.272725
1878	437	Trp_Fru_FLP_F	2022-01-30	1397	0	0.192308	0.124273
1879	438	Trp_Fru_FLP_F	2022-01-30	1398	0	0.923077	0.46384
1880	439	Trp_Fru_FLP_F	2022-01-30	1399	0	0.807692	0.464159
1881	440	Trp_Fru_FLP_F	2022-01-30	1400	0	0.192308	0.124273
1882	441	Trp_Fru_FLP_F	2022-01-30	1401	0	0.615385	0.260632
1883	442	Trp_Fru_FLP_F	2022-01-30	1402	0	0.769231	0.256051
1884	443	Trp_Fru_FLP_F	2022-01-30	1403	1	1.96154	0.675917
1885	444	Trp_Fru_FLP_F	2022-01-30	1404	1	1.61538	0.552134
1886	445	Trp_Fru_FLP_F	2022-01-30	1405	1	1.61538	0.380594
1887	446	Trp_Fru_FLP_F	2022-01-30	1406	2	1.92308	0.384
1888	447	Trp_Fru_FLP_F	2022-01-30	1407	2	2.38462	0.359816
1889	448	Trp_Fru_FLP_F	2022-01-30	1408	2	1.61538	0.254661
1890	449	Trp_Fru_FLP_F	2022-01-30	1409	2	2.03846	0.257089
1891	450	Trp_Fru_FLP_F	2022-01-30	1410	1	1.57692	0.267024
1892	451	Trp_Fru_FLP_F	2022-01-30	1411	3	2.57692	0.380983
1893	452	Trp_Fru_FLP_F	2022-01-30	1412	2	1.84615	0.291903
1894	453	Trp_Fru_FLP_F	2022-01-30	1413	1	1.26923	0.204245
1895	454	Trp_Fru_FLP_F	2022-01-30	1414	1.5	1.88462	0.373453
1896	455	Trp_Fru_FLP_F	2022-01-30	1415	1	1.34615	0.241421
1897	456	Trp_Fru_FLP_F	2022-01-30	1416	1	1.65385	0.313503
1898	457	Trp_Fru_FLP_F	2022-01-30	1417	1	1.88462	0.377551
1899	458	Trp_Fru_FLP_F	2022-01-30	1418	1	1.42308	0.201327
1900	459	Trp_Fru_FLP_F	2022-01-30	1419	1	1.34615	0.259836
1901	460	Trp_Fru_FLP_F	2022-01-30	1420	1	1.42308	0.185415
1902	461	Trp_Fru_FLP_F	2022-01-30	1421	1	2.5	0.635489
1903	462	Trp_Fru_FLP_F	2022-01-30	1422	1	3.15385	1.42688
1904	463	Trp_Fru_FLP_F	2022-01-30	1423	1	1.42308	0.22987
1905	464	Trp_Fru_FLP_F	2022-01-30	1424	1	2.26923	0.789465
1906	465	Trp_Fru_FLP_F	2022-01-30	1425	1	2.23077	0.423566
1907	466	Trp_Fru_FLP_F	2022-01-30	1426	1.5	1.84615	0.286584
1908	467	Trp_Fru_FLP_F	2022-01-30	1427	1.5	2.07692	0.741979
1909	468	Trp_Fru_FLP_F	2022-01-30	1428	1	1.34615	0.22148
1910	469	Trp_Fru_FLP_F	2022-01-30	1429	1	2.80769	1.10247
1911	470	Trp_Fru_FLP_F	2022-01-30	1430	1	1.61538	0.242277
1912	471	Trp_Fru_FLP_F	2022-01-30	1431	1	1.69231	0.428842
1913	472	Trp_Fru_FLP_F	2022-01-30	1432	1	1.5	0.267467
1914	473	Trp_Fru_FLP_F	2022-01-30	1433	1	1.07692	0.191537
1915	474	Trp_Fru_FLP_F	2022-01-30	1434	1	1.38462	0.333176
1916	475	Trp_Fru_FLP_F	2022-01-30	1435	1	0.961538	0.23192
1917	476	Trp_Fru_FLP_F	2022-01-30	1436	1	1.69231	0.469924
1918	477	Trp_Fru_FLP_F	2022-01-30	1437	1	1.15385	0.353846
1919	478	Trp_Fru_FLP_F	2022-01-30	1438	1	1.57692	0.364473
1920	479	Trp_Fru_FLP_F	2022-01-30	1439	1	1.61538	0.483821
1921	480	Trp_Fru_FLP_F	2022-01-30	0	2	2.19231	0.470742
1922	481	Trp_Fru_FLP_F	2022-01-30	1	0.5	1.19231	0.323534
1923	482	Trp_Fru_FLP_F	2022-01-30	2	1	1.38462	0.304211
1924	483	Trp_Fru_FLP_F	2022-01-30	3	1	0.923077	0.234836
1925	484	Trp_Fru_FLP_F	2022-01-30	4	1	1.03846	0.187951
1926	485	Trp_Fru_FLP_F	2022-01-30	5	1	1.23077	0.217027
1927	486	Trp_Fru_FLP_F	2022-01-30	6	1	1.11538	0.230897
1928	487	Trp_Fru_FLP_F	2022-01-30	7	1	0.769231	0.159882
1929	488	Trp_Fru_FLP_F	2022-01-30	8	1	1.23077	0.300296
1930	489	Trp_Fru_FLP_F	2022-01-30	9	1	1	0.175412
1931	490	Trp_Fru_FLP_F	2022-01-30	10	1	0.769231	0.169231
1932	491	Trp_Fru_FLP_F	2022-01-30	11	1	0.923077	0.191537
1933	492	Trp_Fru_FLP_F	2022-01-30	12	1	1.11538	0.250089
1934	493	Trp_Fru_FLP_F	2022-01-30	13	0.5	0.923077	0.25373
1935	494	Trp_Fru_FLP_F	2022-01-30	14	1	1.23077	0.430769
1936	495	Trp_Fru_FLP_F	2022-01-30	15	0.5	1.11538	0.347859
1937	496	Trp_Fru_FLP_F	2022-01-30	16	0	0.961538	0.325722
1938	497	Trp_Fru_FLP_F	2022-01-30	17	1	1.42308	0.333619
1939	498	Trp_Fru_FLP_F	2022-01-30	18	1	0.961538	0.203665
1940	499	Trp_Fru_FLP_F	2022-01-30	19	0.5	0.923077	0.221346
1941	500	Trp_Fru_FLP_F	2022-01-30	20	0.5	0.923077	0.276923
1942	501	Trp_Fru_FLP_F	2022-01-30	21	1	1.30769	0.302651
1943	502	Trp_Fru_FLP_F	2022-01-30	22	1	1.76923	0.654705
1944	503	Trp_Fru_FLP_F	2022-01-30	23	1	0.846154	0.189674
1945	504	Trp_Fru_FLP_F	2022-01-30	24	1	1.03846	0.268791
1946	505	Trp_Fru_FLP_F	2022-01-30	25	1	0.769231	0.169231
1947	506	Trp_Fru_FLP_F	2022-01-30	26	1	0.692308	0.14432
1948	507	Trp_Fru_FLP_F	2022-01-30	27	0	0.576923	0.148563
1949	508	Trp_Fru_FLP_F	2022-01-30	28	1	0.653846	0.135218
1950	509	Trp_Fru_FLP_F	2022-01-30	29	1	0.961538	0.195965
1951	510	Trp_Fru_FLP_F	2022-01-30	30	0	1.5	0.666218
1952	511	Trp_Fru_FLP_F	2022-01-30	31	1	1.61538	0.600197
1953	512	Trp_Fru_FLP_F	2022-01-30	32	1	1.03846	0.244828
1954	513	Trp_Fru_FLP_F	2022-01-30	33	0.5	0.961538	0.23192
1955	514	Trp_Fru_FLP_F	2022-01-30	34	1	2.61538	1.70797
1956	515	Trp_Fru_FLP_F	2022-01-30	35	0.5	3	2.09027
1957	516	Trp_Fru_FLP_F	2022-01-30	36	0	0.807692	0.207692
1958	517	Trp_Fru_FLP_F	2022-01-30	37	0	1.11538	0.437921
1959	518	Trp_Fru_FLP_F	2022-01-30	38	0	0.923077	0.303432
1960	519	Trp_Fru_FLP_F	2022-01-30	39	0	0.884615	0.267909
1961	520	Trp_Fru_FLP_F	2022-01-30	40	0	0.846154	0.233319
1962	521	Trp_Fru_FLP_F	2022-01-30	41	0	0.769231	0.209818
1963	522	Trp_Fru_FLP_F	2022-01-30	42	0	0.923077	0.346068
1964	523	Trp_Fru_FLP_F	2022-01-30	43	0	0.461538	0.149159
1965	524	Trp_Fru_FLP_F	2022-01-30	44	0	0.461538	0.138462
1966	525	Trp_Fru_FLP_F	2022-01-30	45	0	1	0.266025
1967	526	Trp_Fru_FLP_F	2022-01-30	46	0	1.03846	0.339596
1968	527	Trp_Fru_FLP_F	2022-01-30	47	0	2.11538	0.608471
1969	528	Trp_Fru_FLP_F	2022-01-30	48	0	1.53846	0.560853
1970	529	Trp_Fru_FLP_F	2022-01-30	49	0	1.11538	0.356595
1971	530	Trp_Fru_FLP_F	2022-01-30	50	0	1.61538	0.708361
1972	531	Trp_Fru_FLP_F	2022-01-30	51	0	1.53846	0.949868
1973	532	Trp_Fru_FLP_F	2022-01-30	52	0	0.692308	0.213175
1974	533	Trp_Fru_FLP_F	2022-01-30	53	0	0.769231	0.305376
1975	534	Trp_Fru_FLP_F	2022-01-30	54	1	0.807692	0.166588
1976	535	Trp_Fru_FLP_F	2022-01-30	55	1	2.61538	1.06998
1977	536	Trp_Fru_FLP_F	2022-01-30	56	0	0.615385	0.184615
1978	537	Trp_Fru_FLP_F	2022-01-30	57	0	1.30769	0.545666
1979	538	Trp_Fru_FLP_F	2022-01-30	58	0	0.846154	0.312274
1980	539	Trp_Fru_FLP_F	2022-01-30	59	0	0.923077	0.259722
1981	540	Trp_Fru_FLP_F	2022-01-30	60	0	0.423077	0.148563
1982	541	Trp_Fru_FLP_F	2022-01-30	61	0	0.615385	0.222413
1983	542	Trp_Fru_FLP_F	2022-01-30	62	0	0.692308	0.220274
1984	543	Trp_Fru_FLP_F	2022-01-30	63	0	0.730769	0.204245
1985	544	Trp_Fru_FLP_F	2022-01-30	64	0	0.730769	0.251504
1986	545	Trp_Fru_FLP_F	2022-01-30	65	0	0.576923	0.21607
1987	546	Trp_Fru_FLP_F	2022-01-30	66	0	0.653846	0.327894
1988	547	Trp_Fru_FLP_F	2022-01-30	67	0	0.692308	0.302651
1989	548	Trp_Fru_FLP_F	2022-01-30	68	0	0.846154	0.22663
1990	549	Trp_Fru_FLP_F	2022-01-30	69	0	0.576923	0.208829
1991	550	Trp_Fru_FLP_F	2022-01-30	70	0	0.5	0.168705
1992	551	Trp_Fru_FLP_F	2022-01-30	71	0	0.538462	0.201767
1993	552	Trp_Fru_FLP_F	2022-01-30	72	0	0.307692	0.107692
1994	553	Trp_Fru_FLP_F	2022-01-30	73	0	0.692308	0.302651
1995	554	Trp_Fru_FLP_F	2022-01-30	74	0	0.653846	0.199556
1996	555	Trp_Fru_FLP_F	2022-01-30	75	0	1	0.433235
1997	556	Trp_Fru_FLP_F	2022-01-30	76	0	2.96154	2.29547
1998	557	Trp_Fru_FLP_F	2022-01-30	77	0	0.307692	0.133235
1999	558	Trp_Fru_FLP_F	2022-01-30	78	0	0.846154	0.269999
[truncated: 84,401 more rows]

## Sheet: 7.DD_mean_and_median_actogram
	Dec_time	Condition	date	Dec_ZT_time	median	mean	sem
1	0	CS_F	2022-02-17	960	0	0.178571	0.073707
2	1	CS_F	2022-02-17	961	0	0.607143	0.248484
3	2	CS_F	2022-02-17	962	0	0.428571	0.269374
4	3	CS_F	2022-02-17	963	0	0.357143	0.193917
5	4	CS_F	2022-02-17	964	0	0.214286	0.129684
6	5	CS_F	2022-02-17	965	0	0.107143	0.0595238
7	6	CS_F	2022-02-17	966	0	0.0357143	0.0357143
8	7	CS_F	2022-02-17	967	0	0.142857	0.0847387
9	8	CS_F	2022-02-17	968	0	0.5	0.259731
10	9	CS_F	2022-02-17	969	0	0.821429	0.524666
11	10	CS_F	2022-02-17	970	0	0.428571	0.214726
12	11	CS_F	2022-02-17	971	0	0.607143	0.353887
13	12	CS_F	2022-02-17	972	0	0.607143	0.361285
14	13	CS_F	2022-02-17	973	0	0.142857	0.099127
15	14	CS_F	2022-02-17	974	0	1.25	0.691263
16	15	CS_F	2022-02-17	975	0	1.03571	0.62251
17	16	CS_F	2022-02-17	976	0	0.321429	0.206082
18	17	CS_F	2022-02-17	977	0	0.214286	0.129684
19	18	CS_F	2022-02-17	978	0	0.178571	0.089879
20	19	CS_F	2022-02-17	979	0	0.214286	0.107363
21	20	CS_F	2022-02-17	980	0	0.357143	0.258272
22	21	CS_F	2022-02-17	981	0	0.107143	0.0786676
23	22	CS_F	2022-02-17	982	0	0.571429	0.288348
24	23	CS_F	2022-02-17	983	0	0.392857	0.194768
25	24	CS_F	2022-02-17	984	0	0.428571	0.264418
26	25	CS_F	2022-02-17	985	0	0.357143	0.200623
27	26	CS_F	2022-02-17	986	0	0.214286	0.157335
28	27	CS_F	2022-02-17	987	0	0.107143	0.0786676
29	28	CS_F	2022-02-17	988	0	1.07143	0.650455
30	29	CS_F	2022-02-17	989	0	0.678571	0.537123
31	30	CS_F	2022-02-17	990	0	0.392857	0.231965
32	31	CS_F	2022-02-17	991	0	0.321429	0.163085
33	32	CS_F	2022-02-17	992	0	0.142857	0.111677
34	33	CS_F	2022-02-17	993	0	0.0357143	0.0357143
35	34	CS_F	2022-02-17	994	0	0.142857	0.0847387
36	35	CS_F	2022-02-17	995	0	0.678571	0.442616
37	36	CS_F	2022-02-17	996	0	0.678571	0.341385
38	37	CS_F	2022-02-17	997	0	0.25	0.159571
39	38	CS_F	2022-02-17	998	0	0.642857	0.360828
40	39	CS_F	2022-02-17	999	0	0.214286	0.107363
41	40	CS_F	2022-02-17	1000	0	0.0714286	0.0714286
42	41	CS_F	2022-02-17	1001	0	0.25	0.159571
43	42	CS_F	2022-02-17	1002	0	0.0357143	0.0357143
44	43	CS_F	2022-02-17	1003	0	0.0714286	0.0714286
45	44	CS_F	2022-02-17	1004	0	0.464286	0.279276
46	45	CS_F	2022-02-17	1005	0	0.25	0.121988
47	46	CS_F	2022-02-17	1006	0	0.535714	0.379648
48	47	CS_F	2022-02-17	1007	0	0.178571	0.089879
49	48	CS_F	2022-02-17	1008	0	0.107143	0.0786676
50	49	CS_F	2022-02-17	1009	0	0.25	0.151054
51	50	CS_F	2022-02-17	1010	0	0.142857	0.0847387
52	51	CS_F	2022-02-17	1011	0	1	0.821342
53	52	CS_F	2022-02-17	1012	0	0.607143	0.39621
54	53	CS_F	2022-02-17	1013	0	0.678571	0.308836
55	54	CS_F	2022-02-17	1014	0	0.178571	0.145965
56	55	CS_F	2022-02-17	1015	0	0.178571	0.103555
57	56	CS_F	2022-02-17	1016	0	0.571429	0.214726
58	57	CS_F	2022-02-17	1017	0	0.321429	0.224513
59	58	CS_F	2022-02-17	1018	0	0.25	0.121988
60	59	CS_F	2022-02-17	1019	0	0.821429	0.488095
61	60	CS_F	2022-02-17	1020	0	0.821429	0.644582
62	61	CS_F	2022-02-17	1021	0	0.357143	0.147414
63	62	CS_F	2022-02-17	1022	0	0.392857	0.207908
64	63	CS_F	2022-02-17	1023	0	0.714286	0.473804
65	64	CS_F	2022-02-17	1024	0	0.357143	0.219513
66	65	CS_F	2022-02-17	1025	0	0.285714	0.191466
67	66	CS_F	2022-02-17	1026	0	0.321429	0.178571
68	67	CS_F	2022-02-17	1027	0	0.285714	0.134687
69	68	CS_F	2022-02-17	1028	0	0.107143	0.0595238
70	69	CS_F	2022-02-17	1029	0	0.178571	0.145965
71	70	CS_F	2022-02-17	1030	0	0.607143	0.35013
72	71	CS_F	2022-02-17	1031	0	0.214286	0.129684
73	72	CS_F	2022-02-17	1032	0	0.0357143	0.0357143
74	73	CS_F	2022-02-17	1033	0	0.142857	0.142857
75	74	CS_F	2022-02-17	1034	0	0.178571	0.145965
76	75	CS_F	2022-02-17	1035	0	0.107143	0.0595238
77	76	CS_F	2022-02-17	1036	0	0.25	0.182755
78	77	CS_F	2022-02-17	1037	0	0.178571	0.103555
79	78	CS_F	2022-02-17	1038	0	0.0357143	0.0357143
80	79	CS_F	2022-02-17	1039	0	0.357143	0.253099
81	80	CS_F	2022-02-17	1040	0	0.0357143	0.0357143
82	81	CS_F	2022-02-17	1041	0	0.428571	0.393158
83	82	CS_F	2022-02-17	1042	0	0.464286	0.306379
84	83	CS_F	2022-02-17	1043	0	0.142857	0.0847387
85	84	CS_F	2022-02-17	1044	0	0.357143	0.225458
86	85	CS_F	2022-02-17	1045	0	0.178571	0.089879
87	86	CS_F	2022-02-17	1046	0	0.392857	0.248484
88	87	CS_F	2022-02-17	1047	0	0.107143	0.0786676
89	88	CS_F	2022-02-17	1048	0	1.21429	0.966854
90	89	CS_F	2022-02-17	1049	0	0.392857	0.201445
91	90	CS_F	2022-02-17	1050	0	1.03571	0.706137
92	91	CS_F	2022-02-17	1051	0	0.678571	0.421177
93	92	CS_F	2022-02-17	1052	0	1.39286	0.820278
94	93	CS_F	2022-02-17	1053	0	0.107143	0.0595238
95	94	CS_F	2022-02-17	1054	0	0.107143	0.0595238
96	95	CS_F	2022-02-17	1055	0	0.428571	0.254216
97	96	CS_F	2022-02-17	1056	0	0.0357143	0.0357143
98	97	CS_F	2022-02-17	1057	0	0.464286	0.232778
99	98	CS_F	2022-02-17	1058	0	0.678571	0.352818
100	99	CS_F	2022-02-17	1059	0	0.321429	0.185831
101	100	CS_F	2022-02-17	1060	0	0.428571	0.188482
102	101	CS_F	2022-02-17	1061	0	0.714286	0.442029
103	102	CS_F	2022-02-17	1062	0	1.25	0.50559
104	103	CS_F	2022-02-17	1063	0	0.535714	0.202381
105	104	CS_F	2022-02-17	1064	0	0.928571	0.621333
106	105	CS_F	2022-02-17	1065	0	0.214286	0.119048
107	106	CS_F	2022-02-17	1066	0	1.35714	0.676933
108	107	CS_F	2022-02-17	1067	0	0.535714	0.243878
109	108	CS_F	2022-02-17	1068	0	0.214286	0.119048
110	109	CS_F	2022-02-17	1069	0	0.857143	0.429452
111	110	CS_F	2022-02-17	1070	0	0.821429	0.374638
112	111	CS_F	2022-02-17	1071	0	1.25	0.698875
113	112	CS_F	2022-02-17	1072	0	0.392857	0.180675
114	113	CS_F	2022-02-17	1073	0	0.464286	0.335241
115	114	CS_F	2022-02-17	1074	0	0.785714	0.357672
116	115	CS_F	2022-02-17	1075	0	0.392857	0.207908
117	116	CS_F	2022-02-17	1076	0	0.892857	0.322602
118	117	CS_F	2022-02-17	1077	0	0.571429	0.283723
119	118	CS_F	2022-02-17	1078	0	0.357143	0.164383
120	119	CS_F	2022-02-17	1079	0	1.64286	0.924697
121	120	CS_F	2022-02-17	1080	0	0.535714	0.232778
122	121	CS_F	2022-02-17	1081	0	0.678571	0.304523
123	122	CS_F	2022-02-17	1082	0	0.678571	0.241543
124	123	CS_F	2022-02-17	1083	0	0.5	0.215166
125	124	CS_F	2022-02-17	1084	0	1.21429	0.766972
126	125	CS_F	2022-02-17	1085	0	1	0.496016
127	126	CS_F	2022-02-17	1086	0	0.535714	0.243878
128	127	CS_F	2022-02-17	1087	0	0.714286	0.352081
129	128	CS_F	2022-02-17	1088	0	0.5	0.249338
130	129	CS_F	2022-02-17	1089	0	0.607143	0.301404
131	130	CS_F	2022-02-17	1090	0	0.392857	0.187854
132	131	CS_F	2022-02-17	1091	0	0.571429	0.301796
133	132	CS_F	2022-02-17	1092	0	0.321429	0.236003
134	133	CS_F	2022-02-17	1093	0	0.857143	0.336156
135	134	CS_F	2022-02-17	1094	0	0.285714	0.153074
136	135	CS_F	2022-02-17	1095	0	1.64286	0.793849
137	136	CS_F	2022-02-17	1096	0	1.57143	0.933544
138	137	CS_F	2022-02-17	1097	0	1.89286	0.877917
139	138	CS_F	2022-02-17	1098	0	1.60714	0.968197
140	139	CS_F	2022-02-17	1099	0	2.39286	1.50514
141	140	CS_F	2022-02-17	1100	0	1.39286	0.882426
142	141	CS_F	2022-02-17	1101	0	0.321429	0.145965
143	142	CS_F	2022-02-17	1102	0	1.03571	0.559861
144	143	CS_F	2022-02-17	1103	0	0.535714	0.232778
145	144	CS_F	2022-02-17	1104	0	0.285714	0.161484
146	145	CS_F	2022-02-17	1105	0	0.392857	0.292496
147	146	CS_F	2022-02-17	1106	0	0.357143	0.179758
148	147	CS_F	2022-02-17	1107	0	1.57143	0.906223
149	148	CS_F	2022-02-17	1108	0	1.10714	0.859647
150	149	CS_F	2022-02-17	1109	0	0.571429	0.2208
151	150	CS_F	2022-02-17	1110	0	0.107143	0.0786676
152	151	CS_F	2022-02-17	1111	0	0.25	0.142028
153	152	CS_F	2022-02-17	1112	0	0.535714	0.215056
154	153	CS_F	2022-02-17	1113	0	0.678571	0.345238
155	154	CS_F	2022-02-17	1114	0	0.535714	0.215056
156	155	CS_F	2022-02-17	1115	0	1.17857	0.666773
157	156	CS_F	2022-02-17	1116	0	1.17857	0.860745
158	157	CS_F	2022-02-17	1117	0	0.5	0.306456
159	158	CS_F	2022-02-17	1118	0	0.178571	0.073707
160	159	CS_F	2022-02-17	1119	0	1.92857	1.23756
161	160	CS_F	2022-02-17	1120	0	1	0.757677
162	161	CS_F	2022-02-17	1121	0	0.178571	0.115625
163	162	CS_F	2022-02-17	1122	0	1.28571	0.968904
164	163	CS_F	2022-02-17	1123	0	0.892857	0.749496
165	164	CS_F	2022-02-17	1124	0	0.25	0.110614
166	165	CS_F	2022-02-17	1125	0	0.178571	0.145965
167	166	CS_F	2022-02-17	1126	0	0.0714286	0.0495635
168	167	CS_F	2022-02-17	1127	0	1	0.493342
169	168	CS_F	2022-02-17	1128	0	0.0714286	0.0495635
170	169	CS_F	2022-02-17	1129	0	0.571429	0.292899
171	170	CS_F	2022-02-17	1130	0	0.25	0.215933
172	171	CS_F	2022-02-17	1131	0	0.214286	0.157335
173	172	CS_F	2022-02-17	1132	0	0.285714	0.204817
174	173	CS_F	2022-02-17	1133	0	0.107143	0.0786676
175	174	CS_F	2022-02-17	1134	0	0.142857	0.099127
176	175	CS_F	2022-02-17	1135	0	0.285714	0.223353
177	176	CS_F	2022-02-17	1136	0	0.285714	0.223353
178	177	CS_F	2022-02-17	1137	0	0.285714	0.204817
179	178	CS_F	2022-02-17	1138	0	0.5	0.339233
180	179	CS_F	2022-02-17	1139	0	0.571429	0.243587
181	180	CS_F	2022-02-17	1140	0	0.892857	0.483427
182	181	CS_F	2022-02-17	1141	0	0.357143	0.179758
183	182	CS_F	2022-02-17	1142	0	1.60714	0.970926
184	183	CS_F	2022-02-17	1143	0	1.10714	0.554776
185	184	CS_F	2022-02-17	1144	0	0.178571	0.103555
186	185	CS_F	2022-02-17	1145	0	0.392857	0.207908
187	186	CS_F	2022-02-17	1146	0	0.75	0.50559
188	187	CS_F	2022-02-17	1147	0	0.821429	0.53958
189	188	CS_F	2022-02-17	1148	0	0.642857	0.35342
190	189	CS_F	2022-02-17	1149	0	0.428571	0.283723
191	190	CS_F	2022-02-17	1150	0	0.357143	0.207111
192	191	CS_F	2022-02-17	1151	0	0.607143	0.35013
193	192	CS_F	2022-02-17	1152	0	0.571429	0.306148
194	193	CS_F	2022-02-17	1153	0	0.107143	0.0595238
195	194	CS_F	2022-02-17	1154	0	0.25	0.151054
196	195	CS_F	2022-02-17	1155	0	0.464286	0.264686
197	196	CS_F	2022-02-17	1156	0	0.392857	0.214175
198	197	CS_F	2022-02-17	1157	0	0.785714	0.469597
199	198	CS_F	2022-02-17	1158	0	0.928571	0.411246
200	199	CS_F	2022-02-17	1159	0	0.0714286	0.0714286
201	200	CS_F	2022-02-17	1160	0	0.892857	0.443469
202	201	CS_F	2022-02-17	1161	0	0.0714286	0.0714286
203	202	CS_F	2022-02-17	1162	0	0.464286	0.202381
204	203	CS_F	2022-02-17	1163	0	0.928571	0.363437
205	204	CS_F	2022-02-17	1164	0	0.535714	0.243878
206	205	CS_F	2022-02-17	1165	0	0.428571	0.208475
207	206	CS_F	2022-02-17	1166	0	0.964286	0.494633
208	207	CS_F	2022-02-17	1167	0	0.357143	0.253099
209	208	CS_F	2022-02-17	1168	0	1.17857	0.395255
210	209	CS_F	2022-02-17	1169	0	1.21429	0.449447
211	210	CS_F	2022-02-17	1170	0	0.928571	0.445223
212	211	CS_F	2022-02-17	1171	0	0.571429	0.2208
213	212	CS_F	2022-02-17	1172	0	0.392857	0.129501
214	213	CS_F	2022-02-17	1173	0	0.321429	0.126549
215	214	CS_F	2022-02-17	1174	0	0.964286	0.372615
216	215	CS_F	2022-02-17	1175	0	0.678571	0.295708
217	216	CS_F	2022-02-17	1176	0	0.571429	0.214726
218	217	CS_F	2022-02-17	1177	0	0.321429	0.154762
219	218	CS_F	2022-02-17	1178	0	1	0.544331
220	219	CS_F	2022-02-17	1179	0	0.428571	0.181328
221	220	CS_F	2022-02-17	1180	0	0.357143	0.147414
222	221	CS_F	2022-02-17	1181	0	0.321429	0.145965
223	222	CS_F	2022-02-17	1182	0	0.75	0.311274
224	223	CS_F	2022-02-17	1183	0	0.25	0.110614
225	224	CS_F	2022-02-17	1184	0	0.571429	0.195374
226	225	CS_F	2022-02-17	1185	0	0.75	0.327832
227	226	CS_F	2022-02-17	1186	0	0.321429	0.126549
228	227	CS_F	2022-02-17	1187	0	0.392857	0.287938
229	228	CS_F	2022-02-17	1188	0	0.571429	0.259367
230	229	CS_F	2022-02-17	1189	0	0.321429	0.136602
231	230	CS_F	2022-02-17	1190	0	0.821429	0.608697
232	231	CS_F	2022-02-17	1191	0	0.321429	0.136602
233	232	CS_F	2022-02-17	1192	0	0.5	0.227128
234	233	CS_F	2022-02-17	1193	0	0.107143	0.0786676
235	234	CS_F	2022-02-17	1194	0	0.642857	0.296426
236	235	CS_F	2022-02-17	1195	0	0.75	0.41348
237	236	CS_F	2022-02-17	1196	0	0.75	0.265399
238	237	CS_F	2022-02-17	1197	0	0.714286	0.471003
239	238	CS_F	2022-02-17	1198	0	0.785714	0.326749
240	239	CS_F	2022-02-17	1199	0	0.571429	0.288348
241	240	CS_F	2022-02-17	1200	0	0.5	0.327327
242	241	CS_F	2022-02-17	1201	0	0.321429	0.145965
243	242	CS_F	2022-02-17	1202	0	0.535714	0.302031
244	243	CS_F	2022-02-17	1203	0	0.535714	0.243878
245	244	CS_F	2022-02-17	1204	0	0.464286	0.274499
246	245	CS_F	2022-02-17	1205	0	0.571429	0.279022
247	246	CS_F	2022-02-17	1206	0	0.857143	0.590297
248	247	CS_F	2022-02-17	1207	0	0.25	0.110614
249	248	CS_F	2022-02-17	1208	0	0.321429	0.224513
250	249	CS_F	2022-02-17	1209	0	0.142857	0.0847387
251	250	CS_F	2022-02-17	1210	0	0.607143	0.305762
252	251	CS_F	2022-02-17	1211	0	0.178571	0.115625
253	252	CS_F	2022-02-17	1212	0	0.571429	0.306148
254	253	CS_F	2022-02-17	1213	0	0.678571	0.479896
255	254	CS_F	2022-02-17	1214	0	1.14286	0.635615
256	255	CS_F	2022-02-17	1215	0	0.357143	0.193917
257	256	CS_F	2022-02-17	1216	0	0.642857	0.30522
258	257	CS_F	2022-02-17	1217	0	0.535714	0.297619
259	258	CS_F	2022-02-17	1218	0	0.75	0.538529
260	259	CS_F	2022-02-17	1219	0	0.75	0.358661
261	260	CS_F	2022-02-17	1220	0	0.321429	0.192818
262	261	CS_F	2022-02-17	1221	0	0.178571	0.103555
263	262	CS_F	2022-02-17	1222	0	0.285714	0.161484
264	263	CS_F	2022-02-17	1223	0	0.321429	0.218542
265	264	CS_F	2022-02-17	1224	0	0.142857	0.0847387
266	265	CS_F	2022-02-17	1225	0	0.357143	0.322089
267	266	CS_F	2022-02-17	1226	0	0.428571	0.322968
268	267	CS_F	2022-02-17	1227	0	0.607143	0.263971
269	268	CS_F	2022-02-17	1228	0	0.642857	0.32617
270	269	CS_F	2022-02-17	1229	0	0.285714	0.134687
271	270	CS_F	2022-02-17	1230	0	0.107143	0.0786676
272	271	CS_F	2022-02-17	1231	0	0.5	0.221228
273	272	CS_F	2022-02-17	1232	0	0.285714	0.144174
274	273	CS_F	2022-02-17	1233	0	0.392857	0.292496
275	274	CS_F	2022-02-17	1234	0	0.464286	0.188857
276	275	CS_F	2022-02-17	1235	0	0.321429	0.171004
277	276	CS_F	2022-02-17	1236	0	0.178571	0.145965
278	277	CS_F	2022-02-17	1237	0	0.25	0.132388
279	278	CS_F	2022-02-17	1238	0	0.535714	0.269637
280	279	CS_F	2022-02-17	1239	0	0.392857	0.27381
281	280	CS_F	2022-02-17	1240	0	0.75	0.339721
282	281	CS_F	2022-02-17	1241	0	0.642857	0.287363
283	282	CS_F	2022-02-17	1242	0	0.357143	0.164383
284	283	CS_F	2022-02-17	1243	0	0.714286	0.294828
285	284	CS_F	2022-02-17	1244	0	0.535714	0.302031
286	285	CS_F	2022-02-17	1245	0	0.0714286	0.0495635
287	286	CS_F	2022-02-17	1246	0	0.571429	0.226712
288	287	CS_F	2022-02-17	1247	0	0.357143	0.253099
289	288	CS_F	2022-02-17	1248	0	0.285714	0.134687
290	289	CS_F	2022-02-17	1249	0	0.5	0.238492
291	290	CS_F	2022-02-17	1250	0	0.535714	0.297619
292	291	CS_F	2022-02-17	1251	0	0.678571	0.31309
293	292	CS_F	2022-02-17	1252	0	0.571429	0.264418
294	293	CS_F	2022-02-17	1253	0	1.60714	0.808911
295	294	CS_F	2022-02-17	1254	0	0.285714	0.161484
296	295	CS_F	2022-02-17	1255	0	0.464286	0.208815
297	296	CS_F	2022-02-17	1256	0	0.892857	0.353887
298	297	CS_F	2022-02-17	1257	0	0.928571	0.320914
299	298	CS_F	2022-02-17	1258	0	0.571429	0.301796
300	299	CS_F	2022-02-17	1259	0	0.607143	0.207908
301	300	CS_F	2022-02-17	1260	0	0.785714	0.31437
302	301	CS_F	2022-02-17	1261	0	0.571429	0.379461
303	302	CS_F	2022-02-17	1262	0	1.25	0.481469
304	303	CS_F	2022-02-17	1263	0	1.07143	0.394836
305	304	CS_F	2022-02-17	1264	0	0.5	0.243975
306	305	CS_F	2022-02-17	1265	0	0.571429	0.274241
307	306	CS_F	2022-02-17	1266	0	0.964286	0.587529
308	307	CS_F	2022-02-17	1267	0	1.67857	1.11869
309	308	CS_F	2022-02-17	1268	0	0.678571	0.321429
310	309	CS_F	2022-02-17	1269	0	0.285714	0.17711
311	310	CS_F	2022-02-17	1270	0	0.392857	0.220265
312	311	CS_F	2022-02-17	1271	0	0.142857	0.0847387
313	312	CS_F	2022-02-17	1272	0	0.142857	0.099127
314	313	CS_F	2022-02-17	1273	0	0.0714286	0.0495635
315	314	CS_F	2022-02-17	1274	0	1.42857	0.988597
316	315	CS_F	2022-02-17	1275	0	0.357143	0.186972
317	316	CS_F	2022-02-17	1276	0	0.75	0.397163
318	317	CS_F	2022-02-17	1277	0	0.142857	0.0847387
319	318	CS_F	2022-02-17	1278	0	0.642857	0.317956
320	319	CS_F	2022-02-17	1279	0	0.75	0.365963
321	320	CS_F	2022-02-17	1280	0	0.357143	0.231251
322	321	CS_F	2022-02-17	1281	0	0.571429	0.214726
323	322	CS_F	2022-02-17	1282	0	0.5	0.269725
324	323	CS_F	2022-02-17	1283	0	0.714286	0.27147
325	324	CS_F	2022-02-17	1284	0	0.142857	0.0847387
326	325	CS_F	2022-02-17	1285	0	0.571429	0.396508
327	326	CS_F	2022-02-17	1286	0	0.142857	0.0847387
328	327	CS_F	2022-02-17	1287	0	0.392857	0.180675
329	328	CS_F	2022-02-17	1288	0	0.428571	0.254216
330	329	CS_F	2022-02-17	1289	0	0.392857	0.22619
331	330	CS_F	2022-02-17	1290	0	0.714286	0.348303
332	331	CS_F	2022-02-17	1291	0	0.321429	0.185831
333	332	CS_F	2022-02-17	1292	0	0.357143	0.164383
334	333	CS_F	2022-02-17	1293	0	1.25	0.691263
335	334	CS_F	2022-02-17	1294	0	0.392857	0.207908
336	335	CS_F	2022-02-17	1295	0	0.607143	0.194768
337	336	CS_F	2022-02-17	1296	0	0.535714	0.327255
338	337	CS_F	2022-02-17	1297	0	0.464286	0.158383
339	338	CS_F	2022-02-17	1298	0	0.928571	0.451126
340	339	CS_F	2022-02-17	1299	0	0.214286	0.0942408
341	340	CS_F	2022-02-17	1300	0	0.214286	0.107363
342	341	CS_F	2022-02-17	1301	0	0.357143	0.156129
343	342	CS_F	2022-02-17	1302	0	0.5	0.195857
344	343	CS_F	2022-02-17	1303	0	0.607143	0.278599
345	344	CS_F	2022-02-17	1304	0	0.392857	0.148531
346	345	CS_F	2022-02-17	1305	0	0.785714	0.232067
347	346	CS_F	2022-02-17	1306	0	0.535714	0.243878
348	347	CS_F	2022-02-17	1307	0	0.75	0.265399
349	348	CS_F	2022-02-17	1308	0	1.03571	0.38996
350	349	CS_F	2022-02-17	1309	0	0.678571	0.212404
351	350	CS_F	2022-02-17	1310	0	0.75	0.244652
352	351	CS_F	2022-02-17	1311	0	0.892857	0.231965
353	352	CS_F	2022-02-17	1312	0	0.5	0.181848
354	353	CS_F	2022-02-17	1313	0	0.464286	0.158383
355	354	CS_F	2022-02-17	1314	0	0.607143	0.27381
356	355	CS_F	2022-02-17	1315	0	0.678571	0.352818
357	356	CS_F	2022-02-17	1316	0	0.892857	0.372107
358	357	CS_F	2022-02-17	1317	0	0.642857	0.499244
359	358	CS_F	2022-02-17	1318	0	0.75	0.315495
360	359	CS_F	2022-02-17	1319	0	0.714286	0.355818
361	360	CS_F	2022-02-17	1320	0	0.75	0.583333
362	361	CS_F	2022-02-17	1321	0	0.214286	0.107363
363	362	CS_F	2022-02-17	1322	0	0.321429	0.163085
364	363	CS_F	2022-02-17	1323	0	0.357143	0.258272
365	364	CS_F	2022-02-17	1324	0	0.5	0.302109
366	365	CS_F	2022-02-17	1325	0	0.964286	0.520689
367	366	CS_F	2022-02-17	1326	0	0.428571	0.214726
368	367	CS_F	2022-02-17	1327	0	0.392857	0.180675
369	368	CS_F	2022-02-17	1328	0	0.535714	0.243878
370	369	CS_F	2022-02-17	1329	0	1.25	0.596784
371	370	CS_F	2022-02-17	1330	0	0.178571	0.089879
372	371	CS_F	2022-02-17	1331	0	1.10714	0.593927
373	372	CS_F	2022-02-17	1332	0	0.964286	0.4033
374	373	CS_F	2022-02-17	1333	0	1.28571	0.676235
375	374	CS_F	2022-02-17	1334	0	0.464286	0.181718
376	375	CS_F	2022-02-17	1335	0	0.642857	0.263344
377	376	CS_F	2022-02-17	1336	0	0.5	0.238492
378	377	CS_F	2022-02-17	1337	0	1.07143	0.514161
379	378	CS_F	2022-02-17	1338	0	0.178571	0.103555
380	379	CS_F	2022-02-17	1339	0	0.428571	0.166099
381	380	CS_F	2022-02-17	1340	0	0.535714	0.396686
382	381	CS_F	2022-02-17	1341	0	0.5	0.188982
383	382	CS_F	2022-02-17	1342	0	0.428571	0.232473
384	383	CS_F	2022-02-17	1343	0	0.25	0.159571
385	384	CS_F	2022-02-17	1344	0	0.5	0.188982
386	385	CS_F	2022-02-17	1345	0	0.678571	0.212404
387	386	CS_F	2022-02-17	1346	0	0.214286	0.0789673
388	387	CS_F	2022-02-17	1347	0	0.642857	0.282722
389	388	CS_F	2022-02-17	1348	0	0.857143	0.336156
390	389	CS_F	2022-02-17	1349	0	0.607143	0.353887
391	390	CS_F	2022-02-17	1350	0	0.428571	0.232473
392	391	CS_F	2022-02-17	1351	0	0.392857	0.214175
393	392	CS_F	2022-02-17	1352	0	0.964286	0.562219
394	393	CS_F	2022-02-17	1353	0	0.892857	0.346331
395	394	CS_F	2022-02-17	1354	0	0.714286	0.2763
396	395	CS_F	2022-02-17	1355	0	0.642857	0.231251
397	396	CS_F	2022-02-17	1356	0	0.678571	0.267526
398	397	CS_F	2022-02-17	1357	0	0.357143	0.13815
399	398	CS_F	2022-02-17	1358	0	0.357143	0.128218
400	399	CS_F	2022-02-17	1359	0	0.714286	0.261544
401	400	CS_F	2022-02-17	1360	0	0.5	0.215166
402	401	CS_F	2022-02-17	1361	0	0.464286	0.174287
403	402	CS_F	2022-02-17	1362	0	0.25	0.151054
404	403	CS_F	2022-02-17	1363	0	0.535714	0.195736
405	404	CS_F	2022-02-17	1364	0	0.928571	0.3812
406	405	CS_F	2022-02-17	1365	0	0.678571	0.277239
407	406	CS_F	2022-02-17	1366	0	0.928571	0.551402
408	407	CS_F	2022-02-17	1367	0	0.678571	0.414849
409	408	CS_F	2022-02-17	1368	0	0.178571	0.115625
410	409	CS_F	2022-02-17	1369	0	0.392857	0.1732
411	410	CS_F	2022-02-17	1370	0	0.428571	0.188482
412	411	CS_F	2022-02-17	1371	0	0.714286	0.380952
413	412	CS_F	2022-02-17	1372	0	0.928571	0.474003
414	413	CS_F	2022-02-17	1373	0	2.10714	1.28724
415	414	CS_F	2022-02-17	1374	0	0.857143	0.784631
416	415	CS_F	2022-02-17	1375	0	0.678571	0.445594
417	416	CS_F	2022-02-17	1376	0	0.357143	0.236902
418	417	CS_F	2022-02-17	1377	0	0.0357143	0.0357143
419	418	CS_F	2022-02-17	1378	0	0.321429	0.145965
420	419	CS_F	2022-02-17	1379	0	0.571429	0.403125
421	420	CS_F	2022-02-17	1380	0	0.392857	0.194768
422	421	CS_F	2022-02-17	1381	0	1.03571	0.489255
423	422	CS_F	2022-02-17	1382	0	0.285714	0.134687
424	423	CS_F	2022-02-17	1383	0	0.607143	0.27381
425	424	CS_F	2022-02-17	1384	0	0.214286	0.107363
426	425	CS_F	2022-02-17	1385	0	0.892857	0.402832
427	426	CS_F	2022-02-17	1386	0	0.535714	0.149798
428	427	CS_F	2022-02-17	1387	0	0.357143	0.219513
429	428	CS_F	2022-02-17	1388	0	0.464286	0.195736
430	429	CS_F	2022-02-17	1389	0	0.714286	0.324719
431	430	CS_F	2022-02-17	1390	0	1.46429	0.628852
432	431	CS_F	2022-02-17	1391	0	0.785714	0.338676
433	432	CS_F	2022-02-17	1392	0	0.678571	0.262535
434	433	CS_F	2022-02-17	1393	0	0.642857	0.179758
435	434	CS_F	2022-02-17	1394	0	0.785714	0.357672
436	435	CS_F	2022-02-17	1395	0	0.785714	0.446495
437	436	CS_F	2022-02-17	1396	0	0.821429	0.427412
438	437	CS_F	2022-02-17	1397	0	1.17857	0.608697
439	438	CS_F	2022-02-17	1398	0	1.82143	1.38497
440	439	CS_F	2022-02-17	1399	0	1.60714	0.677178
441	440	CS_F	2022-02-17	1400	0	0.285714	0.144174
442	441	CS_F	2022-02-17	1401	0	0.714286	0.332766
443	442	CS_F	2022-02-17	1402	0	1	0.341178
444	443	CS_F	2022-02-17	1403	2	2.85714	0.60578
445	444	CS_F	2022-02-17	1404	2	2.25	0.458964
446	445	CS_F	2022-02-17	1405	1	1.57143	0.310438
447	446	CS_F	2022-02-17	1406	2	2.89286	0.515216
448	447	CS_F	2022-02-17	1407	1	1.60714	0.353887
449	448	CS_F	2022-02-17	1408	2	2.85714	0.538748
450	449	CS_F	2022-02-17	1409	1	1.5	0.269725
451	450	CS_F	2022-02-17	1410	2	2.57143	0.663541
452	451	CS_F	2022-02-17	1411	1.5	1.53571	0.215056
453	452	CS_F	2022-02-17	1412	2	2.46429	0.4033
454	453	CS_F	2022-02-17	1413	1	1.17857	0.224513
455	454	CS_F	2022-02-17	1414	1	2.67857	0.599942
456	455	CS_F	2022-02-17	1415	1	1.92857	0.567946
457	456	CS_F	2022-02-17	1416	1	2.21429	0.790749
458	457	CS_F	2022-02-17	1417	1	2.21429	0.913388
459	458	CS_F	2022-02-17	1418	1	2.32143	1.3773
460	459	CS_F	2022-02-17	1419	1	1.67857	0.381634
461	460	CS_F	2022-02-17	1420	1.5	1.78571	0.353954
462	461	CS_F	2022-02-17	1421	1	1.28571	0.294828
463	462	CS_F	2022-02-17	1422	1	1.60714	0.314295
464	463	CS_F	2022-02-17	1423	1	1.96429	0.530753
465	464	CS_F	2022-02-17	1424	1	1.28571	0.303669
466	465	CS_F	2022-02-17	1425	1	1	0.19245
467	466	CS_F	2022-02-17	1426	1	2.5	1.05848
468	467	CS_F	2022-02-17	1427	1	2.10714	0.636914
469	468	CS_F	2022-02-17	1428	1	1.5	0.406625
470	469	CS_F	2022-02-17	1429	1	1.57143	0.520553
471	470	CS_F	2022-02-17	1430	1	1.60714	0.301404
472	471	CS_F	2022-02-17	1431	1	1.21429	0.220372
473	472	CS_F	2022-02-17	1432	1	1.03571	0.249243
474	473	CS_F	2022-02-17	1433	1	1.82143	0.465911
475	474	CS_F	2022-02-17	1434	1	1.42857	0.264418
476	475	CS_F	2022-02-17	1435	1	1.25	0.275186
477	476	CS_F	2022-02-17	1436	1	0.964286	0.181718
478	477	CS_F	2022-02-17	1437	1	1.42857	0.361612
479	478	CS_F	2022-02-17	1438	0.5	1.17857	0.360238
480	479	CS_F	2022-02-17	1439	1	1.35714	0.296426
481	480	CS_F	2022-02-17	0	0.5	1.75	0.884351
482	481	CS_F	2022-02-17	1	1	1.39286	0.483427
483	482	CS_F	2022-02-17	2	1	1.5	0.390021
484	483	CS_F	2022-02-17	3	1.5	1.57143	0.318846
485	484	CS_F	2022-02-17	4	0	0.857143	0.26082
486	485	CS_F	2022-02-17	5	1	1.35714	0.368086
487	486	CS_F	2022-02-17	6	1	1.57143	0.573739
488	487	CS_F	2022-02-17	7	1	1.64286	0.349657
489	488	CS_F	2022-02-17	8	0	0.857143	0.245134
490	489	CS_F	2022-02-17	9	0	0.571429	0.166099
491	490	CS_F	2022-02-17	10	1	1.71429	0.459633
492	491	CS_F	2022-02-17	11	1	1.32143	0.378152
493	492	CS_F	2022-02-17	12	1	1.32143	0.329556
494	493	CS_F	2022-02-17	13	0	0.464286	0.158383
495	494	CS_F	2022-02-17	14	1	1	0.3253
496	495	CS_F	2022-02-17	15	1	1.92857	0.563268
497	496	CS_F	2022-02-17	16	0	1.03571	0.302031
498	497	CS_F	2022-02-17	17	0	2.14286	0.870921
499	498	CS_F	2022-02-17	18	1	2.28571	0.887683
500	499	CS_F	2022-02-17	19	1	1	0.251976
501	500	CS_F	2022-02-17	20	1	1.28571	0.384409
502	501	CS_F	2022-02-17	21	0.5	0.785714	0.180806
503	502	CS_F	2022-02-17	22	1	1.10714	0.243102
504	503	CS_F	2022-02-17	23	0.5	1.28571	0.316467
505	504	CS_F	2022-02-17	24	0	1	0.281718
506	505	CS_F	2022-02-17	25	0	1.42857	0.591895
507	506	CS_F	2022-02-17	26	0	1.17857	0.391894
508	507	CS_F	2022-02-17	27	0	0.678571	0.19956
509	508	CS_F	2022-02-17	28	0.5	1.07143	0.363437
510	509	CS_F	2022-02-17	29	1	1.03571	0.227024
511	510	CS_F	2022-02-17	30	0	0.857143	0.328192
512	511	CS_F	2022-02-17	31	0	2.03571	0.891586
513	512	CS_F	2022-02-17	32	0.5	1.28571	0.384409
514	513	CS_F	2022-02-17	33	0	1.32143	0.527181
515	514	CS_F	2022-02-17	34	0	1	0.290957
516	515	CS_F	2022-02-17	35	0	0.642857	0.164383
517	516	CS_F	2022-02-17	36	1	0.821429	0.171004
518	517	CS_F	2022-02-17	37	1	1.03571	0.232778
519	518	CS_F	2022-02-17	38	0.5	1.53571	0.464286
520	519	CS_F	2022-02-17	39	0	0.571429	0.17388
521	520	CS_F	2022-02-17	40	0	0.571429	0.17388
522	521	CS_F	2022-02-17	41	0	0.678571	0.236003
523	522	CS_F	2022-02-17	42	0	0.571429	0.149325
524	523	CS_F	2022-02-17	43	1	1.53571	0.422521
525	524	CS_F	2022-02-17	44	0	0.857143	0.373438
526	525	CS_F	2022-02-17	45	1	1.21429	0.292576
527	526	CS_F	2022-02-17	46	1	1.03571	0.243878
528	527	CS_F	2022-02-17	47	0	1.10714	0.37915
529	528	CS_F	2022-02-17	48	1	1.53571	0.428737
530	529	CS_F	2022-02-17	49	0.5	1.10714	0.338606
531	530	CS_F	2022-02-17	50	1	1.17857	0.252257
532	531	CS_F	2022-02-17	51	0.5	1.71429	0.503578
533	532	CS_F	2022-02-17	52	0	0.571429	0.188482
534	533	CS_F	2022-02-17	53	1	1.14286	0.245134
535	534	CS_F	2022-02-17	54	0	1.35714	0.493916
536	535	CS_F	2022-02-17	55	0	1.32143	0.648673
537	536	CS_F	2022-02-17	56	0	0.464286	0.158383
538	537	CS_F	2022-02-17	57	0.5	1.82143	0.80352
539	538	CS_F	2022-02-17	58	0	0.928571	0.417629
540	539	CS_F	2022-02-17	59	0	0.464286	0.149798
541	540	CS_F	2022-02-17	60	0	1.17857	0.333546
542	541	CS_F	2022-02-17	61	0	1.07143	0.423917
543	542	CS_F	2022-02-17	62	0.5	1.14286	0.311653
544	543	CS_F	2022-02-17	63	0	0.678571	0.185831
545	544	CS_F	2022-02-17	64	0	0.535714	0.166525
546	545	CS_F	2022-02-17	65	0	1.14286	0.320029
547	546	CS_F	2022-02-17	66	0	1.5	0.756803
548	547	CS_F	2022-02-17	67	0	1.07143	0.30398
549	548	CS_F	2022-02-17	68	0	0.642857	0.193917
550	549	CS_F	2022-02-17	69	0.5	1.35714	0.544852
551	550	CS_F	2022-02-17	70	0	1.71429	0.993174
552	551	CS_F	2022-02-17	71	0	1	0.345033
553	552	CS_F	2022-02-17	72	0	0.714286	0.27147
554	553	CS_F	2022-02-17	73	0	0.464286	0.140691
555	554	CS_F	2022-02-17	74	0	0.964286	0.339164
556	555	CS_F	2022-02-17	75	0	0.464286	0.208815
557	556	CS_F	2022-02-17	76	0	1.07143	0.430112
558	557	CS_F	2022-02-17	77	0	1.39286	0.651289
559	558	CS_F	2022-02-17	78	0	0.642857	0.309524
560	559	CS_F	2022-02-17	79	0	0.892857	0.326677
561	560	CS_F	2022-02-17	80	0	0.714286	0.344485
562	561	CS_F	2022-02-17	81	0	0.535714	0.158383
563	562	CS_F	2022-02-17	82	0	0.571429	0.214726
564	563	CS_F	2022-02-17	83	0	1.57143	1.14021
565	564	CS_F	2022-02-17	84	0	0.607143	0.214175
566	565	CS_F	2022-02-17	85	0	0.642857	0.213402
567	566	CS_F	2022-02-17	86	0	0.714286	0.21735
568	567	CS_F	2022-02-17	87	0	0.928571	0.271818
569	568	CS_F	2022-02-17	88	0	1.89286	1.38333
570	569	CS_F	2022-02-17	89	0	1.14286	0.643885
571	570	CS_F	2022-02-17	90	0	0.928571	0.420785
572	571	CS_F	2022-02-17	91	0	1.14286	0.453424
573	572	CS_F	2022-02-17	92	0	0.928571	0.352349
574	573	CS_F	2022-02-17	93	0	0.857143	0.30738
575	574	CS_F	2022-02-17	94	0	0.821429	0.19956
576	575	CS_F	2022-02-17	95	0	0.357143	0.11745
577	576	CS_F	2022-02-17	96	0	0.607143	0.194768
578	577	CS_F	2022-02-17	97	0	0.642857	0.179758
579	578	CS_F	2022-02-17	98	0	1.39286	0.829897
580	579	CS_F	2022-02-17	99	0	0.821429	0.218542
581	580	CS_F	2022-02-17	100	0	0.321429	0.126549
582	581	CS_F	2022-02-17	101	0	0.571429	0.208475
583	582	CS_F	2022-02-17	102	0	2.67857	2.06703
584	583	CS_F	2022-02-17	103	0	0.392857	0.118849
585	584	CS_F	2022-02-17	104	0	0.392857	0.194768
586	585	CS_F	2022-02-17	105	0	0.428571	0.17388
587	586	CS_F	2022-02-17	106	0	1.78571	1.19452
588	587	CS_F	2022-02-17	107	0	0.535714	0.188857
589	588	CS_F	2022-02-17	108	0	1.14286	0.819269
590	589	CS_F	2022-02-17	109	0	0.928571	0.398172
591	590	CS_F	2022-02-17	110	0	1.03571	0.618246
592	591	CS_F	2022-02-17	111	0	1.28571	1.06639
593	592	CS_F	2022-02-17	112	0	1.57143	1.1745
594	593	CS_F	2022-02-17	113	0	1.17857	0.577473
595	594	CS_F	2022-02-17	114	0	0.785714	0.53787
596	595	CS_F	2022-02-17	115	0	1.39286	0.711469
597	596	CS_F	2022-02-17	116	0	0.428571	0.13041
598	597	CS_F	2022-02-17	117	0	0.321429	0.136602
599	598	CS_F	2022-02-17	118	0	2.89286	2.23745
600	599	CS_F	2022-02-17	119	0	0.928571	0.359779
601	600	CS_F	2022-02-17	120	0	0.964286	0.288593
602	601	CS_F	2022-02-17	121	0	0.857143	0.289655
603	602	CS_F	2022-02-17	122	0	0.964286	0.481076
604	603	CS_F	2022-02-17	123	0	0.5	0.288675
605	604	CS_F	2022-02-17	124	0	0.392857	0.157185
606	605	CS_F	2022-02-17	125	0	0.714286	0.397935
607	606	CS_F	2022-02-17	126	0	0.678571	0.471555
608	607	CS_F	2022-02-17	127	0	0.892857	0.357606
609	608	CS_F	2022-02-17	128	0	0.464286	0.283973
610	609	CS_F	2022-02-17	129	0	0.75	0.327832
611	610	CS_F	2022-02-17	130	0	0.928571	0.439241
612	611	CS_F	2022-02-17	131	0	0.285714	0.134687
613	612	CS_F	2022-02-17	132	0	0.464286	0.208815
614	613	CS_F	2022-02-17	133	0	0.321429	0.126549
615	614	CS_F	2022-02-17	134	0	0.928571	0.295148
616	615	CS_F	2022-02-17	135	0	1.14286	0.769309
617	616	CS_F	2022-02-17	136	0	0.464286	0.208815
618	617	CS_F	2022-02-17	137	0	0.5	0.221228
619	618	CS_F	2022-02-17	138	0	1	0.482498
620	619	CS_F	2022-02-17	139	0	0.535714	0.232778
621	620	CS_F	2022-02-17	140	0	0.535714	0.166525
622	621	CS_F	2022-02-17	141	0	1.5	0.641386
623	622	CS_F	2022-02-17	142	0	0.642857	0.225458
624	623	CS_F	2022-02-17	143	0	0.392857	0.187854
625	624	CS_F	2022-02-17	144	0	0.285714	0.101015
626	625	CS_F	2022-02-17	145	0	0.392857	0.180675
627	626	CS_F	2022-02-17	146	0	1.60714	0.692628
628	627	CS_F	2022-02-17	147	0	2.21429	1.32971
629	628	CS_F	2022-02-17	148	0	1.03571	0.641349
630	629	CS_F	2022-02-17	149	0	1.10714	0.512643
631	630	CS_F	2022-02-17	150	0	1.60714	0.882426
632	631	CS_F	2022-02-17	151	0	0.821429	0.411648
633	632	CS_F	2022-02-17	152	0	0.392857	0.201445
634	633	CS_F	2022-02-17	153	0	0.285714	0.101015
635	634	CS_F	2022-02-17	154	0	0.964286	0.489255
636	635	CS_F	2022-02-17	155	0	0.178571	0.089879
637	636	CS_F	2022-02-17	156	0	0.178571	0.103555
638	637	CS_F	2022-02-17	157	0	0.607143	0.248484
639	638	CS_F	2022-02-17	158	0	0.464286	0.293141
640	639	CS_F	2022-02-17	159	0	0.5	0.208928
641	640	CS_F	2022-02-17	160	0	0.321429	0.163085
642	641	CS_F	2022-02-17	161	0	0.321429	0.126549
643	642	CS_F	2022-02-17	162	0	1.32143	0.826245
644	643	CS_F	2022-02-17	163	0	1.25	0.453163
645	644	CS_F	2022-02-17	164	0	0.642857	0.338118
646	645	CS_F	2022-02-17	165	0	0.428571	0.202031
647	646	CS_F	2022-02-17	166	0	0.5	0.221228
648	647	CS_F	2022-02-17	167	0	1.82143	1.03004
649	648	CS_F	2022-02-17	168	0	0.5	0.232879
650	649	CS_F	2022-02-17	169	0	0.392857	0.180675
651	650	CS_F	2022-02-17	170	0	0.357143	0.258272
652	651	CS_F	2022-02-17	171	0	1.07143	0.72908
653	652	CS_F	2022-02-17	172	0	1.42857	0.761905
654	653	CS_F	2022-02-17	173	0	0.142857	0.0847387
655	654	CS_F	2022-02-17	174	0	0.642857	0.300855
656	655	CS_F	2022-02-17	175	0	1.10714	0.483427
657	656	CS_F	2022-02-17	176	0	0.75	0.400479
658	657	CS_F	2022-02-17	177	0	1.28571	0.75217
659	658	CS_F	2022-02-17	178	0	0.321429	0.145965
660	659	CS_F	2022-02-17	179	0	0.321429	0.154762
661	660	CS_F	2022-02-17	180	0	0.607143	0.37915
662	661	CS_F	2022-02-17	181	0	1.42857	0.765369
663	662	CS_F	2022-02-17	182	0	0.678571	0.37109
664	663	CS_F	2022-02-17	183	0	0.821429	0.37109
665	664	CS_F	2022-02-17	184	0	0.892857	0.499575
666	665	CS_F	2022-02-17	185	0	0.928571	0.442242
667	666	CS_F	2022-02-17	186	0	1.71429	0.827531
668	667	CS_F	2022-02-17	187	0	0.857143	0.340068
669	668	CS_F	2022-02-17	188	0	0.678571	0.325518
670	669	CS_F	2022-02-17	189	0	0.357143	0.179758
671	670	CS_F	2022-02-17	190	0	0.75	0.275186
672	671	CS_F	2022-02-17	191	0	0.464286	0.25964
673	672	CS_F	2022-02-17	192	0	0.25	0.110614
674	673	CS_F	2022-02-17	193	0	0.75	0.369559
675	674	CS_F	2022-02-17	194	0	0.892857	0.415759
676	675	CS_F	2022-02-17	195	0	0.428571	0.269374
677	676	CS_F	2022-02-17	196	0	0.5	0.166667
678	677	CS_F	2022-02-17	197	0	0.571429	0.238095
679	678	CS_F	2022-02-17	198	0	1	0.427247
680	679	CS_F	2022-02-17	199	0	0.5	0.188982
681	680	CS_F	2022-02-17	200	0	0.678571	0.28197
682	681	CS_F	2022-02-17	201	0	0.357143	0.179758
683	682	CS_F	2022-02-17	202	0	1	0.404995
684	683	CS_F	2022-02-17	203	0	1.10714	0.547576
685	684	CS_F	2022-02-17	204	0	0.25	0.0979283
686	685	CS_F	2022-02-17	205	0	0.357143	0.13815
687	686	CS_F	2022-02-17	206	0	1.32143	0.729306
688	687	CS_F	2022-02-17	207	0	0.785714	0.382685
689	688	CS_F	2022-02-17	208	0	0.25	0.151054
690	689	CS_F	2022-02-17	209	0	0.321429	0.185831
691	690	CS_F	2022-02-17	210	0	1.10714	0.861184
692	691	CS_F	2022-02-17	211	0	0.285714	0.204817
693	692	CS_F	2022-02-17	212	0	1.10714	0.598365
694	693	CS_F	2022-02-17	213	0	0.285714	0.134687
695	694	CS_F	2022-02-17	214	0	0.821429	0.479896
696	695	CS_F	2022-02-17	215	0	0.392857	0.292496
697	696	CS_F	2022-02-17	216	0	0.142857	0.0847387
698	697	CS_F	2022-02-17	217	0	0.892857	0.361285
699	698	CS_F	2022-02-17	218	0	1.71429	1.11609
700	699	CS_F	2022-02-17	219	0	1.78571	1.12964
701	700	CS_F	2022-02-17	220	0	0.285714	0.144174
702	701	CS_F	2022-02-17	221	0	0.785714	0.653353
703	702	CS_F	2022-02-17	222	0	0	0
704	703	CS_F	2022-02-17	223	0	0.392857	0.22619
705	704	CS_F	2022-02-17	224	0	0.428571	0.195374
706	705	CS_F	2022-02-17	225	0	0.642857	0.231251
707	706	CS_F	2022-02-17	226	0	0.25	0.121988
708	707	CS_F	2022-02-17	227	0	0.464286	0.243878
709	708	CS_F	2022-02-17	228	0	0.392857	0.22619
710	709	CS_F	2022-02-17	229	0	0.321429	0.224513
711	710	CS_F	2022-02-17	230	0	0.607143	0.258911
712	711	CS_F	2022-02-17	231	0	0.964286	0.62251
713	712	CS_F	2022-02-17	232	0	0.464286	0.174287
714	713	CS_F	2022-02-17	233	0	0.142857	0.0847387
715	714	CS_F	2022-02-17	234	0	0.821429	0.418025
716	715	CS_F	2022-02-17	235	0	0.964286	0.589777
717	716	CS_F	2022-02-17	236	0	0.178571	0.103555
718	717	CS_F	2022-02-17	237	0	0.142857	0.142857
719	718	CS_F	2022-02-17	238	0	0.285714	0.191466
720	719	CS_F	2022-02-17	239	0	0.75	0.36233
721	720	CS_F	2022-02-17	240	0	0.821429	0.325518
722	721	CS_F	2022-02-17	241	0	0.285714	0.134687
723	722	CS_F	2022-02-17	242	0	0.678571	0.333546
724	723	CS_F	2022-02-17	243	0	0.785714	0.273896
725	724	CS_F	2022-02-17	244	0	0.321429	0.257448
726	725	CS_F	2022-02-17	245	0	0.357143	0.13815
727	726	CS_F	2022-02-17	246	0	0.678571	0.325518
728	727	CS_F	2022-02-17	247	0	0.571429	0.248959
729	728	CS_F	2022-02-17	248	0	0.75	0.526104
730	729	CS_F	2022-02-17	249	0	0.75	0.343592
731	730	CS_F	2022-02-17	250	0	0.571429	0.502451
732	731	CS_F	2022-02-17	251	0	0.75	0.339721
733	732	CS_F	2022-02-17	252	0	0.392857	0.207908
734	733	CS_F	2022-02-17	253	0	0.464286	0.243878
735	734	CS_F	2022-02-17	254	0	0.392857	0.187854
736	735	CS_F	2022-02-17	255	0	0.178571	0.103555
737	736	CS_F	2022-02-17	256	0	0.25	0.0979283
738	737	CS_F	2022-02-17	257	0	0.571429	0.243587
739	738	CS_F	2022-02-17	258	0	0.0714286	0.0714286
740	739	CS_F	2022-02-17	259	0	0.928571	0.377714
741	740	CS_F	2022-02-17	260	0	0.285714	0.161484
742	741	CS_F	2022-02-17	261	0	0.25	0.110614
743	742	CS_F	2022-02-17	262	0	0.857143	0.462093
744	743	CS_F	2022-02-17	263	0	0.392857	0.201445
745	744	CS_F	2022-02-17	264	0	0.214286	0.14869
746	745	CS_F	2022-02-17	265	0	0.464286	0.202381
747	746	CS_F	2022-02-17	266	0	0.5	0.243975
748	747	CS_F	2022-02-17	267	0	0.857143	0.289655
749	748	CS_F	2022-02-17	268	0	0.464286	0.269637
750	749	CS_F	2022-02-17	269	0	0.964286	0.538178
751	750	CS_F	2022-02-17	270	0	0.321429	0.145965
752	751	CS_F	2022-02-17	271	0	0.285714	0.153074
753	752	CS_F	2022-02-17	272	0	0.357143	0.225458
754	753	CS_F	2022-02-17	273	0	0.357143	0.225458
755	754	CS_F	2022-02-17	274	0	0.357143	0.179758
756	755	CS_F	2022-02-17	275	0	0.25	0.159571
757	756	CS_F	2022-02-17	276	0	0.178571	0.103555
758	757	CS_F	2022-02-17	277	0	0.357143	0.213402
759	758	CS_F	2022-02-17	278	0	0.0357143	0.0357143
760	759	CS_F	2022-02-17	279	0	0.178571	0.126549
761	760	CS_F	2022-02-17	280	0	0.0714286	0.0714286
762	761	CS_F	2022-02-17	281	0	0.5	0.331343
763	762	CS_F	2022-02-17	282	0	0.357143	0.179758
764	763	CS_F	2022-02-17	283	0	0.607143	0.27381
765	764	CS_F	2022-02-17	284	0	0.464286	0.195736
766	765	CS_F	2022-02-17	285	0	0.142857	0.0847387
767	766	CS_F	2022-02-17	286	0	0.357143	0.200623
768	767	CS_F	2022-02-17	287	0	0.285714	0.144174
769	768	CS_F	2022-02-17	288	0	0.5	0.335312
770	769	CS_F	2022-02-17	289	0	0.892857	0.334677
771	770	CS_F	2022-02-17	290	0	0.142857	0.142857
772	771	CS_F	2022-02-17	291	0	0.178571	0.089879
773	772	CS_F	2022-02-17	292	0	0.214286	0.129684
774	773	CS_F	2022-02-17	293	0	0.464286	0.269637
775	774	CS_F	2022-02-17	294	0	0.392857	0.292496
776	775	CS_F	2022-02-17	295	0	0.464286	0.254495
777	776	CS_F	2022-02-17	296	0	0.607143	0.248484
778	777	CS_F	2022-02-17	297	0	0.142857	0.0847387
779	778	CS_F	2022-02-17	298	0	0.428571	0.254216
780	779	CS_F	2022-02-17	299	0	0.392857	0.253751
781	780	CS_F	2022-02-17	300	0	0.392857	0.357606
782	781	CS_F	2022-02-17	301	0	0.464286	0.243878
783	782	CS_F	2022-02-17	302	0	0.107143	0.0595238
784	783	CS_F	2022-02-17	303	0	0.5	0.361873
785	784	CS_F	2022-02-17	304	0	0.535714	0.327255
786	785	CS_F	2022-02-17	305	0	0.0357143	0.0357143
787	786	CS_F	2022-02-17	306	0	0.392857	0.187854
788	787	CS_F	2022-02-17	307	0	0.464286	0.232778
789	788	CS_F	2022-02-17	308	0	0.464286	0.335241
790	789	CS_F	2022-02-17	309	0	0.428571	0.232473
791	790	CS_F	2022-02-17	310	0	0.142857	0.099127
792	791	CS_F	2022-02-17	311	0	0.178571	0.115625
793	792	CS_F	2022-02-17	312	0	0.285714	0.144174
794	793	CS_F	2022-02-17	313	0	0.178571	0.126549
795	794	CS_F	2022-02-17	314	0	0.357143	0.200623
796	795	CS_F	2022-02-17	315	0	0.928571	0.490461
797	796	CS_F	2022-02-17	316	0	2.39286	1.23157
798	797	CS_F	2022-02-17	317	0	0.964286	0.335241
799	798	CS_F	2022-02-17	318	0	0.928571	0.572585
800	799	CS_F	2022-02-17	319	0	0.428571	0.232473
801	800	CS_F	2022-02-17	320	0	1.32143	0.877487
802	801	CS_F	2022-02-17	321	0	0.107143	0.107143
803	802	CS_F	2022-02-17	322	0	0.571429	0.301796
804	803	CS_F	2022-02-17	323	0	0.25	0.151054
805	804	CS_F	2022-02-17	324	0	0.25	0.132388
806	805	CS_F	2022-02-17	325	0	0.214286	0.129684
807	806	CS_F	2022-02-17	326	0	0.392857	0.187854
808	807	CS_F	2022-02-17	327	0	0.642857	0.457779
809	808	CS_F	2022-02-17	328	0	0.928571	0.439241
810	809	CS_F	2022-02-17	329	0	0.392857	0.207908
811	810	CS_F	2022-02-17	330	0	0.321429	0.236003
812	811	CS_F	2022-02-17	331	0	0.428571	0.226712
813	812	CS_F	2022-02-17	332	0	0.714286	0.423694
814	813	CS_F	2022-02-17	333	0	0.464286	0.195736
815	814	CS_F	2022-02-17	334	0	0.214286	0.129684
816	815	CS_F	2022-02-17	335	0	0.714286	0.299281
817	816	CS_F	2022-02-17	336	0	0.357143	0.207111
818	817	CS_F	2022-02-17	337	0	0.392857	0.187854
819	818	CS_F	2022-02-17	338	0	0.321429	0.136602
820	819	CS_F	2022-02-17	339	0	0.571429	0.269374
821	820	CS_F	2022-02-17	340	0	0.857143	0.538748
822	821	CS_F	2022-02-17	341	0	0.642857	0.449027
823	822	CS_F	2022-02-17	342	0	0.285714	0.21735
824	823	CS_F	2022-02-17	343	0	0.821429	0.430496
825	824	CS_F	2022-02-17	344	0	0.321429	0.224513
826	825	CS_F	2022-02-17	345	0	0.428571	0.2208
827	826	CS_F	2022-02-17	346	0	0.178571	0.115625
828	827	CS_F	2022-02-17	347	0	0.571429	0.2208
829	828	CS_F	2022-02-17	348	0	1.10714	0.530397
830	829	CS_F	2022-02-17	349	0	0.5	0.227128
831	830	CS_F	2022-02-17	350	0	0.142857	0.0673435
832	831	CS_F	2022-02-17	351	0	0.25	0.159571
833	832	CS_F	2022-02-17	352	0	0.321429	0.126549
834	833	CS_F	2022-02-17	353	0	0.142857	0.0847387
835	834	CS_F	2022-02-17	354	0	0.392857	0.187854
836	835	CS_F	2022-02-17	355	0	0.285714	0.134687
837	836	CS_F	2022-02-17	356	0	0.678571	0.329556
838	837	CS_F	2022-02-17	357	0	0.607143	0.346331
839	838	CS_F	2022-02-17	358	0	0.357143	0.156129
840	839	CS_F	2022-02-17	359	0	0.607143	0.253751
841	840	CS_F	2022-02-17	360	0	0.357143	0.172242
842	841	CS_F	2022-02-17	361	0	0.535714	0.25964
843	842	CS_F	2022-02-17	362	0	0.857143	0.487175
844	843	CS_F	2022-02-17	363	0	0.392857	0.214175
845	844	CS_F	2022-02-17	364	0	0.464286	0.249243
846	845	CS_F	2022-02-17	365	0	0.535714	0.264686
847	846	CS_F	2022-02-17	366	0	0.321429	0.145965
848	847	CS_F	2022-02-17	367	0	0.821429	0.325518
849	848	CS_F	2022-02-17	368	0	0.392857	0.201445
850	849	CS_F	2022-02-17	369	0	0.357143	0.172242
851	850	CS_F	2022-02-17	370	0	0.464286	0.195736
852	851	CS_F	2022-02-17	371	0	1.21429	0.653353
853	852	CS_F	2022-02-17	372	0	0.107143	0.0786676
854	853	CS_F	2022-02-17	373	0	0.428571	0.226712
855	854	CS_F	2022-02-17	374	0	0.285714	0.113356
856	855	CS_F	2022-02-17	375	0	0.5	0.195857
857	856	CS_F	2022-02-17	376	0	1	0.604218
858	857	CS_F	2022-02-17	377	0	1.60714	1.25181
859	858	CS_F	2022-02-17	378	0	0.642857	0.466367
860	859	CS_F	2022-02-17	379	0	1.32143	0.63632
861	860	CS_F	2022-02-17	380	0	0.75	0.5082
862	861	CS_F	2022-02-17	381	0	0.285714	0.191466
863	862	CS_F	2022-02-17	382	0	0.5	0.361873
864	863	CS_F	2022-02-17	383	0	0.607143	0.364928
865	864	CS_F	2022-02-17	384	0	0.535714	0.264686
866	865	CS_F	2022-02-17	385	0	0.428571	0.188482
867	866	CS_F	2022-02-17	386	0	0.357143	0.200623
868	867	CS_F	2022-02-17	387	0	0.392857	0.180675
869	868	CS_F	2022-02-17	388	0	0.75	0.429177
870	869	CS_F	2022-02-17	389	0	0.321429	0.178571
871	870	CS_F	2022-02-17	390	0	0.428571	0.288348
872	871	CS_F	2022-02-17	391	0	0.607143	0.305762
873	872	CS_F	2022-02-17	392	0	0.25	0.151054
874	873	CS_F	2022-02-17	393	0	0.642857	0.449027
875	874	CS_F	2022-02-17	394	0	0.285714	0.21735
876	875	CS_F	2022-02-17	395	0	0.785714	0.679163
877	876	CS_F	2022-02-17	396	0	0.607143	0.314295
878	877	CS_F	2022-02-17	397	0	0.607143	0.310058
879	878	CS_F	2022-02-17	398	0	1.35714	0.974835
880	879	CS_F	2022-02-17	399	0	0.25	0.159571
881	880	CS_F	2022-02-17	400	0	0.178571	0.115625
882	881	CS_F	2022-02-17	401	0	0.428571	0.269374
883	882	CS_F	2022-02-17	402	0	0.178571	0.126549
884	883	CS_F	2022-02-17	403	0	0.0714286	0.0495635
885	884	CS_F	2022-02-17	404	0	0.535714	0.319068
886	885	CS_F	2022-02-17	405	0	0.25	0.182755
887	886	CS_F	2022-02-17	406	0	0.178571	0.103555
888	887	CS_F	2022-02-17	407	0	0.0357143	0.0357143
889	888	CS_F	2022-02-17	408	0	0.285714	0.17711
890	889	CS_F	2022-02-17	409	0	0.214286	0.107363
891	890	CS_F	2022-02-17	410	0	0.464286	0.221121
892	891	CS_F	2022-02-17	411	0	0.214286	0.119048
893	892	CS_F	2022-02-17	412	0	0.321429	0.154762
894	893	CS_F	2022-02-17	413	0	0.107143	0.107143
895	894	CS_F	2022-02-17	414	0	0.178571	0.103555
896	895	CS_F	2022-02-17	415	0	0.785714	0.409404
897	896	CS_F	2022-02-17	416	0	0.214286	0.129684
898	897	CS_F	2022-02-17	417	0	0.214286	0.107363
899	898	CS_F	2022-02-17	418	0	0.392857	0.180675
900	899	CS_F	2022-02-17	419	0	0.142857	0.099127
901	900	CS_F	2022-02-17	420	0	0.571429	0.350467
902	901	CS_F	2022-02-17	421	0	0.178571	0.103555
903	902	CS_F	2022-02-17	422	0	0.464286	0.195736
904	903	CS_F	2022-02-17	423	0	0.357143	0.179758
905	904	CS_F	2022-02-17	424	0	1.28571	0.906848
906	905	CS_F	2022-02-17	425	0	0.714286	0.543984
907	906	CS_F	2022-02-17	426	0	0.285714	0.191466
908	907	CS_F	2022-02-17	427	0	0.25	0.121988
909	908	CS_F	2022-02-17	428	0	0	0
910	909	CS_F	2022-02-17	429	0	0.535714	0.297619
911	910	CS_F	2022-02-17	430	0	0.214286	0.119048
912	911	CS_F	2022-02-17	431	0	0.107143	0.107143
913	912	CS_F	2022-02-17	432	0	0.607143	0.440476
914	913	CS_F	2022-02-17	433	0	0.107143	0.0786676
915	914	CS_F	2022-02-17	434	0	0.142857	0.0847387
916	915	CS_F	2022-02-17	435	0	0.178571	0.145965
917	916	CS_F	2022-02-17	436	0	0.178571	0.145965
918	917	CS_F	2022-02-17	437	0	0.214286	0.214286
919	918	CS_F	2022-02-17	438	0	0.178571	0.115625
920	919	CS_F	2022-02-17	439	0	0.464286	0.464286
921	920	CS_F	2022-02-17	440	0	0.107143	0.0786676
922	921	CS_F	2022-02-17	441	0	0.178571	0.103555
923	922	CS_F	2022-02-17	442	0	0	0
924	923	CS_F	2022-02-17	443	0	0.178571	0.126549
925	924	CS_F	2022-02-17	444	0	0.75	0.416667
926	925	CS_F	2022-02-17	445	0	0.25	0.110614
927	926	CS_F	2022-02-17	446	0	0.214286	0.119048
928	927	CS_F	2022-02-17	447	0	1.25	1.14391
929	928	CS_F	2022-02-17	448	0	0.357143	0.156129
930	929	CS_F	2022-02-17	449	0	0.142857	0.0847387
931	930	CS_F	2022-02-17	450	0	0.428571	0.208475
932	931	CS_F	2022-02-17	451	0	0.357143	0.253099
933	932	CS_F	2022-02-17	452	0	0.285714	0.184428
934	933	CS_F	2022-02-17	453	0	0.321429	0.136602
935	934	CS_F	2022-02-17	454	0	0.857143	0.473405
936	935	CS_F	2022-02-17	455	0	0.285714	0.161484
937	936	CS_F	2022-02-17	456	0	0.25	0.159571
938	937	CS_F	2022-02-17	457	0	0.428571	0.393158
939	938	CS_F	2022-02-17	458	0	0.214286	0.180806
940	939	CS_F	2022-02-17	459	0	0.142857	0.0847387
941	940	CS_F	2022-02-17	460	0	0.0357143	0.0357143
942	941	CS_F	2022-02-17	461	0	0.178571	0.103555
943	942	CS_F	2022-02-17	462	0	0	0
944	943	CS_F	2022-02-17	463	0	0.178571	0.089879
945	944	CS_F	2022-02-17	464	0	0.321429	0.224513
946	945	CS_F	2022-02-17	465	0	0.714286	0.465353
947	946	CS_F	2022-02-17	466	0	1.25	0.791197
948	947	CS_F	2022-02-17	467	0	0.75	0.339721
949	948	CS_F	2022-02-17	468	0	0.928571	0.63606
950	949	CS_F	2022-02-17	469	0	0.928571	0.793373
951	950	CS_F	2022-02-17	470	0	0.142857	0.0847387
952	951	CS_F	2022-02-17	471	0	0.678571	0.537123
953	952	CS_F	2022-02-17	472	0	1.10714	0.589456
954	953	CS_F	2022-02-17	473	0	1.39286	0.946085
955	954	CS_F	2022-02-17	474	0	1.21429	0.861212
956	955	CS_F	2022-02-17	475	0	0.714286	0.426804
957	956	CS_F	2022-02-17	476	0	0.25	0.121988
958	957	CS_F	2022-02-17	477	0	0.25	0.151054
959	958	CS_F	2022-02-17	478	0	1.03571	0.416213
960	959	CS_F	2022-02-17	479	0	0.607143	0.296983
961	960	CS_F	2022-02-17	480	0	0.5	0.221228
962	961	CS_F	2022-02-17	481	0	0.357143	0.128218
963	962	CS_F	2022-02-17	482	0	0.714286	0.401245
964	963	CS_F	2022-02-17	483	0	0.428571	0.166099
965	964	CS_F	2022-02-17	484	0	0.321429	0.136602
966	965	CS_F	2022-02-17	485	0	0.821429	0.584304
967	966	CS_F	2022-02-17	486	0	0.214286	0.107363
968	967	CS_F	2022-02-17	487	0	0.678571	0.325518
969	968	CS_F	2022-02-17	488	0	0.714286	0.42056
970	969	CS_F	2022-02-17	489	0	0.607143	0.305762
971	970	CS_F	2022-02-17	490	0	0.785714	0.292576
972	971	CS_F	2022-02-17	491	0	0.464286	0.181718
973	972	CS_F	2022-02-17	492	0	0.75	0.327832
974	973	CS_F	2022-02-17	493	0	0.571429	0.264418
975	974	CS_F	2022-02-17	494	0	1.28571	0.558383
976	975	CS_F	2022-02-17	495	0	0.75	0.265399
977	976	CS_F	2022-02-17	496	0	0.714286	0.380952
978	977	CS_F	2022-02-17	497	0	0.642857	0.253099
979	978	CS_F	2022-02-17	498	0	0.357143	0.128218
980	979	CS_F	2022-02-17	499	0	2.03571	1.08925
981	980	CS_F	2022-02-17	500	0	1	0.716399
982	981	CS_F	2022-02-17	501	0	1.75	1.03206
983	982	CS_F	2022-02-17	502	0	0.964286	0.302031
984	983	CS_F	2022-02-17	503	0	0.678571	0.257448
985	984	CS_F	2022-02-17	504	0	0.464286	0.208815
986	985	CS_F	2022-02-17	505	0	0.285714	0.134687
987	986	CS_F	2022-02-17	506	0	0.571429	0.327038
988	987	CS_F	2022-02-17	507	0	0.642857	0.242421
989	988	CS_F	2022-02-17	508	0	0.571429	0.379461
990	989	CS_F	2022-02-17	509	0	0.321429	0.145965
991	990	CS_F	2022-02-17	510	0	0.785714	0.305839
992	991	CS_F	2022-02-17	511	0	1	0.448395
993	992	CS_F	2022-02-17	512	0	0.392857	0.258911
994	993	CS_F	2022-02-17	513	0	0.571429	0.346672
995	994	CS_F	2022-02-17	514	0	0.964286	0.306379
996	995	CS_F	2022-02-17	515	0	0.714286	0.211177
997	996	CS_F	2022-02-17	516	0	0.178571	0.089879
998	997	CS_F	2022-02-17	517	0	0.5	0.297698
999	998	CS_F	2022-02-17	518	0	0.571429	0.379461
1000	999	CS_F	2022-02-17	519	0	0.285714	0.124479
1001	1000	CS_F	2022-02-17	520	0	0.428571	0.214726
1002	1001	CS_F	2022-02-17	521	0	0.5	0.202498
1003	1002	CS_F	2022-02-17	522	0	0.321429	0.163085
1004	1003	CS_F	2022-02-17	523	0	0.0357143	0.0357143
1005	1004	CS_F	2022-02-17	524	0	0.214286	0.129684
1006	1005	CS_F	2022-02-17	525	0	0.428571	0.188482
1007	1006	CS_F	2022-02-17	526	0	0.821429	0.341385
1008	1007	CS_F	2022-02-17	527	0	0.821429	0.785203
1009	1008	CS_F	2022-02-17	528	0	1.82143	1.02489
1010	1009	CS_F	2022-02-17	529	0	1.5	0.739119
1011	1010	CS_F	2022-02-17	530	0	0.785714	0.338676
1012	1011	CS_F	2022-02-17	531	0	0.821429	0.304523
1013	1012	CS_F	2022-02-17	532	0	0.392857	0.187854
1014	1013	CS_F	2022-02-17	533	0	0.607143	0.201445
1015	1014	CS_F	2022-02-17	534	0	0.571429	0.232473
1016	1015	CS_F	2022-02-17	535	0	0.714286	0.266553
1017	1016	CS_F	2022-02-17	536	0	0.821429	0.23033
1018	1017	CS_F	2022-02-17	537	0	0.928571	0.246288
1019	1018	CS_F	2022-02-17	538	0	2.17857	1.22048
1020	1019	CS_F	2022-02-17	539	0	1.5	0.919368
1021	1020	CS_F	2022-02-17	540	0	0.928571	0.3083
1022	1021	CS_F	2022-02-17	541	0	1.39286	0.542723
1023	1022	CS_F	2022-02-17	542	0	0.464286	0.215056
1024	1023	CS_F	2022-02-17	543	0	0.428571	0.259367
1025	1024	CS_F	2022-02-17	544	0	0.678571	0.337488
1026	1025	CS_F	2022-02-17	545	0	0.178571	0.103555
1027	1026	CS_F	2022-02-17	546	0	0.464286	0.227024
1028	1027	CS_F	2022-02-17	547	0	1.46429	0.499953
1029	1028	CS_F	2022-02-17	548	0	0.821429	0.300148
1030	1029	CS_F	2022-02-17	549	0	1.21429	0.515262
1031	1030	CS_F	2022-02-17	550	0	0.785714	0.334748
1032	1031	CS_F	2022-02-17	551	0	0.964286	0.238393
1033	1032	CS_F	2022-02-17	552	0	0.535714	0.188857
1034	1033	CS_F	2022-02-17	553	0	0.75	0.244652
1035	1034	CS_F	2022-02-17	554	0	0.571429	0.188482
1036	1035	CS_F	2022-02-17	555	0	0.785714	0.278683
1037	1036	CS_F	2022-02-17	556	0	0.285714	0.101015
1038	1037	CS_F	2022-02-17	557	0	0.392857	0.148531
1039	1038	CS_F	2022-02-17	558	0	0.5	0.202498
1040	1039	CS_F	2022-02-17	559	0	0.964286	0.386554
1041	1040	CS_F	2022-02-17	560	0	0.75	0.327832
1042	1041	CS_F	2022-02-17	561	0	0.321429	0.163085
1043	1042	CS_F	2022-02-17	562	0	0.857143	0.303046
1044	1043	CS_F	2022-02-17	563	0	1.10714	0.461018
1045	1044	CS_F	2022-02-17	564	0	1.32143	0.652739
1046	1045	CS_F	2022-02-17	565	0	0.821429	0.542026
1047	1046	CS_F	2022-02-17	566	0	0.5	0.149956
1048	1047	CS_F	2022-02-17	567	0	1	0.381448
1049	1048	CS_F	2022-02-17	568	0	0.75	0.25
1050	1049	CS_F	2022-02-17	569	0	1.53571	0.573862
1051	1050	CS_F	2022-02-17	570	0.5	1.57143	0.559735
1052	1051	CS_F	2022-02-17	571	1	1.60714	0.422074
1053	1052	CS_F	2022-02-17	572	0	0.5	0.140859
1054	1053	CS_F	2022-02-17	573	0	1.57143	1.03181
1055	1054	CS_F	2022-02-17	574	0	1.21429	0.399594
1056	1055	CS_F	2022-02-17	575	0	0.571429	0.274241
1057	1056	CS_F	2022-02-17	576	0	0.785714	0.26406
1058	1057	CS_F	2022-02-17	577	0	1.82143	0.729306
1059	1058	CS_F	2022-02-17	578	0	0.678571	0.236003
1060	1059	CS_F	2022-02-17	579	0.5	1.5	0.58305
1061	1060	CS_F	2022-02-17	580	0	0.428571	0.166099
1062	1061	CS_F	2022-02-17	581	0	0.821429	0.304523
1063	1062	CS_F	2022-02-17	582	0	1.07143	0.539274
1064	1063	CS_F	2022-02-17	583	0	0.964286	0.475545
1065	1064	CS_F	2022-02-17	584	1	2.25	0.719393
1066	1065	CS_F	2022-02-17	585	0.5	1.39286	0.386064
1067	1066	CS_F	2022-02-17	586	0	0.857143	0.270773
1068	1067	CS_F	2022-02-17	587	0	1	0.276983
1069	1068	CS_F	2022-02-17	588	0	0.75	0.182755
1070	1069	CS_F	2022-02-17	589	1	1.35714	0.26832
1071	1070	CS_F	2022-02-17	590	0.5	0.821429	0.185831
1072	1071	CS_F	2022-02-17	591	1	1.21429	0.326749
1073	1072	CS_F	2022-02-17	592	0.5	1	0.262265
1074	1073	CS_F	2022-02-17	593	0	0.821429	0.241543
1075	1074	CS_F	2022-02-17	594	0	1.21429	0.522907
1076	1075	CS_F	2022-02-17	595	0	1.5	0.589817
1077	1076	CS_F	2022-02-17	596	0	1.32143	0.597733
1078	1077	CS_F	2022-02-17	597	0	0.857143	0.255698
1079	1078	CS_F	2022-02-17	598	0	0.678571	0.192818
1080	1079	CS_F	2022-02-17	599	0	0.75	0.239184
1081	1080	CS_F	2022-02-17	600	0	0.75	0.227855
1082	1081	CS_F	2022-02-17	601	0	0.714286	0.211177
1083	1082	CS_F	2022-02-17	602	0	1.07143	0.340901
1084	1083	CS_F	2022-02-17	603	0	0.5	0.202498
1085	1084	CS_F	2022-02-17	604	0	0.75	0.189855
1086	1085	CS_F	2022-02-17	605	0.5	0.785714	0.208021
1087	1086	CS_F	2022-02-17	606	0	0.571429	0.166099
1088	1087	CS_F	2022-02-17	607	0	1	0.30429
1089	1088	CS_F	2022-02-17	608	0	0.785714	0.253844
1090	1089	CS_F	2022-02-17	609	0	1.10714	0.346331
1091	1090	CS_F	2022-02-17	610	0	1.17857	0.465911
1092	1091	CS_F	2022-02-17	611	1	2.14286	0.565111
1093	1092	CS_F	2022-02-17	612	1	2.46429	0.775761
1094	1093	CS_F	2022-02-17	613	1	1.75	0.787846
1095	1094	CS_F	2022-02-17	614	1	1.35714	0.440101
1096	1095	CS_F	2022-02-17	615	1	1.57143	0.455503
1097	1096	CS_F	2022-02-17	616	0	0.535714	0.130952
1098	1097	CS_F	2022-02-17	617	0	0.892857	0.301404
1099	1098	CS_F	2022-02-17	618	1	1.82143	0.754271
1100	1099	CS_F	2022-02-17	619	1.5	1.21429	0.226295
1101	1100	CS_F	2022-02-17	620	0	0.821429	0.28197
1102	1101	CS_F	2022-02-17	621	0	0.535714	0.195736
1103	1102	CS_F	2022-02-17	622	1	1.71429	0.516544
1104	1103	CS_F	2022-02-17	623	1	1.5	0.452798
1105	1104	CS_F	2022-02-17	624	1	1.17857	0.28197
1106	1105	CS_F	2022-02-17	625	1	2.53571	1.45158
1107	1106	CS_F	2022-02-17	626	0	1.03571	0.569234
1108	1107	CS_F	2022-02-17	627	0	0.857143	0.255698
1109	1108	CS_F	2022-02-17	628	0	0.821429	0.224513
1110	1109	CS_F	2022-02-17	629	1	1.60714	0.39621
1111	1110	CS_F	2022-02-17	630	1	1.53571	0.530753
1112	1111	CS_F	2022-02-17	631	1	2.85714	1.2907
1113	1112	CS_F	2022-02-17	632	1.5	1.96429	0.393338
1114	1113	CS_F	2022-02-17	633	1	1.60714	0.263971
1115	1114	CS_F	2022-02-17	634	1	1.03571	0.227024
1116	1115	CS_F	2022-02-17	635	1	1.03571	0.269637
1117	1116	CS_F	2022-02-17	636	0.5	1.03571	0.288593
1118	1117	CS_F	2022-02-17	637	1	1.42857	0.322968
1119	1118	CS_F	2022-02-17	638	1	1.35714	0.317956
1120	1119	CS_F	2022-02-17	639	0.5	1.25	0.343592
1121	1120	CS_F	2022-02-17	640	1	1.21429	0.259003
1122	1121	CS_F	2022-02-17	641	1	1.28571	0.340623
1123	1122	CS_F	2022-02-17	642	0	0.928571	0.240857
1124	1123	CS_F	2022-02-17	643	0.5	0.785714	0.18798
1125	1124	CS_F	2022-02-17	644	1	1.60714	0.34249
1126	1125	CS_F	2022-02-17	645	0	1.10714	0.475148
1127	1126	CS_F	2022-02-17	646	1	2.17857	0.778436
1128	1127	CS_F	2022-02-17	647	0	1.21429	0.40289
1129	1128	CS_F	2022-02-17	648	1	1.60714	0.446442
1130	1129	CS_F	2022-02-17	649	1	1.42857	0.515445
1131	1130	CS_F	2022-02-17	650	1	2.32143	0.738319
1132	1131	CS_F	2022-02-17	651	1	1.39286	0.268935
1133	1132	CS_F	2022-02-17	652	1	1.35714	0.273205
1134	1133	CS_F	2022-02-17	653	1	1	0.281718
1135	1134	CS_F	2022-02-17	654	1	1.10714	0.248484
1136	1135	CS_F	2022-02-17	655	1	1.46429	0.339164
1137	1136	CS_F	2022-02-17	656	1	2.28571	1.03236
1138	1137	CS_F	2022-02-17	657	1	2.39286	0.856564
1139	1138	CS_F	2022-02-17	658	1	1.32143	0.295708
1140	1139	CS_F	2022-02-17	659	1	1.5	0.390021
1141	1140	CS_F	2022-02-17	660	1	1.32143	0.333546
1142	1141	CS_F	2022-02-17	661	1	1.92857	0.430112
1143	1142	CS_F	2022-02-17	662	1	1.46429	0.274499
1144	1143	CS_F	2022-02-17	663	1	1.5	0.343111
1145	1144	CS_F	2022-02-17	664	1	1.89286	0.545155
1146	1145	CS_F	2022-02-17	665	1	1.78571	0.488917
1147	1146	CS_F	2022-02-17	666	1	1.46429	0.269637
1148	1147	CS_F	2022-02-17	667	1	1.14286	0.311653
1149	1148	CS_F	2022-02-17	668	1.5	1.92857	0.420785
1150	1149	CS_F	2022-02-17	669	1	1.35714	0.330201
1151	1150	CS_F	2022-02-17	670	1	1.5	0.221228
1152	1151	CS_F	2022-02-17	671	1	1.57143	0.274241
1153	1152	CS_F	2022-02-17	672	1	1.46429	0.365446
1154	1153	CS_F	2022-02-17	673	0.5	0.857143	0.203893
1155	1154	CS_F	2022-02-17	674	2	1.96429	0.288593
1156	1155	CS_F	2022-02-17	675	0.5	1.14286	0.26082
1157	1156	CS_F	2022-02-17	676	1.5	2.78571	0.754803
1158	1157	CS_F	2022-02-17	677	0.5	0.785714	0.18798
1159	1158	CS_F	2022-02-17	678	1	0.928571	0.19873
1160	1159	CS_F	2022-02-17	679	1	1.17857	0.206082
1161	1160	CS_F	2022-02-17	680	1	2.60714	1.76259
1162	1161	CS_F	2022-02-17	681	1	1.75	0.400479
1163	1162	CS_F	2022-02-17	682	1	0.857143	0.16031
1164	1163	CS_F	2022-02-17	683	1	1.32143	0.236003
1165	1164	CS_F	2022-02-17	684	1	1.32143	0.241543
1166	1165	CS_F	2022-02-17	685	1	1.25	0.189855
1167	1166	CS_F	2022-02-17	686	1	1.10714	0.248484
1168	1167	CS_F	2022-02-17	687	1	1.10714	0.231965
1169	1168	CS_F	2022-02-17	688	1	1.03571	0.202381
1170	1169	CS_F	2022-02-17	689	1	2	0.482498
1171	1170	CS_F	2022-02-17	690	1	1.46429	0.449815
1172	1171	CS_F	2022-02-17	691	1	1.46429	0.396686
1173	1172	CS_F	2022-02-17	692	0	0.892857	0.248484
1174	1173	CS_F	2022-02-17	693	0	1.17857	0.568237
1175	1174	CS_F	2022-02-17	694	1	1.71429	0.363177
1176	1175	CS_F	2022-02-17	695	0	1.03571	0.393338
1177	1176	CS_F	2022-02-17	696	0	0.607143	0.157185
1178	1177	CS_F	2022-02-17	697	1	1.39286	0.507456
1179	1178	CS_F	2022-02-17	698	1	1.14286	0.294187
1180	1179	CS_F	2022-02-17	699	0	1.14286	0.30738
1181	1180	CS_F	2022-02-17	700	0	1.96429	0.755022
1182	1181	CS_F	2022-02-17	701	0	1.53571	0.555116
1183	1182	CS_F	2022-02-17	702	0	1.75	0.98886
1184	1183	CS_F	2022-02-17	703	0.5	1.60714	0.527897
1185	1184	CS_F	2022-02-17	704	0	1.64286	0.598088
1186	1185	CS_F	2022-02-17	705	0	0.678571	0.212404
1187	1186	CS_F	2022-02-17	706	0	0.75	0.358661
1188	1187	CS_F	2022-02-17	707	0	0.607143	0.1732
1189	1188	CS_F	2022-02-17	708	0	0.892857	0.278599
1190	1189	CS_F	2022-02-17	709	0	0.678571	0.218542
1191	1190	CS_F	2022-02-17	710	0	0.357143	0.13815
1192	1191	CS_F	2022-02-17	711	0	0.678571	0.218542
1193	1192	CS_F	2022-02-17	712	0	1	0.524531
1194	1193	CS_F	2022-02-17	713	0	1.67857	0.524666
1195	1194	CS_F	2022-02-17	714	0	1.07143	0.644325
1196	1195	CS_F	2022-02-17	715	0	0.642857	0.200623
1197	1196	CS_F	2022-02-17	716	0	1.5	0.702415
1198	1197	CS_F	2022-02-17	717	0	0.75	0.233588
1199	1198	CS_F	2022-02-17	718	0	1.07143	0.436219
1200	1199	CS_F	2022-02-17	719	0	0.678571	0.236003
1201	1200	CS_F	2022-02-17	720	0	1.78571	0.820306
1202	1201	CS_F	2022-02-17	721	0	1.07143	0.367058
1203	1202	CS_F	2022-02-17	722	0	0.714286	0.256436
1204	1203	CS_F	2022-02-17	723	0	1.17857	0.632149
1205	1204	CS_F	2022-02-17	724	0	0.928571	0.295148
1206	1205	CS_F	2022-02-17	725	0	0.821429	0.277239
1207	1206	CS_F	2022-02-17	726	0	0.785714	0.26406
1208	1207	CS_F	2022-02-17	727	0	0.714286	0.245904
1209	1208	CS_F	2022-02-17	728	0	1.25	0.538529
1210	1209	CS_F	2022-02-17	729	0	0.464286	0.25964
1211	1210	CS_F	2022-02-17	730	0	0.392857	0.148531
1212	1211	CS_F	2022-02-17	731	0	0.214286	0.107363
1213	1212	CS_F	2022-02-17	732	0	0.821429	0.381634
1214	1213	CS_F	2022-02-17	733	0	0.571429	0.297381
1215	1214	CS_F	2022-02-17	734	0	0.428571	0.202031
1216	1215	CS_F	2022-02-17	735	0	0.5	0.269725
1217	1216	CS_F	2022-02-17	736	0	1.03571	0.416213
1218	1217	CS_F	2022-02-17	737	0	1.64286	1.28711
1219	1218	CS_F	2022-02-17	738	0	0.714286	0.312259
1220	1219	CS_F	2022-02-17	739	0	0.857143	0.750157
1221	1220	CS_F	2022-02-17	740	0	0.714286	0.479355
1222	1221	CS_F	2022-02-17	741	0	0.857143	0.390747
1223	1222	CS_F	2022-02-17	742	0	0.357143	0.13815
1224	1223	CS_F	2022-02-17	743	0	0.178571	0.103555
1225	1224	CS_F	2022-02-17	744	0	0.464286	0.232778
1226	1225	CS_F	2022-02-17	745	0	0.857143	0.328192
1227	1226	CS_F	2022-02-17	746	0	0.571429	0.33503
1228	1227	CS_F	2022-02-17	747	0	0.285714	0.134687
1229	1228	CS_F	2022-02-17	748	0	0.357143	0.156129
1230	1229	CS_F	2022-02-17	749	0	0.464286	0.297619
1231	1230	CS_F	2022-02-17	750	0	0.464286	0.181718
1232	1231	CS_F	2022-02-17	751	0	1.07143	0.451126
1233	1232	CS_F	2022-02-17	752	0	0.607143	0.253751
1234	1233	CS_F	2022-02-17	753	0	0.25	0.182755
1235	1234	CS_F	2022-02-17	754	0	0.785714	0.428351
1236	1235	CS_F	2022-02-17	755	0	0.928571	0.519281
1237	1236	CS_F	2022-02-17	756	0	0.821429	0.345238
1238	1237	CS_F	2022-02-17	757	0	0.392857	0.157185
1239	1238	CS_F	2022-02-17	758	0	0.678571	0.360238
1240	1239	CS_F	2022-02-17	759	0	0.785714	0.357672
1241	1240	CS_F	2022-02-17	760	0	0.357143	0.186972
1242	1241	CS_F	2022-02-17	761	0	0.214286	0.0942408
1243	1242	CS_F	2022-02-17	762	0	0.785714	0.431428
1244	1243	CS_F	2022-02-17	763	0	0.321429	0.163085
1245	1244	CS_F	2022-02-17	764	0	0.321429	0.171004
1246	1245	CS_F	2022-02-17	765	0	0.535714	0.306379
1247	1246	CS_F	2022-02-17	766	0	0.714286	0.52417
1248	1247	CS_F	2022-02-17	767	0	0.821429	0.363891
1249	1248	CS_F	2022-02-17	768	0	0.321429	0.218542
1250	1249	CS_F	2022-02-17	769	0	0.464286	0.238393
1251	1250	CS_F	2022-02-17	770	0	0.428571	0.243587
1252	1251	CS_F	2022-02-17	771	0	0.357143	0.322089
1253	1252	CS_F	2022-02-17	772	0	0.571429	0.264418
1254	1253	CS_F	2022-02-17	773	0	1.53571	0.618246
1255	1254	CS_F	2022-02-17	774	0	1.07143	0.633977
1256	1255	CS_F	2022-02-17	775	0	1.25	0.769156
1257	1256	CS_F	2022-02-17	776	0	1.10714	0.483427
1258	1257	CS_F	2022-02-17	777	0	0.678571	0.60652
1259	1258	CS_F	2022-02-17	778	0	0.357143	0.253099
1260	1259	CS_F	2022-02-17	779	0	0.464286	0.208815
1261	1260	CS_F	2022-02-17	780	0	1.03571	0.507828
1262	1261	CS_F	2022-02-17	781	0	0.5	0.249338
1263	1262	CS_F	2022-02-17	782	0	0.535714	0.350669
1264	1263	CS_F	2022-02-17	783	0	0.0357143	0.0357143
1265	1264	CS_F	2022-02-17	784	0	0.5	0.350736
1266	1265	CS_F	2022-02-17	785	0	1.21429	1.00047
1267	1266	CS_F	2022-02-17	786	0	0.678571	0.504093
1268	1267	CS_F	2022-02-17	787	0	0.464286	0.269637
1269	1268	CS_F	2022-02-17	788	0	0.178571	0.126549
1270	1269	CS_F	2022-02-17	789	0	0.0714286	0.0714286
1271	1270	CS_F	2022-02-17	790	0	0.107143	0.107143
1272	1271	CS_F	2022-02-17	791	0	0.178571	0.126549
1273	1272	CS_F	2022-02-17	792	0	0.785714	0.389536
1274	1273	CS_F	2022-02-17	793	0	1	0.460044
1275	1274	CS_F	2022-02-17	794	0	0.214286	0.0942408
1276	1275	CS_F	2022-02-17	795	0	0.178571	0.115625
1277	1276	CS_F	2022-02-17	796	0	0.464286	0.243878
1278	1277	CS_F	2022-02-17	797	0	0.357143	0.200623
1279	1278	CS_F	2022-02-17	798	0	0.321429	0.145965
1280	1279	CS_F	2022-02-17	799	0	0.142857	0.111677
1281	1280	CS_F	2022-02-17	800	0	0.392857	0.214175
1282	1281	CS_F	2022-02-17	801	0	0.892857	0.449395
1283	1282	CS_F	2022-02-17	802	0	0.821429	0.688249
1284	1283	CS_F	2022-02-17	803	0	0.928571	0.718111
1285	1284	CS_F	2022-02-17	804	0	0.785714	0.412622
1286	1285	CS_F	2022-02-17	805	0	0.428571	0.322968
1287	1286	CS_F	2022-02-17	806	0	0.5	0.259731
1288	1287	CS_F	2022-02-17	807	0	0.714286	0.352081
1289	1288	CS_F	2022-02-17	808	0	0.821429	0.457314
1290	1289	CS_F	2022-02-17	809	0	0.178571	0.115625
1291	1290	CS_F	2022-02-17	810	0	0.75	0.475942
1292	1291	CS_F	2022-02-17	811	0	0.571429	0.33503
1293	1292	CS_F	2022-02-17	812	0	0.571429	0.288348
1294	1293	CS_F	2022-02-17	813	0	0.678571	0.374638
1295	1294	CS_F	2022-02-17	814	0	0.964286	0.600886
1296	1295	CS_F	2022-02-17	815	0	0.535714	0.331272
1297	1296	CS_F	2022-02-17	816	0	0.392857	0.187854
1298	1297	CS_F	2022-02-17	817	0	0.714286	0.471003
1299	1298	CS_F	2022-02-17	818	0	0.357143	0.287363
1300	1299	CS_F	2022-02-17	819	0	0.285714	0.17711
1301	1300	CS_F	2022-02-17	820	0	0.357143	0.225458
1302	1301	CS_F	2022-02-17	821	0	0.25	0.175368
1303	1302	CS_F	2022-02-17	822	0	0.321429	0.163085
1304	1303	CS_F	2022-02-17	823	0	0.285714	0.161484
1305	1304	CS_F	2022-02-17	824	0	0.428571	0.232473
1306	1305	CS_F	2022-02-17	825	0	0.571429	0.365252
1307	1306	CS_F	2022-02-17	826	0	0.25	0.151054
1308	1307	CS_F	2022-02-17	827	0	0.5	0.249338
1309	1308	CS_F	2022-02-17	828	0	0	0
1310	1309	CS_F	2022-02-17	829	0	0.214286	0.129684
1311	1310	CS_F	2022-02-17	830	0	0.464286	0.361808
1312	1311	CS_F	2022-02-17	831	0	0.321429	0.19956
1313	1312	CS_F	2022-02-17	832	0	0.464286	0.327255
1314	1313	CS_F	2022-02-17	833	0	0.392857	0.268935
1315	1314	CS_F	2022-02-17	834	0	0.285714	0.204817
1316	1315	CS_F	2022-02-17	835	0	0.107143	0.107143
1317	1316	CS_F	2022-02-17	836	0	0.892857	0.399534
1318	1317	CS_F	2022-02-17	837	0	0.321429	0.224513
1319	1318	CS_F	2022-02-17	838	0	0.714286	0.490268
1320	1319	CS_F	2022-02-17	839	0	0.607143	0.283307
1321	1320	CS_F	2022-02-17	840	0	0.321429	0.171004
1322	1321	CS_F	2022-02-17	841	0	0.571429	0.274241
1323	1322	CS_F	2022-02-17	842	0	0.0357143	0.0357143
1324	1323	CS_F	2022-02-17	843	0	0.285714	0.144174
1325	1324	CS_F	2022-02-17	844	0	0.714286	0.340623
1326	1325	CS_F	2022-02-17	845	0	0.785714	0.472406
1327	1326	CS_F	2022-02-17	846	0	0.607143	0.278599
1328	1327	CS_F	2022-02-17	847	0	0.678571	0.291201
1329	1328	CS_F	2022-02-17	848	0	0.75	0.284638
1330	1329	CS_F	2022-02-17	849	0	1.10714	0.628552
1331	1330	CS_F	2022-02-17	850	0	0.678571	0.28197
1332	1331	CS_F	2022-02-17	851	0	1.21429	0.545198
1333	1332	CS_F	2022-02-17	852	0	0.5	0.208928
1334	1333	CS_F	2022-02-17	853	0	0.75	0.347421
1335	1334	CS_F	2022-02-17	854	0	1	0.381448
1336	1335	CS_F	2022-02-17	855	0	0.642857	0.349657
1337	1336	CS_F	2022-02-17	856	0	0.928571	0.404762
1338	1337	CS_F	2022-02-17	857	0	0.214286	0.0942408
1339	1338	CS_F	2022-02-17	858	0	1.25	0.693173
1340	1339	CS_F	2022-02-17	859	0	0.571429	0.322968
1341	1340	CS_F	2022-02-17	860	0	0.678571	0.378152
1342	1341	CS_F	2022-02-17	861	0	1.07143	0.348574
1343	1342	CS_F	2022-02-17	862	0	0.392857	0.165386
1344	1343	CS_F	2022-02-17	863	0	0.535714	0.232778
1345	1344	CS_F	2022-02-17	864	0	0.285714	0.153074
1346	1345	CS_F	2022-02-17	865	0	0.607143	0.237599
1347	1346	CS_F	2022-02-17	866	0	0.285714	0.191466
1348	1347	CS_F	2022-02-17	867	0	0.357143	0.207111
1349	1348	CS_F	2022-02-17	868	0	0.75	0.31966
1350	1349	CS_F	2022-02-17	869	0	1.25	0.661938
1351	1350	CS_F	2022-02-17	870	0	0.892857	0.587208
1352	1351	CS_F	2022-02-17	871	0	0.178571	0.089879
1353	1352	CS_F	2022-02-17	872	0	0.821429	0.678571
1354	1353	CS_F	2022-02-17	873	0	0.214286	0.129684
1355	1354	CS_F	2022-02-17	874	0	0.5	0.288675
1356	1355	CS_F	2022-02-17	875	0	0.678571	0.341385
1357	1356	CS_F	2022-02-17	876	0	1.67857	1.13977
1358	1357	CS_F	2022-02-17	877	0	1.5	1.00725
1359	1358	CS_F	2022-02-17	878	0	1.78571	1.10477
1360	1359	CS_F	2022-02-17	879	0	0.535714	0.361808
1361	1360	CS_F	2022-02-17	880	0	0.607143	0.372107
1362	1361	CS_F	2022-02-17	881	0	0.892857	0.443469
1363	1362	CS_F	2022-02-17	882	0	0.5	0.323261
1364	1363	CS_F	2022-02-17	883	0	0.392857	0.268935
1365	1364	CS_F	2022-02-17	884	0	0.428571	0.269374
1366	1365	CS_F	2022-02-17	885	0	0.321429	0.236003
1367	1366	CS_F	2022-02-17	886	0	0.142857	0.142857
1368	1367	CS_F	2022-02-17	887	0	0.142857	0.111677
1369	1368	CS_F	2022-02-17	888	0	0.5	0.335312
1370	1369	CS_F	2022-02-17	889	0	0.821429	0.584304
1371	1370	CS_F	2022-02-17	890	0	0.607143	0.278599
1372	1371	CS_F	2022-02-17	891	0	0.142857	0.111677
1373	1372	CS_F	2022-02-17	892	0	0.964286	0.486544
1374	1373	CS_F	2022-02-17	893	0	1.46429	0.859867
1375	1374	CS_F	2022-02-17	894	0	0.642857	0.263344
1376	1375	CS_F	2022-02-17	895	0	0.964286	0.346876
1377	1376	CS_F	2022-02-17	896	0	0.607143	0.237599
1378	1377	CS_F	2022-02-17	897	0	0.678571	0.427412
1379	1378	CS_F	2022-02-17	898	0	0.392857	0.207908
1380	1379	CS_F	2022-02-17	899	0	0.714286	0.256436
1381	1380	CS_F	2022-02-17	900	0	0.285714	0.124479
1382	1381	CS_F	2022-02-17	901	0	0.285714	0.21735
1383	1382	CS_F	2022-02-17	902	0	0.25	0.121988
1384	1383	CS_F	2022-02-17	903	0	0.642857	0.263344
1385	1384	CS_F	2022-02-17	904	0	0.785714	0.412622
1386	1385	CS_F	2022-02-17	905	0	0.142857	0.0847387
1387	1386	CS_F	2022-02-17	906	0	0.0714286	0.0495635
1388	1387	CS_F	2022-02-17	907	0	0.107143	0.0786676
1389	1388	CS_F	2022-02-17	908	0	0.714286	0.384409
1390	1389	CS_F	2022-02-17	909	0	0.714286	0.380952
1391	1390	CS_F	2022-02-17	910	0	0.357143	0.200623
1392	1391	CS_F	2022-02-17	911	0	0.571429	0.264418
1393	1392	CS_F	2022-02-17	912	0	0.785714	0.386126
1394	1393	CS_F	2022-02-17	913	0	0.428571	0.181328
1395	1394	CS_F	2022-02-17	914	0	0.178571	0.073707
1396	1395	CS_F	2022-02-17	915	0	0.285714	0.153074
1397	1396	CS_F	2022-02-17	916	0	1.32143	0.902749
1398	1397	CS_F	2022-02-17	917	0	0.25	0.142028
1399	1398	CS_F	2022-02-17	918	0	0.464286	0.238393
1400	1399	CS_F	2022-02-17	919	0	0.0714286	0.0495635
1401	1400	CS_F	2022-02-17	920	0	0.5	0.208928
1402	1401	CS_F	2022-02-17	921	0	0.107143	0.0786676
1403	1402	CS_F	2022-02-17	922	0	0.0357143	0.0357143
1404	1403	CS_F	2022-02-17	923	0	0.75	0.461837
1405	1404	CS_F	2022-02-17	924	0	0.25	0.189855
1406	1405	CS_F	2022-02-17	925	0	0.107143	0.107143
1407	1406	CS_F	2022-02-17	926	0	0.107143	0.0595238
1408	1407	CS_F	2022-02-17	927	0	0.607143	0.361285
1409	1408	CS_F	2022-02-17	928	0	0.178571	0.178571
1410	1409	CS_F	2022-02-17	929	0	0.25	0.132388
1411	1410	CS_F	2022-02-17	930	0	0.428571	0.274241
1412	1411	CS_F	2022-02-17	931	0	0.642857	0.357143
1413	1412	CS_F	2022-02-17	932	0	0.107143	0.0595238
1414	1413	CS_F	2022-02-17	933	0	0.214286	0.214286
1415	1414	CS_F	2022-02-17	934	0	0.428571	0.283723
1416	1415	CS_F	2022-02-17	935	0	0.285714	0.124479
1417	1416	CS_F	2022-02-17	936	0	0.821429	0.549299
1418	1417	CS_F	2022-02-17	937	0	0.464286	0.327255
1419	1418	CS_F	2022-02-17	938	0	0.0714286	0.0714286
1420	1419	CS_F	2022-02-17	939	0	0.571429	0.310438
1421	1420	CS_F	2022-02-17	940	0	0.428571	0.283723
1422	1421	CS_F	2022-02-17	941	0	0	0
1423	1422	CS_F	2022-02-17	942	0	0.428571	0.188482
1424	1423	CS_F	2022-02-17	943	0	0.535714	0.274499
1425	1424	CS_F	2022-02-17	944	0	1.46429	0.82533
1426	1425	CS_F	2022-02-17	945	0	0.714286	0.370389
1427	1426	CS_F	2022-02-17	946	0	0.25	0.151054
1428	1427	CS_F	2022-02-17	947	0	0.321429	0.257448
1429	1428	CS_F	2022-02-17	948	0	0.25	0.182755
1430	1429	CS_F	2022-02-17	949	0	0.357143	0.193917
1431	1430	CS_F	2022-02-17	950	0	0.678571	0.360238
1432	1431	CS_F	2022-02-17	951	0	0.285714	0.204817
1433	1432	CS_F	2022-02-17	952	0	0.25	0.189855
1434	1433	CS_F	2022-02-17	953	0	0.785714	0.443522
1435	1434	CS_F	2022-02-17	954	0	0.464286	0.393338
1436	1435	CS_F	2022-02-17	955	0	0.321429	0.185831
1437	1436	CS_F	2022-02-17	956	0	0.178571	0.115625
1438	1437	CS_F	2022-02-17	957	0	0.214286	0.180806
1439	1438	CS_F	2022-02-17	958	0	0.285714	0.223353
1440	1439	CS_F	2022-02-17	959	0	0.357143	0.200623
1441	0	CS_F	2022-02-18	960	0	0.928571	0.536815
1442	1	CS_F	2022-02-18	961	0	0.464286	0.243878
1443	2	CS_F	2022-02-18	962	0	0.107143	0.0595238
1444	3	CS_F	2022-02-18	963	0	0.142857	0.0847387
1445	4	CS_F	2022-02-18	964	0	0.357143	0.207111
1446	5	CS_F	2022-02-18	965	0	0.178571	0.115625
1447	6	CS_F	2022-02-18	966	0	0.535714	0.302031
1448	7	CS_F	2022-02-18	967	0	0.5	0.369112
1449	8	CS_F	2022-02-18	968	0	0.535714	0.215056
1450	9	CS_F	2022-02-18	969	0	0.964286	0.440905
1451	10	CS_F	2022-02-18	970	0	0.0357143	0.0357143
1452	11	CS_F	2022-02-18	971	0	0.214286	0.180806
1453	12	CS_F	2022-02-18	972	0	0.75	0.647798
1454	13	CS_F	2022-02-18	973	0	0.392857	0.22619
1455	14	CS_F	2022-02-18	974	0	0.642857	0.35342
1456	15	CS_F	2022-02-18	975	0	0.75	0.331842
1457	16	CS_F	2022-02-18	976	0	0.392857	0.165386
1458	17	CS_F	2022-02-18	977	0	1.10714	0.515216
1459	18	CS_F	2022-02-18	978	0	0.892857	0.382623
1460	19	CS_F	2022-02-18	979	0	0.25	0.110614
1461	20	CS_F	2022-02-18	980	0	0.857143	0.390747
1462	21	CS_F	2022-02-18	981	0	1.21429	0.446495
1463	22	CS_F	2022-02-18	982	0	0.428571	0.232473
1464	23	CS_F	2022-02-18	983	0	0.25	0.132388
1465	24	CS_F	2022-02-18	984	0	0.607143	0.287938
1466	25	CS_F	2022-02-18	985	0	0.321429	0.236003
1467	26	CS_F	2022-02-18	986	0	0.428571	0.232473
1468	27	CS_F	2022-02-18	987	0	0.571429	0.365252
1469	28	CS_F	2022-02-18	988	0	0.142857	0.0847387
1470	29	CS_F	2022-02-18	989	0	0.285714	0.153074
1471	30	CS_F	2022-02-18	990	0	0.285714	0.21735
1472	31	CS_F	2022-02-18	991	0	0.535714	0.396686
1473	32	CS_F	2022-02-18	992	0	0.142857	0.0847387
1474	33	CS_F	2022-02-18	993	0	0.285714	0.113356
1475	34	CS_F	2022-02-18	994	0	0.321429	0.178571
1476	35	CS_F	2022-02-18	995	0	1	0.590937
1477	36	CS_F	2022-02-18	996	0	1.85714	0.812785
1478	37	CS_F	2022-02-18	997	0	0.642857	0.378714
1479	38	CS_F	2022-02-18	998	0	0.321429	0.163085
1480	39	CS_F	2022-02-18	999	0	0.0714286	0.0714286
1481	40	CS_F	2022-02-18	1000	0	0.214286	0.107363
1482	41	CS_F	2022-02-18	1001	0	0.392857	0.214175
1483	42	CS_F	2022-02-18	1002	0	0.321429	0.154762
1484	43	CS_F	2022-02-18	1003	0	0.178571	0.103555
1485	44	CS_F	2022-02-18	1004	0	0.821429	0.454413
1486	45	CS_F	2022-02-18	1005	0	0	0
1487	46	CS_F	2022-02-18	1006	0	0.214286	0.107363
1488	47	CS_F	2022-02-18	1007	0	0.107143	0.107143
1489	48	CS_F	2022-02-18	1008	0	0.392857	0.22619
1490	49	CS_F	2022-02-18	1009	0	0.214286	0.180806
1491	50	CS_F	2022-02-18	1010	0	0.25	0.142028
1492	51	CS_F	2022-02-18	1011	0	0.142857	0.111677
1493	52	CS_F	2022-02-18	1012	0	0.464286	0.288593
1494	53	CS_F	2022-02-18	1013	0	0	0
1495	54	CS_F	2022-02-18	1014	0	0.107143	0.0786676
1496	55	CS_F	2022-02-18	1015	0	0.285714	0.21735
1497	56	CS_F	2022-02-18	1016	0	0.285714	0.21735
1498	57	CS_F	2022-02-18	1017	0	0.25	0.142028
1499	58	CS_F	2022-02-18	1018	0	0.285714	0.161484
1500	59	CS_F	2022-02-18	1019	0	0.678571	0.317287
1501	60	CS_F	2022-02-18	1020	0	0.714286	0.439026
1502	61	CS_F	2022-02-18	1021	0	0.464286	0.195736
1503	62	CS_F	2022-02-18	1022	0	0.357143	0.186972
1504	63	CS_F	2022-02-18	1023	0	0.678571	0.360238
1505	64	CS_F	2022-02-18	1024	0	0.571429	0.318846
1506	65	CS_F	2022-02-18	1025	0	0.714286	0.312259
1507	66	CS_F	2022-02-18	1026	0	0.642857	0.300855
1508	67	CS_F	2022-02-18	1027	0	0.571429	0.259367
1509	68	CS_F	2022-02-18	1028	0	0.178571	0.115625
1510	69	CS_F	2022-02-18	1029	0	0.642857	0.412164
1511	70	CS_F	2022-02-18	1030	0	0.964286	0.822118
1512	71	CS_F	2022-02-18	1031	0	0.285714	0.161484
1513	72	CS_F	2022-02-18	1032	0	0.25	0.159571
1514	73	CS_F	2022-02-18	1033	0	0.321429	0.163085
1515	74	CS_F	2022-02-18	1034	0	1.60714	0.789044
1516	75	CS_F	2022-02-18	1035	0	0.821429	0.551701
1517	76	CS_F	2022-02-18	1036	0	0.607143	0.268935
1518	77	CS_F	2022-02-18	1037	0	0.285714	0.113356
1519	78	CS_F	2022-02-18	1038	0	0.357143	0.253099
1520	79	CS_F	2022-02-18	1039	0	0.428571	0.188482
1521	80	CS_F	2022-02-18	1040	0	0.785714	0.604999
1522	81	CS_F	2022-02-18	1041	0	0.964286	0.578454
1523	82	CS_F	2022-02-18	1042	0	0.714286	0.423694
1524	83	CS_F	2022-02-18	1043	0	0.214286	0.119048
1525	84	CS_F	2022-02-18	1044	0	0.285714	0.191466
1526	85	CS_F	2022-02-18	1045	0	0.357143	0.193917
1527	86	CS_F	2022-02-18	1046	0	0.285714	0.144174
1528	87	CS_F	2022-02-18	1047	0	0.607143	0.318476
1529	88	CS_F	2022-02-18	1048	0	0.392857	0.165386
1530	89	CS_F	2022-02-18	1049	0	0.5	0.221228
1531	90	CS_F	2022-02-18	1050	0	0.357143	0.231251
1532	91	CS_F	2022-02-18	1051	0	0.928571	0.678328
1533	92	CS_F	2022-02-18	1052	0	0.178571	0.126549
1534	93	CS_F	2022-02-18	1053	0	0.607143	0.35013
1535	94	CS_F	2022-02-18	1054	0	0.214286	0.119048
1536	95	CS_F	2022-02-18	1055	0	0.285714	0.144174
1537	96	CS_F	2022-02-18	1056	0	0.285714	0.144174
1538	97	CS_F	2022-02-18	1057	0	0.107143	0.107143
1539	98	CS_F	2022-02-18	1058	0	0.214286	0.119048
1540	99	CS_F	2022-02-18	1059	0	0.321429	0.19956
1541	100	CS_F	2022-02-18	1060	0	0.357143	0.213402
1542	101	CS_F	2022-02-18	1061	0	0.571429	0.342835
1543	102	CS_F	2022-02-18	1062	0	0.392857	0.263971
1544	103	CS_F	2022-02-18	1063	0	0.5	0.259731
1545	104	CS_F	2022-02-18	1064	0	0.785714	0.512689
1546	105	CS_F	2022-02-18	1065	0	0.178571	0.089879
1547	106	CS_F	2022-02-18	1066	0	0.678571	0.60652
1548	107	CS_F	2022-02-18	1067	0	0.142857	0.111677
1549	108	CS_F	2022-02-18	1068	0	0.0714286	0.0495635
1550	109	CS_F	2022-02-18	1069	0	0.25	0.159571
1551	110	CS_F	2022-02-18	1070	0	0.428571	0.283723
1552	111	CS_F	2022-02-18	1071	0	0.25	0.121988
1553	112	CS_F	2022-02-18	1072	0	0.428571	0.292899
1554	113	CS_F	2022-02-18	1073	0	0.428571	0.202031
1555	114	CS_F	2022-02-18	1074	0	0	0
1556	115	CS_F	2022-02-18	1075	0	0.392857	0.231965
1557	116	CS_F	2022-02-18	1076	0	0.142857	0.0847387
1558	117	CS_F	2022-02-18	1077	0	0.357143	0.200623
1559	118	CS_F	2022-02-18	1078	0	0.0357143	0.0357143
1560	119	CS_F	2022-02-18	1079	0	0.428571	0.33503
1561	120	CS_F	2022-02-18	1080	0	0.25	0.182755
1562	121	CS_F	2022-02-18	1081	0	0.571429	0.288348
1563	122	CS_F	2022-02-18	1082	0	0.25	0.132388
1564	123	CS_F	2022-02-18	1083	0	0.464286	0.25964
1565	124	CS_F	2022-02-18	1084	0	0.107143	0.0595238
1566	125	CS_F	2022-02-18	1085	0	0.5	0.227128
1567	126	CS_F	2022-02-18	1086	0	0.5	0.350736
1568	127	CS_F	2022-02-18	1087	0	0.392857	0.201445
1569	128	CS_F	2022-02-18	1088	0	0.0357143	0.0357143
1570	129	CS_F	2022-02-18	1089	0	0.285714	0.153074
1571	130	CS_F	2022-02-18	1090	0	0.25	0.215933
1572	131	CS_F	2022-02-18	1091	0	0.142857	0.0847387
1573	132	CS_F	2022-02-18	1092	0	0.107143	0.0786676
1574	133	CS_F	2022-02-18	1093	0	0.607143	0.35013
1575	134	CS_F	2022-02-18	1094	0	0.464286	0.227024
1576	135	CS_F	2022-02-18	1095	0	0.428571	0.232473
1577	136	CS_F	2022-02-18	1096	0	0.607143	0.372107
1578	137	CS_F	2022-02-18	1097	0	0.107143	0.0786676
1579	138	CS_F	2022-02-18	1098	0	0.428571	0.327038
1580	139	CS_F	2022-02-18	1099	0	0.571429	0.464133
1581	140	CS_F	2022-02-18	1100	0	0.0357143	0.0357143
1582	141	CS_F	2022-02-18	1101	0	1.35714	0.604687
1583	142	CS_F	2022-02-18	1102	0	0.5	0.279361
1584	143	CS_F	2022-02-18	1103	0	0.535714	0.339164
1585	144	CS_F	2022-02-18	1104	0	0.678571	0.291201
1586	145	CS_F	2022-02-18	1105	0	1.53571	1.04081
1587	146	CS_F	2022-02-18	1106	0	0.857143	0.569773
1588	147	CS_F	2022-02-18	1107	0	0.428571	0.254216
1589	148	CS_F	2022-02-18	1108	0	0.857143	0.618742
1590	149	CS_F	2022-02-18	1109	0	0.357143	0.236902
1591	150	CS_F	2022-02-18	1110	0	0.142857	0.0847387
1592	151	CS_F	2022-02-18	1111	0	1.85714	1.56661
1593	152	CS_F	2022-02-18	1112	0	0.464286	0.232778
1594	153	CS_F	2022-02-18	1113	0	0.142857	0.0673435
1595	154	CS_F	2022-02-18	1114	0	0.142857	0.0673435
1596	155	CS_F	2022-02-18	1115	0	0.0714286	0.0495635
1597	156	CS_F	2022-02-18	1116	0	0.107143	0.0786676
1598	157	CS_F	2022-02-18	1117	0	0.785714	0.350197
1599	158	CS_F	2022-02-18	1118	0	0.5	0.284056
1600	159	CS_F	2022-02-18	1119	0	0.142857	0.0847387
1601	160	CS_F	2022-02-18	1120	0	0.25	0.175368
1602	161	CS_F	2022-02-18	1121	0	0.321429	0.178571
1603	162	CS_F	2022-02-18	1122	0	0.285714	0.144174
1604	163	CS_F	2022-02-18	1123	0	0.25	0.159571
1605	164	CS_F	2022-02-18	1124	0	0.571429	0.331058
1606	165	CS_F	2022-02-18	1125	0	0.321429	0.224513
1607	166	CS_F	2022-02-18	1126	0	0.178571	0.145965
1608	167	CS_F	2022-02-18	1127	0	0.5	0.259731
1609	168	CS_F	2022-02-18	1128	0	0.678571	0.321429
1610	169	CS_F	2022-02-18	1129	0	0.678571	0.388504
1611	170	CS_F	2022-02-18	1130	0	0.25	0.151054
1612	171	CS_F	2022-02-18	1131	0	0.392857	0.243102
1613	172	CS_F	2022-02-18	1132	0	0.0357143	0.0357143
1614	173	CS_F	2022-02-18	1133	0	0.785714	0.463929
1615	174	CS_F	2022-02-18	1134	0	0.321429	0.178571
1616	175	CS_F	2022-02-18	1135	0	0.178571	0.103555
1617	176	CS_F	2022-02-18	1136	0	0.285714	0.204817
1618	177	CS_F	2022-02-18	1137	0	1.21429	1.14129
1619	178	CS_F	2022-02-18	1138	0	0.428571	0.232473
1620	179	CS_F	2022-02-18	1139	0	1.39286	1.02655
1621	180	CS_F	2022-02-18	1140	0	0.571429	0.350467
1622	181	CS_F	2022-02-18	1141	0	0.214286	0.129684
1623	182	CS_F	2022-02-18	1142	0	0.571429	0.368856
1624	183	CS_F	2022-02-18	1143	0	0.178571	0.126549
1625	184	CS_F	2022-02-18	1144	0	0.678571	0.356547
1626	185	CS_F	2022-02-18	1145	0	0.142857	0.111677
1627	186	CS_F	2022-02-18	1146	0	0.464286	0.238393
1628	187	CS_F	2022-02-18	1147	0	0.107143	0.0786676
1629	188	CS_F	2022-02-18	1148	0	0.25	0.175368
1630	189	CS_F	2022-02-18	1149	0	0.392857	0.231965
1631	190	CS_F	2022-02-18	1150	0	0.0357143	0.0357143
1632	191	CS_F	2022-02-18	1151	0	0	0
1633	192	CS_F	2022-02-18	1152	0	0.607143	0.535361
1634	193	CS_F	2022-02-18	1153	0	0.0714286	0.0714286
1635	194	CS_F	2022-02-18	1154	0	0.428571	0.357936
1636	195	CS_F	2022-02-18	1155	0	1.25	0.723061
1637	196	CS_F	2022-02-18	1156	0	0.5	0.361873
1638	197	CS_F	2022-02-18	1157	0	0.285714	0.191466
1639	198	CS_F	2022-02-18	1158	0	0.678571	0.471555
1640	199	CS_F	2022-02-18	1159	0	1.14286	0.825702
1641	200	CS_F	2022-02-18	1160	0	0.678571	0.60652
1642	201	CS_F	2022-02-18	1161	0	1	0.527046
1643	202	CS_F	2022-02-18	1162	0	0.178571	0.126549
1644	203	CS_F	2022-02-18	1163	0	0.178571	0.115625
1645	204	CS_F	2022-02-18	1164	0	0.75	0.343592
1646	205	CS_F	2022-02-18	1165	0	0.464286	0.221121
1647	206	CS_F	2022-02-18	1166	0	0.321429	0.136602
1648	207	CS_F	2022-02-18	1167	0	0.821429	0.490798
1649	208	CS_F	2022-02-18	1168	0	0.428571	0.166099
1650	209	CS_F	2022-02-18	1169	0	0.0714286	0.0714286
1651	210	CS_F	2022-02-18	1170	0	0.25	0.121988
1652	211	CS_F	2022-02-18	1171	0	0.321429	0.171004
1653	212	CS_F	2022-02-18	1172	0	0.25	0.159571
1654	213	CS_F	2022-02-18	1173	0	0.0714286	0.0495635
1655	214	CS_F	2022-02-18	1174	0	0.857143	0.717717
1656	215	CS_F	2022-02-18	1175	0	1.75	1.01265
1657	216	CS_F	2022-02-18	1176	0	0.321429	0.145965
1658	217	CS_F	2022-02-18	1177	0	0.107143	0.0786676
1659	218	CS_F	2022-02-18	1178	0	0.214286	0.107363
1660	219	CS_F	2022-02-18	1179	0	0.25	0.132388
1661	220	CS_F	2022-02-18	1180	0	0.464286	0.302031
1662	221	CS_F	2022-02-18	1181	0	0.285714	0.144174
1663	222	CS_F	2022-02-18	1182	0	0.0714286	0.0714286
1664	223	CS_F	2022-02-18	1183	0	0.107143	0.107143
1665	224	CS_F	2022-02-18	1184	0	0.321429	0.192818
1666	225	CS_F	2022-02-18	1185	0	0.0357143	0.0357143
1667	226	CS_F	2022-02-18	1186	0	0.285714	0.153074
1668	227	CS_F	2022-02-18	1187	0	0.392857	0.220265
1669	228	CS_F	2022-02-18	1188	0	0.392857	0.22619
1670	229	CS_F	2022-02-18	1189	0	0.607143	0.368535
1671	230	CS_F	2022-02-18	1190	0	0.928571	0.678328
1672	231	CS_F	2022-02-18	1191	0	0.392857	0.243102
1673	232	CS_F	2022-02-18	1192	0	0.142857	0.142857
1674	233	CS_F	2022-02-18	1193	0	0.607143	0.353887
1675	234	CS_F	2022-02-18	1194	0	0.821429	0.471555
1676	235	CS_F	2022-02-18	1195	0	0.392857	0.139342
1677	236	CS_F	2022-02-18	1196	0	0.107143	0.0595238
1678	237	CS_F	2022-02-18	1197	0	0.821429	0.333546
1679	238	CS_F	2022-02-18	1198	0	0.964286	0.440905
1680	239	CS_F	2022-02-18	1199	0	0.321429	0.206082
1681	240	CS_F	2022-02-18	1200	0	0.214286	0.14869
1682	241	CS_F	2022-02-18	1201	0	0.75	0.279952
1683	242	CS_F	2022-02-18	1202	0	0.821429	0.367508
1684	243	CS_F	2022-02-18	1203	0	0.571429	0.243587
1685	244	CS_F	2022-02-18	1204	0	0.142857	0.0847387
1686	245	CS_F	2022-02-18	1205	0	0.464286	0.264686
1687	246	CS_F	2022-02-18	1206	0	0.214286	0.0942408
1688	247	CS_F	2022-02-18	1207	0	0.5	0.238492
1689	248	CS_F	2022-02-18	1208	0	0.214286	0.129684
1690	249	CS_F	2022-02-18	1209	0	0.285714	0.124479
1691	250	CS_F	2022-02-18	1210	0	0.714286	0.373943
1692	251	CS_F	2022-02-18	1211	0	0.0357143	0.0357143
1693	252	CS_F	2022-02-18	1212	0	0.142857	0.111677
1694	253	CS_F	2022-02-18	1213	0	0.285714	0.144174
1695	254	CS_F	2022-02-18	1214	0	0.285714	0.113356
1696	255	CS_F	2022-02-18	1215	0	1.67857	0.762989
1697	256	CS_F	2022-02-18	1216	0	1.67857	0.818202
1698	257	CS_F	2022-02-18	1217	0	0.678571	0.504093
1699	258	CS_F	2022-02-18	1218	0	1.25	0.653896
1700	259	CS_F	2022-02-18	1219	0	0.678571	0.427412
1701	260	CS_F	2022-02-18	1220	0	0.25	0.159571
1702	261	CS_F	2022-02-18	1221	0	0.464286	0.215056
1703	262	CS_F	2022-02-18	1222	0	0.607143	0.446442
1704	263	CS_F	2022-02-18	1223	0	0.464286	0.269637
1705	264	CS_F	2022-02-18	1224	0	0.607143	0.301404
1706	265	CS_F	2022-02-18	1225	0	0.214286	0.14869
1707	266	CS_F	2022-02-18	1226	0	0.678571	0.445594
1708	267	CS_F	2022-02-18	1227	0	0.428571	0.232473
1709	268	CS_F	2022-02-18	1228	0	0.357143	0.213402
1710	269	CS_F	2022-02-18	1229	0	0.25	0.159571
1711	270	CS_F	2022-02-18	1230	0	0.464286	0.202381
1712	271	CS_F	2022-02-18	1231	0	0.428571	0.202031
1713	272	CS_F	2022-02-18	1232	0	0.25	0.159571
1714	273	CS_F	2022-02-18	1233	0	0.785714	0.28802
1715	274	CS_F	2022-02-18	1234	0	0.5	0.232879
1716	275	CS_F	2022-02-18	1235	0	0.428571	0.322968
1717	276	CS_F	2022-02-18	1236	0	0.392857	0.187854
1718	277	CS_F	2022-02-18	1237	0	1	0.527046
1719	278	CS_F	2022-02-18	1238	0	1.53571	1.0046
1720	279	CS_F	2022-02-18	1239	0	1.5	0.600925
1721	280	CS_F	2022-02-18	1240	0	0.892857	0.326677
1722	281	CS_F	2022-02-18	1241	0	0.285714	0.124479
1723	282	CS_F	2022-02-18	1242	0	0.75	0.284638
1724	283	CS_F	2022-02-18	1243	0	0.857143	0.447551
1725	284	CS_F	2022-02-18	1244	0	0.714286	0.307994
1726	285	CS_F	2022-02-18	1245	0	0.464286	0.25964
1727	286	CS_F	2022-02-18	1246	0	0.928571	0.344759
1728	287	CS_F	2022-02-18	1247	0	1	0.615067
1729	288	CS_F	2022-02-18	1248	0	0.214286	0.107363
1730	289	CS_F	2022-02-18	1249	0	0.321429	0.136602
1731	290	CS_F	2022-02-18	1250	0	0.607143	0.278599
1732	291	CS_F	2022-02-18	1251	0	0.392857	0.237599
1733	292	CS_F	2022-02-18	1252	0	0.25	0.121988
1734	293	CS_F	2022-02-18	1253	0	0.0714286	0.0495635
1735	294	CS_F	2022-02-18	1254	0	0.642857	0.29193
1736	295	CS_F	2022-02-18	1255	0	0.321429	0.126549
1737	296	CS_F	2022-02-18	1256	0	0.928571	0.286045
1738	297	CS_F	2022-02-18	1257	0	1.10714	0.475148
1739	298	CS_F	2022-02-18	1258	0	0.714286	0.290307
1740	299	CS_F	2022-02-18	1259	0	0.25	0.159571
1741	300	CS_F	2022-02-18	1260	0	0.714286	0.281047
1742	301	CS_F	2022-02-18	1261	0	1.92857	0.925718
1743	302	CS_F	2022-02-18	1262	0	1.07143	0.586282
1744	303	CS_F	2022-02-18	1263	0	0.607143	0.220265
1745	304	CS_F	2022-02-18	1264	0	0.5	0.284056
1746	305	CS_F	2022-02-18	1265	0	0.535714	0.208815
1747	306	CS_F	2022-02-18	1266	0	0.214286	0.119048
1748	307	CS_F	2022-02-18	1267	0	0.607143	0.361285
1749	308	CS_F	2022-02-18	1268	0	1.03571	0.641349
1750	309	CS_F	2022-02-18	1269	0	0.642857	0.258272
1751	310	CS_F	2022-02-18	1270	0	0.5	0.297698
1752	311	CS_F	2022-02-18	1271	0	0.5	0.254588
1753	312	CS_F	2022-02-18	1272	0	0.25	0.0979283
1754	313	CS_F	2022-02-18	1273	0	0.892857	0.353887
1755	314	CS_F	2022-02-18	1274	0	0.357143	0.13815
1756	315	CS_F	2022-02-18	1275	0	0.571429	0.166099
1757	316	CS_F	2022-02-18	1276	0	0.321429	0.136602
1758	317	CS_F	2022-02-18	1277	0	0.714286	0.445011
1759	318	CS_F	2022-02-18	1278	0	0.928571	0.316765
1760	319	CS_F	2022-02-18	1279	0	0.321429	0.163085
1761	320	CS_F	2022-02-18	1280	0	0.571429	0.331058
1762	321	CS_F	2022-02-18	1281	0	0.178571	0.089879
1763	322	CS_F	2022-02-18	1282	0	0.464286	0.293141
1764	323	CS_F	2022-02-18	1283	0	0.392857	0.231965
1765	324	CS_F	2022-02-18	1284	0	0.535714	0.238393
1766	325	CS_F	2022-02-18	1285	0	0.321429	0.19956
1767	326	CS_F	2022-02-18	1286	0	0.607143	0.27381
1768	327	CS_F	2022-02-18	1287	0	0.142857	0.0847387
1769	328	CS_F	2022-02-18	1288	0	0.571429	0.318846
1770	329	CS_F	2022-02-18	1289	0	0.357143	0.225458
1771	330	CS_F	2022-02-18	1290	0	0.571429	0.288348
1772	331	CS_F	2022-02-18	1291	0	0.428571	0.202031
1773	332	CS_F	2022-02-18	1292	0	1.07143	0.593012
1774	333	CS_F	2022-02-18	1293	0	0.285714	0.191466
1775	334	CS_F	2022-02-18	1294	0	1.07143	0.474003
1776	335	CS_F	2022-02-18	1295	0	1.53571	0.62251
1777	336	CS_F	2022-02-18	1296	0	1.07143	0.417629
1778	337	CS_F	2022-02-18	1297	0	0.5	0.208928
1779	338	CS_F	2022-02-18	1298	0	0.928571	0.482302
1780	339	CS_F	2022-02-18	1299	0	0.535714	0.215056
1781	340	CS_F	2022-02-18	1300	0	0.964286	0.409807
1782	341	CS_F	2022-02-18	1301	0	1.39286	0.711469
1783	342	CS_F	2022-02-18	1302	0	0.214286	0.129684
1784	343	CS_F	2022-02-18	1303	0	0.464286	0.283973
1785	344	CS_F	2022-02-18	1304	0	0.964286	0.406567
1786	345	CS_F	2022-02-18	1305	0	0.75	0.447288
1787	346	CS_F	2022-02-18	1306	0	0.964286	0.525745
1788	347	CS_F	2022-02-18	1307	0	0.892857	0.520326
1789	348	CS_F	2022-02-18	1308	0	0.464286	0.274499
1790	349	CS_F	2022-02-18	1309	0	0.285714	0.144174
1791	350	CS_F	2022-02-18	1310	0	0.857143	0.404061
1792	351	CS_F	2022-02-18	1311	0	0.357143	0.156129
1793	352	CS_F	2022-02-18	1312	0	0.321429	0.192818
1794	353	CS_F	2022-02-18	1313	0	0.25	0.151054
1795	354	CS_F	2022-02-18	1314	0	0.178571	0.103555
1796	355	CS_F	2022-02-18	1315	0	0.892857	0.653317
1797	356	CS_F	2022-02-18	1316	0	1	0.656671
1798	357	CS_F	2022-02-18	1317	0	0.285714	0.223353
1799	358	CS_F	2022-02-18	1318	0	0.357143	0.322089
1800	359	CS_F	2022-02-18	1319	0	0.357143	0.172242
1801	360	CS_F	2022-02-18	1320	0	0.392857	0.187854
1802	361	CS_F	2022-02-18	1321	0	0.678571	0.329556
1803	362	CS_F	2022-02-18	1322	0	0.678571	0.352818
1804	363	CS_F	2022-02-18	1323	0	1	0.581914
1805	364	CS_F	2022-02-18	1324	0	0.607143	0.22619
1806	365	CS_F	2022-02-18	1325	0	0.571429	0.214726
1807	366	CS_F	2022-02-18	1326	0	0.464286	0.195736
1808	367	CS_F	2022-02-18	1327	0	0.571429	0.259367
1809	368	CS_F	2022-02-18	1328	0	0.321429	0.145965
1810	369	CS_F	2022-02-18	1329	0	0.678571	0.398587
1811	370	CS_F	2022-02-18	1330	0	0.607143	0.466721
1812	371	CS_F	2022-02-18	1331	0	0.714286	0.328767
1813	372	CS_F	2022-02-18	1332	0	0.678571	0.374638
1814	373	CS_F	2022-02-18	1333	0	0.642857	0.242421
1815	374	CS_F	2022-02-18	1334	0	1.17857	0.678571
1816	375	CS_F	2022-02-18	1335	0	0.178571	0.089879
1817	376	CS_F	2022-02-18	1336	0	0.678571	0.241543
1818	377	CS_F	2022-02-18	1337	0	0.75	0.502967
1819	378	CS_F	2022-02-18	1338	0	0.607143	0.207908
1820	379	CS_F	2022-02-18	1339	0	0.678571	0.224513
1821	380	CS_F	2022-02-18	1340	0	1.17857	0.597733
1822	381	CS_F	2022-02-18	1341	0	0.285714	0.113356
1823	382	CS_F	2022-02-18	1342	0	0.535714	0.283973
1824	383	CS_F	2022-02-18	1343	0	0.428571	0.157935
1825	384	CS_F	2022-02-18	1344	0	0.535714	0.269637
1826	385	CS_F	2022-02-18	1345	0	0.678571	0.272426
1827	386	CS_F	2022-02-18	1346	0	0.5	0.174423
1828	387	CS_F	2022-02-18	1347	0	0.321429	0.154762
1829	388	CS_F	2022-02-18	1348	0	0.607143	0.263971
1830	389	CS_F	2022-02-18	1349	0	0.357143	0.13815
1831	390	CS_F	2022-02-18	1350	0	0.821429	0.367508
1832	391	CS_F	2022-02-18	1351	0	0.464286	0.227024
1833	392	CS_F	2022-02-18	1352	0	0.357143	0.225458
1834	393	CS_F	2022-02-18	1353	0	0.714286	0.336718
1835	394	CS_F	2022-02-18	1354	0	0.857143	0.34776
1836	395	CS_F	2022-02-18	1355	0	0.285714	0.134687
1837	396	CS_F	2022-02-18	1356	0	0.357143	0.13815
1838	397	CS_F	2022-02-18	1357	0	0.821429	0.427412
1839	398	CS_F	2022-02-18	1358	0	0.464286	0.238393
1840	399	CS_F	2022-02-18	1359	0	0.464286	0.232778
1841	400	CS_F	2022-02-18	1360	0	0.357143	0.164383
1842	401	CS_F	2022-02-18	1361	0	0.821429	0.457314
1843	402	CS_F	2022-02-18	1362	0	0.285714	0.113356
1844	403	CS_F	2022-02-18	1363	0	0.607143	0.314295
1845	404	CS_F	2022-02-18	1364	0	0.392857	0.201445
1846	405	CS_F	2022-02-18	1365	0	0.964286	0.409807
1847	406	CS_F	2022-02-18	1366	0	0.178571	0.115625
1848	407	CS_F	2022-02-18	1367	0	0.571429	0.279022
1849	408	CS_F	2022-02-18	1368	0	0.642857	0.287363
1850	409	CS_F	2022-02-18	1369	0	0.321429	0.163085
1851	410	CS_F	2022-02-18	1370	0	0.892857	0.49692
1852	411	CS_F	2022-02-18	1371	0	0.892857	0.318476
1853	412	CS_F	2022-02-18	1372	0	0.714286	0.299281
1854	413	CS_F	2022-02-18	1373	0	0.5	0.221228
1855	414	CS_F	2022-02-18	1374	0	0.428571	0.214726
1856	415	CS_F	2022-02-18	1375	0	0.678571	0.391894
1857	416	CS_F	2022-02-18	1376	0	0.428571	0.254216
1858	417	CS_F	2022-02-18	1377	0	0.285714	0.161484
1859	418	CS_F	2022-02-18	1378	0	0.607143	0.243102
1860	419	CS_F	2022-02-18	1379	0	0.5	0.208928
1861	420	CS_F	2022-02-18	1380	0	0.357143	0.253099
1862	421	CS_F	2022-02-18	1381	0	0.607143	0.27381
1863	422	CS_F	2022-02-18	1382	0	0.392857	0.148531
1864	423	CS_F	2022-02-18	1383	0	0.607143	0.268935
1865	424	CS_F	2022-02-18	1384	0	0.321429	0.136602
1866	425	CS_F	2022-02-18	1385	0	0.0714286	0.0495635
1867	426	CS_F	2022-02-18	1386	0	0.25	0.182755
1868	427	CS_F	2022-02-18	1387	0	0.678571	0.352818
1869	428	CS_F	2022-02-18	1388	0	0.214286	0.119048
1870	429	CS_F	2022-02-18	1389	0	0.535714	0.208815
1871	430	CS_F	2022-02-18	1390	0	0.5	0.249338
1872	431	CS_F	2022-02-18	1391	0	0.25	0.110614
1873	432	CS_F	2022-02-18	1392	0	0.464286	0.243878
1874	433	CS_F	2022-02-18	1393	0	0.571429	0.327038
1875	434	CS_F	2022-02-18	1394	0	0.464286	0.158383
1876	435	CS_F	2022-02-18	1395	0	0.571429	0.269374
1877	436	CS_F	2022-02-18	1396	0	1.39286	0.535361
1878	437	CS_F	2022-02-18	1397	0	1.14286	0.518734
1879	438	CS_F	2022-02-18	1398	0	0.928571	0.49315
1880	439	CS_F	2022-02-18	1399	0	1.75	1.31296
1881	440	CS_F	2022-02-18	1400	0	1.46429	1.17456
1882	441	CS_F	2022-02-18	1401	0	0.392857	0.157185
1883	442	CS_F	2022-02-18	1402	0	0.75	0.260367
1884	443	CS_F	2022-02-18	1403	1	1.89286	0.463879
1885	444	CS_F	2022-02-18	1404	1	1.53571	0.327255
1886	445	CS_F	2022-02-18	1405	1.5	2.42857	0.661545
1887	446	CS_F	2022-02-18	1406	1	2.07143	0.529372
1888	447	CS_F	2022-02-18	1407	2	2.21429	0.512689
1889	448	CS_F	2022-02-18	1408	1.5	1.71429	0.328767
1890	449	CS_F	2022-02-18	1409	1	1.78571	0.334748
1891	450	CS_F	2022-02-18	1410	2.5	3.14286	0.641828
1892	451	CS_F	2022-02-18	1411	1	1.42857	0.264418
1893	452	CS_F	2022-02-18	1412	1	1.85714	0.410556
1894	453	CS_F	2022-02-18	1413	1.5	1.96429	0.350669
1895	454	CS_F	2022-02-18	1414	0.5	0.857143	0.222505
1896	455	CS_F	2022-02-18	1415	1	1.21429	0.253844
1897	456	CS_F	2022-02-18	1416	1	1.17857	0.192818
1898	457	CS_F	2022-02-18	1417	1	1.71429	0.439026
1899	458	CS_F	2022-02-18	1418	2	2.53571	0.879638
1900	459	CS_F	2022-02-18	1419	1	2.82143	1.08019
1901	460	CS_F	2022-02-18	1420	1	1.92857	0.567946
1902	461	CS_F	2022-02-18	1421	1	0.964286	0.208815
1903	462	CS_F	2022-02-18	1422	1	1.46429	0.310666
1904	463	CS_F	2022-02-18	1423	0.5	0.928571	0.235301
1905	464	CS_F	2022-02-18	1424	1	1.5	0.323261
1906	465	CS_F	2022-02-18	1425	1	1.14286	0.265843
1907	466	CS_F	2022-02-18	1426	1	1.21429	0.248579
1908	467	CS_F	2022-02-18	1427	1.5	2.57143	0.715343
1909	468	CS_F	2022-02-18	1428	1	3.67857	1.57783
1910	469	CS_F	2022-02-18	1429	0.5	1.78571	0.575876
1911	470	CS_F	2022-02-18	1430	1	1.53571	0.331272
1912	471	CS_F	2022-02-18	1431	1	1.03571	0.215056
1913	472	CS_F	2022-02-18	1432	1	0.964286	0.279276
1914	473	CS_F	2022-02-18	1433	1	1.21429	0.232067
1915	474	CS_F	2022-02-18	1434	1	1.57143	0.357936
1916	475	CS_F	2022-02-18	1435	1	1.28571	0.324719
1917	476	CS_F	2022-02-18	1436	1	1.75	0.426084
1918	477	CS_F	2022-02-18	1437	1	2.35714	1.0016
1919	478	CS_F	2022-02-18	1438	1.5	2.21429	0.463929
1920	479	CS_F	2022-02-18	1439	1	1.57143	0.292899
1921	480	CS_F	2022-02-18	0	1	1.32143	0.421177
1922	481	CS_F	2022-02-18	1	1	1.67857	0.522138
1923	482	CS_F	2022-02-18	2	0	1.21429	0.346399
1924	483	CS_F	2022-02-18	3	0.5	1.64286	0.561589
1925	484	CS_F	2022-02-18	4	0	1.5	0.566947
1926	485	CS_F	2022-02-18	5	1	1.21429	0.26406
1927	486	CS_F	2022-02-18	6	0	0.928571	0.271818
1928	487	CS_F	2022-02-18	7	1	1.28571	0.380952
1929	488	CS_F	2022-02-18	8	0	1.5	0.515629
1930	489	CS_F	2022-02-18	9	0	3.39286	2.06017
1931	490	CS_F	2022-02-18	10	1	1.25	0.323772
1932	491	CS_F	2022-02-18	11	0.5	1	0.241249
1933	492	CS_F	2022-02-18	12	1	1.60714	0.440476
1934	493	CS_F	2022-02-18	13	1	2.42857	1.58817
1935	494	CS_F	2022-02-18	14	0	1.28571	0.442029
1936	495	CS_F	2022-02-18	15	1	1.57143	0.354221
1937	496	CS_F	2022-02-18	16	1	1.64286	0.408942
1938	497	CS_F	2022-02-18	17	1	0.964286	0.238393
1939	498	CS_F	2022-02-18	18	1	0.892857	0.201445
1940	499	CS_F	2022-02-18	19	1	1.14286	0.294187
1941	500	CS_F	2022-02-18	20	0	0.642857	0.186972
1942	501	CS_F	2022-02-18	21	0	0.821429	0.236003
1943	502	CS_F	2022-02-18	22	0	1.14286	0.400774
1944	503	CS_F	2022-02-18	23	0	1.07143	0.526867
1945	504	CS_F	2022-02-18	24	0	1.10714	0.54028
1946	505	CS_F	2022-02-18	25	1	1.32143	0.391894
1947	506	CS_F	2022-02-18	26	0.5	1.03571	0.269637
1948	507	CS_F	2022-02-18	27	0	1.07143	0.367058
1949	508	CS_F	2022-02-18	28	1	1.32143	0.37109
1950	509	CS_F	2022-02-18	29	0	0.714286	0.184428
1951	510	CS_F	2022-02-18	30	0	0.607143	0.237599
1952	511	CS_F	2022-02-18	31	0	1.03571	0.283973
1953	512	CS_F	2022-02-18	32	0.5	1.07143	0.356083
1954	513	CS_F	2022-02-18	33	0	1	0.482498
1955	514	CS_F	2022-02-18	34	0	2.21429	1.09152
1956	515	CS_F	2022-02-18	35	0	1	0.262265
1957	516	CS_F	2022-02-18	36	0	0.857143	0.26082
1958	517	CS_F	2022-02-18	37	0.5	1.03571	0.25964
1959	518	CS_F	2022-02-18	38	0	1	0.430331
1960	519	CS_F	2022-02-18	39	0	1.71429	0.837066
1961	520	CS_F	2022-02-18	40	0	2.39286	1.19117
1962	521	CS_F	2022-02-18	41	0	1.32143	0.463063
1963	522	CS_F	2022-02-18	42	1	1.14286	0.303046
1964	523	CS_F	2022-02-18	43	0	1	0.46859
1965	524	CS_F	2022-02-18	44	0	0.714286	0.245904
1966	525	CS_F	2022-02-18	45	0	1.10714	0.412565
1967	526	CS_F	2022-02-18	46	1	2	0.988024
1968	527	CS_F	2022-02-18	47	0	1.17857	0.388504
1969	528	CS_F	2022-02-18	48	0	0.892857	0.278599
1970	529	CS_F	2022-02-18	49	1	2.25	0.657929
1971	530	CS_F	2022-02-18	50	0	1.67857	0.670729
1972	531	CS_F	2022-02-18	51	1	1	0.235702
1973	532	CS_F	2022-02-18	52	1	1.57143	0.535582
1974	533	CS_F	2022-02-18	53	1	1.07143	0.223776
1975	534	CS_F	2022-02-18	54	0	0.5	0.195857
1976	535	CS_F	2022-02-18	55	0	1.35714	0.389051
1977	536	CS_F	2022-02-18	56	0	0.642857	0.213402
1978	537	CS_F	2022-02-18	57	1	1.67857	0.617328
1979	538	CS_F	2022-02-18	58	0	2.25	1.1039
1980	539	CS_F	2022-02-18	59	0	1.25	0.607765
1981	540	CS_F	2022-02-18	60	0	1.60714	0.626444
1982	541	CS_F	2022-02-18	61	0	1.89286	1.10595
1983	542	CS_F	2022-02-18	62	0	0.678571	0.19956
1984	543	CS_F	2022-02-18	63	0	0.928571	0.271818
1985	544	CS_F	2022-02-18	64	0	0.857143	0.222505
1986	545	CS_F	2022-02-18	65	0	0.75	0.227855
1987	546	CS_F	2022-02-18	66	0	0.642857	0.207111
1988	547	CS_F	2022-02-18	67	0.5	1.35714	0.504515
1989	548	CS_F	2022-02-18	68	0	1.25	0.49768
1990	549	CS_F	2022-02-18	69	0.5	1.14286	0.332198
1991	550	CS_F	2022-02-18	70	0	2.32143	0.971898
1992	551	CS_F	2022-02-18	71	0	1.03571	0.434863
1993	552	CS_F	2022-02-18	72	0	0.642857	0.242421
1994	553	CS_F	2022-02-18	73	0	2.75	1.3836
1995	554	CS_F	2022-02-18	74	0	0.714286	0.229199
1996	555	CS_F	2022-02-18	75	1	1.17857	0.349048
1997	556	CS_F	2022-02-18	76	0	1.03571	0.297619
1998	557	CS_F	2022-02-18	77	0	0.857143	0.255698
1999	558	CS_F	2022-02-18	78	1	1.39286	0.382623
[truncated: 101,681 more rows]

## Sheet: 8.Mean_periodograms
	Condition	Period	Mean_Qp.act	SEM_Qp.act	N_of_rhythmic_flies	Mean_Qp.sig	Mean_Qp.act_Qp.sig_ratio	SEM_Qp.act_Qp.sig_ratio
1	CS_F	18	1028.52	11.0156	13	1254.87	0.819622	0.00877828
2	CS_F	18.2	1067.93	13.4952	13	1267.79	0.842352	0.0106446
3	CS_F	18.4	1088.61	12.2785	13	1280.71	0.850003	0.00958727
4	CS_F	18.6	1032.88	22.1885	13	1293.63	0.798438	0.0171521
5	CS_F	18.8	1066.61	14.0055	13	1306.54	0.816367	0.0107195
6	CS_F	19	1042.43	16.7927	13	1319.44	0.790057	0.0127271
7	CS_F	19.2	1089.93	14.8788	13	1332.34	0.818059	0.0111674
8	CS_F	19.4	1106.28	14.1897	13	1345.24	0.822372	0.0105481
9	CS_F	19.6	1126.02	12.9416	13	1358.13	0.829095	0.00952901
10	CS_F	19.8	1133.2	11.504	13	1371.01	0.826541	0.00839085
11	CS_F	20	1170.84	14.018	13	1383.89	0.846046	0.0101294
12	CS_F	20.2	1093.05	14.9777	13	1396.77	0.782557	0.0107231
13	CS_F	20.4	1134.77	14.5351	13	1409.64	0.805003	0.0103111
14	CS_F	20.6	1141.02	12.2926	13	1422.51	0.802115	0.00864148
15	CS_F	20.8	1168.63	12.815	13	1435.38	0.814165	0.00892798
16	CS_F	21	1224.09	12.2443	13	1448.24	0.845225	0.00845461
17	CS_F	21.2	1229.13	9.51049	13	1461.09	0.841236	0.00650916
18	CS_F	21.4	1216.67	10.0852	13	1473.95	0.825451	0.00684228
19	CS_F	21.6	1268.31	16.6122	13	1486.79	0.85305	0.0111732
20	CS_F	21.8	1270.24	15.0398	13	1499.64	0.84703	0.0100289
21	CS_F	22	1183.36	16.2045	13	1512.48	0.782396	0.0107139
22	CS_F	22.2	1212.3	14.8129	13	1525.32	0.794789	0.00971138
23	CS_F	22.4	1235.54	13.847	13	1538.15	0.803264	0.0090024
24	CS_F	22.6	1281.92	15.4604	13	1550.98	0.826522	0.00996816
25	CS_F	22.8	1307.8	12.5011	13	1563.8	0.836297	0.00799406
26	CS_F	23	1383.81	18.7686	13	1576.63	0.877704	0.0119043
27	CS_F	23.2	1471.53	21.017	13	1589.44	0.925813	0.0132229
28	CS_F	23.4	1558.57	24.4053	13	1602.26	0.972734	0.0152318
29	CS_F	23.6	1647.78	35.4809	13	1615.07	1.02025	0.0219687
30	CS_F	23.8	1749.63	52.0624	13	1627.88	1.07479	0.0319818
31	CS_F	24	1804.5	63.154	13	1640.68	1.09985	0.0384925
32	CS_F	24.2	1666.34	46.3731	13	1653.48	1.00778	0.0280457
33	CS_F	24.4	1618.84	40.7733	13	1666.28	0.971531	0.0244697
34	CS_F	24.6	1599.44	37.3789	13	1679.08	0.95257	0.0222616
35	CS_F	24.8	1619.55	36.3594	13	1691.87	0.957258	0.0214907
36	CS_F	25	1575.48	30.1951	13	1704.65	0.924221	0.0177133
37	CS_F	25.2	1571.64	31.7777	13	1717.44	0.915104	0.0185029
38	CS_F	25.4	1571.42	30.1424	13	1730.22	0.90822	0.0174211
39	CS_F	25.6	1567.14	24.2317	13	1743	0.899106	0.0139023
40	CS_F	25.8	1564.15	21.9392	13	1755.78	0.890859	0.0124955
41	CS_F	26	1543.87	17.4292	13	1768.55	0.872959	0.00985507
42	CS_F	26.2	1540.89	20.2007	13	1781.32	0.865027	0.0113403
43	CS_F	26.4	1558.58	22.4627	13	1794.09	0.868731	0.0125204
44	CS_F	26.6	1553.27	20.9601	13	1806.85	0.859659	0.0116003
45	CS_F	26.8	1430.84	20.4047	13	1819.61	0.786343	0.0112138
46	CS_F	27	1458	22.2758	13	1832.37	0.795689	0.0121568
47	CS_F	27.2	1472.92	20.1225	13	1845.12	0.798279	0.0109058
48	CS_F	27.4	1477.56	20.6506	13	1857.88	0.795296	0.0111152
49	CS_F	27.6	1512.36	23.5742	13	1870.63	0.808479	0.0126023
50	CS_F	27.8	1533.07	24.2181	13	1883.37	0.814004	0.0128589
51	CS_F	28	1557.76	21.5056	13	1896.12	0.82155	0.0113419
52	CS_F	28.2	1570.86	24.5388	13	1908.86	0.822929	0.0128552
53	CS_F	28.4	1576.62	20.0283	13	1921.6	0.820471	0.0104227
54	CS_F	28.6	1607.61	24.7278	13	1934.34	0.83109	0.0127836
55	CS_F	28.8	1636.74	21.1501	13	1947.07	0.840616	0.0108625
56	CS_F	29	1665.25	14.4923	13	1959.8	0.849705	0.0073948
57	CS_F	29.2	1689.25	15.422	13	1972.53	0.856389	0.00781836
58	CS_F	29.4	1729.62	19.9591	13	1985.26	0.871232	0.0100537
59	CS_F	29.6	1735.88	19.1205	13	1997.98	0.868819	0.00956989
60	CS_F	29.8	1755.29	13.7916	13	2010.7	0.872971	0.00685911
61	CS_F	30	1754.42	14.0621	13	2023.42	0.867056	0.00694966
62	CLK_TRPA1_F	18	1018.45	15.1573	16	1254.87	0.811602	0.0120788
63	CLK_TRPA1_F	18.2	1014.82	12.5652	16	1267.79	0.800459	0.00991108
64	CLK_TRPA1_F	18.4	1030.63	10.3297	16	1280.71	0.804729	0.00806559
65	CLK_TRPA1_F	18.6	986.33	13.0968	16	1293.63	0.762453	0.0101241
66	CLK_TRPA1_F	18.8	980.886	11.5096	16	1306.54	0.750752	0.00880922
67	CLK_TRPA1_F	19	1017.1	9.7419	16	1319.44	0.770859	0.00738335
68	CLK_TRPA1_F	19.2	1042.51	15.0024	16	1332.34	0.782462	0.0112602
69	CLK_TRPA1_F	19.4	1059.96	12.9161	16	1345.24	0.787934	0.00960135
70	CLK_TRPA1_F	19.6	1092.64	10.8901	16	1358.13	0.804522	0.00801844
71	CLK_TRPA1_F	19.8	1117.29	15.1087	16	1371.01	0.814939	0.0110201
72	CLK_TRPA1_F	20	1142.6	10.658	16	1383.89	0.825641	0.00770143
73	CLK_TRPA1_F	20.2	1068.18	16.6864	16	1396.77	0.764752	0.0119464
74	CLK_TRPA1_F	20.4	1111.02	17.3034	16	1409.64	0.788159	0.012275
75	CLK_TRPA1_F	20.6	1126.76	15.6246	16	1422.51	0.792093	0.0109838
76	CLK_TRPA1_F	20.8	1130.01	11.992	16	1435.38	0.787259	0.00835459
77	CLK_TRPA1_F	21	1152.63	12.4595	16	1448.24	0.795883	0.00860318
78	CLK_TRPA1_F	21.2	1150.83	11.2456	16	1461.09	0.78765	0.00769671
79	CLK_TRPA1_F	21.4	1192.99	22.2341	16	1473.95	0.809387	0.0150847
80	CLK_TRPA1_F	21.6	1221.42	18.4431	16	1486.79	0.821515	0.0124046
81	CLK_TRPA1_F	21.8	1267.23	17.423	16	1499.64	0.845027	0.0116181
82	CLK_TRPA1_F	22	1195.07	21.988	16	1512.48	0.790138	0.0145377
83	CLK_TRPA1_F	22.2	1258.58	22.2758	16	1525.32	0.825129	0.0146041
84	CLK_TRPA1_F	22.4	1280.89	35.3857	16	1538.15	0.832747	0.0230054
85	CLK_TRPA1_F	22.6	1364.97	46.3524	16	1550.98	0.880072	0.0298859
86	CLK_TRPA1_F	22.8	1418.88	64.4888	16	1563.8	0.907325	0.0412384
87	CLK_TRPA1_F	23	1472.62	77.9964	16	1576.63	0.934036	0.0494705
88	CLK_TRPA1_F	23.2	1559.37	87.4762	16	1589.44	0.981082	0.0550357
89	CLK_TRPA1_F	23.4	1610.2	91.3244	16	1602.26	1.00495	0.0569973
90	CLK_TRPA1_F	23.6	1634.21	95.3076	16	1615.07	1.01185	0.0590115
91	CLK_TRPA1_F	23.8	1660.82	88.7722	16	1627.88	1.02024	0.0545325
92	CLK_TRPA1_F	24	1688.57	69.5329	16	1640.68	1.02919	0.0423805
93	CLK_TRPA1_F	24.2	1551.68	50.6609	16	1653.48	0.938433	0.0306389
94	CLK_TRPA1_F	24.4	1561.82	53.8956	16	1666.28	0.937312	0.0323448
95	CLK_TRPA1_F	24.6	1595.34	55.6127	16	1679.08	0.950129	0.033121
96	CLK_TRPA1_F	24.8	1638.18	66.1729	16	1691.87	0.968265	0.0391124
97	CLK_TRPA1_F	25	1667.65	81.0436	16	1704.65	0.978294	0.0475425
98	CLK_TRPA1_F	25.2	1724.87	90.5007	16	1717.44	1.00432	0.0526951
99	CLK_TRPA1_F	25.4	1729.06	99.5689	16	1730.22	0.99933	0.0575469
100	CLK_TRPA1_F	25.6	1760.21	115.31	16	1743	1.00988	0.0661561
101	CLK_TRPA1_F	25.8	1714.02	100.192	16	1755.78	0.976221	0.0570643
102	CLK_TRPA1_F	26	1705.16	94.8626	16	1768.55	0.964157	0.0536387
103	CLK_TRPA1_F	26.2	1678.56	84.4311	16	1781.32	0.942311	0.0473981
104	CLK_TRPA1_F	26.4	1666.02	73.4051	16	1794.09	0.928617	0.040915
105	CLK_TRPA1_F	26.6	1668.98	59.6437	16	1806.85	0.923694	0.0330098
106	CLK_TRPA1_F	26.8	1479.4	44.6634	16	1819.61	0.813033	0.0245456
107	CLK_TRPA1_F	27	1497.81	36.9629	16	1832.37	0.817415	0.0201722
108	CLK_TRPA1_F	27.2	1489.41	32.9363	16	1845.12	0.807213	0.0178504
109	CLK_TRPA1_F	27.4	1470.49	23.0195	16	1857.88	0.791489	0.0123902
110	CLK_TRPA1_F	27.6	1475.71	15.7289	16	1870.63	0.788887	0.00840835
111	CLK_TRPA1_F	27.8	1511.29	22.3344	16	1883.37	0.80244	0.0118587
112	CLK_TRPA1_F	28	1510.8	17.7305	16	1896.12	0.796785	0.00935093
113	CLK_TRPA1_F	28.2	1503.49	16.2029	16	1908.86	0.787638	0.00848824
114	CLK_TRPA1_F	28.4	1537.25	23.8513	16	1921.6	0.799986	0.0124122
115	CLK_TRPA1_F	28.6	1539.47	20.7437	16	1934.34	0.795867	0.0107239
116	CLK_TRPA1_F	28.8	1580.77	18.0967	16	1947.07	0.811873	0.00929432
117	CLK_TRPA1_F	29	1618.51	20.1891	16	1959.8	0.825852	0.0103016
118	CLK_TRPA1_F	29.2	1630.5	21.2784	16	1972.53	0.826604	0.0107874
119	CLK_TRPA1_F	29.4	1666.83	22.1312	16	1985.26	0.839603	0.0111478
120	CLK_TRPA1_F	29.6	1695.62	20.4363	16	1997.98	0.848664	0.0102285
121	CLK_TRPA1_F	29.8	1681.62	16.8515	16	2010.7	0.836332	0.00838088
122	CLK_TRPA1_F	30	1740.66	18.2298	16	2023.42	0.860253	0.00900939
123	CS_M	18	1053.68	19.902	19	1254.87	0.839674	0.0158598
124	CS_M	18.2	1065.74	14.339	19	1267.79	0.840627	0.0113102
125	CS_M	18.4	1059.59	10.8455	19	1280.71	0.827345	0.0084683
126	CS_M	18.6	989.634	19.3978	19	1293.63	0.765007	0.0149949
127	CS_M	18.8	990.887	18.7821	19	1306.54	0.758407	0.0143755
128	CS_M	19	1026.9	21.0949	19	1319.44	0.778284	0.0159878
129	CS_M	19.2	1066.29	22.9215	19	1332.34	0.800311	0.0172039
130	CS_M	19.4	1079.09	17.992	19	1345.24	0.80216	0.0133746
131	CS_M	19.6	1104.4	15.6858	19	1358.13	0.813177	0.0115496
132	CS_M	19.8	1127.16	13.5561	19	1371.01	0.822137	0.00988762
133	CS_M	20	1142.36	12.6471	19	1383.89	0.825468	0.00913878
134	CS_M	20.2	1054.49	20.3386	19	1396.77	0.754947	0.0145611
135	CS_M	20.4	1084.71	22.4349	19	1409.64	0.769491	0.0159153
136	CS_M	20.6	1131.59	20.4736	19	1422.51	0.795488	0.0143926
137	CS_M	20.8	1142.71	22.6286	19	1435.38	0.796103	0.0157649
138	CS_M	21	1162.87	21.326	19	1448.24	0.802955	0.0147255
139	CS_M	21.2	1202.89	14.53	19	1461.09	0.823281	0.0099446
140	CS_M	21.4	1203.64	13.7875	19	1473.95	0.816611	0.00935416
141	CS_M	21.6	1253.82	18.0477	19	1486.79	0.843304	0.0121387
142	CS_M	21.8	1279.62	15.8844	19	1499.64	0.853288	0.0105921
143	CS_M	22	1156.32	25.9833	19	1512.48	0.764522	0.0171793
144	CS_M	22.2	1182.64	27.6795	19	1525.32	0.775344	0.0181467
145	CS_M	22.4	1229.52	17.6631	19	1538.15	0.79935	0.0114834
146	CS_M	22.6	1248.97	13.9337	19	1550.98	0.805278	0.0089838
147	CS_M	22.8	1318.11	21.8147	19	1563.8	0.842887	0.0139498
148	CS_M	23	1370.64	21.7841	19	1576.63	0.86935	0.0138169
149	CS_M	23.2	1467.11	30.9813	19	1589.44	0.923034	0.0194919
150	CS_M	23.4	1563.32	32.8819	19	1602.26	0.975701	0.0205222
151	CS_M	23.6	1683.99	51.6432	19	1615.07	1.04268	0.0319759
152	CS_M	23.8	1813.48	64.7401	19	1627.88	1.11401	0.0397696
153	CS_M	24	1938.77	61.8782	19	1640.68	1.18169	0.037715
154	CS_M	24.2	1674.7	54.4766	19	1653.48	1.01283	0.0329466
155	CS_M	24.4	1652.17	40.3527	19	1666.28	0.991532	0.0242172
156	CS_M	24.6	1591.46	37.13	19	1679.08	0.947819	0.0221134
157	CS_M	24.8	1566.88	39.7517	19	1691.87	0.926126	0.0234958
158	CS_M	25	1552.05	31.8775	19	1704.65	0.910479	0.0187003
159	CS_M	25.2	1532.95	22.8963	19	1717.44	0.89258	0.0133316
160	CS_M	25.4	1501.02	21.4072	19	1730.22	0.86753	0.0123725
161	CS_M	25.6	1502.41	16.9918	19	1743	0.86197	0.00974862
162	CS_M	25.8	1522.78	18.0675	19	1755.78	0.867296	0.0102903
163	CS_M	26	1486.89	15.1935	19	1768.55	0.840742	0.00859091
164	CS_M	26.2	1497.88	17.5523	19	1781.32	0.840884	0.00985357
165	CS_M	26.4	1519.73	17.3861	19	1794.09	0.84708	0.00969081
166	CS_M	26.6	1509.92	13.0519	19	1806.85	0.835667	0.00722355
167	CS_M	26.8	1377.22	23.1294	19	1819.61	0.756874	0.0127112
168	CS_M	27	1409.19	28.5483	19	1832.37	0.769054	0.01558
169	CS_M	27.2	1411.93	29.3526	19	1845.12	0.765223	0.0159082
170	CS_M	27.4	1438.04	27.8362	19	1857.88	0.774024	0.0149828
171	CS_M	27.6	1464.19	22.6785	19	1870.63	0.782725	0.0121235
172	CS_M	27.8	1452.74	29.4269	19	1883.37	0.771351	0.0156245
173	CS_M	28	1473.9	28.2783	19	1896.12	0.777325	0.0149138
174	CS_M	28.2	1505.76	23.6503	19	1908.86	0.788828	0.0123897
175	CS_M	28.4	1554.18	27.2271	19	1921.6	0.808794	0.014169
176	CS_M	28.6	1566.22	25.5677	19	1934.34	0.809694	0.0132178
177	CS_M	28.8	1584.45	24.3159	19	1947.07	0.81376	0.0124884
178	CS_M	29	1624.98	19.9876	19	1959.8	0.829155	0.0101988
179	CS_M	29.2	1633.67	16.6341	19	1972.53	0.82821	0.00843286
180	CS_M	29.4	1676.39	26.0182	19	1985.26	0.844418	0.0131057
181	CS_M	29.6	1699.15	13.6946	19	1997.98	0.850434	0.00685421
182	CS_M	29.8	1750.68	18.1681	19	2010.7	0.870679	0.0090357
183	CS_M	30	1800.08	17.1895	19	2023.42	0.88962	0.00849525
184	CLK_TRPA1_M	18	964.733	13.5418	21	1254.87	0.768791	0.0107914
185	CLK_TRPA1_M	18.2	984.129	18.3803	21	1267.79	0.776253	0.0144979
186	CLK_TRPA1_M	18.4	1000.99	14.9873	21	1280.71	0.78159	0.0117023
187	CLK_TRPA1_M	18.6	964.085	16.1765	21	1293.63	0.745257	0.0125048
188	CLK_TRPA1_M	18.8	1005.37	16.5218	21	1306.54	0.769489	0.0126455
189	CLK_TRPA1_M	19	1003.9	13.9894	21	1319.44	0.760852	0.0106025
190	CLK_TRPA1_M	19.2	1032.22	13.1159	21	1332.34	0.774745	0.00984425
191	CLK_TRPA1_M	19.4	1040.25	16.8384	21	1345.24	0.773283	0.0125171
192	CLK_TRPA1_M	19.6	1070.51	9.97018	21	1358.13	0.788227	0.00734112
193	CLK_TRPA1_M	19.8	1098.07	15.9662	21	1371.01	0.800922	0.0116456
194	CLK_TRPA1_M	20	1107.93	15.8897	21	1383.89	0.800591	0.0114819
195	CLK_TRPA1_M	20.2	1069	14.6438	21	1396.77	0.765337	0.010484
196	CLK_TRPA1_M	20.4	1084.81	18.975	21	1409.64	0.769562	0.0134608
197	CLK_TRPA1_M	20.6	1111.71	15.7738	21	1422.51	0.781514	0.0110887
198	CLK_TRPA1_M	20.8	1146.15	21.8763	21	1435.38	0.798502	0.0152408
199	CLK_TRPA1_M	21	1167.92	14.0437	21	1448.24	0.806443	0.00969706
200	CLK_TRPA1_M	21.2	1214.02	20.2884	21	1461.09	0.8309	0.0138858
201	CLK_TRPA1_M	21.4	1281.9	28.0911	21	1473.95	0.869704	0.0190584
202	CLK_TRPA1_M	21.6	1372.24	28.4292	21	1486.79	0.922955	0.0191211
203	CLK_TRPA1_M	21.8	1463.51	44.5128	21	1499.64	0.97591	0.0296823
204	CLK_TRPA1_M	22	1523.25	69.718	21	1512.48	1.00712	0.0460952
205	CLK_TRPA1_M	22.2	1692	86.9161	21	1525.32	1.10928	0.0569824
206	CLK_TRPA1_M	22.4	1862.21	96.5487	21	1538.15	1.21068	0.0627694
207	CLK_TRPA1_M	22.6	1993.4	110.112	21	1550.98	1.28526	0.0709953
208	CLK_TRPA1_M	22.8	2060.8	115.293	21	1563.8	1.31781	0.0737262
209	CLK_TRPA1_M	23	2074.52	110.015	21	1576.63	1.3158	0.0697789
210	CLK_TRPA1_M	23.2	2012.48	106.628	21	1589.44	1.26615	0.0670848
211	CLK_TRPA1_M	23.4	1848.95	89.1779	21	1602.26	1.15397	0.0556576
212	CLK_TRPA1_M	23.6	1727.06	69.0978	21	1615.07	1.06934	0.0427832
213	CLK_TRPA1_M	23.8	1647.98	48.0505	21	1627.88	1.01235	0.0295173
214	CLK_TRPA1_M	24	1568.22	40.5037	21	1640.68	0.955835	0.0246871
215	CLK_TRPA1_M	24.2	1426.53	30.3584	21	1653.48	0.862743	0.0183603
216	CLK_TRPA1_M	24.4	1399.96	24.3883	21	1666.28	0.84017	0.0146364
217	CLK_TRPA1_M	24.6	1379.91	21.8064	21	1679.08	0.821827	0.0129871
218	CLK_TRPA1_M	24.8	1375.01	22.0265	21	1691.87	0.812719	0.0130191
219	CLK_TRPA1_M	25	1349.2	16.3419	21	1704.65	0.791479	0.00958665
220	CLK_TRPA1_M	25.2	1370.63	19.765	21	1717.44	0.798065	0.0115084
221	CLK_TRPA1_M	25.4	1379.2	15.7763	21	1730.22	0.797126	0.0091181
222	CLK_TRPA1_M	25.6	1391.85	15.306	21	1743	0.798537	0.0087814
223	CLK_TRPA1_M	25.8	1435.01	15.7379	21	1755.78	0.817306	0.00896352
224	CLK_TRPA1_M	26	1441.65	20.8696	21	1768.55	0.81516	0.0118004
225	CLK_TRPA1_M	26.2	1440.05	18.3123	21	1781.32	0.808419	0.0102802
226	CLK_TRPA1_M	26.4	1476.48	18.0005	21	1794.09	0.822973	0.0100333
227	CLK_TRPA1_M	26.6	1482.66	17.6196	21	1806.85	0.820577	0.00975155
228	CLK_TRPA1_M	26.8	1370.69	20.3671	21	1819.61	0.753288	0.0111931
229	CLK_TRPA1_M	27	1424.28	20.0052	21	1832.37	0.777291	0.0109177
230	CLK_TRPA1_M	27.2	1411.85	16.1574	21	1845.12	0.765177	0.00875679
231	CLK_TRPA1_M	27.4	1440.88	24.0309	21	1857.88	0.775554	0.0129346
232	CLK_TRPA1_M	27.6	1446.29	16.9829	21	1870.63	0.773157	0.00907873
233	CLK_TRPA1_M	27.8	1492.84	22.0428	21	1883.37	0.792642	0.0117039
234	CLK_TRPA1_M	28	1512.33	16.6203	21	1896.12	0.797594	0.00876543
235	CLK_TRPA1_M	28.2	1528.21	17.5639	21	1908.86	0.800586	0.00920123
236	CLK_TRPA1_M	28.4	1525.51	18.6812	21	1921.6	0.793875	0.00972166
237	CLK_TRPA1_M	28.6	1573.23	17.524	21	1934.34	0.813319	0.00905945
238	CLK_TRPA1_M	28.8	1564.8	17.3781	21	1947.07	0.803669	0.00892527
239	CLK_TRPA1_M	29	1587.51	22.7365	21	1959.8	0.810035	0.0116014
240	CLK_TRPA1_M	29.2	1594.24	19.7386	21	1972.53	0.808221	0.0100067
241	CLK_TRPA1_M	29.4	1621.36	20.9611	21	1985.26	0.816701	0.0105584
242	CLK_TRPA1_M	29.6	1637.26	19.2802	21	1997.98	0.819456	0.00964986
243	CLK_TRPA1_M	29.8	1638.77	18.9386	21	2010.7	0.815023	0.00941887
244	CLK_TRPA1_M	30	1669.99	19.7774	21	2023.42	0.825328	0.00977425
245	Trp_Fru_FLP_M	18	1033.82	16.1035	23	1254.87	0.823849	0.0128328
246	Trp_Fru_FLP_M	18.2	1023.55	16.0266	23	1267.79	0.807349	0.0126413
247	Trp_Fru_FLP_M	18.4	1032.03	14.584	23	1280.71	0.805822	0.0113874
248	Trp_Fru_FLP_M	18.6	974.948	14.4184	23	1293.63	0.753654	0.0111457
249	Trp_Fru_FLP_M	18.8	990.675	11.01	23	1306.54	0.758245	0.00842689
250	Trp_Fru_FLP_M	19	1046.16	16.9502	23	1319.44	0.792884	0.0128465
251	Trp_Fru_FLP_M	19.2	1050.15	14.3489	23	1332.34	0.7882	0.0107697
252	Trp_Fru_FLP_M	19.4	1065.72	18.9876	23	1345.24	0.79222	0.0141147
253	Trp_Fru_FLP_M	19.6	1069.34	15.1886	23	1358.13	0.787367	0.0111835
254	Trp_Fru_FLP_M	19.8	1091.8	14.0032	23	1371.01	0.796348	0.0102138
255	Trp_Fru_FLP_M	20	1100.54	16.9124	23	1383.89	0.79525	0.0122209
256	Trp_Fru_FLP_M	20.2	1069.73	18.1704	23	1396.77	0.765857	0.0130089
257	Trp_Fru_FLP_M	20.4	1106.08	12.6067	23	1409.64	0.784649	0.00894318
258	Trp_Fru_FLP_M	20.6	1124.75	12.7253	23	1422.51	0.790679	0.00894565
259	Trp_Fru_FLP_M	20.8	1124.06	14.4349	23	1435.38	0.783113	0.0100565
260	Trp_Fru_FLP_M	21	1150.7	15.7076	23	1448.24	0.794553	0.010846
261	Trp_Fru_FLP_M	21.2	1166.15	15.4853	23	1461.09	0.798138	0.0105984
262	Trp_Fru_FLP_M	21.4	1199.74	15.2561	23	1473.95	0.813966	0.0103505
263	Trp_Fru_FLP_M	21.6	1218.33	17.9874	23	1486.79	0.819434	0.0120981
264	Trp_Fru_FLP_M	21.8	1238.96	15.4981	23	1499.64	0.826172	0.0103346
265	Trp_Fru_FLP_M	22	1191.59	18.4585	23	1512.48	0.787839	0.0122041
266	Trp_Fru_FLP_M	22.2	1266.94	20.9839	23	1525.32	0.83061	0.0137571
267	Trp_Fru_FLP_M	22.4	1335.77	23.488	23	1538.15	0.868426	0.0152703
268	Trp_Fru_FLP_M	22.6	1394.4	38.3888	23	1550.98	0.899044	0.0247513
269	Trp_Fru_FLP_M	22.8	1478.15	55.4782	23	1563.8	0.94523	0.0354765
270	Trp_Fru_FLP_M	23	1597.72	70.2455	23	1576.63	1.01338	0.0445543
271	Trp_Fru_FLP_M	23.2	1689.31	76.2369	23	1589.44	1.06283	0.0479645
272	Trp_Fru_FLP_M	23.4	1818.04	73.8792	23	1602.26	1.13467	0.0461094
273	Trp_Fru_FLP_M	23.6	1939.35	71.9688	23	1615.07	1.20079	0.0445608
274	Trp_Fru_FLP_M	23.8	2021.05	69.4086	23	1627.88	1.24153	0.0426375
275	Trp_Fru_FLP_M	24	2037.67	81.124	23	1640.68	1.24196	0.0494453
276	Trp_Fru_FLP_M	24.2	1788.65	57.1155	23	1653.48	1.08175	0.0345426
277	Trp_Fru_FLP_M	24.4	1749.05	47.8449	23	1666.28	1.04967	0.0287136
278	Trp_Fru_FLP_M	24.6	1692.16	44.937	23	1679.08	1.00779	0.026763
279	Trp_Fru_FLP_M	24.8	1622.96	34.4173	23	1691.87	0.959273	0.0203428
280	Trp_Fru_FLP_M	25	1594.02	27.9994	23	1704.65	0.9351	0.0164253
281	Trp_Fru_FLP_M	25.2	1560.16	28.2078	23	1717.44	0.908423	0.0164243
282	Trp_Fru_FLP_M	25.4	1535.52	25.783	23	1730.22	0.887469	0.0149016
283	Trp_Fru_FLP_M	25.6	1522.98	25.1742	23	1743	0.873767	0.0144431
284	Trp_Fru_FLP_M	25.8	1519.1	24.3137	23	1755.78	0.865202	0.0138478
285	Trp_Fru_FLP_M	26	1516.34	17.2195	23	1768.55	0.857394	0.00973649
286	Trp_Fru_FLP_M	26.2	1489.44	19.7101	23	1781.32	0.836145	0.0110649
287	Trp_Fru_FLP_M	26.4	1499.04	20.2536	23	1794.09	0.835545	0.0112891
288	Trp_Fru_FLP_M	26.6	1538.84	22.8109	23	1806.85	0.851673	0.0126247
289	Trp_Fru_FLP_M	26.8	1356.51	23.1005	23	1819.61	0.745494	0.0126953
290	Trp_Fru_FLP_M	27	1414.02	19.9166	23	1832.37	0.771689	0.0108693
291	Trp_Fru_FLP_M	27.2	1434.64	17.2759	23	1845.12	0.777531	0.00936299
292	Trp_Fru_FLP_M	27.4	1468.42	22.2899	23	1857.88	0.790377	0.0119975
293	Trp_Fru_FLP_M	27.6	1459.87	22.2762	23	1870.63	0.780417	0.0119084
294	Trp_Fru_FLP_M	27.8	1484.68	18.5342	23	1883.37	0.788309	0.00984093
295	Trp_Fru_FLP_M	28	1492.88	17.2982	23	1896.12	0.787336	0.00912293
296	Trp_Fru_FLP_M	28.2	1532.55	18.756	23	1908.86	0.802861	0.00982577
297	Trp_Fru_FLP_M	28.4	1568.65	18.2834	23	1921.6	0.816327	0.00951468
298	Trp_Fru_FLP_M	28.6	1599.91	17.8918	23	1934.34	0.827112	0.00924956
299	Trp_Fru_FLP_M	28.8	1600.8	18.26	23	1947.07	0.822159	0.0093782
300	Trp_Fru_FLP_M	29	1631.28	20.5546	23	1959.8	0.832368	0.0104881
301	Trp_Fru_FLP_M	29.2	1609.47	19.0655	23	1972.53	0.815941	0.00966549
302	Trp_Fru_FLP_M	29.4	1643.68	17.5322	23	1985.26	0.827942	0.00883118
303	Trp_Fru_FLP_M	29.6	1674.26	16.2704	23	1997.98	0.837975	0.00814343
304	Trp_Fru_FLP_M	29.8	1698.18	15.7915	23	2010.7	0.844569	0.00785372
305	Trp_Fru_FLP_M	30	1713.73	16.5192	23	2023.42	0.846946	0.00816397
306	Trp_Fru_FLP_F	18	1019.93	21.6485	8	1254.87	0.81278	0.0172516
307	Trp_Fru_FLP_F	18.2	1040.06	18.3731	8	1267.79	0.820367	0.0144922
308	Trp_Fru_FLP_F	18.4	1085.85	19.6236	8	1280.71	0.847847	0.0153224
309	Trp_Fru_FLP_F	18.6	998.747	20.0109	8	1293.63	0.772052	0.0154689
310	Trp_Fru_FLP_F	18.8	1026.01	16.6351	8	1306.54	0.785293	0.0127322
311	Trp_Fru_FLP_F	19	1053.23	19.1295	8	1319.44	0.798238	0.0144982
312	Trp_Fru_FLP_F	19.2	1071.56	22.7504	8	1332.34	0.804269	0.0170755
313	Trp_Fru_FLP_F	19.4	1081.92	19.9632	8	1345.24	0.804261	0.0148399
314	Trp_Fru_FLP_F	19.6	1108.81	9.34776	8	1358.13	0.816426	0.00688283
315	Trp_Fru_FLP_F	19.8	1137.04	15.6616	8	1371.01	0.829346	0.0114234
316	Trp_Fru_FLP_F	20	1179.33	24.3341	8	1383.89	0.852179	0.0175838
317	Trp_Fru_FLP_F	20.2	1064.4	17.4317	8	1396.77	0.762042	0.01248
318	Trp_Fru_FLP_F	20.4	1133	14.4959	8	1409.64	0.803747	0.0102834
319	Trp_Fru_FLP_F	20.6	1170.97	31.7004	8	1422.51	0.823168	0.0222848
320	Trp_Fru_FLP_F	20.8	1170.39	13.6211	8	1435.38	0.815387	0.00948958
321	Trp_Fru_FLP_F	21	1172.51	28.5764	8	1448.24	0.809611	0.0197318
322	Trp_Fru_FLP_F	21.2	1235.59	14.2596	8	1461.09	0.845658	0.00975956
323	Trp_Fru_FLP_F	21.4	1243.71	23.4251	8	1473.95	0.843793	0.0158928
324	Trp_Fru_FLP_F	21.6	1211	13.4861	8	1486.79	0.814507	0.00907058
325	Trp_Fru_FLP_F	21.8	1291.46	25.7178	8	1499.64	0.861184	0.0171493
326	Trp_Fru_FLP_F	22	1213.99	29.495	8	1512.48	0.802651	0.0195011
327	Trp_Fru_FLP_F	22.2	1219.87	13.543	8	1525.32	0.79975	0.00887879
328	Trp_Fru_FLP_F	22.4	1241.22	19.0466	8	1538.15	0.80696	0.0123828
329	Trp_Fru_FLP_F	22.6	1351.34	23.1632	8	1550.98	0.871286	0.0149346
330	Trp_Fru_FLP_F	22.8	1369.11	29.1315	8	1563.8	0.875501	0.0186286
331	Trp_Fru_FLP_F	23	1394.66	25.6314	8	1576.63	0.884583	0.0162571
332	Trp_Fru_FLP_F	23.2	1480.79	28.1818	8	1589.44	0.931643	0.0177306
333	Trp_Fru_FLP_F	23.4	1524.36	25.9734	8	1602.26	0.951385	0.0162105
334	Trp_Fru_FLP_F	23.6	1618.39	63.3988	8	1615.07	1.00206	0.0392545
335	Trp_Fru_FLP_F	23.8	1689.76	43.1053	8	1627.88	1.03801	0.0264795
336	Trp_Fru_FLP_F	24	1777.2	44.2086	8	1640.68	1.08321	0.0269453
337	Trp_Fru_FLP_F	24.2	1602.31	63.1893	8	1653.48	0.969049	0.0382159
338	Trp_Fru_FLP_F	24.4	1672.84	53.8242	8	1666.28	1.00394	0.032302
339	Trp_Fru_FLP_F	24.6	1639.58	66.426	8	1679.08	0.976479	0.039561
340	Trp_Fru_FLP_F	24.8	1630.9	41.4716	8	1691.87	0.963964	0.0245123
341	Trp_Fru_FLP_F	25	1581.61	38.0016	8	1704.65	0.92782	0.0222928
342	Trp_Fru_FLP_F	25.2	1588.9	31.5704	8	1717.44	0.925154	0.0183822
343	Trp_Fru_FLP_F	25.4	1565.61	21.9749	8	1730.22	0.90486	0.0127007
344	Trp_Fru_FLP_F	25.6	1542.08	30.2659	8	1743	0.884728	0.0173642
345	Trp_Fru_FLP_F	25.8	1533.88	26.0755	8	1755.78	0.873618	0.0148513
346	Trp_Fru_FLP_F	26	1533.56	19.4012	8	1768.55	0.86713	0.0109701
347	Trp_Fru_FLP_F	26.2	1528.01	20.2936	8	1781.32	0.857796	0.0113925
348	Trp_Fru_FLP_F	26.4	1575.72	18.6692	8	1794.09	0.878287	0.010406
349	Trp_Fru_FLP_F	26.6	1565.29	14.2039	8	1806.85	0.866311	0.00786113
350	Trp_Fru_FLP_F	26.8	1419.06	28.0643	8	1819.61	0.77987	0.0154232
351	Trp_Fru_FLP_F	27	1417.28	17.9305	8	1832.37	0.773467	0.0097854
352	Trp_Fru_FLP_F	27.2	1451.62	19.7209	8	1845.12	0.786731	0.0106881
353	Trp_Fru_FLP_F	27.4	1453.16	19.5809	8	1857.88	0.782163	0.0105394
354	Trp_Fru_FLP_F	27.6	1482.06	27.7088	8	1870.63	0.792279	0.0148126
355	Trp_Fru_FLP_F	27.8	1511.29	21.502	8	1883.37	0.802436	0.0114168
356	Trp_Fru_FLP_F	28	1537.53	30.1483	8	1896.12	0.810882	0.0159
357	Trp_Fru_FLP_F	28.2	1585.48	20.3163	8	1908.86	0.830589	0.0106431
358	Trp_Fru_FLP_F	28.4	1596.08	20.7914	8	1921.6	0.8306	0.0108198
359	Trp_Fru_FLP_F	28.6	1610.85	25.0212	8	1934.34	0.832767	0.0129353
360	Trp_Fru_FLP_F	28.8	1624.13	18.5064	8	1947.07	0.834142	0.00950476
361	Trp_Fru_FLP_F	29	1645.52	21.3613	8	1959.8	0.839634	0.0108997
362	Trp_Fru_FLP_F	29.2	1667.04	20.0014	8	1972.53	0.845125	0.01014
363	Trp_Fru_FLP_F	29.4	1695.34	25.2613	8	1985.26	0.853964	0.0127244
364	Trp_Fru_FLP_F	29.6	1727.55	20.6189	8	1997.98	0.864648	0.0103199
365	Trp_Fru_FLP_F	29.8	1751.34	23.4241	8	2010.7	0.871007	0.0116497
366	Trp_Fru_FLP_F	30	1766.95	16.8462	8	2023.42	0.873248	0.00832558

## Sheet: 9.Period_peaks_and_strength
	Condition	channel	Period	Qp.act	Qp.sig	Act_Sig_ratio	Condition_channel
1	CS_F	clk856DDNCtM001_ch1	18	1068.85	1254.87	0.851765	CS_F_clk856DDNCtM001_ch1
2	CS_F	clk856DDNCtM001_ch1	18.2	994.044	1267.79	0.784074	CS_F_clk856DDNCtM001_ch1
3	CS_F	clk856DDNCtM001_ch1	18.4	1100.05	1280.71	0.858935	CS_F_clk856DDNCtM001_ch1
4	CS_F	clk856DDNCtM001_ch1	18.6	946.686	1293.63	0.731807	CS_F_clk856DDNCtM001_ch1
5	CS_F	clk856DDNCtM001_ch1	18.8	1020.46	1306.54	0.781042	CS_F_clk856DDNCtM001_ch1
6	CS_F	clk856DDNCtM001_ch1	19	1113.76	1319.44	0.844112	CS_F_clk856DDNCtM001_ch1
7	CS_F	clk856DDNCtM001_ch1	19.2	1061.35	1332.34	0.796607	CS_F_clk856DDNCtM001_ch1
8	CS_F	clk856DDNCtM001_ch1	19.4	1064.62	1345.24	0.791401	CS_F_clk856DDNCtM001_ch1
9	CS_F	clk856DDNCtM001_ch1	19.6	1130.14	1358.13	0.832131	CS_F_clk856DDNCtM001_ch1
10	CS_F	clk856DDNCtM001_ch1	19.8	1146.86	1371.01	0.836508	CS_F_clk856DDNCtM001_ch1
11	CS_F	clk856DDNCtM001_ch1	20	1119.38	1383.89	0.808862	CS_F_clk856DDNCtM001_ch1
12	CS_F	clk856DDNCtM001_ch1	20.2	985.939	1396.77	0.70587	CS_F_clk856DDNCtM001_ch1
13	CS_F	clk856DDNCtM001_ch1	20.4	1042.42	1409.64	0.739493	CS_F_clk856DDNCtM001_ch1
14	CS_F	clk856DDNCtM001_ch1	20.6	1131.19	1422.51	0.795207	CS_F_clk856DDNCtM001_ch1
15	CS_F	clk856DDNCtM001_ch1	20.8	1167.23	1435.38	0.813188	CS_F_clk856DDNCtM001_ch1
16	CS_F	clk856DDNCtM001_ch1	21	1225.86	1448.24	0.846447	CS_F_clk856DDNCtM001_ch1
17	CS_F	clk856DDNCtM001_ch1	21.2	1232.69	1461.09	0.843677	CS_F_clk856DDNCtM001_ch1
18	CS_F	clk856DDNCtM001_ch1	21.4	1196.66	1473.95	0.811876	CS_F_clk856DDNCtM001_ch1
19	CS_F	clk856DDNCtM001_ch1	21.6	1324.86	1486.79	0.891083	CS_F_clk856DDNCtM001_ch1
20	CS_F	clk856DDNCtM001_ch1	21.8	1227.3	1499.64	0.818398	CS_F_clk856DDNCtM001_ch1
21	CS_F	clk856DDNCtM001_ch1	22	1111.33	1512.48	0.734775	CS_F_clk856DDNCtM001_ch1
22	CS_F	clk856DDNCtM001_ch1	22.2	1194.26	1525.32	0.78296	CS_F_clk856DDNCtM001_ch1
23	CS_F	clk856DDNCtM001_ch1	22.4	1171.04	1538.15	0.761331	CS_F_clk856DDNCtM001_ch1
24	CS_F	clk856DDNCtM001_ch1	22.6	1212.28	1550.98	0.781621	CS_F_clk856DDNCtM001_ch1
25	CS_F	clk856DDNCtM001_ch1	22.8	1339.77	1563.8	0.856736	CS_F_clk856DDNCtM001_ch1
26	CS_F	clk856DDNCtM001_ch1	23	1349.2	1576.63	0.855755	CS_F_clk856DDNCtM001_ch1
27	CS_F	clk856DDNCtM001_ch1	23.2	1401.76	1589.44	0.881918	CS_F_clk856DDNCtM001_ch1
28	CS_F	clk856DDNCtM001_ch1	23.4	1540.62	1602.26	0.961532	CS_F_clk856DDNCtM001_ch1
29	CS_F	clk856DDNCtM001_ch1	23.6	1567.72	1615.07	0.97068	CS_F_clk856DDNCtM001_ch1
30	CS_F	clk856DDNCtM001_ch1	23.8	1716.47	1627.88	1.05442	CS_F_clk856DDNCtM001_ch1
31	CS_F	clk856DDNCtM001_ch1	24	1687.01	1640.68	1.02824	CS_F_clk856DDNCtM001_ch1
32	CS_F	clk856DDNCtM001_ch1	24.2	1536.52	1653.48	0.929264	CS_F_clk856DDNCtM001_ch1
33	CS_F	clk856DDNCtM001_ch1	24.4	1509.12	1666.28	0.905681	CS_F_clk856DDNCtM001_ch1
34	CS_F	clk856DDNCtM001_ch1	24.6	1546.75	1679.08	0.921192	CS_F_clk856DDNCtM001_ch1
35	CS_F	clk856DDNCtM001_ch1	24.8	1545.74	1691.87	0.913628	CS_F_clk856DDNCtM001_ch1
36	CS_F	clk856DDNCtM001_ch1	25	1499.03	1704.65	0.879377	CS_F_clk856DDNCtM001_ch1
37	CS_F	clk856DDNCtM001_ch1	25.2	1587.14	1717.44	0.924133	CS_F_clk856DDNCtM001_ch1
38	CS_F	clk856DDNCtM001_ch1	25.4	1555.11	1730.22	0.898795	CS_F_clk856DDNCtM001_ch1
39	CS_F	clk856DDNCtM001_ch1	25.6	1478.73	1743	0.848379	CS_F_clk856DDNCtM001_ch1
40	CS_F	clk856DDNCtM001_ch1	25.8	1537.94	1755.78	0.875931	CS_F_clk856DDNCtM001_ch1
41	CS_F	clk856DDNCtM001_ch1	26	1533.19	1768.55	0.866919	CS_F_clk856DDNCtM001_ch1
42	CS_F	clk856DDNCtM001_ch1	26.2	1625.32	1781.32	0.912422	CS_F_clk856DDNCtM001_ch1
43	CS_F	clk856DDNCtM001_ch1	26.4	1538.13	1794.09	0.857335	CS_F_clk856DDNCtM001_ch1
44	CS_F	clk856DDNCtM001_ch1	26.6	1512.78	1806.85	0.837247	CS_F_clk856DDNCtM001_ch1
45	CS_F	clk856DDNCtM001_ch1	26.8	1367.86	1819.61	0.751731	CS_F_clk856DDNCtM001_ch1
46	CS_F	clk856DDNCtM001_ch1	27	1493.85	1832.37	0.815254	CS_F_clk856DDNCtM001_ch1
47	CS_F	clk856DDNCtM001_ch1	27.2	1351.28	1845.12	0.73235	CS_F_clk856DDNCtM001_ch1
48	CS_F	clk856DDNCtM001_ch1	27.4	1413.85	1857.88	0.761004	CS_F_clk856DDNCtM001_ch1
49	CS_F	clk856DDNCtM001_ch1	27.6	1482.26	1870.63	0.792386	CS_F_clk856DDNCtM001_ch1
50	CS_F	clk856DDNCtM001_ch1	27.8	1388.98	1883.37	0.737497	CS_F_clk856DDNCtM001_ch1
51	CS_F	clk856DDNCtM001_ch1	28	1502.09	1896.12	0.792192	CS_F_clk856DDNCtM001_ch1
52	CS_F	clk856DDNCtM001_ch1	28.2	1511.93	1908.86	0.792058	CS_F_clk856DDNCtM001_ch1
53	CS_F	clk856DDNCtM001_ch1	28.4	1506.24	1921.6	0.783845	CS_F_clk856DDNCtM001_ch1
54	CS_F	clk856DDNCtM001_ch1	28.6	1527.88	1934.34	0.789873	CS_F_clk856DDNCtM001_ch1
55	CS_F	clk856DDNCtM001_ch1	28.8	1633.89	1947.07	0.839151	CS_F_clk856DDNCtM001_ch1
56	CS_F	clk856DDNCtM001_ch1	29	1629.86	1959.8	0.831647	CS_F_clk856DDNCtM001_ch1
57	CS_F	clk856DDNCtM001_ch1	29.2	1775.31	1972.53	0.900014	CS_F_clk856DDNCtM001_ch1
58	CS_F	clk856DDNCtM001_ch1	29.4	1836.54	1985.26	0.925089	CS_F_clk856DDNCtM001_ch1
59	CS_F	clk856DDNCtM001_ch1	29.6	1666.06	1997.98	0.83387	CS_F_clk856DDNCtM001_ch1
60	CS_F	clk856DDNCtM001_ch1	29.8	1781.77	2010.7	0.88614	CS_F_clk856DDNCtM001_ch1
61	CS_F	clk856DDNCtM001_ch1	30	1767.68	2023.42	0.873608	CS_F_clk856DDNCtM001_ch1
62	CS_F	clk856DDNCtM001_ch2	18	1074.56	1254.87	0.856315	CS_F_clk856DDNCtM001_ch2
63	CS_F	clk856DDNCtM001_ch2	18.2	1056.05	1267.79	0.832983	CS_F_clk856DDNCtM001_ch2
64	CS_F	clk856DDNCtM001_ch2	18.4	1096.21	1280.71	0.855938	CS_F_clk856DDNCtM001_ch2
65	CS_F	clk856DDNCtM001_ch2	18.6	1036.63	1293.63	0.801339	CS_F_clk856DDNCtM001_ch2
66	CS_F	clk856DDNCtM001_ch2	18.8	1070.44	1306.54	0.819296	CS_F_clk856DDNCtM001_ch2
67	CS_F	clk856DDNCtM001_ch2	19	979.333	1319.44	0.742233	CS_F_clk856DDNCtM001_ch2
68	CS_F	clk856DDNCtM001_ch2	19.2	1110.29	1332.34	0.833334	CS_F_clk856DDNCtM001_ch2
69	CS_F	clk856DDNCtM001_ch2	19.4	999.42	1345.24	0.742932	CS_F_clk856DDNCtM001_ch2
70	CS_F	clk856DDNCtM001_ch2	19.6	1047.26	1358.13	0.771105	CS_F_clk856DDNCtM001_ch2
71	CS_F	clk856DDNCtM001_ch2	19.8	1100.91	1371.01	0.802991	CS_F_clk856DDNCtM001_ch2
72	CS_F	clk856DDNCtM001_ch2	20	1252.23	1383.89	0.904857	CS_F_clk856DDNCtM001_ch2
73	CS_F	clk856DDNCtM001_ch2	20.2	1139.42	1396.77	0.815751	CS_F_clk856DDNCtM001_ch2
74	CS_F	clk856DDNCtM001_ch2	20.4	1139.23	1409.64	0.808168	CS_F_clk856DDNCtM001_ch2
75	CS_F	clk856DDNCtM001_ch2	20.6	1187.43	1422.51	0.834743	CS_F_clk856DDNCtM001_ch2
76	CS_F	clk856DDNCtM001_ch2	20.8	1183.15	1435.38	0.824275	CS_F_clk856DDNCtM001_ch2
77	CS_F	clk856DDNCtM001_ch2	21	1194.56	1448.24	0.824838	CS_F_clk856DDNCtM001_ch2
78	CS_F	clk856DDNCtM001_ch2	21.2	1225.04	1461.09	0.838442	CS_F_clk856DDNCtM001_ch2
79	CS_F	clk856DDNCtM001_ch2	21.4	1180	1473.95	0.800572	CS_F_clk856DDNCtM001_ch2
80	CS_F	clk856DDNCtM001_ch2	21.6	1277.51	1486.79	0.859239	CS_F_clk856DDNCtM001_ch2
81	CS_F	clk856DDNCtM001_ch2	21.8	1190.33	1499.64	0.793742	CS_F_clk856DDNCtM001_ch2
82	CS_F	clk856DDNCtM001_ch2	22	1232.11	1512.48	0.814631	CS_F_clk856DDNCtM001_ch2
83	CS_F	clk856DDNCtM001_ch2	22.2	1227.4	1525.32	0.804687	CS_F_clk856DDNCtM001_ch2
84	CS_F	clk856DDNCtM001_ch2	22.4	1328.8	1538.15	0.863895	CS_F_clk856DDNCtM001_ch2
85	CS_F	clk856DDNCtM001_ch2	22.6	1288.96	1550.98	0.831063	CS_F_clk856DDNCtM001_ch2
86	CS_F	clk856DDNCtM001_ch2	22.8	1297.77	1563.8	0.829882	CS_F_clk856DDNCtM001_ch2
87	CS_F	clk856DDNCtM001_ch2	23	1527.17	1576.63	0.968634	CS_F_clk856DDNCtM001_ch2
88	CS_F	clk856DDNCtM001_ch2	23.2	1515.28	1589.44	0.953339	CS_F_clk856DDNCtM001_ch2
89	CS_F	clk856DDNCtM001_ch2	23.4	1649.59	1602.26	1.02954	CS_F_clk856DDNCtM001_ch2
90	CS_F	clk856DDNCtM001_ch2	23.6	1763.36	1615.07	1.09182	CS_F_clk856DDNCtM001_ch2
91	CS_F	clk856DDNCtM001_ch2	23.8	1896.72	1627.88	1.16515	CS_F_clk856DDNCtM001_ch2
92	CS_F	clk856DDNCtM001_ch2	24	2127.86	1640.68	1.29693	CS_F_clk856DDNCtM001_ch2
93	CS_F	clk856DDNCtM001_ch2	24.2	1907.75	1653.48	1.15378	CS_F_clk856DDNCtM001_ch2
94	CS_F	clk856DDNCtM001_ch2	24.4	1866.32	1666.28	1.12005	CS_F_clk856DDNCtM001_ch2
95	CS_F	clk856DDNCtM001_ch2	24.6	1789.15	1679.08	1.06556	CS_F_clk856DDNCtM001_ch2
96	CS_F	clk856DDNCtM001_ch2	24.8	1885.11	1691.87	1.11422	CS_F_clk856DDNCtM001_ch2
97	CS_F	clk856DDNCtM001_ch2	25	1712.93	1704.65	1.00486	CS_F_clk856DDNCtM001_ch2
98	CS_F	clk856DDNCtM001_ch2	25.2	1732.21	1717.44	1.0086	CS_F_clk856DDNCtM001_ch2
99	CS_F	clk856DDNCtM001_ch2	25.4	1835.76	1730.22	1.061	CS_F_clk856DDNCtM001_ch2
100	CS_F	clk856DDNCtM001_ch2	25.6	1728.84	1743	0.991874	CS_F_clk856DDNCtM001_ch2
101	CS_F	clk856DDNCtM001_ch2	25.8	1651.41	1755.78	0.94056	CS_F_clk856DDNCtM001_ch2
102	CS_F	clk856DDNCtM001_ch2	26	1593.52	1768.55	0.901031	CS_F_clk856DDNCtM001_ch2
103	CS_F	clk856DDNCtM001_ch2	26.2	1538.29	1781.32	0.863566	CS_F_clk856DDNCtM001_ch2
104	CS_F	clk856DDNCtM001_ch2	26.4	1638.66	1794.09	0.913369	CS_F_clk856DDNCtM001_ch2
105	CS_F	clk856DDNCtM001_ch2	26.6	1490.85	1806.85	0.825109	CS_F_clk856DDNCtM001_ch2
106	CS_F	clk856DDNCtM001_ch2	26.8	1462.52	1819.61	0.803755	CS_F_clk856DDNCtM001_ch2
107	CS_F	clk856DDNCtM001_ch2	27	1557.42	1832.37	0.849949	CS_F_clk856DDNCtM001_ch2
108	CS_F	clk856DDNCtM001_ch2	27.2	1528.36	1845.12	0.828326	CS_F_clk856DDNCtM001_ch2
109	CS_F	clk856DDNCtM001_ch2	27.4	1558.69	1857.88	0.838963	CS_F_clk856DDNCtM001_ch2
110	CS_F	clk856DDNCtM001_ch2	27.6	1617.15	1870.63	0.864497	CS_F_clk856DDNCtM001_ch2
111	CS_F	clk856DDNCtM001_ch2	27.8	1594.17	1883.37	0.846443	CS_F_clk856DDNCtM001_ch2
112	CS_F	clk856DDNCtM001_ch2	28	1710.78	1896.12	0.902253	CS_F_clk856DDNCtM001_ch2
113	CS_F	clk856DDNCtM001_ch2	28.2	1579.9	1908.86	0.827668	CS_F_clk856DDNCtM001_ch2
114	CS_F	clk856DDNCtM001_ch2	28.4	1468.31	1921.6	0.764108	CS_F_clk856DDNCtM001_ch2
115	CS_F	clk856DDNCtM001_ch2	28.6	1515.05	1934.34	0.78324	CS_F_clk856DDNCtM001_ch2
116	CS_F	clk856DDNCtM001_ch2	28.8	1655.64	1947.07	0.850324	CS_F_clk856DDNCtM001_ch2
117	CS_F	clk856DDNCtM001_ch2	29	1673.89	1959.8	0.854109	CS_F_clk856DDNCtM001_ch2
118	CS_F	clk856DDNCtM001_ch2	29.2	1657.64	1972.53	0.840361	CS_F_clk856DDNCtM001_ch2
119	CS_F	clk856DDNCtM001_ch2	29.4	1642.14	1985.26	0.827168	CS_F_clk856DDNCtM001_ch2
120	CS_F	clk856DDNCtM001_ch2	29.6	1707.3	1997.98	0.854512	CS_F_clk856DDNCtM001_ch2
121	CS_F	clk856DDNCtM001_ch2	29.8	1684.21	2010.7	0.837623	CS_F_clk856DDNCtM001_ch2
122	CS_F	clk856DDNCtM001_ch2	30	1696.23	2023.42	0.838296	CS_F_clk856DDNCtM001_ch2
123	CS_F	clk856DDNCtM001_ch3	18	971.612	1254.87	0.774273	CS_F_clk856DDNCtM001_ch3
124	CS_F	clk856DDNCtM001_ch3	18.2	1120.75	1267.79	0.884016	CS_F_clk856DDNCtM001_ch3
125	CS_F	clk856DDNCtM001_ch3	18.4	1091.13	1280.71	0.851971	CS_F_clk856DDNCtM001_ch3
126	CS_F	clk856DDNCtM001_ch3	18.6	1113.5	1293.63	0.860761	CS_F_clk856DDNCtM001_ch3
127	CS_F	clk856DDNCtM001_ch3	18.8	1067.33	1306.54	0.816917	CS_F_clk856DDNCtM001_ch3
128	CS_F	clk856DDNCtM001_ch3	19	1027.93	1319.44	0.779065	CS_F_clk856DDNCtM001_ch3
129	CS_F	clk856DDNCtM001_ch3	19.2	1145.96	1332.34	0.860109	CS_F_clk856DDNCtM001_ch3
130	CS_F	clk856DDNCtM001_ch3	19.4	1068.56	1345.24	0.794329	CS_F_clk856DDNCtM001_ch3
131	CS_F	clk856DDNCtM001_ch3	19.6	1135.15	1358.13	0.83582	CS_F_clk856DDNCtM001_ch3
132	CS_F	clk856DDNCtM001_ch3	19.8	1093.91	1371.01	0.797884	CS_F_clk856DDNCtM001_ch3
133	CS_F	clk856DDNCtM001_ch3	20	1101.75	1383.89	0.796125	CS_F_clk856DDNCtM001_ch3
134	CS_F	clk856DDNCtM001_ch3	20.2	1154.97	1396.77	0.826882	CS_F_clk856DDNCtM001_ch3
135	CS_F	clk856DDNCtM001_ch3	20.4	1186.46	1409.64	0.841674	CS_F_clk856DDNCtM001_ch3
136	CS_F	clk856DDNCtM001_ch3	20.6	1100.49	1422.51	0.773623	CS_F_clk856DDNCtM001_ch3
137	CS_F	clk856DDNCtM001_ch3	20.8	1139.9	1435.38	0.794148	CS_F_clk856DDNCtM001_ch3
138	CS_F	clk856DDNCtM001_ch3	21	1187.64	1448.24	0.820061	CS_F_clk856DDNCtM001_ch3
139	CS_F	clk856DDNCtM001_ch3	21.2	1218.17	1461.09	0.833736	CS_F_clk856DDNCtM001_ch3
140	CS_F	clk856DDNCtM001_ch3	21.4	1211.05	1473.95	0.821636	CS_F_clk856DDNCtM001_ch3
141	CS_F	clk856DDNCtM001_ch3	21.6	1278.53	1486.79	0.859927	CS_F_clk856DDNCtM001_ch3
142	CS_F	clk856DDNCtM001_ch3	21.8	1273.06	1499.64	0.848909	CS_F_clk856DDNCtM001_ch3
143	CS_F	clk856DDNCtM001_ch3	22	1235.08	1512.48	0.816596	CS_F_clk856DDNCtM001_ch3
144	CS_F	clk856DDNCtM001_ch3	22.2	1265.84	1525.32	0.829889	CS_F_clk856DDNCtM001_ch3
145	CS_F	clk856DDNCtM001_ch3	22.4	1214.23	1538.15	0.789409	CS_F_clk856DDNCtM001_ch3
146	CS_F	clk856DDNCtM001_ch3	22.6	1285.62	1550.98	0.828906	CS_F_clk856DDNCtM001_ch3
147	CS_F	clk856DDNCtM001_ch3	22.8	1341.6	1563.8	0.857906	CS_F_clk856DDNCtM001_ch3
148	CS_F	clk856DDNCtM001_ch3	23	1366.42	1576.63	0.866676	CS_F_clk856DDNCtM001_ch3
149	CS_F	clk856DDNCtM001_ch3	23.2	1341.66	1589.44	0.844104	CS_F_clk856DDNCtM001_ch3
150	CS_F	clk856DDNCtM001_ch3	23.4	1475.42	1602.26	0.920839	CS_F_clk856DDNCtM001_ch3
151	CS_F	clk856DDNCtM001_ch3	23.6	1625.07	1615.07	1.00619	CS_F_clk856DDNCtM001_ch3
152	CS_F	clk856DDNCtM001_ch3	23.8	1555.59	1627.88	0.955592	CS_F_clk856DDNCtM001_ch3
153	CS_F	clk856DDNCtM001_ch3	24	1651.93	1640.68	1.00686	CS_F_clk856DDNCtM001_ch3
154	CS_F	clk856DDNCtM001_ch3	24.2	1624.95	1653.48	0.982744	CS_F_clk856DDNCtM001_ch3
155	CS_F	clk856DDNCtM001_ch3	24.4	1658.26	1666.28	0.995187	CS_F_clk856DDNCtM001_ch3
156	CS_F	clk856DDNCtM001_ch3	24.6	1625.08	1679.08	0.967845	CS_F_clk856DDNCtM001_ch3
157	CS_F	clk856DDNCtM001_ch3	24.8	1606.65	1691.87	0.949632	CS_F_clk856DDNCtM001_ch3
158	CS_F	clk856DDNCtM001_ch3	25	1493.44	1704.65	0.876098	CS_F_clk856DDNCtM001_ch3
159	CS_F	clk856DDNCtM001_ch3	25.2	1622.11	1717.44	0.944494	CS_F_clk856DDNCtM001_ch3
160	CS_F	clk856DDNCtM001_ch3	25.4	1540.49	1730.22	0.890342	CS_F_clk856DDNCtM001_ch3
161	CS_F	clk856DDNCtM001_ch3	25.6	1662.93	1743	0.954062	CS_F_clk856DDNCtM001_ch3
162	CS_F	clk856DDNCtM001_ch3	25.8	1565.37	1755.78	0.891554	CS_F_clk856DDNCtM001_ch3
163	CS_F	clk856DDNCtM001_ch3	26	1582.36	1768.55	0.894724	CS_F_clk856DDNCtM001_ch3
164	CS_F	clk856DDNCtM001_ch3	26.2	1541.6	1781.32	0.865424	CS_F_clk856DDNCtM001_ch3
165	CS_F	clk856DDNCtM001_ch3	26.4	1568.87	1794.09	0.874469	CS_F_clk856DDNCtM001_ch3
166	CS_F	clk856DDNCtM001_ch3	26.6	1635.02	1806.85	0.904899	CS_F_clk856DDNCtM001_ch3
167	CS_F	clk856DDNCtM001_ch3	26.8	1510.07	1819.61	0.829884	CS_F_clk856DDNCtM001_ch3
168	CS_F	clk856DDNCtM001_ch3	27	1469.28	1832.37	0.801849	CS_F_clk856DDNCtM001_ch3
169	CS_F	clk856DDNCtM001_ch3	27.2	1496.94	1845.12	0.811293	CS_F_clk856DDNCtM001_ch3
170	CS_F	clk856DDNCtM001_ch3	27.4	1500.42	1857.88	0.807601	CS_F_clk856DDNCtM001_ch3
171	CS_F	clk856DDNCtM001_ch3	27.6	1529.84	1870.63	0.81782	CS_F_clk856DDNCtM001_ch3
172	CS_F	clk856DDNCtM001_ch3	27.8	1573.87	1883.37	0.835664	CS_F_clk856DDNCtM001_ch3
173	CS_F	clk856DDNCtM001_ch3	28	1529.04	1896.12	0.806404	CS_F_clk856DDNCtM001_ch3
174	CS_F	clk856DDNCtM001_ch3	28.2	1756.88	1908.86	0.92038	CS_F_clk856DDNCtM001_ch3
175	CS_F	clk856DDNCtM001_ch3	28.4	1713.65	1921.6	0.891785	CS_F_clk856DDNCtM001_ch3
176	CS_F	clk856DDNCtM001_ch3	28.6	1710.74	1934.34	0.884404	CS_F_clk856DDNCtM001_ch3
177	CS_F	clk856DDNCtM001_ch3	28.8	1615.44	1947.07	0.829677	CS_F_clk856DDNCtM001_ch3
178	CS_F	clk856DDNCtM001_ch3	29	1589.83	1959.8	0.81122	CS_F_clk856DDNCtM001_ch3
179	CS_F	clk856DDNCtM001_ch3	29.2	1629.43	1972.53	0.826058	CS_F_clk856DDNCtM001_ch3
180	CS_F	clk856DDNCtM001_ch3	29.4	1726.72	1985.26	0.869772	CS_F_clk856DDNCtM001_ch3
181	CS_F	clk856DDNCtM001_ch3	29.6	1827.31	1997.98	0.914575	CS_F_clk856DDNCtM001_ch3
182	CS_F	clk856DDNCtM001_ch3	29.8	1682.2	2010.7	0.836621	CS_F_clk856DDNCtM001_ch3
183	CS_F	clk856DDNCtM001_ch3	30	1639.16	2023.42	0.810093	CS_F_clk856DDNCtM001_ch3
184	CS_F	clk856DDNCtM001_ch4	18	1039.86	1254.87	0.828661	CS_F_clk856DDNCtM001_ch4
185	CS_F	clk856DDNCtM001_ch4	18.2	1143.51	1267.79	0.901966	CS_F_clk856DDNCtM001_ch4
186	CS_F	clk856DDNCtM001_ch4	18.4	1143.23	1280.71	0.892654	CS_F_clk856DDNCtM001_ch4
187	CS_F	clk856DDNCtM001_ch4	18.6	988.654	1293.63	0.764249	CS_F_clk856DDNCtM001_ch4
188	CS_F	clk856DDNCtM001_ch4	18.8	1137.5	1306.54	0.870622	CS_F_clk856DDNCtM001_ch4
189	CS_F	clk856DDNCtM001_ch4	19	1064.17	1319.44	0.806527	CS_F_clk856DDNCtM001_ch4
190	CS_F	clk856DDNCtM001_ch4	19.2	1083.72	1332.34	0.813396	CS_F_clk856DDNCtM001_ch4
191	CS_F	clk856DDNCtM001_ch4	19.4	1146.62	1345.24	0.852354	CS_F_clk856DDNCtM001_ch4
192	CS_F	clk856DDNCtM001_ch4	19.6	1084.97	1358.13	0.798872	CS_F_clk856DDNCtM001_ch4
193	CS_F	clk856DDNCtM001_ch4	19.8	1137.27	1371.01	0.829511	CS_F_clk856DDNCtM001_ch4
194	CS_F	clk856DDNCtM001_ch4	20	1134.79	1383.89	0.819994	CS_F_clk856DDNCtM001_ch4
195	CS_F	clk856DDNCtM001_ch4	20.2	1025.06	1396.77	0.733876	CS_F_clk856DDNCtM001_ch4
196	CS_F	clk856DDNCtM001_ch4	20.4	1043.62	1409.64	0.740342	CS_F_clk856DDNCtM001_ch4
197	CS_F	clk856DDNCtM001_ch4	20.6	1171.96	1422.51	0.823868	CS_F_clk856DDNCtM001_ch4
198	CS_F	clk856DDNCtM001_ch4	20.8	1164.94	1435.38	0.811592	CS_F_clk856DDNCtM001_ch4
199	CS_F	clk856DDNCtM001_ch4	21	1165.23	1448.24	0.804583	CS_F_clk856DDNCtM001_ch4
200	CS_F	clk856DDNCtM001_ch4	21.2	1182.86	1461.09	0.80957	CS_F_clk856DDNCtM001_ch4
201	CS_F	clk856DDNCtM001_ch4	21.4	1160.41	1473.95	0.78728	CS_F_clk856DDNCtM001_ch4
202	CS_F	clk856DDNCtM001_ch4	21.6	1370.27	1486.79	0.921626	CS_F_clk856DDNCtM001_ch4
203	CS_F	clk856DDNCtM001_ch4	21.8	1359.44	1499.64	0.906509	CS_F_clk856DDNCtM001_ch4
204	CS_F	clk856DDNCtM001_ch4	22	1092.17	1512.48	0.722103	CS_F_clk856DDNCtM001_ch4
205	CS_F	clk856DDNCtM001_ch4	22.2	1111.34	1525.32	0.728599	CS_F_clk856DDNCtM001_ch4
206	CS_F	clk856DDNCtM001_ch4	22.4	1171.64	1538.15	0.761721	CS_F_clk856DDNCtM001_ch4
207	CS_F	clk856DDNCtM001_ch4	22.6	1260.72	1550.98	0.812858	CS_F_clk856DDNCtM001_ch4
208	CS_F	clk856DDNCtM001_ch4	22.8	1323.28	1563.8	0.846195	CS_F_clk856DDNCtM001_ch4
209	CS_F	clk856DDNCtM001_ch4	23	1314.03	1576.63	0.833443	CS_F_clk856DDNCtM001_ch4
210	CS_F	clk856DDNCtM001_ch4	23.2	1515.9	1589.44	0.95373	CS_F_clk856DDNCtM001_ch4
211	CS_F	clk856DDNCtM001_ch4	23.4	1514.55	1602.26	0.94526	CS_F_clk856DDNCtM001_ch4
212	CS_F	clk856DDNCtM001_ch4	23.6	1586.57	1615.07	0.982355	CS_F_clk856DDNCtM001_ch4
213	CS_F	clk856DDNCtM001_ch4	23.8	1661.67	1627.88	1.02076	CS_F_clk856DDNCtM001_ch4
214	CS_F	clk856DDNCtM001_ch4	24	1679.24	1640.68	1.0235	CS_F_clk856DDNCtM001_ch4
215	CS_F	clk856DDNCtM001_ch4	24.2	1608.56	1653.48	0.97283	CS_F_clk856DDNCtM001_ch4
216	CS_F	clk856DDNCtM001_ch4	24.4	1527.61	1666.28	0.916778	CS_F_clk856DDNCtM001_ch4
217	CS_F	clk856DDNCtM001_ch4	24.6	1493	1679.08	0.889182	CS_F_clk856DDNCtM001_ch4
218	CS_F	clk856DDNCtM001_ch4	24.8	1511.13	1691.87	0.893173	CS_F_clk856DDNCtM001_ch4
219	CS_F	clk856DDNCtM001_ch4	25	1629.03	1704.65	0.955636	CS_F_clk856DDNCtM001_ch4
220	CS_F	clk856DDNCtM001_ch4	25.2	1606.49	1717.44	0.935399	CS_F_clk856DDNCtM001_ch4
221	CS_F	clk856DDNCtM001_ch4	25.4	1565.22	1730.22	0.904636	CS_F_clk856DDNCtM001_ch4
222	CS_F	clk856DDNCtM001_ch4	25.6	1607.68	1743	0.922361	CS_F_clk856DDNCtM001_ch4
223	CS_F	clk856DDNCtM001_ch4	25.8	1650.68	1755.78	0.940143	CS_F_clk856DDNCtM001_ch4
224	CS_F	clk856DDNCtM001_ch4	26	1551.28	1768.55	0.87715	CS_F_clk856DDNCtM001_ch4
225	CS_F	clk856DDNCtM001_ch4	26.2	1539	1781.32	0.863968	CS_F_clk856DDNCtM001_ch4
226	CS_F	clk856DDNCtM001_ch4	26.4	1525.13	1794.09	0.850089	CS_F_clk856DDNCtM001_ch4
227	CS_F	clk856DDNCtM001_ch4	26.6	1724.96	1806.85	0.954679	CS_F_clk856DDNCtM001_ch4
228	CS_F	clk856DDNCtM001_ch4	26.8	1343.04	1819.61	0.738092	CS_F_clk856DDNCtM001_ch4
229	CS_F	clk856DDNCtM001_ch4	27	1432.09	1832.37	0.781552	CS_F_clk856DDNCtM001_ch4
230	CS_F	clk856DDNCtM001_ch4	27.2	1414.06	1845.12	0.766376	CS_F_clk856DDNCtM001_ch4
231	CS_F	clk856DDNCtM001_ch4	27.4	1368.67	1857.88	0.736687	CS_F_clk856DDNCtM001_ch4
232	CS_F	clk856DDNCtM001_ch4	27.6	1424.48	1870.63	0.761497	CS_F_clk856DDNCtM001_ch4
233	CS_F	clk856DDNCtM001_ch4	27.8	1480.33	1883.37	0.785999	CS_F_clk856DDNCtM001_ch4
234	CS_F	clk856DDNCtM001_ch4	28	1483.35	1896.12	0.782306	CS_F_clk856DDNCtM001_ch4
235	CS_F	clk856DDNCtM001_ch4	28.2	1486.09	1908.86	0.77852	CS_F_clk856DDNCtM001_ch4
236	CS_F	clk856DDNCtM001_ch4	28.4	1547.5	1921.6	0.805316	CS_F_clk856DDNCtM001_ch4
237	CS_F	clk856DDNCtM001_ch4	28.6	1655.91	1934.34	0.856059	CS_F_clk856DDNCtM001_ch4
238	CS_F	clk856DDNCtM001_ch4	28.8	1607.13	1947.07	0.825411	CS_F_clk856DDNCtM001_ch4
239	CS_F	clk856DDNCtM001_ch4	29	1727.3	1959.8	0.881364	CS_F_clk856DDNCtM001_ch4
240	CS_F	clk856DDNCtM001_ch4	29.2	1645	1972.53	0.833953	CS_F_clk856DDNCtM001_ch4
241	CS_F	clk856DDNCtM001_ch4	29.4	1687.97	1985.26	0.850254	CS_F_clk856DDNCtM001_ch4
242	CS_F	clk856DDNCtM001_ch4	29.6	1676.72	1997.98	0.839207	CS_F_clk856DDNCtM001_ch4
243	CS_F	clk856DDNCtM001_ch4	29.8	1751.38	2010.7	0.871028	CS_F_clk856DDNCtM001_ch4
244	CS_F	clk856DDNCtM001_ch4	30	1748.96	2023.42	0.864357	CS_F_clk856DDNCtM001_ch4
245	CS_F	clk856DDNCtM001_ch10	18	1006.49	1254.87	0.802067	CS_F_clk856DDNCtM001_ch10
246	CS_F	clk856DDNCtM001_ch10	18.2	1100.74	1267.79	0.868236	CS_F_clk856DDNCtM001_ch10
247	CS_F	clk856DDNCtM001_ch10	18.4	1146.7	1280.71	0.895361	CS_F_clk856DDNCtM001_ch10
248	CS_F	clk856DDNCtM001_ch10	18.6	945.455	1293.63	0.730856	CS_F_clk856DDNCtM001_ch10
249	CS_F	clk856DDNCtM001_ch10	18.8	953.459	1306.54	0.72976	CS_F_clk856DDNCtM001_ch10
250	CS_F	clk856DDNCtM001_ch10	19	995.642	1319.44	0.754593	CS_F_clk856DDNCtM001_ch10
251	CS_F	clk856DDNCtM001_ch10	19.2	999.686	1332.34	0.750322	CS_F_clk856DDNCtM001_ch10
252	CS_F	clk856DDNCtM001_ch10	19.4	1125.02	1345.24	0.836301	CS_F_clk856DDNCtM001_ch10
253	CS_F	clk856DDNCtM001_ch10	19.6	1097.11	1358.13	0.80781	CS_F_clk856DDNCtM001_ch10
254	CS_F	clk856DDNCtM001_ch10	19.8	1103.03	1371.01	0.804539	CS_F_clk856DDNCtM001_ch10
255	CS_F	clk856DDNCtM001_ch10	20	1167.78	1383.89	0.843833	CS_F_clk856DDNCtM001_ch10
256	CS_F	clk856DDNCtM001_ch10	20.2	1085.81	1396.77	0.777369	CS_F_clk856DDNCtM001_ch10
257	CS_F	clk856DDNCtM001_ch10	20.4	1125.38	1409.64	0.798346	CS_F_clk856DDNCtM001_ch10
258	CS_F	clk856DDNCtM001_ch10	20.6	1018.36	1422.51	0.715888	CS_F_clk856DDNCtM001_ch10
259	CS_F	clk856DDNCtM001_ch10	20.8	1083.73	1435.38	0.755011	CS_F_clk856DDNCtM001_ch10
260	CS_F	clk856DDNCtM001_ch10	21	1209.16	1448.24	0.834918	CS_F_clk856DDNCtM001_ch10
261	CS_F	clk856DDNCtM001_ch10	21.2	1217.89	1461.09	0.833549	CS_F_clk856DDNCtM001_ch10
262	CS_F	clk856DDNCtM001_ch10	21.4	1194.72	1473.95	0.81056	CS_F_clk856DDNCtM001_ch10
263	CS_F	clk856DDNCtM001_ch10	21.6	1161.46	1486.79	0.781181	CS_F_clk856DDNCtM001_ch10
264	CS_F	clk856DDNCtM001_ch10	21.8	1201.83	1499.64	0.801411	CS_F_clk856DDNCtM001_ch10
265	CS_F	clk856DDNCtM001_ch10	22	1095.85	1512.48	0.724538	CS_F_clk856DDNCtM001_ch10
266	CS_F	clk856DDNCtM001_ch10	22.2	1178.99	1525.32	0.772948	CS_F_clk856DDNCtM001_ch10
267	CS_F	clk856DDNCtM001_ch10	22.4	1171.11	1538.15	0.761373	CS_F_clk856DDNCtM001_ch10
268	CS_F	clk856DDNCtM001_ch10	22.6	1232.14	1550.98	0.794426	CS_F_clk856DDNCtM001_ch10
269	CS_F	clk856DDNCtM001_ch10	22.8	1242.43	1563.8	0.794495	CS_F_clk856DDNCtM001_ch10
270	CS_F	clk856DDNCtM001_ch10	23	1367.3	1576.63	0.867233	CS_F_clk856DDNCtM001_ch10
271	CS_F	clk856DDNCtM001_ch10	23.2	1407.78	1589.44	0.885703	CS_F_clk856DDNCtM001_ch10
272	CS_F	clk856DDNCtM001_ch10	23.4	1584.04	1602.26	0.98863	CS_F_clk856DDNCtM001_ch10
273	CS_F	clk856DDNCtM001_ch10	23.6	1724.58	1615.07	1.06781	CS_F_clk856DDNCtM001_ch10
274	CS_F	clk856DDNCtM001_ch10	23.8	1717.27	1627.88	1.05491	CS_F_clk856DDNCtM001_ch10
275	CS_F	clk856DDNCtM001_ch10	24	1691.71	1640.68	1.0311	CS_F_clk856DDNCtM001_ch10
276	CS_F	clk856DDNCtM001_ch10	24.2	1555.67	1653.48	0.940844	CS_F_clk856DDNCtM001_ch10
277	CS_F	clk856DDNCtM001_ch10	24.4	1501.54	1666.28	0.901131	CS_F_clk856DDNCtM001_ch10
278	CS_F	clk856DDNCtM001_ch10	24.6	1430.63	1679.08	0.852036	CS_F_clk856DDNCtM001_ch10
279	CS_F	clk856DDNCtM001_ch10	24.8	1509.11	1691.87	0.891981	CS_F_clk856DDNCtM001_ch10
280	CS_F	clk856DDNCtM001_ch10	25	1432.69	1704.65	0.840457	CS_F_clk856DDNCtM001_ch10
281	CS_F	clk856DDNCtM001_ch10	25.2	1428.78	1717.44	0.831924	CS_F_clk856DDNCtM001_ch10
282	CS_F	clk856DDNCtM001_ch10	25.4	1472.07	1730.22	0.8508	CS_F_clk856DDNCtM001_ch10
283	CS_F	clk856DDNCtM001_ch10	25.6	1449.76	1743	0.831764	CS_F_clk856DDNCtM001_ch10
284	CS_F	clk856DDNCtM001_ch10	25.8	1591.17	1755.78	0.906248	CS_F_clk856DDNCtM001_ch10
285	CS_F	clk856DDNCtM001_ch10	26	1529.83	1768.55	0.86502	CS_F_clk856DDNCtM001_ch10
286	CS_F	clk856DDNCtM001_ch10	26.2	1528.33	1781.32	0.857975	CS_F_clk856DDNCtM001_ch10
287	CS_F	clk856DDNCtM001_ch10	26.4	1561.06	1794.09	0.870116	CS_F_clk856DDNCtM001_ch10
288	CS_F	clk856DDNCtM001_ch10	26.6	1490.63	1806.85	0.824989	CS_F_clk856DDNCtM001_ch10
289	CS_F	clk856DDNCtM001_ch10	26.8	1310.48	1819.61	0.720197	CS_F_clk856DDNCtM001_ch10
290	CS_F	clk856DDNCtM001_ch10	27	1371.13	1832.37	0.748284	CS_F_clk856DDNCtM001_ch10
291	CS_F	clk856DDNCtM001_ch10	27.2	1408.39	1845.12	0.763305	CS_F_clk856DDNCtM001_ch10
292	CS_F	clk856DDNCtM001_ch10	27.4	1372.21	1857.88	0.738591	CS_F_clk856DDNCtM001_ch10
293	CS_F	clk856DDNCtM001_ch10	27.6	1367.56	1870.63	0.731072	CS_F_clk856DDNCtM001_ch10
294	CS_F	clk856DDNCtM001_ch10	27.8	1435.04	1883.37	0.76195	CS_F_clk856DDNCtM001_ch10
295	CS_F	clk856DDNCtM001_ch10	28	1460.89	1896.12	0.770465	CS_F_clk856DDNCtM001_ch10
296	CS_F	clk856DDNCtM001_ch10	28.2	1387.63	1908.86	0.72694	CS_F_clk856DDNCtM001_ch10
297	CS_F	clk856DDNCtM001_ch10	28.4	1450.23	1921.6	0.754698	CS_F_clk856DDNCtM001_ch10
298	CS_F	clk856DDNCtM001_ch10	28.6	1459.52	1934.34	0.75453	CS_F_clk856DDNCtM001_ch10
299	CS_F	clk856DDNCtM001_ch10	28.8	1442.27	1947.07	0.74074	CS_F_clk856DDNCtM001_ch10
300	CS_F	clk856DDNCtM001_ch10	29	1604.81	1959.8	0.818862	CS_F_clk856DDNCtM001_ch10
301	CS_F	clk856DDNCtM001_ch10	29.2	1721.97	1972.53	0.872975	CS_F_clk856DDNCtM001_ch10
302	CS_F	clk856DDNCtM001_ch10	29.4	1703.3	1985.26	0.857975	CS_F_clk856DDNCtM001_ch10
303	CS_F	clk856DDNCtM001_ch10	29.6	1712.77	1997.98	0.857249	CS_F_clk856DDNCtM001_ch10
304	CS_F	clk856DDNCtM001_ch10	29.8	1776.98	2010.7	0.883758	CS_F_clk856DDNCtM001_ch10
305	CS_F	clk856DDNCtM001_ch10	30	1808.2	2023.42	0.893632	CS_F_clk856DDNCtM001_ch10
306	CS_F	clk856DDNCtM001_ch11	18	1041.91	1254.87	0.830291	CS_F_clk856DDNCtM001_ch11
307	CS_F	clk856DDNCtM001_ch11	18.2	1114.68	1267.79	0.879228	CS_F_clk856DDNCtM001_ch11
308	CS_F	clk856DDNCtM001_ch11	18.4	1153.52	1280.71	0.900684	CS_F_clk856DDNCtM001_ch11
309	CS_F	clk856DDNCtM001_ch11	18.6	1158.69	1293.63	0.895692	CS_F_clk856DDNCtM001_ch11
310	CS_F	clk856DDNCtM001_ch11	18.8	1094.63	1306.54	0.837812	CS_F_clk856DDNCtM001_ch11
311	CS_F	clk856DDNCtM001_ch11	19	1065.42	1319.44	0.807479	CS_F_clk856DDNCtM001_ch11
312	CS_F	clk856DDNCtM001_ch11	19.2	1119.85	1332.34	0.840516	CS_F_clk856DDNCtM001_ch11
313	CS_F	clk856DDNCtM001_ch11	19.4	1133	1345.24	0.84223	CS_F_clk856DDNCtM001_ch11
314	CS_F	clk856DDNCtM001_ch11	19.6	1135.81	1358.13	0.836304	CS_F_clk856DDNCtM001_ch11
315	CS_F	clk856DDNCtM001_ch11	19.8	1208.96	1371.01	0.881804	CS_F_clk856DDNCtM001_ch11
316	CS_F	clk856DDNCtM001_ch11	20	1133.47	1383.89	0.819043	CS_F_clk856DDNCtM001_ch11
317	CS_F	clk856DDNCtM001_ch11	20.2	1135.12	1396.77	0.812675	CS_F_clk856DDNCtM001_ch11
318	CS_F	clk856DDNCtM001_ch11	20.4	1180.16	1409.64	0.837205	CS_F_clk856DDNCtM001_ch11
319	CS_F	clk856DDNCtM001_ch11	20.6	1163.11	1422.51	0.817641	CS_F_clk856DDNCtM001_ch11
320	CS_F	clk856DDNCtM001_ch11	20.8	1257.76	1435.38	0.876254	CS_F_clk856DDNCtM001_ch11
321	CS_F	clk856DDNCtM001_ch11	21	1267.39	1448.24	0.875124	CS_F_clk856DDNCtM001_ch11
322	CS_F	clk856DDNCtM001_ch11	21.2	1249.5	1461.09	0.855178	CS_F_clk856DDNCtM001_ch11
323	CS_F	clk856DDNCtM001_ch11	21.4	1278.9	1473.95	0.867667	CS_F_clk856DDNCtM001_ch11
324	CS_F	clk856DDNCtM001_ch11	21.6	1276.13	1486.79	0.858308	CS_F_clk856DDNCtM001_ch11
325	CS_F	clk856DDNCtM001_ch11	21.8	1327.26	1499.64	0.885054	CS_F_clk856DDNCtM001_ch11
326	CS_F	clk856DDNCtM001_ch11	22	1252.89	1512.48	0.828371	CS_F_clk856DDNCtM001_ch11
327	CS_F	clk856DDNCtM001_ch11	22.2	1218.31	1525.32	0.798726	CS_F_clk856DDNCtM001_ch11
328	CS_F	clk856DDNCtM001_ch11	22.4	1281.89	1538.15	0.833398	CS_F_clk856DDNCtM001_ch11
329	CS_F	clk856DDNCtM001_ch11	22.6	1256.73	1550.98	0.810283	CS_F_clk856DDNCtM001_ch11
330	CS_F	clk856DDNCtM001_ch11	22.8	1273.92	1563.8	0.814631	CS_F_clk856DDNCtM001_ch11
331	CS_F	clk856DDNCtM001_ch11	23	1279.69	1576.63	0.811663	CS_F_clk856DDNCtM001_ch11
332	CS_F	clk856DDNCtM001_ch11	23.2	1441.58	1589.44	0.906974	CS_F_clk856DDNCtM001_ch11
333	CS_F	clk856DDNCtM001_ch11	23.4	1395.6	1602.26	0.871022	CS_F_clk856DDNCtM001_ch11
334	CS_F	clk856DDNCtM001_ch11	23.6	1464.33	1615.07	0.906666	CS_F_clk856DDNCtM001_ch11
335	CS_F	clk856DDNCtM001_ch11	23.8	1583.74	1627.88	0.972886	CS_F_clk856DDNCtM001_ch11
336	CS_F	clk856DDNCtM001_ch11	24	1530.2	1640.68	0.932663	CS_F_clk856DDNCtM001_ch11
337	CS_F	clk856DDNCtM001_ch11	24.2	1519.75	1653.48	0.919118	CS_F_clk856DDNCtM001_ch11
338	CS_F	clk856DDNCtM001_ch11	24.4	1449.63	1666.28	0.869978	CS_F_clk856DDNCtM001_ch11
339	CS_F	clk856DDNCtM001_ch11	24.6	1431.91	1679.08	0.852794	CS_F_clk856DDNCtM001_ch11
340	CS_F	clk856DDNCtM001_ch11	24.8	1691.96	1691.87	1.00005	CS_F_clk856DDNCtM001_ch11
341	CS_F	clk856DDNCtM001_ch11	25	1450.9	1704.65	0.851139	CS_F_clk856DDNCtM001_ch11
342	CS_F	clk856DDNCtM001_ch11	25.2	1515.3	1717.44	0.882303	CS_F_clk856DDNCtM001_ch11
343	CS_F	clk856DDNCtM001_ch11	25.4	1629.18	1730.22	0.941604	CS_F_clk856DDNCtM001_ch11
344	CS_F	clk856DDNCtM001_ch11	25.6	1528.87	1743	0.877149	CS_F_clk856DDNCtM001_ch11
345	CS_F	clk856DDNCtM001_ch11	25.8	1519.53	1755.78	0.865449	CS_F_clk856DDNCtM001_ch11
346	CS_F	clk856DDNCtM001_ch11	26	1513.34	1768.55	0.855696	CS_F_clk856DDNCtM001_ch11
347	CS_F	clk856DDNCtM001_ch11	26.2	1671.76	1781.32	0.938496	CS_F_clk856DDNCtM001_ch11
348	CS_F	clk856DDNCtM001_ch11	26.4	1583.43	1794.09	0.882582	CS_F_clk856DDNCtM001_ch11
349	CS_F	clk856DDNCtM001_ch11	26.6	1592.66	1806.85	0.881456	CS_F_clk856DDNCtM001_ch11
350	CS_F	clk856DDNCtM001_ch11	26.8	1451.85	1819.61	0.797889	CS_F_clk856DDNCtM001_ch11
351	CS_F	clk856DDNCtM001_ch11	27	1461.64	1832.37	0.79768	CS_F_clk856DDNCtM001_ch11
352	CS_F	clk856DDNCtM001_ch11	27.2	1554.63	1845.12	0.842562	CS_F_clk856DDNCtM001_ch11
353	CS_F	clk856DDNCtM001_ch11	27.4	1586.12	1857.88	0.853726	CS_F_clk856DDNCtM001_ch11
354	CS_F	clk856DDNCtM001_ch11	27.6	1672.48	1870.63	0.894075	CS_F_clk856DDNCtM001_ch11
355	CS_F	clk856DDNCtM001_ch11	27.8	1679.4	1883.37	0.8917	CS_F_clk856DDNCtM001_ch11
356	CS_F	clk856DDNCtM001_ch11	28	1556.66	1896.12	0.820971	CS_F_clk856DDNCtM001_ch11
357	CS_F	clk856DDNCtM001_ch11	28.2	1637.21	1908.86	0.857688	CS_F_clk856DDNCtM001_ch11
358	CS_F	clk856DDNCtM001_ch11	28.4	1622.49	1921.6	0.844345	CS_F_clk856DDNCtM001_ch11
359	CS_F	clk856DDNCtM001_ch11	28.6	1775.96	1934.34	0.918124	CS_F_clk856DDNCtM001_ch11
360	CS_F	clk856DDNCtM001_ch11	28.8	1731.12	1947.07	0.889089	CS_F_clk856DDNCtM001_ch11
361	CS_F	clk856DDNCtM001_ch11	29	1748.72	1959.8	0.892295	CS_F_clk856DDNCtM001_ch11
362	CS_F	clk856DDNCtM001_ch11	29.2	1710.14	1972.53	0.866979	CS_F_clk856DDNCtM001_ch11
363	CS_F	clk856DDNCtM001_ch11	29.4	1838.31	1985.26	0.925981	CS_F_clk856DDNCtM001_ch11
364	CS_F	clk856DDNCtM001_ch11	29.6	1758.33	1997.98	0.880053	CS_F_clk856DDNCtM001_ch11
365	CS_F	clk856DDNCtM001_ch11	29.8	1865.67	2010.7	0.927867	CS_F_clk856DDNCtM001_ch11
366	CS_F	clk856DDNCtM001_ch11	30	1733.61	2023.42	0.856771	CS_F_clk856DDNCtM001_ch11
367	CS_F	clk856DDNCtM001_ch14	18	996.149	1254.87	0.793827	CS_F_clk856DDNCtM001_ch14
368	CS_F	clk856DDNCtM001_ch14	18.2	995.144	1267.79	0.784941	CS_F_clk856DDNCtM001_ch14
369	CS_F	clk856DDNCtM001_ch14	18.4	1032.64	1280.71	0.806304	CS_F_clk856DDNCtM001_ch14
370	CS_F	clk856DDNCtM001_ch14	18.6	970.854	1293.63	0.75049	CS_F_clk856DDNCtM001_ch14
371	CS_F	clk856DDNCtM001_ch14	18.8	1045.88	1306.54	0.800499	CS_F_clk856DDNCtM001_ch14
372	CS_F	clk856DDNCtM001_ch14	19	1017.32	1319.44	0.771027	CS_F_clk856DDNCtM001_ch14
373	CS_F	clk856DDNCtM001_ch14	19.2	1016.12	1332.34	0.762657	CS_F_clk856DDNCtM001_ch14
374	CS_F	clk856DDNCtM001_ch14	19.4	1046.85	1345.24	0.778194	CS_F_clk856DDNCtM001_ch14
375	CS_F	clk856DDNCtM001_ch14	19.6	1143.56	1358.13	0.842016	CS_F_clk856DDNCtM001_ch14
376	CS_F	clk856DDNCtM001_ch14	19.8	1131.75	1371.01	0.825481	CS_F_clk856DDNCtM001_ch14
377	CS_F	clk856DDNCtM001_ch14	20	1179.82	1383.89	0.852533	CS_F_clk856DDNCtM001_ch14
378	CS_F	clk856DDNCtM001_ch14	20.2	1136.4	1396.77	0.813587	CS_F_clk856DDNCtM001_ch14
379	CS_F	clk856DDNCtM001_ch14	20.4	1158.36	1409.64	0.821739	CS_F_clk856DDNCtM001_ch14
380	CS_F	clk856DDNCtM001_ch14	20.6	1139.53	1422.51	0.801068	CS_F_clk856DDNCtM001_ch14
381	CS_F	clk856DDNCtM001_ch14	20.8	1121.08	1435.38	0.781034	CS_F_clk856DDNCtM001_ch14
382	CS_F	clk856DDNCtM001_ch14	21	1207.36	1448.24	0.833675	CS_F_clk856DDNCtM001_ch14
383	CS_F	clk856DDNCtM001_ch14	21.2	1274.55	1461.09	0.872328	CS_F_clk856DDNCtM001_ch14
384	CS_F	clk856DDNCtM001_ch14	21.4	1193.78	1473.95	0.809923	CS_F_clk856DDNCtM001_ch14
385	CS_F	clk856DDNCtM001_ch14	21.6	1300.52	1486.79	0.874713	CS_F_clk856DDNCtM001_ch14
386	CS_F	clk856DDNCtM001_ch14	21.8	1277.35	1499.64	0.851774	CS_F_clk856DDNCtM001_ch14
387	CS_F	clk856DDNCtM001_ch14	22	1197.59	1512.48	0.791807	CS_F_clk856DDNCtM001_ch14
388	CS_F	clk856DDNCtM001_ch14	22.2	1163.86	1525.32	0.763032	CS_F_clk856DDNCtM001_ch14
389	CS_F	clk856DDNCtM001_ch14	22.4	1224.87	1538.15	0.796328	CS_F_clk856DDNCtM001_ch14
390	CS_F	clk856DDNCtM001_ch14	22.6	1309.38	1550.98	0.844232	CS_F_clk856DDNCtM001_ch14
391	CS_F	clk856DDNCtM001_ch14	22.8	1302.27	1563.8	0.832761	CS_F_clk856DDNCtM001_ch14
392	CS_F	clk856DDNCtM001_ch14	23	1378	1576.63	0.874019	CS_F_clk856DDNCtM001_ch14
393	CS_F	clk856DDNCtM001_ch14	23.2	1437.44	1589.44	0.904367	CS_F_clk856DDNCtM001_ch14
394	CS_F	clk856DDNCtM001_ch14	23.4	1505.7	1602.26	0.939736	CS_F_clk856DDNCtM001_ch14
395	CS_F	clk856DDNCtM001_ch14	23.6	1633.18	1615.07	1.01122	CS_F_clk856DDNCtM001_ch14
396	CS_F	clk856DDNCtM001_ch14	23.8	1885.21	1627.88	1.15808	CS_F_clk856DDNCtM001_ch14
397	CS_F	clk856DDNCtM001_ch14	24	1981.01	1640.68	1.20743	CS_F_clk856DDNCtM001_ch14
398	CS_F	clk856DDNCtM001_ch14	24.2	1907.46	1653.48	1.1536	CS_F_clk856DDNCtM001_ch14
399	CS_F	clk856DDNCtM001_ch14	24.4	1818.53	1666.28	1.09137	CS_F_clk856DDNCtM001_ch14
400	CS_F	clk856DDNCtM001_ch14	24.6	1756.9	1679.08	1.04635	CS_F_clk856DDNCtM001_ch14
401	CS_F	clk856DDNCtM001_ch14	24.8	1767.76	1691.87	1.04486	CS_F_clk856DDNCtM001_ch14
402	CS_F	clk856DDNCtM001_ch14	25	1709.47	1704.65	1.00283	CS_F_clk856DDNCtM001_ch14
403	CS_F	clk856DDNCtM001_ch14	25.2	1616.05	1717.44	0.940966	CS_F_clk856DDNCtM001_ch14
404	CS_F	clk856DDNCtM001_ch14	25.4	1673.38	1730.22	0.967146	CS_F_clk856DDNCtM001_ch14
405	CS_F	clk856DDNCtM001_ch14	25.6	1570.81	1743	0.901208	CS_F_clk856DDNCtM001_ch14
406	CS_F	clk856DDNCtM001_ch14	25.8	1581.81	1755.78	0.900916	CS_F_clk856DDNCtM001_ch14
407	CS_F	clk856DDNCtM001_ch14	26	1606.34	1768.55	0.90828	CS_F_clk856DDNCtM001_ch14
408	CS_F	clk856DDNCtM001_ch14	26.2	1504.9	1781.32	0.844824	CS_F_clk856DDNCtM001_ch14
409	CS_F	clk856DDNCtM001_ch14	26.4	1572.4	1794.09	0.876434	CS_F_clk856DDNCtM001_ch14
410	CS_F	clk856DDNCtM001_ch14	26.6	1620.02	1806.85	0.896599	CS_F_clk856DDNCtM001_ch14
411	CS_F	clk856DDNCtM001_ch14	26.8	1468.1	1819.61	0.806818	CS_F_clk856DDNCtM001_ch14
412	CS_F	clk856DDNCtM001_ch14	27	1467.91	1832.37	0.8011	CS_F_clk856DDNCtM001_ch14
413	CS_F	clk856DDNCtM001_ch14	27.2	1480.07	1845.12	0.802153	CS_F_clk856DDNCtM001_ch14
414	CS_F	clk856DDNCtM001_ch14	27.4	1480.61	1857.88	0.796936	CS_F_clk856DDNCtM001_ch14
415	CS_F	clk856DDNCtM001_ch14	27.6	1581.83	1870.63	0.845616	CS_F_clk856DDNCtM001_ch14
416	CS_F	clk856DDNCtM001_ch14	27.8	1675.42	1883.37	0.889584	CS_F_clk856DDNCtM001_ch14
417	CS_F	clk856DDNCtM001_ch14	28	1547.79	1896.12	0.816291	CS_F_clk856DDNCtM001_ch14
418	CS_F	clk856DDNCtM001_ch14	28.2	1593.25	1908.86	0.834659	CS_F_clk856DDNCtM001_ch14
419	CS_F	clk856DDNCtM001_ch14	28.4	1557.94	1921.6	0.81075	CS_F_clk856DDNCtM001_ch14
420	CS_F	clk856DDNCtM001_ch14	28.6	1535.04	1934.34	0.793576	CS_F_clk856DDNCtM001_ch14
421	CS_F	clk856DDNCtM001_ch14	28.8	1641.29	1947.07	0.842954	CS_F_clk856DDNCtM001_ch14
422	CS_F	clk856DDNCtM001_ch14	29	1656.17	1959.8	0.845071	CS_F_clk856DDNCtM001_ch14
423	CS_F	clk856DDNCtM001_ch14	29.2	1664.54	1972.53	0.843861	CS_F_clk856DDNCtM001_ch14
424	CS_F	clk856DDNCtM001_ch14	29.4	1643.59	1985.26	0.827897	CS_F_clk856DDNCtM001_ch14
425	CS_F	clk856DDNCtM001_ch14	29.6	1661.31	1997.98	0.831495	CS_F_clk856DDNCtM001_ch14
426	CS_F	clk856DDNCtM001_ch14	29.8	1733.85	2010.7	0.86231	CS_F_clk856DDNCtM001_ch14
427	CS_F	clk856DDNCtM001_ch14	30	1767.25	2023.42	0.873397	CS_F_clk856DDNCtM001_ch14
428	CS_F	clk856DDNCtM007_ch11	18	947.444	1254.87	0.755014	CS_F_clk856DDNCtM007_ch11
429	CS_F	clk856DDNCtM007_ch11	18.2	1034.66	1267.79	0.816114	CS_F_clk856DDNCtM007_ch11
430	CS_F	clk856DDNCtM007_ch11	18.4	1066.84	1280.71	0.833004	CS_F_clk856DDNCtM007_ch11
431	CS_F	clk856DDNCtM007_ch11	18.6	1027.38	1293.63	0.794189	CS_F_clk856DDNCtM007_ch11
432	CS_F	clk856DDNCtM007_ch11	18.8	1139.16	1306.54	0.871891	CS_F_clk856DDNCtM007_ch11
433	CS_F	clk856DDNCtM007_ch11	19	1053.2	1319.44	0.798215	CS_F_clk856DDNCtM007_ch11
434	CS_F	clk856DDNCtM007_ch11	19.2	1052.99	1332.34	0.790334	CS_F_clk856DDNCtM007_ch11
435	CS_F	clk856DDNCtM007_ch11	19.4	1127.82	1345.24	0.838378	CS_F_clk856DDNCtM007_ch11
436	CS_F	clk856DDNCtM007_ch11	19.6	1098.58	1358.13	0.808891	CS_F_clk856DDNCtM007_ch11
437	CS_F	clk856DDNCtM007_ch11	19.8	1129.19	1371.01	0.823614	CS_F_clk856DDNCtM007_ch11
438	CS_F	clk856DDNCtM007_ch11	20	1091.02	1383.89	0.78837	CS_F_clk856DDNCtM007_ch11
439	CS_F	clk856DDNCtM007_ch11	20.2	1140.53	1396.77	0.816546	CS_F_clk856DDNCtM007_ch11
440	CS_F	clk856DDNCtM007_ch11	20.4	1153.46	1409.64	0.81826	CS_F_clk856DDNCtM007_ch11
441	CS_F	clk856DDNCtM007_ch11	20.6	1151.7	1422.51	0.809625	CS_F_clk856DDNCtM007_ch11
442	CS_F	clk856DDNCtM007_ch11	20.8	1245.15	1435.38	0.867473	CS_F_clk856DDNCtM007_ch11
443	CS_F	clk856DDNCtM007_ch11	21	1262.94	1448.24	0.872053	CS_F_clk856DDNCtM007_ch11
444	CS_F	clk856DDNCtM007_ch11	21.2	1238.36	1461.09	0.847558	CS_F_clk856DDNCtM007_ch11
445	CS_F	clk856DDNCtM007_ch11	21.4	1239.43	1473.95	0.840889	CS_F_clk856DDNCtM007_ch11
446	CS_F	clk856DDNCtM007_ch11	21.6	1356.65	1486.79	0.912466	CS_F_clk856DDNCtM007_ch11
447	CS_F	clk856DDNCtM007_ch11	21.8	1298.43	1499.64	0.865827	CS_F_clk856DDNCtM007_ch11
448	CS_F	clk856DDNCtM007_ch11	22	1241.35	1512.48	0.82074	CS_F_clk856DDNCtM007_ch11
449	CS_F	clk856DDNCtM007_ch11	22.2	1191	1525.32	0.780821	CS_F_clk856DDNCtM007_ch11
450	CS_F	clk856DDNCtM007_ch11	22.4	1279.21	1538.15	0.831658	CS_F_clk856DDNCtM007_ch11
451	CS_F	clk856DDNCtM007_ch11	22.6	1250.58	1550.98	0.806314	CS_F_clk856DDNCtM007_ch11
452	CS_F	clk856DDNCtM007_ch11	22.8	1273.93	1563.8	0.814634	CS_F_clk856DDNCtM007_ch11
453	CS_F	clk856DDNCtM007_ch11	23	1367.87	1576.63	0.867595	CS_F_clk856DDNCtM007_ch11
454	CS_F	clk856DDNCtM007_ch11	23.2	1489.36	1589.44	0.93703	CS_F_clk856DDNCtM007_ch11
455	CS_F	clk856DDNCtM007_ch11	23.4	1663.7	1602.26	1.03835	CS_F_clk856DDNCtM007_ch11
456	CS_F	clk856DDNCtM007_ch11	23.6	1636.76	1615.07	1.01343	CS_F_clk856DDNCtM007_ch11
457	CS_F	clk856DDNCtM007_ch11	23.8	1838.77	1627.88	1.12955	CS_F_clk856DDNCtM007_ch11
458	CS_F	clk856DDNCtM007_ch11	24	1917.55	1640.68	1.16875	CS_F_clk856DDNCtM007_ch11
459	CS_F	clk856DDNCtM007_ch11	24.2	1728.3	1653.48	1.04525	CS_F_clk856DDNCtM007_ch11
460	CS_F	clk856DDNCtM007_ch11	24.4	1692.15	1666.28	1.01552	CS_F_clk856DDNCtM007_ch11
461	CS_F	clk856DDNCtM007_ch11	24.6	1748.2	1679.08	1.04117	CS_F_clk856DDNCtM007_ch11
462	CS_F	clk856DDNCtM007_ch11	24.8	1782.72	1691.87	1.0537	CS_F_clk856DDNCtM007_ch11
463	CS_F	clk856DDNCtM007_ch11	25	1750.52	1704.65	1.02691	CS_F_clk856DDNCtM007_ch11
464	CS_F	clk856DDNCtM007_ch11	25.2	1786.53	1717.44	1.04023	CS_F_clk856DDNCtM007_ch11
465	CS_F	clk856DDNCtM007_ch11	25.4	1683.85	1730.22	0.973199	CS_F_clk856DDNCtM007_ch11
466	CS_F	clk856DDNCtM007_ch11	25.6	1651.69	1743	0.947614	CS_F_clk856DDNCtM007_ch11
467	CS_F	clk856DDNCtM007_ch11	25.8	1646.33	1755.78	0.937666	CS_F_clk856DDNCtM007_ch11
468	CS_F	clk856DDNCtM007_ch11	26	1627.41	1768.55	0.920195	CS_F_clk856DDNCtM007_ch11
469	CS_F	clk856DDNCtM007_ch11	26.2	1630.1	1781.32	0.915111	CS_F_clk856DDNCtM007_ch11
470	CS_F	clk856DDNCtM007_ch11	26.4	1756.52	1794.09	0.979061	CS_F_clk856DDNCtM007_ch11
471	CS_F	clk856DDNCtM007_ch11	26.6	1601.25	1806.85	0.886213	CS_F_clk856DDNCtM007_ch11
472	CS_F	clk856DDNCtM007_ch11	26.8	1493.51	1819.61	0.820783	CS_F_clk856DDNCtM007_ch11
473	CS_F	clk856DDNCtM007_ch11	27	1450.48	1832.37	0.791587	CS_F_clk856DDNCtM007_ch11
474	CS_F	clk856DDNCtM007_ch11	27.2	1495.94	1845.12	0.810755	CS_F_clk856DDNCtM007_ch11
475	CS_F	clk856DDNCtM007_ch11	27.4	1528.52	1857.88	0.822723	CS_F_clk856DDNCtM007_ch11
476	CS_F	clk856DDNCtM007_ch11	27.6	1509.44	1870.63	0.806914	CS_F_clk856DDNCtM007_ch11
477	CS_F	clk856DDNCtM007_ch11	27.8	1513.34	1883.37	0.803525	CS_F_clk856DDNCtM007_ch11
478	CS_F	clk856DDNCtM007_ch11	28	1663.85	1896.12	0.877501	CS_F_clk856DDNCtM007_ch11
479	CS_F	clk856DDNCtM007_ch11	28.2	1559.35	1908.86	0.816898	CS_F_clk856DDNCtM007_ch11
480	CS_F	clk856DDNCtM007_ch11	28.4	1645.37	1921.6	0.85625	CS_F_clk856DDNCtM007_ch11
481	CS_F	clk856DDNCtM007_ch11	28.6	1614.12	1934.34	0.834454	CS_F_clk856DDNCtM007_ch11
482	CS_F	clk856DDNCtM007_ch11	28.8	1712.34	1947.07	0.879442	CS_F_clk856DDNCtM007_ch11
483	CS_F	clk856DDNCtM007_ch11	29	1668.42	1959.8	0.851321	CS_F_clk856DDNCtM007_ch11
484	CS_F	clk856DDNCtM007_ch11	29.2	1752.93	1972.53	0.888671	CS_F_clk856DDNCtM007_ch11
485	CS_F	clk856DDNCtM007_ch11	29.4	1675.3	1985.26	0.843868	CS_F_clk856DDNCtM007_ch11
486	CS_F	clk856DDNCtM007_ch11	29.6	1702.23	1997.98	0.851972	CS_F_clk856DDNCtM007_ch11
487	CS_F	clk856DDNCtM007_ch11	29.8	1723.02	2010.7	0.856923	CS_F_clk856DDNCtM007_ch11
488	CS_F	clk856DDNCtM007_ch11	30	1708.13	2023.42	0.84418	CS_F_clk856DDNCtM007_ch11
489	CS_F	clk856DDNCtM007_ch12	18	1059.22	1254.87	0.844086	CS_F_clk856DDNCtM007_ch12
490	CS_F	clk856DDNCtM007_ch12	18.2	1071.02	1267.79	0.844788	CS_F_clk856DDNCtM007_ch12
491	CS_F	clk856DDNCtM007_ch12	18.4	1117.38	1280.71	0.872467	CS_F_clk856DDNCtM007_ch12
492	CS_F	clk856DDNCtM007_ch12	18.6	992.761	1293.63	0.767424	CS_F_clk856DDNCtM007_ch12
493	CS_F	clk856DDNCtM007_ch12	18.8	1057.67	1306.54	0.809523	CS_F_clk856DDNCtM007_ch12
494	CS_F	clk856DDNCtM007_ch12	19	1141.79	1319.44	0.865357	CS_F_clk856DDNCtM007_ch12
495	CS_F	clk856DDNCtM007_ch12	19.2	1055.34	1332.34	0.792095	CS_F_clk856DDNCtM007_ch12
496	CS_F	clk856DDNCtM007_ch12	19.4	1131.71	1345.24	0.841274	CS_F_clk856DDNCtM007_ch12
497	CS_F	clk856DDNCtM007_ch12	19.6	1089.94	1358.13	0.802529	CS_F_clk856DDNCtM007_ch12
498	CS_F	clk856DDNCtM007_ch12	19.8	1140.64	1371.01	0.831971	CS_F_clk856DDNCtM007_ch12
499	CS_F	clk856DDNCtM007_ch12	20	1207.47	1383.89	0.872513	CS_F_clk856DDNCtM007_ch12
500	CS_F	clk856DDNCtM007_ch12	20.2	1115.93	1396.77	0.798936	CS_F_clk856DDNCtM007_ch12
501	CS_F	clk856DDNCtM007_ch12	20.4	1134.68	1409.64	0.804941	CS_F_clk856DDNCtM007_ch12
502	CS_F	clk856DDNCtM007_ch12	20.6	1144.28	1422.51	0.804408	CS_F_clk856DDNCtM007_ch12
503	CS_F	clk856DDNCtM007_ch12	20.8	1187.04	1435.38	0.826985	CS_F_clk856DDNCtM007_ch12
504	CS_F	clk856DDNCtM007_ch12	21	1169.85	1448.24	0.807772	CS_F_clk856DDNCtM007_ch12
505	CS_F	clk856DDNCtM007_ch12	21.2	1245.86	1461.09	0.852689	CS_F_clk856DDNCtM007_ch12
506	CS_F	clk856DDNCtM007_ch12	21.4	1261.2	1473.95	0.855663	CS_F_clk856DDNCtM007_ch12
507	CS_F	clk856DDNCtM007_ch12	21.6	1217.23	1486.79	0.818695	CS_F_clk856DDNCtM007_ch12
508	CS_F	clk856DDNCtM007_ch12	21.8	1353.15	1499.64	0.902316	CS_F_clk856DDNCtM007_ch12
509	CS_F	clk856DDNCtM007_ch12	22	1254.23	1512.48	0.829256	CS_F_clk856DDNCtM007_ch12
510	CS_F	clk856DDNCtM007_ch12	22.2	1303.25	1525.32	0.854412	CS_F_clk856DDNCtM007_ch12
511	CS_F	clk856DDNCtM007_ch12	22.4	1284.2	1538.15	0.834901	CS_F_clk856DDNCtM007_ch12
512	CS_F	clk856DDNCtM007_ch12	22.6	1423.57	1550.98	0.917851	CS_F_clk856DDNCtM007_ch12
513	CS_F	clk856DDNCtM007_ch12	22.8	1344.88	1563.8	0.860009	CS_F_clk856DDNCtM007_ch12
514	CS_F	clk856DDNCtM007_ch12	23	1424.96	1576.63	0.903807	CS_F_clk856DDNCtM007_ch12
515	CS_F	clk856DDNCtM007_ch12	23.2	1551.19	1589.44	0.975935	CS_F_clk856DDNCtM007_ch12
516	CS_F	clk856DDNCtM007_ch12	23.4	1611.88	1602.26	1.00601	CS_F_clk856DDNCtM007_ch12
517	CS_F	clk856DDNCtM007_ch12	23.6	1712.96	1615.07	1.06061	CS_F_clk856DDNCtM007_ch12
518	CS_F	clk856DDNCtM007_ch12	23.8	1727.99	1627.88	1.0615	CS_F_clk856DDNCtM007_ch12
519	CS_F	clk856DDNCtM007_ch12	24	1760.34	1640.68	1.07293	CS_F_clk856DDNCtM007_ch12
520	CS_F	clk856DDNCtM007_ch12	24.2	1662.33	1653.48	1.00535	CS_F_clk856DDNCtM007_ch12
521	CS_F	clk856DDNCtM007_ch12	24.4	1636.47	1666.28	0.982108	CS_F_clk856DDNCtM007_ch12
522	CS_F	clk856DDNCtM007_ch12	24.6	1580.87	1679.08	0.94151	CS_F_clk856DDNCtM007_ch12
523	CS_F	clk856DDNCtM007_ch12	24.8	1492.98	1691.87	0.882446	CS_F_clk856DDNCtM007_ch12
524	CS_F	clk856DDNCtM007_ch12	25	1548.81	1704.65	0.90858	CS_F_clk856DDNCtM007_ch12
525	CS_F	clk856DDNCtM007_ch12	25.2	1425.71	1717.44	0.830135	CS_F_clk856DDNCtM007_ch12
526	CS_F	clk856DDNCtM007_ch12	25.4	1483.3	1730.22	0.857289	CS_F_clk856DDNCtM007_ch12
527	CS_F	clk856DDNCtM007_ch12	25.6	1525.41	1743	0.875165	CS_F_clk856DDNCtM007_ch12
528	CS_F	clk856DDNCtM007_ch12	25.8	1496.12	1755.78	0.852111	CS_F_clk856DDNCtM007_ch12
529	CS_F	clk856DDNCtM007_ch12	26	1518.9	1768.55	0.858838	CS_F_clk856DDNCtM007_ch12
530	CS_F	clk856DDNCtM007_ch12	26.2	1521.76	1781.32	0.85429	CS_F_clk856DDNCtM007_ch12
531	CS_F	clk856DDNCtM007_ch12	26.4	1524.72	1794.09	0.84986	CS_F_clk856DDNCtM007_ch12
532	CS_F	clk856DDNCtM007_ch12	26.6	1469.05	1806.85	0.813042	CS_F_clk856DDNCtM007_ch12
533	CS_F	clk856DDNCtM007_ch12	26.8	1502.86	1819.61	0.825922	CS_F_clk856DDNCtM007_ch12
534	CS_F	clk856DDNCtM007_ch12	27	1468.12	1832.37	0.801212	CS_F_clk856DDNCtM007_ch12
535	CS_F	clk856DDNCtM007_ch12	27.2	1534.1	1845.12	0.831437	CS_F_clk856DDNCtM007_ch12
536	CS_F	clk856DDNCtM007_ch12	27.4	1556.59	1857.88	0.837831	CS_F_clk856DDNCtM007_ch12
537	CS_F	clk856DDNCtM007_ch12	27.6	1567.13	1870.63	0.837754	CS_F_clk856DDNCtM007_ch12
538	CS_F	clk856DDNCtM007_ch12	27.8	1522.79	1883.37	0.808542	CS_F_clk856DDNCtM007_ch12
539	CS_F	clk856DDNCtM007_ch12	28	1616.63	1896.12	0.852601	CS_F_clk856DDNCtM007_ch12
540	CS_F	clk856DDNCtM007_ch12	28.2	1614.68	1908.86	0.845886	CS_F_clk856DDNCtM007_ch12
541	CS_F	clk856DDNCtM007_ch12	28.4	1580.53	1921.6	0.822507	CS_F_clk856DDNCtM007_ch12
542	CS_F	clk856DDNCtM007_ch12	28.6	1590.46	1934.34	0.822223	CS_F_clk856DDNCtM007_ch12
543	CS_F	clk856DDNCtM007_ch12	28.8	1639.33	1947.07	0.841949	CS_F_clk856DDNCtM007_ch12
544	CS_F	clk856DDNCtM007_ch12	29	1697.92	1959.8	0.866371	CS_F_clk856DDNCtM007_ch12
545	CS_F	clk856DDNCtM007_ch12	29.2	1714.96	1972.53	0.869423	CS_F_clk856DDNCtM007_ch12
546	CS_F	clk856DDNCtM007_ch12	29.4	1697.13	1985.26	0.854866	CS_F_clk856DDNCtM007_ch12
547	CS_F	clk856DDNCtM007_ch12	29.6	1766.63	1997.98	0.884207	CS_F_clk856DDNCtM007_ch12
548	CS_F	clk856DDNCtM007_ch12	29.8	1754.08	2010.7	0.872371	CS_F_clk856DDNCtM007_ch12
549	CS_F	clk856DDNCtM007_ch12	30	1763.82	2023.42	0.871702	CS_F_clk856DDNCtM007_ch12
550	CS_F	clk856DDNCtM007_ch14	18	1077.12	1254.87	0.858355	CS_F_clk856DDNCtM007_ch14
551	CS_F	clk856DDNCtM007_ch14	18.2	1053.01	1267.79	0.830587	CS_F_clk856DDNCtM007_ch14
552	CS_F	clk856DDNCtM007_ch14	18.4	1057.16	1280.71	0.82545	CS_F_clk856DDNCtM007_ch14
553	CS_F	clk856DDNCtM007_ch14	18.6	1166.62	1293.63	0.901824	CS_F_clk856DDNCtM007_ch14
554	CS_F	clk856DDNCtM007_ch14	18.8	1018.95	1306.54	0.779888	CS_F_clk856DDNCtM007_ch14
555	CS_F	clk856DDNCtM007_ch14	19	1111.95	1319.44	0.842743	CS_F_clk856DDNCtM007_ch14
556	CS_F	clk856DDNCtM007_ch14	19.2	1111.69	1332.34	0.83439	CS_F_clk856DDNCtM007_ch14
557	CS_F	clk856DDNCtM007_ch14	19.4	1094.75	1345.24	0.813801	CS_F_clk856DDNCtM007_ch14
558	CS_F	clk856DDNCtM007_ch14	19.6	1173.07	1358.13	0.863739	CS_F_clk856DDNCtM007_ch14
559	CS_F	clk856DDNCtM007_ch14	19.8	1122.31	1371.01	0.8186	CS_F_clk856DDNCtM007_ch14
560	CS_F	clk856DDNCtM007_ch14	20	1218.51	1383.89	0.880495	CS_F_clk856DDNCtM007_ch14
561	CS_F	clk856DDNCtM007_ch14	20.2	1114.53	1396.77	0.797935	CS_F_clk856DDNCtM007_ch14
562	CS_F	clk856DDNCtM007_ch14	20.4	1071.04	1409.64	0.759797	CS_F_clk856DDNCtM007_ch14
563	CS_F	clk856DDNCtM007_ch14	20.6	1126.55	1422.51	0.791942	CS_F_clk856DDNCtM007_ch14
564	CS_F	clk856DDNCtM007_ch14	20.8	1147.47	1435.38	0.799418	CS_F_clk856DDNCtM007_ch14
565	CS_F	clk856DDNCtM007_ch14	21	1310.27	1448.24	0.904736	CS_F_clk856DDNCtM007_ch14
566	CS_F	clk856DDNCtM007_ch14	21.2	1272.14	1461.09	0.870674	CS_F_clk856DDNCtM007_ch14
567	CS_F	clk856DDNCtM007_ch14	21.4	1248.85	1473.95	0.847286	CS_F_clk856DDNCtM007_ch14
568	CS_F	clk856DDNCtM007_ch14	21.6	1232.37	1486.79	0.828879	CS_F_clk856DDNCtM007_ch14
569	CS_F	clk856DDNCtM007_ch14	21.8	1237.34	1499.64	0.825089	CS_F_clk856DDNCtM007_ch14
570	CS_F	clk856DDNCtM007_ch14	22	1156.35	1512.48	0.764542	CS_F_clk856DDNCtM007_ch14
571	CS_F	clk856DDNCtM007_ch14	22.2	1283.66	1525.32	0.841573	CS_F_clk856DDNCtM007_ch14
572	CS_F	clk856DDNCtM007_ch14	22.4	1220	1538.15	0.793161	CS_F_clk856DDNCtM007_ch14
573	CS_F	clk856DDNCtM007_ch14	22.6	1233.77	1550.98	0.795481	CS_F_clk856DDNCtM007_ch14
574	CS_F	clk856DDNCtM007_ch14	22.8	1234.16	1563.8	0.789205	CS_F_clk856DDNCtM007_ch14
575	CS_F	clk856DDNCtM007_ch14	23	1440.83	1576.63	0.913867	CS_F_clk856DDNCtM007_ch14
576	CS_F	clk856DDNCtM007_ch14	23.2	1535.44	1589.44	0.966025	CS_F_clk856DDNCtM007_ch14
577	CS_F	clk856DDNCtM007_ch14	23.4	1588.31	1602.26	0.991298	CS_F_clk856DDNCtM007_ch14
578	CS_F	clk856DDNCtM007_ch14	23.6	1512.71	1615.07	0.936623	CS_F_clk856DDNCtM007_ch14
579	CS_F	clk856DDNCtM007_ch14	23.8	1543.26	1627.88	0.948021	CS_F_clk856DDNCtM007_ch14
580	CS_F	clk856DDNCtM007_ch14	24	1718.4	1640.68	1.04737	CS_F_clk856DDNCtM007_ch14
581	CS_F	clk856DDNCtM007_ch14	24.2	1412.95	1653.48	0.854527	CS_F_clk856DDNCtM007_ch14
582	CS_F	clk856DDNCtM007_ch14	24.4	1486.28	1666.28	0.891977	CS_F_clk856DDNCtM007_ch14
583	CS_F	clk856DDNCtM007_ch14	24.6	1519.42	1679.08	0.904918	CS_F_clk856DDNCtM007_ch14
584	CS_F	clk856DDNCtM007_ch14	24.8	1549.48	1691.87	0.915838	CS_F_clk856DDNCtM007_ch14
585	CS_F	clk856DDNCtM007_ch14	25	1435.32	1704.65	0.841998	CS_F_clk856DDNCtM007_ch14
586	CS_F	clk856DDNCtM007_ch14	25.2	1481.52	1717.44	0.862631	CS_F_clk856DDNCtM007_ch14
587	CS_F	clk856DDNCtM007_ch14	25.4	1453.75	1730.22	0.84021	CS_F_clk856DDNCtM007_ch14
588	CS_F	clk856DDNCtM007_ch14	25.6	1482.27	1743	0.850414	CS_F_clk856DDNCtM007_ch14
589	CS_F	clk856DDNCtM007_ch14	25.8	1563.71	1755.78	0.890606	CS_F_clk856DDNCtM007_ch14
590	CS_F	clk856DDNCtM007_ch14	26	1440.99	1768.55	0.814784	CS_F_clk856DDNCtM007_ch14
591	CS_F	clk856DDNCtM007_ch14	26.2	1575.6	1781.32	0.884515	CS_F_clk856DDNCtM007_ch14
592	CS_F	clk856DDNCtM007_ch14	26.4	1533.52	1794.09	0.854766	CS_F_clk856DDNCtM007_ch14
593	CS_F	clk856DDNCtM007_ch14	26.6	1543.2	1806.85	0.854083	CS_F_clk856DDNCtM007_ch14
594	CS_F	clk856DDNCtM007_ch14	26.8	1481.25	1819.61	0.814049	CS_F_clk856DDNCtM007_ch14
595	CS_F	clk856DDNCtM007_ch14	27	1441.78	1832.37	0.786841	CS_F_clk856DDNCtM007_ch14
596	CS_F	clk856DDNCtM007_ch14	27.2	1492.69	1845.12	0.80899	CS_F_clk856DDNCtM007_ch14
597	CS_F	clk856DDNCtM007_ch14	27.4	1491.92	1857.88	0.803021	CS_F_clk856DDNCtM007_ch14
598	CS_F	clk856DDNCtM007_ch14	27.6	1485.58	1870.63	0.794163	CS_F_clk856DDNCtM007_ch14
599	CS_F	clk856DDNCtM007_ch14	27.8	1591.53	1883.37	0.845044	CS_F_clk856DDNCtM007_ch14
600	CS_F	clk856DDNCtM007_ch14	28	1573.32	1896.12	0.829758	CS_F_clk856DDNCtM007_ch14
601	CS_F	clk856DDNCtM007_ch14	28.2	1606.75	1908.86	0.841734	CS_F_clk856DDNCtM007_ch14
602	CS_F	clk856DDNCtM007_ch14	28.4	1578.32	1921.6	0.821359	CS_F_clk856DDNCtM007_ch14
603	CS_F	clk856DDNCtM007_ch14	28.6	1695.19	1934.34	0.876369	CS_F_clk856DDNCtM007_ch14
604	CS_F	clk856DDNCtM007_ch14	28.8	1754.01	1947.07	0.900846	CS_F_clk856DDNCtM007_ch14
605	CS_F	clk856DDNCtM007_ch14	29	1742.85	1959.8	0.889301	CS_F_clk856DDNCtM007_ch14
606	CS_F	clk856DDNCtM007_ch14	29.2	1686.29	1972.53	0.854884	CS_F_clk856DDNCtM007_ch14
607	CS_F	clk856DDNCtM007_ch14	29.4	1716.73	1985.26	0.864741	CS_F_clk856DDNCtM007_ch14
608	CS_F	clk856DDNCtM007_ch14	29.6	1731.34	1997.98	0.866544	CS_F_clk856DDNCtM007_ch14
609	CS_F	clk856DDNCtM007_ch14	29.8	1781.57	2010.7	0.886045	CS_F_clk856DDNCtM007_ch14
610	CS_F	clk856DDNCtM007_ch14	30	1831.07	2023.42	0.904939	CS_F_clk856DDNCtM007_ch14
611	CS_F	clk856DDNCtM007_ch16	18	1034	1254.87	0.823987	CS_F_clk856DDNCtM007_ch16
612	CS_F	clk856DDNCtM007_ch16	18.2	1063.37	1267.79	0.838756	CS_F_clk856DDNCtM007_ch16
613	CS_F	clk856DDNCtM007_ch16	18.4	1016.51	1280.71	0.793702	CS_F_clk856DDNCtM007_ch16
614	CS_F	clk856DDNCtM007_ch16	18.6	930.353	1293.63	0.719182	CS_F_clk856DDNCtM007_ch16
615	CS_F	clk856DDNCtM007_ch16	18.8	1083.91	1306.54	0.829605	CS_F_clk856DDNCtM007_ch16
616	CS_F	clk856DDNCtM007_ch16	19	1045.42	1319.44	0.792316	CS_F_clk856DDNCtM007_ch16
617	CS_F	clk856DDNCtM007_ch16	19.2	1197.81	1332.34	0.899027	CS_F_clk856DDNCtM007_ch16
618	CS_F	clk856DDNCtM007_ch16	19.4	1096.96	1345.24	0.815441	CS_F_clk856DDNCtM007_ch16
619	CS_F	clk856DDNCtM007_ch16	19.6	1145.91	1358.13	0.843744	CS_F_clk856DDNCtM007_ch16
620	CS_F	clk856DDNCtM007_ch16	19.8	1067.81	1371.01	0.778846	CS_F_clk856DDNCtM007_ch16
621	CS_F	clk856DDNCtM007_ch16	20	1215.85	1383.89	0.878571	CS_F_clk856DDNCtM007_ch16
622	CS_F	clk856DDNCtM007_ch16	20.2	1057.35	1396.77	0.756996	CS_F_clk856DDNCtM007_ch16
623	CS_F	clk856DDNCtM007_ch16	20.4	1209.5	1409.64	0.858015	CS_F_clk856DDNCtM007_ch16
624	CS_F	clk856DDNCtM007_ch16	20.6	1148.1	1422.51	0.807094	CS_F_clk856DDNCtM007_ch16
625	CS_F	clk856DDNCtM007_ch16	20.8	1174.27	1435.38	0.818091	CS_F_clk856DDNCtM007_ch16
626	CS_F	clk856DDNCtM007_ch16	21	1247.44	1448.24	0.86135	CS_F_clk856DDNCtM007_ch16
627	CS_F	clk856DDNCtM007_ch16	21.2	1152.8	1461.09	0.788996	CS_F_clk856DDNCtM007_ch16
628	CS_F	clk856DDNCtM007_ch16	21.4	1228.36	1473.95	0.83338	CS_F_clk856DDNCtM007_ch16
629	CS_F	clk856DDNCtM007_ch16	21.6	1237.38	1486.79	0.832245	CS_F_clk856DDNCtM007_ch16
630	CS_F	clk856DDNCtM007_ch16	21.8	1279.13	1499.64	0.852962	CS_F_clk856DDNCtM007_ch16
631	CS_F	clk856DDNCtM007_ch16	22	1169.95	1512.48	0.773531	CS_F_clk856DDNCtM007_ch16
632	CS_F	clk856DDNCtM007_ch16	22.2	1177.19	1525.32	0.771769	CS_F_clk856DDNCtM007_ch16
633	CS_F	clk856DDNCtM007_ch16	22.4	1247.47	1538.15	0.811019	CS_F_clk856DDNCtM007_ch16
634	CS_F	clk856DDNCtM007_ch16	22.6	1339.11	1550.98	0.863395	CS_F_clk856DDNCtM007_ch16
635	CS_F	clk856DDNCtM007_ch16	22.8	1395.39	1563.8	0.892307	CS_F_clk856DDNCtM007_ch16
636	CS_F	clk856DDNCtM007_ch16	23	1476.91	1576.63	0.936751	CS_F_clk856DDNCtM007_ch16
637	CS_F	clk856DDNCtM007_ch16	23.2	1616.33	1589.44	1.01692	CS_F_clk856DDNCtM007_ch16
638	CS_F	clk856DDNCtM007_ch16	23.4	1715.67	1602.26	1.07078	CS_F_clk856DDNCtM007_ch16
639	CS_F	clk856DDNCtM007_ch16	23.6	1971.26	1615.07	1.22054	CS_F_clk856DDNCtM007_ch16
640	CS_F	clk856DDNCtM007_ch16	23.8	2245.53	1627.88	1.37942	CS_F_clk856DDNCtM007_ch16
641	CS_F	clk856DDNCtM007_ch16	24	2343.81	1640.68	1.42856	CS_F_clk856DDNCtM007_ch16
642	CS_F	clk856DDNCtM007_ch16	24.2	1961.06	1653.48	1.18602	CS_F_clk856DDNCtM007_ch16
643	CS_F	clk856DDNCtM007_ch16	24.4	1846.71	1666.28	1.10829	CS_F_clk856DDNCtM007_ch16
644	CS_F	clk856DDNCtM007_ch16	24.6	1780.38	1679.08	1.06034	CS_F_clk856DDNCtM007_ch16
645	CS_F	clk856DDNCtM007_ch16	24.8	1691.73	1691.87	0.999921	CS_F_clk856DDNCtM007_ch16
646	CS_F	clk856DDNCtM007_ch16	25	1616.69	1704.65	0.948397	CS_F_clk856DDNCtM007_ch16
647	CS_F	clk856DDNCtM007_ch16	25.2	1653.27	1717.44	0.962634	CS_F_clk856DDNCtM007_ch16
648	CS_F	clk856DDNCtM007_ch16	25.4	1541.79	1730.22	0.891094	CS_F_clk856DDNCtM007_ch16
649	CS_F	clk856DDNCtM007_ch16	25.6	1607.85	1743	0.922458	CS_F_clk856DDNCtM007_ch16
650	CS_F	clk856DDNCtM007_ch16	25.8	1499.84	1755.78	0.854232	CS_F_clk856DDNCtM007_ch16
651	CS_F	clk856DDNCtM007_ch16	26	1550.34	1768.55	0.876616	CS_F_clk856DDNCtM007_ch16
652	CS_F	clk856DDNCtM007_ch16	26.2	1422.71	1781.32	0.798684	CS_F_clk856DDNCtM007_ch16
653	CS_F	clk856DDNCtM007_ch16	26.4	1413.98	1794.09	0.788132	CS_F_clk856DDNCtM007_ch16
654	CS_F	clk856DDNCtM007_ch16	26.6	1497.68	1806.85	0.828888	CS_F_clk856DDNCtM007_ch16
655	CS_F	clk856DDNCtM007_ch16	26.8	1338.32	1819.61	0.735497	CS_F_clk856DDNCtM007_ch16
656	CS_F	clk856DDNCtM007_ch16	27	1421.02	1832.37	0.775511	CS_F_clk856DDNCtM007_ch16
657	CS_F	clk856DDNCtM007_ch16	27.2	1461.8	1845.12	0.792252	CS_F_clk856DDNCtM007_ch16
658	CS_F	clk856DDNCtM007_ch16	27.4	1401.96	1857.88	0.754603	CS_F_clk856DDNCtM007_ch16
659	CS_F	clk856DDNCtM007_ch16	27.6	1424.28	1870.63	0.761393	CS_F_clk856DDNCtM007_ch16
660	CS_F	clk856DDNCtM007_ch16	27.8	1455.82	1883.37	0.772987	CS_F_clk856DDNCtM007_ch16
661	CS_F	clk856DDNCtM007_ch16	28	1626.83	1896.12	0.857978	CS_F_clk856DDNCtM007_ch16
662	CS_F	clk856DDNCtM007_ch16	28.2	1516.76	1908.86	0.79459	CS_F_clk856DDNCtM007_ch16
663	CS_F	clk856DDNCtM007_ch16	28.4	1604.33	1921.6	0.834894	CS_F_clk856DDNCtM007_ch16
664	CS_F	clk856DDNCtM007_ch16	28.6	1562.89	1934.34	0.807972	CS_F_clk856DDNCtM007_ch16
665	CS_F	clk856DDNCtM007_ch16	28.8	1609.72	1947.07	0.826739	CS_F_clk856DDNCtM007_ch16
666	CS_F	clk856DDNCtM007_ch16	29	1645.32	1959.8	0.839533	CS_F_clk856DDNCtM007_ch16
667	CS_F	clk856DDNCtM007_ch16	29.2	1569.43	1972.53	0.79564	CS_F_clk856DDNCtM007_ch16
668	CS_F	clk856DDNCtM007_ch16	29.4	1733.25	1985.26	0.873058	CS_F_clk856DDNCtM007_ch16
669	CS_F	clk856DDNCtM007_ch16	29.6	1693.35	1997.98	0.84753	CS_F_clk856DDNCtM007_ch16
670	CS_F	clk856DDNCtM007_ch16	29.8	1749.14	2010.7	0.869914	CS_F_clk856DDNCtM007_ch16
671	CS_F	clk856DDNCtM007_ch16	30	1779.47	2023.42	0.879433	CS_F_clk856DDNCtM007_ch16
672	CS_F	clk856DDNCtM007_ch19	18	1017.04	1254.87	0.810471	CS_F_clk856DDNCtM007_ch19
673	CS_F	clk856DDNCtM007_ch19	18.2	1114.89	1267.79	0.879396	CS_F_clk856DDNCtM007_ch19
674	CS_F	clk856DDNCtM007_ch19	18.4	1088.1	1280.71	0.849608	CS_F_clk856DDNCtM007_ch19
675	CS_F	clk856DDNCtM007_ch19	18.6	1077.14	1293.63	0.832654	CS_F_clk856DDNCtM007_ch19
676	CS_F	clk856DDNCtM007_ch19	18.8	1104.99	1306.54	0.84574	CS_F_clk856DDNCtM007_ch19
677	CS_F	clk856DDNCtM007_ch19	19	918.161	1319.44	0.695871	CS_F_clk856DDNCtM007_ch19
678	CS_F	clk856DDNCtM007_ch19	19.2	1120.81	1332.34	0.841232	CS_F_clk856DDNCtM007_ch19
679	CS_F	clk856DDNCtM007_ch19	19.4	1185.98	1345.24	0.881617	CS_F_clk856DDNCtM007_ch19
680	CS_F	clk856DDNCtM007_ch19	19.6	1236.48	1358.13	0.910431	CS_F_clk856DDNCtM007_ch19
681	CS_F	clk856DDNCtM007_ch19	19.8	1215.28	1371.01	0.88641	CS_F_clk856DDNCtM007_ch19
682	CS_F	clk856DDNCtM007_ch19	20	1208.88	1383.89	0.873531	CS_F_clk856DDNCtM007_ch19
683	CS_F	clk856DDNCtM007_ch19	20.2	1024.49	1396.77	0.733472	CS_F_clk856DDNCtM007_ch19
684	CS_F	clk856DDNCtM007_ch19	20.4	1155.12	1409.64	0.819439	CS_F_clk856DDNCtM007_ch19
685	CS_F	clk856DDNCtM007_ch19	20.6	1160.19	1422.51	0.81559	CS_F_clk856DDNCtM007_ch19
686	CS_F	clk856DDNCtM007_ch19	20.8	1147.22	1435.38	0.799244	CS_F_clk856DDNCtM007_ch19
687	CS_F	clk856DDNCtM007_ch19	21	1195.51	1448.24	0.825494	CS_F_clk856DDNCtM007_ch19
688	CS_F	clk856DDNCtM007_ch19	21.2	1210.74	1461.09	0.828651	CS_F_clk856DDNCtM007_ch19
689	CS_F	clk856DDNCtM007_ch19	21.4	1177.59	1473.95	0.798938	CS_F_clk856DDNCtM007_ch19
690	CS_F	clk856DDNCtM007_ch19	21.6	1247.17	1486.79	0.838834	CS_F_clk856DDNCtM007_ch19
691	CS_F	clk856DDNCtM007_ch19	21.8	1222.7	1499.64	0.815328	CS_F_clk856DDNCtM007_ch19
692	CS_F	clk856DDNCtM007_ch19	22	1163.03	1512.48	0.768955	CS_F_clk856DDNCtM007_ch19
693	CS_F	clk856DDNCtM007_ch19	22.2	1191.85	1525.32	0.781378	CS_F_clk856DDNCtM007_ch19
694	CS_F	clk856DDNCtM007_ch19	22.4	1206.97	1538.15	0.78469	CS_F_clk856DDNCtM007_ch19
695	CS_F	clk856DDNCtM007_ch19	22.6	1259.68	1550.98	0.812183	CS_F_clk856DDNCtM007_ch19
696	CS_F	clk856DDNCtM007_ch19	22.8	1297.7	1563.8	0.829834	CS_F_clk856DDNCtM007_ch19
697	CS_F	clk856DDNCtM007_ch19	23	1364.92	1576.63	0.865725	CS_F_clk856DDNCtM007_ch19
698	CS_F	clk856DDNCtM007_ch19	23.2	1478.13	1589.44	0.929965	CS_F_clk856DDNCtM007_ch19
699	CS_F	clk856DDNCtM007_ch19	23.4	1529.6	1602.26	0.954653	CS_F_clk856DDNCtM007_ch19
700	CS_F	clk856DDNCtM007_ch19	23.6	1574.72	1615.07	0.975019	CS_F_clk856DDNCtM007_ch19
701	CS_F	clk856DDNCtM007_ch19	23.8	1724.33	1627.88	1.05925	CS_F_clk856DDNCtM007_ch19
702	CS_F	clk856DDNCtM007_ch19	24	1729.71	1640.68	1.05426	CS_F_clk856DDNCtM007_ch19
703	CS_F	clk856DDNCtM007_ch19	24.2	1574.26	1653.48	0.95209	CS_F_clk856DDNCtM007_ch19
704	CS_F	clk856DDNCtM007_ch19	24.4	1498.26	1666.28	0.899167	CS_F_clk856DDNCtM007_ch19
705	CS_F	clk856DDNCtM007_ch19	24.6	1449.41	1679.08	0.863222	CS_F_clk856DDNCtM007_ch19
706	CS_F	clk856DDNCtM007_ch19	24.8	1477.25	1691.87	0.87315	CS_F_clk856DDNCtM007_ch19
707	CS_F	clk856DDNCtM007_ch19	25	1604.02	1704.65	0.940964	CS_F_clk856DDNCtM007_ch19
708	CS_F	clk856DDNCtM007_ch19	25.2	1433.46	1717.44	0.834652	CS_F_clk856DDNCtM007_ch19
709	CS_F	clk856DDNCtM007_ch19	25.4	1476.4	1730.22	0.853299	CS_F_clk856DDNCtM007_ch19
710	CS_F	clk856DDNCtM007_ch19	25.6	1460.81	1743	0.838099	CS_F_clk856DDNCtM007_ch19
711	CS_F	clk856DDNCtM007_ch19	25.8	1381	1755.78	0.786549	CS_F_clk856DDNCtM007_ch19
712	CS_F	clk856DDNCtM007_ch19	26	1416.79	1768.55	0.801103	CS_F_clk856DDNCtM007_ch19
713	CS_F	clk856DDNCtM007_ch19	26.2	1425.75	1781.32	0.80039	CS_F_clk856DDNCtM007_ch19
714	CS_F	clk856DDNCtM007_ch19	26.4	1470.68	1794.09	0.819736	CS_F_clk856DDNCtM007_ch19
715	CS_F	clk856DDNCtM007_ch19	26.6	1500.89	1806.85	0.830669	CS_F_clk856DDNCtM007_ch19
716	CS_F	clk856DDNCtM007_ch19	26.8	1366.9	1819.61	0.751206	CS_F_clk856DDNCtM007_ch19
717	CS_F	clk856DDNCtM007_ch19	27	1292.3	1832.37	0.705261	CS_F_clk856DDNCtM007_ch19
718	CS_F	clk856DDNCtM007_ch19	27.2	1352.07	1845.12	0.732781	CS_F_clk856DDNCtM007_ch19
719	CS_F	clk856DDNCtM007_ch19	27.4	1420.38	1857.88	0.764519	CS_F_clk856DDNCtM007_ch19
720	CS_F	clk856DDNCtM007_ch19	27.6	1457.35	1870.63	0.779072	CS_F_clk856DDNCtM007_ch19
721	CS_F	clk856DDNCtM007_ch19	27.8	1497.59	1883.37	0.795166	CS_F_clk856DDNCtM007_ch19
722	CS_F	clk856DDNCtM007_ch19	28	1510.06	1896.12	0.796396	CS_F_clk856DDNCtM007_ch19
723	CS_F	clk856DDNCtM007_ch19	28.2	1543.98	1908.86	0.808847	CS_F_clk856DDNCtM007_ch19
724	CS_F	clk856DDNCtM007_ch19	28.4	1607.42	1921.6	0.836498	CS_F_clk856DDNCtM007_ch19
725	CS_F	clk856DDNCtM007_ch19	28.6	1604.51	1934.34	0.829486	CS_F_clk856DDNCtM007_ch19
726	CS_F	clk856DDNCtM007_ch19	28.8	1603.33	1947.07	0.823457	CS_F_clk856DDNCtM007_ch19
727	CS_F	clk856DDNCtM007_ch19	29	1604.81	1959.8	0.818864	CS_F_clk856DDNCtM007_ch19
728	CS_F	clk856DDNCtM007_ch19	29.2	1700.65	1972.53	0.862167	CS_F_clk856DDNCtM007_ch19
729	CS_F	clk856DDNCtM007_ch19	29.4	1860.71	1985.26	0.937265	CS_F_clk856DDNCtM007_ch19
730	CS_F	clk856DDNCtM007_ch19	29.6	1758.57	1997.98	0.880172	CS_F_clk856DDNCtM007_ch19
731	CS_F	clk856DDNCtM007_ch19	29.8	1726.31	2010.7	0.858557	CS_F_clk856DDNCtM007_ch19
732	CS_F	clk856DDNCtM007_ch19	30	1771.18	2023.42	0.875338	CS_F_clk856DDNCtM007_ch19
733	CS_F	clk856DDNCtM007_ch26	18	1036.48	1254.87	0.825968	CS_F_clk856DDNCtM007_ch26
734	CS_F	clk856DDNCtM007_ch26	18.2	1021.2	1267.79	0.805495	CS_F_clk856DDNCtM007_ch26
735	CS_F	clk856DDNCtM007_ch26	18.4	1042.45	1280.71	0.813961	CS_F_clk856DDNCtM007_ch26
736	CS_F	clk856DDNCtM007_ch26	18.6	1072.71	1293.63	0.829226	CS_F_clk856DDNCtM007_ch26
737	CS_F	clk856DDNCtM007_ch26	18.8	1071.59	1306.54	0.820174	CS_F_clk856DDNCtM007_ch26
738	CS_F	clk856DDNCtM007_ch26	19	1017.55	1319.44	0.771196	CS_F_clk856DDNCtM007_ch26
739	CS_F	clk856DDNCtM007_ch26	19.2	1093.51	1332.34	0.820745	CS_F_clk856DDNCtM007_ch26
740	CS_F	clk856DDNCtM007_ch26	19.4	1160.38	1345.24	0.862581	CS_F_clk856DDNCtM007_ch26
741	CS_F	clk856DDNCtM007_ch26	19.6	1120.24	1358.13	0.82484	CS_F_clk856DDNCtM007_ch26
742	CS_F	clk856DDNCtM007_ch26	19.8	1133.65	1371.01	0.826874	CS_F_clk856DDNCtM007_ch26
743	CS_F	clk856DDNCtM007_ch26	20	1189.97	1383.89	0.859867	CS_F_clk856DDNCtM007_ch26
744	CS_F	clk856DDNCtM007_ch26	20.2	1094.15	1396.77	0.783343	CS_F_clk856DDNCtM007_ch26
745	CS_F	clk856DDNCtM007_ch26	20.4	1152.55	1409.64	0.817618	CS_F_clk856DDNCtM007_ch26
746	CS_F	clk856DDNCtM007_ch26	20.6	1190.36	1422.51	0.836804	CS_F_clk856DDNCtM007_ch26
747	CS_F	clk856DDNCtM007_ch26	20.8	1173.33	1435.38	0.817436	CS_F_clk856DDNCtM007_ch26
748	CS_F	clk856DDNCtM007_ch26	21	1269.93	1448.24	0.876876	CS_F_clk856DDNCtM007_ch26
749	CS_F	clk856DDNCtM007_ch26	21.2	1258.04	1461.09	0.861023	CS_F_clk856DDNCtM007_ch26
750	CS_F	clk856DDNCtM007_ch26	21.4	1245.78	1473.95	0.845198	CS_F_clk856DDNCtM007_ch26
751	CS_F	clk856DDNCtM007_ch26	21.6	1207.95	1486.79	0.81245	CS_F_clk856DDNCtM007_ch26
752	CS_F	clk856DDNCtM007_ch26	21.8	1265.8	1499.64	0.844071	CS_F_clk856DDNCtM007_ch26
753	CS_F	clk856DDNCtM007_ch26	22	1181.71	1512.48	0.781304	CS_F_clk856DDNCtM007_ch26
754	CS_F	clk856DDNCtM007_ch26	22.2	1253	1525.32	0.821471	CS_F_clk856DDNCtM007_ch26
755	CS_F	clk856DDNCtM007_ch26	22.4	1260.59	1538.15	0.81955	CS_F_clk856DDNCtM007_ch26
756	CS_F	clk856DDNCtM007_ch26	22.6	1312.4	1550.98	0.846173	CS_F_clk856DDNCtM007_ch26
757	CS_F	clk856DDNCtM007_ch26	22.8	1334.34	1563.8	0.853263	CS_F_clk856DDNCtM007_ch26
758	CS_F	clk856DDNCtM007_ch26	23	1332.23	1576.63	0.844987	CS_F_clk856DDNCtM007_ch26
759	CS_F	clk856DDNCtM007_ch26	23.2	1398	1589.44	0.879555	CS_F_clk856DDNCtM007_ch26
760	CS_F	clk856DDNCtM007_ch26	23.4	1486.74	1602.26	0.927906	CS_F_clk856DDNCtM007_ch26
761	CS_F	clk856DDNCtM007_ch26	23.6	1647.93	1615.07	1.02035	CS_F_clk856DDNCtM007_ch26
762	CS_F	clk856DDNCtM007_ch26	23.8	1648.64	1627.88	1.01275	CS_F_clk856DDNCtM007_ch26
763	CS_F	clk856DDNCtM007_ch26	24	1639.71	1640.68	0.99941	CS_F_clk856DDNCtM007_ch26
764	CS_F	clk856DDNCtM007_ch26	24.2	1662.86	1653.48	1.00567	CS_F_clk856DDNCtM007_ch26
765	CS_F	clk856DDNCtM007_ch26	24.4	1554.08	1666.28	0.932665	CS_F_clk856DDNCtM007_ch26
766	CS_F	clk856DDNCtM007_ch26	24.6	1640.96	1679.08	0.977297	CS_F_clk856DDNCtM007_ch26
767	CS_F	clk856DDNCtM007_ch26	24.8	1542.58	1691.87	0.911763	CS_F_clk856DDNCtM007_ch26
768	CS_F	clk856DDNCtM007_ch26	25	1598.34	1704.65	0.937635	CS_F_clk856DDNCtM007_ch26
769	CS_F	clk856DDNCtM007_ch26	25.2	1542.7	1717.44	0.898257	CS_F_clk856DDNCtM007_ch26
770	CS_F	clk856DDNCtM007_ch26	25.4	1518.17	1730.22	0.877442	CS_F_clk856DDNCtM007_ch26
771	CS_F	clk856DDNCtM007_ch26	25.6	1617.2	1743	0.927827	CS_F_clk856DDNCtM007_ch26
772	CS_F	clk856DDNCtM007_ch26	25.8	1649.02	1755.78	0.939198	CS_F_clk856DDNCtM007_ch26
773	CS_F	clk856DDNCtM007_ch26	26	1606.02	1768.55	0.908103	CS_F_clk856DDNCtM007_ch26
774	CS_F	clk856DDNCtM007_ch26	26.2	1506.44	1781.32	0.84569	CS_F_clk856DDNCtM007_ch26
775	CS_F	clk856DDNCtM007_ch26	26.4	1574.42	1794.09	0.877564	CS_F_clk856DDNCtM007_ch26
776	CS_F	clk856DDNCtM007_ch26	26.6	1513.58	1806.85	0.837688	CS_F_clk856DDNCtM007_ch26
777	CS_F	clk856DDNCtM007_ch26	26.8	1504.16	1819.61	0.826638	CS_F_clk856DDNCtM007_ch26
778	CS_F	clk856DDNCtM007_ch26	27	1626.93	1832.37	0.887883	CS_F_clk856DDNCtM007_ch26
779	CS_F	clk856DDNCtM007_ch26	27.2	1577.66	1845.12	0.855043	CS_F_clk856DDNCtM007_ch26
780	CS_F	clk856DDNCtM007_ch26	27.4	1528.36	1857.88	0.822637	CS_F_clk856DDNCtM007_ch26
781	CS_F	clk856DDNCtM007_ch26	27.6	1541.35	1870.63	0.823975	CS_F_clk856DDNCtM007_ch26
782	CS_F	clk856DDNCtM007_ch26	27.8	1521.66	1883.37	0.807944	CS_F_clk856DDNCtM007_ch26
783	CS_F	clk856DDNCtM007_ch26	28	1469.56	1896.12	0.775034	CS_F_clk856DDNCtM007_ch26
784	CS_F	clk856DDNCtM007_ch26	28.2	1626.76	1908.86	0.852212	CS_F_clk856DDNCtM007_ch26
785	CS_F	clk856DDNCtM007_ch26	28.4	1613.71	1921.6	0.839775	CS_F_clk856DDNCtM007_ch26
786	CS_F	clk856DDNCtM007_ch26	28.6	1651.66	1934.34	0.853863	CS_F_clk856DDNCtM007_ch26
787	CS_F	clk856DDNCtM007_ch26	28.8	1632.09	1947.07	0.838229	CS_F_clk856DDNCtM007_ch26
788	CS_F	clk856DDNCtM007_ch26	29	1658.39	1959.8	0.846204	CS_F_clk856DDNCtM007_ch26
789	CS_F	clk856DDNCtM007_ch26	29.2	1732.02	1972.53	0.87807	CS_F_clk856DDNCtM007_ch26
790	CS_F	clk856DDNCtM007_ch26	29.4	1723.36	1985.26	0.86808	CS_F_clk856DDNCtM007_ch26
791	CS_F	clk856DDNCtM007_ch26	29.6	1904.59	1997.98	0.953254	CS_F_clk856DDNCtM007_ch26
792	CS_F	clk856DDNCtM007_ch26	29.8	1808.56	2010.7	0.899465	CS_F_clk856DDNCtM007_ch26
793	CS_F	clk856DDNCtM007_ch26	30	1792.72	2023.42	0.885983	CS_F_clk856DDNCtM007_ch26
794	CLK_TRPA1_F	clk856DDNCtM001_ch19	18	1089.45	1254.87	0.868174	CLK_TRPA1_F_clk856DDNCtM001_ch19
795	CLK_TRPA1_F	clk856DDNCtM001_ch19	18.2	1057.77	1267.79	0.834336	CLK_TRPA1_F_clk856DDNCtM001_ch19
796	CLK_TRPA1_F	clk856DDNCtM001_ch19	18.4	1012.49	1280.71	0.790568	CLK_TRPA1_F_clk856DDNCtM001_ch19
797	CLK_TRPA1_F	clk856DDNCtM001_ch19	18.6	1058.98	1293.63	0.818617	CLK_TRPA1_F_clk856DDNCtM001_ch19
798	CLK_TRPA1_F	clk856DDNCtM001_ch19	18.8	1049.92	1306.54	0.803587	CLK_TRPA1_F_clk856DDNCtM001_ch19
799	CLK_TRPA1_F	clk856DDNCtM001_ch19	19	1030.83	1319.44	0.78126	CLK_TRPA1_F_clk856DDNCtM001_ch19
800	CLK_TRPA1_F	clk856DDNCtM001_ch19	19.2	1127.84	1332.34	0.846509	CLK_TRPA1_F_clk856DDNCtM001_ch19
801	CLK_TRPA1_F	clk856DDNCtM001_ch19	19.4	1132.04	1345.24	0.841517	CLK_TRPA1_F_clk856DDNCtM001_ch19
802	CLK_TRPA1_F	clk856DDNCtM001_ch19	19.6	1067.73	1358.13	0.78618	CLK_TRPA1_F_clk856DDNCtM001_ch19
803	CLK_TRPA1_F	clk856DDNCtM001_ch19	19.8	1211.47	1371.01	0.883633	CLK_TRPA1_F_clk856DDNCtM001_ch19
804	CLK_TRPA1_F	clk856DDNCtM001_ch19	20	1149.47	1383.89	0.830603	CLK_TRPA1_F_clk856DDNCtM001_ch19
805	CLK_TRPA1_F	clk856DDNCtM001_ch19	20.2	1100.28	1396.77	0.787728	CLK_TRPA1_F_clk856DDNCtM001_ch19
806	CLK_TRPA1_F	clk856DDNCtM001_ch19	20.4	1222.87	1409.64	0.867505	CLK_TRPA1_F_clk856DDNCtM001_ch19
807	CLK_TRPA1_F	clk856DDNCtM001_ch19	20.6	1204.15	1422.51	0.846493	CLK_TRPA1_F_clk856DDNCtM001_ch19
808	CLK_TRPA1_F	clk856DDNCtM001_ch19	20.8	1158.89	1435.38	0.807376	CLK_TRPA1_F_clk856DDNCtM001_ch19
809	CLK_TRPA1_F	clk856DDNCtM001_ch19	21	1162.05	1448.24	0.802388	CLK_TRPA1_F_clk856DDNCtM001_ch19
810	CLK_TRPA1_F	clk856DDNCtM001_ch19	21.2	1147.31	1461.09	0.785243	CLK_TRPA1_F_clk856DDNCtM001_ch19
811	CLK_TRPA1_F	clk856DDNCtM001_ch19	21.4	1238.08	1473.95	0.839975	CLK_TRPA1_F_clk856DDNCtM001_ch19
812	CLK_TRPA1_F	clk856DDNCtM001_ch19	21.6	1256.61	1486.79	0.845178	CLK_TRPA1_F_clk856DDNCtM001_ch19
813	CLK_TRPA1_F	clk856DDNCtM001_ch19	21.8	1211.9	1499.64	0.808126	CLK_TRPA1_F_clk856DDNCtM001_ch19
814	CLK_TRPA1_F	clk856DDNCtM001_ch19	22	1256.78	1512.48	0.830939	CLK_TRPA1_F_clk856DDNCtM001_ch19
815	CLK_TRPA1_F	clk856DDNCtM001_ch19	22.2	1264.75	1525.32	0.829174	CLK_TRPA1_F_clk856DDNCtM001_ch19
816	CLK_TRPA1_F	clk856DDNCtM001_ch19	22.4	1285.6	1538.15	0.835807	CLK_TRPA1_F_clk856DDNCtM001_ch19
817	CLK_TRPA1_F	clk856DDNCtM001_ch19	22.6	1291.17	1550.98	0.83249	CLK_TRPA1_F_clk856DDNCtM001_ch19
818	CLK_TRPA1_F	clk856DDNCtM001_ch19	22.8	1236.74	1563.8	0.790856	CLK_TRPA1_F_clk856DDNCtM001_ch19
819	CLK_TRPA1_F	clk856DDNCtM001_ch19	23	1186.7	1576.63	0.752686	CLK_TRPA1_F_clk856DDNCtM001_ch19
820	CLK_TRPA1_F	clk856DDNCtM001_ch19	23.2	1304.22	1589.44	0.820551	CLK_TRPA1_F_clk856DDNCtM001_ch19
821	CLK_TRPA1_F	clk856DDNCtM001_ch19	23.4	1441.83	1602.26	0.899874	CLK_TRPA1_F_clk856DDNCtM001_ch19
822	CLK_TRPA1_F	clk856DDNCtM001_ch19	23.6	1422.74	1615.07	0.880916	CLK_TRPA1_F_clk856DDNCtM001_ch19
823	CLK_TRPA1_F	clk856DDNCtM001_ch19	23.8	1441.24	1627.88	0.885348	CLK_TRPA1_F_clk856DDNCtM001_ch19
824	CLK_TRPA1_F	clk856DDNCtM001_ch19	24	1614.51	1640.68	0.984048	CLK_TRPA1_F_clk856DDNCtM001_ch19
825	CLK_TRPA1_F	clk856DDNCtM001_ch19	24.2	1470.11	1653.48	0.8891	CLK_TRPA1_F_clk856DDNCtM001_ch19
826	CLK_TRPA1_F	clk856DDNCtM001_ch19	24.4	1536.29	1666.28	0.921986	CLK_TRPA1_F_clk856DDNCtM001_ch19
827	CLK_TRPA1_F	clk856DDNCtM001_ch19	24.6	1573.31	1679.08	0.93701	CLK_TRPA1_F_clk856DDNCtM001_ch19
828	CLK_TRPA1_F	clk856DDNCtM001_ch19	24.8	1584.4	1691.87	0.93648	CLK_TRPA1_F_clk856DDNCtM001_ch19
829	CLK_TRPA1_F	clk856DDNCtM001_ch19	25	1708.54	1704.65	1.00228	CLK_TRPA1_F_clk856DDNCtM001_ch19
830	CLK_TRPA1_F	clk856DDNCtM001_ch19	25.2	1776.46	1717.44	1.03437	CLK_TRPA1_F_clk856DDNCtM001_ch19
831	CLK_TRPA1_F	clk856DDNCtM001_ch19	25.4	1851.04	1730.22	1.06983	CLK_TRPA1_F_clk856DDNCtM001_ch19
832	CLK_TRPA1_F	clk856DDNCtM001_ch19	25.6	1784.7	1743	1.02392	CLK_TRPA1_F_clk856DDNCtM001_ch19
833	CLK_TRPA1_F	clk856DDNCtM001_ch19	25.8	1773	1755.78	1.00981	CLK_TRPA1_F_clk856DDNCtM001_ch19
834	CLK_TRPA1_F	clk856DDNCtM001_ch19	26	1688.96	1768.55	0.955	CLK_TRPA1_F_clk856DDNCtM001_ch19
835	CLK_TRPA1_F	clk856DDNCtM001_ch19	26.2	1660.79	1781.32	0.932336	CLK_TRPA1_F_clk856DDNCtM001_ch19
836	CLK_TRPA1_F	clk856DDNCtM001_ch19	26.4	1757.33	1794.09	0.979515	CLK_TRPA1_F_clk856DDNCtM001_ch19
837	CLK_TRPA1_F	clk856DDNCtM001_ch19	26.6	1764.98	1806.85	0.97683	CLK_TRPA1_F_clk856DDNCtM001_ch19
838	CLK_TRPA1_F	clk856DDNCtM001_ch19	26.8	1595.5	1819.61	0.876836	CLK_TRPA1_F_clk856DDNCtM001_ch19
839	CLK_TRPA1_F	clk856DDNCtM001_ch19	27	1658.9	1832.37	0.905333	CLK_TRPA1_F_clk856DDNCtM001_ch19
840	CLK_TRPA1_F	clk856DDNCtM001_ch19	27.2	1553.32	1845.12	0.84185	CLK_TRPA1_F_clk856DDNCtM001_ch19
841	CLK_TRPA1_F	clk856DDNCtM001_ch19	27.4	1601.07	1857.88	0.861773	CLK_TRPA1_F_clk856DDNCtM001_ch19
842	CLK_TRPA1_F	clk856DDNCtM001_ch19	27.6	1535.51	1870.63	0.820853	CLK_TRPA1_F_clk856DDNCtM001_ch19
843	CLK_TRPA1_F	clk856DDNCtM001_ch19	27.8	1584.65	1883.37	0.84139	CLK_TRPA1_F_clk856DDNCtM001_ch19
844	CLK_TRPA1_F	clk856DDNCtM001_ch19	28	1588.16	1896.12	0.837584	CLK_TRPA1_F_clk856DDNCtM001_ch19
845	CLK_TRPA1_F	clk856DDNCtM001_ch19	28.2	1546.47	1908.86	0.810152	CLK_TRPA1_F_clk856DDNCtM001_ch19
846	CLK_TRPA1_F	clk856DDNCtM001_ch19	28.4	1555.68	1921.6	0.809576	CLK_TRPA1_F_clk856DDNCtM001_ch19
847	CLK_TRPA1_F	clk856DDNCtM001_ch19	28.6	1605.49	1934.34	0.829994	CLK_TRPA1_F_clk856DDNCtM001_ch19
848	CLK_TRPA1_F	clk856DDNCtM001_ch19	28.8	1626.23	1947.07	0.835216	CLK_TRPA1_F_clk856DDNCtM001_ch19
849	CLK_TRPA1_F	clk856DDNCtM001_ch19	29	1626.86	1959.8	0.830115	CLK_TRPA1_F_clk856DDNCtM001_ch19
850	CLK_TRPA1_F	clk856DDNCtM001_ch19	29.2	1708.7	1972.53	0.866247	CLK_TRPA1_F_clk856DDNCtM001_ch19
851	CLK_TRPA1_F	clk856DDNCtM001_ch19	29.4	1688.92	1985.26	0.850732	CLK_TRPA1_F_clk856DDNCtM001_ch19
852	CLK_TRPA1_F	clk856DDNCtM001_ch19	29.6	1765.77	1997.98	0.883778	CLK_TRPA1_F_clk856DDNCtM001_ch19
853	CLK_TRPA1_F	clk856DDNCtM001_ch19	29.8	1740.61	2010.7	0.86567	CLK_TRPA1_F_clk856DDNCtM001_ch19
854	CLK_TRPA1_F	clk856DDNCtM001_ch19	30	1805.94	2023.42	0.892516	CLK_TRPA1_F_clk856DDNCtM001_ch19
855	CLK_TRPA1_F	clk856DDNCtM001_ch20	18	1016.56	1254.87	0.810095	CLK_TRPA1_F_clk856DDNCtM001_ch20
856	CLK_TRPA1_F	clk856DDNCtM001_ch20	18.2	1083.31	1267.79	0.854484	CLK_TRPA1_F_clk856DDNCtM001_ch20
857	CLK_TRPA1_F	clk856DDNCtM001_ch20	18.4	1067.35	1280.71	0.8334	CLK_TRPA1_F_clk856DDNCtM001_ch20
858	CLK_TRPA1_F	clk856DDNCtM001_ch20	18.6	951.003	1293.63	0.735144	CLK_TRPA1_F_clk856DDNCtM001_ch20
859	CLK_TRPA1_F	clk856DDNCtM001_ch20	18.8	983.679	1306.54	0.75289	CLK_TRPA1_F_clk856DDNCtM001_ch20
860	CLK_TRPA1_F	clk856DDNCtM001_ch20	19	1023.4	1319.44	0.775635	CLK_TRPA1_F_clk856DDNCtM001_ch20
861	CLK_TRPA1_F	clk856DDNCtM001_ch20	19.2	1052.88	1332.34	0.790246	CLK_TRPA1_F_clk856DDNCtM001_ch20
862	CLK_TRPA1_F	clk856DDNCtM001_ch20	19.4	1141.31	1345.24	0.848406	CLK_TRPA1_F_clk856DDNCtM001_ch20
863	CLK_TRPA1_F	clk856DDNCtM001_ch20	19.6	1074.84	1358.13	0.791412	CLK_TRPA1_F_clk856DDNCtM001_ch20
864	CLK_TRPA1_F	clk856DDNCtM001_ch20	19.8	1143.02	1371.01	0.833705	CLK_TRPA1_F_clk856DDNCtM001_ch20
865	CLK_TRPA1_F	clk856DDNCtM001_ch20	20	1090.62	1383.89	0.788082	CLK_TRPA1_F_clk856DDNCtM001_ch20
866	CLK_TRPA1_F	clk856DDNCtM001_ch20	20.2	1091.96	1396.77	0.781772	CLK_TRPA1_F_clk856DDNCtM001_ch20
867	CLK_TRPA1_F	clk856DDNCtM001_ch20	20.4	1041.91	1409.64	0.739132	CLK_TRPA1_F_clk856DDNCtM001_ch20
868	CLK_TRPA1_F	clk856DDNCtM001_ch20	20.6	1245.63	1422.51	0.875657	CLK_TRPA1_F_clk856DDNCtM001_ch20
869	CLK_TRPA1_F	clk856DDNCtM001_ch20	20.8	1210.42	1435.38	0.843274	CLK_TRPA1_F_clk856DDNCtM001_ch20
870	CLK_TRPA1_F	clk856DDNCtM001_ch20	21	1168.76	1448.24	0.807022	CLK_TRPA1_F_clk856DDNCtM001_ch20
871	CLK_TRPA1_F	clk856DDNCtM001_ch20	21.2	1166.07	1461.09	0.798077	CLK_TRPA1_F_clk856DDNCtM001_ch20
872	CLK_TRPA1_F	clk856DDNCtM001_ch20	21.4	1358.45	1473.95	0.921638	CLK_TRPA1_F_clk856DDNCtM001_ch20
873	CLK_TRPA1_F	clk856DDNCtM001_ch20	21.6	1342.5	1486.79	0.902951	CLK_TRPA1_F_clk856DDNCtM001_ch20
874	CLK_TRPA1_F	clk856DDNCtM001_ch20	21.8	1433.34	1499.64	0.955789	CLK_TRPA1_F_clk856DDNCtM001_ch20
875	CLK_TRPA1_F	clk856DDNCtM001_ch20	22	1319.61	1512.48	0.872479	CLK_TRPA1_F_clk856DDNCtM001_ch20
876	CLK_TRPA1_F	clk856DDNCtM001_ch20	22.2	1374.83	1525.32	0.901339	CLK_TRPA1_F_clk856DDNCtM001_ch20
877	CLK_TRPA1_F	clk856DDNCtM001_ch20	22.4	1484.45	1538.15	0.965091	CLK_TRPA1_F_clk856DDNCtM001_ch20
878	CLK_TRPA1_F	clk856DDNCtM001_ch20	22.6	1650.85	1550.98	1.0644	CLK_TRPA1_F_clk856DDNCtM001_ch20
879	CLK_TRPA1_F	clk856DDNCtM001_ch20	22.8	1619.73	1563.8	1.03576	CLK_TRPA1_F_clk856DDNCtM001_ch20
880	CLK_TRPA1_F	clk856DDNCtM001_ch20	23	1698	1576.63	1.07699	CLK_TRPA1_F_clk856DDNCtM001_ch20
881	CLK_TRPA1_F	clk856DDNCtM001_ch20	23.2	1612.71	1589.44	1.01464	CLK_TRPA1_F_clk856DDNCtM001_ch20
882	CLK_TRPA1_F	clk856DDNCtM001_ch20	23.4	1626.56	1602.26	1.01517	CLK_TRPA1_F_clk856DDNCtM001_ch20
883	CLK_TRPA1_F	clk856DDNCtM001_ch20	23.6	1678.92	1615.07	1.03954	CLK_TRPA1_F_clk856DDNCtM001_ch20
884	CLK_TRPA1_F	clk856DDNCtM001_ch20	23.8	1620.82	1627.88	0.995663	CLK_TRPA1_F_clk856DDNCtM001_ch20
885	CLK_TRPA1_F	clk856DDNCtM001_ch20	24	1631.34	1640.68	0.994308	CLK_TRPA1_F_clk856DDNCtM001_ch20
886	CLK_TRPA1_F	clk856DDNCtM001_ch20	24.2	1584.93	1653.48	0.958541	CLK_TRPA1_F_clk856DDNCtM001_ch20
887	CLK_TRPA1_F	clk856DDNCtM001_ch20	24.4	1500.96	1666.28	0.900784	CLK_TRPA1_F_clk856DDNCtM001_ch20
888	CLK_TRPA1_F	clk856DDNCtM001_ch20	24.6	1463.54	1679.08	0.871633	CLK_TRPA1_F_clk856DDNCtM001_ch20
889	CLK_TRPA1_F	clk856DDNCtM001_ch20	24.8	1421.65	1691.87	0.840284	CLK_TRPA1_F_clk856DDNCtM001_ch20
890	CLK_TRPA1_F	clk856DDNCtM001_ch20	25	1395.74	1704.65	0.818785	CLK_TRPA1_F_clk856DDNCtM001_ch20
891	CLK_TRPA1_F	clk856DDNCtM001_ch20	25.2	1433.87	1717.44	0.834889	CLK_TRPA1_F_clk856DDNCtM001_ch20
892	CLK_TRPA1_F	clk856DDNCtM001_ch20	25.4	1491.22	1730.22	0.861864	CLK_TRPA1_F_clk856DDNCtM001_ch20
893	CLK_TRPA1_F	clk856DDNCtM001_ch20	25.6	1474.17	1743	0.845767	CLK_TRPA1_F_clk856DDNCtM001_ch20
894	CLK_TRPA1_F	clk856DDNCtM001_ch20	25.8	1491.3	1755.78	0.849367	CLK_TRPA1_F_clk856DDNCtM001_ch20
895	CLK_TRPA1_F	clk856DDNCtM001_ch20	26	1379.94	1768.55	0.780265	CLK_TRPA1_F_clk856DDNCtM001_ch20
896	CLK_TRPA1_F	clk856DDNCtM001_ch20	26.2	1502.12	1781.32	0.843263	CLK_TRPA1_F_clk856DDNCtM001_ch20
897	CLK_TRPA1_F	clk856DDNCtM001_ch20	26.4	1581.53	1794.09	0.881525	CLK_TRPA1_F_clk856DDNCtM001_ch20
898	CLK_TRPA1_F	clk856DDNCtM001_ch20	26.6	1611.49	1806.85	0.89188	CLK_TRPA1_F_clk856DDNCtM001_ch20
899	CLK_TRPA1_F	clk856DDNCtM001_ch20	26.8	1383.37	1819.61	0.760255	CLK_TRPA1_F_clk856DDNCtM001_ch20
900	CLK_TRPA1_F	clk856DDNCtM001_ch20	27	1410.93	1832.37	0.770001	CLK_TRPA1_F_clk856DDNCtM001_ch20
901	CLK_TRPA1_F	clk856DDNCtM001_ch20	27.2	1412.62	1845.12	0.765593	CLK_TRPA1_F_clk856DDNCtM001_ch20
902	CLK_TRPA1_F	clk856DDNCtM001_ch20	27.4	1417.54	1857.88	0.762988	CLK_TRPA1_F_clk856DDNCtM001_ch20
903	CLK_TRPA1_F	clk856DDNCtM001_ch20	27.6	1508.54	1870.63	0.806434	CLK_TRPA1_F_clk856DDNCtM001_ch20
904	CLK_TRPA1_F	clk856DDNCtM001_ch20	27.8	1482.97	1883.37	0.787399	CLK_TRPA1_F_clk856DDNCtM001_ch20
905	CLK_TRPA1_F	clk856DDNCtM001_ch20	28	1443.81	1896.12	0.761454	CLK_TRPA1_F_clk856DDNCtM001_ch20
906	CLK_TRPA1_F	clk856DDNCtM001_ch20	28.2	1555.91	1908.86	0.8151	CLK_TRPA1_F_clk856DDNCtM001_ch20
907	CLK_TRPA1_F	clk856DDNCtM001_ch20	28.4	1585.61	1921.6	0.825149	CLK_TRPA1_F_clk856DDNCtM001_ch20
908	CLK_TRPA1_F	clk856DDNCtM001_ch20	28.6	1573.21	1934.34	0.813309	CLK_TRPA1_F_clk856DDNCtM001_ch20
909	CLK_TRPA1_F	clk856DDNCtM001_ch20	28.8	1591.42	1947.07	0.817338	CLK_TRPA1_F_clk856DDNCtM001_ch20
910	CLK_TRPA1_F	clk856DDNCtM001_ch20	29	1767.6	1959.8	0.901927	CLK_TRPA1_F_clk856DDNCtM001_ch20
911	CLK_TRPA1_F	clk856DDNCtM001_ch20	29.2	1640.42	1972.53	0.831632	CLK_TRPA1_F_clk856DDNCtM001_ch20
912	CLK_TRPA1_F	clk856DDNCtM001_ch20	29.4	1648.31	1985.26	0.830273	CLK_TRPA1_F_clk856DDNCtM001_ch20
913	CLK_TRPA1_F	clk856DDNCtM001_ch20	29.6	1724.24	1997.98	0.86299	CLK_TRPA1_F_clk856DDNCtM001_ch20
914	CLK_TRPA1_F	clk856DDNCtM001_ch20	29.8	1765.52	2010.7	0.878062	CLK_TRPA1_F_clk856DDNCtM001_ch20
915	CLK_TRPA1_F	clk856DDNCtM001_ch20	30	1724.66	2023.42	0.852348	CLK_TRPA1_F_clk856DDNCtM001_ch20
916	CLK_TRPA1_F	clk856DDNCtM001_ch21	18	1062.49	1254.87	0.846691	CLK_TRPA1_F_clk856DDNCtM001_ch21
917	CLK_TRPA1_F	clk856DDNCtM001_ch21	18.2	1055.64	1267.79	0.832656	CLK_TRPA1_F_clk856DDNCtM001_ch21
918	CLK_TRPA1_F	clk856DDNCtM001_ch21	18.4	1078.99	1280.71	0.842495	CLK_TRPA1_F_clk856DDNCtM001_ch21
919	CLK_TRPA1_F	clk856DDNCtM001_ch21	18.6	1027.79	1293.63	0.794504	CLK_TRPA1_F_clk856DDNCtM001_ch21
920	CLK_TRPA1_F	clk856DDNCtM001_ch21	18.8	978.452	1306.54	0.74889	CLK_TRPA1_F_clk856DDNCtM001_ch21
921	CLK_TRPA1_F	clk856DDNCtM001_ch21	19	1067.39	1319.44	0.808969	CLK_TRPA1_F_clk856DDNCtM001_ch21
922	CLK_TRPA1_F	clk856DDNCtM001_ch21	19.2	1091.73	1332.34	0.819405	CLK_TRPA1_F_clk856DDNCtM001_ch21
923	CLK_TRPA1_F	clk856DDNCtM001_ch21	19.4	1081.67	1345.24	0.804077	CLK_TRPA1_F_clk856DDNCtM001_ch21
924	CLK_TRPA1_F	clk856DDNCtM001_ch21	19.6	1031.45	1358.13	0.759463	CLK_TRPA1_F_clk856DDNCtM001_ch21
925	CLK_TRPA1_F	clk856DDNCtM001_ch21	19.8	1227.03	1371.01	0.894977	CLK_TRPA1_F_clk856DDNCtM001_ch21
926	CLK_TRPA1_F	clk856DDNCtM001_ch21	20	1132.19	1383.89	0.818119	CLK_TRPA1_F_clk856DDNCtM001_ch21
927	CLK_TRPA1_F	clk856DDNCtM001_ch21	20.2	1231.89	1396.77	0.881958	CLK_TRPA1_F_clk856DDNCtM001_ch21
928	CLK_TRPA1_F	clk856DDNCtM001_ch21	20.4	1174.77	1409.64	0.833383	CLK_TRPA1_F_clk856DDNCtM001_ch21
929	CLK_TRPA1_F	clk856DDNCtM001_ch21	20.6	1155.69	1422.51	0.812431	CLK_TRPA1_F_clk856DDNCtM001_ch21
930	CLK_TRPA1_F	clk856DDNCtM001_ch21	20.8	1159.38	1435.38	0.807717	CLK_TRPA1_F_clk856DDNCtM001_ch21
931	CLK_TRPA1_F	clk856DDNCtM001_ch21	21	1187.79	1448.24	0.82016	CLK_TRPA1_F_clk856DDNCtM001_ch21
932	CLK_TRPA1_F	clk856DDNCtM001_ch21	21.2	1177.51	1461.09	0.80591	CLK_TRPA1_F_clk856DDNCtM001_ch21
933	CLK_TRPA1_F	clk856DDNCtM001_ch21	21.4	1138.16	1473.95	0.772187	CLK_TRPA1_F_clk856DDNCtM001_ch21
934	CLK_TRPA1_F	clk856DDNCtM001_ch21	21.6	1248.44	1486.79	0.839683	CLK_TRPA1_F_clk856DDNCtM001_ch21
935	CLK_TRPA1_F	clk856DDNCtM001_ch21	21.8	1242.23	1499.64	0.828352	CLK_TRPA1_F_clk856DDNCtM001_ch21
936	CLK_TRPA1_F	clk856DDNCtM001_ch21	22	1202.99	1512.48	0.795376	CLK_TRPA1_F_clk856DDNCtM001_ch21
937	CLK_TRPA1_F	clk856DDNCtM001_ch21	22.2	1321.96	1525.32	0.86668	CLK_TRPA1_F_clk856DDNCtM001_ch21
938	CLK_TRPA1_F	clk856DDNCtM001_ch21	22.4	1283.21	1538.15	0.834255	CLK_TRPA1_F_clk856DDNCtM001_ch21
939	CLK_TRPA1_F	clk856DDNCtM001_ch21	22.6	1273.91	1550.98	0.821357	CLK_TRPA1_F_clk856DDNCtM001_ch21
940	CLK_TRPA1_F	clk856DDNCtM001_ch21	22.8	1385.67	1563.8	0.886088	CLK_TRPA1_F_clk856DDNCtM001_ch21
941	CLK_TRPA1_F	clk856DDNCtM001_ch21	23	1318.6	1576.63	0.836341	CLK_TRPA1_F_clk856DDNCtM001_ch21
942	CLK_TRPA1_F	clk856DDNCtM001_ch21	23.2	1411.2	1589.44	0.887859	CLK_TRPA1_F_clk856DDNCtM001_ch21
943	CLK_TRPA1_F	clk856DDNCtM001_ch21	23.4	1323.53	1602.26	0.826041	CLK_TRPA1_F_clk856DDNCtM001_ch21
944	CLK_TRPA1_F	clk856DDNCtM001_ch21	23.6	1436.48	1615.07	0.889421	CLK_TRPA1_F_clk856DDNCtM001_ch21
945	CLK_TRPA1_F	clk856DDNCtM001_ch21	23.8	1381.92	1627.88	0.848907	CLK_TRPA1_F_clk856DDNCtM001_ch21
946	CLK_TRPA1_F	clk856DDNCtM001_ch21	24	1377.86	1640.68	0.839812	CLK_TRPA1_F_clk856DDNCtM001_ch21
947	CLK_TRPA1_F	clk856DDNCtM001_ch21	24.2	1293.35	1653.48	0.782198	CLK_TRPA1_F_clk856DDNCtM001_ch21
948	CLK_TRPA1_F	clk856DDNCtM001_ch21	24.4	1395.25	1666.28	0.837344	CLK_TRPA1_F_clk856DDNCtM001_ch21
949	CLK_TRPA1_F	clk856DDNCtM001_ch21	24.6	1460.62	1679.08	0.869895	CLK_TRPA1_F_clk856DDNCtM001_ch21
950	CLK_TRPA1_F	clk856DDNCtM001_ch21	24.8	1514.47	1691.87	0.895148	CLK_TRPA1_F_clk856DDNCtM001_ch21
951	CLK_TRPA1_F	clk856DDNCtM001_ch21	25	1585.26	1704.65	0.929958	CLK_TRPA1_F_clk856DDNCtM001_ch21
952	CLK_TRPA1_F	clk856DDNCtM001_ch21	25.2	1772.19	1717.44	1.03188	CLK_TRPA1_F_clk856DDNCtM001_ch21
953	CLK_TRPA1_F	clk856DDNCtM001_ch21	25.4	1703.51	1730.22	0.98456	CLK_TRPA1_F_clk856DDNCtM001_ch21
954	CLK_TRPA1_F	clk856DDNCtM001_ch21	25.6	1954.63	1743	1.12142	CLK_TRPA1_F_clk856DDNCtM001_ch21
955	CLK_TRPA1_F	clk856DDNCtM001_ch21	25.8	1717.35	1755.78	0.978116	CLK_TRPA1_F_clk856DDNCtM001_ch21
956	CLK_TRPA1_F	clk856DDNCtM001_ch21	26	1793.96	1768.55	1.01437	CLK_TRPA1_F_clk856DDNCtM001_ch21
957	CLK_TRPA1_F	clk856DDNCtM001_ch21	26.2	1744.76	1781.32	0.979477	CLK_TRPA1_F_clk856DDNCtM001_ch21
958	CLK_TRPA1_F	clk856DDNCtM001_ch21	26.4	1914.59	1794.09	1.06717	CLK_TRPA1_F_clk856DDNCtM001_ch21
959	CLK_TRPA1_F	clk856DDNCtM001_ch21	26.6	1845.69	1806.85	1.0215	CLK_TRPA1_F_clk856DDNCtM001_ch21
960	CLK_TRPA1_F	clk856DDNCtM001_ch21	26.8	1605.37	1819.61	0.882259	CLK_TRPA1_F_clk856DDNCtM001_ch21
961	CLK_TRPA1_F	clk856DDNCtM001_ch21	27	1713.23	1832.37	0.934981	CLK_TRPA1_F_clk856DDNCtM001_ch21
962	CLK_TRPA1_F	clk856DDNCtM001_ch21	27.2	1667.6	1845.12	0.903786	CLK_TRPA1_F_clk856DDNCtM001_ch21
963	CLK_TRPA1_F	clk856DDNCtM001_ch21	27.4	1529.77	1857.88	0.823395	CLK_TRPA1_F_clk856DDNCtM001_ch21
964	CLK_TRPA1_F	clk856DDNCtM001_ch21	27.6	1531.45	1870.63	0.818682	CLK_TRPA1_F_clk856DDNCtM001_ch21
965	CLK_TRPA1_F	clk856DDNCtM001_ch21	27.8	1669.55	1883.37	0.886469	CLK_TRPA1_F_clk856DDNCtM001_ch21
966	CLK_TRPA1_F	clk856DDNCtM001_ch21	28	1616.24	1896.12	0.852392	CLK_TRPA1_F_clk856DDNCtM001_ch21
967	CLK_TRPA1_F	clk856DDNCtM001_ch21	28.2	1631.77	1908.86	0.85484	CLK_TRPA1_F_clk856DDNCtM001_ch21
968	CLK_TRPA1_F	clk856DDNCtM001_ch21	28.4	1690.95	1921.6	0.879969	CLK_TRPA1_F_clk856DDNCtM001_ch21
969	CLK_TRPA1_F	clk856DDNCtM001_ch21	28.6	1743.12	1934.34	0.901144	CLK_TRPA1_F_clk856DDNCtM001_ch21
970	CLK_TRPA1_F	clk856DDNCtM001_ch21	28.8	1757.41	1947.07	0.902592	CLK_TRPA1_F_clk856DDNCtM001_ch21
971	CLK_TRPA1_F	clk856DDNCtM001_ch21	29	1667.73	1959.8	0.85097	CLK_TRPA1_F_clk856DDNCtM001_ch21
972	CLK_TRPA1_F	clk856DDNCtM001_ch21	29.2	1780.72	1972.53	0.902756	CLK_TRPA1_F_clk856DDNCtM001_ch21
973	CLK_TRPA1_F	clk856DDNCtM001_ch21	29.4	1686.59	1985.26	0.849557	CLK_TRPA1_F_clk856DDNCtM001_ch21
974	CLK_TRPA1_F	clk856DDNCtM001_ch21	29.6	1825.11	1997.98	0.913476	CLK_TRPA1_F_clk856DDNCtM001_ch21
975	CLK_TRPA1_F	clk856DDNCtM001_ch21	29.8	1804.1	2010.7	0.89725	CLK_TRPA1_F_clk856DDNCtM001_ch21
976	CLK_TRPA1_F	clk856DDNCtM001_ch21	30	1747.59	2023.42	0.863677	CLK_TRPA1_F_clk856DDNCtM001_ch21
977	CLK_TRPA1_F	clk856DDNCtM001_ch22	18	999.293	1254.87	0.796332	CLK_TRPA1_F_clk856DDNCtM001_ch22
978	CLK_TRPA1_F	clk856DDNCtM001_ch22	18.2	984.908	1267.79	0.776868	CLK_TRPA1_F_clk856DDNCtM001_ch22
979	CLK_TRPA1_F	clk856DDNCtM001_ch22	18.4	966.251	1280.71	0.754463	CLK_TRPA1_F_clk856DDNCtM001_ch22
980	CLK_TRPA1_F	clk856DDNCtM001_ch22	18.6	923.838	1293.63	0.714145	CLK_TRPA1_F_clk856DDNCtM001_ch22
981	CLK_TRPA1_F	clk856DDNCtM001_ch22	18.8	949.287	1306.54	0.726568	CLK_TRPA1_F_clk856DDNCtM001_ch22
982	CLK_TRPA1_F	clk856DDNCtM001_ch22	19	974.754	1319.44	0.738763	CLK_TRPA1_F_clk856DDNCtM001_ch22
983	CLK_TRPA1_F	clk856DDNCtM001_ch22	19.2	922.078	1332.34	0.692073	CLK_TRPA1_F_clk856DDNCtM001_ch22
984	CLK_TRPA1_F	clk856DDNCtM001_ch22	19.4	1055.66	1345.24	0.784737	CLK_TRPA1_F_clk856DDNCtM001_ch22
985	CLK_TRPA1_F	clk856DDNCtM001_ch22	19.6	1128.43	1358.13	0.830873	CLK_TRPA1_F_clk856DDNCtM001_ch22
986	CLK_TRPA1_F	clk856DDNCtM001_ch22	19.8	982.041	1371.01	0.716289	CLK_TRPA1_F_clk856DDNCtM001_ch22
987	CLK_TRPA1_F	clk856DDNCtM001_ch22	20	1089.04	1383.89	0.786939	CLK_TRPA1_F_clk856DDNCtM001_ch22
988	CLK_TRPA1_F	clk856DDNCtM001_ch22	20.2	998.485	1396.77	0.714852	CLK_TRPA1_F_clk856DDNCtM001_ch22
989	CLK_TRPA1_F	clk856DDNCtM001_ch22	20.4	1054.29	1409.64	0.747911	CLK_TRPA1_F_clk856DDNCtM001_ch22
990	CLK_TRPA1_F	clk856DDNCtM001_ch22	20.6	1037.67	1422.51	0.729459	CLK_TRPA1_F_clk856DDNCtM001_ch22
991	CLK_TRPA1_F	clk856DDNCtM001_ch22	20.8	1096.27	1435.38	0.763753	CLK_TRPA1_F_clk856DDNCtM001_ch22
992	CLK_TRPA1_F	clk856DDNCtM001_ch22	21	1246.37	1448.24	0.860611	CLK_TRPA1_F_clk856DDNCtM001_ch22
993	CLK_TRPA1_F	clk856DDNCtM001_ch22	21.2	1167	1461.09	0.798716	CLK_TRPA1_F_clk856DDNCtM001_ch22
994	CLK_TRPA1_F	clk856DDNCtM001_ch22	21.4	1116.37	1473.95	0.757399	CLK_TRPA1_F_clk856DDNCtM001_ch22
995	CLK_TRPA1_F	clk856DDNCtM001_ch22	21.6	1116.43	1486.79	0.750895	CLK_TRPA1_F_clk856DDNCtM001_ch22
996	CLK_TRPA1_F	clk856DDNCtM001_ch22	21.8	1151.41	1499.64	0.767791	CLK_TRPA1_F_clk856DDNCtM001_ch22
997	CLK_TRPA1_F	clk856DDNCtM001_ch22	22	1017.6	1512.48	0.672802	CLK_TRPA1_F_clk856DDNCtM001_ch22
998	CLK_TRPA1_F	clk856DDNCtM001_ch22	22.2	1175.43	1525.32	0.770615	CLK_TRPA1_F_clk856DDNCtM001_ch22
999	CLK_TRPA1_F	clk856DDNCtM001_ch22	22.4	1137.53	1538.15	0.739543	CLK_TRPA1_F_clk856DDNCtM001_ch22
1000	CLK_TRPA1_F	clk856DDNCtM001_ch22	22.6	1137.82	1550.98	0.733612	CLK_TRPA1_F_clk856DDNCtM001_ch22
1001	CLK_TRPA1_F	clk856DDNCtM001_ch22	22.8	1141.73	1563.8	0.730097	CLK_TRPA1_F_clk856DDNCtM001_ch22
1002	CLK_TRPA1_F	clk856DDNCtM001_ch22	23	1132.31	1576.63	0.718185	CLK_TRPA1_F_clk856DDNCtM001_ch22
1003	CLK_TRPA1_F	clk856DDNCtM001_ch22	23.2	1186.07	1589.44	0.74622	CLK_TRPA1_F_clk856DDNCtM001_ch22
1004	CLK_TRPA1_F	clk856DDNCtM001_ch22	23.4	1280.01	1602.26	0.798876	CLK_TRPA1_F_clk856DDNCtM001_ch22
1005	CLK_TRPA1_F	clk856DDNCtM001_ch22	23.6	1314.21	1615.07	0.813717	CLK_TRPA1_F_clk856DDNCtM001_ch22
1006	CLK_TRPA1_F	clk856DDNCtM001_ch22	23.8	1410.25	1627.88	0.866311	CLK_TRPA1_F_clk856DDNCtM001_ch22
1007	CLK_TRPA1_F	clk856DDNCtM001_ch22	24	1550.93	1640.68	0.945296	CLK_TRPA1_F_clk856DDNCtM001_ch22
1008	CLK_TRPA1_F	clk856DDNCtM001_ch22	24.2	1618.47	1653.48	0.978826	CLK_TRPA1_F_clk856DDNCtM001_ch22
1009	CLK_TRPA1_F	clk856DDNCtM001_ch22	24.4	1783.44	1666.28	1.07031	CLK_TRPA1_F_clk856DDNCtM001_ch22
1010	CLK_TRPA1_F	clk856DDNCtM001_ch22	24.6	1986.86	1679.08	1.18331	CLK_TRPA1_F_clk856DDNCtM001_ch22
1011	CLK_TRPA1_F	clk856DDNCtM001_ch22	24.8	2286.04	1691.87	1.3512	CLK_TRPA1_F_clk856DDNCtM001_ch22
1012	CLK_TRPA1_F	clk856DDNCtM001_ch22	25	2569.46	1704.65	1.50732	CLK_TRPA1_F_clk856DDNCtM001_ch22
1013	CLK_TRPA1_F	clk856DDNCtM001_ch22	25.2	2718.41	1717.44	1.58282	CLK_TRPA1_F_clk856DDNCtM001_ch22
1014	CLK_TRPA1_F	clk856DDNCtM001_ch22	25.4	2838.28	1730.22	1.64041	CLK_TRPA1_F_clk856DDNCtM001_ch22
1015	CLK_TRPA1_F	clk856DDNCtM001_ch22	25.6	3101.03	1743	1.77914	CLK_TRPA1_F_clk856DDNCtM001_ch22
1016	CLK_TRPA1_F	clk856DDNCtM001_ch22	25.8	2944.31	1755.78	1.67693	CLK_TRPA1_F_clk856DDNCtM001_ch22
1017	CLK_TRPA1_F	clk856DDNCtM001_ch22	26	2911.08	1768.55	1.64603	CLK_TRPA1_F_clk856DDNCtM001_ch22
1018	CLK_TRPA1_F	clk856DDNCtM001_ch22	26.2	2815.82	1781.32	1.58075	CLK_TRPA1_F_clk856DDNCtM001_ch22
1019	CLK_TRPA1_F	clk856DDNCtM001_ch22	26.4	2605.61	1794.09	1.45233	CLK_TRPA1_F_clk856DDNCtM001_ch22
1020	CLK_TRPA1_F	clk856DDNCtM001_ch22	26.6	2446.4	1806.85	1.35396	CLK_TRPA1_F_clk856DDNCtM001_ch22
1021	CLK_TRPA1_F	clk856DDNCtM001_ch22	26.8	1982.8	1819.61	1.08968	CLK_TRPA1_F_clk856DDNCtM001_ch22
1022	CLK_TRPA1_F	clk856DDNCtM001_ch22	27	1841.8	1832.37	1.00515	CLK_TRPA1_F_clk856DDNCtM001_ch22
1023	CLK_TRPA1_F	clk856DDNCtM001_ch22	27.2	1784.34	1845.12	0.967055	CLK_TRPA1_F_clk856DDNCtM001_ch22
1024	CLK_TRPA1_F	clk856DDNCtM001_ch22	27.4	1598.9	1857.88	0.860605	CLK_TRPA1_F_clk856DDNCtM001_ch22
1025	CLK_TRPA1_F	clk856DDNCtM001_ch22	27.6	1493.44	1870.63	0.798365	CLK_TRPA1_F_clk856DDNCtM001_ch22
1026	CLK_TRPA1_F	clk856DDNCtM001_ch22	27.8	1607.72	1883.37	0.853639	CLK_TRPA1_F_clk856DDNCtM001_ch22
1027	CLK_TRPA1_F	clk856DDNCtM001_ch22	28	1608.33	1896.12	0.848222	CLK_TRPA1_F_clk856DDNCtM001_ch22
1028	CLK_TRPA1_F	clk856DDNCtM001_ch22	28.2	1483.01	1908.86	0.776908	CLK_TRPA1_F_clk856DDNCtM001_ch22
1029	CLK_TRPA1_F	clk856DDNCtM001_ch22	28.4	1366.7	1921.6	0.711232	CLK_TRPA1_F_clk856DDNCtM001_ch22
1030	CLK_TRPA1_F	clk856DDNCtM001_ch22	28.6	1408.74	1934.34	0.728279	CLK_TRPA1_F_clk856DDNCtM001_ch22
1031	CLK_TRPA1_F	clk856DDNCtM001_ch22	28.8	1459.52	1947.07	0.749598	CLK_TRPA1_F_clk856DDNCtM001_ch22
1032	CLK_TRPA1_F	clk856DDNCtM001_ch22	29	1480.64	1959.8	0.755507	CLK_TRPA1_F_clk856DDNCtM001_ch22
1033	CLK_TRPA1_F	clk856DDNCtM001_ch22	29.2	1544.36	1972.53	0.782931	CLK_TRPA1_F_clk856DDNCtM001_ch22
1034	CLK_TRPA1_F	clk856DDNCtM001_ch22	29.4	1718.03	1985.26	0.865392	CLK_TRPA1_F_clk856DDNCtM001_ch22
1035	CLK_TRPA1_F	clk856DDNCtM001_ch22	29.6	1654.7	1997.98	0.828185	CLK_TRPA1_F_clk856DDNCtM001_ch22
1036	CLK_TRPA1_F	clk856DDNCtM001_ch22	29.8	1642.01	2010.7	0.816633	CLK_TRPA1_F_clk856DDNCtM001_ch22
1037	CLK_TRPA1_F	clk856DDNCtM001_ch22	30	1798.93	2023.42	0.889054	CLK_TRPA1_F_clk856DDNCtM001_ch22
1038	CLK_TRPA1_F	clk856DDNCtM001_ch23	18	917.778	1254.87	0.731373	CLK_TRPA1_F_clk856DDNCtM001_ch23
1039	CLK_TRPA1_F	clk856DDNCtM001_ch23	18.2	980.98	1267.79	0.773769	CLK_TRPA1_F_clk856DDNCtM001_ch23
1040	CLK_TRPA1_F	clk856DDNCtM001_ch23	18.4	996.694	1280.71	0.778233	CLK_TRPA1_F_clk856DDNCtM001_ch23
1041	CLK_TRPA1_F	clk856DDNCtM001_ch23	18.6	989.202	1293.63	0.764673	CLK_TRPA1_F_clk856DDNCtM001_ch23
1042	CLK_TRPA1_F	clk856DDNCtM001_ch23	18.8	893.311	1306.54	0.683724	CLK_TRPA1_F_clk856DDNCtM001_ch23
1043	CLK_TRPA1_F	clk856DDNCtM001_ch23	19	1035.63	1319.44	0.784899	CLK_TRPA1_F_clk856DDNCtM001_ch23
1044	CLK_TRPA1_F	clk856DDNCtM001_ch23	19.2	942.016	1332.34	0.707038	CLK_TRPA1_F_clk856DDNCtM001_ch23
1045	CLK_TRPA1_F	clk856DDNCtM001_ch23	19.4	1006.52	1345.24	0.748211	CLK_TRPA1_F_clk856DDNCtM001_ch23
1046	CLK_TRPA1_F	clk856DDNCtM001_ch23	19.6	1120.39	1358.13	0.824952	CLK_TRPA1_F_clk856DDNCtM001_ch23
1047	CLK_TRPA1_F	clk856DDNCtM001_ch23	19.8	1104.16	1371.01	0.805364	CLK_TRPA1_F_clk856DDNCtM001_ch23
1048	CLK_TRPA1_F	clk856DDNCtM001_ch23	20	1153.67	1383.89	0.833642	CLK_TRPA1_F_clk856DDNCtM001_ch23
1049	CLK_TRPA1_F	clk856DDNCtM001_ch23	20.2	986.459	1396.77	0.706242	CLK_TRPA1_F_clk856DDNCtM001_ch23
1050	CLK_TRPA1_F	clk856DDNCtM001_ch23	20.4	1167.86	1409.64	0.828481	CLK_TRPA1_F_clk856DDNCtM001_ch23
1051	CLK_TRPA1_F	clk856DDNCtM001_ch23	20.6	1131.15	1422.51	0.795177	CLK_TRPA1_F_clk856DDNCtM001_ch23
1052	CLK_TRPA1_F	clk856DDNCtM001_ch23	20.8	1175.34	1435.38	0.818836	CLK_TRPA1_F_clk856DDNCtM001_ch23
1053	CLK_TRPA1_F	clk856DDNCtM001_ch23	21	1080.92	1448.24	0.746372	CLK_TRPA1_F_clk856DDNCtM001_ch23
1054	CLK_TRPA1_F	clk856DDNCtM001_ch23	21.2	1084.3	1461.09	0.742114	CLK_TRPA1_F_clk856DDNCtM001_ch23
1055	CLK_TRPA1_F	clk856DDNCtM001_ch23	21.4	1087.15	1473.95	0.737576	CLK_TRPA1_F_clk856DDNCtM001_ch23
1056	CLK_TRPA1_F	clk856DDNCtM001_ch23	21.6	1187.2	1486.79	0.798493	CLK_TRPA1_F_clk856DDNCtM001_ch23
1057	CLK_TRPA1_F	clk856DDNCtM001_ch23	21.8	1224.35	1499.64	0.816428	CLK_TRPA1_F_clk856DDNCtM001_ch23
1058	CLK_TRPA1_F	clk856DDNCtM001_ch23	22	1189.22	1512.48	0.786272	CLK_TRPA1_F_clk856DDNCtM001_ch23
1059	CLK_TRPA1_F	clk856DDNCtM001_ch23	22.2	1448.85	1525.32	0.949867	CLK_TRPA1_F_clk856DDNCtM001_ch23
1060	CLK_TRPA1_F	clk856DDNCtM001_ch23	22.4	1601.22	1538.15	1.041	CLK_TRPA1_F_clk856DDNCtM001_ch23
1061	CLK_TRPA1_F	clk856DDNCtM001_ch23	22.6	1692.77	1550.98	1.09142	CLK_TRPA1_F_clk856DDNCtM001_ch23
1062	CLK_TRPA1_F	clk856DDNCtM001_ch23	22.8	1998.82	1563.8	1.27818	CLK_TRPA1_F_clk856DDNCtM001_ch23
1063	CLK_TRPA1_F	clk856DDNCtM001_ch23	23	2184.05	1576.63	1.38527	CLK_TRPA1_F_clk856DDNCtM001_ch23
1064	CLK_TRPA1_F	clk856DDNCtM001_ch23	23.2	2324.86	1589.44	1.46269	CLK_TRPA1_F_clk856DDNCtM001_ch23
1065	CLK_TRPA1_F	clk856DDNCtM001_ch23	23.4	2398.28	1602.26	1.49681	CLK_TRPA1_F_clk856DDNCtM001_ch23
1066	CLK_TRPA1_F	clk856DDNCtM001_ch23	23.6	2336.4	1615.07	1.44663	CLK_TRPA1_F_clk856DDNCtM001_ch23
1067	CLK_TRPA1_F	clk856DDNCtM001_ch23	23.8	2393.26	1627.88	1.47017	CLK_TRPA1_F_clk856DDNCtM001_ch23
1068	CLK_TRPA1_F	clk856DDNCtM001_ch23	24	2204.73	1640.68	1.34379	CLK_TRPA1_F_clk856DDNCtM001_ch23
1069	CLK_TRPA1_F	clk856DDNCtM001_ch23	24.2	1815.44	1653.48	1.09795	CLK_TRPA1_F_clk856DDNCtM001_ch23
1070	CLK_TRPA1_F	clk856DDNCtM001_ch23	24.4	1832.02	1666.28	1.09947	CLK_TRPA1_F_clk856DDNCtM001_ch23
1071	CLK_TRPA1_F	clk856DDNCtM001_ch23	24.6	1850.2	1679.08	1.10192	CLK_TRPA1_F_clk856DDNCtM001_ch23
1072	CLK_TRPA1_F	clk856DDNCtM001_ch23	24.8	1725.24	1691.87	1.01973	CLK_TRPA1_F_clk856DDNCtM001_ch23
1073	CLK_TRPA1_F	clk856DDNCtM001_ch23	25	1550.3	1704.65	0.90945	CLK_TRPA1_F_clk856DDNCtM001_ch23
1074	CLK_TRPA1_F	clk856DDNCtM001_ch23	25.2	1510.52	1717.44	0.879518	CLK_TRPA1_F_clk856DDNCtM001_ch23
1075	CLK_TRPA1_F	clk856DDNCtM001_ch23	25.4	1450.17	1730.22	0.83814	CLK_TRPA1_F_clk856DDNCtM001_ch23
1076	CLK_TRPA1_F	clk856DDNCtM001_ch23	25.6	1326.28	1743	0.760919	CLK_TRPA1_F_clk856DDNCtM001_ch23
1077	CLK_TRPA1_F	clk856DDNCtM001_ch23	25.8	1407.1	1755.78	0.801413	CLK_TRPA1_F_clk856DDNCtM001_ch23
1078	CLK_TRPA1_F	clk856DDNCtM001_ch23	26	1441.46	1768.55	0.815052	CLK_TRPA1_F_clk856DDNCtM001_ch23
1079	CLK_TRPA1_F	clk856DDNCtM001_ch23	26.2	1388.92	1781.32	0.779715	CLK_TRPA1_F_clk856DDNCtM001_ch23
1080	CLK_TRPA1_F	clk856DDNCtM001_ch23	26.4	1495.96	1794.09	0.83383	CLK_TRPA1_F_clk856DDNCtM001_ch23
1081	CLK_TRPA1_F	clk856DDNCtM001_ch23	26.6	1432.09	1806.85	0.792587	CLK_TRPA1_F_clk856DDNCtM001_ch23
1082	CLK_TRPA1_F	clk856DDNCtM001_ch23	26.8	1253.16	1819.61	0.688696	CLK_TRPA1_F_clk856DDNCtM001_ch23
1083	CLK_TRPA1_F	clk856DDNCtM001_ch23	27	1286.71	1832.37	0.702209	CLK_TRPA1_F_clk856DDNCtM001_ch23
1084	CLK_TRPA1_F	clk856DDNCtM001_ch23	27.2	1293.42	1845.12	0.700994	CLK_TRPA1_F_clk856DDNCtM001_ch23
1085	CLK_TRPA1_F	clk856DDNCtM001_ch23	27.4	1368.04	1857.88	0.736348	CLK_TRPA1_F_clk856DDNCtM001_ch23
1086	CLK_TRPA1_F	clk856DDNCtM001_ch23	27.6	1361.92	1870.63	0.728056	CLK_TRPA1_F_clk856DDNCtM001_ch23
1087	CLK_TRPA1_F	clk856DDNCtM001_ch23	27.8	1382.34	1883.37	0.733972	CLK_TRPA1_F_clk856DDNCtM001_ch23
1088	CLK_TRPA1_F	clk856DDNCtM001_ch23	28	1427.42	1896.12	0.752813	CLK_TRPA1_F_clk856DDNCtM001_ch23
1089	CLK_TRPA1_F	clk856DDNCtM001_ch23	28.2	1390.87	1908.86	0.728641	CLK_TRPA1_F_clk856DDNCtM001_ch23
1090	CLK_TRPA1_F	clk856DDNCtM001_ch23	28.4	1486.6	1921.6	0.773625	CLK_TRPA1_F_clk856DDNCtM001_ch23
1091	CLK_TRPA1_F	clk856DDNCtM001_ch23	28.6	1528.29	1934.34	0.790084	CLK_TRPA1_F_clk856DDNCtM001_ch23
1092	CLK_TRPA1_F	clk856DDNCtM001_ch23	28.8	1500.02	1947.07	0.7704	CLK_TRPA1_F_clk856DDNCtM001_ch23
1093	CLK_TRPA1_F	clk856DDNCtM001_ch23	29	1568.38	1959.8	0.800273	CLK_TRPA1_F_clk856DDNCtM001_ch23
1094	CLK_TRPA1_F	clk856DDNCtM001_ch23	29.2	1533.77	1972.53	0.777565	CLK_TRPA1_F_clk856DDNCtM001_ch23
1095	CLK_TRPA1_F	clk856DDNCtM001_ch23	29.4	1612.1	1985.26	0.812033	CLK_TRPA1_F_clk856DDNCtM001_ch23
1096	CLK_TRPA1_F	clk856DDNCtM001_ch23	29.6	1600.57	1997.98	0.801091	CLK_TRPA1_F_clk856DDNCtM001_ch23
1097	CLK_TRPA1_F	clk856DDNCtM001_ch23	29.8	1627.82	2010.7	0.809576	CLK_TRPA1_F_clk856DDNCtM001_ch23
1098	CLK_TRPA1_F	clk856DDNCtM001_ch23	30	1678.69	2023.42	0.829627	CLK_TRPA1_F_clk856DDNCtM001_ch23
1099	CLK_TRPA1_F	clk856DDNCtM001_ch27	18	1047.84	1254.87	0.835018	CLK_TRPA1_F_clk856DDNCtM001_ch27
1100	CLK_TRPA1_F	clk856DDNCtM001_ch27	18.2	1108.21	1267.79	0.874125	CLK_TRPA1_F_clk856DDNCtM001_ch27
1101	CLK_TRPA1_F	clk856DDNCtM001_ch27	18.4	1029.45	1280.71	0.80381	CLK_TRPA1_F_clk856DDNCtM001_ch27
1102	CLK_TRPA1_F	clk856DDNCtM001_ch27	18.6	1018.99	1293.63	0.787699	CLK_TRPA1_F_clk856DDNCtM001_ch27
1103	CLK_TRPA1_F	clk856DDNCtM001_ch27	18.8	996.086	1306.54	0.762386	CLK_TRPA1_F_clk856DDNCtM001_ch27
1104	CLK_TRPA1_F	clk856DDNCtM001_ch27	19	985.063	1319.44	0.746576	CLK_TRPA1_F_clk856DDNCtM001_ch27
1105	CLK_TRPA1_F	clk856DDNCtM001_ch27	19.2	1063.7	1332.34	0.798367	CLK_TRPA1_F_clk856DDNCtM001_ch27
1106	CLK_TRPA1_F	clk856DDNCtM001_ch27	19.4	1087.17	1345.24	0.808165	CLK_TRPA1_F_clk856DDNCtM001_ch27
1107	CLK_TRPA1_F	clk856DDNCtM001_ch27	19.6	1082.44	1358.13	0.79701	CLK_TRPA1_F_clk856DDNCtM001_ch27
1108	CLK_TRPA1_F	clk856DDNCtM001_ch27	19.8	1096.02	1371.01	0.799422	CLK_TRPA1_F_clk856DDNCtM001_ch27
1109	CLK_TRPA1_F	clk856DDNCtM001_ch27	20	1177.26	1383.89	0.850689	CLK_TRPA1_F_clk856DDNCtM001_ch27
1110	CLK_TRPA1_F	clk856DDNCtM001_ch27	20.2	1089.4	1396.77	0.779938	CLK_TRPA1_F_clk856DDNCtM001_ch27
1111	CLK_TRPA1_F	clk856DDNCtM001_ch27	20.4	1171.63	1409.64	0.831156	CLK_TRPA1_F_clk856DDNCtM001_ch27
1112	CLK_TRPA1_F	clk856DDNCtM001_ch27	20.6	1186.73	1422.51	0.834251	CLK_TRPA1_F_clk856DDNCtM001_ch27
1113	CLK_TRPA1_F	clk856DDNCtM001_ch27	20.8	1153.94	1435.38	0.803926	CLK_TRPA1_F_clk856DDNCtM001_ch27
1114	CLK_TRPA1_F	clk856DDNCtM001_ch27	21	1196.57	1448.24	0.826224	CLK_TRPA1_F_clk856DDNCtM001_ch27
1115	CLK_TRPA1_F	clk856DDNCtM001_ch27	21.2	1119.4	1461.09	0.766136	CLK_TRPA1_F_clk856DDNCtM001_ch27
1116	CLK_TRPA1_F	clk856DDNCtM001_ch27	21.4	1221.38	1473.95	0.828647	CLK_TRPA1_F_clk856DDNCtM001_ch27
1117	CLK_TRPA1_F	clk856DDNCtM001_ch27	21.6	1290.89	1486.79	0.868234	CLK_TRPA1_F_clk856DDNCtM001_ch27
1118	CLK_TRPA1_F	clk856DDNCtM001_ch27	21.8	1315.59	1499.64	0.877269	CLK_TRPA1_F_clk856DDNCtM001_ch27
1119	CLK_TRPA1_F	clk856DDNCtM001_ch27	22	1312.18	1512.48	0.867567	CLK_TRPA1_F_clk856DDNCtM001_ch27
1120	CLK_TRPA1_F	clk856DDNCtM001_ch27	22.2	1319.6	1525.32	0.865129	CLK_TRPA1_F_clk856DDNCtM001_ch27
1121	CLK_TRPA1_F	clk856DDNCtM001_ch27	22.4	1301.33	1538.15	0.846034	CLK_TRPA1_F_clk856DDNCtM001_ch27
1122	CLK_TRPA1_F	clk856DDNCtM001_ch27	22.6	1491.28	1550.98	0.961508	CLK_TRPA1_F_clk856DDNCtM001_ch27
1123	CLK_TRPA1_F	clk856DDNCtM001_ch27	22.8	1561.46	1563.8	0.9985	CLK_TRPA1_F_clk856DDNCtM001_ch27
1124	CLK_TRPA1_F	clk856DDNCtM001_ch27	23	1621.86	1576.63	1.02869	CLK_TRPA1_F_clk856DDNCtM001_ch27
1125	CLK_TRPA1_F	clk856DDNCtM001_ch27	23.2	1734.2	1589.44	1.09107	CLK_TRPA1_F_clk856DDNCtM001_ch27
1126	CLK_TRPA1_F	clk856DDNCtM001_ch27	23.4	1855.46	1602.26	1.15803	CLK_TRPA1_F_clk856DDNCtM001_ch27
1127	CLK_TRPA1_F	clk856DDNCtM001_ch27	23.6	1838.36	1615.07	1.13825	CLK_TRPA1_F_clk856DDNCtM001_ch27
1128	CLK_TRPA1_F	clk856DDNCtM001_ch27	23.8	1795.24	1627.88	1.10281	CLK_TRPA1_F_clk856DDNCtM001_ch27
1129	CLK_TRPA1_F	clk856DDNCtM001_ch27	24	1902.12	1640.68	1.15935	CLK_TRPA1_F_clk856DDNCtM001_ch27
1130	CLK_TRPA1_F	clk856DDNCtM001_ch27	24.2	1800	1653.48	1.08861	CLK_TRPA1_F_clk856DDNCtM001_ch27
1131	CLK_TRPA1_F	clk856DDNCtM001_ch27	24.4	1635.21	1666.28	0.981356	CLK_TRPA1_F_clk856DDNCtM001_ch27
1132	CLK_TRPA1_F	clk856DDNCtM001_ch27	24.6	1627.34	1679.08	0.969187	CLK_TRPA1_F_clk856DDNCtM001_ch27
1133	CLK_TRPA1_F	clk856DDNCtM001_ch27	24.8	1687.06	1691.87	0.997162	CLK_TRPA1_F_clk856DDNCtM001_ch27
1134	CLK_TRPA1_F	clk856DDNCtM001_ch27	25	1635.04	1704.65	0.959161	CLK_TRPA1_F_clk856DDNCtM001_ch27
1135	CLK_TRPA1_F	clk856DDNCtM001_ch27	25.2	1662.43	1717.44	0.967968	CLK_TRPA1_F_clk856DDNCtM001_ch27
1136	CLK_TRPA1_F	clk856DDNCtM001_ch27	25.4	1561.2	1730.22	0.902313	CLK_TRPA1_F_clk856DDNCtM001_ch27
1137	CLK_TRPA1_F	clk856DDNCtM001_ch27	25.6	1592.81	1743	0.913835	CLK_TRPA1_F_clk856DDNCtM001_ch27
1138	CLK_TRPA1_F	clk856DDNCtM001_ch27	25.8	1525.39	1755.78	0.868783	CLK_TRPA1_F_clk856DDNCtM001_ch27
1139	CLK_TRPA1_F	clk856DDNCtM001_ch27	26	1568.21	1768.55	0.886722	CLK_TRPA1_F_clk856DDNCtM001_ch27
1140	CLK_TRPA1_F	clk856DDNCtM001_ch27	26.2	1550.08	1781.32	0.870184	CLK_TRPA1_F_clk856DDNCtM001_ch27
1141	CLK_TRPA1_F	clk856DDNCtM001_ch27	26.4	1459.41	1794.09	0.813454	CLK_TRPA1_F_clk856DDNCtM001_ch27
1142	CLK_TRPA1_F	clk856DDNCtM001_ch27	26.6	1486.98	1806.85	0.822968	CLK_TRPA1_F_clk856DDNCtM001_ch27
1143	CLK_TRPA1_F	clk856DDNCtM001_ch27	26.8	1597.15	1819.61	0.877745	CLK_TRPA1_F_clk856DDNCtM001_ch27
1144	CLK_TRPA1_F	clk856DDNCtM001_ch27	27	1480.98	1832.37	0.808235	CLK_TRPA1_F_clk856DDNCtM001_ch27
1145	CLK_TRPA1_F	clk856DDNCtM001_ch27	27.2	1502.58	1845.12	0.814351	CLK_TRPA1_F_clk856DDNCtM001_ch27
1146	CLK_TRPA1_F	clk856DDNCtM001_ch27	27.4	1611.4	1857.88	0.867332	CLK_TRPA1_F_clk856DDNCtM001_ch27
1147	CLK_TRPA1_F	clk856DDNCtM001_ch27	27.6	1506.72	1870.63	0.805463	CLK_TRPA1_F_clk856DDNCtM001_ch27
1148	CLK_TRPA1_F	clk856DDNCtM001_ch27	27.8	1602.9	1883.37	0.851076	CLK_TRPA1_F_clk856DDNCtM001_ch27
1149	CLK_TRPA1_F	clk856DDNCtM001_ch27	28	1545.6	1896.12	0.815136	CLK_TRPA1_F_clk856DDNCtM001_ch27
1150	CLK_TRPA1_F	clk856DDNCtM001_ch27	28.2	1533.11	1908.86	0.803156	CLK_TRPA1_F_clk856DDNCtM001_ch27
1151	CLK_TRPA1_F	clk856DDNCtM001_ch27	28.4	1548.2	1921.6	0.805684	CLK_TRPA1_F_clk856DDNCtM001_ch27
1152	CLK_TRPA1_F	clk856DDNCtM001_ch27	28.6	1636.7	1934.34	0.84613	CLK_TRPA1_F_clk856DDNCtM001_ch27
1153	CLK_TRPA1_F	clk856DDNCtM001_ch27	28.8	1632.37	1947.07	0.83837	CLK_TRPA1_F_clk856DDNCtM001_ch27
1154	CLK_TRPA1_F	clk856DDNCtM001_ch27	29	1766.28	1959.8	0.901252	CLK_TRPA1_F_clk856DDNCtM001_ch27
1155	CLK_TRPA1_F	clk856DDNCtM001_ch27	29.2	1604.95	1972.53	0.813651	CLK_TRPA1_F_clk856DDNCtM001_ch27
1156	CLK_TRPA1_F	clk856DDNCtM001_ch27	29.4	1655.4	1985.26	0.833847	CLK_TRPA1_F_clk856DDNCtM001_ch27
1157	CLK_TRPA1_F	clk856DDNCtM001_ch27	29.6	1651.55	1997.98	0.826609	CLK_TRPA1_F_clk856DDNCtM001_ch27
1158	CLK_TRPA1_F	clk856DDNCtM001_ch27	29.8	1625.82	2010.7	0.808581	CLK_TRPA1_F_clk856DDNCtM001_ch27
1159	CLK_TRPA1_F	clk856DDNCtM001_ch27	30	1708.71	2023.42	0.844463	CLK_TRPA1_F_clk856DDNCtM001_ch27
1160	CLK_TRPA1_F	clk856DDNCtM001_ch29	18	1092.52	1254.87	0.870625	CLK_TRPA1_F_clk856DDNCtM001_ch29
1161	CLK_TRPA1_F	clk856DDNCtM001_ch29	18.2	1015.7	1267.79	0.801154	CLK_TRPA1_F_clk856DDNCtM001_ch29
1162	CLK_TRPA1_F	clk856DDNCtM001_ch29	18.4	1054.96	1280.71	0.823728	CLK_TRPA1_F_clk856DDNCtM001_ch29
1163	CLK_TRPA1_F	clk856DDNCtM001_ch29	18.6	962.233	1293.63	0.743825	CLK_TRPA1_F_clk856DDNCtM001_ch29
1164	CLK_TRPA1_F	clk856DDNCtM001_ch29	18.8	944.896	1306.54	0.723206	CLK_TRPA1_F_clk856DDNCtM001_ch29
1165	CLK_TRPA1_F	clk856DDNCtM001_ch29	19	947.754	1319.44	0.718299	CLK_TRPA1_F_clk856DDNCtM001_ch29
1166	CLK_TRPA1_F	clk856DDNCtM001_ch29	19.2	1115.7	1332.34	0.837398	CLK_TRPA1_F_clk856DDNCtM001_ch29
1167	CLK_TRPA1_F	clk856DDNCtM001_ch29	19.4	1054.58	1345.24	0.783938	CLK_TRPA1_F_clk856DDNCtM001_ch29
1168	CLK_TRPA1_F	clk856DDNCtM001_ch29	19.6	1092.8	1358.13	0.804634	CLK_TRPA1_F_clk856DDNCtM001_ch29
1169	CLK_TRPA1_F	clk856DDNCtM001_ch29	19.8	1130.04	1371.01	0.824239	CLK_TRPA1_F_clk856DDNCtM001_ch29
1170	CLK_TRPA1_F	clk856DDNCtM001_ch29	20	1148.62	1383.89	0.82999	CLK_TRPA1_F_clk856DDNCtM001_ch29
1171	CLK_TRPA1_F	clk856DDNCtM001_ch29	20.2	1065.07	1396.77	0.762525	CLK_TRPA1_F_clk856DDNCtM001_ch29
1172	CLK_TRPA1_F	clk856DDNCtM001_ch29	20.4	1101.48	1409.64	0.781387	CLK_TRPA1_F_clk856DDNCtM001_ch29
1173	CLK_TRPA1_F	clk856DDNCtM001_ch29	20.6	1124.5	1422.51	0.790499	CLK_TRPA1_F_clk856DDNCtM001_ch29
1174	CLK_TRPA1_F	clk856DDNCtM001_ch29	20.8	1126.98	1435.38	0.785146	CLK_TRPA1_F_clk856DDNCtM001_ch29
1175	CLK_TRPA1_F	clk856DDNCtM001_ch29	21	1229.04	1448.24	0.848648	CLK_TRPA1_F_clk856DDNCtM001_ch29
1176	CLK_TRPA1_F	clk856DDNCtM001_ch29	21.2	1203.04	1461.09	0.823386	CLK_TRPA1_F_clk856DDNCtM001_ch29
1177	CLK_TRPA1_F	clk856DDNCtM001_ch29	21.4	1237.46	1473.95	0.839554	CLK_TRPA1_F_clk856DDNCtM001_ch29
1178	CLK_TRPA1_F	clk856DDNCtM001_ch29	21.6	1201.54	1486.79	0.808139	CLK_TRPA1_F_clk856DDNCtM001_ch29
1179	CLK_TRPA1_F	clk856DDNCtM001_ch29	21.8	1328.8	1499.64	0.88608	CLK_TRPA1_F_clk856DDNCtM001_ch29
1180	CLK_TRPA1_F	clk856DDNCtM001_ch29	22	1134.67	1512.48	0.750204	CLK_TRPA1_F_clk856DDNCtM001_ch29
1181	CLK_TRPA1_F	clk856DDNCtM001_ch29	22.2	1157.01	1525.32	0.758539	CLK_TRPA1_F_clk856DDNCtM001_ch29
1182	CLK_TRPA1_F	clk856DDNCtM001_ch29	22.4	1059.22	1538.15	0.688634	CLK_TRPA1_F_clk856DDNCtM001_ch29
1183	CLK_TRPA1_F	clk856DDNCtM001_ch29	22.6	1134.41	1550.98	0.731417	CLK_TRPA1_F_clk856DDNCtM001_ch29
1184	CLK_TRPA1_F	clk856DDNCtM001_ch29	22.8	1140.77	1563.8	0.729486	CLK_TRPA1_F_clk856DDNCtM001_ch29
1185	CLK_TRPA1_F	clk856DDNCtM001_ch29	23	1293.2	1576.63	0.820231	CLK_TRPA1_F_clk856DDNCtM001_ch29
1186	CLK_TRPA1_F	clk856DDNCtM001_ch29	23.2	1290.39	1589.44	0.811848	CLK_TRPA1_F_clk856DDNCtM001_ch29
1187	CLK_TRPA1_F	clk856DDNCtM001_ch29	23.4	1417.08	1602.26	0.884426	CLK_TRPA1_F_clk856DDNCtM001_ch29
1188	CLK_TRPA1_F	clk856DDNCtM001_ch29	23.6	1285.55	1615.07	0.795969	CLK_TRPA1_F_clk856DDNCtM001_ch29
1189	CLK_TRPA1_F	clk856DDNCtM001_ch29	23.8	1397.74	1627.88	0.858627	CLK_TRPA1_F_clk856DDNCtM001_ch29
1190	CLK_TRPA1_F	clk856DDNCtM001_ch29	24	1428.54	1640.68	0.870699	CLK_TRPA1_F_clk856DDNCtM001_ch29
1191	CLK_TRPA1_F	clk856DDNCtM001_ch29	24.2	1251.79	1653.48	0.757062	CLK_TRPA1_F_clk856DDNCtM001_ch29
1192	CLK_TRPA1_F	clk856DDNCtM001_ch29	24.4	1245.46	1666.28	0.747447	CLK_TRPA1_F_clk856DDNCtM001_ch29
1193	CLK_TRPA1_F	clk856DDNCtM001_ch29	24.6	1438	1679.08	0.856421	CLK_TRPA1_F_clk856DDNCtM001_ch29
1194	CLK_TRPA1_F	clk856DDNCtM001_ch29	24.8	1450.79	1691.87	0.857508	CLK_TRPA1_F_clk856DDNCtM001_ch29
1195	CLK_TRPA1_F	clk856DDNCtM001_ch29	25	1491.59	1704.65	0.875013	CLK_TRPA1_F_clk856DDNCtM001_ch29
1196	CLK_TRPA1_F	clk856DDNCtM001_ch29	25.2	1576.09	1717.44	0.9177	CLK_TRPA1_F_clk856DDNCtM001_ch29
1197	CLK_TRPA1_F	clk856DDNCtM001_ch29	25.4	1534.37	1730.22	0.886807	CLK_TRPA1_F_clk856DDNCtM001_ch29
1198	CLK_TRPA1_F	clk856DDNCtM001_ch29	25.6	1757.73	1743	1.00845	CLK_TRPA1_F_clk856DDNCtM001_ch29
1199	CLK_TRPA1_F	clk856DDNCtM001_ch29	25.8	1613.94	1755.78	0.919217	CLK_TRPA1_F_clk856DDNCtM001_ch29
1200	CLK_TRPA1_F	clk856DDNCtM001_ch29	26	1657.17	1768.55	0.937021	CLK_TRPA1_F_clk856DDNCtM001_ch29
1201	CLK_TRPA1_F	clk856DDNCtM001_ch29	26.2	1644.55	1781.32	0.92322	CLK_TRPA1_F_clk856DDNCtM001_ch29
1202	CLK_TRPA1_F	clk856DDNCtM001_ch29	26.4	1680.25	1794.09	0.936549	CLK_TRPA1_F_clk856DDNCtM001_ch29
1203	CLK_TRPA1_F	clk856DDNCtM001_ch29	26.6	1696.51	1806.85	0.938934	CLK_TRPA1_F_clk856DDNCtM001_ch29
1204	CLK_TRPA1_F	clk856DDNCtM001_ch29	26.8	1329.3	1819.61	0.730542	CLK_TRPA1_F_clk856DDNCtM001_ch29
1205	CLK_TRPA1_F	clk856DDNCtM001_ch29	27	1358.96	1832.37	0.74164	CLK_TRPA1_F_clk856DDNCtM001_ch29
1206	CLK_TRPA1_F	clk856DDNCtM001_ch29	27.2	1374.3	1845.12	0.744829	CLK_TRPA1_F_clk856DDNCtM001_ch29
1207	CLK_TRPA1_F	clk856DDNCtM001_ch29	27.4	1360.26	1857.88	0.732159	CLK_TRPA1_F_clk856DDNCtM001_ch29
1208	CLK_TRPA1_F	clk856DDNCtM001_ch29	27.6	1462.42	1870.63	0.78178	CLK_TRPA1_F_clk856DDNCtM001_ch29
1209	CLK_TRPA1_F	clk856DDNCtM001_ch29	27.8	1516.25	1883.37	0.805069	CLK_TRPA1_F_clk856DDNCtM001_ch29
1210	CLK_TRPA1_F	clk856DDNCtM001_ch29	28	1442.06	1896.12	0.760532	CLK_TRPA1_F_clk856DDNCtM001_ch29
1211	CLK_TRPA1_F	clk856DDNCtM001_ch29	28.2	1429.1	1908.86	0.748666	CLK_TRPA1_F_clk856DDNCtM001_ch29
1212	CLK_TRPA1_F	clk856DDNCtM001_ch29	28.4	1455.39	1921.6	0.757385	CLK_TRPA1_F_clk856DDNCtM001_ch29
1213	CLK_TRPA1_F	clk856DDNCtM001_ch29	28.6	1511.05	1934.34	0.781171	CLK_TRPA1_F_clk856DDNCtM001_ch29
1214	CLK_TRPA1_F	clk856DDNCtM001_ch29	28.8	1599.72	1947.07	0.821602	CLK_TRPA1_F_clk856DDNCtM001_ch29
1215	CLK_TRPA1_F	clk856DDNCtM001_ch29	29	1587.98	1959.8	0.810276	CLK_TRPA1_F_clk856DDNCtM001_ch29
1216	CLK_TRPA1_F	clk856DDNCtM001_ch29	29.2	1650.34	1972.53	0.836663	CLK_TRPA1_F_clk856DDNCtM001_ch29
1217	CLK_TRPA1_F	clk856DDNCtM001_ch29	29.4	1838.56	1985.26	0.926108	CLK_TRPA1_F_clk856DDNCtM001_ch29
1218	CLK_TRPA1_F	clk856DDNCtM001_ch29	29.6	1849.55	1997.98	0.925707	CLK_TRPA1_F_clk856DDNCtM001_ch29
1219	CLK_TRPA1_F	clk856DDNCtM001_ch29	29.8	1744.12	2010.7	0.867418	CLK_TRPA1_F_clk856DDNCtM001_ch29
1220	CLK_TRPA1_F	clk856DDNCtM001_ch29	30	1771.61	2023.42	0.875551	CLK_TRPA1_F_clk856DDNCtM001_ch29
1221	CLK_TRPA1_F	clk856DDNCtM001_ch31	18	936.817	1254.87	0.746545	CLK_TRPA1_F_clk856DDNCtM001_ch31
1222	CLK_TRPA1_F	clk856DDNCtM001_ch31	18.2	971.624	1267.79	0.766389	CLK_TRPA1_F_clk856DDNCtM001_ch31
1223	CLK_TRPA1_F	clk856DDNCtM001_ch31	18.4	978.672	1280.71	0.764161	CLK_TRPA1_F_clk856DDNCtM001_ch31
1224	CLK_TRPA1_F	clk856DDNCtM001_ch31	18.6	955.199	1293.63	0.738388	CLK_TRPA1_F_clk856DDNCtM001_ch31
1225	CLK_TRPA1_F	clk856DDNCtM001_ch31	18.8	987.014	1306.54	0.755443	CLK_TRPA1_F_clk856DDNCtM001_ch31
1226	CLK_TRPA1_F	clk856DDNCtM001_ch31	19	1042.35	1319.44	0.789992	CLK_TRPA1_F_clk856DDNCtM001_ch31
1227	CLK_TRPA1_F	clk856DDNCtM001_ch31	19.2	1034.29	1332.34	0.776298	CLK_TRPA1_F_clk856DDNCtM001_ch31
1228	CLK_TRPA1_F	clk856DDNCtM001_ch31	19.4	1018.93	1345.24	0.757436	CLK_TRPA1_F_clk856DDNCtM001_ch31
1229	CLK_TRPA1_F	clk856DDNCtM001_ch31	19.6	1052.24	1358.13	0.774775	CLK_TRPA1_F_clk856DDNCtM001_ch31
1230	CLK_TRPA1_F	clk856DDNCtM001_ch31	19.8	1073.57	1371.01	0.783047	CLK_TRPA1_F_clk856DDNCtM001_ch31
1231	CLK_TRPA1_F	clk856DDNCtM001_ch31	20	1136.01	1383.89	0.820879	CLK_TRPA1_F_clk856DDNCtM001_ch31
1232	CLK_TRPA1_F	clk856DDNCtM001_ch31	20.2	1105.06	1396.77	0.791153	CLK_TRPA1_F_clk856DDNCtM001_ch31
1233	CLK_TRPA1_F	clk856DDNCtM001_ch31	20.4	1089.63	1409.64	0.772984	CLK_TRPA1_F_clk856DDNCtM001_ch31
1234	CLK_TRPA1_F	clk856DDNCtM001_ch31	20.6	1160.01	1422.51	0.815468	CLK_TRPA1_F_clk856DDNCtM001_ch31
1235	CLK_TRPA1_F	clk856DDNCtM001_ch31	20.8	1080.08	1435.38	0.752468	CLK_TRPA1_F_clk856DDNCtM001_ch31
1236	CLK_TRPA1_F	clk856DDNCtM001_ch31	21	1166.07	1448.24	0.805161	CLK_TRPA1_F_clk856DDNCtM001_ch31
1237	CLK_TRPA1_F	clk856DDNCtM001_ch31	21.2	1059.37	1461.09	0.725052	CLK_TRPA1_F_clk856DDNCtM001_ch31
1238	CLK_TRPA1_F	clk856DDNCtM001_ch31	21.4	1139.38	1473.95	0.773011	CLK_TRPA1_F_clk856DDNCtM001_ch31
1239	CLK_TRPA1_F	clk856DDNCtM001_ch31	21.6	1124.11	1486.79	0.756062	CLK_TRPA1_F_clk856DDNCtM001_ch31
1240	CLK_TRPA1_F	clk856DDNCtM001_ch31	21.8	1273	1499.64	0.848873	CLK_TRPA1_F_clk856DDNCtM001_ch31
1241	CLK_TRPA1_F	clk856DDNCtM001_ch31	22	1112.96	1512.48	0.735849	CLK_TRPA1_F_clk856DDNCtM001_ch31
1242	CLK_TRPA1_F	clk856DDNCtM001_ch31	22.2	1198.69	1525.32	0.785862	CLK_TRPA1_F_clk856DDNCtM001_ch31
1243	CLK_TRPA1_F	clk856DDNCtM001_ch31	22.4	1197.95	1538.15	0.778828	CLK_TRPA1_F_clk856DDNCtM001_ch31
1244	CLK_TRPA1_F	clk856DDNCtM001_ch31	22.6	1285.36	1550.98	0.82874	CLK_TRPA1_F_clk856DDNCtM001_ch31
1245	CLK_TRPA1_F	clk856DDNCtM001_ch31	22.8	1208.21	1563.8	0.772613	CLK_TRPA1_F_clk856DDNCtM001_ch31
1246	CLK_TRPA1_F	clk856DDNCtM001_ch31	23	1231.98	1576.63	0.781402	CLK_TRPA1_F_clk856DDNCtM001_ch31
1247	CLK_TRPA1_F	clk856DDNCtM001_ch31	23.2	1293.36	1589.44	0.813721	CLK_TRPA1_F_clk856DDNCtM001_ch31
1248	CLK_TRPA1_F	clk856DDNCtM001_ch31	23.4	1364.82	1602.26	0.851809	CLK_TRPA1_F_clk856DDNCtM001_ch31
1249	CLK_TRPA1_F	clk856DDNCtM001_ch31	23.6	1341.95	1615.07	0.830895	CLK_TRPA1_F_clk856DDNCtM001_ch31
1250	CLK_TRPA1_F	clk856DDNCtM001_ch31	23.8	1446.35	1627.88	0.888489	CLK_TRPA1_F_clk856DDNCtM001_ch31
1251	CLK_TRPA1_F	clk856DDNCtM001_ch31	24	1671.14	1640.68	1.01857	CLK_TRPA1_F_clk856DDNCtM001_ch31
1252	CLK_TRPA1_F	clk856DDNCtM001_ch31	24.2	1606.79	1653.48	0.971758	CLK_TRPA1_F_clk856DDNCtM001_ch31
1253	CLK_TRPA1_F	clk856DDNCtM001_ch31	24.4	1813.12	1666.28	1.08813	CLK_TRPA1_F_clk856DDNCtM001_ch31
1254	CLK_TRPA1_F	clk856DDNCtM001_ch31	24.6	1822.14	1679.08	1.0852	CLK_TRPA1_F_clk856DDNCtM001_ch31
1255	CLK_TRPA1_F	clk856DDNCtM001_ch31	24.8	1942.05	1691.87	1.14787	CLK_TRPA1_F_clk856DDNCtM001_ch31
1256	CLK_TRPA1_F	clk856DDNCtM001_ch31	25	2019.82	1704.65	1.18488	CLK_TRPA1_F_clk856DDNCtM001_ch31
1257	CLK_TRPA1_F	clk856DDNCtM001_ch31	25.2	2127.16	1717.44	1.23856	CLK_TRPA1_F_clk856DDNCtM001_ch31
1258	CLK_TRPA1_F	clk856DDNCtM001_ch31	25.4	2243.74	1730.22	1.29679	CLK_TRPA1_F_clk856DDNCtM001_ch31
1259	CLK_TRPA1_F	clk856DDNCtM001_ch31	25.6	2246.68	1743	1.28897	CLK_TRPA1_F_clk856DDNCtM001_ch31
1260	CLK_TRPA1_F	clk856DDNCtM001_ch31	25.8	2180.53	1755.78	1.24192	CLK_TRPA1_F_clk856DDNCtM001_ch31
1261	CLK_TRPA1_F	clk856DDNCtM001_ch31	26	2024.2	1768.55	1.14455	CLK_TRPA1_F_clk856DDNCtM001_ch31
1262	CLK_TRPA1_F	clk856DDNCtM001_ch31	26.2	1886.52	1781.32	1.05906	CLK_TRPA1_F_clk856DDNCtM001_ch31
1263	CLK_TRPA1_F	clk856DDNCtM001_ch31	26.4	1838.87	1794.09	1.02496	CLK_TRPA1_F_clk856DDNCtM001_ch31
1264	CLK_TRPA1_F	clk856DDNCtM001_ch31	26.6	1734.01	1806.85	0.959685	CLK_TRPA1_F_clk856DDNCtM001_ch31
1265	CLK_TRPA1_F	clk856DDNCtM001_ch31	26.8	1560.9	1819.61	0.857821	CLK_TRPA1_F_clk856DDNCtM001_ch31
1266	CLK_TRPA1_F	clk856DDNCtM001_ch31	27	1571.6	1832.37	0.857687	CLK_TRPA1_F_clk856DDNCtM001_ch31
1267	CLK_TRPA1_F	clk856DDNCtM001_ch31	27.2	1626.6	1845.12	0.881568	CLK_TRPA1_F_clk856DDNCtM001_ch31
1268	CLK_TRPA1_F	clk856DDNCtM001_ch31	27.4	1453.73	1857.88	0.782466	CLK_TRPA1_F_clk856DDNCtM001_ch31
1269	CLK_TRPA1_F	clk856DDNCtM001_ch31	27.6	1474.47	1870.63	0.788225	CLK_TRPA1_F_clk856DDNCtM001_ch31
1270	CLK_TRPA1_F	clk856DDNCtM001_ch31	27.8	1457.56	1883.37	0.773911	CLK_TRPA1_F_clk856DDNCtM001_ch31
1271	CLK_TRPA1_F	clk856DDNCtM001_ch31	28	1468.44	1896.12	0.774443	CLK_TRPA1_F_clk856DDNCtM001_ch31
1272	CLK_TRPA1_F	clk856DDNCtM001_ch31	28.2	1492.91	1908.86	0.782097	CLK_TRPA1_F_clk856DDNCtM001_ch31
1273	CLK_TRPA1_F	clk856DDNCtM001_ch31	28.4	1529.47	1921.6	0.795933	CLK_TRPA1_F_clk856DDNCtM001_ch31
1274	CLK_TRPA1_F	clk856DDNCtM001_ch31	28.6	1491.65	1934.34	0.771143	CLK_TRPA1_F_clk856DDNCtM001_ch31
1275	CLK_TRPA1_F	clk856DDNCtM001_ch31	28.8	1491.27	1947.07	0.765903	CLK_TRPA1_F_clk856DDNCtM001_ch31
1276	CLK_TRPA1_F	clk856DDNCtM001_ch31	29	1587.7	1959.8	0.810133	CLK_TRPA1_F_clk856DDNCtM001_ch31
1277	CLK_TRPA1_F	clk856DDNCtM001_ch31	29.2	1618.94	1972.53	0.820742	CLK_TRPA1_F_clk856DDNCtM001_ch31
1278	CLK_TRPA1_F	clk856DDNCtM001_ch31	29.4	1557.43	1985.26	0.784499	CLK_TRPA1_F_clk856DDNCtM001_ch31
1279	CLK_TRPA1_F	clk856DDNCtM001_ch31	29.6	1629.63	1997.98	0.815637	CLK_TRPA1_F_clk856DDNCtM001_ch31
1280	CLK_TRPA1_F	clk856DDNCtM001_ch31	29.8	1587.78	2010.7	0.789662	CLK_TRPA1_F_clk856DDNCtM001_ch31
1281	CLK_TRPA1_F	clk856DDNCtM001_ch31	30	1635.53	2023.42	0.808299	CLK_TRPA1_F_clk856DDNCtM001_ch31
1282	CLK_TRPA1_F	clk856DDNCtM006_ch30	18	952.169	1254.87	0.758779	CLK_TRPA1_F_clk856DDNCtM006_ch30
1283	CLK_TRPA1_F	clk856DDNCtM006_ch30	18.2	973.762	1267.79	0.768076	CLK_TRPA1_F_clk856DDNCtM006_ch30
1284	CLK_TRPA1_F	clk856DDNCtM006_ch30	18.4	1027.28	1280.71	0.802119	CLK_TRPA1_F_clk856DDNCtM006_ch30
1285	CLK_TRPA1_F	clk856DDNCtM006_ch30	18.6	915.123	1293.63	0.707408	CLK_TRPA1_F_clk856DDNCtM006_ch30
1286	CLK_TRPA1_F	clk856DDNCtM006_ch30	18.8	953.209	1306.54	0.729569	CLK_TRPA1_F_clk856DDNCtM006_ch30
1287	CLK_TRPA1_F	clk856DDNCtM006_ch30	19	1060.69	1319.44	0.803895	CLK_TRPA1_F_clk856DDNCtM006_ch30
1288	CLK_TRPA1_F	clk856DDNCtM006_ch30	19.2	1003.89	1332.34	0.75348	CLK_TRPA1_F_clk856DDNCtM006_ch30
1289	CLK_TRPA1_F	clk856DDNCtM006_ch30	19.4	1039.45	1345.24	0.772686	CLK_TRPA1_F_clk856DDNCtM006_ch30
1290	CLK_TRPA1_F	clk856DDNCtM006_ch30	19.6	1015.33	1358.13	0.747595	CLK_TRPA1_F_clk856DDNCtM006_ch30
1291	CLK_TRPA1_F	clk856DDNCtM006_ch30	19.8	1064.4	1371.01	0.776359	CLK_TRPA1_F_clk856DDNCtM006_ch30
1292	CLK_TRPA1_F	clk856DDNCtM006_ch30	20	1158.02	1383.89	0.836785	CLK_TRPA1_F_clk856DDNCtM006_ch30
1293	CLK_TRPA1_F	clk856DDNCtM006_ch30	20.2	989.447	1396.77	0.708381	CLK_TRPA1_F_clk856DDNCtM006_ch30
1294	CLK_TRPA1_F	clk856DDNCtM006_ch30	20.4	1146.43	1409.64	0.813275	CLK_TRPA1_F_clk856DDNCtM006_ch30
1295	CLK_TRPA1_F	clk856DDNCtM006_ch30	20.6	1068.67	1422.51	0.751256	CLK_TRPA1_F_clk856DDNCtM006_ch30
1296	CLK_TRPA1_F	clk856DDNCtM006_ch30	20.8	1045.3	1435.38	0.728239	CLK_TRPA1_F_clk856DDNCtM006_ch30
1297	CLK_TRPA1_F	clk856DDNCtM006_ch30	21	1121.77	1448.24	0.774574	CLK_TRPA1_F_clk856DDNCtM006_ch30
1298	CLK_TRPA1_F	clk856DDNCtM006_ch30	21.2	1098.77	1461.09	0.752016	CLK_TRPA1_F_clk856DDNCtM006_ch30
1299	CLK_TRPA1_F	clk856DDNCtM006_ch30	21.4	1105.59	1473.95	0.75009	CLK_TRPA1_F_clk856DDNCtM006_ch30
1300	CLK_TRPA1_F	clk856DDNCtM006_ch30	21.6	1100.28	1486.79	0.740032	CLK_TRPA1_F_clk856DDNCtM006_ch30
1301	CLK_TRPA1_F	clk856DDNCtM006_ch30	21.8	1150.88	1499.64	0.767436	CLK_TRPA1_F_clk856DDNCtM006_ch30
1302	CLK_TRPA1_F	clk856DDNCtM006_ch30	22	1094.29	1512.48	0.723508	CLK_TRPA1_F_clk856DDNCtM006_ch30
1303	CLK_TRPA1_F	clk856DDNCtM006_ch30	22.2	1133.59	1525.32	0.743181	CLK_TRPA1_F_clk856DDNCtM006_ch30
1304	CLK_TRPA1_F	clk856DDNCtM006_ch30	22.4	1197.77	1538.15	0.778707	CLK_TRPA1_F_clk856DDNCtM006_ch30
1305	CLK_TRPA1_F	clk856DDNCtM006_ch30	22.6	1279.88	1550.98	0.825211	CLK_TRPA1_F_clk856DDNCtM006_ch30
1306	CLK_TRPA1_F	clk856DDNCtM006_ch30	22.8	1406.9	1563.8	0.899664	CLK_TRPA1_F_clk856DDNCtM006_ch30
1307	CLK_TRPA1_F	clk856DDNCtM006_ch30	23	1455.52	1576.63	0.923185	CLK_TRPA1_F_clk856DDNCtM006_ch30
1308	CLK_TRPA1_F	clk856DDNCtM006_ch30	23.2	1543.89	1589.44	0.971338	CLK_TRPA1_F_clk856DDNCtM006_ch30
1309	CLK_TRPA1_F	clk856DDNCtM006_ch30	23.4	1619.79	1602.26	1.01094	CLK_TRPA1_F_clk856DDNCtM006_ch30
1310	CLK_TRPA1_F	clk856DDNCtM006_ch30	23.6	1654.26	1615.07	1.02426	CLK_TRPA1_F_clk856DDNCtM006_ch30
1311	CLK_TRPA1_F	clk856DDNCtM006_ch30	23.8	1735.99	1627.88	1.06641	CLK_TRPA1_F_clk856DDNCtM006_ch30
1312	CLK_TRPA1_F	clk856DDNCtM006_ch30	24	1802.88	1640.68	1.09886	CLK_TRPA1_F_clk856DDNCtM006_ch30
1313	CLK_TRPA1_F	clk856DDNCtM006_ch30	24.2	1564.06	1653.48	0.945917	CLK_TRPA1_F_clk856DDNCtM006_ch30
1314	CLK_TRPA1_F	clk856DDNCtM006_ch30	24.4	1490.15	1666.28	0.894297	CLK_TRPA1_F_clk856DDNCtM006_ch30
1315	CLK_TRPA1_F	clk856DDNCtM006_ch30	24.6	1455.32	1679.08	0.866736	CLK_TRPA1_F_clk856DDNCtM006_ch30
1316	CLK_TRPA1_F	clk856DDNCtM006_ch30	24.8	1491.94	1691.87	0.881828	CLK_TRPA1_F_clk856DDNCtM006_ch30
1317	CLK_TRPA1_F	clk856DDNCtM006_ch30	25	1375.63	1704.65	0.806983	CLK_TRPA1_F_clk856DDNCtM006_ch30
1318	CLK_TRPA1_F	clk856DDNCtM006_ch30	25.2	1524.1	1717.44	0.887424	CLK_TRPA1_F_clk856DDNCtM006_ch30
1319	CLK_TRPA1_F	clk856DDNCtM006_ch30	25.4	1402.58	1730.22	0.810637	CLK_TRPA1_F_clk856DDNCtM006_ch30
1320	CLK_TRPA1_F	clk856DDNCtM006_ch30	25.6	1478.44	1743	0.848216	CLK_TRPA1_F_clk856DDNCtM006_ch30
1321	CLK_TRPA1_F	clk856DDNCtM006_ch30	25.8	1386.52	1755.78	0.78969	CLK_TRPA1_F_clk856DDNCtM006_ch30
1322	CLK_TRPA1_F	clk856DDNCtM006_ch30	26	1320.41	1768.55	0.746609	CLK_TRPA1_F_clk856DDNCtM006_ch30
1323	CLK_TRPA1_F	clk856DDNCtM006_ch30	26.2	1388.26	1781.32	0.779341	CLK_TRPA1_F_clk856DDNCtM006_ch30
1324	CLK_TRPA1_F	clk856DDNCtM006_ch30	26.4	1356.97	1794.09	0.756357	CLK_TRPA1_F_clk856DDNCtM006_ch30
1325	CLK_TRPA1_F	clk856DDNCtM006_ch30	26.6	1563.51	1806.85	0.865325	CLK_TRPA1_F_clk856DDNCtM006_ch30
1326	CLK_TRPA1_F	clk856DDNCtM006_ch30	26.8	1278.57	1819.61	0.702661	CLK_TRPA1_F_clk856DDNCtM006_ch30
1327	CLK_TRPA1_F	clk856DDNCtM006_ch30	27	1332.74	1832.37	0.727329	CLK_TRPA1_F_clk856DDNCtM006_ch30
1328	CLK_TRPA1_F	clk856DDNCtM006_ch30	27.2	1409.06	1845.12	0.763665	CLK_TRPA1_F_clk856DDNCtM006_ch30
1329	CLK_TRPA1_F	clk856DDNCtM006_ch30	27.4	1373.74	1857.88	0.739416	CLK_TRPA1_F_clk856DDNCtM006_ch30
1330	CLK_TRPA1_F	clk856DDNCtM006_ch30	27.6	1398.27	1870.63	0.747488	CLK_TRPA1_F_clk856DDNCtM006_ch30
1331	CLK_TRPA1_F	clk856DDNCtM006_ch30	27.8	1488.5	1883.37	0.790336	CLK_TRPA1_F_clk856DDNCtM006_ch30
1332	CLK_TRPA1_F	clk856DDNCtM006_ch30	28	1539.38	1896.12	0.811859	CLK_TRPA1_F_clk856DDNCtM006_ch30
1333	CLK_TRPA1_F	clk856DDNCtM006_ch30	28.2	1480.57	1908.86	0.77563	CLK_TRPA1_F_clk856DDNCtM006_ch30
1334	CLK_TRPA1_F	clk856DDNCtM006_ch30	28.4	1464.05	1921.6	0.761893	CLK_TRPA1_F_clk856DDNCtM006_ch30
1335	CLK_TRPA1_F	clk856DDNCtM006_ch30	28.6	1435.49	1934.34	0.742107	CLK_TRPA1_F_clk856DDNCtM006_ch30
1336	CLK_TRPA1_F	clk856DDNCtM006_ch30	28.8	1520.79	1947.07	0.781066	CLK_TRPA1_F_clk856DDNCtM006_ch30
1337	CLK_TRPA1_F	clk856DDNCtM006_ch30	29	1527.67	1959.8	0.779501	CLK_TRPA1_F_clk856DDNCtM006_ch30
1338	CLK_TRPA1_F	clk856DDNCtM006_ch30	29.2	1555.25	1972.53	0.788455	CLK_TRPA1_F_clk856DDNCtM006_ch30
1339	CLK_TRPA1_F	clk856DDNCtM006_ch30	29.4	1529.07	1985.26	0.77021	CLK_TRPA1_F_clk856DDNCtM006_ch30
1340	CLK_TRPA1_F	clk856DDNCtM006_ch30	29.6	1611.69	1997.98	0.806657	CLK_TRPA1_F_clk856DDNCtM006_ch30
1341	CLK_TRPA1_F	clk856DDNCtM006_ch30	29.8	1552.89	2010.7	0.77231	CLK_TRPA1_F_clk856DDNCtM006_ch30
1342	CLK_TRPA1_F	clk856DDNCtM006_ch30	30	1699.56	2023.42	0.839942	CLK_TRPA1_F_clk856DDNCtM006_ch30
1343	CLK_TRPA1_F	clk856DDNCtM006_ch32	18	1028.4	1254.87	0.81953	CLK_TRPA1_F_clk856DDNCtM006_ch32
1344	CLK_TRPA1_F	clk856DDNCtM006_ch32	18.2	1056.53	1267.79	0.833361	CLK_TRPA1_F_clk856DDNCtM006_ch32
1345	CLK_TRPA1_F	clk856DDNCtM006_ch32	18.4	1135.22	1280.71	0.886399	CLK_TRPA1_F_clk856DDNCtM006_ch32
1346	CLK_TRPA1_F	clk856DDNCtM006_ch32	18.6	1050.77	1293.63	0.812265	CLK_TRPA1_F_clk856DDNCtM006_ch32
1347	CLK_TRPA1_F	clk856DDNCtM006_ch32	18.8	945.138	1306.54	0.723392	CLK_TRPA1_F_clk856DDNCtM006_ch32
1348	CLK_TRPA1_F	clk856DDNCtM006_ch32	19	985.836	1319.44	0.747161	CLK_TRPA1_F_clk856DDNCtM006_ch32
1349	CLK_TRPA1_F	clk856DDNCtM006_ch32	19.2	1117.4	1332.34	0.838674	CLK_TRPA1_F_clk856DDNCtM006_ch32
1350	CLK_TRPA1_F	clk856DDNCtM006_ch32	19.4	1035.6	1345.24	0.76983	CLK_TRPA1_F_clk856DDNCtM006_ch32
1351	CLK_TRPA1_F	clk856DDNCtM006_ch32	19.6	1114.34	1358.13	0.820499	CLK_TRPA1_F_clk856DDNCtM006_ch32
1352	CLK_TRPA1_F	clk856DDNCtM006_ch32	19.8	1158	1371.01	0.844632	CLK_TRPA1_F_clk856DDNCtM006_ch32
1353	CLK_TRPA1_F	clk856DDNCtM006_ch32	20	1161.31	1383.89	0.839157	CLK_TRPA1_F_clk856DDNCtM006_ch32
1354	CLK_TRPA1_F	clk856DDNCtM006_ch32	20.2	1076.53	1396.77	0.77073	CLK_TRPA1_F_clk856DDNCtM006_ch32
1355	CLK_TRPA1_F	clk856DDNCtM006_ch32	20.4	1107.59	1409.64	0.785721	CLK_TRPA1_F_clk856DDNCtM006_ch32
1356	CLK_TRPA1_F	clk856DDNCtM006_ch32	20.6	1169.64	1422.51	0.822238	CLK_TRPA1_F_clk856DDNCtM006_ch32
1357	CLK_TRPA1_F	clk856DDNCtM006_ch32	20.8	1199.97	1435.38	0.835997	CLK_TRPA1_F_clk856DDNCtM006_ch32
1358	CLK_TRPA1_F	clk856DDNCtM006_ch32	21	1111.44	1448.24	0.767446	CLK_TRPA1_F_clk856DDNCtM006_ch32
1359	CLK_TRPA1_F	clk856DDNCtM006_ch32	21.2	1137.82	1461.09	0.778748	CLK_TRPA1_F_clk856DDNCtM006_ch32
1360	CLK_TRPA1_F	clk856DDNCtM006_ch32	21.4	1198.14	1473.95	0.812877	CLK_TRPA1_F_clk856DDNCtM006_ch32
1361	CLK_TRPA1_F	clk856DDNCtM006_ch32	21.6	1224.06	1486.79	0.823285	CLK_TRPA1_F_clk856DDNCtM006_ch32
1362	CLK_TRPA1_F	clk856DDNCtM006_ch32	21.8	1315.45	1499.64	0.877177	CLK_TRPA1_F_clk856DDNCtM006_ch32
1363	CLK_TRPA1_F	clk856DDNCtM006_ch32	22	1258.25	1512.48	0.831915	CLK_TRPA1_F_clk856DDNCtM006_ch32
1364	CLK_TRPA1_F	clk856DDNCtM006_ch32	22.2	1277.35	1525.32	0.837432	CLK_TRPA1_F_clk856DDNCtM006_ch32
1365	CLK_TRPA1_F	clk856DDNCtM006_ch32	22.4	1190.98	1538.15	0.774292	CLK_TRPA1_F_clk856DDNCtM006_ch32
1366	CLK_TRPA1_F	clk856DDNCtM006_ch32	22.6	1263.1	1550.98	0.814389	CLK_TRPA1_F_clk856DDNCtM006_ch32
1367	CLK_TRPA1_F	clk856DDNCtM006_ch32	22.8	1235.36	1563.8	0.78997	CLK_TRPA1_F_clk856DDNCtM006_ch32
1368	CLK_TRPA1_F	clk856DDNCtM006_ch32	23	1320.61	1576.63	0.837615	CLK_TRPA1_F_clk856DDNCtM006_ch32
1369	CLK_TRPA1_F	clk856DDNCtM006_ch32	23.2	1343.37	1589.44	0.845183	CLK_TRPA1_F_clk856DDNCtM006_ch32
1370	CLK_TRPA1_F	clk856DDNCtM006_ch32	23.4	1325.98	1602.26	0.827568	CLK_TRPA1_F_clk856DDNCtM006_ch32
1371	CLK_TRPA1_F	clk856DDNCtM006_ch32	23.6	1330.17	1615.07	0.8236	CLK_TRPA1_F_clk856DDNCtM006_ch32
1372	CLK_TRPA1_F	clk856DDNCtM006_ch32	23.8	1418.94	1627.88	0.871649	CLK_TRPA1_F_clk856DDNCtM006_ch32
1373	CLK_TRPA1_F	clk856DDNCtM006_ch32	24	1456.49	1640.68	0.887735	CLK_TRPA1_F_clk856DDNCtM006_ch32
1374	CLK_TRPA1_F	clk856DDNCtM006_ch32	24.2	1415.32	1653.48	0.855962	CLK_TRPA1_F_clk856DDNCtM006_ch32
1375	CLK_TRPA1_F	clk856DDNCtM006_ch32	24.4	1420.36	1666.28	0.852414	CLK_TRPA1_F_clk856DDNCtM006_ch32
1376	CLK_TRPA1_F	clk856DDNCtM006_ch32	24.6	1430.72	1679.08	0.852088	CLK_TRPA1_F_clk856DDNCtM006_ch32
1377	CLK_TRPA1_F	clk856DDNCtM006_ch32	24.8	1541.99	1691.87	0.911412	CLK_TRPA1_F_clk856DDNCtM006_ch32
1378	CLK_TRPA1_F	clk856DDNCtM006_ch32	25	1574.92	1704.65	0.923893	CLK_TRPA1_F_clk856DDNCtM006_ch32
1379	CLK_TRPA1_F	clk856DDNCtM006_ch32	25.2	1715.11	1717.44	0.998646	CLK_TRPA1_F_clk856DDNCtM006_ch32
1380	CLK_TRPA1_F	clk856DDNCtM006_ch32	25.4	1750.34	1730.22	1.01163	CLK_TRPA1_F_clk856DDNCtM006_ch32
1381	CLK_TRPA1_F	clk856DDNCtM006_ch32	25.6	1786.42	1743	1.02491	CLK_TRPA1_F_clk856DDNCtM006_ch32
1382	CLK_TRPA1_F	clk856DDNCtM006_ch32	25.8	1702.89	1755.78	0.969881	CLK_TRPA1_F_clk856DDNCtM006_ch32
1383	CLK_TRPA1_F	clk856DDNCtM006_ch32	26	1737.21	1768.55	0.982278	CLK_TRPA1_F_clk856DDNCtM006_ch32
1384	CLK_TRPA1_F	clk856DDNCtM006_ch32	26.2	1786.86	1781.32	1.00311	CLK_TRPA1_F_clk856DDNCtM006_ch32
1385	CLK_TRPA1_F	clk856DDNCtM006_ch32	26.4	1577.72	1794.09	0.879402	CLK_TRPA1_F_clk856DDNCtM006_ch32
1386	CLK_TRPA1_F	clk856DDNCtM006_ch32	26.6	1686.28	1806.85	0.933272	CLK_TRPA1_F_clk856DDNCtM006_ch32
1387	CLK_TRPA1_F	clk856DDNCtM006_ch32	26.8	1536.38	1819.61	0.844344	CLK_TRPA1_F_clk856DDNCtM006_ch32
1388	CLK_TRPA1_F	clk856DDNCtM006_ch32	27	1572.36	1832.37	0.858101	CLK_TRPA1_F_clk856DDNCtM006_ch32
1389	CLK_TRPA1_F	clk856DDNCtM006_ch32	27.2	1533.97	1845.12	0.831366	CLK_TRPA1_F_clk856DDNCtM006_ch32
1390	CLK_TRPA1_F	clk856DDNCtM006_ch32	27.4	1485.16	1857.88	0.799384	CLK_TRPA1_F_clk856DDNCtM006_ch32
1391	CLK_TRPA1_F	clk856DDNCtM006_ch32	27.6	1541.43	1870.63	0.824019	CLK_TRPA1_F_clk856DDNCtM006_ch32
1392	CLK_TRPA1_F	clk856DDNCtM006_ch32	27.8	1574.93	1883.37	0.836225	CLK_TRPA1_F_clk856DDNCtM006_ch32
1393	CLK_TRPA1_F	clk856DDNCtM006_ch32	28	1555.04	1896.12	0.820117	CLK_TRPA1_F_clk856DDNCtM006_ch32
1394	CLK_TRPA1_F	clk856DDNCtM006_ch32	28.2	1568.06	1908.86	0.821463	CLK_TRPA1_F_clk856DDNCtM006_ch32
1395	CLK_TRPA1_F	clk856DDNCtM006_ch32	28.4	1712.75	1921.6	0.891316	CLK_TRPA1_F_clk856DDNCtM006_ch32
1396	CLK_TRPA1_F	clk856DDNCtM006_ch32	28.6	1532.88	1934.34	0.792456	CLK_TRPA1_F_clk856DDNCtM006_ch32
1397	CLK_TRPA1_F	clk856DDNCtM006_ch32	28.8	1630.97	1947.07	0.837653	CLK_TRPA1_F_clk856DDNCtM006_ch32
1398	CLK_TRPA1_F	clk856DDNCtM006_ch32	29	1602.54	1959.8	0.817702	CLK_TRPA1_F_clk856DDNCtM006_ch32
1399	CLK_TRPA1_F	clk856DDNCtM006_ch32	29.2	1650.14	1972.53	0.836559	CLK_TRPA1_F_clk856DDNCtM006_ch32
1400	CLK_TRPA1_F	clk856DDNCtM006_ch32	29.4	1608.3	1985.26	0.810123	CLK_TRPA1_F_clk856DDNCtM006_ch32
1401	CLK_TRPA1_F	clk856DDNCtM006_ch32	29.6	1668.91	1997.98	0.835299	CLK_TRPA1_F_clk856DDNCtM006_ch32
1402	CLK_TRPA1_F	clk856DDNCtM006_ch32	29.8	1676.36	2010.7	0.833717	CLK_TRPA1_F_clk856DDNCtM006_ch32
1403	CLK_TRPA1_F	clk856DDNCtM006_ch32	30	1747.19	2023.42	0.863483	CLK_TRPA1_F_clk856DDNCtM006_ch32
1404	CLK_TRPA1_F	clk856DDNCtM007_ch2	18	1060.51	1254.87	0.845118	CLK_TRPA1_F_clk856DDNCtM007_ch2
1405	CLK_TRPA1_F	clk856DDNCtM007_ch2	18.2	991.46	1267.79	0.782035	CLK_TRPA1_F_clk856DDNCtM007_ch2
1406	CLK_TRPA1_F	clk856DDNCtM007_ch2	18.4	1019.56	1280.71	0.796087	CLK_TRPA1_F_clk856DDNCtM007_ch2
1407	CLK_TRPA1_F	clk856DDNCtM007_ch2	18.6	1077.13	1293.63	0.832639	CLK_TRPA1_F_clk856DDNCtM007_ch2
1408	CLK_TRPA1_F	clk856DDNCtM007_ch2	18.8	1017.87	1306.54	0.77906	CLK_TRPA1_F_clk856DDNCtM007_ch2
1409	CLK_TRPA1_F	clk856DDNCtM007_ch2	19	1101.48	1319.44	0.834808	CLK_TRPA1_F_clk856DDNCtM007_ch2
1410	CLK_TRPA1_F	clk856DDNCtM007_ch2	19.2	1057.31	1332.34	0.793574	CLK_TRPA1_F_clk856DDNCtM007_ch2
1411	CLK_TRPA1_F	clk856DDNCtM007_ch2	19.4	1037.36	1345.24	0.771139	CLK_TRPA1_F_clk856DDNCtM007_ch2
1412	CLK_TRPA1_F	clk856DDNCtM007_ch2	19.6	1136.52	1358.13	0.836827	CLK_TRPA1_F_clk856DDNCtM007_ch2
1413	CLK_TRPA1_F	clk856DDNCtM007_ch2	19.8	1105.37	1371.01	0.806243	CLK_TRPA1_F_clk856DDNCtM007_ch2
1414	CLK_TRPA1_F	clk856DDNCtM007_ch2	20	1210.36	1383.89	0.874605	CLK_TRPA1_F_clk856DDNCtM007_ch2
1415	CLK_TRPA1_F	clk856DDNCtM007_ch2	20.2	1100.85	1396.77	0.788142	CLK_TRPA1_F_clk856DDNCtM007_ch2
1416	CLK_TRPA1_F	clk856DDNCtM007_ch2	20.4	1104.23	1409.64	0.78334	CLK_TRPA1_F_clk856DDNCtM007_ch2
1417	CLK_TRPA1_F	clk856DDNCtM007_ch2	20.6	1103.68	1422.51	0.775865	CLK_TRPA1_F_clk856DDNCtM007_ch2
1418	CLK_TRPA1_F	clk856DDNCtM007_ch2	20.8	1126.35	1435.38	0.784706	CLK_TRPA1_F_clk856DDNCtM007_ch2
1419	CLK_TRPA1_F	clk856DDNCtM007_ch2	21	1140.48	1448.24	0.787495	CLK_TRPA1_F_clk856DDNCtM007_ch2
1420	CLK_TRPA1_F	clk856DDNCtM007_ch2	21.2	1210.03	1461.09	0.828164	CLK_TRPA1_F_clk856DDNCtM007_ch2
1421	CLK_TRPA1_F	clk856DDNCtM007_ch2	21.4	1271.48	1473.95	0.862639	CLK_TRPA1_F_clk856DDNCtM007_ch2
1422	CLK_TRPA1_F	clk856DDNCtM007_ch2	21.6	1294.21	1486.79	0.870471	CLK_TRPA1_F_clk856DDNCtM007_ch2
1423	CLK_TRPA1_F	clk856DDNCtM007_ch2	21.8	1288.05	1499.64	0.858909	CLK_TRPA1_F_clk856DDNCtM007_ch2
1424	CLK_TRPA1_F	clk856DDNCtM007_ch2	22	1240.86	1512.48	0.820416	CLK_TRPA1_F_clk856DDNCtM007_ch2
1425	CLK_TRPA1_F	clk856DDNCtM007_ch2	22.2	1244.69	1525.32	0.816018	CLK_TRPA1_F_clk856DDNCtM007_ch2
1426	CLK_TRPA1_F	clk856DDNCtM007_ch2	22.4	1272.24	1538.15	0.827126	CLK_TRPA1_F_clk856DDNCtM007_ch2
1427	CLK_TRPA1_F	clk856DDNCtM007_ch2	22.6	1369.58	1550.98	0.883041	CLK_TRPA1_F_clk856DDNCtM007_ch2
1428	CLK_TRPA1_F	clk856DDNCtM007_ch2	22.8	1384.7	1563.8	0.885472	CLK_TRPA1_F_clk856DDNCtM007_ch2
1429	CLK_TRPA1_F	clk856DDNCtM007_ch2	23	1585.64	1576.63	1.00572	CLK_TRPA1_F_clk856DDNCtM007_ch2
1430	CLK_TRPA1_F	clk856DDNCtM007_ch2	23.2	1557.71	1589.44	0.980035	CLK_TRPA1_F_clk856DDNCtM007_ch2
1431	CLK_TRPA1_F	clk856DDNCtM007_ch2	23.4	1617.05	1602.26	1.00923	CLK_TRPA1_F_clk856DDNCtM007_ch2
1432	CLK_TRPA1_F	clk856DDNCtM007_ch2	23.6	1625.78	1615.07	1.00663	CLK_TRPA1_F_clk856DDNCtM007_ch2
1433	CLK_TRPA1_F	clk856DDNCtM007_ch2	23.8	1626.55	1627.88	0.999187	CLK_TRPA1_F_clk856DDNCtM007_ch2
1434	CLK_TRPA1_F	clk856DDNCtM007_ch2	24	1540.83	1640.68	0.939139	CLK_TRPA1_F_clk856DDNCtM007_ch2
1435	CLK_TRPA1_F	clk856DDNCtM007_ch2	24.2	1473.33	1653.48	0.891049	CLK_TRPA1_F_clk856DDNCtM007_ch2
1436	CLK_TRPA1_F	clk856DDNCtM007_ch2	24.4	1345.17	1666.28	0.807291	CLK_TRPA1_F_clk856DDNCtM007_ch2
1437	CLK_TRPA1_F	clk856DDNCtM007_ch2	24.6	1363.42	1679.08	0.812009	CLK_TRPA1_F_clk856DDNCtM007_ch2
1438	CLK_TRPA1_F	clk856DDNCtM007_ch2	24.8	1395.35	1691.87	0.824738	CLK_TRPA1_F_clk856DDNCtM007_ch2
1439	CLK_TRPA1_F	clk856DDNCtM007_ch2	25	1455.61	1704.65	0.853901	CLK_TRPA1_F_clk856DDNCtM007_ch2
1440	CLK_TRPA1_F	clk856DDNCtM007_ch2	25.2	1445.09	1717.44	0.841421	CLK_TRPA1_F_clk856DDNCtM007_ch2
1441	CLK_TRPA1_F	clk856DDNCtM007_ch2	25.4	1427.6	1730.22	0.825094	CLK_TRPA1_F_clk856DDNCtM007_ch2
1442	CLK_TRPA1_F	clk856DDNCtM007_ch2	25.6	1509.6	1743	0.866095	CLK_TRPA1_F_clk856DDNCtM007_ch2
1443	CLK_TRPA1_F	clk856DDNCtM007_ch2	25.8	1563.27	1755.78	0.890359	CLK_TRPA1_F_clk856DDNCtM007_ch2
1444	CLK_TRPA1_F	clk856DDNCtM007_ch2	26	1548.16	1768.55	0.875383	CLK_TRPA1_F_clk856DDNCtM007_ch2
1445	CLK_TRPA1_F	clk856DDNCtM007_ch2	26.2	1677.81	1781.32	0.941895	CLK_TRPA1_F_clk856DDNCtM007_ch2
1446	CLK_TRPA1_F	clk856DDNCtM007_ch2	26.4	1550.88	1794.09	0.864441	CLK_TRPA1_F_clk856DDNCtM007_ch2
1447	CLK_TRPA1_F	clk856DDNCtM007_ch2	26.6	1589.95	1806.85	0.879958	CLK_TRPA1_F_clk856DDNCtM007_ch2
1448	CLK_TRPA1_F	clk856DDNCtM007_ch2	26.8	1455.24	1819.61	0.799753	CLK_TRPA1_F_clk856DDNCtM007_ch2
1449	CLK_TRPA1_F	clk856DDNCtM007_ch2	27	1524.26	1832.37	0.831854	CLK_TRPA1_F_clk856DDNCtM007_ch2
1450	CLK_TRPA1_F	clk856DDNCtM007_ch2	27.2	1507.62	1845.12	0.817081	CLK_TRPA1_F_clk856DDNCtM007_ch2
1451	CLK_TRPA1_F	clk856DDNCtM007_ch2	27.4	1561.59	1857.88	0.840522	CLK_TRPA1_F_clk856DDNCtM007_ch2
1452	CLK_TRPA1_F	clk856DDNCtM007_ch2	27.6	1543	1870.63	0.824856	CLK_TRPA1_F_clk856DDNCtM007_ch2
1453	CLK_TRPA1_F	clk856DDNCtM007_ch2	27.8	1572.74	1883.37	0.835064	CLK_TRPA1_F_clk856DDNCtM007_ch2
1454	CLK_TRPA1_F	clk856DDNCtM007_ch2	28	1554.11	1896.12	0.819627	CLK_TRPA1_F_clk856DDNCtM007_ch2
1455	CLK_TRPA1_F	clk856DDNCtM007_ch2	28.2	1592.15	1908.86	0.834084	CLK_TRPA1_F_clk856DDNCtM007_ch2
1456	CLK_TRPA1_F	clk856DDNCtM007_ch2	28.4	1622.94	1921.6	0.844579	CLK_TRPA1_F_clk856DDNCtM007_ch2
1457	CLK_TRPA1_F	clk856DDNCtM007_ch2	28.6	1548.75	1934.34	0.800663	CLK_TRPA1_F_clk856DDNCtM007_ch2
1458	CLK_TRPA1_F	clk856DDNCtM007_ch2	28.8	1568.72	1947.07	0.805684	CLK_TRPA1_F_clk856DDNCtM007_ch2
1459	CLK_TRPA1_F	clk856DDNCtM007_ch2	29	1585.2	1959.8	0.808855	CLK_TRPA1_F_clk856DDNCtM007_ch2
1460	CLK_TRPA1_F	clk856DDNCtM007_ch2	29.2	1634.02	1972.53	0.828386	CLK_TRPA1_F_clk856DDNCtM007_ch2
1461	CLK_TRPA1_F	clk856DDNCtM007_ch2	29.4	1691.62	1985.26	0.852091	CLK_TRPA1_F_clk856DDNCtM007_ch2
1462	CLK_TRPA1_F	clk856DDNCtM007_ch2	29.6	1684.44	1997.98	0.843068	CLK_TRPA1_F_clk856DDNCtM007_ch2
1463	CLK_TRPA1_F	clk856DDNCtM007_ch2	29.8	1710.21	2010.7	0.850555	CLK_TRPA1_F_clk856DDNCtM007_ch2
1464	CLK_TRPA1_F	clk856DDNCtM007_ch2	30	1761.01	2023.42	0.870314	CLK_TRPA1_F_clk856DDNCtM007_ch2
1465	CLK_TRPA1_F	clk856DDNCtM007_ch3	18	1112.79	1254.87	0.886775	CLK_TRPA1_F_clk856DDNCtM007_ch3
1466	CLK_TRPA1_F	clk856DDNCtM007_ch3	18.2	1030.59	1267.79	0.812898	CLK_TRPA1_F_clk856DDNCtM007_ch3
1467	CLK_TRPA1_F	clk856DDNCtM007_ch3	18.4	1022.01	1280.71	0.797999	CLK_TRPA1_F_clk856DDNCtM007_ch3
1468	CLK_TRPA1_F	clk856DDNCtM007_ch3	18.6	984.992	1293.63	0.761418	CLK_TRPA1_F_clk856DDNCtM007_ch3
1469	CLK_TRPA1_F	clk856DDNCtM007_ch3	18.8	1017.62	1306.54	0.778871	CLK_TRPA1_F_clk856DDNCtM007_ch3
1470	CLK_TRPA1_F	clk856DDNCtM007_ch3	19	1009.15	1319.44	0.764829	CLK_TRPA1_F_clk856DDNCtM007_ch3
1471	CLK_TRPA1_F	clk856DDNCtM007_ch3	19.2	1041.12	1332.34	0.781422	CLK_TRPA1_F_clk856DDNCtM007_ch3
1472	CLK_TRPA1_F	clk856DDNCtM007_ch3	19.4	1157.92	1345.24	0.860754	CLK_TRPA1_F_clk856DDNCtM007_ch3
1473	CLK_TRPA1_F	clk856DDNCtM007_ch3	19.6	1162.72	1358.13	0.856118	CLK_TRPA1_F_clk856DDNCtM007_ch3
1474	CLK_TRPA1_F	clk856DDNCtM007_ch3	19.8	1107.54	1371.01	0.807827	CLK_TRPA1_F_clk856DDNCtM007_ch3
1475	CLK_TRPA1_F	clk856DDNCtM007_ch3	20	1213.36	1383.89	0.87677	CLK_TRPA1_F_clk856DDNCtM007_ch3
1476	CLK_TRPA1_F	clk856DDNCtM007_ch3	20.2	1153.66	1396.77	0.825946	CLK_TRPA1_F_clk856DDNCtM007_ch3
1477	CLK_TRPA1_F	clk856DDNCtM007_ch3	20.4	1157.47	1409.64	0.821108	CLK_TRPA1_F_clk856DDNCtM007_ch3
1478	CLK_TRPA1_F	clk856DDNCtM007_ch3	20.6	1075.32	1422.51	0.75593	CLK_TRPA1_F_clk856DDNCtM007_ch3
1479	CLK_TRPA1_F	clk856DDNCtM007_ch3	20.8	1166.14	1435.38	0.812425	CLK_TRPA1_F_clk856DDNCtM007_ch3
1480	CLK_TRPA1_F	clk856DDNCtM007_ch3	21	1189	1448.24	0.820999	CLK_TRPA1_F_clk856DDNCtM007_ch3
1481	CLK_TRPA1_F	clk856DDNCtM007_ch3	21.2	1207.56	1461.09	0.826479	CLK_TRPA1_F_clk856DDNCtM007_ch3
1482	CLK_TRPA1_F	clk856DDNCtM007_ch3	21.4	1235.47	1473.95	0.838205	CLK_TRPA1_F_clk856DDNCtM007_ch3
1483	CLK_TRPA1_F	clk856DDNCtM007_ch3	21.6	1328.8	1486.79	0.893732	CLK_TRPA1_F_clk856DDNCtM007_ch3
1484	CLK_TRPA1_F	clk856DDNCtM007_ch3	21.8	1302.4	1499.64	0.868475	CLK_TRPA1_F_clk856DDNCtM007_ch3
1485	CLK_TRPA1_F	clk856DDNCtM007_ch3	22	1300.63	1512.48	0.859935	CLK_TRPA1_F_clk856DDNCtM007_ch3
1486	CLK_TRPA1_F	clk856DDNCtM007_ch3	22.2	1323.75	1525.32	0.867852	CLK_TRPA1_F_clk856DDNCtM007_ch3
1487	CLK_TRPA1_F	clk856DDNCtM007_ch3	22.4	1391.3	1538.15	0.904529	CLK_TRPA1_F_clk856DDNCtM007_ch3
1488	CLK_TRPA1_F	clk856DDNCtM007_ch3	22.6	1377.98	1550.98	0.888458	CLK_TRPA1_F_clk856DDNCtM007_ch3
1489	CLK_TRPA1_F	clk856DDNCtM007_ch3	22.8	1531.47	1563.8	0.979324	CLK_TRPA1_F_clk856DDNCtM007_ch3
1490	CLK_TRPA1_F	clk856DDNCtM007_ch3	23	1529.65	1576.63	0.970208	CLK_TRPA1_F_clk856DDNCtM007_ch3
1491	CLK_TRPA1_F	clk856DDNCtM007_ch3	23.2	1659.17	1589.44	1.04387	CLK_TRPA1_F_clk856DDNCtM007_ch3
1492	CLK_TRPA1_F	clk856DDNCtM007_ch3	23.4	1518.82	1602.26	0.947926	CLK_TRPA1_F_clk856DDNCtM007_ch3
1493	CLK_TRPA1_F	clk856DDNCtM007_ch3	23.6	1614.81	1615.07	0.999841	CLK_TRPA1_F_clk856DDNCtM007_ch3
1494	CLK_TRPA1_F	clk856DDNCtM007_ch3	23.8	1543.2	1627.88	0.947984	CLK_TRPA1_F_clk856DDNCtM007_ch3
1495	CLK_TRPA1_F	clk856DDNCtM007_ch3	24	1667.4	1640.68	1.01629	CLK_TRPA1_F_clk856DDNCtM007_ch3
1496	CLK_TRPA1_F	clk856DDNCtM007_ch3	24.2	1482.66	1653.48	0.89669	CLK_TRPA1_F_clk856DDNCtM007_ch3
1497	CLK_TRPA1_F	clk856DDNCtM007_ch3	24.4	1418.4	1666.28	0.851237	CLK_TRPA1_F_clk856DDNCtM007_ch3
1498	CLK_TRPA1_F	clk856DDNCtM007_ch3	24.6	1413.31	1679.08	0.841718	CLK_TRPA1_F_clk856DDNCtM007_ch3
1499	CLK_TRPA1_F	clk856DDNCtM007_ch3	24.8	1417.58	1691.87	0.83788	CLK_TRPA1_F_clk856DDNCtM007_ch3
1500	CLK_TRPA1_F	clk856DDNCtM007_ch3	25	1516.12	1704.65	0.889399	CLK_TRPA1_F_clk856DDNCtM007_ch3
1501	CLK_TRPA1_F	clk856DDNCtM007_ch3	25.2	1431.65	1717.44	0.833594	CLK_TRPA1_F_clk856DDNCtM007_ch3
1502	CLK_TRPA1_F	clk856DDNCtM007_ch3	25.4	1400.88	1730.22	0.809655	CLK_TRPA1_F_clk856DDNCtM007_ch3
1503	CLK_TRPA1_F	clk856DDNCtM007_ch3	25.6	1445.42	1743	0.82927	CLK_TRPA1_F_clk856DDNCtM007_ch3
1504	CLK_TRPA1_F	clk856DDNCtM007_ch3	25.8	1457.07	1755.78	0.829873	CLK_TRPA1_F_clk856DDNCtM007_ch3
1505	CLK_TRPA1_F	clk856DDNCtM007_ch3	26	1489.44	1768.55	0.842179	CLK_TRPA1_F_clk856DDNCtM007_ch3
1506	CLK_TRPA1_F	clk856DDNCtM007_ch3	26.2	1449.36	1781.32	0.813643	CLK_TRPA1_F_clk856DDNCtM007_ch3
1507	CLK_TRPA1_F	clk856DDNCtM007_ch3	26.4	1501.03	1794.09	0.836656	CLK_TRPA1_F_clk856DDNCtM007_ch3
1508	CLK_TRPA1_F	clk856DDNCtM007_ch3	26.6	1597.71	1806.85	0.88425	CLK_TRPA1_F_clk856DDNCtM007_ch3
1509	CLK_TRPA1_F	clk856DDNCtM007_ch3	26.8	1493.61	1819.61	0.82084	CLK_TRPA1_F_clk856DDNCtM007_ch3
1510	CLK_TRPA1_F	clk856DDNCtM007_ch3	27	1466.18	1832.37	0.800156	CLK_TRPA1_F_clk856DDNCtM007_ch3
1511	CLK_TRPA1_F	clk856DDNCtM007_ch3	27.2	1484.95	1845.12	0.804795	CLK_TRPA1_F_clk856DDNCtM007_ch3
1512	CLK_TRPA1_F	clk856DDNCtM007_ch3	27.4	1509.99	1857.88	0.81275	CLK_TRPA1_F_clk856DDNCtM007_ch3
1513	CLK_TRPA1_F	clk856DDNCtM007_ch3	27.6	1544.99	1870.63	0.82592	CLK_TRPA1_F_clk856DDNCtM007_ch3
1514	CLK_TRPA1_F	clk856DDNCtM007_ch3	27.8	1531.78	1883.37	0.813317	CLK_TRPA1_F_clk856DDNCtM007_ch3
1515	CLK_TRPA1_F	clk856DDNCtM007_ch3	28	1557.37	1896.12	0.821346	CLK_TRPA1_F_clk856DDNCtM007_ch3
1516	CLK_TRPA1_F	clk856DDNCtM007_ch3	28.2	1481.48	1908.86	0.776105	CLK_TRPA1_F_clk856DDNCtM007_ch3
1517	CLK_TRPA1_F	clk856DDNCtM007_ch3	28.4	1642.72	1921.6	0.85487	CLK_TRPA1_F_clk856DDNCtM007_ch3
1518	CLK_TRPA1_F	clk856DDNCtM007_ch3	28.6	1612.97	1934.34	0.833861	CLK_TRPA1_F_clk856DDNCtM007_ch3
1519	CLK_TRPA1_F	clk856DDNCtM007_ch3	28.8	1642.85	1947.07	0.843754	CLK_TRPA1_F_clk856DDNCtM007_ch3
1520	CLK_TRPA1_F	clk856DDNCtM007_ch3	29	1661.31	1959.8	0.847691	CLK_TRPA1_F_clk856DDNCtM007_ch3
1521	CLK_TRPA1_F	clk856DDNCtM007_ch3	29.2	1734.11	1972.53	0.879129	CLK_TRPA1_F_clk856DDNCtM007_ch3
1522	CLK_TRPA1_F	clk856DDNCtM007_ch3	29.4	1636.52	1985.26	0.824335	CLK_TRPA1_F_clk856DDNCtM007_ch3
1523	CLK_TRPA1_F	clk856DDNCtM007_ch3	29.6	1764.26	1997.98	0.883021	CLK_TRPA1_F_clk856DDNCtM007_ch3
1524	CLK_TRPA1_F	clk856DDNCtM007_ch3	29.8	1666.01	2010.7	0.82857	CLK_TRPA1_F_clk856DDNCtM007_ch3
1525	CLK_TRPA1_F	clk856DDNCtM007_ch3	30	1890.93	2023.42	0.934519	CLK_TRPA1_F_clk856DDNCtM007_ch3
1526	CLK_TRPA1_F	clk856DDNCtM007_ch4	18	1053.47	1254.87	0.839503	CLK_TRPA1_F_clk856DDNCtM007_ch4
1527	CLK_TRPA1_F	clk856DDNCtM007_ch4	18.2	1024.62	1267.79	0.80819	CLK_TRPA1_F_clk856DDNCtM007_ch4
1528	CLK_TRPA1_F	clk856DDNCtM007_ch4	18.4	1050.8	1280.71	0.820483	CLK_TRPA1_F_clk856DDNCtM007_ch4
1529	CLK_TRPA1_F	clk856DDNCtM007_ch4	18.6	902.069	1293.63	0.697318	CLK_TRPA1_F_clk856DDNCtM007_ch4
1530	CLK_TRPA1_F	clk856DDNCtM007_ch4	18.8	980.953	1306.54	0.750804	CLK_TRPA1_F_clk856DDNCtM007_ch4
1531	CLK_TRPA1_F	clk856DDNCtM007_ch4	19	1012.16	1319.44	0.767115	CLK_TRPA1_F_clk856DDNCtM007_ch4
1532	CLK_TRPA1_F	clk856DDNCtM007_ch4	19.2	970.278	1332.34	0.72825	CLK_TRPA1_F_clk856DDNCtM007_ch4
1533	CLK_TRPA1_F	clk856DDNCtM007_ch4	19.4	1040.89	1345.24	0.773758	CLK_TRPA1_F_clk856DDNCtM007_ch4
1534	CLK_TRPA1_F	clk856DDNCtM007_ch4	19.6	1149.46	1358.13	0.846354	CLK_TRPA1_F_clk856DDNCtM007_ch4
1535	CLK_TRPA1_F	clk856DDNCtM007_ch4	19.8	1187.94	1371.01	0.866469	CLK_TRPA1_F_clk856DDNCtM007_ch4
1536	CLK_TRPA1_F	clk856DDNCtM007_ch4	20	1182.6	1383.89	0.854542	CLK_TRPA1_F_clk856DDNCtM007_ch4
1537	CLK_TRPA1_F	clk856DDNCtM007_ch4	20.2	1009.11	1396.77	0.722461	CLK_TRPA1_F_clk856DDNCtM007_ch4
1538	CLK_TRPA1_F	clk856DDNCtM007_ch4	20.4	1030.18	1409.64	0.730811	CLK_TRPA1_F_clk856DDNCtM007_ch4
1539	CLK_TRPA1_F	clk856DDNCtM007_ch4	20.6	1133.19	1422.51	0.796609	CLK_TRPA1_F_clk856DDNCtM007_ch4
1540	CLK_TRPA1_F	clk856DDNCtM007_ch4	20.8	1079.96	1435.38	0.752386	CLK_TRPA1_F_clk856DDNCtM007_ch4
1541	CLK_TRPA1_F	clk856DDNCtM007_ch4	21	1069.27	1448.24	0.738328	CLK_TRPA1_F_clk856DDNCtM007_ch4
1542	CLK_TRPA1_F	clk856DDNCtM007_ch4	21.2	1200.31	1461.09	0.821516	CLK_TRPA1_F_clk856DDNCtM007_ch4
1543	CLK_TRPA1_F	clk856DDNCtM007_ch4	21.4	1255.88	1473.95	0.852053	CLK_TRPA1_F_clk856DDNCtM007_ch4
1544	CLK_TRPA1_F	clk856DDNCtM007_ch4	21.6	1234.87	1486.79	0.83056	CLK_TRPA1_F_clk856DDNCtM007_ch4
1545	CLK_TRPA1_F	clk856DDNCtM007_ch4	21.8	1299.44	1499.64	0.866501	CLK_TRPA1_F_clk856DDNCtM007_ch4
1546	CLK_TRPA1_F	clk856DDNCtM007_ch4	22	1103.89	1512.48	0.729856	CLK_TRPA1_F_clk856DDNCtM007_ch4
1547	CLK_TRPA1_F	clk856DDNCtM007_ch4	22.2	1217.37	1525.32	0.798113	CLK_TRPA1_F_clk856DDNCtM007_ch4
1548	CLK_TRPA1_F	clk856DDNCtM007_ch4	22.4	1289.15	1538.15	0.838119	CLK_TRPA1_F_clk856DDNCtM007_ch4
1549	CLK_TRPA1_F	clk856DDNCtM007_ch4	22.6	1403.81	1550.98	0.905114	CLK_TRPA1_F_clk856DDNCtM007_ch4
1550	CLK_TRPA1_F	clk856DDNCtM007_ch4	22.8	1479.65	1563.8	0.946188	CLK_TRPA1_F_clk856DDNCtM007_ch4
1551	CLK_TRPA1_F	clk856DDNCtM007_ch4	23	1588.72	1576.63	1.00767	CLK_TRPA1_F_clk856DDNCtM007_ch4
1552	CLK_TRPA1_F	clk856DDNCtM007_ch4	23.2	1684.88	1589.44	1.06004	CLK_TRPA1_F_clk856DDNCtM007_ch4
1553	CLK_TRPA1_F	clk856DDNCtM007_ch4	23.4	1843.62	1602.26	1.15064	CLK_TRPA1_F_clk856DDNCtM007_ch4
1554	CLK_TRPA1_F	clk856DDNCtM007_ch4	23.6	1758.66	1615.07	1.08891	CLK_TRPA1_F_clk856DDNCtM007_ch4
1555	CLK_TRPA1_F	clk856DDNCtM007_ch4	23.8	1719.01	1627.88	1.05598	CLK_TRPA1_F_clk856DDNCtM007_ch4
1556	CLK_TRPA1_F	clk856DDNCtM007_ch4	24	1628.13	1640.68	0.992352	CLK_TRPA1_F_clk856DDNCtM007_ch4
1557	CLK_TRPA1_F	clk856DDNCtM007_ch4	24.2	1273.81	1653.48	0.770382	CLK_TRPA1_F_clk856DDNCtM007_ch4
1558	CLK_TRPA1_F	clk856DDNCtM007_ch4	24.4	1321.12	1666.28	0.792854	CLK_TRPA1_F_clk856DDNCtM007_ch4
1559	CLK_TRPA1_F	clk856DDNCtM007_ch4	24.6	1255.63	1679.08	0.747809	CLK_TRPA1_F_clk856DDNCtM007_ch4
1560	CLK_TRPA1_F	clk856DDNCtM007_ch4	24.8	1259.12	1691.87	0.744221	CLK_TRPA1_F_clk856DDNCtM007_ch4
1561	CLK_TRPA1_F	clk856DDNCtM007_ch4	25	1321.82	1704.65	0.77542	CLK_TRPA1_F_clk856DDNCtM007_ch4
1562	CLK_TRPA1_F	clk856DDNCtM007_ch4	25.2	1286.74	1717.44	0.749219	CLK_TRPA1_F_clk856DDNCtM007_ch4
1563	CLK_TRPA1_F	clk856DDNCtM007_ch4	25.4	1363.7	1730.22	0.788167	CLK_TRPA1_F_clk856DDNCtM007_ch4
1564	CLK_TRPA1_F	clk856DDNCtM007_ch4	25.6	1235.57	1743	0.708876	CLK_TRPA1_F_clk856DDNCtM007_ch4
1565	CLK_TRPA1_F	clk856DDNCtM007_ch4	25.8	1410.52	1755.78	0.803362	CLK_TRPA1_F_clk856DDNCtM007_ch4
1566	CLK_TRPA1_F	clk856DDNCtM007_ch4	26	1488.72	1768.55	0.841776	CLK_TRPA1_F_clk856DDNCtM007_ch4
1567	CLK_TRPA1_F	clk856DDNCtM007_ch4	26.2	1529.04	1781.32	0.858377	CLK_TRPA1_F_clk856DDNCtM007_ch4
1568	CLK_TRPA1_F	clk856DDNCtM007_ch4	26.4	1545.09	1794.09	0.861213	CLK_TRPA1_F_clk856DDNCtM007_ch4
1569	CLK_TRPA1_F	clk856DDNCtM007_ch4	26.6	1635.08	1806.85	0.904937	CLK_TRPA1_F_clk856DDNCtM007_ch4
[truncated: 4,531 more rows]
